# Supplementary material for: An autoinhibitory clamp of actin assembly constrains and directs synaptic endocytosis
Source: eLife journal article supplement (doi:10.7554/elife.69597), 2021-07-29
Supplement: fig1-data1 [file Figure 1-S1F_WspMyc-WspRNAi.xlsx]

## Sheet: Presynaptic-Intensity_CoV
File	PreArea	Ch-1_Mean	Ch-1_CoV	Ch-1_BGMean	Ch-2_Mean	Ch-2_CoV	Ch-2_BGMean
SD575_Con_L01_m67_a3_001-cleaned.tif	1105.1	8499.38	0.4302	421.166	972.474	0.77331	246.068
SD575_Con_L01_m67_a3_006-cleaned.tif	1154.7	9659.95	0.47345	686.931	1180.71	0.81739	347.053
SD575_Con_L01_m67_a4_002-cleaned.tif	657.351	11378	0.45844	643.986	887.93	0.8508	358.108
SD575_Con_L01_m67_a4_005-cleaned.tif	860.018	14485.3	0.48416	1281.44	1087.73	0.86888	433.622
SD575_Con_L01_m67_a5_003-cleaned.tif	1017.76	8896.22	0.51101	549.135	1193.73	0.80396	292.412
SD575_Con_L01_m67_a5_004-cleaned.tif	849.476	9357.63	0.40732	519.771	1474.16	0.73599	266.591
SD575_Con_L02_m67_a3_001-cleaned.tif	954.133	12366.2	0.45164	437.842	2989.72	0.74215	290.823
SD575_Con_L02_m67_a3_006-cleaned.tif	1121.26	10914.8	0.43514	626.197	1757.06	0.78292	356.839
SD575_Con_L02_m67_a4_002-cleaned.tif	1490.99	9791.11	0.43437	794.659	1330.39	0.78891	333.74
SD575_Con_L02_m67_a4_005-cleaned.tif	1318.88	10544.7	0.44945	632.586	1321.58	0.84538	359.264
SD575_Con_L02_m67_a5_003-cleaned.tif	1114.06	13223.8	0.46042	724.684	1856.35	0.7615	365.601
SD575_Con_L02_m67_a5_004-cleaned.tif	1613.72	5583.08	0.44175	449.609	852.668	0.71545	230.467
SD575_Con_L03_m67_a3_001-cleaned.tif	1224.11	11308.9	0.43873	316.222	1202.63	0.78933	324.839
SD575_Con_L03_m67_a3_006-cleaned.tif	886.56	10747.1	0.45998	372.615	1231.09	0.81862	239.661
SD575_Con_L03_m67_a4_002-cleaned.tif	1050.52	13449.8	0.48147	650.089	2036.48	0.7944	249.706
SD575_Con_L03_m67_a4_005-cleaned.tif	1409.9	10097.5	0.50516	848.592	945.488	0.85617	313.542
SD575_Con_L03_m67_a5_003-cleaned.tif	876.782	9423.43	0.48389	577.978	1213.81	0.77808	292.324
SD575_Con_L03_m67_a5_004-cleaned.tif	1419.98	11579.2	0.45427	962.919	861.316	0.82364	336.655
SD575_wsp_L01_m67_a3_001-cleaned.tif	1028.87	3766.73	0.46673	175.312	251.785	0.77597	142.301
SD575_wsp_L01_m67_a3_006-cleaned.tif	651.822	3932.22	0.47366	188.774	279.303	0.76889	146.677
SD575_wsp_L01_m67_a4_002-cleaned.tif	1002.67	5071.21	0.44736	183.546	312.601	0.78825	142.207
SD575_wsp_L01_m67_a4_005-cleaned.tif	1376.16	3807.96	0.48263	245.704	266.222	0.82485	167.685
SD575_wsp_L01_m67_a5_003-cleaned.tif	869.867	4080.87	0.46329	257.22	297.539	0.78787	142.735
SD575_wsp_L01_m67_a5_004-cleaned.tif	363.484	6808.05	0.47136	231.076	353.259	0.76326	147.282
SD575_wsp_L02_m67_a3_001-cleaned.tif	344.178	4869.71	0.47898	154.854	372.098	0.83	190.952
SD575_wsp_L02_m67_a3_004-cleaned.tif	500.604	8507.87	0.50199	311.762	537.325	0.94935	304.221
SD575_wsp_L02_m67_a4_002-cleaned.tif	717.404	6992.09	0.46708	240.941	385.646	0.85622	226.865
SD575_wsp_L02_m67_a4_005-cleaned.tif	426.347	7323.66	0.43804	404.277	325.292	0.8618	215.553
SD575_wsp_L02_m67_a5_003-cleaned.tif	599.858	9887	0.48599	488.694	595.212	0.88669	268.992
SD575_wsp_L02_m67_a5_006-cleaned.tif	341.813	10762.5	0.4241	882.016	618.936	0.99443	345.942
SD575_wsp_L03_m67_a3_001-cleaned.tif	192.604	6356.39	0.45467	407.507	403.585	0.78956	194.216
SD575_wsp_L03_m67_a3_006-cleaned.tif	714.4	6852.18	0.5006	285.103	422.862	0.89732	238.48
SD575_wsp_L03_m67_a4_002-cleaned.tif	748.924	3612.17	0.45699	194.787	233.785	0.80779	152.282
SD575_wsp_L03_m67_a4_005-cleaned.tif	381.316	2999.92	0.45123	113.904	216.061	0.80379	123.473
SD575_wsp_L03_m67_a5_003-cleaned.tif	572.942	4262.42	0.47121	285.978	274.801	0.80267	157.792
SD575_wsp_L03_m67_a5_004-cleaned.tif	633.707	5535.36	0.46345	309.523	323.912	0.81833	189.704
SD575_wsp_L04_m67_a3_001-cleaned.tif	1074.86	4878.87	0.44699	263.719	344.896	0.79877	166.608
SD575_wsp_L04_m67_a4_002-cleaned.tif	580.924	4003.79	0.39687	199.376	233.497	0.8215	138.404
D575_wsp_L04_m67_a3_006-cleaned.tif	1011.38	5008.91	0.44231	388.082	332.368	0.81388	174.975
D575_wsp_L04_m67_a4_005-cleaned.tif	972.284	6200.19	0.45108	339.421	344.865	0.84791	192.678
D575_wsp_L04_m67_a5_003-cleaned.tif	425.902	6748.88	0.42557	363.081	319.202	0.83447	188.357
D575_wsp_L04_m67_a5_004-cleaned.tif	450.4	7113.31	0.48268	347.698	456.12	0.93915	213.449

## Sheet: Sheet1
				1118.07	665.947		10628.1	5807.59		0.458936	0.460203		1355.3	354.215		0.797049	0.835947		313.184	190.493		1042.11	163.722
	File			PreArea			HRP Mean			HRP CoV			WspMean			WspCoV			WspBGMean			WspCorrMean	WspCorrMean
																						Control	WspRNAi
	SD575_Con_L01_m67_a3_001-cleaned.tif	SD575_wsp_L01_m67_a3_001-cleaned.tif		1105.1	1028.87		8499.38	3766.73		0.4302	0.46673		972.474	251.785		0.77331	0.77597		246.068	142.301		726.406	109.484
	SD575_Con_L01_m67_a3_006-cleaned.tif	SD575_wsp_L01_m67_a3_006-cleaned.tif		1154.7	651.822		9659.95	3932.22		0.47345	0.47366		1180.71	279.303		0.81739	0.76889		347.053	146.677		833.657	132.626
	SD575_Con_L01_m67_a4_002-cleaned.tif	SD575_wsp_L01_m67_a4_002-cleaned.tif		657.351	1002.67		11378	5071.21		0.45844	0.44736		887.93	312.601		0.8508	0.78825		358.108	142.207		529.822	170.394
	SD575_Con_L01_m67_a4_005-cleaned.tif	SD575_wsp_L01_m67_a4_005-cleaned.tif		860.018	1376.16		14485.3	3807.96		0.48416	0.48263		1087.73	266.222		0.86888	0.82485		433.622	167.685		654.108	98.5368
	SD575_Con_L01_m67_a5_003-cleaned.tif	SD575_wsp_L01_m67_a5_003-cleaned.tif		1017.76	869.867		8896.22	4080.87		0.51101	0.46329		1193.73	297.539		0.80396	0.78787		292.412	142.735		901.322	154.804
	SD575_Con_L01_m67_a5_004-cleaned.tif	SD575_wsp_L01_m67_a5_004-cleaned.tif		849.476	363.484		9357.63	6808.05		0.40732	0.47136		1474.16	353.259		0.73599	0.76326		266.591	147.282		1207.57	205.976
	SD575_Con_L02_m67_a3_001-cleaned.tif	SD575_wsp_L02_m67_a3_001-cleaned.tif		954.133	344.178		12366.2	4869.71		0.45164	0.47898		2989.72	372.098		0.74215	0.83		290.823	190.952		2698.9	181.146
	SD575_Con_L02_m67_a3_006-cleaned.tif	SD575_wsp_L02_m67_a3_004-cleaned.tif		1121.26	500.604		10914.8	8507.87		0.43514	0.50199		1757.06	537.325		0.78292	0.94935		356.839	304.221		1400.22	233.105
	SD575_Con_L02_m67_a4_002-cleaned.tif	SD575_wsp_L02_m67_a4_002-cleaned.tif		1490.99	717.404		9791.11	6992.09		0.43437	0.46708		1330.39	385.646		0.78891	0.85622		333.74	226.865		996.647	158.781
	SD575_Con_L02_m67_a4_005-cleaned.tif	SD575_wsp_L02_m67_a4_005-cleaned.tif		1318.88	426.347		10544.7	7323.66		0.44945	0.43804		1321.58	325.292		0.84538	0.8618		359.264	215.553		962.314	109.739
	SD575_Con_L02_m67_a5_003-cleaned.tif	SD575_wsp_L02_m67_a5_003-cleaned.tif		1114.06	599.858		13223.8	9887		0.46042	0.48599		1856.35	595.212		0.7615	0.88669		365.601	268.992		1490.75	326.22
	SD575_Con_L02_m67_a5_004-cleaned.tif	SD575_wsp_L02_m67_a5_006-cleaned.tif		1613.72	341.813		5583.08	10762.5		0.44175	0.4241		852.668	618.936		0.71545	0.99443		230.467	345.942		622.202	272.994
	SD575_Con_L03_m67_a3_001-cleaned.tif	SD575_wsp_L03_m67_a3_001-cleaned.tif		1224.11	192.604		11308.9	6356.39		0.43873	0.45467		1202.63	403.585		0.78933	0.78956		324.839	194.216		877.794	209.369
	SD575_Con_L03_m67_a3_006-cleaned.tif	SD575_wsp_L03_m67_a3_006-cleaned.tif		886.56	714.4		10747.1	6852.18		0.45998	0.5006		1231.09	422.862		0.81862	0.89732		239.661	238.48		991.425	184.382
	SD575_Con_L03_m67_a4_002-cleaned.tif	SD575_wsp_L03_m67_a4_002-cleaned.tif		1050.52	748.924		13449.8	3612.17		0.48147	0.45699		2036.48	233.785		0.7944	0.80779		249.706	152.282		1786.77	81.5028
	SD575_Con_L03_m67_a4_005-cleaned.tif	SD575_wsp_L03_m67_a4_005-cleaned.tif		1409.9	381.316		10097.5	2999.92		0.50516	0.45123		945.488	216.061		0.85617	0.80379		313.542	123.473		631.946	92.5873
	SD575_Con_L03_m67_a5_003-cleaned.tif	SD575_wsp_L03_m67_a5_003-cleaned.tif		876.782	572.942		9423.43	4262.42		0.48389	0.47121		1213.81	274.801		0.77808	0.80267		292.324	157.792		921.489	117.009
	SD575_Con_L03_m67_a5_004-cleaned.tif	SD575_wsp_L03_m67_a5_004-cleaned.tif		1419.98	633.707		11579.2	5535.36		0.45427	0.46345		861.316	323.912		0.82364	0.81833		336.655	189.704		524.661	134.208
		SD575_wsp_L04_m67_a3_001-cleaned.tif			1074.86			4878.87			0.44699			344.896			0.79877			166.608			178.288
		SD575_wsp_L04_m67_a4_002-cleaned.tif			580.924			4003.79			0.39687			233.497			0.8215			138.404			95.0928
		D575_wsp_L04_m67_a3_006-cleaned.tif			1011.38			5008.91			0.44231			332.368			0.81388			174.975			157.393
		D575_wsp_L04_m67_a4_005-cleaned.tif			972.284			6200.19			0.45108			344.865			0.84791			192.678			152.187
		D575_wsp_L04_m67_a5_003-cleaned.tif			425.902			6748.88			0.42557			319.202			0.83447			188.357			130.845
		D575_wsp_L04_m67_a5_004-cleaned.tif			450.4			7113.31			0.48268			456.12			0.93915			213.449			242.671
