# Supplementary material for: An autoinhibitory clamp of actin assembly constrains and directs synaptic endocytosis
Source: eLife journal article supplement (doi:10.7554/elife.69597), 2021-07-29
Supplement: fig1-data1 [file Figure 1-S2_source data parameter test.xlsx]

## Sheet: 190724_PatchTrackParameterTest
File	Area	Mean	L10-F15-Q0	L10-F15-Q30	L10-F15-Q100	L10-F20-Q0	L10-F20-Q30	L10-F20-Q100	L10-F25-Q0	L10-F25-Q30	L10-F25-Q100	L10-F30-Q0	L10-F30-Q30	L10-F30-Q100	L10-F35-Q0	L10-F35-Q30	L10-F35-Q100	L10-F40-Q0	L10-F40-Q30	L10-F40-Q100	L30-F15-Q0	L30-F15-Q30	L30-F15-Q100	L30-F20-Q0	L30-F20-Q30	L30-F20-Q100	L30-F25-Q0	L30-F25-Q30	L30-F25-Q100	L30-F30-Q0	L30-F30-Q30	L30-F30-Q100	L30-F35-Q0	L30-F35-Q30	L30-F35-Q100	L30-F40-Q0	L30-F40-Q30	L30-F40-Q100	L50-F15-Q0	L50-F15-Q30	L50-F15-Q100	L50-F20-Q0	L50-F20-Q30	L50-F20-Q100	L50-F25-Q0	L50-F25-Q30	L50-F25-Q100	L50-F30-Q0	L50-F30-Q30
CON_01_m67_001_ Reg.tif	163.804	2115.21	2.45535	5.03146	8.49311	3.78366	6.80254	8.97613	4.18618	6.72203	8.2516	3.98492	5.87675	7.1648	3.82391	5.07171	6.27926	3.6629	5.03146	5.87675	1.0868	3.30064	9.53965	1.93208	4.7497	9.05663	2.61636	4.87046	7.80883	2.45535	4.30693	6.68178	2.73712	3.98492	5.87675	2.05284	3.54215	5.23272	0.885537	2.89812	9.94217	1.85158	4.58869	8.97613	2.45535	4.7497	8.09059	2.4151	4.30693
CON_01_m67_002_ Reg.tif	232.302	1485.38	2.63961	4.91024	7.66338	3.68977	6.15909	8.42972	3.9736	5.98879	8.00397	4.51288	6.18747	7.89044	4.08714	5.76173	6.84027	3.80331	5.22245	6.01717	1.10693	3.88845	10.303	1.75974	4.71156	9.56503	2.12872	4.85347	8.88384	2.41254	5.08054	8.06074	2.52608	4.73994	6.84027	2.3274	4.22905	5.84687	0.766338	3.12212	10.2462	1.64621	4.20067	9.36635	1.84489	4.3142	8.54325	2.27063	4.88186
CON_01_m67_003_ Reg.tif	117.547	814.761	3.58988	5.44091	6.50665	3.87034	5.60918	6.45056	3.58988	4.99217	5.38481	3.36551	4.20689	4.54344	3.19723	3.58988	3.75815	2.80459	3.14114	3.25333	2.01931	5.55309	9.64779	3.75815	6.8432	9.08688	3.25333	5.83355	7.01148	2.80459	4.59953	5.10436	2.97287	3.81424	4.15079	2.52413	3.02896	3.19723	1.73885	4.93608	9.5917	3.75815	7.23584	9.42343	2.97287	6.00182	7.12366	2.63632	4.54344
CON_02f_m67_001_ Reg.tif	249.138	1057.73	2.06867	3.64333	4.47698	2.80969	3.73596	4.69311	2.90232	4.01384	4.47698	2.56268	3.48896	4.10647	2.59356	3.33458	3.92122	2.53181	3.14932	3.76684	1.51291	3.76684	6.82353	1.45116	3.55071	5.89726	1.57466	3.33458	5.06362	1.38941	2.59356	4.29172	1.42028	2.59356	3.85946	1.20415	2.43918	3.58158	1.57466	3.33458	6.79266	1.23503	3.08757	5.71201	1.38941	2.90232	4.53873	1.20415	2.37743
CON_02f_m67_002_ Reg.tif	96.5156	1431.29	1.4346	2.93752	3.68898	1.9128	3.21078	4.09887	2.73258	3.82561	4.50875	2.86921	3.62067	4.50875	2.45932	3.55235	4.2355	2.86921	3.68898	4.2355	0.546516	1.70786	4.85033	1.02472	2.52763	5.12358	1.29797	2.25438	4.57707	1.36629	2.86921	4.7137	1.36629	2.73258	4.16718	1.4346	2.73258	3.68898	0.546516	2.04943	6.1483	0.888088	2.25438	5.39684	1.09303	2.39101	5.1919	1.09303	2.73258
CON_03f_m67_001_ Reg.tif	331.929	1007.04	2.06585	3.87346	5.83999	2.56244	4.33033	6.11809	3.11863	4.74748	6.15781	3.37687	4.70775	5.82013	3.11863	4.3502	5.32353	3.05904	4.05224	4.90639	1.15211	3.11863	7.98529	1.72816	3.97278	7.62774	2.08571	4.19129	6.97223	2.34394	4.05224	6.33659	2.16517	3.55564	5.08516	1.94666	3.23782	4.48924	0.933604	2.80081	8.85931	1.50966	3.95292	8.06475	1.9268	3.87346	7.09142	2.18503	3.95292
CON_03f_m67_002_ Reg.tif	457.138	779.9	0.346158	0.562506	0.750008	0.375004	0.677892	0.879817	0.44712	0.735585	0.850971	0.576929	0.793278	0.865394	0.562506	0.706739	0.822125	0.548083	0.735585	0.764432	0.461544	1.25482	2.82695	0.49039	1.19713	2.58176	0.677892	1.29809	2.14906	0.677892	1.09617	1.6154	0.591353	0.98078	1.37021	0.548083	0.865394	1.12501	0.461544	1.15386	4.50005	0.548083	1.50002	3.54812	0.605776	1.22598	2.50964	0.649046	1.11059
CON_03f_m67_003_ Reg.tif	359.822	796.653	1.53922	1.92403	2.0523	1.55755	1.88738	1.92403	1.55755	1.68581	1.72246	1.31933	1.39263	1.42928	1.15442	1.22771	1.24604	0.897879	0.971176	0.9895	2.60202	4.28783	6.01029	2.84023	4.56269	5.31398	2.76693	3.79308	4.39778	2.41878	3.09677	3.4266	1.979	2.56537	2.71196	1.61252	1.92403	1.99732	2.0523	4.15956	6.68828	2.54705	4.43442	5.51554	2.63867	3.77476	4.4161	2.49207	3.3533
CON_04f_m67_001_ Reg.tif	634.4	1048.31	1.05992	1.53281	2.31552	1.19037	1.92416	2.57642	1.5002	1.94047	2.5112	1.40236	1.92416	2.34813	1.33713	1.74479	2.18507	1.32082	1.66326	2.03831	0.994695	2.39705	5.18546	1.20668	2.54381	4.64735	1.36974	2.31552	4.01139	1.19037	2.13615	3.22868	1.10884	1.90786	2.73949	1.07623	1.69587	2.39705	1.02731	2.21768	6.27799	1.011	2.34813	5.18546	1.27191	2.20137	4.40275	1.12515	2.0057
CON_05_m67_001_ Reg.tif	231.662	843.034	1.3946	2.33383	3.0169	1.84998	2.56152	3.18766	1.99229	3.0169	3.32997	2.16306	2.90305	3.18766	2.10614	2.53306	2.81767	1.99229	2.39075	2.61844	1.08153	2.84613	6.40379	1.28076	3.35843	5.94841	1.67922	3.69997	5.09457	2.10614	3.47228	4.4115	1.7646	2.84613	3.58612	1.73614	2.58998	2.95997	1.08153	2.50459	7.08686	0.996145	3.1592	6.14764	1.28076	3.21613	4.98073	1.82152	3.04536
CON_05_m67_002_ Reg.tif	202.133	1015.62	1.46786	2.83786	4.14263	1.98976	3.29453	4.72977	2.54429	3.78382	4.99072	2.70738	4.04477	5.02334	2.96834	4.01215	4.59929	2.60953	3.35977	3.91429	1.01119	2.25072	6.88263	1.17429	3.03358	6.91525	1.56572	3.45762	6.45858	1.92453	3.84905	6.09977	1.98976	3.65334	5.18644	2.055	3.32715	4.63191	0.782858	1.95715	7.46977	1.04381	2.47905	7.37192	1.37	3.13143	6.62168	1.63095	3.65334
CON_06_m4_001_ Reg.tif	382.578	646.014	3.36066	4.92897	6.03196	3.56747	5.41153	6.37664	3.92939	5.41153	6.2043	4.03279	5.11855	5.77344	3.77428	4.68769	5.03237	3.30896	4.03279	4.39471	1.68895	4.39471	9.34091	2.32661	5.44599	8.80666	2.32661	5.39429	7.84154	2.98151	4.92897	6.63515	2.99874	4.56705	5.72174	2.63683	3.89492	4.86003	1.48214	4.01556	9.70283	2.13704	4.96344	8.77219	2.27491	5.03237	7.5658	2.75747	4.80833
CON_06_m4_002_ Reg.tif	151.093	652.653	1.22186	2.13826	2.88011	1.70188	2.48736	2.79283	1.78916	2.1819	2.74919	2.48736	2.96738	3.18557	2.13826	2.531	2.88011	1.74552	2.22554	2.35645	1.83279	4.45107	7.2439	1.87643	3.66559	6.10932	1.87643	3.62195	5.49838	2.09462	3.84014	4.88745	2.40009	3.7965	4.45107	1.83279	3.01102	3.4474	1.74552	3.97106	7.33118	1.48369	3.66559	6.10932	1.48369	3.4474	5.45475	1.83279	3.4474
WSP_01_m67_001_ Reg.tif	179.289	749.932	3.273	4.74402	5.47952	3.08913	4.37626	4.89112	2.72137	3.45688	3.97173	2.50072	3.05235	3.38333	2.05942	2.5375	2.8317	1.76522	2.20652	2.46395	2.6846	5.44275	8.53187	3.16268	5.6634	7.09764	2.24329	3.71431	4.44981	1.83877	2.61105	3.08913	1.43424	1.94909	2.31685	1.06648	1.50779	1.72844	2.50072	5.14855	9.04673	2.8317	5.25887	7.09764	2.13297	3.56721	4.48659	1.50779	2.35362
WSP_01_m67_002_ Reg.tif	759.627	1036.18	0.355872	0.529468	0.581547	0.355872	0.460029	0.520788	0.286433	0.329832	0.41663	0.234355	0.321153	0.373231	0.199635	0.277754	0.295113	0.147557	0.208315	0.234355	0.590226	1.24989	2.30015	0.633625	1.11969	1.83144	0.45135	0.746463	1.27593	0.42531	0.659665	0.963458	0.338512	0.538148	0.720423	0.225675	0.329832	0.477389	0.685704	1.42349	3.307	0.677024	1.24989	2.72546	0.512108	0.87666	1.84012	0.43399	0.729103
WSP_02f_m67_001_ Reg.tif	297.902	547.56	6.50704	7.72434	8.67605	5.68813	6.6841	7.43662	4.55935	5.22334	5.5996	3.40845	4.00603	4.20523	2.52314	2.85513	2.96579	1.52716	1.65996	1.68209	3.87324	6.90543	9.6499	3.82897	5.68813	7.23742	3.27565	4.86921	5.75452	3.01006	4.2495	4.55935	2.45674	2.98793	3.27565	1.59356	1.88129	1.94769	3.62978	6.86116	10.4245	3.67404	5.5332	7.32595	2.98793	4.69215	5.77666	3.07646	4.38229
WSP_03f_m67_001_ Reg.tif	239.058	1041.56	2.34437	4.13712	5.79197	2.39953	4.71632	5.84713	2.62018	4.66116	5.51616	2.81324	4.41293	5.29552	2.89598	4.60599	5.07487	2.97873	4.10954	4.63358	1.26872	3.61309	8.46731	1.65485	4.10954	8.0536	1.79275	3.83373	6.50907	1.90308	3.72341	5.76439	2.04098	3.69583	5.07487	1.87549	3.19937	4.10954	1.04807	3.28212	9.26715	1.76517	4.0268	8.24666	1.82033	3.83373	7.14343	1.87549	3.55792
WSP_03f_m67_002_ Reg.tif	285.244	896.956	1.20198	1.84919	2.33461	1.43313	1.89542	2.1728	1.13263	1.52559	1.64116	1.01706	1.22509	1.34067	0.785908	0.878368	0.947712	0.647218	0.670333	0.739678	2.011	3.79085	5.89431	1.75674	2.82002	3.90642	1.36378	2.28838	2.79691	1.15575	1.52559	1.82608	0.901482	1.06329	1.24821	0.554758	0.647218	0.785908	2.1728	4.022	7.46612	1.75674	3.05117	4.41495	1.36378	2.35772	3.05117	1.17886	1.64116
WSP_03f_m67_003_ Reg.tif	658.169	1184.68	1.00178	1.60285	2.17386	1.06189	1.54274	1.98353	1.0118	1.41251	1.77315	0.861531	1.33237	1.61287	0.7313	1.14203	1.50267	0.651157	1.04185	1.33237	0.831478	1.81322	4.2175	0.831478	1.54274	3.31589	0.651157	1.19212	2.46438	0.50089	0.961709	1.99354	0.350623	0.761353	1.65294	0.540961	0.82146	1.70303	0.771371	1.89336	5.30944	0.82146	1.55276	3.74666	0.601068	1.20214	2.61465	0.450801	0.901602
WSP_04f_m67_001_ Reg.tif	258.222	1192.23	1.20009	2.83426	3.95775	1.96611	3.34493	4.34075	2.42572	3.3194	4.03435	2.57892	3.26833	3.70241	2.11931	2.68105	3.06406	1.86397	2.29805	2.57892	0.817083	2.80872	6.23026	1.5831	3.57474	5.84725	1.6597	2.98746	4.59609	1.63417	2.91086	3.77901	1.37883	2.09378	2.80872	1.14902	1.8895	2.29805	0.766015	2.52785	7.60909	1.35329	3.52367	6.25579	1.55756	2.85979	4.49396	1.5831	2.78319
WSP_04f_m67_002_ Reg.tif	121.742	791.426	0.43327	0.649905	0.86654	0.541588	0.595746	1.24565	0.595746	0.974858	1.29981	0.595746	1.02902	1.19149	0.595746	1.02902	1.08318	0.649905	0.920699	0.920699	0.649905	1.46229	3.14121	0.812381	1.29981	2.87041	0.704064	1.67892	2.65378	0.920699	1.73308	2.16635	1.02902	1.51645	1.5706	0.758223	1.08318	1.08318	0.324953	1.19149	3.73695	0.649905	1.19149	3.14121	0.812381	1.78724	3.03289	0.86654	1.78724
WSP_04f_m67_003_ Reg.tif	134.827	1071.95	0.68464	1.36928	2.54295	1.32038	1.95611	2.78746	1.61379	2.39624	2.88527	1.61379	1.90721	2.34734	1.17367	1.41818	1.61379	0.733543	1.02696	1.17367	0.880251	2.34734	6.11285	0.880251	2.68966	4.64577	0.978057	2.39624	3.86332	1.27147	2.24953	3.27649	0.978057	1.7116	2.20063	0.733543	1.22257	1.56489	0.68464	2.05392	8.06897	0.929154	2.54295	7.04201	1.02696	2.44514	5.1348	1.46709	2.44514
WSP_05_m67_001_ Reg.tif	167.378	702.528	2.22499	3.5229	4.63539	2.3486	4.14095	5.37706	2.84304	4.51178	5.43886	3.09026	4.07915	4.57359	3.09026	3.83193	4.01734	3.02846	3.5229	3.64651	0.927079	2.84304	6.61316	1.42152	3.64651	6.86038	1.73055	4.26456	6.36594	2.3486	3.70832	5.37706	1.60694	3.09026	3.77012	1.79235	2.96665	3.21387	0.927079	2.84304	8.77635	1.48333	3.77012	7.60205	1.79235	4.38817	6.79858	2.16318	3.89373
WSP_05_m67_002_ Reg.tif	94.8089	1484.61	1.30935	2.83692	4.3645	1.7458	2.94604	4.69183	1.52757	2.83692	4.47361	1.85491	3.38249	4.80095	1.63669	2.50959	3.70982	1.7458	2.40047	3.27337	0.763787	2.50959	8.29254	0.763787	2.72781	7.63787	0.982012	2.94604	6.1103	0.872899	2.40047	5.12828	1.09112	1.96402	3.70982	1.52757	2.40047	3.60071	0.545562	1.96402	9.16544	0.982012	3.05515	9.05633	1.20024	3.05515	7.52876	1.30935	2.94604
WSP_06_m4_001_ Reg.tif	223.804	771.085	2.47469	4.00664	4.83153	3.00498	4.21286	4.97884	3.38797	4.47801	4.80207	2.97552	3.77095	4.00664	2.9166	3.47635	3.71203	2.65145	3.0639	3.18174	1.38465	3.82987	7.27676	1.82656	4.0361	6.18672	2.20954	4.09502	5.12614	1.9444	3.27012	4.06556	2.15062	2.97552	3.65311	1.64979	2.44523	2.73983	0.913278	3.53527	7.83651	1.70871	3.74149	6.24564	1.88548	3.74149	4.86099	1.85602	3.12282
WSP_06_m4_002_ Reg.tif	387.964	838.469	1.92042	2.77016	3.19504	2.48125	3.14405	3.48395	2.3283	2.77016	2.9741	1.97141	2.29431	2.44726	1.68249	1.78446	1.90343	1.24063	1.3256	1.46156	1.27462	3.00809	6.08416	1.92042	3.56892	5.14945	2.05638	2.94011	3.87483	1.73348	2.39628	2.90612	1.35959	1.73348	1.9884	0.985703	1.17265	1.42757	1.13866	3.07607	7.69868	1.83545	3.67089	6.11815	2.0054	3.02509	4.48665	1.6655	2.34529
WSP_07_m4_001_ Reg.tif	191.289	611.389	1.86129	2.1715	2.20597	1.72342	1.93023	1.93023	1.62001	1.75788	1.82682	1.13745	1.24086	1.24086	0.999581	1.03405	1.03405	0.758303	0.758303	0.758303	1.65448	2.96428	3.82598	1.37873	2.13704	2.86087	1.44767	1.86129	2.27491	1.10299	1.4132	1.72342	0.861708	1.10299	1.20639	0.723835	0.792771	0.930645	1.44767	2.96428	4.58429	1.4132	2.27491	3.06768	1.55107	2.03363	2.65406	1.13745	1.44767
WSP_07_m4_002_ Reg.tif	590.809	556.737	0.212039	0.290159	0.334799	0.234359	0.256679	0.267839	0.212039	0.223199	0.223199	0.13392	0.14508	0.14508	0.1116	0.10044	0.1116	0.0334799	0.0557998	0.0557998	0.513358	1.02672	2.03111	0.479879	1.0044	1.64051	0.446399	0.691918	1.04904	0.435239	0.613798	0.937437	0.323639	0.468719	0.591478	0.256679	0.345959	0.468719	0.636118	1.37268	3.69395	0.591478	1.3392	2.83463	0.569158	0.903957	1.76327	0.446399	0.669598
WSP_07_m4_003_ Reg.tif	181.813	500.203	1.233	1.66818	1.81324	1.12421	1.26926	1.30553	0.834088	0.870353	0.906618	0.580235	0.652765	0.689029	0.507706	0.543971	0.543971	0.362647	0.362647	0.362647	1.81324	3.40888	4.20671	1.74071	2.61106	2.90118	1.12421	1.34179	1.45059	0.761559	0.906618	0.942882	0.580235	0.652765	0.652765	0.362647	0.362647	0.362647	1.8495	3.66274	5.22212	1.70444	2.71985	3.22756	1.16047	1.34179	1.52312	0.797823	0.979147
[truncated: 43 more columns]

## Sheet: Sheet1
	Mean	SD	Min	Max
%Difference:	-0.278944	0.166451	-0.513033	0.209419	-0.0690231	-0.175693	-0.2447	-0.196514	-0.265562	-0.293286	-0.295234	-0.324962	-0.343558	-0.371174	-0.378655	-0.398331	-0.414073	-0.421197	-0.440154	-0.457918	-0.474949	-0.486937	0.0425268	-0.0783431	-0.188965	-0.12256	-0.218651	-0.26846	-0.255245	-0.304939	-0.349991	-0.321228	-0.374842	-0.398336	-0.410385	-0.448991	-0.468878	-0.441672	-0.486741	-0.513033	0.0799383	-0.00677901	-0.102114	-0.0489761	-0.176765	-0.200571	-0.17416	-0.260402	-0.286673
Control Freq:	3.50753	1.71272	1.06027	8.42842	1.89571	3.23809	4.45065	2.3739	3.6994	4.71028	2.63563	3.77276	4.54944	2.7201	3.63325	4.29591	2.56314	3.31566	3.84158	2.39646	3.05111	3.4717	1.31518	3.32445	7.15719	1.75765	3.85868	6.66768	1.93995	3.76294	5.82834	2.01277	3.53243	5.03796	2.00155	3.21061	4.2882	1.76826	2.80908	3.65041	1.1599	3.00928	7.74133	1.58889	3.6823	6.89151	1.73908	3.55861	5.887
WASp Freq:	2.51605	1.48669	0.955062	8.05683	1.76486	2.66918	3.36158	1.9074	2.71698	3.32882	1.8575	2.54676	2.98645	1.71047	2.25751	2.58472	1.50181	1.91911	2.1507	1.29908	1.60199	1.7812	1.37111	3.064	5.80474	1.54223	3.01497	4.87768	1.44479	2.61547	3.78847	1.36621	2.20832	3.03116	1.18015	1.76908	2.27756	0.987269	1.44179	1.77763	1.25262	2.98888	6.95083	1.51107	3.0314	5.50927	1.4362	2.63194	4.19936
File	Area	Mean			L10-F15-Q0	L10-F15-Q30	L10-F15-Q100	L10-F20-Q0	L10-F20-Q30	L10-F20-Q100	L10-F25-Q0	L10-F25-Q30	L10-F25-Q100	L10-F30-Q0	L10-F30-Q30	L10-F30-Q100	L10-F35-Q0	L10-F35-Q30	L10-F35-Q100	L10-F40-Q0	L10-F40-Q30	L10-F40-Q100	L30-F15-Q0	L30-F15-Q30	L30-F15-Q100	L30-F20-Q0	L30-F20-Q30	L30-F20-Q100	L30-F25-Q0	L30-F25-Q30	L30-F25-Q100	L30-F30-Q0	L30-F30-Q30	L30-F30-Q100	L30-F35-Q0	L30-F35-Q30	L30-F35-Q100	L30-F40-Q0	L30-F40-Q30	L30-F40-Q100	L50-F15-Q0	L50-F15-Q30	L50-F15-Q100	L50-F20-Q0	L50-F20-Q30	L50-F20-Q100	L50-F25-Q0	L50-F25-Q30	L50-F25-Q100
CON_01_m67_001_ Reg.tif	163.804	2115.21			2.45535	5.03146	8.49311	3.78366	6.80254	8.97613	4.18618	6.72203	8.2516	3.98492	5.87675	7.1648	3.82391	5.07171	6.27926	3.6629	5.03146	5.87675	1.0868	3.30064	9.53965	1.93208	4.7497	9.05663	2.61636	4.87046	7.80883	2.45535	4.30693	6.68178	2.73712	3.98492	5.87675	2.05284	3.54215	5.23272	0.885537	2.89812	9.94217	1.85158	4.58869	8.97613	2.45535	4.7497	8.09059
CON_01_m67_002_ Reg.tif	232.302	1485.38			2.63961	4.91024	7.66338	3.68977	6.15909	8.42972	3.9736	5.98879	8.00397	4.51288	6.18747	7.89044	4.08714	5.76173	6.84027	3.80331	5.22245	6.01717	1.10693	3.88845	10.303	1.75974	4.71156	9.56503	2.12872	4.85347	8.88384	2.41254	5.08054	8.06074	2.52608	4.73994	6.84027	2.3274	4.22905	5.84687	0.766338	3.12212	10.2462	1.64621	4.20067	9.36635	1.84489	4.3142	8.54325
CON_01_m67_003_ Reg.tif	117.547	814.761			3.58988	5.44091	6.50665	3.87034	5.60918	6.45056	3.58988	4.99217	5.38481	3.36551	4.20689	4.54344	3.19723	3.58988	3.75815	2.80459	3.14114	3.25333	2.01931	5.55309	9.64779	3.75815	6.8432	9.08688	3.25333	5.83355	7.01148	2.80459	4.59953	5.10436	2.97287	3.81424	4.15079	2.52413	3.02896	3.19723	1.73885	4.93608	9.5917	3.75815	7.23584	9.42343	2.97287	6.00182	7.12366
CON_02f_m67_001_ Reg.tif	249.138	1057.73			2.06867	3.64333	4.47698	2.80969	3.73596	4.69311	2.90232	4.01384	4.47698	2.56268	3.48896	4.10647	2.59356	3.33458	3.92122	2.53181	3.14932	3.76684	1.51291	3.76684	6.82353	1.45116	3.55071	5.89726	1.57466	3.33458	5.06362	1.38941	2.59356	4.29172	1.42028	2.59356	3.85946	1.20415	2.43918	3.58158	1.57466	3.33458	6.79266	1.23503	3.08757	5.71201	1.38941	2.90232	4.53873
CON_02f_m67_002_ Reg.tif	96.5156	1431.29			1.4346	2.93752	3.68898	1.9128	3.21078	4.09887	2.73258	3.82561	4.50875	2.86921	3.62067	4.50875	2.45932	3.55235	4.2355	2.86921	3.68898	4.2355	0.546516	1.70786	4.85033	1.02472	2.52763	5.12358	1.29797	2.25438	4.57707	1.36629	2.86921	4.7137	1.36629	2.73258	4.16718	1.4346	2.73258	3.68898	0.546516	2.04943	6.1483	0.888088	2.25438	5.39684	1.09303	2.39101	5.1919
CON_03f_m67_001_ Reg.tif	331.929	1007.04			2.06585	3.87346	5.83999	2.56244	4.33033	6.11809	3.11863	4.74748	6.15781	3.37687	4.70775	5.82013	3.11863	4.3502	5.32353	3.05904	4.05224	4.90639	1.15211	3.11863	7.98529	1.72816	3.97278	7.62774	2.08571	4.19129	6.97223	2.34394	4.05224	6.33659	2.16517	3.55564	5.08516	1.94666	3.23782	4.48924	0.933604	2.80081	8.85931	1.50966	3.95292	8.06475	1.9268	3.87346	7.09142
CON_03f_m67_002_ Reg.tif	457.138	779.9			0.346158	0.562506	0.750008	0.375004	0.677892	0.879817	0.44712	0.735585	0.850971	0.576929	0.793278	0.865394	0.562506	0.706739	0.822125	0.548083	0.735585	0.764432	0.461544	1.25482	2.82695	0.49039	1.19713	2.58176	0.677892	1.29809	2.14906	0.677892	1.09617	1.6154	0.591353	0.98078	1.37021	0.548083	0.865394	1.12501	0.461544	1.15386	4.50005	0.548083	1.50002	3.54812	0.605776	1.22598	2.50964
CON_03f_m67_003_ Reg.tif	359.822	796.653			1.53922	1.92403	2.0523	1.55755	1.88738	1.92403	1.55755	1.68581	1.72246	1.31933	1.39263	1.42928	1.15442	1.22771	1.24604	0.897879	0.971176	0.9895	2.60202	4.28783	6.01029	2.84023	4.56269	5.31398	2.76693	3.79308	4.39778	2.41878	3.09677	3.4266	1.979	2.56537	2.71196	1.61252	1.92403	1.99732	2.0523	4.15956	6.68828	2.54705	4.43442	5.51554	2.63867	3.77476	4.4161
CON_04f_m67_001_ Reg.tif	634.4	1048.31			1.05992	1.53281	2.31552	1.19037	1.92416	2.57642	1.5002	1.94047	2.5112	1.40236	1.92416	2.34813	1.33713	1.74479	2.18507	1.32082	1.66326	2.03831	0.994695	2.39705	5.18546	1.20668	2.54381	4.64735	1.36974	2.31552	4.01139	1.19037	2.13615	3.22868	1.10884	1.90786	2.73949	1.07623	1.69587	2.39705	1.02731	2.21768	6.27799	1.011	2.34813	5.18546	1.27191	2.20137	4.40275
CON_05_m67_001_ Reg.tif	231.662	843.034			1.3946	2.33383	3.0169	1.84998	2.56152	3.18766	1.99229	3.0169	3.32997	2.16306	2.90305	3.18766	2.10614	2.53306	2.81767	1.99229	2.39075	2.61844	1.08153	2.84613	6.40379	1.28076	3.35843	5.94841	1.67922	3.69997	5.09457	2.10614	3.47228	4.4115	1.7646	2.84613	3.58612	1.73614	2.58998	2.95997	1.08153	2.50459	7.08686	0.996145	3.1592	6.14764	1.28076	3.21613	4.98073
CON_05_m67_002_ Reg.tif	202.133	1015.62			1.46786	2.83786	4.14263	1.98976	3.29453	4.72977	2.54429	3.78382	4.99072	2.70738	4.04477	5.02334	2.96834	4.01215	4.59929	2.60953	3.35977	3.91429	1.01119	2.25072	6.88263	1.17429	3.03358	6.91525	1.56572	3.45762	6.45858	1.92453	3.84905	6.09977	1.98976	3.65334	5.18644	2.055	3.32715	4.63191	0.782858	1.95715	7.46977	1.04381	2.47905	7.37192	1.37	3.13143	6.62168
CON_06_m4_001_ Reg.tif	382.578	646.014			3.36066	4.92897	6.03196	3.56747	5.41153	6.37664	3.92939	5.41153	6.2043	4.03279	5.11855	5.77344	3.77428	4.68769	5.03237	3.30896	4.03279	4.39471	1.68895	4.39471	9.34091	2.32661	5.44599	8.80666	2.32661	5.39429	7.84154	2.98151	4.92897	6.63515	2.99874	4.56705	5.72174	2.63683	3.89492	4.86003	1.48214	4.01556	9.70283	2.13704	4.96344	8.77219	2.27491	5.03237	7.5658
CON_06_m4_002_ Reg.tif	151.093	652.653			1.22186	2.13826	2.88011	1.70188	2.48736	2.79283	1.78916	2.1819	2.74919	2.48736	2.96738	3.18557	2.13826	2.531	2.88011	1.74552	2.22554	2.35645	1.83279	4.45107	7.2439	1.87643	3.66559	6.10932	1.87643	3.62195	5.49838	2.09462	3.84014	4.88745	2.40009	3.7965	4.45107	1.83279	3.01102	3.4474	1.74552	3.97106	7.33118	1.48369	3.66559	6.10932	1.48369	3.4474	5.45475
WSP_01_m67_001_ Reg.tif	179.289	749.932			3.273	4.74402	5.47952	3.08913	4.37626	4.89112	2.72137	3.45688	3.97173	2.50072	3.05235	3.38333	2.05942	2.5375	2.8317	1.76522	2.20652	2.46395	2.6846	5.44275	8.53187	3.16268	5.6634	7.09764	2.24329	3.71431	4.44981	1.83877	2.61105	3.08913	1.43424	1.94909	2.31685	1.06648	1.50779	1.72844	2.50072	5.14855	9.04673	2.8317	5.25887	7.09764	2.13297	3.56721	4.48659
WSP_01_m67_002_ Reg.tif	759.627	1036.18			0.355872	0.529468	0.581547	0.355872	0.460029	0.520788	0.286433	0.329832	0.41663	0.234355	0.321153	0.373231	0.199635	0.277754	0.295113	0.147557	0.208315	0.234355	0.590226	1.24989	2.30015	0.633625	1.11969	1.83144	0.45135	0.746463	1.27593	0.42531	0.659665	0.963458	0.338512	0.538148	0.720423	0.225675	0.329832	0.477389	0.685704	1.42349	3.307	0.677024	1.24989	2.72546	0.512108	0.87666	1.84012
WSP_02f_m67_001_ Reg.tif	297.902	547.56			6.50704	7.72434	8.67605	5.68813	6.6841	7.43662	4.55935	5.22334	5.5996	3.40845	4.00603	4.20523	2.52314	2.85513	2.96579	1.52716	1.65996	1.68209	3.87324	6.90543	9.6499	3.82897	5.68813	7.23742	3.27565	4.86921	5.75452	3.01006	4.2495	4.55935	2.45674	2.98793	3.27565	1.59356	1.88129	1.94769	3.62978	6.86116	10.4245	3.67404	5.5332	7.32595	2.98793	4.69215	5.77666
WSP_03f_m67_001_ Reg.tif	239.058	1041.56			2.34437	4.13712	5.79197	2.39953	4.71632	5.84713	2.62018	4.66116	5.51616	2.81324	4.41293	5.29552	2.89598	4.60599	5.07487	2.97873	4.10954	4.63358	1.26872	3.61309	8.46731	1.65485	4.10954	8.0536	1.79275	3.83373	6.50907	1.90308	3.72341	5.76439	2.04098	3.69583	5.07487	1.87549	3.19937	4.10954	1.04807	3.28212	9.26715	1.76517	4.0268	8.24666	1.82033	3.83373	7.14343
WSP_03f_m67_002_ Reg.tif	285.244	896.956			1.20198	1.84919	2.33461	1.43313	1.89542	2.1728	1.13263	1.52559	1.64116	1.01706	1.22509	1.34067	0.785908	0.878368	0.947712	0.647218	0.670333	0.739678	2.011	3.79085	5.89431	1.75674	2.82002	3.90642	1.36378	2.28838	2.79691	1.15575	1.52559	1.82608	0.901482	1.06329	1.24821	0.554758	0.647218	0.785908	2.1728	4.022	7.46612	1.75674	3.05117	4.41495	1.36378	2.35772	3.05117
WSP_03f_m67_003_ Reg.tif	658.169	1184.68			1.00178	1.60285	2.17386	1.06189	1.54274	1.98353	1.0118	1.41251	1.77315	0.861531	1.33237	1.61287	0.7313	1.14203	1.50267	0.651157	1.04185	1.33237	0.831478	1.81322	4.2175	0.831478	1.54274	3.31589	0.651157	1.19212	2.46438	0.50089	0.961709	1.99354	0.350623	0.761353	1.65294	0.540961	0.82146	1.70303	0.771371	1.89336	5.30944	0.82146	1.55276	3.74666	0.601068	1.20214	2.61465
WSP_04f_m67_001_ Reg.tif	258.222	1192.23			1.20009	2.83426	3.95775	1.96611	3.34493	4.34075	2.42572	3.3194	4.03435	2.57892	3.26833	3.70241	2.11931	2.68105	3.06406	1.86397	2.29805	2.57892	0.817083	2.80872	6.23026	1.5831	3.57474	5.84725	1.6597	2.98746	4.59609	1.63417	2.91086	3.77901	1.37883	2.09378	2.80872	1.14902	1.8895	2.29805	0.766015	2.52785	7.60909	1.35329	3.52367	6.25579	1.55756	2.85979	4.49396
WSP_04f_m67_002_ Reg.tif	121.742	791.426			0.43327	0.649905	0.86654	0.541588	0.595746	1.24565	0.595746	0.974858	1.29981	0.595746	1.02902	1.19149	0.595746	1.02902	1.08318	0.649905	0.920699	0.920699	0.649905	1.46229	3.14121	0.812381	1.29981	2.87041	0.704064	1.67892	2.65378	0.920699	1.73308	2.16635	1.02902	1.51645	1.5706	0.758223	1.08318	1.08318	0.324953	1.19149	3.73695	0.649905	1.19149	3.14121	0.812381	1.78724	3.03289
WSP_04f_m67_003_ Reg.tif	134.827	1071.95			0.68464	1.36928	2.54295	1.32038	1.95611	2.78746	1.61379	2.39624	2.88527	1.61379	1.90721	2.34734	1.17367	1.41818	1.61379	0.733543	1.02696	1.17367	0.880251	2.34734	6.11285	0.880251	2.68966	4.64577	0.978057	2.39624	3.86332	1.27147	2.24953	3.27649	0.978057	1.7116	2.20063	0.733543	1.22257	1.56489	0.68464	2.05392	8.06897	0.929154	2.54295	7.04201	1.02696	2.44514	5.1348
WSP_05_m67_001_ Reg.tif	167.378	702.528			2.22499	3.5229	4.63539	2.3486	4.14095	5.37706	2.84304	4.51178	5.43886	3.09026	4.07915	4.57359	3.09026	3.83193	4.01734	3.02846	3.5229	3.64651	0.927079	2.84304	6.61316	1.42152	3.64651	6.86038	1.73055	4.26456	6.36594	2.3486	3.70832	5.37706	1.60694	3.09026	3.77012	1.79235	2.96665	3.21387	0.927079	2.84304	8.77635	1.48333	3.77012	7.60205	1.79235	4.38817	6.79858
WSP_05_m67_002_ Reg.tif	94.8089	1484.61			1.30935	2.83692	4.3645	1.7458	2.94604	4.69183	1.52757	2.83692	4.47361	1.85491	3.38249	4.80095	1.63669	2.50959	3.70982	1.7458	2.40047	3.27337	0.763787	2.50959	8.29254	0.763787	2.72781	7.63787	0.982012	2.94604	6.1103	0.872899	2.40047	5.12828	1.09112	1.96402	3.70982	1.52757	2.40047	3.60071	0.545562	1.96402	9.16544	0.982012	3.05515	9.05633	1.20024	3.05515	7.52876
WSP_06_m4_001_ Reg.tif	223.804	771.085			2.47469	4.00664	4.83153	3.00498	4.21286	4.97884	3.38797	4.47801	4.80207	2.97552	3.77095	4.00664	2.9166	3.47635	3.71203	2.65145	3.0639	3.18174	1.38465	3.82987	7.27676	1.82656	4.0361	6.18672	2.20954	4.09502	5.12614	1.9444	3.27012	4.06556	2.15062	2.97552	3.65311	1.64979	2.44523	2.73983	0.913278	3.53527	7.83651	1.70871	3.74149	6.24564	1.88548	3.74149	4.86099
WSP_06_m4_002_ Reg.tif	387.964	838.469			1.92042	2.77016	3.19504	2.48125	3.14405	3.48395	2.3283	2.77016	2.9741	1.97141	2.29431	2.44726	1.68249	1.78446	1.90343	1.24063	1.3256	1.46156	1.27462	3.00809	6.08416	1.92042	3.56892	5.14945	2.05638	2.94011	3.87483	1.73348	2.39628	2.90612	1.35959	1.73348	1.9884	0.985703	1.17265	1.42757	1.13866	3.07607	7.69868	1.83545	3.67089	6.11815	2.0054	3.02509	4.48665
WSP_07_m4_001_ Reg.tif	191.289	611.389			1.86129	2.1715	2.20597	1.72342	1.93023	1.93023	1.62001	1.75788	1.82682	1.13745	1.24086	1.24086	0.999581	1.03405	1.03405	0.758303	0.758303	0.758303	1.65448	2.96428	3.82598	1.37873	2.13704	2.86087	1.44767	1.86129	2.27491	1.10299	1.4132	1.72342	0.861708	1.10299	1.20639	0.723835	0.792771	0.930645	1.44767	2.96428	4.58429	1.4132	2.27491	3.06768	1.55107	2.03363	2.65406
WSP_07_m4_002_ Reg.tif	590.809	556.737			0.212039	0.290159	0.334799	0.234359	0.256679	0.267839	0.212039	0.223199	0.223199	0.13392	0.14508	0.14508	0.1116	0.10044	0.1116	0.0334799	0.0557998	0.0557998	0.513358	1.02672	2.03111	0.479879	1.0044	1.64051	0.446399	0.691918	1.04904	0.435239	0.613798	0.937437	0.323639	0.468719	0.591478	0.256679	0.345959	0.468719	0.636118	1.37268	3.69395	0.591478	1.3392	2.83463	0.569158	0.903957	1.76327
WSP_07_m4_003_ Reg.tif	181.813	500.203			1.233	1.66818	1.81324	1.12421	1.26926	1.30553	0.834088	0.870353	0.906618	0.580235	0.652765	0.689029	0.507706	0.543971	0.543971	0.362647	0.362647	0.362647	1.81324	3.40888	4.20671	1.74071	2.61106	2.90118	1.12421	1.34179	1.45059	0.761559	0.906618	0.942882	0.580235	0.652765	0.652765	0.362647	0.362647	0.362647	1.8495	3.66274	5.22212	1.70444	2.71985	3.22756	1.16047	1.34179	1.52312
[truncated: 45 more columns]
