# Supplementary material for: An autoinhibitory clamp of actin assembly constrains and directs synaptic endocytosis
Source: eLife journal article supplement (doi:10.7554/elife.69597), 2021-07-29
Supplement: fig1-data1 [file Figure 1A-D_source data actin dynamics.xlsx]

## Sheet: WholeNMJData
				Threshold/AFU:	0.395378
Revised FN	File	CellArea	Probe-Mean	Probe-CoV	Threshold for PT
acG-05f_m67_001	acG-05f_m67_001_ Reg.tif	43.6267	1224.81	0.68155	484.261
acG-05f_m67_002	acG-05f_m67_002_ Reg.tif	125.867	838.043	0.70916	331.343
acG-05f_m67_003	acG-05f_m67_003_ Reg.tif	125.031	784.093	0.61285	310.013
acG-06f_m67_001	acG-06f_m67_001_ Reg.tif	118.844	806.146	0.8406	318.732
acG-06f_m67_002	acG-06f_m67_002_ Reg.tif	306.098	926.919	0.68509	366.483
acR-01f_m67_001	acR-01f_m67_001_ Reg.tif	285.422	214.521	0.61152	84.8167
acR-01f_m67_002	acR-01f_m67_002_ Reg.tif	37.0844	312.902	0.41928	123.714
acR-02f_m67_001	acR-02f_m67_001_ Reg.tif	83.9111	253.669	0.64544	100.295
acR-02f_m67_002	acR-02f_m67_002_ Reg.tif	36.64	300.146	0.53743	118.671
acR-02f_m67_003	acR-02f_m67_003_ Reg.tif	92.32	211.98	0.61795	83.8121
acR-03f_m67_001	acR-03f_m67_001_ Reg.tif	135.04	275.681	0.67652	108.998
acR-03f_m67_002	acR-03f_m67_002_ Reg.tif	219.556	284.525	0.63243	112.495
acR-03f_m67_003	acR-03f_m67_003_ Reg.tif	67.5556	273.105	0.51613	107.98
acR-04f_m67_001	acR-04f_m67_001_ Reg.tif	62.6133	378.559	0.63289	149.674
acR-04f_m67_002	acR-04f_m67_002_ Reg.tif	147.413	291.25	0.67037	115.154
acR-04f_m67_003	acR-04f_m67_003_ Reg.tif	146.631	302.483	0.63218	119.595
AcR-05f_m67_001	AcR-05f_m67_001_ Reg.tif	70.4533	175.775	0.66742	69.4974
AcR-05f_m67_002	AcR-05f_m67_002_ Reg.tif	41.0133	323.299	0.61243	127.825
AcR-05f_m67_003	AcR-05f_m67_003_ Reg.tif	141.618	206.804	0.64344	81.7656
FTT-07f_m67_001	FTT-07f_m67_001_ Reg.tif	17.12	418.187	0.39366	165.342
FTT-07f_m67_002	FTT-07f_m67_002_ Reg.tif	51.6267	432.951	0.62289	171.179
FTT-07f_m67_003	FTT-07f_m67_003_ Reg.tif	34.0978	562.261	0.51536	222.305
LiG-01f_m67_002	LiG-01f_m67_002_ Reg.tif	49.1733	273.559	0.72838	108.159
LiG-03f_m67_001	LiG-03f_m67_001_ Reg.tif	38.4533	299.266	0.70705	118.323
LiG-03f_m67_002	LiG-03f_m67_002_ Reg.tif	135.289	165.048	0.73055	65.2564
LiG-03f_m67_003	LiG-03f_m67_003_ Reg.tif	80.6044	296.678	0.71472	117.3
LiG-04f_m67_001	LiG-04f_m67_001_ Reg.tif	56.8711	404.647	0.56327	159.988
LiG-04f_m67_002	LiG-04f_m67_002_ Reg.tif	33.0489	227.236	0.66865	89.8441
LiG-02f_m67_001	LiG-02f_m67_001_ Reg.tif	51.2889	153.099	0.53297	60.532
LiG-02f_m67_002	LiG-02f_m67_002_ Reg.tif	78.7733	186.472	0.53732	73.7269
LiR-01m_m67_002	LiR-01m_m67_002_ Reg.tif	144.053	989.221	0.76292	391.116
LiR-02f_m67_001	LiR-02f_m67_001_ Reg.tif	201.6	529.942	0.65823	209.527
LiR-02f_m67_002	LiR-02f_m67_002_ Reg.tif	74.0089	463.968	0.60976	183.443
LiR-02f_m67_003	LiR-02f_m67_003_ Reg.tif	82.3644	697.894	0.67062	275.932
LiR-03f_m67_001	LiR-03f_m67_001_ Reg.tif	41.8667	515.149	0.62891	203.678
LiR-03f_m67_002	LiR-03f_m67_002_ Reg.tif	67.04	740.961	0.54745	292.959
LiR-03f_m67_003	LiR-03f_m67_003_ Reg.tif	54.56	680.161	0.86848	268.921
LiR-04f_m67_001	LiR-04f_m67_001_ Reg.tif	78.0089	430.811	0.56164	170.333
LiR-04f_m67_002	LiR-04f_m67_002_ Reg.tif	61.1733	435.721	0.57426	172.274
GMA-01f_m67_002	GMA-01f_m67_002_Reg.tif	58.187	951.747	0.614	376.299
GMA-01f_m67_003	GMA-01f_m67_003_Reg.tif	154.667	613.194	0.532	242.443
GMA-03f_m67_001	GMA-03f_m67_001_Reg.tif	44.48	651.102	0.659	257.431
GMA-03f_m67_002	GMA-03f_m67_002_Reg.tif	132.551	1163.02	0.65	459.833
GMA-03f_m67_003	GMA-03f_m67_003_Reg.tif	66.631	459.021	0.577	181.487
GMA-04f_m67_001	GMA-04f_m67_001_Reg.tif	79.218	1328.73	0.646	525.352
GMA-04f_m67_002	GMA-04f_m67_002_Reg.tif	46.062	738.017	0.517	291.795
GMA-04f_m67_003	GMA-04f_m67_003_Reg.tif	53.689	715.054	0.508	282.716
GMA-05f_m67_001	GMA-05f_m67_001_Reg.tif	42.116	495.025	0.507	195.722
GMA-05f_m67_002	GMA-05f_m67_002_Reg.tif	90.08	824.144	0.509	325.848
GMA-05f_m67_003	GMA-05f_m67_003_Reg.tif	36.124	401.682	0.576	158.816
GMA-06f_m67_001	GMA-06f_m67_001_Reg.tif	236.729	524.458	0.595	207.359
GMA-06f_m67_003	GMA-06f_m67_003_Reg.tif	139.716	319.731	0.66	126.414
GMA-07f_m67_001	GMA-07f_m67_001_Reg.tif	60.587	285.179	0.541	112.753
GMA-07f_m67_003	GMA-07f_m67_003_Reg.tif	62.329	728.797	0.503	288.15
AcG-01x_m67_002	AcG-01x_m67_002x_ Reg.tif	210.436	1311.51	0.776	518.542
AcG-02x_m67_001	AcG-02x_m67_001x_ Reg.tif	89.173	1255.79	0.561	496.511
AcG-02x_m67_002	AcG-02x_m67_002x_ Reg.tif	100.587	956.908	0.721	378.34
AcG-02x_m67_003	AcG-02x_m67_003x_ Reg.tif	97.102	819.996	0.705	324.208
AcG-03x_m67_002	AcG-03x_m67_002x_ Reg.tif	81.707	1344.66	0.687	531.647
AcG-03x_m67_003	AcG-03x_m67_003x_ Reg.tif	68.178	1545.02	0.616	610.865
FTT-02x_m67_001	FTT-02x_m67_001x_ Reg.tif	266.453	402.579	0.541	159.171
FTT-03x_m67_001	FTT-03x_m67_001x_ Reg.tif	49.76	778.334	0.551	307.736
FTT-04x_m67_001	FTT-04x_m67_001x_ Reg.tif	46.418	617.696	0.509	244.223
FTT-04x_m67_002	FTT-04x_m67_002x_ Reg.tif	72.658	706.879	0.385	279.484
FTT-05x_m67_002	FTT-05x_m67_002x_ Reg.tif	68.178	712.968	0.531	281.892
FTT-06x_m67_001	FTT-06x_m67_001x_ Reg.tif	82.596	607.72	0.365	240.279
FTT-06x_m67_002	FTT-06x_m67_002x_ Reg.tif	171.093	434.977	0.586	171.98
FTT-01x_m67_001	FTT-01x_m67_001x_ Reg.tif	26.507	577.614	0.548	228.376
FTT-01x_m67_002	FTT-01x_m67_002x_ Reg.tif	174.364	611.023	0.472	241.585

## Sheet: RawPTData
NMJ	Geno	NMJ-ROI	Duration	MeanIntensity	NormIntensityRange	NMJMean	NormPatchInt	NMJArea
AcG-01x_m67_002	AcG	AcG-01x_m67_002.xlsx_RoiSetAuto-1.zip Distance px	44	17758.1	0.489735	1311.51	13.5402	1311.51
AcG-01x_m67_002	AcG	AcG-01x_m67_002.xlsx_RoiSetAuto-10.zip Distance px	36	18202.1	0.924834	1311.51	13.8787	1311.51
AcG-01x_m67_002	AcG	AcG-01x_m67_002.xlsx_RoiSetAuto-100.zip Distance px	56	24624.8	0.479912	1311.51	18.7759	1311.51
AcG-01x_m67_002	AcG	AcG-01x_m67_002.xlsx_RoiSetAuto-101.zip Distance px	24	18912.1	0.204689	1311.51	14.4201	1311.51
AcG-01x_m67_002	AcG	AcG-01x_m67_002.xlsx_RoiSetAuto-102.zip Distance px	36	21156.9	0.389565	1311.51	16.1317	1311.51
AcG-01x_m67_002	AcG	AcG-01x_m67_002.xlsx_RoiSetAuto-103.zip Distance px	36	26943.4	0.622948	1311.51	20.5438	1311.51
AcG-01x_m67_002	AcG	AcG-01x_m67_002.xlsx_RoiSetAuto-104.zip Distance px	48	22851	0.490411	1311.51	17.4234	1311.51
AcG-01x_m67_002	AcG	AcG-01x_m67_002.xlsx_RoiSetAuto-105.zip Distance px	24	17893.9	0.108056	1311.51	13.6437	1311.51
AcG-01x_m67_002	AcG	AcG-01x_m67_002.xlsx_RoiSetAuto-107.zip Distance px	28	20312.6	0.46311	1311.51	15.488	1311.51
AcG-01x_m67_002	AcG	AcG-01x_m67_002.xlsx_RoiSetAuto-108.zip Distance px	24	19241.9	0.420649	1311.51	14.6715	1311.51
AcG-01x_m67_002	AcG	AcG-01x_m67_002.xlsx_RoiSetAuto-109.zip Distance px	48	23684.3	0.463916	1311.51	18.0588	1311.51
AcG-01x_m67_002	AcG	AcG-01x_m67_002.xlsx_RoiSetAuto-11.zip Distance px	56	17376.1	0.93063	1311.51	13.2489	1311.51
AcG-01x_m67_002	AcG	AcG-01x_m67_002.xlsx_RoiSetAuto-12.zip Distance px	64	18759.1	0.932424	1311.51	14.3034	1311.51
AcG-01x_m67_002	AcG	AcG-01x_m67_002.xlsx_RoiSetAuto-14.zip Distance px	60	23350.9	0.934309	1311.51	17.8045	1311.51
AcG-01x_m67_002	AcG	AcG-01x_m67_002.xlsx_RoiSetAuto-15.zip Distance px	36	14050.7	0.2852	1311.51	10.7134	1311.51
AcG-01x_m67_002	AcG	AcG-01x_m67_002.xlsx_RoiSetAuto-17.zip Distance px	228	23958.6	1.12638	1311.51	18.268	1311.51
AcG-01x_m67_002	AcG	AcG-01x_m67_002.xlsx_RoiSetAuto-18.zip Distance px	72	20516.7	0.966428	1311.51	15.6435	1311.51
AcG-01x_m67_002	AcG	AcG-01x_m67_002.xlsx_RoiSetAuto-19.zip Distance px	36	14285.4	0.380928	1311.51	10.8923	1311.51
AcG-01x_m67_002	AcG	AcG-01x_m67_002.xlsx_RoiSetAuto-2.zip Distance px	48	21477.2	1.25751	1311.51	16.3759	1311.51
AcG-01x_m67_002	AcG	AcG-01x_m67_002.xlsx_RoiSetAuto-21.zip Distance px	24	14299.4	0.428652	1311.51	10.903	1311.51
AcG-01x_m67_002	AcG	AcG-01x_m67_002.xlsx_RoiSetAuto-22.zip Distance px	64	32363	1.26153	1311.51	24.6761	1311.51
AcG-01x_m67_002	AcG	AcG-01x_m67_002.xlsx_RoiSetAuto-24.zip Distance px	160	30146.6	1.57605	1311.51	22.9861	1311.51
AcG-01x_m67_002	AcG	AcG-01x_m67_002.xlsx_RoiSetAuto-25.zip Distance px	40	12757	0.489567	1311.51	9.72692	1311.51
AcG-01x_m67_002	AcG	AcG-01x_m67_002.xlsx_RoiSetAuto-26.zip Distance px	96	25138.3	0.939119	1311.51	19.1674	1311.51
AcG-01x_m67_002	AcG	AcG-01x_m67_002.xlsx_RoiSetAuto-27.zip Distance px	72	24908.3	0.858681	1311.51	18.9921	1311.51
AcG-01x_m67_002	AcG	AcG-01x_m67_002.xlsx_RoiSetAuto-28.zip Distance px	20	16443	0.578494	1311.51	12.5375	1311.51
AcG-01x_m67_002	AcG	AcG-01x_m67_002.xlsx_RoiSetAuto-29.zip Distance px	20	13400.4	0.405488	1311.51	10.2175	1311.51
AcG-01x_m67_002	AcG	AcG-01x_m67_002.xlsx_RoiSetAuto-3.zip Distance px	128	33787.9	1.305	1311.51	25.7625	1311.51
AcG-01x_m67_002	AcG	AcG-01x_m67_002.xlsx_RoiSetAuto-30.zip Distance px	32	16722.2	0.60582	1311.51	12.7503	1311.51
AcG-01x_m67_002	AcG	AcG-01x_m67_002.xlsx_RoiSetAuto-31.zip Distance px	24	12318	0.371351	1311.51	9.39221	1311.51
AcG-01x_m67_002	AcG	AcG-01x_m67_002.xlsx_RoiSetAuto-32.zip Distance px	32	20345.3	1.48402	1311.51	15.5128	1311.51
AcG-01x_m67_002	AcG	AcG-01x_m67_002.xlsx_RoiSetAuto-33.zip Distance px	16	13556.6	0.19219	1311.51	10.3366	1311.51
AcG-01x_m67_002	AcG	AcG-01x_m67_002.xlsx_RoiSetAuto-34.zip Distance px	16	12438.8	0.470434	1311.51	9.48432	1311.51
AcG-01x_m67_002	AcG	AcG-01x_m67_002.xlsx_RoiSetAuto-35.zip Distance px	32	19344.7	0.516392	1311.51	14.7499	1311.51
AcG-01x_m67_002	AcG	AcG-01x_m67_002.xlsx_RoiSetAuto-36.zip Distance px	36	15859.7	0.632786	1311.51	12.0927	1311.51
AcG-01x_m67_002	AcG	AcG-01x_m67_002.xlsx_RoiSetAuto-37.zip Distance px	16	14152.4	0.282745	1311.51	10.7909	1311.51
AcG-01x_m67_002	AcG	AcG-01x_m67_002.xlsx_RoiSetAuto-38.zip Distance px	16	12479.7	0.0767853	1311.51	9.51551	1311.51
AcG-01x_m67_002	AcG	AcG-01x_m67_002.xlsx_RoiSetAuto-39.zip Distance px	32	17770.1	0.849169	1311.51	13.5493	1311.51
AcG-01x_m67_002	AcG	AcG-01x_m67_002.xlsx_RoiSetAuto-4.zip Distance px	28	14458.3	0.35646	1311.51	11.0241	1311.51
AcG-01x_m67_002	AcG	AcG-01x_m67_002.xlsx_RoiSetAuto-40.zip Distance px	88	25143.3	0.91587	1311.51	19.1712	1311.51
AcG-01x_m67_002	AcG	AcG-01x_m67_002.xlsx_RoiSetAuto-41.zip Distance px	24	14200.9	0.366008	1311.51	10.8279	1311.51
AcG-01x_m67_002	AcG	AcG-01x_m67_002.xlsx_RoiSetAuto-42.zip Distance px	76	17288.9	0.579969	1311.51	13.1824	1311.51
AcG-01x_m67_002	AcG	AcG-01x_m67_002.xlsx_RoiSetAuto-43.zip Distance px	16	12598.5	0.291169	1311.51	9.60611	1311.51
AcG-01x_m67_002	AcG	AcG-01x_m67_002.xlsx_RoiSetAuto-44.zip Distance px	24	17850.7	0.0757839	1311.51	13.6108	1311.51
AcG-01x_m67_002	AcG	AcG-01x_m67_002.xlsx_RoiSetAuto-46.zip Distance px	36	14079.2	0.493041	1311.51	10.7351	1311.51
AcG-01x_m67_002	AcG	AcG-01x_m67_002.xlsx_RoiSetAuto-47.zip Distance px	16	12129.6	0.364082	1311.51	9.24856	1311.51
AcG-01x_m67_002	AcG	AcG-01x_m67_002.xlsx_RoiSetAuto-48.zip Distance px	68	19492.1	0.829318	1311.51	14.8623	1311.51
AcG-01x_m67_002	AcG	AcG-01x_m67_002.xlsx_RoiSetAuto-5.zip Distance px	52	26986.1	1.25387	1311.51	20.5763	1311.51
AcG-01x_m67_002	AcG	AcG-01x_m67_002.xlsx_RoiSetAuto-50.zip Distance px	40	22051.2	0.488441	1311.51	16.8136	1311.51
AcG-01x_m67_002	AcG	AcG-01x_m67_002.xlsx_RoiSetAuto-51.zip Distance px	64	19970.7	0.594404	1311.51	15.2272	1311.51
AcG-01x_m67_002	AcG	AcG-01x_m67_002.xlsx_RoiSetAuto-52.zip Distance px	20	14681.8	0.164768	1311.51	11.1946	1311.51
AcG-01x_m67_002	AcG	AcG-01x_m67_002.xlsx_RoiSetAuto-53.zip Distance px	24	17573.7	0.432255	1311.51	13.3996	1311.51
AcG-01x_m67_002	AcG	AcG-01x_m67_002.xlsx_RoiSetAuto-54.zip Distance px	16	12965.7	0.306245	1311.51	9.88604	1311.51
AcG-01x_m67_002	AcG	AcG-01x_m67_002.xlsx_RoiSetAuto-55.zip Distance px	44	18881.7	0.644977	1311.51	14.3969	1311.51
AcG-01x_m67_002	AcG	AcG-01x_m67_002.xlsx_RoiSetAuto-56.zip Distance px	36	23100.9	0.698229	1311.51	17.614	1311.51
AcG-01x_m67_002	AcG	AcG-01x_m67_002.xlsx_RoiSetAuto-57.zip Distance px	32	20065.7	0.750831	1311.51	15.2997	1311.51
AcG-01x_m67_002	AcG	AcG-01x_m67_002.xlsx_RoiSetAuto-58.zip Distance px	52	21127.5	0.938644	1311.51	16.1093	1311.51
AcG-01x_m67_002	AcG	AcG-01x_m67_002.xlsx_RoiSetAuto-6.zip Distance px	56	14437.2	1.01751	1311.51	11.0081	1311.51
AcG-01x_m67_002	AcG	AcG-01x_m67_002.xlsx_RoiSetAuto-60.zip Distance px	44	16231.8	0.632461	1311.51	12.3764	1311.51
AcG-01x_m67_002	AcG	AcG-01x_m67_002.xlsx_RoiSetAuto-61.zip Distance px	84	21344	0.937988	1311.51	16.2743	1311.51
AcG-01x_m67_002	AcG	AcG-01x_m67_002.xlsx_RoiSetAuto-62.zip Distance px	92	18769.3	0.716223	1311.51	14.3112	1311.51
AcG-01x_m67_002	AcG	AcG-01x_m67_002.xlsx_RoiSetAuto-63.zip Distance px	24	18378.2	0.605838	1311.51	14.013	1311.51
AcG-01x_m67_002	AcG	AcG-01x_m67_002.xlsx_RoiSetAuto-66.zip Distance px	16	14889.9	0.127734	1311.51	11.3532	1311.51
AcG-01x_m67_002	AcG	AcG-01x_m67_002.xlsx_RoiSetAuto-67.zip Distance px	36	17578.1	0.366185	1311.51	13.4029	1311.51
AcG-01x_m67_002	AcG	AcG-01x_m67_002.xlsx_RoiSetAuto-68.zip Distance px	48	19990.3	0.763221	1311.51	15.2421	1311.51
AcG-01x_m67_002	AcG	AcG-01x_m67_002.xlsx_RoiSetAuto-69.zip Distance px	24	17587.8	0.411742	1311.51	13.4103	1311.51
AcG-01x_m67_002	AcG	AcG-01x_m67_002.xlsx_RoiSetAuto-7.zip Distance px	72	27123	0.919864	1311.51	20.6807	1311.51
AcG-01x_m67_002	AcG	AcG-01x_m67_002.xlsx_RoiSetAuto-70.zip Distance px	48	18291.3	0.364025	1311.51	13.9467	1311.51
AcG-01x_m67_002	AcG	AcG-01x_m67_002.xlsx_RoiSetAuto-71.zip Distance px	28	16526.8	0.803838	1311.51	12.6013	1311.51
AcG-01x_m67_002	AcG	AcG-01x_m67_002.xlsx_RoiSetAuto-72.zip Distance px	32	16419.3	0.546609	1311.51	12.5194	1311.51
AcG-01x_m67_002	AcG	AcG-01x_m67_002.xlsx_RoiSetAuto-73.zip Distance px	36	24018.4	0.934349	1311.51	18.3136	1311.51
AcG-01x_m67_002	AcG	AcG-01x_m67_002.xlsx_RoiSetAuto-75.zip Distance px	64	19645.8	0.694505	1311.51	14.9795	1311.51
AcG-01x_m67_002	AcG	AcG-01x_m67_002.xlsx_RoiSetAuto-76.zip Distance px	84	20991.3	0.81394	1311.51	16.0055	1311.51
AcG-01x_m67_002	AcG	AcG-01x_m67_002.xlsx_RoiSetAuto-77.zip Distance px	60	21110.9	0.541893	1311.51	16.0966	1311.51
AcG-01x_m67_002	AcG	AcG-01x_m67_002.xlsx_RoiSetAuto-78.zip Distance px	36	16751.1	0.442628	1311.51	12.7724	1311.51
AcG-01x_m67_002	AcG	AcG-01x_m67_002.xlsx_RoiSetAuto-79.zip Distance px	36	20434.4	0.708316	1311.51	15.5808	1311.51
AcG-01x_m67_002	AcG	AcG-01x_m67_002.xlsx_RoiSetAuto-8.zip Distance px	72	46229.3	0.602024	1311.51	35.2488	1311.51
AcG-01x_m67_002	AcG	AcG-01x_m67_002.xlsx_RoiSetAuto-80.zip Distance px	44	19282.5	0.832544	1311.51	14.7025	1311.51
AcG-01x_m67_002	AcG	AcG-01x_m67_002.xlsx_RoiSetAuto-81.zip Distance px	48	22492.3	0.78339	1311.51	17.1499	1311.51
AcG-01x_m67_002	AcG	AcG-01x_m67_002.xlsx_RoiSetAuto-82.zip Distance px	44	22325.2	0.784097	1311.51	17.0225	1311.51
AcG-01x_m67_002	AcG	AcG-01x_m67_002.xlsx_RoiSetAuto-83.zip Distance px	40	22241.2	0.685651	1311.51	16.9585	1311.51
AcG-01x_m67_002	AcG	AcG-01x_m67_002.xlsx_RoiSetAuto-84.zip Distance px	28	18272.1	0.565844	1311.51	13.9321	1311.51
AcG-01x_m67_002	AcG	AcG-01x_m67_002.xlsx_RoiSetAuto-85.zip Distance px	48	19581.5	0.325323	1311.51	14.9305	1311.51
AcG-01x_m67_002	AcG	AcG-01x_m67_002.xlsx_RoiSetAuto-86.zip Distance px	52	17227	0.671704	1311.51	13.1352	1311.51
AcG-01x_m67_002	AcG	AcG-01x_m67_002.xlsx_RoiSetAuto-87.zip Distance px	32	20434.3	0.45971	1311.51	15.5807	1311.51
AcG-01x_m67_002	AcG	AcG-01x_m67_002.xlsx_RoiSetAuto-88.zip Distance px	36	19207.4	0.596189	1311.51	14.6452	1311.51
AcG-01x_m67_002	AcG	AcG-01x_m67_002.xlsx_RoiSetAuto-89.zip Distance px	68	21209.3	0.582006	1311.51	16.1716	1311.51
AcG-01x_m67_002	AcG	AcG-01x_m67_002.xlsx_RoiSetAuto-9.zip Distance px	28	22582.8	0.689111	1311.51	17.2189	1311.51
AcG-01x_m67_002	AcG	AcG-01x_m67_002.xlsx_RoiSetAuto-90.zip Distance px	28	16004.2	0.164517	1311.51	12.2028	1311.51
AcG-01x_m67_002	AcG	AcG-01x_m67_002.xlsx_RoiSetAuto-91.zip Distance px	56	27960.5	0.998361	1311.51	21.3193	1311.51
AcG-01x_m67_002	AcG	AcG-01x_m67_002.xlsx_RoiSetAuto-92.zip Distance px	44	18672.6	0.607257	1311.51	14.2374	1311.51
AcG-01x_m67_002	AcG	AcG-01x_m67_002.xlsx_RoiSetAuto-93.zip Distance px	20	18698.1	0.590473	1311.51	14.2569	1311.51
AcG-01x_m67_002	AcG	AcG-01x_m67_002.xlsx_RoiSetAuto-94.zip Distance px	28	22306.2	0.370838	1311.51	17.008	1311.51
AcG-01x_m67_002	AcG	AcG-01x_m67_002.xlsx_RoiSetAuto-95.zip Distance px	24	19502.8	0.411534	1311.51	14.8705	1311.51
AcG-01x_m67_002	AcG	AcG-01x_m67_002.xlsx_RoiSetAuto-96.zip Distance px	28	30142.9	0.625878	1311.51	22.9833	1311.51
AcG-01x_m67_002	AcG	AcG-01x_m67_002.xlsx_RoiSetAuto-98.zip Distance px	44	29535	0.66168	1311.51	22.5198	1311.51
AcG-01x_m67_002	AcG	AcG-01x_m67_002.xlsx_RoiSetAuto-99.zip Distance px	24	21401.7	0.454243	1311.51	16.3183	1311.51
AcG-02x_m67_001	AcG	AcG-02x_m67_001.xlsx_RoiSetAuto-10.zip Distance px	32	14853.9	1.16635	1255.79	11.8283	1255.79
AcG-02x_m67_001	AcG	AcG-02x_m67_001.xlsx_RoiSetAuto-100.zip Distance px	24	16014.4	0.381757	1255.79	12.7524	1255.79
AcG-02x_m67_001	AcG	AcG-02x_m67_001.xlsx_RoiSetAuto-101.zip Distance px	32	20727.8	0.455342	1255.79	16.5058	1255.79
AcG-02x_m67_001	AcG	AcG-02x_m67_001.xlsx_RoiSetAuto-102.zip Distance px	20	14724.2	0.20568	1255.79	11.7251	1255.79
AcG-02x_m67_001	AcG	AcG-02x_m67_001.xlsx_RoiSetAuto-103.zip Distance px	32	19615	0.394035	1255.79	15.6197	1255.79
AcG-02x_m67_001	AcG	AcG-02x_m67_001.xlsx_RoiSetAuto-104.zip Distance px	16	18119.4	0.132365	1255.79	14.4287	1255.79
AcG-02x_m67_001	AcG	AcG-02x_m67_001.xlsx_RoiSetAuto-11.zip Distance px	260	26760.7	0.948309	1255.79	21.3099	1255.79
AcG-02x_m67_001	AcG	AcG-02x_m67_001.xlsx_RoiSetAuto-12.zip Distance px	68	15781.3	0.82847	1255.79	12.5668	1255.79
AcG-02x_m67_001	AcG	AcG-02x_m67_001.xlsx_RoiSetAuto-13.zip Distance px	100	19447.9	1.17711	1255.79	15.4866	1255.79
AcG-02x_m67_001	AcG	AcG-02x_m67_001.xlsx_RoiSetAuto-14.zip Distance px	68	16172	0.741091	1255.79	12.8779	1255.79
AcG-02x_m67_001	AcG	AcG-02x_m67_001.xlsx_RoiSetAuto-16.zip Distance px	56	19618.3	0.966563	1255.79	15.6223	1255.79
AcG-02x_m67_001	AcG	AcG-02x_m67_001.xlsx_RoiSetAuto-17.zip Distance px	32	12495.9	0.57675	1255.79	9.9506	1255.79
AcG-02x_m67_001	AcG	AcG-02x_m67_001.xlsx_RoiSetAuto-2.zip Distance px	148	19633.2	1.11621	1255.79	15.6341	1255.79
AcG-02x_m67_001	AcG	AcG-02x_m67_001.xlsx_RoiSetAuto-22.zip Distance px	20	12893.6	0.448224	1255.79	10.2673	1255.79
AcG-02x_m67_001	AcG	AcG-02x_m67_001.xlsx_RoiSetAuto-23.zip Distance px	24	13083.6	0.45903	1255.79	10.4186	1255.79
AcG-02x_m67_001	AcG	AcG-02x_m67_001.xlsx_RoiSetAuto-25.zip Distance px	80	16179.5	0.925524	1255.79	12.8839	1255.79
AcG-02x_m67_001	AcG	AcG-02x_m67_001.xlsx_RoiSetAuto-26.zip Distance px	20	11356.9	0.358481	1255.79	9.04362	1255.79
AcG-02x_m67_001	AcG	AcG-02x_m67_001.xlsx_RoiSetAuto-27.zip Distance px	76	14275	0.478276	1255.79	11.3674	1255.79
AcG-02x_m67_001	AcG	AcG-02x_m67_001.xlsx_RoiSetAuto-29.zip Distance px	32	12781.9	0.480883	1255.79	10.1784	1255.79
AcG-02x_m67_001	AcG	AcG-02x_m67_001.xlsx_RoiSetAuto-30.zip Distance px	64	14026.5	0.586536	1255.79	11.1695	1255.79
AcG-02x_m67_001	AcG	AcG-02x_m67_001.xlsx_RoiSetAuto-31.zip Distance px	152	19553.8	0.792866	1255.79	15.5709	1255.79
AcG-02x_m67_001	AcG	AcG-02x_m67_001.xlsx_RoiSetAuto-32.zip Distance px	72	18166.5	0.632273	1255.79	14.4662	1255.79
AcG-02x_m67_001	AcG	AcG-02x_m67_001.xlsx_RoiSetAuto-33.zip Distance px	28	13111.8	0.388016	1255.79	10.4411	1255.79
AcG-02x_m67_001	AcG	AcG-02x_m67_001.xlsx_RoiSetAuto-35.zip Distance px	60	18284	0.749033	1255.79	14.5598	1255.79
AcG-02x_m67_001	AcG	AcG-02x_m67_001.xlsx_RoiSetAuto-36.zip Distance px	240	28613.2	0.706811	1255.79	22.785	1255.79
AcG-02x_m67_001	AcG	AcG-02x_m67_001.xlsx_RoiSetAuto-38.zip Distance px	124	21043.4	0.841091	1255.79	16.7571	1255.79
AcG-02x_m67_001	AcG	AcG-02x_m67_001.xlsx_RoiSetAuto-4.zip Distance px	20	12952.5	0.273481	1255.79	10.3143	1255.79
AcG-02x_m67_001	AcG	AcG-02x_m67_001.xlsx_RoiSetAuto-41.zip Distance px	80	19638.2	0.911445	1255.79	15.6382	1255.79
AcG-02x_m67_001	AcG	AcG-02x_m67_001.xlsx_RoiSetAuto-42.zip Distance px	124	15904	0.857356	1255.79	12.6646	1255.79
AcG-02x_m67_001	AcG	AcG-02x_m67_001.xlsx_RoiSetAuto-43.zip Distance px	24	13831.6	0.456321	1255.79	11.0142	1255.79
AcG-02x_m67_001	AcG	AcG-02x_m67_001.xlsx_RoiSetAuto-45.zip Distance px	196	24496.2	0.998293	1255.79	19.5066	1255.79
AcG-02x_m67_001	AcG	AcG-02x_m67_001.xlsx_RoiSetAuto-46.zip Distance px	56	29038.6	0.755497	1255.79	23.1238	1255.79
AcG-02x_m67_001	AcG	AcG-02x_m67_001.xlsx_RoiSetAuto-48.zip Distance px	140	17593.3	0.844448	1255.79	14.0098	1255.79
AcG-02x_m67_001	AcG	AcG-02x_m67_001.xlsx_RoiSetAuto-49.zip Distance px	36	13747.7	0.382502	1255.79	10.9474	1255.79
AcG-02x_m67_001	AcG	AcG-02x_m67_001.xlsx_RoiSetAuto-5.zip Distance px	36	16960	0.617386	1255.79	13.5055	1255.79
AcG-02x_m67_001	AcG	AcG-02x_m67_001.xlsx_RoiSetAuto-50.zip Distance px	28	16186.4	0.367442	1255.79	12.8895	1255.79
AcG-02x_m67_001	AcG	AcG-02x_m67_001.xlsx_RoiSetAuto-52.zip Distance px	88	16845.1	0.633582	1255.79	13.414	1255.79
AcG-02x_m67_001	AcG	AcG-02x_m67_001.xlsx_RoiSetAuto-53.zip Distance px	68	19047.1	0.749036	1255.79	15.1675	1255.79
AcG-02x_m67_001	AcG	AcG-02x_m67_001.xlsx_RoiSetAuto-55.zip Distance px	108	19097.6	0.683267	1255.79	15.2076	1255.79
AcG-02x_m67_001	AcG	AcG-02x_m67_001.xlsx_RoiSetAuto-57.zip Distance px	32	17458.1	0.719159	1255.79	13.9021	1255.79
AcG-02x_m67_001	AcG	AcG-02x_m67_001.xlsx_RoiSetAuto-58.zip Distance px	100	23509.3	1.06818	1255.79	18.7207	1255.79
AcG-02x_m67_001	AcG	AcG-02x_m67_001.xlsx_RoiSetAuto-59.zip Distance px	36	14399.1	0.360305	1255.79	11.4662	1255.79
AcG-02x_m67_001	AcG	AcG-02x_m67_001.xlsx_RoiSetAuto-6.zip Distance px	40	19087.8	0.433031	1255.79	15.1998	1255.79
AcG-02x_m67_001	AcG	AcG-02x_m67_001.xlsx_RoiSetAuto-60.zip Distance px	60	24950.2	1.43836	1255.79	19.8682	1255.79
AcG-02x_m67_001	AcG	AcG-02x_m67_001.xlsx_RoiSetAuto-61.zip Distance px	60	24222.6	1.02815	1255.79	19.2887	1255.79
AcG-02x_m67_001	AcG	AcG-02x_m67_001.xlsx_RoiSetAuto-64.zip Distance px	116	25237.1	0.926107	1255.79	20.0966	1255.79
AcG-02x_m67_001	AcG	AcG-02x_m67_001.xlsx_RoiSetAuto-65.zip Distance px	56	20348.6	0.944182	1255.79	16.2039	1255.79
AcG-02x_m67_001	AcG	AcG-02x_m67_001.xlsx_RoiSetAuto-66.zip Distance px	24	15481.9	0.294686	1255.79	12.3284	1255.79
AcG-02x_m67_001	AcG	AcG-02x_m67_001.xlsx_RoiSetAuto-68.zip Distance px	36	18592.6	0.613807	1255.79	14.8055	1255.79
AcG-02x_m67_001	AcG	AcG-02x_m67_001.xlsx_RoiSetAuto-69.zip Distance px	108	23358.3	1.44957	1255.79	18.6005	1255.79
AcG-02x_m67_001	AcG	AcG-02x_m67_001.xlsx_RoiSetAuto-70.zip Distance px	32	14890.4	0.551463	1255.79	11.8574	1255.79
AcG-02x_m67_001	AcG	AcG-02x_m67_001.xlsx_RoiSetAuto-73.zip Distance px	24	14412.8	0.274352	1255.79	11.477	1255.79
AcG-02x_m67_001	AcG	AcG-02x_m67_001.xlsx_RoiSetAuto-74.zip Distance px	20	14975.2	0.194021	1255.79	11.9249	1255.79
AcG-02x_m67_001	AcG	AcG-02x_m67_001.xlsx_RoiSetAuto-75.zip Distance px	20	13529.7	0.151308	1255.79	10.7738	1255.79
AcG-02x_m67_001	AcG	AcG-02x_m67_001.xlsx_RoiSetAuto-77.zip Distance px	24	15185	0.36654	1255.79	12.092	1255.79
AcG-02x_m67_001	AcG	AcG-02x_m67_001.xlsx_RoiSetAuto-78.zip Distance px	68	20562.9	0.59283	1255.79	16.3745	1255.79
AcG-02x_m67_001	AcG	AcG-02x_m67_001.xlsx_RoiSetAuto-79.zip Distance px	20	15806.5	0.458783	1255.79	12.5869	1255.79
AcG-02x_m67_001	AcG	AcG-02x_m67_001.xlsx_RoiSetAuto-8.zip Distance px	20	12604.8	0.265427	1255.79	10.0374	1255.79
AcG-02x_m67_001	AcG	AcG-02x_m67_001.xlsx_RoiSetAuto-80.zip Distance px	96	18342.6	0.477956	1255.79	14.6064	1255.79
AcG-02x_m67_001	AcG	AcG-02x_m67_001.xlsx_RoiSetAuto-81.zip Distance px	36	14684.4	0.594315	1255.79	11.6934	1255.79
AcG-02x_m67_001	AcG	AcG-02x_m67_001.xlsx_RoiSetAuto-82.zip Distance px	44	16537.3	0.455224	1255.79	13.1688	1255.79
AcG-02x_m67_001	AcG	AcG-02x_m67_001.xlsx_RoiSetAuto-83.zip Distance px	60	28568.2	0.791812	1255.79	22.7492	1255.79
AcG-02x_m67_001	AcG	AcG-02x_m67_001.xlsx_RoiSetAuto-86.zip Distance px	68	19720.8	0.577927	1255.79	15.7039	1255.79
AcG-02x_m67_001	AcG	AcG-02x_m67_001.xlsx_RoiSetAuto-87.zip Distance px	32	19745.8	0.490996	1255.79	15.7238	1255.79
AcG-02x_m67_001	AcG	AcG-02x_m67_001.xlsx_RoiSetAuto-89.zip Distance px	36	17321	0.476963	1255.79	13.7929	1255.79
AcG-02x_m67_001	AcG	AcG-02x_m67_001.xlsx_RoiSetAuto-9.zip Distance px	76	14195	0.548306	1255.79	11.3037	1255.79
AcG-02x_m67_001	AcG	AcG-02x_m67_001.xlsx_RoiSetAuto-90.zip Distance px	68	17523.1	0.546501	1255.79	13.9539	1255.79
AcG-02x_m67_001	AcG	AcG-02x_m67_001.xlsx_RoiSetAuto-91.zip Distance px	40	18821.5	0.654407	1255.79	14.9878	1255.79
AcG-02x_m67_001	AcG	AcG-02x_m67_001.xlsx_RoiSetAuto-92.zip Distance px	32	15745.2	0.372052	1255.79	12.5381	1255.79
AcG-02x_m67_001	AcG	AcG-02x_m67_001.xlsx_RoiSetAuto-94.zip Distance px	40	18494.2	0.393963	1255.79	14.7271	1255.79
AcG-02x_m67_001	AcG	AcG-02x_m67_001.xlsx_RoiSetAuto-96.zip Distance px	44	17570.4	0.625729	1255.79	13.9915	1255.79
AcG-02x_m67_001	AcG	AcG-02x_m67_001.xlsx_RoiSetAuto-97.zip Distance px	20	14702.1	0.203047	1255.79	11.7075	1255.79
AcG-02x_m67_001	AcG	AcG-02x_m67_001.xlsx_RoiSetAuto-98.zip Distance px	48	34954.2	0.948372	1255.79	27.8344	1255.79
AcG-02x_m67_002	AcG	AcG-02x_m67_002.xlsx_RoiSetAuto-10.zip Distance px	176	22774.7	1.54637	956.908	23.8003	956.908
AcG-02x_m67_002	AcG	AcG-02x_m67_002.xlsx_RoiSetAuto-11.zip Distance px	72	15304.9	1.50997	956.908	15.9941	956.908
AcG-02x_m67_002	AcG	AcG-02x_m67_002.xlsx_RoiSetAuto-13.zip Distance px	104	10178.9	0.799906	956.908	10.6372	956.908
AcG-02x_m67_002	AcG	AcG-02x_m67_002.xlsx_RoiSetAuto-14.zip Distance px	148	26951.8	1.0986	956.908	28.1656	956.908
AcG-02x_m67_002	AcG	AcG-02x_m67_002.xlsx_RoiSetAuto-19.zip Distance px	88	9906.51	0.662625	956.908	10.3526	956.908
AcG-02x_m67_002	AcG	AcG-02x_m67_002.xlsx_RoiSetAuto-2.zip Distance px	72	19670.7	0.708273	956.908	20.5565	956.908
AcG-02x_m67_002	AcG	AcG-02x_m67_002.xlsx_RoiSetAuto-20.zip Distance px	236	18554.5	1.27518	956.908	19.39	956.908
AcG-02x_m67_002	AcG	AcG-02x_m67_002.xlsx_RoiSetAuto-22.zip Distance px	28	10950.8	0.368612	956.908	11.4439	956.908
AcG-02x_m67_002	AcG	AcG-02x_m67_002.xlsx_RoiSetAuto-23.zip Distance px	32	10842.4	0.521079	956.908	11.3307	956.908
AcG-02x_m67_002	AcG	AcG-02x_m67_002.xlsx_RoiSetAuto-26.zip Distance px	56	10400	0.801135	956.908	10.8683	956.908
AcG-02x_m67_002	AcG	AcG-02x_m67_002.xlsx_RoiSetAuto-3.zip Distance px	156	19216.9	1.55307	956.908	20.0823	956.908
AcG-02x_m67_002	AcG	AcG-02x_m67_002.xlsx_RoiSetAuto-30.zip Distance px	104	13547.2	1.06182	956.908	14.1572	956.908
AcG-02x_m67_002	AcG	AcG-02x_m67_002.xlsx_RoiSetAuto-31.zip Distance px	20	9255.28	0.422287	956.908	9.67206	956.908
AcG-02x_m67_002	AcG	AcG-02x_m67_002.xlsx_RoiSetAuto-32.zip Distance px	172	19643	1.01149	956.908	20.5276	956.908
AcG-02x_m67_002	AcG	AcG-02x_m67_002.xlsx_RoiSetAuto-33.zip Distance px	116	22764.6	1.17113	956.908	23.7897	956.908
AcG-02x_m67_002	AcG	AcG-02x_m67_002.xlsx_RoiSetAuto-34.zip Distance px	64	11782.6	0.71903	956.908	12.3132	956.908
AcG-02x_m67_002	AcG	AcG-02x_m67_002.xlsx_RoiSetAuto-37.zip Distance px	84	13269.8	1.03774	956.908	13.8673	956.908
AcG-02x_m67_002	AcG	AcG-02x_m67_002.xlsx_RoiSetAuto-38.zip Distance px	36	10822.2	0.553677	956.908	11.3095	956.908
AcG-02x_m67_002	AcG	AcG-02x_m67_002.xlsx_RoiSetAuto-39.zip Distance px	60	18724.4	0.918217	956.908	19.5676	956.908
AcG-02x_m67_002	AcG	AcG-02x_m67_002.xlsx_RoiSetAuto-4.zip Distance px	100	21422.5	0.725881	956.908	22.3872	956.908
AcG-02x_m67_002	AcG	AcG-02x_m67_002.xlsx_RoiSetAuto-40.zip Distance px	32	11358.2	0.384091	956.908	11.8697	956.908
AcG-02x_m67_002	AcG	AcG-02x_m67_002.xlsx_RoiSetAuto-41.zip Distance px	180	16140.8	1.17586	956.908	16.8677	956.908
AcG-02x_m67_002	AcG	AcG-02x_m67_002.xlsx_RoiSetAuto-43.zip Distance px	16	13570.7	0.15223	956.908	14.1818	956.908
AcG-02x_m67_002	AcG	AcG-02x_m67_002.xlsx_RoiSetAuto-44.zip Distance px	28	9233.2	0.20347	956.908	9.64899	956.908
AcG-02x_m67_002	AcG	AcG-02x_m67_002.xlsx_RoiSetAuto-46.zip Distance px	40	12465	0.837523	956.908	13.0264	956.908
AcG-02x_m67_002	AcG	AcG-02x_m67_002.xlsx_RoiSetAuto-48.zip Distance px	128	10701.6	0.483206	956.908	11.1835	956.908
AcG-02x_m67_002	AcG	AcG-02x_m67_002.xlsx_RoiSetAuto-5.zip Distance px	216	19000.4	1.24997	956.908	19.856	956.908
AcG-02x_m67_002	AcG	AcG-02x_m67_002.xlsx_RoiSetAuto-51.zip Distance px	24	8710.42	0.270522	956.908	9.10267	956.908
AcG-02x_m67_002	AcG	AcG-02x_m67_002.xlsx_RoiSetAuto-53.zip Distance px	156	15597.3	1.05727	956.908	16.2997	956.908
AcG-02x_m67_002	AcG	AcG-02x_m67_002.xlsx_RoiSetAuto-55.zip Distance px	172	16864.4	0.998951	956.908	17.6239	956.908
AcG-02x_m67_002	AcG	AcG-02x_m67_002.xlsx_RoiSetAuto-56.zip Distance px	32	12555.3	0.460401	956.908	13.1206	956.908
AcG-02x_m67_002	AcG	AcG-02x_m67_002.xlsx_RoiSetAuto-57.zip Distance px	60	15005.6	0.84661	956.908	15.6813	956.908
AcG-02x_m67_002	AcG	AcG-02x_m67_002.xlsx_RoiSetAuto-58.zip Distance px	20	9534.37	0.291754	956.908	9.96373	956.908
AcG-02x_m67_002	AcG	AcG-02x_m67_002.xlsx_RoiSetAuto-59.zip Distance px	28	10892.9	0.293381	956.908	11.3834	956.908
AcG-02x_m67_002	AcG	AcG-02x_m67_002.xlsx_RoiSetAuto-6.zip Distance px	16	13972.4	0.337984	956.908	14.6016	956.908
AcG-02x_m67_002	AcG	AcG-02x_m67_002.xlsx_RoiSetAuto-60.zip Distance px	24	10035.1	0.405771	956.908	10.487	956.908
AcG-02x_m67_002	AcG	AcG-02x_m67_002.xlsx_RoiSetAuto-61.zip Distance px	32	11493.8	0.252429	956.908	12.0114	956.908
AcG-02x_m67_002	AcG	AcG-02x_m67_002.xlsx_RoiSetAuto-62.zip Distance px	72	15000.5	0.68779	956.908	15.676	956.908
AcG-02x_m67_002	AcG	AcG-02x_m67_002.xlsx_RoiSetAuto-65.zip Distance px	20	12095.9	0.53106	956.908	12.6406	956.908
AcG-02x_m67_002	AcG	AcG-02x_m67_002.xlsx_RoiSetAuto-66.zip Distance px	104	15784.5	0.869219	956.908	16.4953	956.908
AcG-02x_m67_002	AcG	AcG-02x_m67_002.xlsx_RoiSetAuto-69.zip Distance px	112	20170.7	1.08921	956.908	21.079	956.908
AcG-02x_m67_002	AcG	AcG-02x_m67_002.xlsx_RoiSetAuto-7.zip Distance px	100	18344.2	1.37399	956.908	19.1703	956.908
AcG-02x_m67_002	AcG	AcG-02x_m67_002.xlsx_RoiSetAuto-70.zip Distance px	20	13869.4	0.566107	956.908	14.4939	956.908
AcG-02x_m67_002	AcG	AcG-02x_m67_002.xlsx_RoiSetAuto-72.zip Distance px	72	29425.2	0.710444	956.908	30.7503	956.908
AcG-02x_m67_002	AcG	AcG-02x_m67_002.xlsx_RoiSetAuto-73.zip Distance px	32	12843.4	0.387171	956.908	13.4218	956.908
AcG-02x_m67_002	AcG	AcG-02x_m67_002.xlsx_RoiSetAuto-74.zip Distance px	36	13268.8	0.725128	956.908	13.8663	956.908
AcG-02x_m67_002	AcG	AcG-02x_m67_002.xlsx_RoiSetAuto-76.zip Distance px	24	11216.6	0.171036	956.908	11.7218	956.908
AcG-02x_m67_002	AcG	AcG-02x_m67_002.xlsx_RoiSetAuto-77.zip Distance px	36	11711.4	0.372664	956.908	12.2388	956.908
AcG-02x_m67_002	AcG	AcG-02x_m67_002.xlsx_RoiSetAuto-79.zip Distance px	28	10635.5	0.704909	956.908	11.1145	956.908
AcG-02x_m67_002	AcG	AcG-02x_m67_002.xlsx_RoiSetAuto-81.zip Distance px	28	14549.8	0.757442	956.908	15.205	956.908
AcG-02x_m67_002	AcG	AcG-02x_m67_002.xlsx_RoiSetAuto-82.zip Distance px	64	10283.3	0.742468	956.908	10.7464	956.908
AcG-02x_m67_002	AcG	AcG-02x_m67_002.xlsx_RoiSetAuto-83.zip Distance px	28	10694.6	0.301091	956.908	11.1762	956.908
AcG-02x_m67_002	AcG	AcG-02x_m67_002.xlsx_RoiSetAuto-85.zip Distance px	40	10501.7	0.635002	956.908	10.9746	956.908
AcG-02x_m67_002	AcG	AcG-02x_m67_002.xlsx_RoiSetAuto-86.zip Distance px	28	10935.7	0.451319	956.908	11.4282	956.908
AcG-02x_m67_002	AcG	AcG-02x_m67_002.xlsx_RoiSetAuto-88.zip Distance px	52	13609.2	0.538202	956.908	14.2221	956.908
AcG-02x_m67_002	AcG	AcG-02x_m67_002.xlsx_RoiSetAuto-89.zip Distance px	28	10360.6	0.565679	956.908	10.8272	956.908
AcG-02x_m67_002	AcG	AcG-02x_m67_002.xlsx_RoiSetAuto-9.zip Distance px	252	12324.7	1.18902	956.908	12.8797	956.908
AcG-02x_m67_002	AcG	AcG-02x_m67_002.xlsx_RoiSetAuto-90.zip Distance px	36	18712.2	0.681343	956.908	19.5549	956.908
AcG-02x_m67_002	AcG	AcG-02x_m67_002.xlsx_RoiSetAuto-91.zip Distance px	20	16556.7	0.318891	956.908	17.3023	956.908
AcG-02x_m67_002	AcG	AcG-02x_m67_002.xlsx_RoiSetAuto-92.zip Distance px	28	14073	0.79822	956.908	14.7067	956.908
AcG-02x_m67_002	AcG	AcG-02x_m67_002.xlsx_RoiSetAuto-93.zip Distance px	28	11234.9	0.231119	956.908	11.7409	956.908
AcG-02x_m67_002	AcG	AcG-02x_m67_002.xlsx_RoiSetAuto-94.zip Distance px	16	10795.9	0.425973	956.908	11.282	956.908
AcG-03x_m67_002	AcG	AcG-03x_m67_002.xlsx_RoiSetAuto-1.zip Distance px	24	13080.8	0.352161	1344.66	9.72802	1344.66
AcG-03x_m67_002	AcG	AcG-03x_m67_002.xlsx_RoiSetAuto-10.zip Distance px	76	20277.4	1.0037	1344.66	15.08	1344.66
AcG-03x_m67_002	AcG	AcG-03x_m67_002.xlsx_RoiSetAuto-11.zip Distance px	224	19969.4	1.31563	1344.66	14.8509	1344.66
AcG-03x_m67_002	AcG	AcG-03x_m67_002.xlsx_RoiSetAuto-12.zip Distance px	16	11862.1	0.0652358	1344.66	8.82164	1344.66
AcG-03x_m67_002	AcG	AcG-03x_m67_002.xlsx_RoiSetAuto-15.zip Distance px	32	14452.5	0.123664	1344.66	10.7481	1344.66
AcG-03x_m67_002	AcG	AcG-03x_m67_002.xlsx_RoiSetAuto-17.zip Distance px	28	12015.1	0.458539	1344.66	8.93547	1344.66
AcG-03x_m67_002	AcG	AcG-03x_m67_002.xlsx_RoiSetAuto-18.zip Distance px	24	12647.8	0.273307	1344.66	9.40601	1344.66
AcG-03x_m67_002	AcG	AcG-03x_m67_002.xlsx_RoiSetAuto-19.zip Distance px	24	13918.9	0.298378	1344.66	10.3512	1344.66
AcG-03x_m67_002	AcG	AcG-03x_m67_002.xlsx_RoiSetAuto-2.zip Distance px	24	20302.5	0.654933	1344.66	15.0986	1344.66
AcG-03x_m67_002	AcG	AcG-03x_m67_002.xlsx_RoiSetAuto-20.zip Distance px	84	20143.4	0.729686	1344.66	14.9803	1344.66
AcG-03x_m67_002	AcG	AcG-03x_m67_002.xlsx_RoiSetAuto-21.zip Distance px	28	12336.2	0.309565	1344.66	9.17421	1344.66
AcG-03x_m67_002	AcG	AcG-03x_m67_002.xlsx_RoiSetAuto-23.zip Distance px	56	19607.3	0.648294	1344.66	14.5816	1344.66
AcG-03x_m67_002	AcG	AcG-03x_m67_002.xlsx_RoiSetAuto-24.zip Distance px	24	13838	0.348579	1344.66	10.2911	1344.66
AcG-03x_m67_002	AcG	AcG-03x_m67_002.xlsx_RoiSetAuto-26.zip Distance px	172	26513.3	1.55102	1344.66	19.7175	1344.66
AcG-03x_m67_002	AcG	AcG-03x_m67_002.xlsx_RoiSetAuto-27.zip Distance px	44	19071.8	0.50731	1344.66	14.1834	1344.66
AcG-03x_m67_002	AcG	AcG-03x_m67_002.xlsx_RoiSetAuto-28.zip Distance px	24	14177.7	0.514339	1344.66	10.5438	1344.66
AcG-03x_m67_002	AcG	AcG-03x_m67_002.xlsx_RoiSetAuto-29.zip Distance px	32	16152	0.623701	1344.66	12.012	1344.66
AcG-03x_m67_002	AcG	AcG-03x_m67_002.xlsx_RoiSetAuto-3.zip Distance px	84	24248.9	0.811626	1344.66	18.0336	1344.66
AcG-03x_m67_002	AcG	AcG-03x_m67_002.xlsx_RoiSetAuto-30.zip Distance px	60	21361.6	0.911857	1344.66	15.8863	1344.66
AcG-03x_m67_002	AcG	AcG-03x_m67_002.xlsx_RoiSetAuto-31.zip Distance px	92	17274.4	0.745695	1344.66	12.8467	1344.66
AcG-03x_m67_002	AcG	AcG-03x_m67_002.xlsx_RoiSetAuto-32.zip Distance px	16	17024.4	0.293385	1344.66	12.6608	1344.66
AcG-03x_m67_002	AcG	AcG-03x_m67_002.xlsx_RoiSetAuto-33.zip Distance px	84	19558.8	0.805618	1344.66	14.5456	1344.66
AcG-03x_m67_002	AcG	AcG-03x_m67_002.xlsx_RoiSetAuto-34.zip Distance px	24	22106.1	0.314983	1344.66	16.4399	1344.66
AcG-03x_m67_002	AcG	AcG-03x_m67_002.xlsx_RoiSetAuto-35.zip Distance px	52	22762.4	0.795266	1344.66	16.928	1344.66
AcG-03x_m67_002	AcG	AcG-03x_m67_002.xlsx_RoiSetAuto-36.zip Distance px	20	13346.4	0.223966	1344.66	9.92552	1344.66
AcG-03x_m67_002	AcG	AcG-03x_m67_002.xlsx_RoiSetAuto-37.zip Distance px	156	27675.1	1.61564	1344.66	20.5816	1344.66
AcG-03x_m67_002	AcG	AcG-03x_m67_002.xlsx_RoiSetAuto-38.zip Distance px	32	15335.9	0.473791	1344.66	11.405	1344.66
AcG-03x_m67_002	AcG	AcG-03x_m67_002.xlsx_RoiSetAuto-39.zip Distance px	108	23061.1	0.497395	1344.66	17.1502	1344.66
AcG-03x_m67_002	AcG	AcG-03x_m67_002.xlsx_RoiSetAuto-4.zip Distance px	68	23611.2	0.631061	1344.66	17.5593	1344.66
AcG-03x_m67_002	AcG	AcG-03x_m67_002.xlsx_RoiSetAuto-40.zip Distance px	28	20556.8	0.738508	1344.66	15.2878	1344.66
AcG-03x_m67_002	AcG	AcG-03x_m67_002.xlsx_RoiSetAuto-41.zip Distance px	20	9803.89	0.500289	1344.66	7.291	1344.66
AcG-03x_m67_002	AcG	AcG-03x_m67_002.xlsx_RoiSetAuto-42.zip Distance px	96	24318.8	0.818042	1344.66	18.0855	1344.66
AcG-03x_m67_002	AcG	AcG-03x_m67_002.xlsx_RoiSetAuto-43.zip Distance px	24	13648.6	0.301075	1344.66	10.1502	1344.66
AcG-03x_m67_002	AcG	AcG-03x_m67_002.xlsx_RoiSetAuto-44.zip Distance px	20	13199.2	0.278604	1344.66	9.81603	1344.66
AcG-03x_m67_002	AcG	AcG-03x_m67_002.xlsx_RoiSetAuto-45.zip Distance px	72	19426	0.880942	1344.66	14.4468	1344.66
AcG-03x_m67_002	AcG	AcG-03x_m67_002.xlsx_RoiSetAuto-46.zip Distance px	20	20061.6	0.191511	1344.66	14.9195	1344.66
AcG-03x_m67_002	AcG	AcG-03x_m67_002.xlsx_RoiSetAuto-47.zip Distance px	36	17615.6	0.395317	1344.66	13.1005	1344.66
AcG-03x_m67_002	AcG	AcG-03x_m67_002.xlsx_RoiSetAuto-49.zip Distance px	112	21484.8	0.655523	1344.66	15.9779	1344.66
AcG-03x_m67_002	AcG	AcG-03x_m67_002.xlsx_RoiSetAuto-5.zip Distance px	60	21445.1	0.925106	1344.66	15.9484	1344.66
AcG-03x_m67_002	AcG	AcG-03x_m67_002.xlsx_RoiSetAuto-50.zip Distance px	20	15111.8	0.128548	1344.66	11.2384	1344.66
AcG-03x_m67_002	AcG	AcG-03x_m67_002.xlsx_RoiSetAuto-51.zip Distance px	72	23433.5	0.829475	1344.66	17.4272	1344.66
AcG-03x_m67_002	AcG	AcG-03x_m67_002.xlsx_RoiSetAuto-52.zip Distance px	24	15560.7	0.347533	1344.66	11.5723	1344.66
AcG-03x_m67_002	AcG	AcG-03x_m67_002.xlsx_RoiSetAuto-53.zip Distance px	20	18830.7	0.591289	1344.66	14.0041	1344.66
AcG-03x_m67_002	AcG	AcG-03x_m67_002.xlsx_RoiSetAuto-54.zip Distance px	28	18672	0.315619	1344.66	13.8861	1344.66
AcG-03x_m67_002	AcG	AcG-03x_m67_002.xlsx_RoiSetAuto-55.zip Distance px	24	14300.3	0.323572	1344.66	10.6349	1344.66
AcG-03x_m67_002	AcG	AcG-03x_m67_002.xlsx_RoiSetAuto-56.zip Distance px	76	26489.6	0.787657	1344.66	19.6999	1344.66
AcG-03x_m67_002	AcG	AcG-03x_m67_002.xlsx_RoiSetAuto-57.zip Distance px	16	18313.4	0.266262	1344.66	13.6194	1344.66
AcG-03x_m67_002	AcG	AcG-03x_m67_002.xlsx_RoiSetAuto-58.zip Distance px	52	17626.1	0.573931	1344.66	13.1083	1344.66
AcG-03x_m67_002	AcG	AcG-03x_m67_002.xlsx_RoiSetAuto-59.zip Distance px	20	15026.7	0.127629	1344.66	11.1751	1344.66
AcG-03x_m67_002	AcG	AcG-03x_m67_002.xlsx_RoiSetAuto-6.zip Distance px	196	22743	0.761778	1344.66	16.9136	1344.66
AcG-03x_m67_002	AcG	AcG-03x_m67_002.xlsx_RoiSetAuto-60.zip Distance px	56	15846.7	0.598308	1344.66	11.7849	1344.66
AcG-03x_m67_002	AcG	AcG-03x_m67_002.xlsx_RoiSetAuto-61.zip Distance px	16	15119.2	0.187183	1344.66	11.2439	1344.66
AcG-03x_m67_002	AcG	AcG-03x_m67_002.xlsx_RoiSetAuto-62.zip Distance px	24	17025	0.385402	1344.66	12.6612	1344.66
AcG-03x_m67_002	AcG	AcG-03x_m67_002.xlsx_RoiSetAuto-63.zip Distance px	20	24688.6	0.304367	1344.66	18.3605	1344.66
AcG-03x_m67_002	AcG	AcG-03x_m67_002.xlsx_RoiSetAuto-64.zip Distance px	28	18946.3	0.603011	1344.66	14.0901	1344.66
AcG-03x_m67_002	AcG	AcG-03x_m67_002.xlsx_RoiSetAuto-65.zip Distance px	32	26648.3	0.613248	1344.66	19.8179	1344.66
AcG-03x_m67_002	AcG	AcG-03x_m67_002.xlsx_RoiSetAuto-66.zip Distance px	20	21883.4	1.0275	1344.66	16.2743	1344.66
AcG-03x_m67_002	AcG	AcG-03x_m67_002.xlsx_RoiSetAuto-67.zip Distance px	16	13965.9	0.257874	1344.66	10.3862	1344.66
AcG-03x_m67_002	AcG	AcG-03x_m67_002.xlsx_RoiSetAuto-68.zip Distance px	16	18031.7	0.389453	1344.66	13.4099	1344.66
AcG-03x_m67_002	AcG	AcG-03x_m67_002.xlsx_RoiSetAuto-7.zip Distance px	20	12636.3	0.363252	1344.66	9.39742	1344.66
AcG-03x_m67_002	AcG	AcG-03x_m67_002.xlsx_RoiSetAuto-8.zip Distance px	16	12103.2	0.352096	1344.66	9.00094	1344.66
AcG-03x_m67_002	AcG	AcG-03x_m67_002.xlsx_RoiSetAuto-9.zip Distance px	28	13904.2	0.511631	1344.66	10.3403	1344.66
AcG-03x_m67_003	AcG	AcG-03x_m67_003.xlsx_RoiSetAuto-11.zip Distance px	128	24317.6	0.700301	1545.02	15.7394	1545.02
AcG-03x_m67_003	AcG	AcG-03x_m67_003.xlsx_RoiSetAuto-12.zip Distance px	144	33633.4	1.14051	1545.02	21.7689	1545.02
AcG-03x_m67_003	AcG	AcG-03x_m67_003.xlsx_RoiSetAuto-13.zip Distance px	24	16429.2	0.293817	1545.02	10.6337	1545.02
AcG-03x_m67_003	AcG	AcG-03x_m67_003.xlsx_RoiSetAuto-14.zip Distance px	140	22909.5	0.899563	1545.02	14.828	1545.02
AcG-03x_m67_003	AcG	AcG-03x_m67_003.xlsx_RoiSetAuto-2.zip Distance px	32	18116.4	0.398055	1545.02	11.7257	1545.02
AcG-03x_m67_003	AcG	AcG-03x_m67_003.xlsx_RoiSetAuto-23.zip Distance px	124	26610	0.931425	1545.02	17.2231	1545.02
AcG-03x_m67_003	AcG	AcG-03x_m67_003.xlsx_RoiSetAuto-24.zip Distance px	28	19283.1	0.609631	1545.02	12.4809	1545.02
AcG-03x_m67_003	AcG	AcG-03x_m67_003.xlsx_RoiSetAuto-26.zip Distance px	16	16104.6	0.25357	1545.02	10.4236	1545.02
AcG-03x_m67_003	AcG	AcG-03x_m67_003.xlsx_RoiSetAuto-3.zip Distance px	36	24344.4	0.491874	1545.02	15.7567	1545.02
AcG-03x_m67_003	AcG	AcG-03x_m67_003.xlsx_RoiSetAuto-30.zip Distance px	24	18969.7	0.460673	1545.02	12.278	1545.02
AcG-03x_m67_003	AcG	AcG-03x_m67_003.xlsx_RoiSetAuto-32.zip Distance px	36	20599.6	0.687768	1545.02	13.3329	1545.02
AcG-03x_m67_003	AcG	AcG-03x_m67_003.xlsx_RoiSetAuto-33.zip Distance px	28	19656	0.223836	1545.02	12.7222	1545.02
AcG-03x_m67_003	AcG	AcG-03x_m67_003.xlsx_RoiSetAuto-34.zip Distance px	36	21503.8	0.536375	1545.02	13.9181	1545.02
AcG-03x_m67_003	AcG	AcG-03x_m67_003.xlsx_RoiSetAuto-35.zip Distance px	20	17368	0.166759	1545.02	11.2413	1545.02
AcG-03x_m67_003	AcG	AcG-03x_m67_003.xlsx_RoiSetAuto-36.zip Distance px	20	20004	0.323386	1545.02	12.9474	1545.02
AcG-03x_m67_003	AcG	AcG-03x_m67_003.xlsx_RoiSetAuto-37.zip Distance px	28	20805.4	0.467772	1545.02	13.4661	1545.02
AcG-03x_m67_003	AcG	AcG-03x_m67_003.xlsx_RoiSetAuto-38.zip Distance px	16	19747.1	0.316211	1545.02	12.7811	1545.02
AcG-03x_m67_003	AcG	AcG-03x_m67_003.xlsx_RoiSetAuto-40.zip Distance px	16	19361.3	0.37642	1545.02	12.5314	1545.02
AcG-03x_m67_003	AcG	AcG-03x_m67_003.xlsx_RoiSetAuto-42.zip Distance px	20	19580.1	0.35781	1545.02	12.673	1545.02
AcG-03x_m67_003	AcG	AcG-03x_m67_003.xlsx_RoiSetAuto-43.zip Distance px	20	21142	0.394265	1545.02	13.684	1545.02
AcG-03x_m67_003	AcG	AcG-03x_m67_003.xlsx_RoiSetAuto-44.zip Distance px	28	20627.2	0.333625	1545.02	13.3508	1545.02
AcG-03x_m67_003	AcG	AcG-03x_m67_003.xlsx_RoiSetAuto-45.zip Distance px	80	26173.6	0.898667	1545.02	16.9406	1545.02
AcG-03x_m67_003	AcG	AcG-03x_m67_003.xlsx_RoiSetAuto-46.zip Distance px	16	18734.2	0.194593	1545.02	12.1255	1545.02
AcG-03x_m67_003	AcG	AcG-03x_m67_003.xlsx_RoiSetAuto-47.zip Distance px	44	22635.7	0.472062	1545.02	14.6507	1545.02
AcG-03x_m67_003	AcG	AcG-03x_m67_003.xlsx_RoiSetAuto-48.zip Distance px	32	23713.7	0.34162	1545.02	15.3485	1545.02
AcG-03x_m67_003	AcG	AcG-03x_m67_003.xlsx_RoiSetAuto-49.zip Distance px	24	22973.6	0.207288	1545.02	14.8695	1545.02
AcG-03x_m67_003	AcG	AcG-03x_m67_003.xlsx_RoiSetAuto-51.zip Distance px	28	19169.1	0.207001	1545.02	12.4071	1545.02
AcG-03x_m67_003	AcG	AcG-03x_m67_003.xlsx_RoiSetAuto-52.zip Distance px	32	24930.5	0.328968	1545.02	16.1361	1545.02
AcG-03x_m67_003	AcG	AcG-03x_m67_003.xlsx_RoiSetAuto-53.zip Distance px	32	20449.5	0.397147	1545.02	13.2358	1545.02
AcG-03x_m67_003	AcG	AcG-03x_m67_003.xlsx_RoiSetAuto-55.zip Distance px	16	21806.8	0.246939	1545.02	14.1143	1545.02
AcG-03x_m67_003	AcG	AcG-03x_m67_003.xlsx_RoiSetAuto-6.zip Distance px	24	30399.6	0.571768	1545.02	19.6759	1545.02
AcG-03x_m67_003	AcG	AcG-03x_m67_003.xlsx_RoiSetAuto-7.zip Distance px	100	31282.6	0.677813	1545.02	20.2474	1545.02
AcG-03x_m67_003	AcG	AcG-03x_m67_003.xlsx_RoiSetAuto-9.zip Distance px	100	21961.4	0.811871	1545.02	14.2143	1545.02
acG-05f_m67_001	acG	acG-05f_m67_001.xlsx_RoiSetAuto-1.zip Distance px	64	12543.9	0.900165	1224.81	10.2415	1224.81
acG-05f_m67_001	acG	acG-05f_m67_001.xlsx_RoiSetAuto-10.zip Distance px	28	10617.8	0.285051	1224.81	8.66894	1224.81
acG-05f_m67_001	acG	acG-05f_m67_001.xlsx_RoiSetAuto-12.zip Distance px	28	13461.4	0.759304	1224.81	10.9906	1224.81
acG-05f_m67_001	acG	acG-05f_m67_001.xlsx_RoiSetAuto-13.zip Distance px	84	24159.6	0.689081	1224.81	19.7252	1224.81
acG-05f_m67_001	acG	acG-05f_m67_001.xlsx_RoiSetAuto-14.zip Distance px	16	12844.9	0.231761	1224.81	10.4873	1224.81
acG-05f_m67_001	acG	acG-05f_m67_001.xlsx_RoiSetAuto-15.zip Distance px	24	15061.1	0.506997	1224.81	12.2967	1224.81
acG-05f_m67_001	acG	acG-05f_m67_001.xlsx_RoiSetAuto-16.zip Distance px	24	12632.7	0.177656	1224.81	10.314	1224.81
acG-05f_m67_001	acG	acG-05f_m67_001.xlsx_RoiSetAuto-17.zip Distance px	72	19385.2	0.928045	1224.81	15.8271	1224.81
acG-05f_m67_001	acG	acG-05f_m67_001.xlsx_RoiSetAuto-18.zip Distance px	20	11789.2	0.222633	1224.81	9.62532	1224.81
acG-05f_m67_001	acG	acG-05f_m67_001.xlsx_RoiSetAuto-19.zip Distance px	40	12425.2	0.414519	1224.81	10.1446	1224.81
acG-05f_m67_001	acG	acG-05f_m67_001.xlsx_RoiSetAuto-20.zip Distance px	28	15038.9	0.539389	1224.81	12.2786	1224.81
acG-05f_m67_001	acG	acG-05f_m67_001.xlsx_RoiSetAuto-21.zip Distance px	36	22467.2	0.597366	1224.81	18.3434	1224.81
acG-05f_m67_001	acG	acG-05f_m67_001.xlsx_RoiSetAuto-22.zip Distance px	96	15593.7	0.63096	1224.81	12.7315	1224.81
acG-05f_m67_001	acG	acG-05f_m67_001.xlsx_RoiSetAuto-23.zip Distance px	20	21273.5	0.718894	1224.81	17.3688	1224.81
acG-05f_m67_001	acG	acG-05f_m67_001.xlsx_RoiSetAuto-24.zip Distance px	36	14154.4	0.316597	1224.81	11.5565	1224.81
acG-05f_m67_001	acG	acG-05f_m67_001.xlsx_RoiSetAuto-25.zip Distance px	20	12854.1	0.21916	1224.81	10.4948	1224.81
acG-05f_m67_001	acG	acG-05f_m67_001.xlsx_RoiSetAuto-26.zip Distance px	20	12997.5	0.225701	1224.81	10.6119	1224.81
acG-05f_m67_001	acG	acG-05f_m67_001.xlsx_RoiSetAuto-27.zip Distance px	140	44669.2	0.708743	1224.81	36.4704	1224.81
acG-05f_m67_001	acG	acG-05f_m67_001.xlsx_RoiSetAuto-28.zip Distance px	28	19580.8	0.657879	1224.81	15.9869	1224.81
acG-05f_m67_001	acG	acG-05f_m67_001.xlsx_RoiSetAuto-29.zip Distance px	20	14962.5	0.445455	1224.81	12.2162	1224.81
acG-05f_m67_001	acG	acG-05f_m67_001.xlsx_RoiSetAuto-30.zip Distance px	36	16629.7	0.719332	1224.81	13.5774	1224.81
acG-05f_m67_001	acG	acG-05f_m67_001.xlsx_RoiSetAuto-31.zip Distance px	44	14335.1	0.638244	1224.81	11.7039	1224.81
acG-05f_m67_001	acG	acG-05f_m67_001.xlsx_RoiSetAuto-33.zip Distance px	24	13487.3	0.504065	1224.81	11.0118	1224.81
acG-05f_m67_001	acG	acG-05f_m67_001.xlsx_RoiSetAuto-34.zip Distance px	16	13988.8	0.073772	1224.81	11.4212	1224.81
acG-05f_m67_001	acG	acG-05f_m67_001.xlsx_RoiSetAuto-35.zip Distance px	40	23559.5	0.853989	1224.81	19.2353	1224.81
acG-05f_m67_001	acG	acG-05f_m67_001.xlsx_RoiSetAuto-36.zip Distance px	48	20095.4	0.696223	1224.81	16.407	1224.81
acG-05f_m67_001	acG	acG-05f_m67_001.xlsx_RoiSetAuto-37.zip Distance px	24	17174.2	0.397486	1224.81	14.0219	1224.81
acG-05f_m67_001	acG	acG-05f_m67_001.xlsx_RoiSetAuto-38.zip Distance px	56	16777.9	0.67122	1224.81	13.6984	1224.81
acG-05f_m67_001	acG	acG-05f_m67_001.xlsx_RoiSetAuto-39.zip Distance px	32	19490.6	0.515684	1224.81	15.9132	1224.81
acG-05f_m67_001	acG	acG-05f_m67_001.xlsx_RoiSetAuto-4.zip Distance px	80	19765.1	1.11596	1224.81	16.1373	1224.81
acG-05f_m67_001	acG	acG-05f_m67_001.xlsx_RoiSetAuto-40.zip Distance px	16	13543.9	0.170143	1224.81	11.058	1224.81
acG-05f_m67_001	acG	acG-05f_m67_001.xlsx_RoiSetAuto-41.zip Distance px	24	21914.7	0.420299	1224.81	17.8923	1224.81
acG-05f_m67_001	acG	acG-05f_m67_001.xlsx_RoiSetAuto-42.zip Distance px	40	26534.3	0.593629	1224.81	21.6641	1224.81
acG-05f_m67_001	acG	acG-05f_m67_001.xlsx_RoiSetAuto-43.zip Distance px	36	19130.7	1.16961	1224.81	15.6194	1224.81
acG-05f_m67_001	acG	acG-05f_m67_001.xlsx_RoiSetAuto-44.zip Distance px	20	16606	0.479515	1224.81	13.558	1224.81
acG-05f_m67_001	acG	acG-05f_m67_001.xlsx_RoiSetAuto-45.zip Distance px	28	20868.7	0.164299	1224.81	17.0384	1224.81
acG-05f_m67_001	acG	acG-05f_m67_001.xlsx_RoiSetAuto-46.zip Distance px	28	23657.6	0.753779	1224.81	19.3153	1224.81
acG-05f_m67_001	acG	acG-05f_m67_001.xlsx_RoiSetAuto-47.zip Distance px	24	18229.7	0.203295	1224.81	14.8837	1224.81
acG-05f_m67_001	acG	acG-05f_m67_001.xlsx_RoiSetAuto-48.zip Distance px	16	13465.4	0.15754	1224.81	10.9939	1224.81
acG-05f_m67_001	acG	acG-05f_m67_001.xlsx_RoiSetAuto-49.zip Distance px	16	17712.8	0.447602	1224.81	14.4617	1224.81
acG-05f_m67_001	acG	acG-05f_m67_001.xlsx_RoiSetAuto-5.zip Distance px	156	17932.3	0.955431	1224.81	14.6409	1224.81
acG-05f_m67_001	acG	acG-05f_m67_001.xlsx_RoiSetAuto-6.zip Distance px	112	17916.1	1.17351	1224.81	14.6277	1224.81
acG-05f_m67_001	acG	acG-05f_m67_001.xlsx_RoiSetAuto-7.zip Distance px	48	38859.7	1.3038	1224.81	31.7272	1224.81
acG-05f_m67_001	acG	acG-05f_m67_001.xlsx_RoiSetAuto-8.zip Distance px	16	16088.6	0.543636	1224.81	13.1356	1224.81
acG-05f_m67_001	acG	acG-05f_m67_001.xlsx_RoiSetAuto-9.zip Distance px	20	10264.1	0.258213	1224.81	8.38017	1224.81
acG-05f_m67_002	acG	acG-05f_m67_002.xlsx_RoiSetAuto-1.zip Distance px	76	7467.82	0.655083	838.043	8.91102	838.043
acG-05f_m67_002	acG	acG-05f_m67_002.xlsx_RoiSetAuto-10.zip Distance px	36	15464.8	1.09554	838.043	18.4534	838.043
acG-05f_m67_002	acG	acG-05f_m67_002.xlsx_RoiSetAuto-100.zip Distance px	24	13214	0.352716	838.043	15.7676	838.043
acG-05f_m67_002	acG	acG-05f_m67_002.xlsx_RoiSetAuto-101.zip Distance px	32	12357.1	0.63359	838.043	14.7452	838.043
acG-05f_m67_002	acG	acG-05f_m67_002.xlsx_RoiSetAuto-102.zip Distance px	20	11708.8	0.295455	838.043	13.9716	838.043
acG-05f_m67_002	acG	acG-05f_m67_002.xlsx_RoiSetAuto-103.zip Distance px	32	10853.9	0.446769	838.043	12.9515	838.043
acG-05f_m67_002	acG	acG-05f_m67_002.xlsx_RoiSetAuto-104.zip Distance px	24	12420.4	0.78567	838.043	14.8207	838.043
acG-05f_m67_002	acG	acG-05f_m67_002.xlsx_RoiSetAuto-105.zip Distance px	20	11920.5	0.513898	838.043	14.2242	838.043
acG-05f_m67_002	acG	acG-05f_m67_002.xlsx_RoiSetAuto-106.zip Distance px	20	11232.4	0.263264	838.043	13.4032	838.043
acG-05f_m67_002	acG	acG-05f_m67_002.xlsx_RoiSetAuto-11.zip Distance px	64	25287.3	1.20729	838.043	30.1742	838.043
acG-05f_m67_002	acG	acG-05f_m67_002.xlsx_RoiSetAuto-12.zip Distance px	248	14503	0.948286	838.043	17.3058	838.043
acG-05f_m67_002	acG	acG-05f_m67_002.xlsx_RoiSetAuto-14.zip Distance px	16	10482.4	0.323066	838.043	12.5082	838.043
acG-05f_m67_002	acG	acG-05f_m67_002.xlsx_RoiSetAuto-15.zip Distance px	48	12391.3	0.72803	838.043	14.786	838.043
acG-05f_m67_002	acG	acG-05f_m67_002.xlsx_RoiSetAuto-16.zip Distance px	28	13366.5	0.726136	838.043	15.9496	838.043
acG-05f_m67_002	acG	acG-05f_m67_002.xlsx_RoiSetAuto-17.zip Distance px	36	13953.7	0.918112	838.043	16.6504	838.043
acG-05f_m67_002	acG	acG-05f_m67_002.xlsx_RoiSetAuto-18.zip Distance px	52	16000.2	1.01548	838.043	19.0923	838.043
acG-05f_m67_002	acG	acG-05f_m67_002.xlsx_RoiSetAuto-19.zip Distance px	28	9350.17	0.767739	838.043	11.1571	838.043
acG-05f_m67_002	acG	acG-05f_m67_002.xlsx_RoiSetAuto-2.zip Distance px	164	17694.9	1.35025	838.043	21.1145	838.043
acG-05f_m67_002	acG	acG-05f_m67_002.xlsx_RoiSetAuto-20.zip Distance px	68	15241.5	1.06904	838.043	18.187	838.043
acG-05f_m67_002	acG	acG-05f_m67_002.xlsx_RoiSetAuto-22.zip Distance px	48	28831.5	1.09816	838.043	34.4034	838.043
acG-05f_m67_002	acG	acG-05f_m67_002.xlsx_RoiSetAuto-23.zip Distance px	44	8306.9	0.421017	838.043	9.91226	838.043
acG-05f_m67_002	acG	acG-05f_m67_002.xlsx_RoiSetAuto-24.zip Distance px	72	16097.4	0.549997	838.043	19.2083	838.043
acG-05f_m67_002	acG	acG-05f_m67_002.xlsx_RoiSetAuto-25.zip Distance px	24	9475.38	0.66033	838.043	11.3066	838.043
acG-05f_m67_002	acG	acG-05f_m67_002.xlsx_RoiSetAuto-26.zip Distance px	36	9112.19	0.31781	838.043	10.8732	838.043
acG-05f_m67_002	acG	acG-05f_m67_002.xlsx_RoiSetAuto-27.zip Distance px	32	14122.3	0.624216	838.043	16.8515	838.043
acG-05f_m67_002	acG	acG-05f_m67_002.xlsx_RoiSetAuto-28.zip Distance px	80	13233	1.02403	838.043	15.7904	838.043
acG-05f_m67_002	acG	acG-05f_m67_002.xlsx_RoiSetAuto-29.zip Distance px	72	9984.85	0.46228	838.043	11.9145	838.043
acG-05f_m67_002	acG	acG-05f_m67_002.xlsx_RoiSetAuto-3.zip Distance px	40	10829.3	0.650232	838.043	12.9221	838.043
acG-05f_m67_002	acG	acG-05f_m67_002.xlsx_RoiSetAuto-30.zip Distance px	96	15359.5	0.659733	838.043	18.3279	838.043
acG-05f_m67_002	acG	acG-05f_m67_002.xlsx_RoiSetAuto-31.zip Distance px	100	18351.7	1.23452	838.043	21.8983	838.043
acG-05f_m67_002	acG	acG-05f_m67_002.xlsx_RoiSetAuto-32.zip Distance px	52	9760.21	0.943133	838.043	11.6464	838.043
acG-05f_m67_002	acG	acG-05f_m67_002.xlsx_RoiSetAuto-33.zip Distance px	16	9356.69	0.599499	838.043	11.1649	838.043
acG-05f_m67_002	acG	acG-05f_m67_002.xlsx_RoiSetAuto-34.zip Distance px	24	9182.33	0.784625	838.043	10.9569	838.043
acG-05f_m67_002	acG	acG-05f_m67_002.xlsx_RoiSetAuto-35.zip Distance px	16	9229.63	0.639725	838.043	11.0133	838.043
acG-05f_m67_002	acG	acG-05f_m67_002.xlsx_RoiSetAuto-36.zip Distance px	32	11991.1	0.513908	838.043	14.3085	838.043
acG-05f_m67_002	acG	acG-05f_m67_002.xlsx_RoiSetAuto-37.zip Distance px	28	10715.6	0.572248	838.043	12.7865	838.043
acG-05f_m67_002	acG	acG-05f_m67_002.xlsx_RoiSetAuto-38.zip Distance px	60	12275.1	1.10432	838.043	14.6474	838.043
acG-05f_m67_002	acG	acG-05f_m67_002.xlsx_RoiSetAuto-39.zip Distance px	16	11256.9	0.516032	838.043	13.4324	838.043
acG-05f_m67_002	acG	acG-05f_m67_002.xlsx_RoiSetAuto-4.zip Distance px	24	10222.9	0.592304	838.043	12.1985	838.043
acG-05f_m67_002	acG	acG-05f_m67_002.xlsx_RoiSetAuto-40.zip Distance px	40	16810.6	0.844259	838.043	20.0594	838.043
acG-05f_m67_002	acG	acG-05f_m67_002.xlsx_RoiSetAuto-41.zip Distance px	132	21022.5	0.623497	838.043	25.0852	838.043
acG-05f_m67_002	acG	acG-05f_m67_002.xlsx_RoiSetAuto-42.zip Distance px	32	10962	0.458015	838.043	13.0805	838.043
acG-05f_m67_002	acG	acG-05f_m67_002.xlsx_RoiSetAuto-43.zip Distance px	32	10498.6	0.57526	838.043	12.5276	838.043
acG-05f_m67_002	acG	acG-05f_m67_002.xlsx_RoiSetAuto-44.zip Distance px	48	11070.6	0.563883	838.043	13.2101	838.043
acG-05f_m67_002	acG	acG-05f_m67_002.xlsx_RoiSetAuto-45.zip Distance px	52	9267.62	0.559257	838.043	11.0586	838.043
acG-05f_m67_002	acG	acG-05f_m67_002.xlsx_RoiSetAuto-46.zip Distance px	24	12838.3	1.20772	838.043	15.3194	838.043
acG-05f_m67_002	acG	acG-05f_m67_002.xlsx_RoiSetAuto-47.zip Distance px	20	10008.4	0.227682	838.043	11.9426	838.043
acG-05f_m67_002	acG	acG-05f_m67_002.xlsx_RoiSetAuto-48.zip Distance px	28	11417.4	0.535662	838.043	13.6239	838.043
acG-05f_m67_002	acG	acG-05f_m67_002.xlsx_RoiSetAuto-5.zip Distance px	36	10278.8	0.686999	838.043	12.2653	838.043
acG-05f_m67_002	acG	acG-05f_m67_002.xlsx_RoiSetAuto-50.zip Distance px	20	8465.24	0.420992	838.043	10.1012	838.043
acG-05f_m67_002	acG	acG-05f_m67_002.xlsx_RoiSetAuto-52.zip Distance px	64	17032.3	1.13272	838.043	20.3239	838.043
acG-05f_m67_002	acG	acG-05f_m67_002.xlsx_RoiSetAuto-53.zip Distance px	48	11574.9	0.582669	838.043	13.8118	838.043
acG-05f_m67_002	acG	acG-05f_m67_002.xlsx_RoiSetAuto-55.zip Distance px	168	13805.4	0.895893	838.043	16.4733	838.043
acG-05f_m67_002	acG	acG-05f_m67_002.xlsx_RoiSetAuto-56.zip Distance px	20	11770.5	0.560724	838.043	14.0453	838.043
acG-05f_m67_002	acG	acG-05f_m67_002.xlsx_RoiSetAuto-57.zip Distance px	24	8385.5	0.460813	838.043	10.006	838.043
acG-05f_m67_002	acG	acG-05f_m67_002.xlsx_RoiSetAuto-58.zip Distance px	16	7753.88	0.368989	838.043	9.25237	838.043
acG-05f_m67_002	acG	acG-05f_m67_002.xlsx_RoiSetAuto-59.zip Distance px	24	10034	0.489929	838.043	11.9731	838.043
acG-05f_m67_002	acG	acG-05f_m67_002.xlsx_RoiSetAuto-60.zip Distance px	32	8907.89	0.273476	838.043	10.6294	838.043
acG-05f_m67_002	acG	acG-05f_m67_002.xlsx_RoiSetAuto-61.zip Distance px	92	11281.5	0.970553	838.043	13.4617	838.043
acG-05f_m67_002	acG	acG-05f_m67_002.xlsx_RoiSetAuto-62.zip Distance px	16	9404.76	0.330767	838.043	11.2223	838.043
acG-05f_m67_002	acG	acG-05f_m67_002.xlsx_RoiSetAuto-63.zip Distance px	88	13361.9	0.887755	838.043	15.9442	838.043
acG-05f_m67_002	acG	acG-05f_m67_002.xlsx_RoiSetAuto-64.zip Distance px	16	8478.44	0.690202	838.043	10.1169	838.043
acG-05f_m67_002	acG	acG-05f_m67_002.xlsx_RoiSetAuto-65.zip Distance px	24	8669.18	0.307358	838.043	10.3446	838.043
acG-05f_m67_002	acG	acG-05f_m67_002.xlsx_RoiSetAuto-66.zip Distance px	36	9789.73	0.415366	838.043	11.6817	838.043
acG-05f_m67_002	acG	acG-05f_m67_002.xlsx_RoiSetAuto-67.zip Distance px	16	7536.6	0.100401	838.043	8.9931	838.043
acG-05f_m67_002	acG	acG-05f_m67_002.xlsx_RoiSetAuto-69.zip Distance px	76	12209	0.609196	838.043	14.5684	838.043
acG-05f_m67_002	acG	acG-05f_m67_002.xlsx_RoiSetAuto-7.zip Distance px	32	14348.4	0.788582	838.043	17.1213	838.043
acG-05f_m67_002	acG	acG-05f_m67_002.xlsx_RoiSetAuto-71.zip Distance px	92	18101.5	1.01014	838.043	21.5997	838.043
acG-05f_m67_002	acG	acG-05f_m67_002.xlsx_RoiSetAuto-72.zip Distance px	20	7840.37	0.155176	838.043	9.35557	838.043
acG-05f_m67_002	acG	acG-05f_m67_002.xlsx_RoiSetAuto-74.zip Distance px	24	10246	0.502397	838.043	12.2261	838.043
acG-05f_m67_002	acG	acG-05f_m67_002.xlsx_RoiSetAuto-75.zip Distance px	20	8556.04	0.571048	838.043	10.2095	838.043
acG-05f_m67_002	acG	acG-05f_m67_002.xlsx_RoiSetAuto-76.zip Distance px	60	15998.7	0.711644	838.043	19.0905	838.043
acG-05f_m67_002	acG	acG-05f_m67_002.xlsx_RoiSetAuto-77.zip Distance px	16	8460.54	0.264227	838.043	10.0956	838.043
acG-05f_m67_002	acG	acG-05f_m67_002.xlsx_RoiSetAuto-78.zip Distance px	64	15930.7	0.840625	838.043	19.0094	838.043
acG-05f_m67_002	acG	acG-05f_m67_002.xlsx_RoiSetAuto-79.zip Distance px	24	11020.4	0.435604	838.043	13.1502	838.043
acG-05f_m67_002	acG	acG-05f_m67_002.xlsx_RoiSetAuto-8.zip Distance px	48	11526.6	0.555688	838.043	13.7542	838.043
acG-05f_m67_002	acG	acG-05f_m67_002.xlsx_RoiSetAuto-80.zip Distance px	20	11904.6	0.296508	838.043	14.2053	838.043
acG-05f_m67_002	acG	acG-05f_m67_002.xlsx_RoiSetAuto-81.zip Distance px	88	22551.6	0.907847	838.043	26.9098	838.043
acG-05f_m67_002	acG	acG-05f_m67_002.xlsx_RoiSetAuto-82.zip Distance px	88	11272.5	0.776661	838.043	13.451	838.043
acG-05f_m67_002	acG	acG-05f_m67_002.xlsx_RoiSetAuto-83.zip Distance px	32	10646.3	0.437064	838.043	12.7038	838.043
acG-05f_m67_002	acG	acG-05f_m67_002.xlsx_RoiSetAuto-84.zip Distance px	24	9851.62	0.356924	838.043	11.7555	838.043
acG-05f_m67_002	acG	acG-05f_m67_002.xlsx_RoiSetAuto-85.zip Distance px	64	11283.4	0.718483	838.043	13.464	838.043
acG-05f_m67_002	acG	acG-05f_m67_002.xlsx_RoiSetAuto-86.zip Distance px	28	8545.21	0.384094	838.043	10.1966	838.043
acG-05f_m67_002	acG	acG-05f_m67_002.xlsx_RoiSetAuto-87.zip Distance px	16	11372.4	0.468544	838.043	13.5702	838.043
acG-05f_m67_002	acG	acG-05f_m67_002.xlsx_RoiSetAuto-88.zip Distance px	28	10551.2	0.392238	838.043	12.5903	838.043
acG-05f_m67_002	acG	acG-05f_m67_002.xlsx_RoiSetAuto-89.zip Distance px	60	14519.7	0.735378	838.043	17.3257	838.043
acG-05f_m67_002	acG	acG-05f_m67_002.xlsx_RoiSetAuto-9.zip Distance px	76	13802.8	0.872469	838.043	16.4702	838.043
acG-05f_m67_002	acG	acG-05f_m67_002.xlsx_RoiSetAuto-90.zip Distance px	16	7957.08	0.169776	838.043	9.49483	838.043
acG-05f_m67_002	acG	acG-05f_m67_002.xlsx_RoiSetAuto-91.zip Distance px	60	13843.2	0.725587	838.043	16.5185	838.043
acG-05f_m67_002	acG	acG-05f_m67_002.xlsx_RoiSetAuto-94.zip Distance px	44	15014.1	1.00146	838.043	17.9157	838.043
acG-05f_m67_002	acG	acG-05f_m67_002.xlsx_RoiSetAuto-95.zip Distance px	40	14854.9	0.757702	838.043	17.7258	838.043
acG-05f_m67_002	acG	acG-05f_m67_002.xlsx_RoiSetAuto-96.zip Distance px	44	15400.7	0.735967	838.043	18.377	838.043
acG-05f_m67_002	acG	acG-05f_m67_002.xlsx_RoiSetAuto-97.zip Distance px	48	13176.4	0.61958	838.043	15.7228	838.043
acG-05f_m67_002	acG	acG-05f_m67_002.xlsx_RoiSetAuto-98.zip Distance px	44	11855	0.448869	838.043	14.1461	838.043
acG-05f_m67_002	acG	acG-05f_m67_002.xlsx_RoiSetAuto-99.zip Distance px	24	12267.5	0.359282	838.043	14.6382	838.043
acG-05f_m67_003	acG	acG-05f_m67_003.xlsx_RoiSetAuto-1.zip Distance px	68	15639.7	0.721193	784.093	19.9463	784.093
acG-05f_m67_003	acG	acG-05f_m67_003.xlsx_RoiSetAuto-11.zip Distance px	152	16720.8	1.1122	784.093	21.325	784.093
acG-05f_m67_003	acG	acG-05f_m67_003.xlsx_RoiSetAuto-13.zip Distance px	76	9694.5	0.875923	784.093	12.364	784.093
acG-05f_m67_003	acG	acG-05f_m67_003.xlsx_RoiSetAuto-14.zip Distance px	276	15309.1	0.978348	784.093	19.5245	784.093
acG-05f_m67_003	acG	acG-05f_m67_003.xlsx_RoiSetAuto-15.zip Distance px	100	12480.8	0.887348	784.093	15.9174	784.093
acG-05f_m67_003	acG	acG-05f_m67_003.xlsx_RoiSetAuto-16.zip Distance px	56	11805.9	0.8624	784.093	15.0568	784.093
acG-05f_m67_003	acG	acG-05f_m67_003.xlsx_RoiSetAuto-17.zip Distance px	64	11352.6	1.02894	784.093	14.4786	784.093
acG-05f_m67_003	acG	acG-05f_m67_003.xlsx_RoiSetAuto-18.zip Distance px	20	8879.17	0.285064	784.093	11.3241	784.093
acG-05f_m67_003	acG	acG-05f_m67_003.xlsx_RoiSetAuto-19.zip Distance px	16	8478.6	0.283508	784.093	10.8133	784.093
acG-05f_m67_003	acG	acG-05f_m67_003.xlsx_RoiSetAuto-2.zip Distance px	36	8549.99	0.4122	784.093	10.9043	784.093
acG-05f_m67_003	acG	acG-05f_m67_003.xlsx_RoiSetAuto-20.zip Distance px	100	9849.11	0.813577	784.093	12.5611	784.093
acG-05f_m67_003	acG	acG-05f_m67_003.xlsx_RoiSetAuto-22.zip Distance px	84	13538.3	0.775375	784.093	17.2662	784.093
acG-05f_m67_003	acG	acG-05f_m67_003.xlsx_RoiSetAuto-23.zip Distance px	16	7777.86	0.230283	784.093	9.91955	784.093
acG-05f_m67_003	acG	acG-05f_m67_003.xlsx_RoiSetAuto-24.zip Distance px	36	8289.18	0.40773	784.093	10.5717	784.093
acG-05f_m67_003	acG	acG-05f_m67_003.xlsx_RoiSetAuto-27.zip Distance px	56	12516.5	0.796621	784.093	15.9631	784.093
acG-05f_m67_003	acG	acG-05f_m67_003.xlsx_RoiSetAuto-28.zip Distance px	36	7507.46	0.531953	784.093	9.5747	784.093
acG-05f_m67_003	acG	acG-05f_m67_003.xlsx_RoiSetAuto-29.zip Distance px	20	7806.61	0.269482	784.093	9.95623	784.093
acG-05f_m67_003	acG	acG-05f_m67_003.xlsx_RoiSetAuto-3.zip Distance px	96	11980.9	1.0862	784.093	15.2799	784.093
acG-05f_m67_003	acG	acG-05f_m67_003.xlsx_RoiSetAuto-30.zip Distance px	72	13448.3	1.19356	784.093	17.1513	784.093
acG-05f_m67_003	acG	acG-05f_m67_003.xlsx_RoiSetAuto-31.zip Distance px	28	8790.48	0.45661	784.093	11.211	784.093
acG-05f_m67_003	acG	acG-05f_m67_003.xlsx_RoiSetAuto-33.zip Distance px	32	10095.1	0.769392	784.093	12.8749	784.093
acG-05f_m67_003	acG	acG-05f_m67_003.xlsx_RoiSetAuto-34.zip Distance px	16	8549.7	0.313025	784.093	10.9039	784.093
acG-05f_m67_003	acG	acG-05f_m67_003.xlsx_RoiSetAuto-38.zip Distance px	24	8918.04	0.268277	784.093	11.3737	784.093
acG-05f_m67_003	acG	acG-05f_m67_003.xlsx_RoiSetAuto-4.zip Distance px	24	8121.79	0.39407	784.093	10.3582	784.093
acG-05f_m67_003	acG	acG-05f_m67_003.xlsx_RoiSetAuto-40.zip Distance px	64	10553.4	0.561309	784.093	13.4593	784.093
acG-05f_m67_003	acG	acG-05f_m67_003.xlsx_RoiSetAuto-41.zip Distance px	20	8266.67	0.324702	784.093	10.543	784.093
acG-05f_m67_003	acG	acG-05f_m67_003.xlsx_RoiSetAuto-42.zip Distance px	124	13041.2	0.974742	784.093	16.6322	784.093
acG-05f_m67_003	acG	acG-05f_m67_003.xlsx_RoiSetAuto-43.zip Distance px	40	8761.4	0.504165	784.093	11.1739	784.093
acG-05f_m67_003	acG	acG-05f_m67_003.xlsx_RoiSetAuto-45.zip Distance px	32	8193.87	0.521507	784.093	10.4501	784.093
acG-05f_m67_003	acG	acG-05f_m67_003.xlsx_RoiSetAuto-46.zip Distance px	16	7648.81	0.252317	784.093	9.75498	784.093
acG-05f_m67_003	acG	acG-05f_m67_003.xlsx_RoiSetAuto-47.zip Distance px	16	8095.46	0.432732	784.093	10.3246	784.093
acG-05f_m67_003	acG	acG-05f_m67_003.xlsx_RoiSetAuto-48.zip Distance px	36	10669.7	0.565204	784.093	13.6077	784.093
acG-05f_m67_003	acG	acG-05f_m67_003.xlsx_RoiSetAuto-49.zip Distance px	44	13873.8	0.861358	784.093	17.6941	784.093
acG-05f_m67_003	acG	acG-05f_m67_003.xlsx_RoiSetAuto-5.zip Distance px	68	10026.1	0.767918	784.093	12.7869	784.093
acG-05f_m67_003	acG	acG-05f_m67_003.xlsx_RoiSetAuto-50.zip Distance px	24	8918.66	0.778647	784.093	11.3745	784.093
acG-05f_m67_003	acG	acG-05f_m67_003.xlsx_RoiSetAuto-51.zip Distance px	16	9115.13	0.189346	784.093	11.6251	784.093
acG-05f_m67_003	acG	acG-05f_m67_003.xlsx_RoiSetAuto-56.zip Distance px	40	10168.7	0.657081	784.093	12.9687	784.093
acG-05f_m67_003	acG	acG-05f_m67_003.xlsx_RoiSetAuto-57.zip Distance px	48	10994.7	0.774519	784.093	14.0222	784.093
acG-05f_m67_003	acG	acG-05f_m67_003.xlsx_RoiSetAuto-60.zip Distance px	100	15031.1	1.04337	784.093	19.1701	784.093
acG-05f_m67_003	acG	acG-05f_m67_003.xlsx_RoiSetAuto-61.zip Distance px	20	10108	0.303883	784.093	12.8914	784.093
acG-05f_m67_003	acG	acG-05f_m67_003.xlsx_RoiSetAuto-62.zip Distance px	84	14725.4	0.86121	784.093	18.7802	784.093
acG-05f_m67_003	acG	acG-05f_m67_003.xlsx_RoiSetAuto-63.zip Distance px	20	7342.65	0.161504	784.093	9.36451	784.093
acG-05f_m67_003	acG	acG-05f_m67_003.xlsx_RoiSetAuto-64.zip Distance px	20	8788.61	0.209476	784.093	11.2086	784.093
acG-05f_m67_003	acG	acG-05f_m67_003.xlsx_RoiSetAuto-66.zip Distance px	72	10862	0.805431	784.093	13.8529	784.093
acG-05f_m67_003	acG	acG-05f_m67_003.xlsx_RoiSetAuto-67.zip Distance px	48	11272.2	0.564217	784.093	14.3761	784.093
acG-05f_m67_003	acG	acG-05f_m67_003.xlsx_RoiSetAuto-68.zip Distance px	68	9396.8	0.610356	784.093	11.9843	784.093
acG-05f_m67_003	acG	acG-05f_m67_003.xlsx_RoiSetAuto-69.zip Distance px	20	9111.99	0.231962	784.093	11.6211	784.093
acG-05f_m67_003	acG	acG-05f_m67_003.xlsx_RoiSetAuto-7.zip Distance px	20	8614.57	0.424427	784.093	10.9867	784.093
acG-05f_m67_003	acG	acG-05f_m67_003.xlsx_RoiSetAuto-70.zip Distance px	40	12779.3	0.989439	784.093	16.2982	784.093
acG-05f_m67_003	acG	acG-05f_m67_003.xlsx_RoiSetAuto-72.zip Distance px	48	10383.7	0.577644	784.093	13.2429	784.093
acG-05f_m67_003	acG	acG-05f_m67_003.xlsx_RoiSetAuto-73.zip Distance px	32	11205.3	0.584011	784.093	14.2908	784.093
acG-05f_m67_003	acG	acG-05f_m67_003.xlsx_RoiSetAuto-74.zip Distance px	16	8247.71	0.508821	784.093	10.5188	784.093
acG-05f_m67_003	acG	acG-05f_m67_003.xlsx_RoiSetAuto-75.zip Distance px	92	12663.4	0.716907	784.093	16.1504	784.093
acG-05f_m67_003	acG	acG-05f_m67_003.xlsx_RoiSetAuto-76.zip Distance px	28	10297.3	0.227295	784.093	13.1327	784.093
acG-05f_m67_003	acG	acG-05f_m67_003.xlsx_RoiSetAuto-77.zip Distance px	32	10657.2	0.45145	784.093	13.5917	784.093
acG-05f_m67_003	acG	acG-05f_m67_003.xlsx_RoiSetAuto-79.zip Distance px	24	8981.39	0.426012	784.093	11.4545	784.093
acG-05f_m67_003	acG	acG-05f_m67_003.xlsx_RoiSetAuto-80.zip Distance px	20	9177.76	0.4602	784.093	11.7049	784.093
acG-05f_m67_003	acG	acG-05f_m67_003.xlsx_RoiSetAuto-81.zip Distance px	24	9831.68	0.238302	784.093	12.5389	784.093
acG-05f_m67_003	acG	acG-05f_m67_003.xlsx_RoiSetAuto-82.zip Distance px	24	11362.9	0.386598	784.093	14.4917	784.093
acG-05f_m67_003	acG	acG-05f_m67_003.xlsx_RoiSetAuto-83.zip Distance px	20	10023.4	0.326246	784.093	12.7834	784.093
acG-05f_m67_003	acG	acG-05f_m67_003.xlsx_RoiSetAuto-85.zip Distance px	20	10881.1	0.280514	784.093	13.8774	784.093
acG-05f_m67_003	acG	acG-05f_m67_003.xlsx_RoiSetAuto-86.zip Distance px	36	13259.8	0.23853	784.093	16.9109	784.093
acG-05f_m67_003	acG	acG-05f_m67_003.xlsx_RoiSetAuto-87.zip Distance px	20	11361.6	0.343394	784.093	14.4901	784.093
acG-05f_m67_003	acG	acG-05f_m67_003.xlsx_RoiSetAuto-88.zip Distance px	28	10851.5	0.391833	784.093	13.8395	784.093
acG-05f_m67_003	acG	acG-05f_m67_003.xlsx_RoiSetAuto-89.zip Distance px	28	12526.4	0.610304	784.093	15.9756	784.093
acG-05f_m67_003	acG	acG-05f_m67_003.xlsx_RoiSetAuto-90.zip Distance px	16	13156.7	0.413753	784.093	16.7796	784.093
acG-05f_m67_003	acG	acG-05f_m67_003.xlsx_RoiSetAuto-92.zip Distance px	20	10893.9	0.192686	784.093	13.8936	784.093
acG-05f_m67_003	acG	acG-05f_m67_003.xlsx_RoiSetAuto-93.zip Distance px	16	10516.2	0.178	784.093	13.412	784.093
acG-05f_m67_003	acG	acG-05f_m67_003.xlsx_RoiSetAuto-94.zip Distance px	16	10047.8	0.4972	784.093	12.8145	784.093
acG-06f_m67_001	acG	acG-06f_m67_001.xlsx_RoiSetAuto-1.zip Distance px	24	6079.3	0.395797	806.146	7.54119	806.146
acG-06f_m67_001	acG	acG-06f_m67_001.xlsx_RoiSetAuto-10.zip Distance px	20	9140.19	0.523459	806.146	11.3381	806.146
acG-06f_m67_001	acG	acG-06f_m67_001.xlsx_RoiSetAuto-11.zip Distance px	100	11903	0.567563	806.146	14.7653	806.146
acG-06f_m67_001	acG	acG-06f_m67_001.xlsx_RoiSetAuto-12.zip Distance px	56	9380.65	0.644549	806.146	11.6364	806.146
acG-06f_m67_001	acG	acG-06f_m67_001.xlsx_RoiSetAuto-13.zip Distance px	68	8340.13	0.63876	806.146	10.3457	806.146
acG-06f_m67_001	acG	acG-06f_m67_001.xlsx_RoiSetAuto-14.zip Distance px	24	10535.3	1.04209	806.146	13.0687	806.146
acG-06f_m67_001	acG	acG-06f_m67_001.xlsx_RoiSetAuto-15.zip Distance px	92	22764.2	0.993971	806.146	28.2383	806.146
acG-06f_m67_001	acG	acG-06f_m67_001.xlsx_RoiSetAuto-16.zip Distance px	124	14767.7	1.00468	806.146	18.3189	806.146
acG-06f_m67_001	acG	acG-06f_m67_001.xlsx_RoiSetAuto-17.zip Distance px	48	11950.6	0.643238	806.146	14.8243	806.146
acG-06f_m67_001	acG	acG-06f_m67_001.xlsx_RoiSetAuto-18.zip Distance px	48	9885.6	0.566844	806.146	12.2628	806.146
acG-06f_m67_001	acG	acG-06f_m67_001.xlsx_RoiSetAuto-19.zip Distance px	200	20329.1	1.05923	806.146	25.2177	806.146
acG-06f_m67_001	acG	acG-06f_m67_001.xlsx_RoiSetAuto-2.zip Distance px	136	15208.1	0.966817	806.146	18.8652	806.146
acG-06f_m67_001	acG	acG-06f_m67_001.xlsx_RoiSetAuto-20.zip Distance px	56	15592.1	0.333381	806.146	19.3415	806.146
acG-06f_m67_001	acG	acG-06f_m67_001.xlsx_RoiSetAuto-21.zip Distance px	20	13105.2	0.407452	806.146	16.2566	806.146
acG-06f_m67_001	acG	acG-06f_m67_001.xlsx_RoiSetAuto-22.zip Distance px	60	8498.5	0.698079	806.146	10.5421	806.146
acG-06f_m67_001	acG	acG-06f_m67_001.xlsx_RoiSetAuto-23.zip Distance px	52	10113.2	0.747419	806.146	12.5451	806.146
acG-06f_m67_001	acG	acG-06f_m67_001.xlsx_RoiSetAuto-24.zip Distance px	100	13569.4	0.800646	806.146	16.8324	806.146
acG-06f_m67_001	acG	acG-06f_m67_001.xlsx_RoiSetAuto-25.zip Distance px	112	13594.1	1.07743	806.146	16.8631	806.146
acG-06f_m67_001	acG	acG-06f_m67_001.xlsx_RoiSetAuto-26.zip Distance px	36	7701.17	0.425699	806.146	9.55307	806.146
acG-06f_m67_001	acG	acG-06f_m67_001.xlsx_RoiSetAuto-27.zip Distance px	60	11795.6	1.31679	806.146	14.6321	806.146
acG-06f_m67_001	acG	acG-06f_m67_001.xlsx_RoiSetAuto-28.zip Distance px	16	7362.64	0.64229	806.146	9.13314	806.146
acG-06f_m67_001	acG	acG-06f_m67_001.xlsx_RoiSetAuto-29.zip Distance px	32	9589.36	0.807926	806.146	11.8953	806.146
acG-06f_m67_001	acG	acG-06f_m67_001.xlsx_RoiSetAuto-3.zip Distance px	48	11771.6	0.616167	806.146	14.6023	806.146
acG-06f_m67_001	acG	acG-06f_m67_001.xlsx_RoiSetAuto-30.zip Distance px	72	10318.2	0.846443	806.146	12.7994	806.146
acG-06f_m67_001	acG	acG-06f_m67_001.xlsx_RoiSetAuto-31.zip Distance px	80	13040.4	0.773442	806.146	16.1763	806.146
acG-06f_m67_001	acG	acG-06f_m67_001.xlsx_RoiSetAuto-32.zip Distance px	44	11919.2	0.66588	806.146	14.7853	806.146
acG-06f_m67_001	acG	acG-06f_m67_001.xlsx_RoiSetAuto-34.zip Distance px	28	16554.2	0.373042	806.146	20.5349	806.146
acG-06f_m67_001	acG	acG-06f_m67_001.xlsx_RoiSetAuto-35.zip Distance px	16	7988.9	0.308068	806.146	9.90998	806.146
acG-06f_m67_001	acG	acG-06f_m67_001.xlsx_RoiSetAuto-36.zip Distance px	56	12526	0.872678	806.146	15.5382	806.146
acG-06f_m67_001	acG	acG-06f_m67_001.xlsx_RoiSetAuto-37.zip Distance px	84	19787.1	0.846342	806.146	24.5453	806.146
acG-06f_m67_001	acG	acG-06f_m67_001.xlsx_RoiSetAuto-38.zip Distance px	40	9915.9	0.629785	806.146	12.3004	806.146
acG-06f_m67_001	acG	acG-06f_m67_001.xlsx_RoiSetAuto-39.zip Distance px	36	9390.04	0.5072	806.146	11.6481	806.146
acG-06f_m67_001	acG	acG-06f_m67_001.xlsx_RoiSetAuto-4.zip Distance px	332	17725.8	1.22797	806.146	21.9883	806.146
acG-06f_m67_001	acG	acG-06f_m67_001.xlsx_RoiSetAuto-40.zip Distance px	40	11861.2	0.841074	806.146	14.7134	806.146
acG-06f_m67_001	acG	acG-06f_m67_001.xlsx_RoiSetAuto-42.zip Distance px	28	9040.71	0.328679	806.146	11.2147	806.146
acG-06f_m67_001	acG	acG-06f_m67_001.xlsx_RoiSetAuto-43.zip Distance px	16	10028.8	0.105326	806.146	12.4404	806.146
acG-06f_m67_001	acG	acG-06f_m67_001.xlsx_RoiSetAuto-44.zip Distance px	64	11464.2	0.533039	806.146	14.221	806.146
acG-06f_m67_001	acG	acG-06f_m67_001.xlsx_RoiSetAuto-45.zip Distance px	56	12196.2	0.603004	806.146	15.129	806.146
acG-06f_m67_001	acG	acG-06f_m67_001.xlsx_RoiSetAuto-46.zip Distance px	32	11568.9	0.861804	806.146	14.3508	806.146
acG-06f_m67_001	acG	acG-06f_m67_001.xlsx_RoiSetAuto-47.zip Distance px	44	9721.03	0.535339	806.146	12.0586	806.146
acG-06f_m67_001	acG	acG-06f_m67_001.xlsx_RoiSetAuto-48.zip Distance px	16	7918.17	0.0756528	806.146	9.82225	806.146
acG-06f_m67_001	acG	acG-06f_m67_001.xlsx_RoiSetAuto-49.zip Distance px	40	12952.9	0.753895	806.146	16.0676	806.146
acG-06f_m67_001	acG	acG-06f_m67_001.xlsx_RoiSetAuto-5.zip Distance px	28	11608.7	0.613002	806.146	14.4002	806.146
acG-06f_m67_001	acG	acG-06f_m67_001.xlsx_RoiSetAuto-50.zip Distance px	56	11254.7	0.877871	806.146	13.9611	806.146
acG-06f_m67_001	acG	acG-06f_m67_001.xlsx_RoiSetAuto-51.zip Distance px	40	11021.2	0.551152	806.146	13.6715	806.146
acG-06f_m67_001	acG	acG-06f_m67_001.xlsx_RoiSetAuto-52.zip Distance px	36	9928.97	0.273633	806.146	12.3166	806.146
acG-06f_m67_001	acG	acG-06f_m67_001.xlsx_RoiSetAuto-53.zip Distance px	24	9422.6	0.320331	806.146	11.6885	806.146
acG-06f_m67_001	acG	acG-06f_m67_001.xlsx_RoiSetAuto-54.zip Distance px	40	8223.62	0.621144	806.146	10.2012	806.146
acG-06f_m67_001	acG	acG-06f_m67_001.xlsx_RoiSetAuto-55.zip Distance px	80	11237.5	0.671744	806.146	13.9398	806.146
acG-06f_m67_001	acG	acG-06f_m67_001.xlsx_RoiSetAuto-56.zip Distance px	16	9470.55	0.58882	806.146	11.7479	806.146
acG-06f_m67_001	acG	acG-06f_m67_001.xlsx_RoiSetAuto-57.zip Distance px	92	15375.4	0.917678	806.146	19.0727	806.146
acG-06f_m67_001	acG	acG-06f_m67_001.xlsx_RoiSetAuto-58.zip Distance px	52	15318.6	0.509976	806.146	19.0023	806.146
acG-06f_m67_001	acG	acG-06f_m67_001.xlsx_RoiSetAuto-59.zip Distance px	44	13309	0.951378	806.146	16.5094	806.146
acG-06f_m67_001	acG	acG-06f_m67_001.xlsx_RoiSetAuto-6.zip Distance px	68	9888.22	0.761738	806.146	12.266	806.146
acG-06f_m67_001	acG	acG-06f_m67_001.xlsx_RoiSetAuto-60.zip Distance px	24	10909.2	0.303179	806.146	13.5326	806.146
acG-06f_m67_001	acG	acG-06f_m67_001.xlsx_RoiSetAuto-61.zip Distance px	20	8566.09	0.371902	806.146	10.626	806.146
acG-06f_m67_001	acG	acG-06f_m67_001.xlsx_RoiSetAuto-62.zip Distance px	48	8945.15	0.492158	806.146	11.0962	806.146
acG-06f_m67_001	acG	acG-06f_m67_001.xlsx_RoiSetAuto-63.zip Distance px	24	10476.9	0.349402	806.146	12.9963	806.146
acG-06f_m67_001	acG	acG-06f_m67_001.xlsx_RoiSetAuto-64.zip Distance px	52	10924.3	0.604416	806.146	13.5513	806.146
acG-06f_m67_001	acG	acG-06f_m67_001.xlsx_RoiSetAuto-65.zip Distance px	60	14228.5	0.955791	806.146	17.65	806.146
acG-06f_m67_001	acG	acG-06f_m67_001.xlsx_RoiSetAuto-66.zip Distance px	108	14816.2	0.829941	806.146	18.3791	806.146
acG-06f_m67_001	acG	acG-06f_m67_001.xlsx_RoiSetAuto-67.zip Distance px	64	11297.9	0.821705	806.146	14.0147	806.146
acG-06f_m67_001	acG	acG-06f_m67_001.xlsx_RoiSetAuto-68.zip Distance px	44	13044.9	0.55795	806.146	16.1818	806.146
acG-06f_m67_001	acG	acG-06f_m67_001.xlsx_RoiSetAuto-69.zip Distance px	92	12464	0.547262	806.146	15.4612	806.146
acG-06f_m67_001	acG	acG-06f_m67_001.xlsx_RoiSetAuto-7.zip Distance px	72	13741	0.997379	806.146	17.0453	806.146
acG-06f_m67_001	acG	acG-06f_m67_001.xlsx_RoiSetAuto-70.zip Distance px	84	22446.8	0.691434	806.146	27.8446	806.146
acG-06f_m67_001	acG	acG-06f_m67_001.xlsx_RoiSetAuto-71.zip Distance px	56	14066.7	0.719016	806.146	17.4493	806.146
acG-06f_m67_001	acG	acG-06f_m67_001.xlsx_RoiSetAuto-72.zip Distance px	16	10054	0.43564	806.146	12.4716	806.146
acG-06f_m67_001	acG	acG-06f_m67_001.xlsx_RoiSetAuto-73.zip Distance px	72	12448.2	0.772185	806.146	15.4417	806.146
acG-06f_m67_001	acG	acG-06f_m67_001.xlsx_RoiSetAuto-74.zip Distance px	20	9172.57	0.224929	806.146	11.3783	806.146
acG-06f_m67_001	acG	acG-06f_m67_001.xlsx_RoiSetAuto-75.zip Distance px	72	13428.3	0.678825	806.146	16.6574	806.146
acG-06f_m67_001	acG	acG-06f_m67_001.xlsx_RoiSetAuto-76.zip Distance px	92	14260	0.751827	806.146	17.6892	806.146
acG-06f_m67_001	acG	acG-06f_m67_001.xlsx_RoiSetAuto-77.zip Distance px	44	12496.1	0.721831	806.146	15.5011	806.146
acG-06f_m67_001	acG	acG-06f_m67_001.xlsx_RoiSetAuto-78.zip Distance px	84	20578	0.955722	806.146	25.5264	806.146
acG-06f_m67_001	acG	acG-06f_m67_001.xlsx_RoiSetAuto-79.zip Distance px	68	14074.4	1.0345	806.146	17.4589	806.146
acG-06f_m67_001	acG	acG-06f_m67_001.xlsx_RoiSetAuto-8.zip Distance px	52	13834.1	0.811088	806.146	17.1608	806.146
acG-06f_m67_001	acG	acG-06f_m67_001.xlsx_RoiSetAuto-80.zip Distance px	32	11966	0.706466	806.146	14.8435	806.146
acG-06f_m67_001	acG	acG-06f_m67_001.xlsx_RoiSetAuto-81.zip Distance px	60	11985.1	0.603908	806.146	14.8671	806.146
acG-06f_m67_001	acG	acG-06f_m67_001.xlsx_RoiSetAuto-83.zip Distance px	16	10461.7	0.144552	806.146	12.9774	806.146
acG-06f_m67_001	acG	acG-06f_m67_001.xlsx_RoiSetAuto-85.zip Distance px	16	9694.25	0.223325	806.146	12.0254	806.146
acG-06f_m67_001	acG	acG-06f_m67_001.xlsx_RoiSetAuto-86.zip Distance px	20	10089.4	0.408721	806.146	12.5156	806.146
acG-06f_m67_001	acG	acG-06f_m67_001.xlsx_RoiSetAuto-87.zip Distance px	44	11860.4	0.605064	806.146	14.7125	806.146
acG-06f_m67_001	acG	acG-06f_m67_001.xlsx_RoiSetAuto-88.zip Distance px	20	13811.7	0.405519	806.146	17.1329	806.146
acG-06f_m67_001	acG	acG-06f_m67_001.xlsx_RoiSetAuto-89.zip Distance px	20	12043.5	0.532418	806.146	14.9396	806.146
acG-06f_m67_001	acG	acG-06f_m67_001.xlsx_RoiSetAuto-90.zip Distance px	32	12895.4	0.569939	806.146	15.9964	806.146
acG-06f_m67_001	acG	acG-06f_m67_001.xlsx_RoiSetAuto-91.zip Distance px	16	12891	0.353559	806.146	15.9909	806.146
acG-06f_m67_002	acG	acG-06f_m67_002.xlsx_RoiSetAuto-10.zip Distance px	60	19179.9	1.11982	926.919	20.6921	926.919
acG-06f_m67_002	acG	acG-06f_m67_002.xlsx_RoiSetAuto-101.zip Distance px	72	14986.8	0.791077	926.919	16.1684	926.919
acG-06f_m67_002	acG	acG-06f_m67_002.xlsx_RoiSetAuto-102.zip Distance px	124	20564.5	1.46417	926.919	22.1859	926.919
acG-06f_m67_002	acG	acG-06f_m67_002.xlsx_RoiSetAuto-103.zip Distance px	32	8953.12	0.540728	926.919	9.65901	926.919
acG-06f_m67_002	acG	acG-06f_m67_002.xlsx_RoiSetAuto-104.zip Distance px	32	10785	0.464979	926.919	11.6353	926.919
acG-06f_m67_002	acG	acG-06f_m67_002.xlsx_RoiSetAuto-105.zip Distance px	36	12294	0.703462	926.919	13.2633	926.919
acG-06f_m67_002	acG	acG-06f_m67_002.xlsx_RoiSetAuto-106.zip Distance px	44	14323.3	0.734154	926.919	15.4525	926.919
acG-06f_m67_002	acG	acG-06f_m67_002.xlsx_RoiSetAuto-107.zip Distance px	84	11060.3	1.15146	926.919	11.9323	926.919
acG-06f_m67_002	acG	acG-06f_m67_002.xlsx_RoiSetAuto-108.zip Distance px	48	15773.4	0.823016	926.919	17.017	926.919
acG-06f_m67_002	acG	acG-06f_m67_002.xlsx_RoiSetAuto-109.zip Distance px	60	16004.5	1.0401	926.919	17.2663	926.919
acG-06f_m67_002	acG	acG-06f_m67_002.xlsx_RoiSetAuto-11.zip Distance px	36	9231.47	0.540781	926.919	9.95931	926.919
acG-06f_m67_002	acG	acG-06f_m67_002.xlsx_RoiSetAuto-110.zip Distance px	24	11823.1	0.439051	926.919	12.7553	926.919
acG-06f_m67_002	acG	acG-06f_m67_002.xlsx_RoiSetAuto-111.zip Distance px	52	14891.5	0.81008	926.919	16.0656	926.919
acG-06f_m67_002	acG	acG-06f_m67_002.xlsx_RoiSetAuto-112.zip Distance px	20	10004.3	0.356695	926.919	10.7931	926.919
acG-06f_m67_002	acG	acG-06f_m67_002.xlsx_RoiSetAuto-113.zip Distance px	52	8870.12	1.08774	926.919	9.56947	926.919
acG-06f_m67_002	acG	acG-06f_m67_002.xlsx_RoiSetAuto-116.zip Distance px	16	8597.45	0.393787	926.919	9.27531	926.919
acG-06f_m67_002	acG	acG-06f_m67_002.xlsx_RoiSetAuto-117.zip Distance px	24	10116.5	0.201762	926.919	10.9141	926.919
acG-06f_m67_002	acG	acG-06f_m67_002.xlsx_RoiSetAuto-12.zip Distance px	44	13674.7	0.950621	926.919	14.7529	926.919
acG-06f_m67_002	acG	acG-06f_m67_002.xlsx_RoiSetAuto-120.zip Distance px	32	9613.33	0.569391	926.919	10.3713	926.919
acG-06f_m67_002	acG	acG-06f_m67_002.xlsx_RoiSetAuto-122.zip Distance px	84	18640.5	1.39174	926.919	20.1102	926.919
acG-06f_m67_002	acG	acG-06f_m67_002.xlsx_RoiSetAuto-124.zip Distance px	24	10075.1	0.129643	926.919	10.8694	926.919
acG-06f_m67_002	acG	acG-06f_m67_002.xlsx_RoiSetAuto-125.zip Distance px	40	10757.5	0.961805	926.919	11.6056	926.919
acG-06f_m67_002	acG	acG-06f_m67_002.xlsx_RoiSetAuto-126.zip Distance px	64	11734.8	0.711416	926.919	12.66	926.919
acG-06f_m67_002	acG	acG-06f_m67_002.xlsx_RoiSetAuto-127.zip Distance px	40	14864.7	0.972667	926.919	16.0367	926.919
acG-06f_m67_002	acG	acG-06f_m67_002.xlsx_RoiSetAuto-128.zip Distance px	56	18556.8	1.01813	926.919	20.0198	926.919
acG-06f_m67_002	acG	acG-06f_m67_002.xlsx_RoiSetAuto-129.zip Distance px	20	11574.8	0.568565	926.919	12.4874	926.919
acG-06f_m67_002	acG	acG-06f_m67_002.xlsx_RoiSetAuto-13.zip Distance px	56	21615.4	0.453456	926.919	23.3196	926.919
acG-06f_m67_002	acG	acG-06f_m67_002.xlsx_RoiSetAuto-130.zip Distance px	24	10003.1	0.20359	926.919	10.7918	926.919
acG-06f_m67_002	acG	acG-06f_m67_002.xlsx_RoiSetAuto-132.zip Distance px	24	10404.1	0.388826	926.919	11.2243	926.919
acG-06f_m67_002	acG	acG-06f_m67_002.xlsx_RoiSetAuto-133.zip Distance px	16	10838.8	0.345326	926.919	11.6934	926.919
acG-06f_m67_002	acG	acG-06f_m67_002.xlsx_RoiSetAuto-134.zip Distance px	32	5322.22	1.0797	926.919	5.74184	926.919
acG-06f_m67_002	acG	acG-06f_m67_002.xlsx_RoiSetAuto-136.zip Distance px	24	10805.1	0.899511	926.919	11.6571	926.919
acG-06f_m67_002	acG	acG-06f_m67_002.xlsx_RoiSetAuto-137.zip Distance px	44	10990	0.765055	926.919	11.8564	926.919
acG-06f_m67_002	acG	acG-06f_m67_002.xlsx_RoiSetAuto-139.zip Distance px	36	14627.6	0.59351	926.919	15.7809	926.919
acG-06f_m67_002	acG	acG-06f_m67_002.xlsx_RoiSetAuto-14.zip Distance px	48	13054.9	1.02882	926.919	14.0842	926.919
acG-06f_m67_002	acG	acG-06f_m67_002.xlsx_RoiSetAuto-141.zip Distance px	20	10045.7	0.260047	926.919	10.8378	926.919
acG-06f_m67_002	acG	acG-06f_m67_002.xlsx_RoiSetAuto-142.zip Distance px	20	10061.1	0.51408	926.919	10.8543	926.919
acG-06f_m67_002	acG	acG-06f_m67_002.xlsx_RoiSetAuto-143.zip Distance px	20	11166.2	0.517142	926.919	12.0466	926.919
acG-06f_m67_002	acG	acG-06f_m67_002.xlsx_RoiSetAuto-144.zip Distance px	32	11659.9	0.801579	926.919	12.5792	926.919
acG-06f_m67_002	acG	acG-06f_m67_002.xlsx_RoiSetAuto-146.zip Distance px	16	9771.24	0.472686	926.919	10.5416	926.919
acG-06f_m67_002	acG	acG-06f_m67_002.xlsx_RoiSetAuto-147.zip Distance px	36	13281.8	0.517297	926.919	14.329	926.919
acG-06f_m67_002	acG	acG-06f_m67_002.xlsx_RoiSetAuto-148.zip Distance px	48	12459.9	0.8418	926.919	13.4423	926.919
acG-06f_m67_002	acG	acG-06f_m67_002.xlsx_RoiSetAuto-150.zip Distance px	72	11469.3	0.700672	926.919	12.3735	926.919
acG-06f_m67_002	acG	acG-06f_m67_002.xlsx_RoiSetAuto-151.zip Distance px	52	12404	0.635497	926.919	13.3819	926.919
acG-06f_m67_002	acG	acG-06f_m67_002.xlsx_RoiSetAuto-152.zip Distance px	16	11323.5	0.487534	926.919	12.2163	926.919
acG-06f_m67_002	acG	acG-06f_m67_002.xlsx_RoiSetAuto-154.zip Distance px	32	10689.4	0.570065	926.919	11.5322	926.919
acG-06f_m67_002	acG	acG-06f_m67_002.xlsx_RoiSetAuto-155.zip Distance px	32	10764.1	0.265586	926.919	11.6127	926.919
acG-06f_m67_002	acG	acG-06f_m67_002.xlsx_RoiSetAuto-156.zip Distance px	32	9641.18	0.126883	926.919	10.4013	926.919
acG-06f_m67_002	acG	acG-06f_m67_002.xlsx_RoiSetAuto-157.zip Distance px	36	11167.4	0.682782	926.919	12.0479	926.919
acG-06f_m67_002	acG	acG-06f_m67_002.xlsx_RoiSetAuto-158.zip Distance px	20	8988.27	0.236011	926.919	9.69694	926.919
acG-06f_m67_002	acG	acG-06f_m67_002.xlsx_RoiSetAuto-159.zip Distance px	16	11115.1	0.384705	926.919	11.9914	926.919
acG-06f_m67_002	acG	acG-06f_m67_002.xlsx_RoiSetAuto-16.zip Distance px	96	17714.9	1.27067	926.919	19.1116	926.919
acG-06f_m67_002	acG	acG-06f_m67_002.xlsx_RoiSetAuto-160.zip Distance px	20	14371	0.417038	926.919	15.5041	926.919
acG-06f_m67_002	acG	acG-06f_m67_002.xlsx_RoiSetAuto-161.zip Distance px	40	15364.3	0.745638	926.919	16.5757	926.919
acG-06f_m67_002	acG	acG-06f_m67_002.xlsx_RoiSetAuto-162.zip Distance px	40	12119.3	0.473539	926.919	13.0748	926.919
acG-06f_m67_002	acG	acG-06f_m67_002.xlsx_RoiSetAuto-164.zip Distance px	28	10913.3	0.410547	926.919	11.7737	926.919
acG-06f_m67_002	acG	acG-06f_m67_002.xlsx_RoiSetAuto-165.zip Distance px	36	14318.2	0.68415	926.919	15.4471	926.919
acG-06f_m67_002	acG	acG-06f_m67_002.xlsx_RoiSetAuto-166.zip Distance px	56	12617.9	1.28177	926.919	13.6127	926.919
acG-06f_m67_002	acG	acG-06f_m67_002.xlsx_RoiSetAuto-167.zip Distance px	20	11086.8	0.436446	926.919	11.9609	926.919
acG-06f_m67_002	acG	acG-06f_m67_002.xlsx_RoiSetAuto-168.zip Distance px	44	11386.9	0.385854	926.919	12.2847	926.919
acG-06f_m67_002	acG	acG-06f_m67_002.xlsx_RoiSetAuto-17.zip Distance px	20	13548	0.50785	926.919	14.6162	926.919
acG-06f_m67_002	acG	acG-06f_m67_002.xlsx_RoiSetAuto-170.zip Distance px	28	9657.63	0.52996	926.919	10.4191	926.919
acG-06f_m67_002	acG	acG-06f_m67_002.xlsx_RoiSetAuto-171.zip Distance px	40	21554.7	1.17674	926.919	23.2541	926.919
acG-06f_m67_002	acG	acG-06f_m67_002.xlsx_RoiSetAuto-172.zip Distance px	28	15902	0.609688	926.919	17.1558	926.919
acG-06f_m67_002	acG	acG-06f_m67_002.xlsx_RoiSetAuto-174.zip Distance px	32	11591.3	0.415745	926.919	12.5052	926.919
acG-06f_m67_002	acG	acG-06f_m67_002.xlsx_RoiSetAuto-175.zip Distance px	20	11003.1	0.379428	926.919	11.8706	926.919
acG-06f_m67_002	acG	acG-06f_m67_002.xlsx_RoiSetAuto-176.zip Distance px	32	16714.6	0.620751	926.919	18.0325	926.919
acG-06f_m67_002	acG	acG-06f_m67_002.xlsx_RoiSetAuto-177.zip Distance px	76	18245.4	0.781004	926.919	19.6839	926.919
acG-06f_m67_002	acG	acG-06f_m67_002.xlsx_RoiSetAuto-178.zip Distance px	24	10041.1	0.401459	926.919	10.8328	926.919
acG-06f_m67_002	acG	acG-06f_m67_002.xlsx_RoiSetAuto-179.zip Distance px	80	23251.8	1.77106	926.919	25.0851	926.919
acG-06f_m67_002	acG	acG-06f_m67_002.xlsx_RoiSetAuto-18.zip Distance px	32	11516.3	0.734042	926.919	12.4243	926.919
acG-06f_m67_002	acG	acG-06f_m67_002.xlsx_RoiSetAuto-180.zip Distance px	40	12303.4	0.456968	926.919	13.2735	926.919
acG-06f_m67_002	acG	acG-06f_m67_002.xlsx_RoiSetAuto-181.zip Distance px	24	12195	0.47512	926.919	13.1565	926.919
acG-06f_m67_002	acG	acG-06f_m67_002.xlsx_RoiSetAuto-182.zip Distance px	28	10684.6	0.785734	926.919	11.527	926.919
acG-06f_m67_002	acG	acG-06f_m67_002.xlsx_RoiSetAuto-183.zip Distance px	32	10097.7	0.385849	926.919	10.8938	926.919
acG-06f_m67_002	acG	acG-06f_m67_002.xlsx_RoiSetAuto-185.zip Distance px	24	9791.5	0.408283	926.919	10.5635	926.919
acG-06f_m67_002	acG	acG-06f_m67_002.xlsx_RoiSetAuto-186.zip Distance px	84	15572.6	0.783734	926.919	16.8004	926.919
acG-06f_m67_002	acG	acG-06f_m67_002.xlsx_RoiSetAuto-187.zip Distance px	20	14815.8	0.799358	926.919	15.984	926.919
acG-06f_m67_002	acG	acG-06f_m67_002.xlsx_RoiSetAuto-188.zip Distance px	40	13129.4	0.773592	926.919	14.1646	926.919
acG-06f_m67_002	acG	acG-06f_m67_002.xlsx_RoiSetAuto-189.zip Distance px	60	13586.1	0.542707	926.919	14.6573	926.919
acG-06f_m67_002	acG	acG-06f_m67_002.xlsx_RoiSetAuto-19.zip Distance px	20	11233	0.284135	926.919	12.1186	926.919
acG-06f_m67_002	acG	acG-06f_m67_002.xlsx_RoiSetAuto-190.zip Distance px	56	18319.8	0.97677	926.919	19.7642	926.919
acG-06f_m67_002	acG	acG-06f_m67_002.xlsx_RoiSetAuto-191.zip Distance px	28	11631.1	0.550006	926.919	12.5481	926.919
acG-06f_m67_002	acG	acG-06f_m67_002.xlsx_RoiSetAuto-192.zip Distance px	68	17766.3	1.11048	926.919	19.167	926.919
acG-06f_m67_002	acG	acG-06f_m67_002.xlsx_RoiSetAuto-193.zip Distance px	48	13922.6	0.870154	926.919	15.0203	926.919
acG-06f_m67_002	acG	acG-06f_m67_002.xlsx_RoiSetAuto-194.zip Distance px	48	15527.5	0.988089	926.919	16.7518	926.919
acG-06f_m67_002	acG	acG-06f_m67_002.xlsx_RoiSetAuto-196.zip Distance px	32	10347.3	0.631578	926.919	11.1632	926.919
acG-06f_m67_002	acG	acG-06f_m67_002.xlsx_RoiSetAuto-197.zip Distance px	16	13048.9	0.459581	926.919	14.0777	926.919
acG-06f_m67_002	acG	acG-06f_m67_002.xlsx_RoiSetAuto-198.zip Distance px	24	11059.3	0.500019	926.919	11.9313	926.919
acG-06f_m67_002	acG	acG-06f_m67_002.xlsx_RoiSetAuto-199.zip Distance px	16	12357.5	0.352133	926.919	13.3318	926.919
acG-06f_m67_002	acG	acG-06f_m67_002.xlsx_RoiSetAuto-2.zip Distance px	24	8402.05	0.364987	926.919	9.06449	926.919
acG-06f_m67_002	acG	acG-06f_m67_002.xlsx_RoiSetAuto-20.zip Distance px	160	15895.5	1.49496	926.919	17.1487	926.919
acG-06f_m67_002	acG	acG-06f_m67_002.xlsx_RoiSetAuto-200.zip Distance px	68	14147.3	0.43053	926.919	15.2628	926.919
acG-06f_m67_002	acG	acG-06f_m67_002.xlsx_RoiSetAuto-201.zip Distance px	20	9356.92	0.426411	926.919	10.0947	926.919
acG-06f_m67_002	acG	acG-06f_m67_002.xlsx_RoiSetAuto-202.zip Distance px	36	12339.9	0.67753	926.919	13.3129	926.919
acG-06f_m67_002	acG	acG-06f_m67_002.xlsx_RoiSetAuto-204.zip Distance px	76	14813.8	0.78514	926.919	15.9818	926.919
acG-06f_m67_002	acG	acG-06f_m67_002.xlsx_RoiSetAuto-205.zip Distance px	20	11121.2	0.175997	926.919	11.998	926.919
acG-06f_m67_002	acG	acG-06f_m67_002.xlsx_RoiSetAuto-206.zip Distance px	68	12598.1	0.652313	926.919	13.5913	926.919
acG-06f_m67_002	acG	acG-06f_m67_002.xlsx_RoiSetAuto-21.zip Distance px	36	14002.5	0.818842	926.919	15.1065	926.919
acG-06f_m67_002	acG	acG-06f_m67_002.xlsx_RoiSetAuto-210.zip Distance px	32	10511.3	0.349554	926.919	11.3401	926.919
acG-06f_m67_002	acG	acG-06f_m67_002.xlsx_RoiSetAuto-212.zip Distance px	20	9929.66	0.184985	926.919	10.7126	926.919
acG-06f_m67_002	acG	acG-06f_m67_002.xlsx_RoiSetAuto-213.zip Distance px	68	18456.1	0.52993	926.919	19.9113	926.919
acG-06f_m67_002	acG	acG-06f_m67_002.xlsx_RoiSetAuto-214.zip Distance px	20	8608.33	0.620575	926.919	9.28704	926.919
acG-06f_m67_002	acG	acG-06f_m67_002.xlsx_RoiSetAuto-218.zip Distance px	40	15246	0.627993	926.919	16.4481	926.919
acG-06f_m67_002	acG	acG-06f_m67_002.xlsx_RoiSetAuto-219.zip Distance px	40	12433.6	0.673349	926.919	13.4139	926.919
acG-06f_m67_002	acG	acG-06f_m67_002.xlsx_RoiSetAuto-22.zip Distance px	140	16581.9	1.10952	926.919	17.8893	926.919
acG-06f_m67_002	acG	acG-06f_m67_002.xlsx_RoiSetAuto-220.zip Distance px	48	13859.8	0.707557	926.919	14.9525	926.919
acG-06f_m67_002	acG	acG-06f_m67_002.xlsx_RoiSetAuto-221.zip Distance px	40	11806.4	0.622707	926.919	12.7372	926.919
acG-06f_m67_002	acG	acG-06f_m67_002.xlsx_RoiSetAuto-222.zip Distance px	28	11882.8	0.530763	926.919	12.8196	926.919
acG-06f_m67_002	acG	acG-06f_m67_002.xlsx_RoiSetAuto-223.zip Distance px	20	10742.6	0.355013	926.919	11.5896	926.919
acG-06f_m67_002	acG	acG-06f_m67_002.xlsx_RoiSetAuto-224.zip Distance px	44	12158.8	0.808778	926.919	13.1174	926.919
acG-06f_m67_002	acG	acG-06f_m67_002.xlsx_RoiSetAuto-225.zip Distance px	36	10879.6	0.644789	926.919	11.7374	926.919
acG-06f_m67_002	acG	acG-06f_m67_002.xlsx_RoiSetAuto-226.zip Distance px	20	9488.48	0.533625	926.919	10.2366	926.919
acG-06f_m67_002	acG	acG-06f_m67_002.xlsx_RoiSetAuto-227.zip Distance px	48	14132.1	0.807022	926.919	15.2463	926.919
acG-06f_m67_002	acG	acG-06f_m67_002.xlsx_RoiSetAuto-228.zip Distance px	48	13114.6	0.717619	926.919	14.1486	926.919
acG-06f_m67_002	acG	acG-06f_m67_002.xlsx_RoiSetAuto-229.zip Distance px	16	14537.6	0.373543	926.919	15.6838	926.919
acG-06f_m67_002	acG	acG-06f_m67_002.xlsx_RoiSetAuto-23.zip Distance px	36	18831.9	0.840818	926.919	20.3167	926.919
acG-06f_m67_002	acG	acG-06f_m67_002.xlsx_RoiSetAuto-231.zip Distance px	28	10961.9	0.40331	926.919	11.8261	926.919
acG-06f_m67_002	acG	acG-06f_m67_002.xlsx_RoiSetAuto-232.zip Distance px	16	12986.7	0.153315	926.919	14.0106	926.919
acG-06f_m67_002	acG	acG-06f_m67_002.xlsx_RoiSetAuto-233.zip Distance px	40	16141	0.601729	926.919	17.4137	926.919
acG-06f_m67_002	acG	acG-06f_m67_002.xlsx_RoiSetAuto-234.zip Distance px	40	16299.9	0.930029	926.919	17.5851	926.919
acG-06f_m67_002	acG	acG-06f_m67_002.xlsx_RoiSetAuto-236.zip Distance px	16	11470.1	0.3805	926.919	12.3745	926.919
acG-06f_m67_002	acG	acG-06f_m67_002.xlsx_RoiSetAuto-237.zip Distance px	44	12825.5	0.467973	926.919	13.8367	926.919
acG-06f_m67_002	acG	acG-06f_m67_002.xlsx_RoiSetAuto-238.zip Distance px	16	9790.46	0.28037	926.919	10.5624	926.919
acG-06f_m67_002	acG	acG-06f_m67_002.xlsx_RoiSetAuto-240.zip Distance px	16	12489.2	0.411937	926.919	13.4738	926.919
acG-06f_m67_002	acG	acG-06f_m67_002.xlsx_RoiSetAuto-241.zip Distance px	36	15965.8	0.962054	926.919	17.2246	926.919
acG-06f_m67_002	acG	acG-06f_m67_002.xlsx_RoiSetAuto-242.zip Distance px	20	20276	0.55696	926.919	21.8746	926.919
acG-06f_m67_002	acG	acG-06f_m67_002.xlsx_RoiSetAuto-243.zip Distance px	20	9812.65	0.380152	926.919	10.5863	926.919
acG-06f_m67_002	acG	acG-06f_m67_002.xlsx_RoiSetAuto-245.zip Distance px	24	17079.5	0.563905	926.919	18.4261	926.919
acG-06f_m67_002	acG	acG-06f_m67_002.xlsx_RoiSetAuto-247.zip Distance px	20	9987.39	0.363886	926.919	10.7748	926.919
acG-06f_m67_002	acG	acG-06f_m67_002.xlsx_RoiSetAuto-248.zip Distance px	16	11125.4	0.646745	926.919	12.0026	926.919
acG-06f_m67_002	acG	acG-06f_m67_002.xlsx_RoiSetAuto-249.zip Distance px	24	16240.1	0.92071	926.919	17.5206	926.919
acG-06f_m67_002	acG	acG-06f_m67_002.xlsx_RoiSetAuto-25.zip Distance px	96	12371.1	0.938081	926.919	13.3465	926.919
acG-06f_m67_002	acG	acG-06f_m67_002.xlsx_RoiSetAuto-250.zip Distance px	16	12824.2	0.712753	926.919	13.8353	926.919
acG-06f_m67_002	acG	acG-06f_m67_002.xlsx_RoiSetAuto-251.zip Distance px	20	13955.5	0.47781	926.919	15.0558	926.919
acG-06f_m67_002	acG	acG-06f_m67_002.xlsx_RoiSetAuto-252.zip Distance px	24	21282.7	0.744304	926.919	22.9607	926.919
acG-06f_m67_002	acG	acG-06f_m67_002.xlsx_RoiSetAuto-254.zip Distance px	16	11675.8	0.2382	926.919	12.5964	926.919
acG-06f_m67_002	acG	acG-06f_m67_002.xlsx_RoiSetAuto-26.zip Distance px	52	11101.8	0.512041	926.919	11.9771	926.919
acG-06f_m67_002	acG	acG-06f_m67_002.xlsx_RoiSetAuto-27.zip Distance px	20	11750.5	0.167244	926.919	12.677	926.919
acG-06f_m67_002	acG	acG-06f_m67_002.xlsx_RoiSetAuto-28.zip Distance px	48	27353	0.531809	926.919	29.5096	926.919
acG-06f_m67_002	acG	acG-06f_m67_002.xlsx_RoiSetAuto-29.zip Distance px	24	18577	0.893319	926.919	20.0417	926.919
acG-06f_m67_002	acG	acG-06f_m67_002.xlsx_RoiSetAuto-30.zip Distance px	20	9835.83	0.384394	926.919	10.6113	926.919
acG-06f_m67_002	acG	acG-06f_m67_002.xlsx_RoiSetAuto-31.zip Distance px	88	15484.2	0.957582	926.919	16.705	926.919
acG-06f_m67_002	acG	acG-06f_m67_002.xlsx_RoiSetAuto-32.zip Distance px	20	10375.4	0.768881	926.919	11.1934	926.919
acG-06f_m67_002	acG	acG-06f_m67_002.xlsx_RoiSetAuto-33.zip Distance px	24	13232.1	0.260369	926.919	14.2753	926.919
acG-06f_m67_002	acG	acG-06f_m67_002.xlsx_RoiSetAuto-34.zip Distance px	104	11132.9	0.875897	926.919	12.0107	926.919
acG-06f_m67_002	acG	acG-06f_m67_002.xlsx_RoiSetAuto-37.zip Distance px	36	12266.4	0.681412	926.919	13.2336	926.919
acG-06f_m67_002	acG	acG-06f_m67_002.xlsx_RoiSetAuto-38.zip Distance px	80	17904.8	0.928165	926.919	19.3165	926.919
acG-06f_m67_002	acG	acG-06f_m67_002.xlsx_RoiSetAuto-39.zip Distance px	36	8457.05	0.287695	926.919	9.12384	926.919
acG-06f_m67_002	acG	acG-06f_m67_002.xlsx_RoiSetAuto-4.zip Distance px	24	8333.44	0.508601	926.919	8.99047	926.919
acG-06f_m67_002	acG	acG-06f_m67_002.xlsx_RoiSetAuto-40.zip Distance px	16	6791.63	0.199236	926.919	7.3271	926.919
acG-06f_m67_002	acG	acG-06f_m67_002.xlsx_RoiSetAuto-41.zip Distance px	180	13377	0.786451	926.919	14.4317	926.919
acG-06f_m67_002	acG	acG-06f_m67_002.xlsx_RoiSetAuto-42.zip Distance px	140	23501.2	1.43037	926.919	25.3541	926.919
acG-06f_m67_002	acG	acG-06f_m67_002.xlsx_RoiSetAuto-43.zip Distance px	40	14816.7	0.717687	926.919	15.9849	926.919
acG-06f_m67_002	acG	acG-06f_m67_002.xlsx_RoiSetAuto-45.zip Distance px	56	19786.4	0.829812	926.919	21.3465	926.919
acG-06f_m67_002	acG	acG-06f_m67_002.xlsx_RoiSetAuto-46.zip Distance px	100	12350.8	0.946673	926.919	13.3246	926.919
acG-06f_m67_002	acG	acG-06f_m67_002.xlsx_RoiSetAuto-47.zip Distance px	96	11745.1	0.599318	926.919	12.6711	926.919
acG-06f_m67_002	acG	acG-06f_m67_002.xlsx_RoiSetAuto-49.zip Distance px	20	15623.5	0.363928	926.919	16.8553	926.919
acG-06f_m67_002	acG	acG-06f_m67_002.xlsx_RoiSetAuto-5.zip Distance px	32	10384.9	0.984127	926.919	11.2037	926.919
acG-06f_m67_002	acG	acG-06f_m67_002.xlsx_RoiSetAuto-50.zip Distance px	88	15403.5	0.954736	926.919	16.6179	926.919
acG-06f_m67_002	acG	acG-06f_m67_002.xlsx_RoiSetAuto-51.zip Distance px	76	13605.3	0.822195	926.919	14.6779	926.919
acG-06f_m67_002	acG	acG-06f_m67_002.xlsx_RoiSetAuto-54.zip Distance px	20	8514.47	0.436015	926.919	9.18577	926.919
acG-06f_m67_002	acG	acG-06f_m67_002.xlsx_RoiSetAuto-55.zip Distance px	36	13653.5	0.56293	926.919	14.7299	926.919
acG-06f_m67_002	acG	acG-06f_m67_002.xlsx_RoiSetAuto-56.zip Distance px	32	13744.2	0.645532	926.919	14.8278	926.919
acG-06f_m67_002	acG	acG-06f_m67_002.xlsx_RoiSetAuto-57.zip Distance px	76	14339.4	1.08938	926.919	15.4699	926.919
acG-06f_m67_002	acG	acG-06f_m67_002.xlsx_RoiSetAuto-58.zip Distance px	92	12696.3	0.83155	926.919	13.6973	926.919
acG-06f_m67_002	acG	acG-06f_m67_002.xlsx_RoiSetAuto-59.zip Distance px	20	9435.38	0.309622	926.919	10.1793	926.919
acG-06f_m67_002	acG	acG-06f_m67_002.xlsx_RoiSetAuto-6.zip Distance px	272	19841.8	1.35636	926.919	21.4062	926.919
acG-06f_m67_002	acG	acG-06f_m67_002.xlsx_RoiSetAuto-60.zip Distance px	76	23312.1	1.36772	926.919	25.1501	926.919
acG-06f_m67_002	acG	acG-06f_m67_002.xlsx_RoiSetAuto-61.zip Distance px	120	11325.6	0.868561	926.919	12.2185	926.919
acG-06f_m67_002	acG	acG-06f_m67_002.xlsx_RoiSetAuto-63.zip Distance px	32	11717.1	0.562936	926.919	12.641	926.919
acG-06f_m67_002	acG	acG-06f_m67_002.xlsx_RoiSetAuto-64.zip Distance px	40	11424.5	0.501253	926.919	12.3253	926.919
acG-06f_m67_002	acG	acG-06f_m67_002.xlsx_RoiSetAuto-65.zip Distance px	52	16206.5	0.852639	926.919	17.4843	926.919
acG-06f_m67_002	acG	acG-06f_m67_002.xlsx_RoiSetAuto-66.zip Distance px	36	10510.4	0.44784	926.919	11.339	926.919
acG-06f_m67_002	acG	acG-06f_m67_002.xlsx_RoiSetAuto-69.zip Distance px	52	16915.1	1.28997	926.919	18.2487	926.919
acG-06f_m67_002	acG	acG-06f_m67_002.xlsx_RoiSetAuto-7.zip Distance px	168	18848.2	1.45715	926.919	20.3342	926.919
acG-06f_m67_002	acG	acG-06f_m67_002.xlsx_RoiSetAuto-70.zip Distance px	36	9308.11	0.345553	926.919	10.042	926.919
acG-06f_m67_002	acG	acG-06f_m67_002.xlsx_RoiSetAuto-71.zip Distance px	68	24705.7	1.40154	926.919	26.6535	926.919
acG-06f_m67_002	acG	acG-06f_m67_002.xlsx_RoiSetAuto-72.zip Distance px	32	10392.8	0.334464	926.919	11.2122	926.919
acG-06f_m67_002	acG	acG-06f_m67_002.xlsx_RoiSetAuto-73.zip Distance px	56	10800.3	0.4431	926.919	11.6518	926.919
acG-06f_m67_002	acG	acG-06f_m67_002.xlsx_RoiSetAuto-74.zip Distance px	72	12041	0.735528	926.919	12.9903	926.919
acG-06f_m67_002	acG	acG-06f_m67_002.xlsx_RoiSetAuto-75.zip Distance px	36	8364.95	0.335845	926.919	9.02447	926.919
acG-06f_m67_002	acG	acG-06f_m67_002.xlsx_RoiSetAuto-77.zip Distance px	24	10732.5	0.484831	926.919	11.5787	926.919
acG-06f_m67_002	acG	acG-06f_m67_002.xlsx_RoiSetAuto-78.zip Distance px	104	19005	0.984092	926.919	20.5035	926.919
acG-06f_m67_002	acG	acG-06f_m67_002.xlsx_RoiSetAuto-8.zip Distance px	32	10197.2	0.639493	926.919	11.0012	926.919
acG-06f_m67_002	acG	acG-06f_m67_002.xlsx_RoiSetAuto-80.zip Distance px	20	8724.77	0.133875	926.919	9.41266	926.919
acG-06f_m67_002	acG	acG-06f_m67_002.xlsx_RoiSetAuto-81.zip Distance px	20	11534.8	0.347191	926.919	12.4442	926.919
acG-06f_m67_002	acG	acG-06f_m67_002.xlsx_RoiSetAuto-82.zip Distance px	28	13602.6	0.751021	926.919	14.6751	926.919
acG-06f_m67_002	acG	acG-06f_m67_002.xlsx_RoiSetAuto-83.zip Distance px	112	14337.5	1.23123	926.919	15.4679	926.919
acG-06f_m67_002	acG	acG-06f_m67_002.xlsx_RoiSetAuto-85.zip Distance px	32	13315.3	1.15198	926.919	14.3652	926.919
acG-06f_m67_002	acG	acG-06f_m67_002.xlsx_RoiSetAuto-86.zip Distance px	52	13706.1	0.85627	926.919	14.7868	926.919
acG-06f_m67_002	acG	acG-06f_m67_002.xlsx_RoiSetAuto-87.zip Distance px	104	13457.8	0.796356	926.919	14.5189	926.919
acG-06f_m67_002	acG	acG-06f_m67_002.xlsx_RoiSetAuto-88.zip Distance px	40	11435.2	0.664539	926.919	12.3368	926.919
acG-06f_m67_002	acG	acG-06f_m67_002.xlsx_RoiSetAuto-89.zip Distance px	48	12169.6	0.535667	926.919	13.1291	926.919
acG-06f_m67_002	acG	acG-06f_m67_002.xlsx_RoiSetAuto-9.zip Distance px	40	13708.4	0.690895	926.919	14.7892	926.919
acG-06f_m67_002	acG	acG-06f_m67_002.xlsx_RoiSetAuto-90.zip Distance px	36	11095	0.485505	926.919	11.9698	926.919
acG-06f_m67_002	acG	acG-06f_m67_002.xlsx_RoiSetAuto-92.zip Distance px	28	9935.19	0.431776	926.919	10.7185	926.919
acG-06f_m67_002	acG	acG-06f_m67_002.xlsx_RoiSetAuto-93.zip Distance px	92	12955.5	0.81709	926.919	13.9769	926.919
acG-06f_m67_002	acG	acG-06f_m67_002.xlsx_RoiSetAuto-95.zip Distance px	20	10089.7	0.389394	926.919	10.8852	926.919
acG-06f_m67_002	acG	acG-06f_m67_002.xlsx_RoiSetAuto-97.zip Distance px	40	11061.8	0.543235	926.919	11.934	926.919
acG-06f_m67_002	acG	acG-06f_m67_002.xlsx_RoiSetAuto-99.zip Distance px	40	12134.2	0.568116	926.919	13.0909	926.919
acR-01f_m67_002	acR	acR-01f_m67_002.xlsx_RoiSetAuto-1.zip Distance px	48	3922.29	0.68795	312.902	12.5352	312.902
acR-01f_m67_002	acR	acR-01f_m67_002.xlsx_RoiSetAuto-10.zip Distance px	28	3363.78	0.579696	312.902	10.7503	312.902
acR-01f_m67_002	acR	acR-01f_m67_002.xlsx_RoiSetAuto-11.zip Distance px	72	5460.81	0.620864	312.902	17.4521	312.902
acR-01f_m67_002	acR	acR-01f_m67_002.xlsx_RoiSetAuto-14.zip Distance px	16	3110.72	0.3074	312.902	9.94153	312.902
acR-01f_m67_002	acR	acR-01f_m67_002.xlsx_RoiSetAuto-15.zip Distance px	208	5015.39	1.20444	312.902	16.0286	312.902
acR-01f_m67_002	acR	acR-01f_m67_002.xlsx_RoiSetAuto-17.zip Distance px	16	3803.81	0.697699	312.902	12.1566	312.902
acR-01f_m67_002	acR	acR-01f_m67_002.xlsx_RoiSetAuto-18.zip Distance px	20	2617.28	0.534608	312.902	8.36453	312.902
acR-01f_m67_002	acR	acR-01f_m67_002.xlsx_RoiSetAuto-19.zip Distance px	40	3892.91	0.584419	312.902	12.4413	312.902
acR-01f_m67_002	acR	acR-01f_m67_002.xlsx_RoiSetAuto-2.zip Distance px	60	6503.31	0.481399	312.902	20.7839	312.902
acR-01f_m67_002	acR	acR-01f_m67_002.xlsx_RoiSetAuto-20.zip Distance px	20	2986.51	0.283476	312.902	9.54456	312.902
acR-01f_m67_002	acR	acR-01f_m67_002.xlsx_RoiSetAuto-21.zip Distance px	168	6296.41	1.32697	312.902	20.1227	312.902
acR-01f_m67_002	acR	acR-01f_m67_002.xlsx_RoiSetAuto-22.zip Distance px	40	5549.41	0.752712	312.902	17.7353	312.902
acR-01f_m67_002	acR	acR-01f_m67_002.xlsx_RoiSetAuto-23.zip Distance px	88	5096.66	1.07111	312.902	16.2884	312.902
acR-01f_m67_002	acR	acR-01f_m67_002.xlsx_RoiSetAuto-24.zip Distance px	24	3076.22	0.752139	312.902	9.83126	312.902
acR-01f_m67_002	acR	acR-01f_m67_002.xlsx_RoiSetAuto-25.zip Distance px	76	5726.36	1.22778	312.902	18.3008	312.902
acR-01f_m67_002	acR	acR-01f_m67_002.xlsx_RoiSetAuto-26.zip Distance px	16	3418.85	0.454983	312.902	10.9263	312.902
acR-01f_m67_002	acR	acR-01f_m67_002.xlsx_RoiSetAuto-27.zip Distance px	56	6462.13	1.22503	312.902	20.6523	312.902
acR-01f_m67_002	acR	acR-01f_m67_002.xlsx_RoiSetAuto-28.zip Distance px	60	4371.36	0.644537	312.902	13.9704	312.902
acR-01f_m67_002	acR	acR-01f_m67_002.xlsx_RoiSetAuto-29.zip Distance px	44	4041.4	1.14465	312.902	12.9159	312.902
acR-01f_m67_002	acR	acR-01f_m67_002.xlsx_RoiSetAuto-3.zip Distance px	16	2605.56	0.677761	312.902	8.32709	312.902
acR-01f_m67_002	acR	acR-01f_m67_002.xlsx_RoiSetAuto-30.zip Distance px	24	3186.33	0.651362	312.902	10.1832	312.902
acR-01f_m67_002	acR	acR-01f_m67_002.xlsx_RoiSetAuto-31.zip Distance px	40	4231.8	0.613864	312.902	13.5244	312.902
acR-01f_m67_002	acR	acR-01f_m67_002.xlsx_RoiSetAuto-32.zip Distance px	16	3737.2	0.671885	312.902	11.9437	312.902
acR-01f_m67_002	acR	acR-01f_m67_002.xlsx_RoiSetAuto-33.zip Distance px	40	4322.57	1.08346	312.902	13.8145	312.902
acR-01f_m67_002	acR	acR-01f_m67_002.xlsx_RoiSetAuto-34.zip Distance px	20	4027.26	0.384413	312.902	12.8707	312.902
acR-01f_m67_002	acR	acR-01f_m67_002.xlsx_RoiSetAuto-35.zip Distance px	76	3773.1	0.906553	312.902	12.0584	312.902
acR-01f_m67_002	acR	acR-01f_m67_002.xlsx_RoiSetAuto-36.zip Distance px	28	3351.37	0.306792	312.902	10.7106	312.902
acR-01f_m67_002	acR	acR-01f_m67_002.xlsx_RoiSetAuto-37.zip Distance px	52	3921.26	0.82369	312.902	12.5319	312.902
acR-01f_m67_002	acR	acR-01f_m67_002.xlsx_RoiSetAuto-38.zip Distance px	84	19644.6	0.339397	312.902	62.7819	312.902
acR-01f_m67_002	acR	acR-01f_m67_002.xlsx_RoiSetAuto-39.zip Distance px	64	4216.31	0.80472	312.902	13.4749	312.902
acR-01f_m67_002	acR	acR-01f_m67_002.xlsx_RoiSetAuto-4.zip Distance px	64	4104.3	1.32355	312.902	13.1169	312.902
acR-01f_m67_002	acR	acR-01f_m67_002.xlsx_RoiSetAuto-40.zip Distance px	16	3159.2	0.388498	312.902	10.0965	312.902
acR-01f_m67_002	acR	acR-01f_m67_002.xlsx_RoiSetAuto-41.zip Distance px	48	4383.71	0.763961	312.902	14.0099	312.902
acR-01f_m67_002	acR	acR-01f_m67_002.xlsx_RoiSetAuto-42.zip Distance px	20	3717.15	0.464123	312.902	11.8796	312.902
acR-01f_m67_002	acR	acR-01f_m67_002.xlsx_RoiSetAuto-43.zip Distance px	16	3651.84	0.69196	312.902	11.6709	312.902
acR-01f_m67_002	acR	acR-01f_m67_002.xlsx_RoiSetAuto-44.zip Distance px	24	4846.08	0.325091	312.902	15.4876	312.902
acR-01f_m67_002	acR	acR-01f_m67_002.xlsx_RoiSetAuto-45.zip Distance px	16	5324.62	0.36383	312.902	17.0169	312.902
acR-01f_m67_002	acR	acR-01f_m67_002.xlsx_RoiSetAuto-5.zip Distance px	40	4250.77	0.440707	312.902	13.585	312.902
acR-01f_m67_002	acR	acR-01f_m67_002.xlsx_RoiSetAuto-6.zip Distance px	36	4141.56	0.659077	312.902	13.236	312.902
acR-01f_m67_002	acR	acR-01f_m67_002.xlsx_RoiSetAuto-7.zip Distance px	92	4517.85	0.878968	312.902	14.4386	312.902
acR-01f_m67_002	acR	acR-01f_m67_002.xlsx_RoiSetAuto-8.zip Distance px	96	4788.71	0.9551	312.902	15.3042	312.902
acR-01f_m67_002	acR	acR-01f_m67_002.xlsx_RoiSetAuto-9.zip Distance px	24	3603.09	1.27324	312.902	11.5151	312.902
acR-02f_m67_001	acR	acR-02f_m67_001.xlsx_RoiSetAuto-1.zip Distance px	96	3842.97	0.721506	253.669	15.1495	253.669
acR-02f_m67_001	acR	acR-02f_m67_001.xlsx_RoiSetAuto-10.zip Distance px	236	4936.02	1.19486	253.669	19.4585	253.669
acR-02f_m67_001	acR	acR-02f_m67_001.xlsx_RoiSetAuto-11.zip Distance px	108	2668.78	0.985308	253.669	10.5207	253.669
acR-02f_m67_001	acR	acR-02f_m67_001.xlsx_RoiSetAuto-12.zip Distance px	16	2557.64	0.34736	253.669	10.0826	253.669
acR-02f_m67_001	acR	acR-02f_m67_001.xlsx_RoiSetAuto-13.zip Distance px	20	2692.09	0.460228	253.669	10.6126	253.669
acR-02f_m67_001	acR	acR-02f_m67_001.xlsx_RoiSetAuto-15.zip Distance px	16	2955.65	0.299162	253.669	11.6516	253.669
acR-02f_m67_001	acR	acR-02f_m67_001.xlsx_RoiSetAuto-17.zip Distance px	20	2666.55	0.282005	253.669	10.5119	253.669
acR-02f_m67_001	acR	acR-02f_m67_001.xlsx_RoiSetAuto-18.zip Distance px	20	2765.07	1.29059	253.669	10.9003	253.669
acR-02f_m67_001	acR	acR-02f_m67_001.xlsx_RoiSetAuto-19.zip Distance px	48	2802.83	0.913203	253.669	11.0492	253.669
acR-02f_m67_001	acR	acR-02f_m67_001.xlsx_RoiSetAuto-2.zip Distance px	36	3317.58	0.905743	253.669	13.0784	253.669
acR-02f_m67_001	acR	acR-02f_m67_001.xlsx_RoiSetAuto-20.zip Distance px	24	2425.4	0.42781	253.669	9.56126	253.669
acR-02f_m67_001	acR	acR-02f_m67_001.xlsx_RoiSetAuto-21.zip Distance px	48	3293.35	0.882675	253.669	12.9829	253.669
acR-02f_m67_001	acR	acR-02f_m67_001.xlsx_RoiSetAuto-23.zip Distance px	36	2742.79	0.663524	253.669	10.8125	253.669
acR-02f_m67_001	acR	acR-02f_m67_001.xlsx_RoiSetAuto-24.zip Distance px	16	2143.49	0.405532	253.669	8.44994	253.669
acR-02f_m67_001	acR	acR-02f_m67_001.xlsx_RoiSetAuto-25.zip Distance px	24	2211.04	0.732867	253.669	8.71623	253.669
acR-02f_m67_001	acR	acR-02f_m67_001.xlsx_RoiSetAuto-26.zip Distance px	28	2683.67	0.688265	253.669	10.5794	253.669
acR-02f_m67_001	acR	acR-02f_m67_001.xlsx_RoiSetAuto-27.zip Distance px	64	3428.19	1.21286	253.669	13.5144	253.669
acR-02f_m67_001	acR	acR-02f_m67_001.xlsx_RoiSetAuto-28.zip Distance px	128	4720.35	1.31731	253.669	18.6083	253.669
acR-02f_m67_001	acR	acR-02f_m67_001.xlsx_RoiSetAuto-29.zip Distance px	16	2143.57	0.458345	253.669	8.45027	253.669
acR-02f_m67_001	acR	acR-02f_m67_001.xlsx_RoiSetAuto-3.zip Distance px	20	2962.06	0.877712	253.669	11.6769	253.669
acR-02f_m67_001	acR	acR-02f_m67_001.xlsx_RoiSetAuto-30.zip Distance px	28	3054.67	0.527392	253.669	12.0419	253.669
acR-02f_m67_001	acR	acR-02f_m67_001.xlsx_RoiSetAuto-31.zip Distance px	20	3008.83	0.479359	253.669	11.8612	253.669
acR-02f_m67_001	acR	acR-02f_m67_001.xlsx_RoiSetAuto-32.zip Distance px	96	4911.18	0.747823	253.669	19.3606	253.669
acR-02f_m67_001	acR	acR-02f_m67_001.xlsx_RoiSetAuto-33.zip Distance px	92	4570.34	1.2475	253.669	18.0169	253.669
acR-02f_m67_001	acR	acR-02f_m67_001.xlsx_RoiSetAuto-34.zip Distance px	20	2745.32	0.763674	253.669	10.8224	253.669
acR-02f_m67_001	acR	acR-02f_m67_001.xlsx_RoiSetAuto-36.zip Distance px	104	6535.25	1.3447	253.669	25.7629	253.669
acR-02f_m67_001	acR	acR-02f_m67_001.xlsx_RoiSetAuto-38.zip Distance px	16	2375.28	0.572111	253.669	9.36367	253.669
acR-02f_m67_001	acR	acR-02f_m67_001.xlsx_RoiSetAuto-39.zip Distance px	16	2907.49	0.309858	253.669	11.4617	253.669
acR-02f_m67_001	acR	acR-02f_m67_001.xlsx_RoiSetAuto-4.zip Distance px	132	4433.93	1.492	253.669	17.4792	253.669
acR-02f_m67_001	acR	acR-02f_m67_001.xlsx_RoiSetAuto-41.zip Distance px	120	3693.63	1.09046	253.669	14.5608	253.669
acR-02f_m67_001	acR	acR-02f_m67_001.xlsx_RoiSetAuto-42.zip Distance px	120	5270.36	1.49398	253.669	20.7765	253.669
acR-02f_m67_001	acR	acR-02f_m67_001.xlsx_RoiSetAuto-43.zip Distance px	16	2198.38	0.91219	253.669	8.66631	253.669
acR-02f_m67_001	acR	acR-02f_m67_001.xlsx_RoiSetAuto-46.zip Distance px	24	2483.03	0.340916	253.669	9.78845	253.669
acR-02f_m67_001	acR	acR-02f_m67_001.xlsx_RoiSetAuto-48.zip Distance px	16	2541.81	0.332328	253.669	10.0202	253.669
acR-02f_m67_001	acR	acR-02f_m67_001.xlsx_RoiSetAuto-49.zip Distance px	24	2797.85	0.564435	253.669	11.0295	253.669
acR-02f_m67_001	acR	acR-02f_m67_001.xlsx_RoiSetAuto-5.zip Distance px	16	3007.65	0.313295	253.669	11.8566	253.669
acR-02f_m67_001	acR	acR-02f_m67_001.xlsx_RoiSetAuto-50.zip Distance px	76	4859.67	1.11989	253.669	19.1575	253.669
acR-02f_m67_001	acR	acR-02f_m67_001.xlsx_RoiSetAuto-51.zip Distance px	24	2319.63	0.499605	253.669	9.14431	253.669
acR-02f_m67_001	acR	acR-02f_m67_001.xlsx_RoiSetAuto-52.zip Distance px	44	4092.01	0.985185	253.669	16.1313	253.669
acR-02f_m67_001	acR	acR-02f_m67_001.xlsx_RoiSetAuto-53.zip Distance px	76	6096.17	1.26232	253.669	24.032	253.669
acR-02f_m67_001	acR	acR-02f_m67_001.xlsx_RoiSetAuto-54.zip Distance px	28	2269.54	0.538346	253.669	8.94685	253.669
acR-02f_m67_001	acR	acR-02f_m67_001.xlsx_RoiSetAuto-55.zip Distance px	64	4563.23	0.503395	253.669	17.9889	253.669
acR-02f_m67_001	acR	acR-02f_m67_001.xlsx_RoiSetAuto-56.zip Distance px	32	4810.77	0.71333	253.669	18.9647	253.669
acR-02f_m67_001	acR	acR-02f_m67_001.xlsx_RoiSetAuto-58.zip Distance px	20	3261.5	0.63322	253.669	12.8573	253.669
acR-02f_m67_001	acR	acR-02f_m67_001.xlsx_RoiSetAuto-59.zip Distance px	40	2782.89	0.910744	253.669	10.9705	253.669
acR-02f_m67_001	acR	acR-02f_m67_001.xlsx_RoiSetAuto-6.zip Distance px	20	2847.72	0.634131	253.669	11.2261	253.669
acR-02f_m67_001	acR	acR-02f_m67_001.xlsx_RoiSetAuto-60.zip Distance px	32	3425.76	0.842665	253.669	13.5048	253.669
acR-02f_m67_001	acR	acR-02f_m67_001.xlsx_RoiSetAuto-61.zip Distance px	24	2442.07	0.86581	253.669	9.62698	253.669
acR-02f_m67_001	acR	acR-02f_m67_001.xlsx_RoiSetAuto-62.zip Distance px	28	2752.3	0.402325	253.669	10.85	253.669
acR-02f_m67_001	acR	acR-02f_m67_001.xlsx_RoiSetAuto-63.zip Distance px	44	3210.02	0.539935	253.669	12.6544	253.669
acR-02f_m67_001	acR	acR-02f_m67_001.xlsx_RoiSetAuto-64.zip Distance px	16	3042.86	0.385349	253.669	11.9954	253.669
acR-02f_m67_001	acR	acR-02f_m67_001.xlsx_RoiSetAuto-65.zip Distance px	44	4545.56	1.19988	253.669	17.9192	253.669
acR-02f_m67_001	acR	acR-02f_m67_001.xlsx_RoiSetAuto-66.zip Distance px	44	5649.46	1.02029	253.669	22.271	253.669
acR-02f_m67_001	acR	acR-02f_m67_001.xlsx_RoiSetAuto-67.zip Distance px	32	6388.52	0.546616	253.669	25.1844	253.669
acR-02f_m67_001	acR	acR-02f_m67_001.xlsx_RoiSetAuto-68.zip Distance px	40	3763.65	0.803705	253.669	14.8368	253.669
acR-02f_m67_001	acR	acR-02f_m67_001.xlsx_RoiSetAuto-7.zip Distance px	20	2803.7	0.842521	253.669	11.0526	253.669
acR-02f_m67_001	acR	acR-02f_m67_001.xlsx_RoiSetAuto-70.zip Distance px	24	4354.55	0.53349	253.669	17.1663	253.669
acR-02f_m67_001	acR	acR-02f_m67_001.xlsx_RoiSetAuto-71.zip Distance px	24	3079	0.990375	253.669	12.1378	253.669
acR-02f_m67_001	acR	acR-02f_m67_001.xlsx_RoiSetAuto-72.zip Distance px	20	3991.45	0.125253	253.669	15.7348	253.669
acR-02f_m67_001	acR	acR-02f_m67_001.xlsx_RoiSetAuto-73.zip Distance px	20	2758.75	0.622592	253.669	10.8754	253.669
acR-02f_m67_001	acR	acR-02f_m67_001.xlsx_RoiSetAuto-8.zip Distance px	48	5103.9	1.56902	253.669	20.1203	253.669
acR-02f_m67_001	acR	acR-02f_m67_001.xlsx_RoiSetAuto-9.zip Distance px	28	3223.61	0.765915	253.669	12.7079	253.669
acR-02f_m67_002	acR	acR-02f_m67_002.xlsx_RoiSetAuto-1.zip Distance px	124	3542.62	0.781283	300.146	11.803	300.146
acR-02f_m67_002	acR	acR-02f_m67_002.xlsx_RoiSetAuto-11.zip Distance px	40	4964.01	1.12795	300.146	16.5387	300.146
acR-02f_m67_002	acR	acR-02f_m67_002.xlsx_RoiSetAuto-12.zip Distance px	16	2938.43	0.478336	300.146	9.79	300.146
acR-02f_m67_002	acR	acR-02f_m67_002.xlsx_RoiSetAuto-13.zip Distance px	16	3382.94	0.691543	300.146	11.271	300.146
acR-02f_m67_002	acR	acR-02f_m67_002.xlsx_RoiSetAuto-14.zip Distance px	68	3841.44	0.869375	300.146	12.7986	300.146
acR-02f_m67_002	acR	acR-02f_m67_002.xlsx_RoiSetAuto-15.zip Distance px	52	2677.85	0.589554	300.146	8.92184	300.146
acR-02f_m67_002	acR	acR-02f_m67_002.xlsx_RoiSetAuto-16.zip Distance px	88	3726.56	0.993823	300.146	12.4158	300.146
acR-02f_m67_002	acR	acR-02f_m67_002.xlsx_RoiSetAuto-17.zip Distance px	56	3013.47	0.626877	300.146	10.04	300.146
acR-02f_m67_002	acR	acR-02f_m67_002.xlsx_RoiSetAuto-18.zip Distance px	200	4032.62	0.958466	300.146	13.4355	300.146
acR-02f_m67_002	acR	acR-02f_m67_002.xlsx_RoiSetAuto-19.zip Distance px	36	3022.06	0.39995	300.146	10.0687	300.146
acR-02f_m67_002	acR	acR-02f_m67_002.xlsx_RoiSetAuto-2.zip Distance px	104	4722.34	0.646216	300.146	15.7335	300.146
acR-02f_m67_002	acR	acR-02f_m67_002.xlsx_RoiSetAuto-20.zip Distance px	44	4141.07	0.52759	300.146	13.7969	300.146
acR-02f_m67_002	acR	acR-02f_m67_002.xlsx_RoiSetAuto-21.zip Distance px	24	4558.9	0.615192	300.146	15.189	300.146
acR-02f_m67_002	acR	acR-02f_m67_002.xlsx_RoiSetAuto-23.zip Distance px	120	4286.29	1.10817	300.146	14.2807	300.146
acR-02f_m67_002	acR	acR-02f_m67_002.xlsx_RoiSetAuto-24.zip Distance px	28	2739.3	0.229912	300.146	9.12658	300.146
acR-02f_m67_002	acR	acR-02f_m67_002.xlsx_RoiSetAuto-25.zip Distance px	36	3318.05	0.456755	300.146	11.0548	300.146
acR-02f_m67_002	acR	acR-02f_m67_002.xlsx_RoiSetAuto-26.zip Distance px	104	5450.79	0.837783	300.146	18.1605	300.146
acR-02f_m67_002	acR	acR-02f_m67_002.xlsx_RoiSetAuto-27.zip Distance px	24	3539.37	0.693482	300.146	11.7922	300.146
acR-02f_m67_002	acR	acR-02f_m67_002.xlsx_RoiSetAuto-28.zip Distance px	36	4235.25	0.8816	300.146	14.1106	300.146
acR-02f_m67_002	acR	acR-02f_m67_002.xlsx_RoiSetAuto-29.zip Distance px	32	3608.17	0.536801	300.146	12.0214	300.146
acR-02f_m67_002	acR	acR-02f_m67_002.xlsx_RoiSetAuto-3.zip Distance px	48	3544.94	0.835578	300.146	11.8107	300.146
acR-02f_m67_002	acR	acR-02f_m67_002.xlsx_RoiSetAuto-30.zip Distance px	28	3452.26	0.441234	300.146	11.5019	300.146
acR-02f_m67_002	acR	acR-02f_m67_002.xlsx_RoiSetAuto-31.zip Distance px	120	5431.99	0.650401	300.146	18.0979	300.146
acR-02f_m67_002	acR	acR-02f_m67_002.xlsx_RoiSetAuto-32.zip Distance px	80	3963.11	1.16726	300.146	13.204	300.146
acR-02f_m67_002	acR	acR-02f_m67_002.xlsx_RoiSetAuto-34.zip Distance px	32	3069.45	0.954781	300.146	10.2265	300.146
acR-02f_m67_002	acR	acR-02f_m67_002.xlsx_RoiSetAuto-35.zip Distance px	20	2791.06	0.534386	300.146	9.29903	300.146
acR-02f_m67_002	acR	acR-02f_m67_002.xlsx_RoiSetAuto-36.zip Distance px	76	3399.03	0.54775	300.146	11.3246	300.146
acR-02f_m67_002	acR	acR-02f_m67_002.xlsx_RoiSetAuto-37.zip Distance px	28	3380.3	0.421975	300.146	11.2622	300.146
acR-02f_m67_002	acR	acR-02f_m67_002.xlsx_RoiSetAuto-38.zip Distance px	48	4754.16	1.0484	300.146	15.8395	300.146
acR-02f_m67_002	acR	acR-02f_m67_002.xlsx_RoiSetAuto-39.zip Distance px	16	3542.83	0.291606	300.146	11.8037	300.146
acR-02f_m67_002	acR	acR-02f_m67_002.xlsx_RoiSetAuto-4.zip Distance px	40	3796.85	0.891915	300.146	12.65	300.146
acR-02f_m67_002	acR	acR-02f_m67_002.xlsx_RoiSetAuto-40.zip Distance px	48	4313.03	0.759379	300.146	14.3698	300.146
acR-02f_m67_002	acR	acR-02f_m67_002.xlsx_RoiSetAuto-41.zip Distance px	40	3345.12	0.678435	300.146	11.145	300.146
acR-02f_m67_002	acR	acR-02f_m67_002.xlsx_RoiSetAuto-42.zip Distance px	20	2695.7	0.329102	300.146	8.98132	300.146
acR-02f_m67_002	acR	acR-02f_m67_002.xlsx_RoiSetAuto-43.zip Distance px	16	3426.42	0.594482	300.146	11.4159	300.146
acR-02f_m67_002	acR	acR-02f_m67_002.xlsx_RoiSetAuto-44.zip Distance px	36	4500.01	0.936981	300.146	14.9928	300.146
acR-02f_m67_002	acR	acR-02f_m67_002.xlsx_RoiSetAuto-45.zip Distance px	28	3487.08	0.666368	300.146	11.618	300.146
acR-02f_m67_002	acR	acR-02f_m67_002.xlsx_RoiSetAuto-5.zip Distance px	36	4890.27	0.74952	300.146	16.293	300.146
acR-02f_m67_002	acR	acR-02f_m67_002.xlsx_RoiSetAuto-6.zip Distance px	20	3419.35	0.261843	300.146	11.3923	300.146
acR-02f_m67_002	acR	acR-02f_m67_002.xlsx_RoiSetAuto-7.zip Distance px	48	3636.71	0.565378	300.146	12.1165	300.146
acR-02f_m67_002	acR	acR-02f_m67_002.xlsx_RoiSetAuto-8.zip Distance px	32	3637.52	0.80292	300.146	12.1192	300.146
acR-02f_m67_003	acR	acR-02f_m67_003.xlsx_RoiSetAuto-1.zip Distance px	60	2758.85	0.746836	211.98	13.0147	211.98
acR-02f_m67_003	acR	acR-02f_m67_003.xlsx_RoiSetAuto-10.zip Distance px	16	1991.38	0.154548	211.98	9.39418	211.98
acR-02f_m67_003	acR	acR-02f_m67_003.xlsx_RoiSetAuto-11.zip Distance px	20	2572.27	0.528406	211.98	12.1345	211.98
acR-02f_m67_003	acR	acR-02f_m67_003.xlsx_RoiSetAuto-12.zip Distance px	16	6677.47	0.164793	211.98	31.5005	211.98
acR-02f_m67_003	acR	acR-02f_m67_003.xlsx_RoiSetAuto-13.zip Distance px	28	1864.06	0.455493	211.98	8.7936	211.98
acR-02f_m67_003	acR	acR-02f_m67_003.xlsx_RoiSetAuto-14.zip Distance px	76	2758.45	0.788607	211.98	13.0128	211.98
acR-02f_m67_003	acR	acR-02f_m67_003.xlsx_RoiSetAuto-15.zip Distance px	48	2819.5	0.623331	211.98	13.3008	211.98
acR-02f_m67_003	acR	acR-02f_m67_003.xlsx_RoiSetAuto-16.zip Distance px	16	2330.93	0.330158	211.98	10.996	211.98
acR-02f_m67_003	acR	acR-02f_m67_003.xlsx_RoiSetAuto-17.zip Distance px	32	1842.9	1.52938	211.98	8.69377	211.98
acR-02f_m67_003	acR	acR-02f_m67_003.xlsx_RoiSetAuto-18.zip Distance px	44	2099.41	0.933707	211.98	9.90381	211.98
acR-02f_m67_003	acR	acR-02f_m67_003.xlsx_RoiSetAuto-19.zip Distance px	16	2085.52	0.148038	211.98	9.8383	211.98
acR-02f_m67_003	acR	acR-02f_m67_003.xlsx_RoiSetAuto-2.zip Distance px	20	1732.32	0.561344	211.98	8.17208	211.98
acR-02f_m67_003	acR	acR-02f_m67_003.xlsx_RoiSetAuto-20.zip Distance px	16	5069.61	0.203812	211.98	23.9155	211.98
acR-02f_m67_003	acR	acR-02f_m67_003.xlsx_RoiSetAuto-21.zip Distance px	20	2462.21	0.805108	211.98	11.6153	211.98
acR-02f_m67_003	acR	acR-02f_m67_003.xlsx_RoiSetAuto-22.zip Distance px	72	2495.5	1.18559	211.98	11.7724	211.98
acR-02f_m67_003	acR	acR-02f_m67_003.xlsx_RoiSetAuto-23.zip Distance px	16	2341.17	0.294829	211.98	11.0443	211.98
acR-02f_m67_003	acR	acR-02f_m67_003.xlsx_RoiSetAuto-24.zip Distance px	20	2051.95	0.366947	211.98	9.67995	211.98
acR-02f_m67_003	acR	acR-02f_m67_003.xlsx_RoiSetAuto-25.zip Distance px	16	1951.57	0.589247	211.98	9.20638	211.98
acR-02f_m67_003	acR	acR-02f_m67_003.xlsx_RoiSetAuto-26.zip Distance px	44	2336.86	1.00406	211.98	11.024	211.98
acR-02f_m67_003	acR	acR-02f_m67_003.xlsx_RoiSetAuto-27.zip Distance px	144	4092.11	0.841103	211.98	19.3042	211.98
acR-02f_m67_003	acR	acR-02f_m67_003.xlsx_RoiSetAuto-28.zip Distance px	168	2658.51	0.864768	211.98	12.5413	211.98
acR-02f_m67_003	acR	acR-02f_m67_003.xlsx_RoiSetAuto-29.zip Distance px	32	3070.12	0.429049	211.98	14.4831	211.98
acR-02f_m67_003	acR	acR-02f_m67_003.xlsx_RoiSetAuto-3.zip Distance px	24	3078.06	0.921694	211.98	14.5205	211.98
acR-02f_m67_003	acR	acR-02f_m67_003.xlsx_RoiSetAuto-30.zip Distance px	36	2437.92	0.687721	211.98	11.5007	211.98
acR-02f_m67_003	acR	acR-02f_m67_003.xlsx_RoiSetAuto-31.zip Distance px	20	1950.63	0.562012	211.98	9.20197	211.98
acR-02f_m67_003	acR	acR-02f_m67_003.xlsx_RoiSetAuto-32.zip Distance px	36	2956.96	1.15547	211.98	13.9493	211.98
acR-02f_m67_003	acR	acR-02f_m67_003.xlsx_RoiSetAuto-33.zip Distance px	92	2242.93	0.931256	211.98	10.5808	211.98
acR-02f_m67_003	acR	acR-02f_m67_003.xlsx_RoiSetAuto-34.zip Distance px	28	4056.93	0.658474	211.98	19.1383	211.98
acR-02f_m67_003	acR	acR-02f_m67_003.xlsx_RoiSetAuto-35.zip Distance px	32	9974.34	0.602521	211.98	47.0533	211.98
acR-02f_m67_003	acR	acR-02f_m67_003.xlsx_RoiSetAuto-36.zip Distance px	64	2342.5	0.988812	211.98	11.0506	211.98
acR-02f_m67_003	acR	acR-02f_m67_003.xlsx_RoiSetAuto-37.zip Distance px	20	2252.03	1.06052	211.98	10.6238	211.98
acR-02f_m67_003	acR	acR-02f_m67_003.xlsx_RoiSetAuto-38.zip Distance px	28	2432.95	0.264074	211.98	11.4773	211.98
acR-02f_m67_003	acR	acR-02f_m67_003.xlsx_RoiSetAuto-4.zip Distance px	64	3806.07	0.656133	211.98	17.9549	211.98
acR-02f_m67_003	acR	acR-02f_m67_003.xlsx_RoiSetAuto-40.zip Distance px	24	2977.02	0.546699	211.98	14.0439	211.98
acR-02f_m67_003	acR	acR-02f_m67_003.xlsx_RoiSetAuto-41.zip Distance px	52	2138.92	0.417817	211.98	10.0902	211.98
acR-02f_m67_003	acR	acR-02f_m67_003.xlsx_RoiSetAuto-42.zip Distance px	16	1862.71	0.382399	211.98	8.78722	211.98
acR-02f_m67_003	acR	acR-02f_m67_003.xlsx_RoiSetAuto-43.zip Distance px	64	2478.81	1.25716	211.98	11.6936	211.98
acR-02f_m67_003	acR	acR-02f_m67_003.xlsx_RoiSetAuto-44.zip Distance px	28	1941.01	0.747681	211.98	9.1566	211.98
acR-02f_m67_003	acR	acR-02f_m67_003.xlsx_RoiSetAuto-45.zip Distance px	24	5002.69	0.551572	211.98	23.5999	211.98
acR-02f_m67_003	acR	acR-02f_m67_003.xlsx_RoiSetAuto-46.zip Distance px	24	2457.82	0.323058	211.98	11.5946	211.98
acR-02f_m67_003	acR	acR-02f_m67_003.xlsx_RoiSetAuto-48.zip Distance px	44	2742.78	0.864967	211.98	12.9389	211.98
acR-02f_m67_003	acR	acR-02f_m67_003.xlsx_RoiSetAuto-49.zip Distance px	24	4308.97	0.260229	211.98	20.3273	211.98
acR-02f_m67_003	acR	acR-02f_m67_003.xlsx_RoiSetAuto-5.zip Distance px	76	5453.44	0.543236	211.98	25.7262	211.98
acR-02f_m67_003	acR	acR-02f_m67_003.xlsx_RoiSetAuto-50.zip Distance px	20	2746.23	0.823477	211.98	12.9551	211.98
acR-02f_m67_003	acR	acR-02f_m67_003.xlsx_RoiSetAuto-51.zip Distance px	28	2219.2	0.780049	211.98	10.4689	211.98
acR-02f_m67_003	acR	acR-02f_m67_003.xlsx_RoiSetAuto-52.zip Distance px	16	1806.89	0.508413	211.98	8.52388	211.98
acR-02f_m67_003	acR	acR-02f_m67_003.xlsx_RoiSetAuto-53.zip Distance px	24	2040.11	0.9605	211.98	9.62409	211.98
acR-02f_m67_003	acR	acR-02f_m67_003.xlsx_RoiSetAuto-54.zip Distance px	32	8739.24	0.56413	211.98	41.2268	211.98
acR-02f_m67_003	acR	acR-02f_m67_003.xlsx_RoiSetAuto-55.zip Distance px	16	3070.98	0.806447	211.98	14.4872	211.98
acR-02f_m67_003	acR	acR-02f_m67_003.xlsx_RoiSetAuto-57.zip Distance px	16	1840.27	0.8872	211.98	8.68133	211.98
acR-02f_m67_003	acR	acR-02f_m67_003.xlsx_RoiSetAuto-58.zip Distance px	40	5251.78	0.816868	211.98	24.7749	211.98
acR-02f_m67_003	acR	acR-02f_m67_003.xlsx_RoiSetAuto-59.zip Distance px	16	1890.55	0.222716	211.98	8.91856	211.98
acR-02f_m67_003	acR	acR-02f_m67_003.xlsx_RoiSetAuto-6.zip Distance px	20	2698.96	0.603344	211.98	12.7322	211.98
acR-02f_m67_003	acR	acR-02f_m67_003.xlsx_RoiSetAuto-61.zip Distance px	24	2230.43	0.606101	211.98	10.5219	211.98
acR-02f_m67_003	acR	acR-02f_m67_003.xlsx_RoiSetAuto-62.zip Distance px	20	10218.6	0.257486	211.98	48.2056	211.98
acR-02f_m67_003	acR	acR-02f_m67_003.xlsx_RoiSetAuto-63.zip Distance px	40	3216.37	0.631163	211.98	15.173	211.98
acR-02f_m67_003	acR	acR-02f_m67_003.xlsx_RoiSetAuto-64.zip Distance px	56	2638.8	0.777723	211.98	12.4484	211.98
acR-02f_m67_003	acR	acR-02f_m67_003.xlsx_RoiSetAuto-65.zip Distance px	28	4048.16	0.396177	211.98	19.0969	211.98
acR-02f_m67_003	acR	acR-02f_m67_003.xlsx_RoiSetAuto-66.zip Distance px	28	2678.32	0.220377	211.98	12.6348	211.98
acR-02f_m67_003	acR	acR-02f_m67_003.xlsx_RoiSetAuto-68.zip Distance px	28	2754.94	0.819111	211.98	12.9962	211.98
acR-02f_m67_003	acR	acR-02f_m67_003.xlsx_RoiSetAuto-69.zip Distance px	16	4950.34	0.512342	211.98	23.3529	211.98
acR-02f_m67_003	acR	acR-02f_m67_003.xlsx_RoiSetAuto-7.zip Distance px	24	4253.22	0.346685	211.98	20.0643	211.98
acR-02f_m67_003	acR	acR-02f_m67_003.xlsx_RoiSetAuto-70.zip Distance px	16	2720.67	0.390851	211.98	12.8346	211.98
acR-02f_m67_003	acR	acR-02f_m67_003.xlsx_RoiSetAuto-71.zip Distance px	16	2466.88	0.385524	211.98	11.6373	211.98
acR-02f_m67_003	acR	acR-02f_m67_003.xlsx_RoiSetAuto-72.zip Distance px	48	5330.75	0.560494	211.98	25.1474	211.98
acR-02f_m67_003	acR	acR-02f_m67_003.xlsx_RoiSetAuto-73.zip Distance px	60	4082.69	0.726029	211.98	19.2598	211.98
acR-02f_m67_003	acR	acR-02f_m67_003.xlsx_RoiSetAuto-74.zip Distance px	16	1985.74	0.315173	211.98	9.3676	211.98
acR-02f_m67_003	acR	acR-02f_m67_003.xlsx_RoiSetAuto-75.zip Distance px	32	2437.26	0.871338	211.98	11.4976	211.98
acR-02f_m67_003	acR	acR-02f_m67_003.xlsx_RoiSetAuto-77.zip Distance px	16	2032.81	0.786439	211.98	9.58962	211.98
acR-02f_m67_003	acR	acR-02f_m67_003.xlsx_RoiSetAuto-78.zip Distance px	16	2220.21	0.642681	211.98	10.4737	211.98
acR-02f_m67_003	acR	acR-02f_m67_003.xlsx_RoiSetAuto-79.zip Distance px	24	2492.76	0.583908	211.98	11.7594	211.98
acR-02f_m67_003	acR	acR-02f_m67_003.xlsx_RoiSetAuto-8.zip Distance px	20	2290.62	0.377961	211.98	10.8058	211.98
acR-02f_m67_003	acR	acR-02f_m67_003.xlsx_RoiSetAuto-80.zip Distance px	44	11469.6	0.400127	211.98	54.107	211.98
acR-02f_m67_003	acR	acR-02f_m67_003.xlsx_RoiSetAuto-81.zip Distance px	20	1991.83	0.386485	211.98	9.3963	211.98
acR-02f_m67_003	acR	acR-02f_m67_003.xlsx_RoiSetAuto-82.zip Distance px	16	1553.37	0.164007	211.98	7.32789	211.98
acR-02f_m67_003	acR	acR-02f_m67_003.xlsx_RoiSetAuto-83.zip Distance px	20	2564.3	0.782183	211.98	12.0969	211.98
acR-02f_m67_003	acR	acR-02f_m67_003.xlsx_RoiSetAuto-84.zip Distance px	20	2113.79	0.518107	211.98	9.97164	211.98
acR-02f_m67_003	acR	acR-02f_m67_003.xlsx_RoiSetAuto-86.zip Distance px	20	3118.1	0.758333	211.98	14.7094	211.98
acR-02f_m67_003	acR	acR-02f_m67_003.xlsx_RoiSetAuto-9.zip Distance px	16	2622.78	0.264891	211.98	12.3728	211.98
acR-03f_m67_003	acR	acR-03f_m67_003.xlsx_RoiSetAuto-1.zip Distance px	28	3375.03	0.644436	273.105	12.358	273.105
acR-03f_m67_003	acR	acR-03f_m67_003.xlsx_RoiSetAuto-10.zip Distance px	72	3697.64	1.14254	273.105	13.5393	273.105
acR-03f_m67_003	acR	acR-03f_m67_003.xlsx_RoiSetAuto-11.zip Distance px	16	4317.56	0.296207	273.105	15.8092	273.105
acR-03f_m67_003	acR	acR-03f_m67_003.xlsx_RoiSetAuto-13.zip Distance px	16	2765.4	0.33528	273.105	10.1258	273.105
acR-03f_m67_003	acR	acR-03f_m67_003.xlsx_RoiSetAuto-14.zip Distance px	16	4343.41	0.231781	273.105	15.9038	273.105
acR-03f_m67_003	acR	acR-03f_m67_003.xlsx_RoiSetAuto-17.zip Distance px	24	2341.79	0.556148	273.105	8.57468	273.105
acR-03f_m67_003	acR	acR-03f_m67_003.xlsx_RoiSetAuto-18.zip Distance px	48	3393.34	0.921362	273.105	12.425	273.105
acR-03f_m67_003	acR	acR-03f_m67_003.xlsx_RoiSetAuto-2.zip Distance px	44	2818.57	1.01982	273.105	10.3205	273.105
acR-03f_m67_003	acR	acR-03f_m67_003.xlsx_RoiSetAuto-21.zip Distance px	52	4230.33	0.928072	273.105	15.4897	273.105
acR-03f_m67_003	acR	acR-03f_m67_003.xlsx_RoiSetAuto-22.zip Distance px	16	2311.52	0.324598	273.105	8.46387	273.105
acR-03f_m67_003	acR	acR-03f_m67_003.xlsx_RoiSetAuto-23.zip Distance px	16	4095.4	0.52647	273.105	14.9957	273.105
acR-03f_m67_003	acR	acR-03f_m67_003.xlsx_RoiSetAuto-25.zip Distance px	48	4532.54	1.40359	273.105	16.5963	273.105
acR-03f_m67_003	acR	acR-03f_m67_003.xlsx_RoiSetAuto-27.zip Distance px	108	3432.68	1.3094	273.105	12.5691	273.105
acR-03f_m67_003	acR	acR-03f_m67_003.xlsx_RoiSetAuto-28.zip Distance px	56	3450.41	0.789792	273.105	12.634	273.105
acR-03f_m67_003	acR	acR-03f_m67_003.xlsx_RoiSetAuto-3.zip Distance px	20	3255.98	0.684087	273.105	11.9221	273.105
acR-03f_m67_003	acR	acR-03f_m67_003.xlsx_RoiSetAuto-30.zip Distance px	20	2982.74	0.464383	273.105	10.9216	273.105
acR-03f_m67_003	acR	acR-03f_m67_003.xlsx_RoiSetAuto-31.zip Distance px	28	3476.29	0.64764	273.105	12.7288	273.105
acR-03f_m67_003	acR	acR-03f_m67_003.xlsx_RoiSetAuto-32.zip Distance px	28	3340.27	0.733186	273.105	12.2307	273.105
acR-03f_m67_003	acR	acR-03f_m67_003.xlsx_RoiSetAuto-33.zip Distance px	24	3402.12	0.708366	273.105	12.4572	273.105
acR-03f_m67_003	acR	acR-03f_m67_003.xlsx_RoiSetAuto-34.zip Distance px	24	2974.9	0.451652	273.105	10.8929	273.105
acR-03f_m67_003	acR	acR-03f_m67_003.xlsx_RoiSetAuto-35.zip Distance px	16	3251.58	0.370405	273.105	11.906	273.105
acR-03f_m67_003	acR	acR-03f_m67_003.xlsx_RoiSetAuto-36.zip Distance px	16	3360.31	0.215115	273.105	12.3041	273.105
acR-03f_m67_003	acR	acR-03f_m67_003.xlsx_RoiSetAuto-37.zip Distance px	64	3089.63	0.89523	273.105	11.313	273.105
acR-03f_m67_003	acR	acR-03f_m67_003.xlsx_RoiSetAuto-38.zip Distance px	20	2705.27	0.25887	273.105	9.90559	273.105
acR-03f_m67_003	acR	acR-03f_m67_003.xlsx_RoiSetAuto-39.zip Distance px	28	2695.16	0.683918	273.105	9.8686	273.105
acR-03f_m67_003	acR	acR-03f_m67_003.xlsx_RoiSetAuto-4.zip Distance px	60	3570.15	0.63203	273.105	13.0724	273.105
acR-03f_m67_003	acR	acR-03f_m67_003.xlsx_RoiSetAuto-41.zip Distance px	16	4395.54	0.490065	273.105	16.0947	273.105
acR-03f_m67_003	acR	acR-03f_m67_003.xlsx_RoiSetAuto-42.zip Distance px	20	2608.48	0.202292	273.105	9.55119	273.105
acR-03f_m67_003	acR	acR-03f_m67_003.xlsx_RoiSetAuto-43.zip Distance px	16	3393.04	0.474224	273.105	12.424	273.105
acR-03f_m67_003	acR	acR-03f_m67_003.xlsx_RoiSetAuto-44.zip Distance px	40	5131.87	0.64615	273.105	18.7908	273.105
acR-03f_m67_003	acR	acR-03f_m67_003.xlsx_RoiSetAuto-45.zip Distance px	16	2503.59	0.306308	273.105	9.16715	273.105
acR-03f_m67_003	acR	acR-03f_m67_003.xlsx_RoiSetAuto-46.zip Distance px	28	3379.09	0.44499	273.105	12.3728	273.105
acR-03f_m67_003	acR	acR-03f_m67_003.xlsx_RoiSetAuto-47.zip Distance px	20	2698.59	0.333989	273.105	9.88113	273.105
acR-03f_m67_003	acR	acR-03f_m67_003.xlsx_RoiSetAuto-48.zip Distance px	16	2903.59	0.454463	273.105	10.6318	273.105
acR-03f_m67_003	acR	acR-03f_m67_003.xlsx_RoiSetAuto-5.zip Distance px	16	2654.84	0.240543	273.105	9.72095	273.105
acR-03f_m67_003	acR	acR-03f_m67_003.xlsx_RoiSetAuto-7.zip Distance px	36	3143.68	1.05164	273.105	11.5109	273.105
acR-03f_m67_003	acR	acR-03f_m67_003.xlsx_RoiSetAuto-8.zip Distance px	24	4464.95	0.558713	273.105	16.3488	273.105
acR-03f_m67_003	acR	acR-03f_m67_003.xlsx_RoiSetAuto-9.zip Distance px	20	2623.72	0.345564	273.105	9.60702	273.105
acR-04f_m67_001	acR	acR-04f_m67_001.xlsx_RoiSetAuto-1.zip Distance px	100	8122.24	1.09259	378.559	21.4557	378.559
acR-04f_m67_001	acR	acR-04f_m67_001.xlsx_RoiSetAuto-10.zip Distance px	268	8125.24	0.940296	378.559	21.4636	378.559
acR-04f_m67_001	acR	acR-04f_m67_001.xlsx_RoiSetAuto-11.zip Distance px	16	4734.45	0.382473	378.559	12.5065	378.559
acR-04f_m67_001	acR	acR-04f_m67_001.xlsx_RoiSetAuto-12.zip Distance px	20	5784.9	0.38953	378.559	15.2814	378.559
acR-04f_m67_001	acR	acR-04f_m67_001.xlsx_RoiSetAuto-13.zip Distance px	36	4310.48	0.639896	378.559	11.3866	378.559
acR-04f_m67_001	acR	acR-04f_m67_001.xlsx_RoiSetAuto-15.zip Distance px	120	6187.19	1.22897	378.559	16.3441	378.559
acR-04f_m67_001	acR	acR-04f_m67_001.xlsx_RoiSetAuto-16.zip Distance px	20	2952.88	0.528974	378.559	7.80032	378.559
acR-04f_m67_001	acR	acR-04f_m67_001.xlsx_RoiSetAuto-17.zip Distance px	16	3698.69	0.243119	378.559	9.77043	378.559
acR-04f_m67_001	acR	acR-04f_m67_001.xlsx_RoiSetAuto-19.zip Distance px	20	4541.93	0.425614	378.559	11.9979	378.559
acR-04f_m67_001	acR	acR-04f_m67_001.xlsx_RoiSetAuto-2.zip Distance px	20	3657.86	0.381716	378.559	9.6626	378.559
acR-04f_m67_001	acR	acR-04f_m67_001.xlsx_RoiSetAuto-20.zip Distance px	32	5486.92	0.897027	378.559	14.4942	378.559
acR-04f_m67_001	acR	acR-04f_m67_001.xlsx_RoiSetAuto-21.zip Distance px	48	4161.93	0.608985	378.559	10.9941	378.559
acR-04f_m67_001	acR	acR-04f_m67_001.xlsx_RoiSetAuto-22.zip Distance px	36	3351.61	0.71167	378.559	8.8536	378.559
acR-04f_m67_001	acR	acR-04f_m67_001.xlsx_RoiSetAuto-25.zip Distance px	24	3179.06	0.300146	378.559	8.39779	378.559
acR-04f_m67_001	acR	acR-04f_m67_001.xlsx_RoiSetAuto-26.zip Distance px	72	4457.99	1.22528	378.559	11.7762	378.559
acR-04f_m67_001	acR	acR-04f_m67_001.xlsx_RoiSetAuto-28.zip Distance px	40	5054.99	0.53539	378.559	13.3532	378.559
acR-04f_m67_001	acR	acR-04f_m67_001.xlsx_RoiSetAuto-3.zip Distance px	24	3609.94	0.350036	378.559	9.53599	378.559
acR-04f_m67_001	acR	acR-04f_m67_001.xlsx_RoiSetAuto-30.zip Distance px	48	6952.34	0.523887	378.559	18.3653	378.559
acR-04f_m67_001	acR	acR-04f_m67_001.xlsx_RoiSetAuto-31.zip Distance px	24	3777.54	0.70004	378.559	9.97872	378.559
acR-04f_m67_001	acR	acR-04f_m67_001.xlsx_RoiSetAuto-32.zip Distance px	28	3600.87	0.692278	378.559	9.51204	378.559
acR-04f_m67_001	acR	acR-04f_m67_001.xlsx_RoiSetAuto-35.zip Distance px	56	5326.92	0.924433	378.559	14.0716	378.559
acR-04f_m67_001	acR	acR-04f_m67_001.xlsx_RoiSetAuto-36.zip Distance px	32	6024.04	0.870851	378.559	15.9131	378.559
acR-04f_m67_001	acR	acR-04f_m67_001.xlsx_RoiSetAuto-37.zip Distance px	32	3951.73	0.79214	378.559	10.4389	378.559
acR-04f_m67_001	acR	acR-04f_m67_001.xlsx_RoiSetAuto-38.zip Distance px	48	4290.54	0.881113	378.559	11.3339	378.559
acR-04f_m67_001	acR	acR-04f_m67_001.xlsx_RoiSetAuto-39.zip Distance px	52	4239.22	0.825711	378.559	11.1983	378.559
acR-04f_m67_001	acR	acR-04f_m67_001.xlsx_RoiSetAuto-4.zip Distance px	104	8562.02	0.998648	378.559	22.6174	378.559
acR-04f_m67_001	acR	acR-04f_m67_001.xlsx_RoiSetAuto-40.zip Distance px	40	4080.22	0.662317	378.559	10.7783	378.559
acR-04f_m67_001	acR	acR-04f_m67_001.xlsx_RoiSetAuto-41.zip Distance px	40	6621.77	0.5205	378.559	17.4921	378.559
acR-04f_m67_001	acR	acR-04f_m67_001.xlsx_RoiSetAuto-42.zip Distance px	52	4582.72	0.5207	378.559	12.1057	378.559
acR-04f_m67_001	acR	acR-04f_m67_001.xlsx_RoiSetAuto-43.zip Distance px	28	5115.89	0.390379	378.559	13.5141	378.559
acR-04f_m67_001	acR	acR-04f_m67_001.xlsx_RoiSetAuto-45.zip Distance px	24	3596.55	0.588597	378.559	9.50063	378.559
acR-04f_m67_001	acR	acR-04f_m67_001.xlsx_RoiSetAuto-46.zip Distance px	72	5263.74	1.03194	378.559	13.9047	378.559
acR-04f_m67_001	acR	acR-04f_m67_001.xlsx_RoiSetAuto-47.zip Distance px	40	4722.46	0.567425	378.559	12.4748	378.559
acR-04f_m67_001	acR	acR-04f_m67_001.xlsx_RoiSetAuto-48.zip Distance px	56	7178.04	0.634654	378.559	18.9615	378.559
acR-04f_m67_001	acR	acR-04f_m67_001.xlsx_RoiSetAuto-50.zip Distance px	16	3998.39	0.391861	378.559	10.5621	378.559
acR-04f_m67_001	acR	acR-04f_m67_001.xlsx_RoiSetAuto-7.zip Distance px	28	4681.66	0.789476	378.559	12.367	378.559
acR-04f_m67_001	acR	acR-04f_m67_001.xlsx_RoiSetAuto-9.zip Distance px	28	3674.58	0.795601	378.559	9.70675	378.559
acR-04f_m67_002	acR	acR-04f_m67_002.xlsx_RoiSetAuto-1.zip Distance px	44	4557.11	1.00012	291.25	15.6467	291.25
acR-04f_m67_002	acR	acR-04f_m67_002.xlsx_RoiSetAuto-100.zip Distance px	16	4367.71	0.743205	291.25	14.9964	291.25
acR-04f_m67_002	acR	acR-04f_m67_002.xlsx_RoiSetAuto-11.zip Distance px	40	3650.76	0.660556	291.25	12.5348	291.25
acR-04f_m67_002	acR	acR-04f_m67_002.xlsx_RoiSetAuto-12.zip Distance px	20	3106.32	0.431119	291.25	10.6655	291.25
acR-04f_m67_002	acR	acR-04f_m67_002.xlsx_RoiSetAuto-13.zip Distance px	24	2559.08	0.676337	291.25	8.78653	291.25
acR-04f_m67_002	acR	acR-04f_m67_002.xlsx_RoiSetAuto-14.zip Distance px	164	8910.11	1.07183	291.25	30.5926	291.25
acR-04f_m67_002	acR	acR-04f_m67_002.xlsx_RoiSetAuto-15.zip Distance px	68	5133.76	1.09648	291.25	17.6266	291.25
acR-04f_m67_002	acR	acR-04f_m67_002.xlsx_RoiSetAuto-16.zip Distance px	92	5429.5	1.37278	291.25	18.642	291.25
acR-04f_m67_002	acR	acR-04f_m67_002.xlsx_RoiSetAuto-17.zip Distance px	20	4314.6	0.469777	291.25	14.8141	291.25
acR-04f_m67_002	acR	acR-04f_m67_002.xlsx_RoiSetAuto-18.zip Distance px	52	3563.1	0.696234	291.25	12.2338	291.25
acR-04f_m67_002	acR	acR-04f_m67_002.xlsx_RoiSetAuto-19.zip Distance px	40	2611.68	0.780779	291.25	8.96713	291.25
acR-04f_m67_002	acR	acR-04f_m67_002.xlsx_RoiSetAuto-2.zip Distance px	96	5980.27	1.2059	291.25	20.5331	291.25
acR-04f_m67_002	acR	acR-04f_m67_002.xlsx_RoiSetAuto-20.zip Distance px	20	2516.32	0.493651	291.25	8.63971	291.25
acR-04f_m67_002	acR	acR-04f_m67_002.xlsx_RoiSetAuto-21.zip Distance px	44	3963.88	0.756031	291.25	13.6099	291.25
acR-04f_m67_002	acR	acR-04f_m67_002.xlsx_RoiSetAuto-22.zip Distance px	84	6072.97	1.25139	291.25	20.8514	291.25
acR-04f_m67_002	acR	acR-04f_m67_002.xlsx_RoiSetAuto-23.zip Distance px	40	3520.46	0.886744	291.25	12.0874	291.25
acR-04f_m67_002	acR	acR-04f_m67_002.xlsx_RoiSetAuto-24.zip Distance px	44	3516.78	0.975613	291.25	12.0748	291.25
acR-04f_m67_002	acR	acR-04f_m67_002.xlsx_RoiSetAuto-26.zip Distance px	20	2583.45	0.333686	291.25	8.8702	291.25
acR-04f_m67_002	acR	acR-04f_m67_002.xlsx_RoiSetAuto-27.zip Distance px	156	4339	0.950828	291.25	14.8978	291.25
acR-04f_m67_002	acR	acR-04f_m67_002.xlsx_RoiSetAuto-28.zip Distance px	80	3412.25	0.730594	291.25	11.7159	291.25
acR-04f_m67_002	acR	acR-04f_m67_002.xlsx_RoiSetAuto-29.zip Distance px	20	3836.3	0.372171	291.25	13.1718	291.25
acR-04f_m67_002	acR	acR-04f_m67_002.xlsx_RoiSetAuto-30.zip Distance px	32	3758.36	0.720546	291.25	12.9042	291.25
acR-04f_m67_002	acR	acR-04f_m67_002.xlsx_RoiSetAuto-32.zip Distance px	60	3101.58	0.745403	291.25	10.6492	291.25
acR-04f_m67_002	acR	acR-04f_m67_002.xlsx_RoiSetAuto-33.zip Distance px	16	2437.67	0.453932	291.25	8.36968	291.25
acR-04f_m67_002	acR	acR-04f_m67_002.xlsx_RoiSetAuto-35.zip Distance px	28	3084.7	0.394353	291.25	10.5912	291.25
acR-04f_m67_002	acR	acR-04f_m67_002.xlsx_RoiSetAuto-37.zip Distance px	44	3605.58	0.757722	291.25	12.3797	291.25
acR-04f_m67_002	acR	acR-04f_m67_002.xlsx_RoiSetAuto-38.zip Distance px	44	3330.3	0.928823	291.25	11.4345	291.25
acR-04f_m67_002	acR	acR-04f_m67_002.xlsx_RoiSetAuto-39.zip Distance px	92	4797.24	1.30619	291.25	16.4712	291.25
acR-04f_m67_002	acR	acR-04f_m67_002.xlsx_RoiSetAuto-4.zip Distance px	88	4102.89	0.758397	291.25	14.0871	291.25
acR-04f_m67_002	acR	acR-04f_m67_002.xlsx_RoiSetAuto-42.zip Distance px	16	3424.09	1.63253	291.25	11.7565	291.25
acR-04f_m67_002	acR	acR-04f_m67_002.xlsx_RoiSetAuto-43.zip Distance px	28	3616.43	0.46562	291.25	12.4169	291.25
acR-04f_m67_002	acR	acR-04f_m67_002.xlsx_RoiSetAuto-44.zip Distance px	20	2888.36	0.545963	291.25	9.91711	291.25
acR-04f_m67_002	acR	acR-04f_m67_002.xlsx_RoiSetAuto-45.zip Distance px	28	2891.46	0.454495	291.25	9.92774	291.25
acR-04f_m67_002	acR	acR-04f_m67_002.xlsx_RoiSetAuto-46.zip Distance px	80	4290.73	0.957035	291.25	14.7321	291.25
acR-04f_m67_002	acR	acR-04f_m67_002.xlsx_RoiSetAuto-47.zip Distance px	60	3787.87	0.939934	291.25	13.0055	291.25
acR-04f_m67_002	acR	acR-04f_m67_002.xlsx_RoiSetAuto-49.zip Distance px	132	5685.74	1.26883	291.25	19.5218	291.25
acR-04f_m67_002	acR	acR-04f_m67_002.xlsx_RoiSetAuto-5.zip Distance px	16	3911.17	0.152886	291.25	13.4289	291.25
acR-04f_m67_002	acR	acR-04f_m67_002.xlsx_RoiSetAuto-50.zip Distance px	28	3026.28	0.470895	291.25	10.3906	291.25
acR-04f_m67_002	acR	acR-04f_m67_002.xlsx_RoiSetAuto-51.zip Distance px	20	3194.59	0.505427	291.25	10.9685	291.25
acR-04f_m67_002	acR	acR-04f_m67_002.xlsx_RoiSetAuto-52.zip Distance px	16	2357.67	0.793979	291.25	8.09498	291.25
acR-04f_m67_002	acR	acR-04f_m67_002.xlsx_RoiSetAuto-54.zip Distance px	40	3034.59	1.44171	291.25	10.4192	291.25
acR-04f_m67_002	acR	acR-04f_m67_002.xlsx_RoiSetAuto-55.zip Distance px	40	3368.3	0.796113	291.25	11.565	291.25
acR-04f_m67_002	acR	acR-04f_m67_002.xlsx_RoiSetAuto-56.zip Distance px	44	3824.65	1.02026	291.25	13.1318	291.25
acR-04f_m67_002	acR	acR-04f_m67_002.xlsx_RoiSetAuto-58.zip Distance px	36	5782.11	1.37323	291.25	19.8527	291.25
acR-04f_m67_002	acR	acR-04f_m67_002.xlsx_RoiSetAuto-60.zip Distance px	96	4607.63	0.931737	291.25	15.8202	291.25
acR-04f_m67_002	acR	acR-04f_m67_002.xlsx_RoiSetAuto-61.zip Distance px	16	3417.4	0.633632	291.25	11.7335	291.25
acR-04f_m67_002	acR	acR-04f_m67_002.xlsx_RoiSetAuto-64.zip Distance px	40	3531.55	0.857738	291.25	12.1255	291.25
acR-04f_m67_002	acR	acR-04f_m67_002.xlsx_RoiSetAuto-65.zip Distance px	20	3312.03	0.65494	291.25	11.3718	291.25
acR-04f_m67_002	acR	acR-04f_m67_002.xlsx_RoiSetAuto-66.zip Distance px	16	2718.78	0.644338	291.25	9.33487	291.25
acR-04f_m67_002	acR	acR-04f_m67_002.xlsx_RoiSetAuto-68.zip Distance px	64	5333.85	0.738927	291.25	18.3136	291.25
acR-04f_m67_002	acR	acR-04f_m67_002.xlsx_RoiSetAuto-69.zip Distance px	40	3164.61	0.39364	291.25	10.8656	291.25
acR-04f_m67_002	acR	acR-04f_m67_002.xlsx_RoiSetAuto-7.zip Distance px	32	3756.12	0.612131	291.25	12.8965	291.25
acR-04f_m67_002	acR	acR-04f_m67_002.xlsx_RoiSetAuto-71.zip Distance px	16	3008.38	0.514066	291.25	10.3292	291.25
acR-04f_m67_002	acR	acR-04f_m67_002.xlsx_RoiSetAuto-72.zip Distance px	16	2815.24	0.381258	291.25	9.66603	291.25
acR-04f_m67_002	acR	acR-04f_m67_002.xlsx_RoiSetAuto-74.zip Distance px	32	3187.2	0.413148	291.25	10.9431	291.25
acR-04f_m67_002	acR	acR-04f_m67_002.xlsx_RoiSetAuto-75.zip Distance px	16	3074.42	0.322339	291.25	10.5559	291.25
acR-04f_m67_002	acR	acR-04f_m67_002.xlsx_RoiSetAuto-76.zip Distance px	32	3993.66	0.473758	291.25	13.7121	291.25
acR-04f_m67_002	acR	acR-04f_m67_002.xlsx_RoiSetAuto-78.zip Distance px	24	2601.52	0.692679	291.25	8.93223	291.25
acR-04f_m67_002	acR	acR-04f_m67_002.xlsx_RoiSetAuto-79.zip Distance px	16	3035.97	0.730392	291.25	10.4239	291.25
acR-04f_m67_002	acR	acR-04f_m67_002.xlsx_RoiSetAuto-8.zip Distance px	32	2305.89	0.847251	291.25	7.91719	291.25
acR-04f_m67_002	acR	acR-04f_m67_002.xlsx_RoiSetAuto-80.zip Distance px	64	3722.02	0.850547	291.25	12.7794	291.25
acR-04f_m67_002	acR	acR-04f_m67_002.xlsx_RoiSetAuto-81.zip Distance px	20	3817.12	0.533746	291.25	13.106	291.25
acR-04f_m67_002	acR	acR-04f_m67_002.xlsx_RoiSetAuto-82.zip Distance px	56	4459.54	1.49426	291.25	15.3117	291.25
acR-04f_m67_002	acR	acR-04f_m67_002.xlsx_RoiSetAuto-83.zip Distance px	16	2851.12	0.218082	291.25	9.78924	291.25
acR-04f_m67_002	acR	acR-04f_m67_002.xlsx_RoiSetAuto-84.zip Distance px	36	2995.02	0.575307	291.25	10.2833	291.25
acR-04f_m67_002	acR	acR-04f_m67_002.xlsx_RoiSetAuto-85.zip Distance px	16	3212.7	0.325724	291.25	11.0307	291.25
acR-04f_m67_002	acR	acR-04f_m67_002.xlsx_RoiSetAuto-86.zip Distance px	36	7034.2	0.871926	291.25	24.1517	291.25
acR-04f_m67_002	acR	acR-04f_m67_002.xlsx_RoiSetAuto-87.zip Distance px	36	4799.84	0.720527	291.25	16.4801	291.25
acR-04f_m67_002	acR	acR-04f_m67_002.xlsx_RoiSetAuto-88.zip Distance px	16	3053.63	0.262907	291.25	10.4845	291.25
acR-04f_m67_002	acR	acR-04f_m67_002.xlsx_RoiSetAuto-89.zip Distance px	48	6287.47	1.31042	291.25	21.5878	291.25
acR-04f_m67_002	acR	acR-04f_m67_002.xlsx_RoiSetAuto-90.zip Distance px	44	2931.37	0.732757	291.25	10.0648	291.25
acR-04f_m67_002	acR	acR-04f_m67_002.xlsx_RoiSetAuto-91.zip Distance px	20	3083.66	0.320574	291.25	10.5876	291.25
acR-04f_m67_002	acR	acR-04f_m67_002.xlsx_RoiSetAuto-92.zip Distance px	32	4628.48	0.519975	291.25	15.8918	291.25
acR-04f_m67_002	acR	acR-04f_m67_002.xlsx_RoiSetAuto-93.zip Distance px	20	3218.7	0.332625	291.25	11.0513	291.25
acR-04f_m67_002	acR	acR-04f_m67_002.xlsx_RoiSetAuto-94.zip Distance px	24	2548.4	0.626276	291.25	8.74985	291.25
acR-04f_m67_002	acR	acR-04f_m67_002.xlsx_RoiSetAuto-95.zip Distance px	16	3831.44	0.517679	291.25	13.1551	291.25
acR-04f_m67_002	acR	acR-04f_m67_002.xlsx_RoiSetAuto-96.zip Distance px	24	3845.38	0.593239	291.25	13.203	291.25
acR-04f_m67_002	acR	acR-04f_m67_002.xlsx_RoiSetAuto-97.zip Distance px	28	3549.49	0.64701	291.25	12.1871	291.25
acR-04f_m67_002	acR	acR-04f_m67_002.xlsx_RoiSetAuto-98.zip Distance px	16	2411.48	0.380599	291.25	8.27975	291.25
acR-04f_m67_002	acR	acR-04f_m67_002.xlsx_RoiSetAuto-99.zip Distance px	20	3549.27	0.489464	291.25	12.1863	291.25
acR-04f_m67_003	acR	acR-04f_m67_003.xlsx_RoiSetAuto-1.zip Distance px	124	4835.95	0.939586	302.483	15.9875	302.483
acR-04f_m67_003	acR	acR-04f_m67_003.xlsx_RoiSetAuto-10.zip Distance px	28	4101.77	0.44871	302.483	13.5603	302.483
acR-04f_m67_003	acR	acR-04f_m67_003.xlsx_RoiSetAuto-11.zip Distance px	100	4778.4	1.19314	302.483	15.7972	302.483
acR-04f_m67_003	acR	acR-04f_m67_003.xlsx_RoiSetAuto-12.zip Distance px	40	3976.63	0.566592	302.483	13.1466	302.483
acR-04f_m67_003	acR	acR-04f_m67_003.xlsx_RoiSetAuto-14.zip Distance px	48	4910.46	0.798761	302.483	16.2338	302.483
acR-04f_m67_003	acR	acR-04f_m67_003.xlsx_RoiSetAuto-16.zip Distance px	72	3411.67	0.684532	302.483	11.2789	302.483
acR-04f_m67_003	acR	acR-04f_m67_003.xlsx_RoiSetAuto-18.zip Distance px	28	4168.91	0.950184	302.483	13.7823	302.483
acR-04f_m67_003	acR	acR-04f_m67_003.xlsx_RoiSetAuto-2.zip Distance px	40	4155.36	1.04158	302.483	13.7375	302.483
acR-04f_m67_003	acR	acR-04f_m67_003.xlsx_RoiSetAuto-20.zip Distance px	44	2808.94	0.848043	302.483	9.28627	302.483
acR-04f_m67_003	acR	acR-04f_m67_003.xlsx_RoiSetAuto-21.zip Distance px	164	3910.98	1.09262	302.483	12.9296	302.483
acR-04f_m67_003	acR	acR-04f_m67_003.xlsx_RoiSetAuto-22.zip Distance px	216	6518.51	1.38366	302.483	21.55	302.483
acR-04f_m67_003	acR	acR-04f_m67_003.xlsx_RoiSetAuto-25.zip Distance px	28	3620.52	0.80606	302.483	11.9693	302.483
acR-04f_m67_003	acR	acR-04f_m67_003.xlsx_RoiSetAuto-26.zip Distance px	44	3934.64	0.744238	302.483	13.0078	302.483
acR-04f_m67_003	acR	acR-04f_m67_003.xlsx_RoiSetAuto-27.zip Distance px	196	5707.23	1.11462	302.483	18.8679	302.483
acR-04f_m67_003	acR	acR-04f_m67_003.xlsx_RoiSetAuto-3.zip Distance px	96	4233.84	1.6254	302.483	13.9969	302.483
acR-04f_m67_003	acR	acR-04f_m67_003.xlsx_RoiSetAuto-30.zip Distance px	48	3221.5	0.613114	302.483	10.6502	302.483
acR-04f_m67_003	acR	acR-04f_m67_003.xlsx_RoiSetAuto-32.zip Distance px	40	3444.92	0.519556	302.483	11.3888	302.483
acR-04f_m67_003	acR	acR-04f_m67_003.xlsx_RoiSetAuto-36.zip Distance px	40	4214.56	1.10351	302.483	13.9332	302.483
acR-04f_m67_003	acR	acR-04f_m67_003.xlsx_RoiSetAuto-37.zip Distance px	36	3333.41	0.526445	302.483	11.0201	302.483
acR-04f_m67_003	acR	acR-04f_m67_003.xlsx_RoiSetAuto-38.zip Distance px	20	2997.38	0.544227	302.483	9.90924	302.483
acR-04f_m67_003	acR	acR-04f_m67_003.xlsx_RoiSetAuto-39.zip Distance px	24	2808.18	0.405491	302.483	9.28376	302.483
acR-04f_m67_003	acR	acR-04f_m67_003.xlsx_RoiSetAuto-4.zip Distance px	128	4299.4	1.08991	302.483	14.2137	302.483
acR-04f_m67_003	acR	acR-04f_m67_003.xlsx_RoiSetAuto-40.zip Distance px	28	3603.08	0.652897	302.483	11.9117	302.483
acR-04f_m67_003	acR	acR-04f_m67_003.xlsx_RoiSetAuto-41.zip Distance px	20	3324.75	0.667509	302.483	10.9915	302.483
acR-04f_m67_003	acR	acR-04f_m67_003.xlsx_RoiSetAuto-43.zip Distance px	24	3614.73	0.80223	302.483	11.9502	302.483
acR-04f_m67_003	acR	acR-04f_m67_003.xlsx_RoiSetAuto-45.zip Distance px	160	4489.15	0.992694	302.483	14.841	302.483
acR-04f_m67_003	acR	acR-04f_m67_003.xlsx_RoiSetAuto-47.zip Distance px	56	4405.91	1.04526	302.483	14.5658	302.483
acR-04f_m67_003	acR	acR-04f_m67_003.xlsx_RoiSetAuto-5.zip Distance px	64	5215.13	0.849385	302.483	17.241	302.483
acR-04f_m67_003	acR	acR-04f_m67_003.xlsx_RoiSetAuto-50.zip Distance px	88	5599.15	1.15497	302.483	18.5106	302.483
acR-04f_m67_003	acR	acR-04f_m67_003.xlsx_RoiSetAuto-53.zip Distance px	32	2804.37	0.772599	302.483	9.27115	302.483
acR-04f_m67_003	acR	acR-04f_m67_003.xlsx_RoiSetAuto-56.zip Distance px	124	3718.42	0.795598	302.483	12.293	302.483
acR-04f_m67_003	acR	acR-04f_m67_003.xlsx_RoiSetAuto-57.zip Distance px	28	3652.02	0.498577	302.483	12.0735	302.483
acR-04f_m67_003	acR	acR-04f_m67_003.xlsx_RoiSetAuto-58.zip Distance px	88	3983.74	1.18277	302.483	13.1701	302.483
acR-04f_m67_003	acR	acR-04f_m67_003.xlsx_RoiSetAuto-60.zip Distance px	60	4675.56	0.93769	302.483	15.4572	302.483
acR-04f_m67_003	acR	acR-04f_m67_003.xlsx_RoiSetAuto-61.zip Distance px	44	3625.43	0.544179	302.483	11.9856	302.483
acR-04f_m67_003	acR	acR-04f_m67_003.xlsx_RoiSetAuto-63.zip Distance px	84	6647.21	1.32807	302.483	21.9754	302.483
acR-04f_m67_003	acR	acR-04f_m67_003.xlsx_RoiSetAuto-64.zip Distance px	36	3653.29	0.552509	302.483	12.0777	302.483
acR-04f_m67_003	acR	acR-04f_m67_003.xlsx_RoiSetAuto-65.zip Distance px	16	2278.61	0.359499	302.483	7.53302	302.483
acR-04f_m67_003	acR	acR-04f_m67_003.xlsx_RoiSetAuto-66.zip Distance px	16	3784.18	0.442716	302.483	12.5104	302.483
acR-04f_m67_003	acR	acR-04f_m67_003.xlsx_RoiSetAuto-68.zip Distance px	40	3507.37	0.561368	302.483	11.5952	302.483
acR-04f_m67_003	acR	acR-04f_m67_003.xlsx_RoiSetAuto-69.zip Distance px	56	3418.09	0.657591	302.483	11.3001	302.483
acR-04f_m67_003	acR	acR-04f_m67_003.xlsx_RoiSetAuto-7.zip Distance px	72	6043.86	0.751538	302.483	19.9808	302.483
acR-04f_m67_003	acR	acR-04f_m67_003.xlsx_RoiSetAuto-70.zip Distance px	36	2919.46	1.0572	302.483	9.65164	302.483
acR-04f_m67_003	acR	acR-04f_m67_003.xlsx_RoiSetAuto-71.zip Distance px	60	5686.88	1.08759	302.483	18.8006	302.483
acR-04f_m67_003	acR	acR-04f_m67_003.xlsx_RoiSetAuto-73.zip Distance px	40	3108.87	0.729761	302.483	10.2778	302.483
acR-04f_m67_003	acR	acR-04f_m67_003.xlsx_RoiSetAuto-75.zip Distance px	16	3309.89	0.664841	302.483	10.9424	302.483
acR-04f_m67_003	acR	acR-04f_m67_003.xlsx_RoiSetAuto-77.zip Distance px	24	3567.11	0.546212	302.483	11.7927	302.483
acR-04f_m67_003	acR	acR-04f_m67_003.xlsx_RoiSetAuto-79.zip Distance px	20	3829.49	0.799599	302.483	12.6602	302.483
acR-04f_m67_003	acR	acR-04f_m67_003.xlsx_RoiSetAuto-80.zip Distance px	16	3500.46	0.49842	302.483	11.5724	302.483
AcR-05f_m67_002	AcR	AcR-05f_m67_002.xlsx_RoiSetAuto-1.zip Distance px	132	4525.47	0.994626	323.299	13.9978	323.299
AcR-05f_m67_002	AcR	AcR-05f_m67_002.xlsx_RoiSetAuto-10.zip Distance px	16	3233.86	0.163113	323.299	10.0027	323.299
AcR-05f_m67_002	AcR	AcR-05f_m67_002.xlsx_RoiSetAuto-11.zip Distance px	224	5077.13	0.820838	323.299	15.7041	323.299
AcR-05f_m67_002	AcR	AcR-05f_m67_002.xlsx_RoiSetAuto-12.zip Distance px	20	3254.35	0.609454	323.299	10.0661	323.299
AcR-05f_m67_002	AcR	AcR-05f_m67_002.xlsx_RoiSetAuto-13.zip Distance px	44	3564	0.686725	323.299	11.0239	323.299
AcR-05f_m67_002	AcR	AcR-05f_m67_002.xlsx_RoiSetAuto-14.zip Distance px	20	2168.07	0.508304	323.299	6.7061	323.299
AcR-05f_m67_002	AcR	AcR-05f_m67_002.xlsx_RoiSetAuto-15.zip Distance px	60	4792.37	0.960964	323.299	14.8234	323.299
AcR-05f_m67_002	AcR	AcR-05f_m67_002.xlsx_RoiSetAuto-16.zip Distance px	20	3016.17	0.411919	323.299	9.32938	323.299
AcR-05f_m67_002	AcR	AcR-05f_m67_002.xlsx_RoiSetAuto-17.zip Distance px	16	3054.34	0.552695	323.299	9.44743	323.299
AcR-05f_m67_002	AcR	AcR-05f_m67_002.xlsx_RoiSetAuto-18.zip Distance px	40	3934.33	0.724086	323.299	12.1693	323.299
AcR-05f_m67_002	AcR	AcR-05f_m67_002.xlsx_RoiSetAuto-19.zip Distance px	36	3846.61	0.836101	323.299	11.898	323.299
AcR-05f_m67_002	AcR	AcR-05f_m67_002.xlsx_RoiSetAuto-2.zip Distance px	24	4809.09	0.739031	323.299	14.8751	323.299
AcR-05f_m67_002	AcR	AcR-05f_m67_002.xlsx_RoiSetAuto-20.zip Distance px	32	3417.76	0.528336	323.299	10.5715	323.299
AcR-05f_m67_002	AcR	AcR-05f_m67_002.xlsx_RoiSetAuto-21.zip Distance px	28	3484.3	0.577341	323.299	10.7773	323.299
AcR-05f_m67_002	AcR	AcR-05f_m67_002.xlsx_RoiSetAuto-22.zip Distance px	28	4142.41	0.768787	323.299	12.813	323.299
AcR-05f_m67_002	AcR	AcR-05f_m67_002.xlsx_RoiSetAuto-23.zip Distance px	76	4148.67	0.640316	323.299	12.8323	323.299
AcR-05f_m67_002	AcR	AcR-05f_m67_002.xlsx_RoiSetAuto-24.zip Distance px	16	3163.08	0.505279	323.299	9.78378	323.299
AcR-05f_m67_002	AcR	AcR-05f_m67_002.xlsx_RoiSetAuto-25.zip Distance px	16	3368.97	0.54098	323.299	10.4206	323.299
AcR-05f_m67_002	AcR	AcR-05f_m67_002.xlsx_RoiSetAuto-26.zip Distance px	88	4615.33	0.850715	323.299	14.2758	323.299
AcR-05f_m67_002	AcR	AcR-05f_m67_002.xlsx_RoiSetAuto-27.zip Distance px	124	4322.33	0.61836	323.299	13.3695	323.299
AcR-05f_m67_002	AcR	AcR-05f_m67_002.xlsx_RoiSetAuto-28.zip Distance px	48	4142.37	0.950083	323.299	12.8128	323.299
AcR-05f_m67_002	AcR	AcR-05f_m67_002.xlsx_RoiSetAuto-29.zip Distance px	68	4620.92	0.760948	323.299	14.293	323.299
AcR-05f_m67_002	AcR	AcR-05f_m67_002.xlsx_RoiSetAuto-3.zip Distance px	132	7961.86	1.55609	323.299	24.6269	323.299
AcR-05f_m67_002	AcR	AcR-05f_m67_002.xlsx_RoiSetAuto-30.zip Distance px	48	3947.26	0.729098	323.299	12.2093	323.299
AcR-05f_m67_002	AcR	AcR-05f_m67_002.xlsx_RoiSetAuto-31.zip Distance px	32	3175.08	0.687985	323.299	9.82088	323.299
AcR-05f_m67_002	AcR	AcR-05f_m67_002.xlsx_RoiSetAuto-32.zip Distance px	40	3920.59	0.66843	323.299	12.1268	323.299
AcR-05f_m67_002	AcR	AcR-05f_m67_002.xlsx_RoiSetAuto-33.zip Distance px	28	3646.44	0.285274	323.299	11.2789	323.299
AcR-05f_m67_002	AcR	AcR-05f_m67_002.xlsx_RoiSetAuto-34.zip Distance px	32	3180.25	0.544925	323.299	9.83689	323.299
AcR-05f_m67_002	AcR	AcR-05f_m67_002.xlsx_RoiSetAuto-35.zip Distance px	40	3490.98	0.602807	323.299	10.798	323.299
AcR-05f_m67_002	AcR	AcR-05f_m67_002.xlsx_RoiSetAuto-36.zip Distance px	24	2849.49	0.889705	323.299	8.8138	323.299
AcR-05f_m67_002	AcR	AcR-05f_m67_002.xlsx_RoiSetAuto-37.zip Distance px	52	3971.79	0.573061	323.299	12.2852	323.299
AcR-05f_m67_002	AcR	AcR-05f_m67_002.xlsx_RoiSetAuto-38.zip Distance px	32	4348.44	0.826225	323.299	13.4502	323.299
AcR-05f_m67_002	AcR	AcR-05f_m67_002.xlsx_RoiSetAuto-39.zip Distance px	20	3555.62	0.696419	323.299	10.9979	323.299
AcR-05f_m67_002	AcR	AcR-05f_m67_002.xlsx_RoiSetAuto-4.zip Distance px	36	3720.82	0.410915	323.299	11.5089	323.299
AcR-05f_m67_002	AcR	AcR-05f_m67_002.xlsx_RoiSetAuto-40.zip Distance px	16	3419.3	0.432743	323.299	10.5763	323.299
AcR-05f_m67_002	AcR	AcR-05f_m67_002.xlsx_RoiSetAuto-41.zip Distance px	28	4867.88	0.593353	323.299	15.0569	323.299
AcR-05f_m67_002	AcR	AcR-05f_m67_002.xlsx_RoiSetAuto-42.zip Distance px	24	3177.51	0.343422	323.299	9.8284	323.299
AcR-05f_m67_002	AcR	AcR-05f_m67_002.xlsx_RoiSetAuto-43.zip Distance px	16	3241.85	0.295233	323.299	10.0274	323.299
AcR-05f_m67_002	AcR	AcR-05f_m67_002.xlsx_RoiSetAuto-44.zip Distance px	16	2594.62	0.628976	323.299	8.02547	323.299
AcR-05f_m67_002	AcR	AcR-05f_m67_002.xlsx_RoiSetAuto-5.zip Distance px	72	4669.07	0.619177	323.299	14.442	323.299
AcR-05f_m67_002	AcR	AcR-05f_m67_002.xlsx_RoiSetAuto-6.zip Distance px	144	4364.55	0.862724	323.299	13.5001	323.299
AcR-05f_m67_002	AcR	AcR-05f_m67_002.xlsx_RoiSetAuto-7.zip Distance px	44	3568.53	0.719052	323.299	11.0379	323.299
AcR-05f_m67_002	AcR	AcR-05f_m67_002.xlsx_RoiSetAuto-8.zip Distance px	16	5097.31	0.397462	323.299	15.7666	323.299
AcR-05f_m67_002	AcR	AcR-05f_m67_002.xlsx_RoiSetAuto-9.zip Distance px	16	3066.91	0.442581	323.299	9.48629	323.299
AcR-05f_m67_003	AcR	AcR-05f_m67_003.xlsx_RoiSetAuto-1.zip Distance px	16	1719.51	0.920947	206.804	8.31471	206.804
AcR-05f_m67_003	AcR	AcR-05f_m67_003.xlsx_RoiSetAuto-10.zip Distance px	16	2221.48	0.240789	206.804	10.742	206.804
AcR-05f_m67_003	AcR	AcR-05f_m67_003.xlsx_RoiSetAuto-11.zip Distance px	48	2256.07	0.577983	206.804	10.9092	206.804
AcR-05f_m67_003	AcR	AcR-05f_m67_003.xlsx_RoiSetAuto-12.zip Distance px	24	2183.17	0.955139	206.804	10.5567	206.804
AcR-05f_m67_003	AcR	AcR-05f_m67_003.xlsx_RoiSetAuto-13.zip Distance px	128	2343.27	0.97591	206.804	11.3309	206.804
AcR-05f_m67_003	AcR	AcR-05f_m67_003.xlsx_RoiSetAuto-14.zip Distance px	36	3484.96	0.853351	206.804	16.8515	206.804
AcR-05f_m67_003	AcR	AcR-05f_m67_003.xlsx_RoiSetAuto-15.zip Distance px	16	2696.22	0.730328	206.804	13.0376	206.804
AcR-05f_m67_003	AcR	AcR-05f_m67_003.xlsx_RoiSetAuto-16.zip Distance px	48	2887.44	1.29622	206.804	13.9622	206.804
AcR-05f_m67_003	AcR	AcR-05f_m67_003.xlsx_RoiSetAuto-18.zip Distance px	60	2784.32	1.10453	206.804	13.4636	206.804
AcR-05f_m67_003	AcR	AcR-05f_m67_003.xlsx_RoiSetAuto-19.zip Distance px	64	2426.63	0.87158	206.804	11.734	206.804
AcR-05f_m67_003	AcR	AcR-05f_m67_003.xlsx_RoiSetAuto-2.zip Distance px	28	2310.47	0.578217	206.804	11.1723	206.804
AcR-05f_m67_003	AcR	AcR-05f_m67_003.xlsx_RoiSetAuto-20.zip Distance px	24	2450.08	0.578998	206.804	11.8474	206.804
AcR-05f_m67_003	AcR	AcR-05f_m67_003.xlsx_RoiSetAuto-21.zip Distance px	16	1945.56	0.711378	206.804	9.40774	206.804
AcR-05f_m67_003	AcR	AcR-05f_m67_003.xlsx_RoiSetAuto-22.zip Distance px	32	1874.86	1.0891	206.804	9.06589	206.804
AcR-05f_m67_003	AcR	AcR-05f_m67_003.xlsx_RoiSetAuto-23.zip Distance px	16	2388.97	0.339577	206.804	11.5519	206.804
AcR-05f_m67_003	AcR	AcR-05f_m67_003.xlsx_RoiSetAuto-24.zip Distance px	32	2047.57	0.483436	206.804	9.90101	206.804
AcR-05f_m67_003	AcR	AcR-05f_m67_003.xlsx_RoiSetAuto-25.zip Distance px	24	1816.25	0.672652	206.804	8.78248	206.804
AcR-05f_m67_003	AcR	AcR-05f_m67_003.xlsx_RoiSetAuto-26.zip Distance px	44	2118.01	0.936279	206.804	10.2416	206.804
AcR-05f_m67_003	AcR	AcR-05f_m67_003.xlsx_RoiSetAuto-28.zip Distance px	28	2065.53	0.708585	206.804	9.98785	206.804
AcR-05f_m67_003	AcR	AcR-05f_m67_003.xlsx_RoiSetAuto-29.zip Distance px	24	2150.21	0.413327	206.804	10.3973	206.804
AcR-05f_m67_003	AcR	AcR-05f_m67_003.xlsx_RoiSetAuto-3.zip Distance px	32	2426.37	0.873087	206.804	11.7327	206.804
AcR-05f_m67_003	AcR	AcR-05f_m67_003.xlsx_RoiSetAuto-30.zip Distance px	16	2421.6	0.66113	206.804	11.7096	206.804
AcR-05f_m67_003	AcR	AcR-05f_m67_003.xlsx_RoiSetAuto-31.zip Distance px	40	2185.87	0.992271	206.804	10.5698	206.804
AcR-05f_m67_003	AcR	AcR-05f_m67_003.xlsx_RoiSetAuto-32.zip Distance px	16	2113.62	0.31626	206.804	10.2204	206.804
AcR-05f_m67_003	AcR	AcR-05f_m67_003.xlsx_RoiSetAuto-33.zip Distance px	16	2002.98	0.662255	206.804	9.68543	206.804
AcR-05f_m67_003	AcR	AcR-05f_m67_003.xlsx_RoiSetAuto-34.zip Distance px	24	2301.3	0.794039	206.804	11.128	206.804
AcR-05f_m67_003	AcR	AcR-05f_m67_003.xlsx_RoiSetAuto-35.zip Distance px	20	2259.27	0.251797	206.804	10.9247	206.804
AcR-05f_m67_003	AcR	AcR-05f_m67_003.xlsx_RoiSetAuto-36.zip Distance px	52	2403.72	0.887454	206.804	11.6232	206.804
AcR-05f_m67_003	AcR	AcR-05f_m67_003.xlsx_RoiSetAuto-37.zip Distance px	16	2206.63	0.873704	206.804	10.6702	206.804
AcR-05f_m67_003	AcR	AcR-05f_m67_003.xlsx_RoiSetAuto-38.zip Distance px	52	2728.57	1.03409	206.804	13.194	206.804
AcR-05f_m67_003	AcR	AcR-05f_m67_003.xlsx_RoiSetAuto-39.zip Distance px	16	2267.8	0.526452	206.804	10.966	206.804
AcR-05f_m67_003	AcR	AcR-05f_m67_003.xlsx_RoiSetAuto-4.zip Distance px	52	2124.11	0.97551	206.804	10.2711	206.804
AcR-05f_m67_003	AcR	AcR-05f_m67_003.xlsx_RoiSetAuto-40.zip Distance px	40	2310.31	0.842019	206.804	11.1715	206.804
AcR-05f_m67_003	AcR	AcR-05f_m67_003.xlsx_RoiSetAuto-41.zip Distance px	44	2996.22	0.688784	206.804	14.4882	206.804
AcR-05f_m67_003	AcR	AcR-05f_m67_003.xlsx_RoiSetAuto-42.zip Distance px	24	2306.3	0.878891	206.804	11.1521	206.804
AcR-05f_m67_003	AcR	AcR-05f_m67_003.xlsx_RoiSetAuto-43.zip Distance px	20	2137.1	0.372824	206.804	10.334	206.804
AcR-05f_m67_003	AcR	AcR-05f_m67_003.xlsx_RoiSetAuto-44.zip Distance px	36	2157.28	0.747744	206.804	10.4315	206.804
AcR-05f_m67_003	AcR	AcR-05f_m67_003.xlsx_RoiSetAuto-45.zip Distance px	16	2051.41	0.277581	206.804	9.91959	206.804
AcR-05f_m67_003	AcR	AcR-05f_m67_003.xlsx_RoiSetAuto-46.zip Distance px	16	1981.46	0.552294	206.804	9.58133	206.804
AcR-05f_m67_003	AcR	AcR-05f_m67_003.xlsx_RoiSetAuto-47.zip Distance px	40	2550.6	0.857722	206.804	12.3334	206.804
AcR-05f_m67_003	AcR	AcR-05f_m67_003.xlsx_RoiSetAuto-48.zip Distance px	20	1893.98	0.308767	206.804	9.15835	206.804
AcR-05f_m67_003	AcR	AcR-05f_m67_003.xlsx_RoiSetAuto-49.zip Distance px	16	2260.92	0.524822	206.804	10.9327	206.804
AcR-05f_m67_003	AcR	AcR-05f_m67_003.xlsx_RoiSetAuto-5.zip Distance px	16	2381.62	0.241996	206.804	11.5163	206.804
AcR-05f_m67_003	AcR	AcR-05f_m67_003.xlsx_RoiSetAuto-50.zip Distance px	20	1795.89	0.470326	206.804	8.68404	206.804
AcR-05f_m67_003	AcR	AcR-05f_m67_003.xlsx_RoiSetAuto-51.zip Distance px	20	2448.95	0.892912	206.804	11.8419	206.804
AcR-05f_m67_003	AcR	AcR-05f_m67_003.xlsx_RoiSetAuto-52.zip Distance px	44	2293.65	0.470329	206.804	11.0909	206.804
AcR-05f_m67_003	AcR	AcR-05f_m67_003.xlsx_RoiSetAuto-53.zip Distance px	16	2134.53	0.53736	206.804	10.3215	206.804
AcR-05f_m67_003	AcR	AcR-05f_m67_003.xlsx_RoiSetAuto-54.zip Distance px	44	2468.82	1.06041	206.804	11.938	206.804
AcR-05f_m67_003	AcR	AcR-05f_m67_003.xlsx_RoiSetAuto-55.zip Distance px	24	1946.26	0.681031	206.804	9.41116	206.804
AcR-05f_m67_003	AcR	AcR-05f_m67_003.xlsx_RoiSetAuto-56.zip Distance px	32	2434.93	0.679726	206.804	11.7741	206.804
AcR-05f_m67_003	AcR	AcR-05f_m67_003.xlsx_RoiSetAuto-57.zip Distance px	52	2617.96	1.02776	206.804	12.6592	206.804
AcR-05f_m67_003	AcR	AcR-05f_m67_003.xlsx_RoiSetAuto-58.zip Distance px	16	2694.79	0.745698	206.804	13.0306	206.804
AcR-05f_m67_003	AcR	AcR-05f_m67_003.xlsx_RoiSetAuto-59.zip Distance px	24	1762.2	0.677137	206.804	8.52111	206.804
AcR-05f_m67_003	AcR	AcR-05f_m67_003.xlsx_RoiSetAuto-6.zip Distance px	260	5710.96	0.786373	206.804	27.6154	206.804
AcR-05f_m67_003	AcR	AcR-05f_m67_003.xlsx_RoiSetAuto-60.zip Distance px	16	1966.12	0.498489	206.804	9.50715	206.804
AcR-05f_m67_003	AcR	AcR-05f_m67_003.xlsx_RoiSetAuto-61.zip Distance px	16	2449.61	0.963675	206.804	11.8451	206.804
AcR-05f_m67_003	AcR	AcR-05f_m67_003.xlsx_RoiSetAuto-62.zip Distance px	24	2130.04	0.377754	206.804	10.2998	206.804
AcR-05f_m67_003	AcR	AcR-05f_m67_003.xlsx_RoiSetAuto-63.zip Distance px	16	2593.17	0.636957	206.804	12.5393	206.804
AcR-05f_m67_003	AcR	AcR-05f_m67_003.xlsx_RoiSetAuto-64.zip Distance px	16	1983.18	0.243416	206.804	9.58965	206.804
AcR-05f_m67_003	AcR	AcR-05f_m67_003.xlsx_RoiSetAuto-8.zip Distance px	216	6940.56	1.71335	206.804	33.5611	206.804
AcR-05f_m67_003	AcR	AcR-05f_m67_003.xlsx_RoiSetAuto-9.zip Distance px	20	2252.47	0.60688	206.804	10.8918	206.804
FTT-01x_m67_001	FTT	FTT-01x_m67_001.xlsx_RoiSetAuto-1.zip Distance px	36	7011.46	0.871779	577.614	12.1387	577.614
FTT-01x_m67_001	FTT	FTT-01x_m67_001.xlsx_RoiSetAuto-2.zip Distance px	16	5403.44	0.213345	577.614	9.35477	577.614
FTT-01x_m67_001	FTT	FTT-01x_m67_001.xlsx_RoiSetAuto-3.zip Distance px	24	4911.16	0.418747	577.614	8.50249	577.614
FTT-01x_m67_001	FTT	FTT-01x_m67_001.xlsx_RoiSetAuto-4.zip Distance px	16	3700.64	0.273301	577.614	6.40676	577.614
FTT-01x_m67_001	FTT	FTT-01x_m67_001.xlsx_RoiSetAuto-6.zip Distance px	84	8543.43	0.791372	577.614	14.7909	577.614
FTT-01x_m67_001	FTT	FTT-01x_m67_001.xlsx_RoiSetAuto-7.zip Distance px	44	7064.42	0.668424	577.614	12.2303	577.614
FTT-01x_m67_001	FTT	FTT-01x_m67_001.xlsx_RoiSetAuto-9.zip Distance px	28	9456.92	0.38785	577.614	16.3724	577.614
FTT-01x_m67_002	FTT	FTT-01x_m67_002.xlsx_RoiSetAuto-1.zip Distance px	20	8803.8	0.375947	611.023	14.4083	611.023
FTT-01x_m67_002	FTT	FTT-01x_m67_002.xlsx_RoiSetAuto-10.zip Distance px	28	6900.83	0.5363	611.023	11.2939	611.023
FTT-01x_m67_002	FTT	FTT-01x_m67_002.xlsx_RoiSetAuto-12.zip Distance px	20	6578.19	0.440226	611.023	10.7659	611.023
FTT-01x_m67_002	FTT	FTT-01x_m67_002.xlsx_RoiSetAuto-13.zip Distance px	24	6847.88	0.331612	611.023	11.2072	611.023
FTT-01x_m67_002	FTT	FTT-01x_m67_002.xlsx_RoiSetAuto-14.zip Distance px	108	9086.9	1.16777	611.023	14.8716	611.023
FTT-01x_m67_002	FTT	FTT-01x_m67_002.xlsx_RoiSetAuto-15.zip Distance px	16	5130.64	0.904891	611.023	8.3968	611.023
FTT-01x_m67_002	FTT	FTT-01x_m67_002.xlsx_RoiSetAuto-17.zip Distance px	20	6154.32	0.415877	611.023	10.0722	611.023
FTT-01x_m67_002	FTT	FTT-01x_m67_002.xlsx_RoiSetAuto-24.zip Distance px	120	12803.5	1.10774	611.023	20.9542	611.023
FTT-01x_m67_002	FTT	FTT-01x_m67_002.xlsx_RoiSetAuto-26.zip Distance px	16	6518.98	0.12107	611.023	10.669	611.023
FTT-01x_m67_002	FTT	FTT-01x_m67_002.xlsx_RoiSetAuto-27.zip Distance px	24	8493.74	0.82298	611.023	13.9009	611.023
FTT-01x_m67_002	FTT	FTT-01x_m67_002.xlsx_RoiSetAuto-28.zip Distance px	24	9897.7	0.41264	611.023	16.1986	611.023
FTT-01x_m67_002	FTT	FTT-01x_m67_002.xlsx_RoiSetAuto-32.zip Distance px	20	10887.4	0.449144	611.023	17.8183	611.023
FTT-01x_m67_002	FTT	FTT-01x_m67_002.xlsx_RoiSetAuto-34.zip Distance px	28	11700.1	0.543872	611.023	19.1484	611.023
FTT-01x_m67_002	FTT	FTT-01x_m67_002.xlsx_RoiSetAuto-35.zip Distance px	24	11769.8	0.24029	611.023	19.2625	611.023
FTT-01x_m67_002	FTT	FTT-01x_m67_002.xlsx_RoiSetAuto-36.zip Distance px	20	9600.41	0.664583	611.023	15.712	611.023
FTT-01x_m67_002	FTT	FTT-01x_m67_002.xlsx_RoiSetAuto-9.zip Distance px	20	5849.47	0.255691	611.023	9.57324	611.023
FTT-03x_m67_001	FTT	FTT-03x_m67_001.xlsx_RoiSetAuto-1.zip Distance px	44	9026.8	0.375688	778.334	11.5976	778.334
FTT-03x_m67_001	FTT	FTT-03x_m67_001.xlsx_RoiSetAuto-10.zip Distance px	16	7127.63	0.399818	778.334	9.15754	778.334
FTT-03x_m67_001	FTT	FTT-03x_m67_001.xlsx_RoiSetAuto-11.zip Distance px	56	10479.6	0.593223	778.334	13.4641	778.334
FTT-03x_m67_001	FTT	FTT-03x_m67_001.xlsx_RoiSetAuto-12.zip Distance px	16	6726.19	0.141007	778.334	8.64178	778.334
FTT-03x_m67_001	FTT	FTT-03x_m67_001.xlsx_RoiSetAuto-13.zip Distance px	64	10903.1	0.650015	778.334	14.0082	778.334
FTT-03x_m67_001	FTT	FTT-03x_m67_001.xlsx_RoiSetAuto-14.zip Distance px	56	9784.74	0.570027	778.334	12.5714	778.334
FTT-03x_m67_001	FTT	FTT-03x_m67_001.xlsx_RoiSetAuto-15.zip Distance px	124	9758.79	0.924543	778.334	12.5381	778.334
FTT-03x_m67_001	FTT	FTT-03x_m67_001.xlsx_RoiSetAuto-16.zip Distance px	16	7940.36	0.418293	778.334	10.2017	778.334
FTT-03x_m67_001	FTT	FTT-03x_m67_001.xlsx_RoiSetAuto-17.zip Distance px	60	8626.69	0.67583	778.334	11.0835	778.334
FTT-03x_m67_001	FTT	FTT-03x_m67_001.xlsx_RoiSetAuto-18.zip Distance px	24	7781.06	0.440166	778.334	9.99708	778.334
FTT-03x_m67_001	FTT	FTT-03x_m67_001.xlsx_RoiSetAuto-20.zip Distance px	48	9640.29	0.620444	778.334	12.3858	778.334
FTT-03x_m67_001	FTT	FTT-03x_m67_001.xlsx_RoiSetAuto-21.zip Distance px	20	8599.91	0.301136	778.334	11.0491	778.334
FTT-03x_m67_001	FTT	FTT-03x_m67_001.xlsx_RoiSetAuto-23.zip Distance px	40	9599.17	0.548914	778.334	12.333	778.334
FTT-03x_m67_001	FTT	FTT-03x_m67_001.xlsx_RoiSetAuto-24.zip Distance px	20	8246.14	0.415639	778.334	10.5946	778.334
FTT-03x_m67_001	FTT	FTT-03x_m67_001.xlsx_RoiSetAuto-25.zip Distance px	20	8594.61	0.411643	778.334	11.0423	778.334
FTT-03x_m67_001	FTT	FTT-03x_m67_001.xlsx_RoiSetAuto-26.zip Distance px	72	10725.1	0.722206	778.334	13.7796	778.334
FTT-03x_m67_001	FTT	FTT-03x_m67_001.xlsx_RoiSetAuto-27.zip Distance px	40	12129.3	0.531617	778.334	15.5837	778.334
FTT-03x_m67_001	FTT	FTT-03x_m67_001.xlsx_RoiSetAuto-28.zip Distance px	20	9639.7	0.422263	778.334	12.385	778.334
FTT-03x_m67_001	FTT	FTT-03x_m67_001.xlsx_RoiSetAuto-29.zip Distance px	28	10033.9	0.263822	778.334	12.8914	778.334
FTT-03x_m67_001	FTT	FTT-03x_m67_001.xlsx_RoiSetAuto-3.zip Distance px	84	9486.83	0.544162	778.334	12.1886	778.334
FTT-03x_m67_001	FTT	FTT-03x_m67_001.xlsx_RoiSetAuto-30.zip Distance px	52	13086.5	0.535852	778.334	16.8134	778.334
FTT-03x_m67_001	FTT	FTT-03x_m67_001.xlsx_RoiSetAuto-31.zip Distance px	48	12091.3	0.250061	778.334	15.5348	778.334
FTT-03x_m67_001	FTT	FTT-03x_m67_001.xlsx_RoiSetAuto-32.zip Distance px	24	10876.5	0.419806	778.334	13.974	778.334
FTT-03x_m67_001	FTT	FTT-03x_m67_001.xlsx_RoiSetAuto-4.zip Distance px	16	8002.62	0.230165	778.334	10.2817	778.334
FTT-03x_m67_001	FTT	FTT-03x_m67_001.xlsx_RoiSetAuto-5.zip Distance px	60	8936.59	0.838905	778.334	11.4817	778.334
FTT-03x_m67_001	FTT	FTT-03x_m67_001.xlsx_RoiSetAuto-6.zip Distance px	28	8607.83	0.576992	778.334	11.0593	778.334
FTT-03x_m67_001	FTT	FTT-03x_m67_001.xlsx_RoiSetAuto-7.zip Distance px	208	12913.6	1.17992	778.334	16.5914	778.334
FTT-03x_m67_001	FTT	FTT-03x_m67_001.xlsx_RoiSetAuto-9.zip Distance px	20	7877.77	0.49413	778.334	10.1213	778.334
FTT-04x_m67_001	FTT	FTT-04x_m67_001.xlsx_RoiSetAuto-1.zip Distance px	76	7510.08	1.08105	617.696	12.1582	617.696
FTT-04x_m67_001	FTT	FTT-04x_m67_001.xlsx_RoiSetAuto-10.zip Distance px	16	5665.19	0.167808	617.696	9.17149	617.696
FTT-04x_m67_001	FTT	FTT-04x_m67_001.xlsx_RoiSetAuto-11.zip Distance px	32	6126.51	0.895857	617.696	9.91833	617.696
FTT-04x_m67_001	FTT	FTT-04x_m67_001.xlsx_RoiSetAuto-12.zip Distance px	72	8855.95	0.912236	617.696	14.3371	617.696
FTT-04x_m67_001	FTT	FTT-04x_m67_001.xlsx_RoiSetAuto-13.zip Distance px	104	8674.5	0.673228	617.696	14.0433	617.696
FTT-04x_m67_001	FTT	FTT-04x_m67_001.xlsx_RoiSetAuto-14.zip Distance px	44	7408.71	0.814138	617.696	11.9941	617.696
FTT-04x_m67_001	FTT	FTT-04x_m67_001.xlsx_RoiSetAuto-15.zip Distance px	20	6803.36	0.191843	617.696	11.0141	617.696
FTT-04x_m67_001	FTT	FTT-04x_m67_001.xlsx_RoiSetAuto-16.zip Distance px	24	7177.93	0.29833	617.696	11.6205	617.696
FTT-04x_m67_001	FTT	FTT-04x_m67_001.xlsx_RoiSetAuto-17.zip Distance px	20	6149.77	0.278537	617.696	9.95599	617.696
FTT-04x_m67_001	FTT	FTT-04x_m67_001.xlsx_RoiSetAuto-18.zip Distance px	24	7464.96	0.944316	617.696	12.0852	617.696
FTT-04x_m67_001	FTT	FTT-04x_m67_001.xlsx_RoiSetAuto-19.zip Distance px	32	10180.7	0.649125	617.696	16.4817	617.696
FTT-04x_m67_001	FTT	FTT-04x_m67_001.xlsx_RoiSetAuto-2.zip Distance px	360	9603.02	0.751182	617.696	15.5465	617.696
FTT-04x_m67_001	FTT	FTT-04x_m67_001.xlsx_RoiSetAuto-20.zip Distance px	16	7298.27	0.441527	617.696	11.8153	617.696
FTT-04x_m67_001	FTT	FTT-04x_m67_001.xlsx_RoiSetAuto-21.zip Distance px	24	7383.08	0.389759	617.696	11.9526	617.696
FTT-04x_m67_001	FTT	FTT-04x_m67_001.xlsx_RoiSetAuto-22.zip Distance px	16	8804.69	0.0793106	617.696	14.2541	617.696
FTT-04x_m67_001	FTT	FTT-04x_m67_001.xlsx_RoiSetAuto-3.zip Distance px	16	6058.73	0.513999	617.696	9.80859	617.696
FTT-04x_m67_001	FTT	FTT-04x_m67_001.xlsx_RoiSetAuto-4.zip Distance px	20	5729.41	0.560083	617.696	9.27546	617.696
FTT-04x_m67_001	FTT	FTT-04x_m67_001.xlsx_RoiSetAuto-5.zip Distance px	16	5422.04	0.500355	617.696	8.77784	617.696
FTT-04x_m67_001	FTT	FTT-04x_m67_001.xlsx_RoiSetAuto-6.zip Distance px	32	6488.91	0.380675	617.696	10.505	617.696
FTT-04x_m67_001	FTT	FTT-04x_m67_001.xlsx_RoiSetAuto-8.zip Distance px	16	6879.78	0.267636	617.696	11.1378	617.696
FTT-04x_m67_001	FTT	FTT-04x_m67_001.xlsx_RoiSetAuto-9.zip Distance px	20	6539.58	0.576191	617.696	10.5871	617.696
FTT-04x_m67_002	FTT	FTT-04x_m67_002.xlsx_RoiSetAuto-10.zip Distance px	56	10696.1	0.794146	706.879	15.1315	706.879
FTT-04x_m67_002	FTT	FTT-04x_m67_002.xlsx_RoiSetAuto-12.zip Distance px	48	7280.96	0.558328	706.879	10.3001	706.879
FTT-04x_m67_002	FTT	FTT-04x_m67_002.xlsx_RoiSetAuto-13.zip Distance px	36	8309.54	0.818112	706.879	11.7552	706.879
FTT-04x_m67_002	FTT	FTT-04x_m67_002.xlsx_RoiSetAuto-14.zip Distance px	52	7340.57	0.659765	706.879	10.3845	706.879
FTT-04x_m67_002	FTT	FTT-04x_m67_002.xlsx_RoiSetAuto-15.zip Distance px	28	10326	0.610708	706.879	14.6078	706.879
FTT-04x_m67_002	FTT	FTT-04x_m67_002.xlsx_RoiSetAuto-16.zip Distance px	20	6190.55	0.416809	706.879	8.75758	706.879
FTT-04x_m67_002	FTT	FTT-04x_m67_002.xlsx_RoiSetAuto-19.zip Distance px	32	7002.67	0.539756	706.879	9.90647	706.879
FTT-04x_m67_002	FTT	FTT-04x_m67_002.xlsx_RoiSetAuto-2.zip Distance px	92	7824.96	0.631772	706.879	11.0697	706.879
FTT-04x_m67_002	FTT	FTT-04x_m67_002.xlsx_RoiSetAuto-20.zip Distance px	24	10217.6	0.32759	706.879	14.4545	706.879
FTT-04x_m67_002	FTT	FTT-04x_m67_002.xlsx_RoiSetAuto-21.zip Distance px	44	8462.81	0.527476	706.879	11.9721	706.879
FTT-04x_m67_002	FTT	FTT-04x_m67_002.xlsx_RoiSetAuto-22.zip Distance px	32	7568.84	0.591063	706.879	10.7074	706.879
FTT-04x_m67_002	FTT	FTT-04x_m67_002.xlsx_RoiSetAuto-23.zip Distance px	28	8328.99	0.422456	706.879	11.7828	706.879
FTT-04x_m67_002	FTT	FTT-04x_m67_002.xlsx_RoiSetAuto-24.zip Distance px	36	8878.25	0.605951	706.879	12.5598	706.879
FTT-04x_m67_002	FTT	FTT-04x_m67_002.xlsx_RoiSetAuto-26.zip Distance px	32	8299.24	0.492405	706.879	11.7407	706.879
FTT-04x_m67_002	FTT	FTT-04x_m67_002.xlsx_RoiSetAuto-27.zip Distance px	28	7420.62	0.503816	706.879	10.4977	706.879
FTT-04x_m67_002	FTT	FTT-04x_m67_002.xlsx_RoiSetAuto-29.zip Distance px	16	7090.86	0.313652	706.879	10.0312	706.879
FTT-04x_m67_002	FTT	FTT-04x_m67_002.xlsx_RoiSetAuto-3.zip Distance px	48	7437.02	0.602469	706.879	10.5209	706.879
FTT-04x_m67_002	FTT	FTT-04x_m67_002.xlsx_RoiSetAuto-30.zip Distance px	16	8242.57	0.141692	706.879	11.6605	706.879
FTT-04x_m67_002	FTT	FTT-04x_m67_002.xlsx_RoiSetAuto-31.zip Distance px	24	7472.08	0.393127	706.879	10.5705	706.879
FTT-04x_m67_002	FTT	FTT-04x_m67_002.xlsx_RoiSetAuto-32.zip Distance px	28	10838.1	0.699572	706.879	15.3323	706.879
FTT-04x_m67_002	FTT	FTT-04x_m67_002.xlsx_RoiSetAuto-34.zip Distance px	20	8600.96	0.26781	706.879	12.1675	706.879
FTT-04x_m67_002	FTT	FTT-04x_m67_002.xlsx_RoiSetAuto-36.zip Distance px	16	9612.86	0.433759	706.879	13.599	706.879
FTT-04x_m67_002	FTT	FTT-04x_m67_002.xlsx_RoiSetAuto-37.zip Distance px	16	9652.43	0.365697	706.879	13.655	706.879
FTT-04x_m67_002	FTT	FTT-04x_m67_002.xlsx_RoiSetAuto-38.zip Distance px	16	8091.52	0.362888	706.879	11.4468	706.879
FTT-04x_m67_002	FTT	FTT-04x_m67_002.xlsx_RoiSetAuto-39.zip Distance px	44	11081	0.441457	706.879	15.6759	706.879
FTT-04x_m67_002	FTT	FTT-04x_m67_002.xlsx_RoiSetAuto-4.zip Distance px	56	7396.99	0.514617	706.879	10.4643	706.879
FTT-04x_m67_002	FTT	FTT-04x_m67_002.xlsx_RoiSetAuto-8.zip Distance px	68	8916.16	0.653475	706.879	12.6134	706.879
FTT-04x_m67_002	FTT	FTT-04x_m67_002.xlsx_RoiSetAuto-9.zip Distance px	44	7355.91	0.666359	706.879	10.4062	706.879
FTT-05x_m67_002	FTT	FTT-05x_m67_002.xlsx_RoiSetAuto-10.zip Distance px	28	10672.6	0.30511	712.968	14.9692	712.968
FTT-05x_m67_002	FTT	FTT-05x_m67_002.xlsx_RoiSetAuto-11.zip Distance px	20	8762.91	0.585515	712.968	12.2907	712.968
FTT-05x_m67_002	FTT	FTT-05x_m67_002.xlsx_RoiSetAuto-13.zip Distance px	32	8627.65	0.539867	712.968	12.101	712.968
FTT-05x_m67_002	FTT	FTT-05x_m67_002.xlsx_RoiSetAuto-14.zip Distance px	32	12314	0.895678	712.968	17.2715	712.968
FTT-05x_m67_002	FTT	FTT-05x_m67_002.xlsx_RoiSetAuto-15.zip Distance px	44	9329.95	0.543826	712.968	13.0861	712.968
FTT-05x_m67_002	FTT	FTT-05x_m67_002.xlsx_RoiSetAuto-16.zip Distance px	32	7766.57	0.272173	712.968	10.8933	712.968
FTT-05x_m67_002	FTT	FTT-05x_m67_002.xlsx_RoiSetAuto-18.zip Distance px	16	5947.26	0.944919	712.968	8.34156	712.968
FTT-05x_m67_002	FTT	FTT-05x_m67_002.xlsx_RoiSetAuto-19.zip Distance px	20	9466.04	0.672764	712.968	13.2769	712.968
FTT-05x_m67_002	FTT	FTT-05x_m67_002.xlsx_RoiSetAuto-20.zip Distance px	60	10442.7	0.61259	712.968	14.6468	712.968
FTT-05x_m67_002	FTT	FTT-05x_m67_002.xlsx_RoiSetAuto-21.zip Distance px	28	6895.66	0.579305	712.968	9.67177	712.968
FTT-05x_m67_002	FTT	FTT-05x_m67_002.xlsx_RoiSetAuto-23.zip Distance px	16	7341.86	0.589331	712.968	10.2976	712.968
FTT-05x_m67_002	FTT	FTT-05x_m67_002.xlsx_RoiSetAuto-24.zip Distance px	48	11957.4	0.630781	712.968	16.7713	712.968
FTT-05x_m67_002	FTT	FTT-05x_m67_002.xlsx_RoiSetAuto-26.zip Distance px	72	14883.9	1.1571	712.968	20.876	712.968
FTT-05x_m67_002	FTT	FTT-05x_m67_002.xlsx_RoiSetAuto-27.zip Distance px	48	11819.3	0.794983	712.968	16.5777	712.968
FTT-05x_m67_002	FTT	FTT-05x_m67_002.xlsx_RoiSetAuto-30.zip Distance px	40	9725.89	0.665437	712.968	13.6414	712.968
FTT-05x_m67_002	FTT	FTT-05x_m67_002.xlsx_RoiSetAuto-32.zip Distance px	20	6949.3	0.353461	712.968	9.747	712.968
FTT-05x_m67_002	FTT	FTT-05x_m67_002.xlsx_RoiSetAuto-4.zip Distance px	40	12266.1	0.670703	712.968	17.2043	712.968
FTT-05x_m67_002	FTT	FTT-05x_m67_002.xlsx_RoiSetAuto-8.zip Distance px	24	9721.75	0.589747	712.968	13.6356	712.968
FTT-05x_m67_002	FTT	FTT-05x_m67_002.xlsx_RoiSetAuto-9.zip Distance px	44	7264.81	0.808318	712.968	10.1895	712.968
FTT-06x_m67_001	FTT	FTT-06x_m67_001.xlsx_RoiSetAuto-1.zip Distance px	20	5144.77	0.274563	607.72	8.46569	607.72
FTT-06x_m67_001	FTT	FTT-06x_m67_001.xlsx_RoiSetAuto-10.zip Distance px	44	8890.49	0.735579	607.72	14.6293	607.72
FTT-06x_m67_001	FTT	FTT-06x_m67_001.xlsx_RoiSetAuto-15.zip Distance px	52	7084.66	0.510982	607.72	11.6578	607.72
FTT-06x_m67_001	FTT	FTT-06x_m67_001.xlsx_RoiSetAuto-17.zip Distance px	36	5550.3	0.499581	607.72	9.13299	607.72
FTT-06x_m67_001	FTT	FTT-06x_m67_001.xlsx_RoiSetAuto-19.zip Distance px	32	7562.91	0.79331	607.72	12.4447	607.72
FTT-06x_m67_001	FTT	FTT-06x_m67_001.xlsx_RoiSetAuto-2.zip Distance px	96	9645.83	1.09082	607.72	15.8722	607.72
FTT-06x_m67_001	FTT	FTT-06x_m67_001.xlsx_RoiSetAuto-20.zip Distance px	56	8628.16	0.671131	607.72	14.1976	607.72
FTT-06x_m67_001	FTT	FTT-06x_m67_001.xlsx_RoiSetAuto-21.zip Distance px	52	6683.78	0.841799	607.72	10.9981	607.72
FTT-06x_m67_001	FTT	FTT-06x_m67_001.xlsx_RoiSetAuto-22.zip Distance px	20	7118.39	0.668349	607.72	11.7133	607.72
FTT-06x_m67_001	FTT	FTT-06x_m67_001.xlsx_RoiSetAuto-23.zip Distance px	72	10349.2	0.772216	607.72	17.0296	607.72
FTT-06x_m67_001	FTT	FTT-06x_m67_001.xlsx_RoiSetAuto-24.zip Distance px	36	5862.44	0.664139	607.72	9.64662	607.72
FTT-06x_m67_001	FTT	FTT-06x_m67_001.xlsx_RoiSetAuto-25.zip Distance px	40	7738.63	0.497411	607.72	12.7339	607.72
FTT-06x_m67_001	FTT	FTT-06x_m67_001.xlsx_RoiSetAuto-26.zip Distance px	32	5408.88	0.738358	607.72	8.90029	607.72
FTT-06x_m67_001	FTT	FTT-06x_m67_001.xlsx_RoiSetAuto-27.zip Distance px	20	7765.18	0.285524	607.72	12.7776	607.72
FTT-06x_m67_001	FTT	FTT-06x_m67_001.xlsx_RoiSetAuto-28.zip Distance px	68	8905.52	0.422495	607.72	14.654	607.72
FTT-06x_m67_001	FTT	FTT-06x_m67_001.xlsx_RoiSetAuto-29.zip Distance px	52	7111.14	0.530793	607.72	11.7013	607.72
FTT-06x_m67_001	FTT	FTT-06x_m67_001.xlsx_RoiSetAuto-3.zip Distance px	44	6959.36	0.346731	607.72	11.4516	607.72
FTT-06x_m67_001	FTT	FTT-06x_m67_001.xlsx_RoiSetAuto-30.zip Distance px	20	5636.63	0.445567	607.72	9.27505	607.72
FTT-06x_m67_001	FTT	FTT-06x_m67_001.xlsx_RoiSetAuto-32.zip Distance px	20	6660.78	0.166053	607.72	10.9603	607.72
FTT-06x_m67_001	FTT	FTT-06x_m67_001.xlsx_RoiSetAuto-34.zip Distance px	96	8940.12	0.848762	607.72	14.7109	607.72
FTT-06x_m67_001	FTT	FTT-06x_m67_001.xlsx_RoiSetAuto-36.zip Distance px	148	9826.29	0.949991	607.72	16.1691	607.72
FTT-06x_m67_001	FTT	FTT-06x_m67_001.xlsx_RoiSetAuto-37.zip Distance px	16	6767.82	0.352516	607.72	11.1364	607.72
FTT-06x_m67_001	FTT	FTT-06x_m67_001.xlsx_RoiSetAuto-38.zip Distance px	20	6625.41	0.204624	607.72	10.9021	607.72
FTT-06x_m67_001	FTT	FTT-06x_m67_001.xlsx_RoiSetAuto-39.zip Distance px	40	7604.53	0.532785	607.72	12.5132	607.72
FTT-06x_m67_001	FTT	FTT-06x_m67_001.xlsx_RoiSetAuto-42.zip Distance px	24	8272.59	0.595231	607.72	13.6125	607.72
FTT-06x_m67_001	FTT	FTT-06x_m67_001.xlsx_RoiSetAuto-43.zip Distance px	76	9095.2	0.681202	607.72	14.9661	607.72
FTT-06x_m67_001	FTT	FTT-06x_m67_001.xlsx_RoiSetAuto-44.zip Distance px	48	7571.66	0.3553	607.72	12.4591	607.72
FTT-06x_m67_001	FTT	FTT-06x_m67_001.xlsx_RoiSetAuto-45.zip Distance px	72	9560.03	0.514522	607.72	15.731	607.72
FTT-06x_m67_001	FTT	FTT-06x_m67_001.xlsx_RoiSetAuto-46.zip Distance px	40	8651.54	0.417503	607.72	14.2361	607.72
FTT-06x_m67_001	FTT	FTT-06x_m67_001.xlsx_RoiSetAuto-47.zip Distance px	28	13359.9	0.683167	607.72	21.9836	607.72
FTT-06x_m67_001	FTT	FTT-06x_m67_001.xlsx_RoiSetAuto-48.zip Distance px	16	8361.24	0.369475	607.72	13.7584	607.72
FTT-06x_m67_001	FTT	FTT-06x_m67_001.xlsx_RoiSetAuto-5.zip Distance px	64	7871.65	0.635299	607.72	12.9528	607.72
FTT-06x_m67_001	FTT	FTT-06x_m67_001.xlsx_RoiSetAuto-7.zip Distance px	28	7070.32	0.460456	607.72	11.6342	607.72
FTT-06x_m67_001	FTT	FTT-06x_m67_001.xlsx_RoiSetAuto-8.zip Distance px	84	10708.7	1.09271	607.72	17.6212	607.72
FTT-06x_m67_001	FTT	FTT-06x_m67_001.xlsx_RoiSetAuto-9.zip Distance px	48	6916.59	0.605708	607.72	11.3812	607.72
FTT-06x_m67_002	FTT	FTT-06x_m67_002.xlsx_RoiSetAuto-10.zip Distance px	16	3744.12	0.473809	434.977	8.60763	434.977
FTT-06x_m67_002	FTT	FTT-06x_m67_002.xlsx_RoiSetAuto-13.zip Distance px	68	6776.82	1.03041	434.977	15.5797	434.977
FTT-06x_m67_002	FTT	FTT-06x_m67_002.xlsx_RoiSetAuto-14.zip Distance px	84	6774.31	0.758583	434.977	15.574	434.977
FTT-06x_m67_002	FTT	FTT-06x_m67_002.xlsx_RoiSetAuto-16.zip Distance px	84	6414.37	1.06398	434.977	14.7465	434.977
FTT-06x_m67_002	FTT	FTT-06x_m67_002.xlsx_RoiSetAuto-17.zip Distance px	24	4501.44	0.660727	434.977	10.3487	434.977
FTT-06x_m67_002	FTT	FTT-06x_m67_002.xlsx_RoiSetAuto-18.zip Distance px	72	8534.97	1.29822	434.977	19.6217	434.977
FTT-06x_m67_002	FTT	FTT-06x_m67_002.xlsx_RoiSetAuto-19.zip Distance px	24	3512.88	0.489608	434.977	8.07601	434.977
FTT-06x_m67_002	FTT	FTT-06x_m67_002.xlsx_RoiSetAuto-20.zip Distance px	28	5112.05	0.635718	434.977	11.7525	434.977
FTT-06x_m67_002	FTT	FTT-06x_m67_002.xlsx_RoiSetAuto-21.zip Distance px	24	7204.27	0.690211	434.977	16.5624	434.977
FTT-06x_m67_002	FTT	FTT-06x_m67_002.xlsx_RoiSetAuto-22.zip Distance px	20	4636.64	0.810307	434.977	10.6595	434.977
FTT-06x_m67_002	FTT	FTT-06x_m67_002.xlsx_RoiSetAuto-23.zip Distance px	20	4727.43	0.279737	434.977	10.8682	434.977
FTT-06x_m67_002	FTT	FTT-06x_m67_002.xlsx_RoiSetAuto-25.zip Distance px	32	4478.23	0.592035	434.977	10.2953	434.977
FTT-06x_m67_002	FTT	FTT-06x_m67_002.xlsx_RoiSetAuto-26.zip Distance px	32	6195.37	0.771756	434.977	14.243	434.977
FTT-06x_m67_002	FTT	FTT-06x_m67_002.xlsx_RoiSetAuto-27.zip Distance px	60	4710.59	0.531153	434.977	10.8295	434.977
FTT-06x_m67_002	FTT	FTT-06x_m67_002.xlsx_RoiSetAuto-28.zip Distance px	20	4713.34	0.689014	434.977	10.8358	434.977
FTT-06x_m67_002	FTT	FTT-06x_m67_002.xlsx_RoiSetAuto-29.zip Distance px	36	4531.44	0.218745	434.977	10.4176	434.977
FTT-06x_m67_002	FTT	FTT-06x_m67_002.xlsx_RoiSetAuto-30.zip Distance px	128	6259.3	0.891589	434.977	14.39	434.977
FTT-06x_m67_002	FTT	FTT-06x_m67_002.xlsx_RoiSetAuto-31.zip Distance px	28	5322.05	0.797559	434.977	12.2352	434.977
FTT-06x_m67_002	FTT	FTT-06x_m67_002.xlsx_RoiSetAuto-33.zip Distance px	16	5299.14	0.611375	434.977	12.1826	434.977
FTT-06x_m67_002	FTT	FTT-06x_m67_002.xlsx_RoiSetAuto-34.zip Distance px	16	4602.19	0.514207	434.977	10.5803	434.977
FTT-06x_m67_002	FTT	FTT-06x_m67_002.xlsx_RoiSetAuto-35.zip Distance px	88	6054.38	0.723795	434.977	13.9189	434.977
FTT-06x_m67_002	FTT	FTT-06x_m67_002.xlsx_RoiSetAuto-37.zip Distance px	32	5137.86	0.744953	434.977	11.8118	434.977
FTT-06x_m67_002	FTT	FTT-06x_m67_002.xlsx_RoiSetAuto-38.zip Distance px	64	6613.16	1.02495	434.977	15.2035	434.977
FTT-06x_m67_002	FTT	FTT-06x_m67_002.xlsx_RoiSetAuto-39.zip Distance px	36	6166.63	0.735652	434.977	14.1769	434.977
FTT-06x_m67_002	FTT	FTT-06x_m67_002.xlsx_RoiSetAuto-4.zip Distance px	60	6983.4	0.770428	434.977	16.0547	434.977
FTT-06x_m67_002	FTT	FTT-06x_m67_002.xlsx_RoiSetAuto-41.zip Distance px	36	5365.42	0.445926	434.977	12.3349	434.977
FTT-06x_m67_002	FTT	FTT-06x_m67_002.xlsx_RoiSetAuto-45.zip Distance px	16	5177.02	0.166566	434.977	11.9018	434.977
FTT-06x_m67_002	FTT	FTT-06x_m67_002.xlsx_RoiSetAuto-46.zip Distance px	76	8969.92	1.10295	434.977	20.6216	434.977
FTT-06x_m67_002	FTT	FTT-06x_m67_002.xlsx_RoiSetAuto-47.zip Distance px	56	5451.34	0.663106	434.977	12.5325	434.977
FTT-06x_m67_002	FTT	FTT-06x_m67_002.xlsx_RoiSetAuto-48.zip Distance px	24	4935.98	0.562143	434.977	11.3477	434.977
FTT-06x_m67_002	FTT	FTT-06x_m67_002.xlsx_RoiSetAuto-5.zip Distance px	28	5335.4	0.547187	434.977	12.2659	434.977
FTT-06x_m67_002	FTT	FTT-06x_m67_002.xlsx_RoiSetAuto-50.zip Distance px	32	5404.27	0.44633	434.977	12.4243	434.977
FTT-06x_m67_002	FTT	FTT-06x_m67_002.xlsx_RoiSetAuto-52.zip Distance px	20	5692.78	0.709054	434.977	13.0875	434.977
FTT-06x_m67_002	FTT	FTT-06x_m67_002.xlsx_RoiSetAuto-54.zip Distance px	28	5647.56	0.680577	434.977	12.9836	434.977
FTT-06x_m67_002	FTT	FTT-06x_m67_002.xlsx_RoiSetAuto-55.zip Distance px	24	6531.72	0.694857	434.977	15.0163	434.977
FTT-06x_m67_002	FTT	FTT-06x_m67_002.xlsx_RoiSetAuto-56.zip Distance px	40	5225.06	0.84179	434.977	12.0123	434.977
FTT-06x_m67_002	FTT	FTT-06x_m67_002.xlsx_RoiSetAuto-57.zip Distance px	28	4924.73	0.69706	434.977	11.3218	434.977
FTT-06x_m67_002	FTT	FTT-06x_m67_002.xlsx_RoiSetAuto-58.zip Distance px	40	4956.77	0.458312	434.977	11.3955	434.977
FTT-06x_m67_002	FTT	FTT-06x_m67_002.xlsx_RoiSetAuto-59.zip Distance px	16	6107.98	0.126045	434.977	14.0421	434.977
FTT-06x_m67_002	FTT	FTT-06x_m67_002.xlsx_RoiSetAuto-6.zip Distance px	16	7283.46	0.487151	434.977	16.7445	434.977
FTT-06x_m67_002	FTT	FTT-06x_m67_002.xlsx_RoiSetAuto-60.zip Distance px	48	7284.09	0.697753	434.977	16.7459	434.977
FTT-06x_m67_002	FTT	FTT-06x_m67_002.xlsx_RoiSetAuto-61.zip Distance px	24	4624.71	0.319774	434.977	10.6321	434.977
FTT-06x_m67_002	FTT	FTT-06x_m67_002.xlsx_RoiSetAuto-62.zip Distance px	24	5413.16	0.678055	434.977	12.4447	434.977
FTT-06x_m67_002	FTT	FTT-06x_m67_002.xlsx_RoiSetAuto-63.zip Distance px	52	7122.97	0.697966	434.977	16.3755	434.977
FTT-06x_m67_002	FTT	FTT-06x_m67_002.xlsx_RoiSetAuto-64.zip Distance px	32	4780	0.241563	434.977	10.9891	434.977
FTT-06x_m67_002	FTT	FTT-06x_m67_002.xlsx_RoiSetAuto-65.zip Distance px	16	5632.69	0.151043	434.977	12.9494	434.977
FTT-06x_m67_002	FTT	FTT-06x_m67_002.xlsx_RoiSetAuto-66.zip Distance px	32	8256.74	0.885194	434.977	18.982	434.977
FTT-06x_m67_002	FTT	FTT-06x_m67_002.xlsx_RoiSetAuto-67.zip Distance px	24	5599.2	0.638642	434.977	12.8724	434.977
FTT-06x_m67_002	FTT	FTT-06x_m67_002.xlsx_RoiSetAuto-68.zip Distance px	24	4817.94	0.217992	434.977	11.0763	434.977
FTT-06x_m67_002	FTT	FTT-06x_m67_002.xlsx_RoiSetAuto-69.zip Distance px	16	4719.44	0.725464	434.977	10.8499	434.977
FTT-06x_m67_002	FTT	FTT-06x_m67_002.xlsx_RoiSetAuto-72.zip Distance px	16	4690.94	0.316981	434.977	10.7843	434.977
FTT-06x_m67_002	FTT	FTT-06x_m67_002.xlsx_RoiSetAuto-73.zip Distance px	40	6259.2	0.560131	434.977	14.3897	434.977
FTT-06x_m67_002	FTT	FTT-06x_m67_002.xlsx_RoiSetAuto-74.zip Distance px	32	9295.54	0.368124	434.977	21.3702	434.977
FTT-06x_m67_002	FTT	FTT-06x_m67_002.xlsx_RoiSetAuto-75.zip Distance px	16	4043.79	0.68616	434.977	9.29657	434.977
FTT-06x_m67_002	FTT	FTT-06x_m67_002.xlsx_RoiSetAuto-78.zip Distance px	16	8295.41	0.293447	434.977	19.0709	434.977
FTT-06x_m67_002	FTT	FTT-06x_m67_002.xlsx_RoiSetAuto-79.zip Distance px	16	6947.04	0.576749	434.977	15.971	434.977
FTT-06x_m67_002	FTT	FTT-06x_m67_002.xlsx_RoiSetAuto-8.zip Distance px	24	4929.6	0.587955	434.977	11.333	434.977
FTT-06x_m67_002	FTT	FTT-06x_m67_002.xlsx_RoiSetAuto-80.zip Distance px	16	5073.27	0.418128	434.977	11.6633	434.977
FTT-06x_m67_002	FTT	FTT-06x_m67_002.xlsx_RoiSetAuto-9.zip Distance px	32	6135	1.11395	434.977	14.1042	434.977
FTT-07f_m67_001	FTT	FTT-07f_m67_001.xlsx_RoiSetAuto-1.zip Distance px	16	3425.39	0.254161	418.187	8.19106	418.187
FTT-07f_m67_001	FTT	FTT-07f_m67_001.xlsx_RoiSetAuto-2.zip Distance px	16	4410.4	0.659424	418.187	10.5465	418.187
FTT-07f_m67_001	FTT	FTT-07f_m67_001.xlsx_RoiSetAuto-4.zip Distance px	16	4752.37	0.439326	418.187	11.3642	418.187
FTT-07f_m67_001	FTT	FTT-07f_m67_001.xlsx_RoiSetAuto-5.zip Distance px	52	4053.03	0.604662	418.187	9.6919	418.187
FTT-07f_m67_001	FTT	FTT-07f_m67_001.xlsx_RoiSetAuto-6.zip Distance px	28	5032.32	0.285051	418.187	12.0337	418.187
FTT-07f_m67_001	FTT	FTT-07f_m67_001.xlsx_RoiSetAuto-7.zip Distance px	56	5167.2	0.791112	418.187	12.3562	418.187
FTT-07f_m67_002	FTT	FTT-07f_m67_002.xlsx_RoiSetAuto-10.zip Distance px	20	3937.43	0.494069	432.951	9.0944	432.951
FTT-07f_m67_002	FTT	FTT-07f_m67_002.xlsx_RoiSetAuto-11.zip Distance px	104	6869.07	0.934452	432.951	15.8657	432.951
FTT-07f_m67_002	FTT	FTT-07f_m67_002.xlsx_RoiSetAuto-12.zip Distance px	24	5110.85	0.362022	432.951	11.8047	432.951
FTT-07f_m67_002	FTT	FTT-07f_m67_002.xlsx_RoiSetAuto-14.zip Distance px	16	4212.6	0.570245	432.951	9.72996	432.951
FTT-07f_m67_002	FTT	FTT-07f_m67_002.xlsx_RoiSetAuto-15.zip Distance px	32	5326.42	0.407263	432.951	12.3026	432.951
FTT-07f_m67_002	FTT	FTT-07f_m67_002.xlsx_RoiSetAuto-16.zip Distance px	36	4612.1	1.52725	432.951	10.6527	432.951
FTT-07f_m67_002	FTT	FTT-07f_m67_002.xlsx_RoiSetAuto-19.zip Distance px	16	4263.09	0.345112	432.951	9.84657	432.951
FTT-07f_m67_002	FTT	FTT-07f_m67_002.xlsx_RoiSetAuto-20.zip Distance px	84	7581.91	0.796889	432.951	17.5122	432.951
FTT-07f_m67_002	FTT	FTT-07f_m67_002.xlsx_RoiSetAuto-21.zip Distance px	16	5229.76	0.33796	432.951	12.0793	432.951
FTT-07f_m67_002	FTT	FTT-07f_m67_002.xlsx_RoiSetAuto-22.zip Distance px	52	8984.96	1.36778	432.951	20.7528	432.951
FTT-07f_m67_002	FTT	FTT-07f_m67_002.xlsx_RoiSetAuto-23.zip Distance px	68	8237.78	0.960455	432.951	19.027	432.951
FTT-07f_m67_002	FTT	FTT-07f_m67_002.xlsx_RoiSetAuto-24.zip Distance px	24	5851.53	0.540536	432.951	13.5154	432.951
FTT-07f_m67_002	FTT	FTT-07f_m67_002.xlsx_RoiSetAuto-28.zip Distance px	16	5923.73	0.293031	432.951	13.6822	432.951
FTT-07f_m67_002	FTT	FTT-07f_m67_002.xlsx_RoiSetAuto-4.zip Distance px	32	7586.15	0.913909	432.951	17.5219	432.951
FTT-07f_m67_002	FTT	FTT-07f_m67_002.xlsx_RoiSetAuto-5.zip Distance px	76	9076.46	1.15256	432.951	20.9642	432.951
FTT-07f_m67_002	FTT	FTT-07f_m67_002.xlsx_RoiSetAuto-6.zip Distance px	16	1994.23	0.352614	432.951	4.60612	432.951
FTT-07f_m67_002	FTT	FTT-07f_m67_002.xlsx_RoiSetAuto-8.zip Distance px	16	5503.93	0.41029	432.951	12.7126	432.951
FTT-07f_m67_003	FTT	FTT-07f_m67_003.xlsx_RoiSetAuto-1.zip Distance px	68	7302.57	0.641009	562.261	12.9879	562.261
FTT-07f_m67_003	FTT	FTT-07f_m67_003.xlsx_RoiSetAuto-10.zip Distance px	64	8437.72	1.03678	562.261	15.0068	562.261
FTT-07f_m67_003	FTT	FTT-07f_m67_003.xlsx_RoiSetAuto-11.zip Distance px	20	7028.36	0.631087	562.261	12.5002	562.261
FTT-07f_m67_003	FTT	FTT-07f_m67_003.xlsx_RoiSetAuto-13.zip Distance px	132	7848.71	0.856525	562.261	13.9592	562.261
FTT-07f_m67_003	FTT	FTT-07f_m67_003.xlsx_RoiSetAuto-14.zip Distance px	88	7169.46	0.757497	562.261	12.7511	562.261
FTT-07f_m67_003	FTT	FTT-07f_m67_003.xlsx_RoiSetAuto-16.zip Distance px	32	6818.28	0.595352	562.261	12.1265	562.261
FTT-07f_m67_003	FTT	FTT-07f_m67_003.xlsx_RoiSetAuto-17.zip Distance px	40	6895.05	0.562532	562.261	12.2631	562.261
FTT-07f_m67_003	FTT	FTT-07f_m67_003.xlsx_RoiSetAuto-19.zip Distance px	148	8967.47	0.917001	562.261	15.949	562.261
FTT-07f_m67_003	FTT	FTT-07f_m67_003.xlsx_RoiSetAuto-2.zip Distance px	68	7534.23	1.13038	562.261	13.3999	562.261
FTT-07f_m67_003	FTT	FTT-07f_m67_003.xlsx_RoiSetAuto-20.zip Distance px	20	6496.12	0.378907	562.261	11.5536	562.261
FTT-07f_m67_003	FTT	FTT-07f_m67_003.xlsx_RoiSetAuto-21.zip Distance px	16	6734.67	0.289061	562.261	11.9778	562.261
FTT-07f_m67_003	FTT	FTT-07f_m67_003.xlsx_RoiSetAuto-24.zip Distance px	24	7795.2	0.412677	562.261	13.864	562.261
FTT-07f_m67_003	FTT	FTT-07f_m67_003.xlsx_RoiSetAuto-26.zip Distance px	20	7762.11	0.493064	562.261	13.8052	562.261
FTT-07f_m67_003	FTT	FTT-07f_m67_003.xlsx_RoiSetAuto-27.zip Distance px	20	7471.01	0.143451	562.261	13.2874	562.261
FTT-07f_m67_003	FTT	FTT-07f_m67_003.xlsx_RoiSetAuto-28.zip Distance px	16	7926.94	0.508792	562.261	14.0983	562.261
FTT-07f_m67_003	FTT	FTT-07f_m67_003.xlsx_RoiSetAuto-29.zip Distance px	20	7289.38	0.563093	562.261	12.9644	562.261
FTT-07f_m67_003	FTT	FTT-07f_m67_003.xlsx_RoiSetAuto-3.zip Distance px	24	4765.26	0.569778	562.261	8.47518	562.261
FTT-07f_m67_003	FTT	FTT-07f_m67_003.xlsx_RoiSetAuto-30.zip Distance px	72	8738.73	0.84383	562.261	15.5421	562.261
FTT-07f_m67_003	FTT	FTT-07f_m67_003.xlsx_RoiSetAuto-5.zip Distance px	80	6537.7	0.829536	562.261	11.6275	562.261
FTT-07f_m67_003	FTT	FTT-07f_m67_003.xlsx_RoiSetAuto-6.zip Distance px	24	7336.45	0.529084	562.261	13.0481	562.261
FTT-07f_m67_003	FTT	FTT-07f_m67_003.xlsx_RoiSetAuto-8.zip Distance px	36	8905.7	0.976797	562.261	15.8391	562.261
FTT-07f_m67_003	FTT	FTT-07f_m67_003.xlsx_RoiSetAuto-9.zip Distance px	36	5802.99	0.317965	562.261	10.3208	562.261
GMA-01f_m67_002	GMA	GMA-01f_m67_002.xlsx_m67_RoiSetAuto-1.zip Distance px	24	20863.2	0.281289	951.747	21.921	951.747
GMA-01f_m67_002	GMA	GMA-01f_m67_002.xlsx_m67_RoiSetAuto-10.zip Distance px	44	13167.7	0.555209	951.747	13.8353	951.747
GMA-01f_m67_002	GMA	GMA-01f_m67_002.xlsx_m67_RoiSetAuto-11.zip Distance px	44	15547.6	0.607835	951.747	16.3359	951.747
GMA-01f_m67_002	GMA	GMA-01f_m67_002.xlsx_m67_RoiSetAuto-12.zip Distance px	60	15860.3	1.05201	951.747	16.6645	951.747
GMA-01f_m67_002	GMA	GMA-01f_m67_002.xlsx_m67_RoiSetAuto-13.zip Distance px	24	8727.27	0.536429	951.747	9.16974	951.747
GMA-01f_m67_002	GMA	GMA-01f_m67_002.xlsx_m67_RoiSetAuto-14.zip Distance px	32	9075.43	0.563854	951.747	9.53555	951.747
GMA-01f_m67_002	GMA	GMA-01f_m67_002.xlsx_m67_RoiSetAuto-15.zip Distance px	32	13336.3	1.00369	951.747	14.0124	951.747
GMA-01f_m67_002	GMA	GMA-01f_m67_002.xlsx_m67_RoiSetAuto-17.zip Distance px	28	8764.42	0.386756	951.747	9.20877	951.747
GMA-01f_m67_002	GMA	GMA-01f_m67_002.xlsx_m67_RoiSetAuto-18.zip Distance px	36	13381.6	0.76342	951.747	14.06	951.747
GMA-01f_m67_002	GMA	GMA-01f_m67_002.xlsx_m67_RoiSetAuto-19.zip Distance px	44	9769.82	0.876143	951.747	10.2651	951.747
GMA-01f_m67_002	GMA	GMA-01f_m67_002.xlsx_m67_RoiSetAuto-2.zip Distance px	32	12635.4	0.56284	951.747	13.276	951.747
GMA-01f_m67_002	GMA	GMA-01f_m67_002.xlsx_m67_RoiSetAuto-20.zip Distance px	124	17831.7	1.12529	951.747	18.7358	951.747
GMA-01f_m67_002	GMA	GMA-01f_m67_002.xlsx_m67_RoiSetAuto-21.zip Distance px	208	13582.9	1.37889	951.747	14.2715	951.747
GMA-01f_m67_002	GMA	GMA-01f_m67_002.xlsx_m67_RoiSetAuto-22.zip Distance px	16	10220.1	0.298441	951.747	10.7383	951.747
GMA-01f_m67_002	GMA	GMA-01f_m67_002.xlsx_m67_RoiSetAuto-23.zip Distance px	104	16577.6	0.848117	951.747	17.4181	951.747
GMA-01f_m67_002	GMA	GMA-01f_m67_002.xlsx_m67_RoiSetAuto-24.zip Distance px	108	17730.8	1.30879	951.747	18.6298	951.747
GMA-01f_m67_002	GMA	GMA-01f_m67_002.xlsx_m67_RoiSetAuto-26.zip Distance px	108	15640.9	1.17226	951.747	16.4338	951.747
GMA-01f_m67_002	GMA	GMA-01f_m67_002.xlsx_m67_RoiSetAuto-27.zip Distance px	32	10797.4	0.346177	951.747	11.3448	951.747
GMA-01f_m67_002	GMA	GMA-01f_m67_002.xlsx_m67_RoiSetAuto-29.zip Distance px	52	13626.1	0.685451	951.747	14.3169	951.747
GMA-01f_m67_002	GMA	GMA-01f_m67_002.xlsx_m67_RoiSetAuto-3.zip Distance px	136	15561.3	1.1179	951.747	16.3503	951.747
GMA-01f_m67_002	GMA	GMA-01f_m67_002.xlsx_m67_RoiSetAuto-30.zip Distance px	68	16506.6	1.04634	951.747	17.3435	951.747
GMA-01f_m67_002	GMA	GMA-01f_m67_002.xlsx_m67_RoiSetAuto-31.zip Distance px	48	9524.71	0.582088	951.747	10.0076	951.747
GMA-01f_m67_002	GMA	GMA-01f_m67_002.xlsx_m67_RoiSetAuto-32.zip Distance px	60	15229.5	1.1787	951.747	16.0016	951.747
GMA-01f_m67_002	GMA	GMA-01f_m67_002.xlsx_m67_RoiSetAuto-33.zip Distance px	24	12971.2	0.81285	951.747	13.6288	951.747
GMA-01f_m67_002	GMA	GMA-01f_m67_002.xlsx_m67_RoiSetAuto-35.zip Distance px	80	16248.1	0.887333	951.747	17.0718	951.747
GMA-01f_m67_002	GMA	GMA-01f_m67_002.xlsx_m67_RoiSetAuto-36.zip Distance px	52	11666	0.857086	951.747	12.2574	951.747
GMA-01f_m67_002	GMA	GMA-01f_m67_002.xlsx_m67_RoiSetAuto-37.zip Distance px	20	10058.9	0.360093	951.747	10.5689	951.747
GMA-01f_m67_002	GMA	GMA-01f_m67_002.xlsx_m67_RoiSetAuto-38.zip Distance px	16	11181	0.462545	951.747	11.7478	951.747
GMA-01f_m67_002	GMA	GMA-01f_m67_002.xlsx_m67_RoiSetAuto-39.zip Distance px	16	10842.7	0.159927	951.747	11.3924	951.747
GMA-01f_m67_002	GMA	GMA-01f_m67_002.xlsx_m67_RoiSetAuto-4.zip Distance px	32	11915.5	0.696415	951.747	12.5196	951.747
GMA-01f_m67_002	GMA	GMA-01f_m67_002.xlsx_m67_RoiSetAuto-40.zip Distance px	28	10947.3	0.408829	951.747	11.5023	951.747
GMA-01f_m67_002	GMA	GMA-01f_m67_002.xlsx_m67_RoiSetAuto-42.zip Distance px	16	9264.09	0.392461	951.747	9.73377	951.747
GMA-01f_m67_002	GMA	GMA-01f_m67_002.xlsx_m67_RoiSetAuto-43.zip Distance px	104	12188.6	1.15885	951.747	12.8065	951.747
GMA-01f_m67_002	GMA	GMA-01f_m67_002.xlsx_m67_RoiSetAuto-44.zip Distance px	16	11215	0.342651	951.747	11.7836	951.747
GMA-01f_m67_002	GMA	GMA-01f_m67_002.xlsx_m67_RoiSetAuto-45.zip Distance px	16	10923.1	0.0509863	951.747	11.4769	951.747
GMA-01f_m67_002	GMA	GMA-01f_m67_002.xlsx_m67_RoiSetAuto-46.zip Distance px	16	9361.06	0.268212	951.747	9.83566	951.747
GMA-01f_m67_002	GMA	GMA-01f_m67_002.xlsx_m67_RoiSetAuto-47.zip Distance px	28	13687.2	0.323486	951.747	14.3811	951.747
GMA-01f_m67_002	GMA	GMA-01f_m67_002.xlsx_m67_RoiSetAuto-48.zip Distance px	52	12919.8	0.745301	951.747	13.5748	951.747
GMA-01f_m67_002	GMA	GMA-01f_m67_002.xlsx_m67_RoiSetAuto-49.zip Distance px	48	15281.7	0.68297	951.747	16.0565	951.747
GMA-01f_m67_002	GMA	GMA-01f_m67_002.xlsx_m67_RoiSetAuto-5.zip Distance px	36	17294.9	0.619992	951.747	18.1717	951.747
GMA-01f_m67_002	GMA	GMA-01f_m67_002.xlsx_m67_RoiSetAuto-50.zip Distance px	24	15824.2	0.759156	951.747	16.6264	951.747
GMA-01f_m67_002	GMA	GMA-01f_m67_002.xlsx_m67_RoiSetAuto-51.zip Distance px	24	12632.6	0.677392	951.747	13.2731	951.747
GMA-01f_m67_002	GMA	GMA-01f_m67_002.xlsx_m67_RoiSetAuto-52.zip Distance px	28	11342.2	0.346629	951.747	11.9172	951.747
GMA-01f_m67_002	GMA	GMA-01f_m67_002.xlsx_m67_RoiSetAuto-53.zip Distance px	40	12250.7	0.518559	951.747	12.8718	951.747
GMA-01f_m67_002	GMA	GMA-01f_m67_002.xlsx_m67_RoiSetAuto-54.zip Distance px	40	16445.9	0.817567	951.747	17.2796	951.747
GMA-01f_m67_002	GMA	GMA-01f_m67_002.xlsx_m67_RoiSetAuto-55.zip Distance px	28	14518	0.90527	951.747	15.2541	951.747
GMA-01f_m67_002	GMA	GMA-01f_m67_002.xlsx_m67_RoiSetAuto-57.zip Distance px	16	14983.7	0.501703	951.747	15.7434	951.747
GMA-01f_m67_002	GMA	GMA-01f_m67_002.xlsx_m67_RoiSetAuto-6.zip Distance px	32	17202.8	0.953769	951.747	18.075	951.747
GMA-01f_m67_002	GMA	GMA-01f_m67_002.xlsx_m67_RoiSetAuto-7.zip Distance px	160	20579.5	1.62814	951.747	21.6229	951.747
GMA-01f_m67_002	GMA	GMA-01f_m67_002.xlsx_m67_RoiSetAuto-8.zip Distance px	16	18969	0.364258	951.747	19.9307	951.747
GMA-01f_m67_002	GMA	GMA-01f_m67_002.xlsx_m67_RoiSetAuto-9.zip Distance px	24	12372.1	0.801285	951.747	12.9994	951.747
GMA-01f_m67_003	GMA	GMA-01f_m67_003.xlsx_m67_RoiSetAuto-1.zip Distance px	52	11891.1	0.899874	613.194	19.3921	613.194
GMA-01f_m67_003	GMA	GMA-01f_m67_003.xlsx_m67_RoiSetAuto-100.zip Distance px	20	7056.61	0.762864	613.194	11.5079	613.194
GMA-01f_m67_003	GMA	GMA-01f_m67_003.xlsx_m67_RoiSetAuto-101.zip Distance px	20	7546.25	0.28768	613.194	12.3065	613.194
GMA-01f_m67_003	GMA	GMA-01f_m67_003.xlsx_m67_RoiSetAuto-102.zip Distance px	52	8365.2	0.84635	613.194	13.642	613.194
GMA-01f_m67_003	GMA	GMA-01f_m67_003.xlsx_m67_RoiSetAuto-103.zip Distance px	96	13903.1	0.854656	613.194	22.6732	613.194
GMA-01f_m67_003	GMA	GMA-01f_m67_003.xlsx_m67_RoiSetAuto-104.zip Distance px	32	7140.48	0.323283	613.194	11.6447	613.194
GMA-01f_m67_003	GMA	GMA-01f_m67_003.xlsx_m67_RoiSetAuto-105.zip Distance px	40	8965.19	0.614396	613.194	14.6205	613.194
GMA-01f_m67_003	GMA	GMA-01f_m67_003.xlsx_m67_RoiSetAuto-106.zip Distance px	20	8842.34	0.367619	613.194	14.4201	613.194
GMA-01f_m67_003	GMA	GMA-01f_m67_003.xlsx_m67_RoiSetAuto-107.zip Distance px	40	9331.3	0.811788	613.194	15.2175	613.194
GMA-01f_m67_003	GMA	GMA-01f_m67_003.xlsx_m67_RoiSetAuto-108.zip Distance px	16	7802.65	0.357863	613.194	12.7246	613.194
GMA-01f_m67_003	GMA	GMA-01f_m67_003.xlsx_m67_RoiSetAuto-11.zip Distance px	208	13427.8	1.2245	613.194	21.8981	613.194
GMA-01f_m67_003	GMA	GMA-01f_m67_003.xlsx_m67_RoiSetAuto-111.zip Distance px	28	9869.94	0.767752	613.194	16.096	613.194
GMA-01f_m67_003	GMA	GMA-01f_m67_003.xlsx_m67_RoiSetAuto-112.zip Distance px	72	10692.3	0.756226	613.194	17.437	613.194
GMA-01f_m67_003	GMA	GMA-01f_m67_003.xlsx_m67_RoiSetAuto-115.zip Distance px	16	8178.88	0.733044	613.194	13.3382	613.194
GMA-01f_m67_003	GMA	GMA-01f_m67_003.xlsx_m67_RoiSetAuto-116.zip Distance px	36	10403.1	0.828673	613.194	16.9655	613.194
GMA-01f_m67_003	GMA	GMA-01f_m67_003.xlsx_m67_RoiSetAuto-118.zip Distance px	60	11056.8	0.856648	613.194	18.0314	613.194
GMA-01f_m67_003	GMA	GMA-01f_m67_003.xlsx_m67_RoiSetAuto-12.zip Distance px	16	5978.56	0.304026	613.194	9.74987	613.194
GMA-01f_m67_003	GMA	GMA-01f_m67_003.xlsx_m67_RoiSetAuto-120.zip Distance px	28	9718.35	0.635822	613.194	15.8487	613.194
GMA-01f_m67_003	GMA	GMA-01f_m67_003.xlsx_m67_RoiSetAuto-121.zip Distance px	28	8866.17	0.627719	613.194	14.459	613.194
GMA-01f_m67_003	GMA	GMA-01f_m67_003.xlsx_m67_RoiSetAuto-123.zip Distance px	20	7535.77	0.549734	613.194	12.2894	613.194
GMA-01f_m67_003	GMA	GMA-01f_m67_003.xlsx_m67_RoiSetAuto-125.zip Distance px	20	8873.24	0.923165	613.194	14.4705	613.194
GMA-01f_m67_003	GMA	GMA-01f_m67_003.xlsx_m67_RoiSetAuto-127.zip Distance px	24	6636.72	0.729192	613.194	10.8232	613.194
GMA-01f_m67_003	GMA	GMA-01f_m67_003.xlsx_m67_RoiSetAuto-128.zip Distance px	28	8450.17	0.650012	613.194	13.7806	613.194
GMA-01f_m67_003	GMA	GMA-01f_m67_003.xlsx_m67_RoiSetAuto-129.zip Distance px	28	7540.76	0.814969	613.194	12.2975	613.194
GMA-01f_m67_003	GMA	GMA-01f_m67_003.xlsx_m67_RoiSetAuto-13.zip Distance px	20	6806.21	0.286096	613.194	11.0996	613.194
GMA-01f_m67_003	GMA	GMA-01f_m67_003.xlsx_m67_RoiSetAuto-130.zip Distance px	36	10057.1	0.559207	613.194	16.4012	613.194
GMA-01f_m67_003	GMA	GMA-01f_m67_003.xlsx_m67_RoiSetAuto-131.zip Distance px	28	8141.87	0.547114	613.194	13.2778	613.194
GMA-01f_m67_003	GMA	GMA-01f_m67_003.xlsx_m67_RoiSetAuto-132.zip Distance px	20	9591.57	0.613838	613.194	15.642	613.194
GMA-01f_m67_003	GMA	GMA-01f_m67_003.xlsx_m67_RoiSetAuto-133.zip Distance px	24	8471.59	0.775192	613.194	13.8155	613.194
GMA-01f_m67_003	GMA	GMA-01f_m67_003.xlsx_m67_RoiSetAuto-134.zip Distance px	20	7558.32	0.454465	613.194	12.3261	613.194
GMA-01f_m67_003	GMA	GMA-01f_m67_003.xlsx_m67_RoiSetAuto-135.zip Distance px	16	9701.47	0.835602	613.194	15.8212	613.194
GMA-01f_m67_003	GMA	GMA-01f_m67_003.xlsx_m67_RoiSetAuto-14.zip Distance px	72	7905.21	1.1843	613.194	12.8919	613.194
GMA-01f_m67_003	GMA	GMA-01f_m67_003.xlsx_m67_RoiSetAuto-15.zip Distance px	28	6739.54	0.532032	613.194	10.9909	613.194
GMA-01f_m67_003	GMA	GMA-01f_m67_003.xlsx_m67_RoiSetAuto-16.zip Distance px	60	7434.26	0.768916	613.194	12.1238	613.194
GMA-01f_m67_003	GMA	GMA-01f_m67_003.xlsx_m67_RoiSetAuto-17.zip Distance px	40	8422.5	0.761155	613.194	13.7355	613.194
GMA-01f_m67_003	GMA	GMA-01f_m67_003.xlsx_m67_RoiSetAuto-19.zip Distance px	16	6310.84	0.699283	613.194	10.2917	613.194
GMA-01f_m67_003	GMA	GMA-01f_m67_003.xlsx_m67_RoiSetAuto-20.zip Distance px	28	6762.18	0.852414	613.194	11.0278	613.194
GMA-01f_m67_003	GMA	GMA-01f_m67_003.xlsx_m67_RoiSetAuto-21.zip Distance px	72	7880.25	1.16903	613.194	12.8512	613.194
GMA-01f_m67_003	GMA	GMA-01f_m67_003.xlsx_m67_RoiSetAuto-22.zip Distance px	48	6752.57	0.807776	613.194	11.0121	613.194
GMA-01f_m67_003	GMA	GMA-01f_m67_003.xlsx_m67_RoiSetAuto-24.zip Distance px	72	8674.99	0.821648	613.194	14.1472	613.194
GMA-01f_m67_003	GMA	GMA-01f_m67_003.xlsx_m67_RoiSetAuto-25.zip Distance px	24	6378.95	0.580288	613.194	10.4028	613.194
GMA-01f_m67_003	GMA	GMA-01f_m67_003.xlsx_m67_RoiSetAuto-26.zip Distance px	208	13884	1.25905	613.194	22.6422	613.194
GMA-01f_m67_003	GMA	GMA-01f_m67_003.xlsx_m67_RoiSetAuto-29.zip Distance px	48	9088.73	0.637541	613.194	14.8219	613.194
GMA-01f_m67_003	GMA	GMA-01f_m67_003.xlsx_m67_RoiSetAuto-3.zip Distance px	96	8826.76	1.14201	613.194	14.3947	613.194
GMA-01f_m67_003	GMA	GMA-01f_m67_003.xlsx_m67_RoiSetAuto-33.zip Distance px	24	8809.99	0.633846	613.194	14.3674	613.194
GMA-01f_m67_003	GMA	GMA-01f_m67_003.xlsx_m67_RoiSetAuto-38.zip Distance px	68	12113.9	1.26921	613.194	19.7554	613.194
GMA-01f_m67_003	GMA	GMA-01f_m67_003.xlsx_m67_RoiSetAuto-39.zip Distance px	36	7126.07	0.797134	613.194	11.6212	613.194
GMA-01f_m67_003	GMA	GMA-01f_m67_003.xlsx_m67_RoiSetAuto-4.zip Distance px	40	6649.79	0.610941	613.194	10.8445	613.194
GMA-01f_m67_003	GMA	GMA-01f_m67_003.xlsx_m67_RoiSetAuto-40.zip Distance px	36	11720.1	0.877446	613.194	19.1132	613.194
GMA-01f_m67_003	GMA	GMA-01f_m67_003.xlsx_m67_RoiSetAuto-41.zip Distance px	60	9025.45	1.29948	613.194	14.7187	613.194
GMA-01f_m67_003	GMA	GMA-01f_m67_003.xlsx_m67_RoiSetAuto-42.zip Distance px	32	9097.89	0.956201	613.194	14.8369	613.194
GMA-01f_m67_003	GMA	GMA-01f_m67_003.xlsx_m67_RoiSetAuto-44.zip Distance px	28	6807.88	0.578313	613.194	11.1023	613.194
GMA-01f_m67_003	GMA	GMA-01f_m67_003.xlsx_m67_RoiSetAuto-45.zip Distance px	60	8357.8	0.736953	613.194	13.6299	613.194
GMA-01f_m67_003	GMA	GMA-01f_m67_003.xlsx_m67_RoiSetAuto-46.zip Distance px	24	6960.82	0.444269	613.194	11.3517	613.194
GMA-01f_m67_003	GMA	GMA-01f_m67_003.xlsx_m67_RoiSetAuto-48.zip Distance px	24	5942.36	0.421925	613.194	9.69084	613.194
GMA-01f_m67_003	GMA	GMA-01f_m67_003.xlsx_m67_RoiSetAuto-49.zip Distance px	40	7633.25	0.430588	613.194	12.4483	613.194
GMA-01f_m67_003	GMA	GMA-01f_m67_003.xlsx_m67_RoiSetAuto-5.zip Distance px	48	11623	1.25836	613.194	18.9548	613.194
GMA-01f_m67_003	GMA	GMA-01f_m67_003.xlsx_m67_RoiSetAuto-50.zip Distance px	40	7202.28	0.487357	613.194	11.7455	613.194
GMA-01f_m67_003	GMA	GMA-01f_m67_003.xlsx_m67_RoiSetAuto-51.zip Distance px	48	8348.66	0.635617	613.194	13.615	613.194
GMA-01f_m67_003	GMA	GMA-01f_m67_003.xlsx_m67_RoiSetAuto-52.zip Distance px	20	6836.55	0.403338	613.194	11.1491	613.194
GMA-01f_m67_003	GMA	GMA-01f_m67_003.xlsx_m67_RoiSetAuto-53.zip Distance px	52	7000.95	0.701386	613.194	11.4172	613.194
GMA-01f_m67_003	GMA	GMA-01f_m67_003.xlsx_m67_RoiSetAuto-54.zip Distance px	48	7307.59	0.708391	613.194	11.9173	613.194
GMA-01f_m67_003	GMA	GMA-01f_m67_003.xlsx_m67_RoiSetAuto-55.zip Distance px	28	7084.58	0.517237	613.194	11.5536	613.194
GMA-01f_m67_003	GMA	GMA-01f_m67_003.xlsx_m67_RoiSetAuto-56.zip Distance px	16	8021.25	0.358105	613.194	13.0811	613.194
GMA-01f_m67_003	GMA	GMA-01f_m67_003.xlsx_m67_RoiSetAuto-57.zip Distance px	32	6965.49	1.36007	613.194	11.3594	613.194
GMA-01f_m67_003	GMA	GMA-01f_m67_003.xlsx_m67_RoiSetAuto-58.zip Distance px	76	14011	1.10083	613.194	22.8491	613.194
GMA-01f_m67_003	GMA	GMA-01f_m67_003.xlsx_m67_RoiSetAuto-59.zip Distance px	16	6824.81	0.187244	613.194	11.1299	613.194
GMA-01f_m67_003	GMA	GMA-01f_m67_003.xlsx_m67_RoiSetAuto-6.zip Distance px	48	9060.1	0.956049	613.194	14.7753	613.194
GMA-01f_m67_003	GMA	GMA-01f_m67_003.xlsx_m67_RoiSetAuto-60.zip Distance px	28	6832.17	0.356931	613.194	11.1419	613.194
GMA-01f_m67_003	GMA	GMA-01f_m67_003.xlsx_m67_RoiSetAuto-61.zip Distance px	24	6965.59	0.376673	613.194	11.3595	613.194
GMA-01f_m67_003	GMA	GMA-01f_m67_003.xlsx_m67_RoiSetAuto-63.zip Distance px	16	5274.27	0.461276	613.194	8.60131	613.194
GMA-01f_m67_003	GMA	GMA-01f_m67_003.xlsx_m67_RoiSetAuto-64.zip Distance px	28	7897.62	0.740891	613.194	12.8795	613.194
GMA-01f_m67_003	GMA	GMA-01f_m67_003.xlsx_m67_RoiSetAuto-66.zip Distance px	20	6256.34	0.479974	613.194	10.2029	613.194
GMA-01f_m67_003	GMA	GMA-01f_m67_003.xlsx_m67_RoiSetAuto-69.zip Distance px	16	9838.05	0.147431	613.194	16.044	613.194
GMA-01f_m67_003	GMA	GMA-01f_m67_003.xlsx_m67_RoiSetAuto-71.zip Distance px	24	6470.85	0.247567	613.194	10.5527	613.194
GMA-01f_m67_003	GMA	GMA-01f_m67_003.xlsx_m67_RoiSetAuto-73.zip Distance px	24	6949.85	0.552283	613.194	11.3338	613.194
GMA-01f_m67_003	GMA	GMA-01f_m67_003.xlsx_m67_RoiSetAuto-74.zip Distance px	132	13980.5	1.23069	613.194	22.7995	613.194
GMA-01f_m67_003	GMA	GMA-01f_m67_003.xlsx_m67_RoiSetAuto-75.zip Distance px	28	8133.8	0.237175	613.194	13.2646	613.194
GMA-01f_m67_003	GMA	GMA-01f_m67_003.xlsx_m67_RoiSetAuto-76.zip Distance px	168	12686.6	1.30845	613.194	20.6893	613.194
GMA-01f_m67_003	GMA	GMA-01f_m67_003.xlsx_m67_RoiSetAuto-77.zip Distance px	20	7402.56	0.414004	613.194	12.0721	613.194
GMA-01f_m67_003	GMA	GMA-01f_m67_003.xlsx_m67_RoiSetAuto-79.zip Distance px	16	6384.07	0.328993	613.194	10.4112	613.194
GMA-01f_m67_003	GMA	GMA-01f_m67_003.xlsx_m67_RoiSetAuto-8.zip Distance px	64	9239.48	0.826754	613.194	15.0678	613.194
GMA-01f_m67_003	GMA	GMA-01f_m67_003.xlsx_m67_RoiSetAuto-80.zip Distance px	20	5438.59	0.36217	613.194	8.86928	613.194
GMA-01f_m67_003	GMA	GMA-01f_m67_003.xlsx_m67_RoiSetAuto-81.zip Distance px	64	13314.4	1.21619	613.194	21.7132	613.194
GMA-01f_m67_003	GMA	GMA-01f_m67_003.xlsx_m67_RoiSetAuto-82.zip Distance px	40	8917.37	0.832662	613.194	14.5425	613.194
GMA-01f_m67_003	GMA	GMA-01f_m67_003.xlsx_m67_RoiSetAuto-83.zip Distance px	24	7718.09	0.385451	613.194	12.5867	613.194
GMA-01f_m67_003	GMA	GMA-01f_m67_003.xlsx_m67_RoiSetAuto-85.zip Distance px	16	6712.68	0.138432	613.194	10.9471	613.194
GMA-01f_m67_003	GMA	GMA-01f_m67_003.xlsx_m67_RoiSetAuto-86.zip Distance px	56	9736.38	1.2273	613.194	15.8781	613.194
GMA-01f_m67_003	GMA	GMA-01f_m67_003.xlsx_m67_RoiSetAuto-88.zip Distance px	24	7135.31	0.659044	613.194	11.6363	613.194
GMA-01f_m67_003	GMA	GMA-01f_m67_003.xlsx_m67_RoiSetAuto-89.zip Distance px	28	6551.39	0.84571	613.194	10.684	613.194
GMA-01f_m67_003	GMA	GMA-01f_m67_003.xlsx_m67_RoiSetAuto-9.zip Distance px	72	9490.46	1.09876	613.194	15.4771	613.194
GMA-01f_m67_003	GMA	GMA-01f_m67_003.xlsx_m67_RoiSetAuto-92.zip Distance px	56	7585.98	0.514309	613.194	12.3712	613.194
GMA-01f_m67_003	GMA	GMA-01f_m67_003.xlsx_m67_RoiSetAuto-94.zip Distance px	28	10720.9	1.55613	613.194	17.4837	613.194
GMA-01f_m67_003	GMA	GMA-01f_m67_003.xlsx_m67_RoiSetAuto-95.zip Distance px	40	9174.02	1.29704	613.194	14.961	613.194
GMA-01f_m67_003	GMA	GMA-01f_m67_003.xlsx_m67_RoiSetAuto-96.zip Distance px	52	8098.74	0.96929	613.194	13.2075	613.194
GMA-01f_m67_003	GMA	GMA-01f_m67_003.xlsx_m67_RoiSetAuto-99.zip Distance px	40	7222.77	0.469374	613.194	11.7789	613.194
GMA-03f_m67_001	GMA	GMA-03f_m67_001.xlsx_m67_RoiSetAuto-1.zip Distance px	44	7115.2	0.404691	651.102	10.9279	651.102
GMA-03f_m67_001	GMA	GMA-03f_m67_001.xlsx_m67_RoiSetAuto-11.zip Distance px	24	6149.61	0.437078	651.102	9.44492	651.102
GMA-03f_m67_001	GMA	GMA-03f_m67_001.xlsx_m67_RoiSetAuto-12.zip Distance px	48	9603.4	0.606854	651.102	14.7495	651.102
GMA-03f_m67_001	GMA	GMA-03f_m67_001.xlsx_m67_RoiSetAuto-13.zip Distance px	20	6768.53	0.375118	651.102	10.3955	651.102
GMA-03f_m67_001	GMA	GMA-03f_m67_001.xlsx_m67_RoiSetAuto-14.zip Distance px	52	6767.16	1.01533	651.102	10.3934	651.102
GMA-03f_m67_001	GMA	GMA-03f_m67_001.xlsx_m67_RoiSetAuto-18.zip Distance px	28	6347.74	0.407684	651.102	9.74922	651.102
GMA-03f_m67_001	GMA	GMA-03f_m67_001.xlsx_m67_RoiSetAuto-19.zip Distance px	156	12913.5	1.46099	651.102	19.8334	651.102
GMA-03f_m67_001	GMA	GMA-03f_m67_001.xlsx_m67_RoiSetAuto-2.zip Distance px	40	6826.17	0.738093	651.102	10.484	651.102
GMA-03f_m67_001	GMA	GMA-03f_m67_001.xlsx_m67_RoiSetAuto-20.zip Distance px	120	19207.9	1.2096	651.102	29.5006	651.102
GMA-03f_m67_001	GMA	GMA-03f_m67_001.xlsx_m67_RoiSetAuto-22.zip Distance px	20	7454.26	0.570776	651.102	11.4487	651.102
GMA-03f_m67_001	GMA	GMA-03f_m67_001.xlsx_m67_RoiSetAuto-23.zip Distance px	16	8002.38	0.556586	651.102	12.2905	651.102
GMA-03f_m67_001	GMA	GMA-03f_m67_001.xlsx_m67_RoiSetAuto-24.zip Distance px	28	8868.34	0.795688	651.102	13.6205	651.102
GMA-03f_m67_001	GMA	GMA-03f_m67_001.xlsx_m67_RoiSetAuto-25.zip Distance px	16	5573.43	0.756912	651.102	8.56	651.102
GMA-03f_m67_001	GMA	GMA-03f_m67_001.xlsx_m67_RoiSetAuto-26.zip Distance px	16	6050.15	0.348402	651.102	9.29216	651.102
GMA-03f_m67_001	GMA	GMA-03f_m67_001.xlsx_m67_RoiSetAuto-27.zip Distance px	20	6064.42	0.356032	651.102	9.31408	651.102
GMA-03f_m67_001	GMA	GMA-03f_m67_001.xlsx_m67_RoiSetAuto-28.zip Distance px	20	6626.09	0.447213	651.102	10.1767	651.102
GMA-03f_m67_001	GMA	GMA-03f_m67_001.xlsx_m67_RoiSetAuto-29.zip Distance px	28	8046.77	0.480672	651.102	12.3587	651.102
GMA-03f_m67_001	GMA	GMA-03f_m67_001.xlsx_m67_RoiSetAuto-3.zip Distance px	32	8756.47	0.994087	651.102	13.4487	651.102
GMA-03f_m67_001	GMA	GMA-03f_m67_001.xlsx_m67_RoiSetAuto-30.zip Distance px	20	5894.7	0.557302	651.102	9.05342	651.102
GMA-03f_m67_001	GMA	GMA-03f_m67_001.xlsx_m67_RoiSetAuto-31.zip Distance px	28	7273.82	0.507378	651.102	11.1715	651.102
GMA-03f_m67_001	GMA	GMA-03f_m67_001.xlsx_m67_RoiSetAuto-33.zip Distance px	20	6809.21	0.195854	651.102	10.458	651.102
GMA-03f_m67_001	GMA	GMA-03f_m67_001.xlsx_m67_RoiSetAuto-34.zip Distance px	16	6543.75	0.103956	651.102	10.0503	651.102
GMA-03f_m67_001	GMA	GMA-03f_m67_001.xlsx_m67_RoiSetAuto-36.zip Distance px	16	7459.36	0.309403	651.102	11.4565	651.102
GMA-03f_m67_001	GMA	GMA-03f_m67_001.xlsx_m67_RoiSetAuto-37.zip Distance px	20	7113.9	0.266977	651.102	10.9259	651.102
GMA-03f_m67_001	GMA	GMA-03f_m67_001.xlsx_m67_RoiSetAuto-38.zip Distance px	24	7431.04	0.248475	651.102	11.413	651.102
GMA-03f_m67_001	GMA	GMA-03f_m67_001.xlsx_m67_RoiSetAuto-39.zip Distance px	56	12491.7	1.03668	651.102	19.1855	651.102
GMA-03f_m67_001	GMA	GMA-03f_m67_001.xlsx_m67_RoiSetAuto-4.zip Distance px	24	13356.1	0.538124	651.102	20.5131	651.102
GMA-03f_m67_001	GMA	GMA-03f_m67_001.xlsx_m67_RoiSetAuto-40.zip Distance px	24	6261.54	0.465794	651.102	9.61683	651.102
GMA-03f_m67_001	GMA	GMA-03f_m67_001.xlsx_m67_RoiSetAuto-41.zip Distance px	20	6265.92	0.304013	651.102	9.62357	651.102
GMA-03f_m67_001	GMA	GMA-03f_m67_001.xlsx_m67_RoiSetAuto-42.zip Distance px	44	8499.59	0.523514	651.102	13.0542	651.102
GMA-03f_m67_001	GMA	GMA-03f_m67_001.xlsx_m67_RoiSetAuto-44.zip Distance px	28	8252.46	0.62602	651.102	12.6746	651.102
GMA-03f_m67_001	GMA	GMA-03f_m67_001.xlsx_m67_RoiSetAuto-45.zip Distance px	44	8284.98	0.700797	651.102	12.7245	651.102
GMA-03f_m67_001	GMA	GMA-03f_m67_001.xlsx_m67_RoiSetAuto-47.zip Distance px	24	8509.53	0.592984	651.102	13.0694	651.102
GMA-03f_m67_001	GMA	GMA-03f_m67_001.xlsx_m67_RoiSetAuto-48.zip Distance px	16	8327.15	0.415444	651.102	12.7893	651.102
GMA-03f_m67_001	GMA	GMA-03f_m67_001.xlsx_m67_RoiSetAuto-5.zip Distance px	20	6531.24	0.403152	651.102	10.031	651.102
GMA-03f_m67_001	GMA	GMA-03f_m67_001.xlsx_m67_RoiSetAuto-7.zip Distance px	20	6376.94	0.211465	651.102	9.79407	651.102
GMA-03f_m67_001	GMA	GMA-03f_m67_001.xlsx_m67_RoiSetAuto-8.zip Distance px	136	11413.1	1.07914	651.102	17.529	651.102
GMA-03f_m67_001	GMA	GMA-03f_m67_001.xlsx_m67_RoiSetAuto-9.zip Distance px	20	6678.29	0.666129	651.102	10.2569	651.102
GMA-03f_m67_002	GMA	GMA-03f_m67_002.xlsx_m67_RoiSetAuto-1.zip Distance px	84	23754	1.26093	1163.02	20.4244	1163.02
GMA-03f_m67_002	GMA	GMA-03f_m67_002.xlsx_m67_RoiSetAuto-10.zip Distance px	64	16369.1	0.9983	1163.02	14.0747	1163.02
GMA-03f_m67_002	GMA	GMA-03f_m67_002.xlsx_m67_RoiSetAuto-12.zip Distance px	24	21049.3	0.750881	1163.02	18.0988	1163.02
GMA-03f_m67_002	GMA	GMA-03f_m67_002.xlsx_m67_RoiSetAuto-13.zip Distance px	40	18181.6	0.480854	1163.02	15.633	1163.02
GMA-03f_m67_002	GMA	GMA-03f_m67_002.xlsx_m67_RoiSetAuto-14.zip Distance px	36	11289.1	0.393356	1163.02	9.70671	1163.02
GMA-03f_m67_002	GMA	GMA-03f_m67_002.xlsx_m67_RoiSetAuto-15.zip Distance px	36	13179.7	0.473503	1163.02	11.3323	1163.02
GMA-03f_m67_002	GMA	GMA-03f_m67_002.xlsx_m67_RoiSetAuto-16.zip Distance px	32	9847.9	0.420966	1163.02	8.46751	1163.02
GMA-03f_m67_002	GMA	GMA-03f_m67_002.xlsx_m67_RoiSetAuto-17.zip Distance px	28	10468.9	0.378264	1163.02	9.00147	1163.02
GMA-03f_m67_002	GMA	GMA-03f_m67_002.xlsx_m67_RoiSetAuto-18.zip Distance px	64	17345	0.672773	1163.02	14.9137	1163.02
GMA-03f_m67_002	GMA	GMA-03f_m67_002.xlsx_m67_RoiSetAuto-19.zip Distance px	104	18860.8	1.10783	1163.02	16.2171	1163.02
GMA-03f_m67_002	GMA	GMA-03f_m67_002.xlsx_m67_RoiSetAuto-2.zip Distance px	20	9755.48	0.166498	1163.02	8.38804	1163.02
GMA-03f_m67_002	GMA	GMA-03f_m67_002.xlsx_m67_RoiSetAuto-20.zip Distance px	28	10609.2	0.362694	1163.02	9.12208	1163.02
GMA-03f_m67_002	GMA	GMA-03f_m67_002.xlsx_m67_RoiSetAuto-21.zip Distance px	40	18067.9	0.628115	1163.02	15.5353	1163.02
GMA-03f_m67_002	GMA	GMA-03f_m67_002.xlsx_m67_RoiSetAuto-22.zip Distance px	36	9974.18	0.444006	1163.02	8.57609	1163.02
GMA-03f_m67_002	GMA	GMA-03f_m67_002.xlsx_m67_RoiSetAuto-23.zip Distance px	20	11594.7	0.293589	1163.02	9.96949	1163.02
GMA-03f_m67_002	GMA	GMA-03f_m67_002.xlsx_m67_RoiSetAuto-24.zip Distance px	40	12800.1	0.789331	1163.02	11.0059	1163.02
GMA-03f_m67_002	GMA	GMA-03f_m67_002.xlsx_m67_RoiSetAuto-25.zip Distance px	36	13418.2	0.560824	1163.02	11.5374	1163.02
GMA-03f_m67_002	GMA	GMA-03f_m67_002.xlsx_m67_RoiSetAuto-26.zip Distance px	16	11785.8	0.480388	1163.02	10.1338	1163.02
GMA-03f_m67_002	GMA	GMA-03f_m67_002.xlsx_m67_RoiSetAuto-27.zip Distance px	24	12941.3	0.332292	1163.02	11.1273	1163.02
GMA-03f_m67_002	GMA	GMA-03f_m67_002.xlsx_m67_RoiSetAuto-28.zip Distance px	24	12976.1	0.372828	1163.02	11.1572	1163.02
GMA-03f_m67_002	GMA	GMA-03f_m67_002.xlsx_m67_RoiSetAuto-29.zip Distance px	36	11021.2	0.370835	1163.02	9.47632	1163.02
GMA-03f_m67_002	GMA	GMA-03f_m67_002.xlsx_m67_RoiSetAuto-3.zip Distance px	40	14883.7	0.504299	1163.02	12.7975	1163.02
GMA-03f_m67_002	GMA	GMA-03f_m67_002.xlsx_m67_RoiSetAuto-30.zip Distance px	64	24114.3	1.13163	1163.02	20.7342	1163.02
GMA-03f_m67_002	GMA	GMA-03f_m67_002.xlsx_m67_RoiSetAuto-31.zip Distance px	52	20320.2	1.65516	1163.02	17.4719	1163.02
GMA-03f_m67_002	GMA	GMA-03f_m67_002.xlsx_m67_RoiSetAuto-32.zip Distance px	28	17181.8	0.666402	1163.02	14.7734	1163.02
GMA-03f_m67_002	GMA	GMA-03f_m67_002.xlsx_m67_RoiSetAuto-33.zip Distance px	32	12541.9	0.370092	1163.02	10.7839	1163.02
GMA-03f_m67_002	GMA	GMA-03f_m67_002.xlsx_m67_RoiSetAuto-34.zip Distance px	16	11864.7	0.297265	1163.02	10.2016	1163.02
GMA-03f_m67_002	GMA	GMA-03f_m67_002.xlsx_m67_RoiSetAuto-36.zip Distance px	24	13753.1	0.449649	1163.02	11.8253	1163.02
GMA-03f_m67_002	GMA	GMA-03f_m67_002.xlsx_m67_RoiSetAuto-37.zip Distance px	96	30041.3	1.14392	1163.02	25.8304	1163.02
GMA-03f_m67_002	GMA	GMA-03f_m67_002.xlsx_m67_RoiSetAuto-38.zip Distance px	16	10929.2	0.532364	1163.02	9.39722	1163.02
GMA-03f_m67_002	GMA	GMA-03f_m67_002.xlsx_m67_RoiSetAuto-39.zip Distance px	36	11693.1	0.607812	1163.02	10.0541	1163.02
GMA-03f_m67_002	GMA	GMA-03f_m67_002.xlsx_m67_RoiSetAuto-4.zip Distance px	32	19475.6	0.287288	1163.02	16.7457	1163.02
GMA-03f_m67_002	GMA	GMA-03f_m67_002.xlsx_m67_RoiSetAuto-40.zip Distance px	24	10824.6	0.580322	1163.02	9.30728	1163.02
GMA-03f_m67_002	GMA	GMA-03f_m67_002.xlsx_m67_RoiSetAuto-41.zip Distance px	80	15203.3	0.792849	1163.02	13.0722	1163.02
GMA-03f_m67_002	GMA	GMA-03f_m67_002.xlsx_m67_RoiSetAuto-42.zip Distance px	72	13070.5	0.858305	1163.02	11.2384	1163.02
GMA-03f_m67_002	GMA	GMA-03f_m67_002.xlsx_m67_RoiSetAuto-43.zip Distance px	204	18886.2	0.867847	1163.02	16.2389	1163.02
GMA-03f_m67_002	GMA	GMA-03f_m67_002.xlsx_m67_RoiSetAuto-44.zip Distance px	112	21542.3	1.14832	1163.02	18.5227	1163.02
GMA-03f_m67_002	GMA	GMA-03f_m67_002.xlsx_m67_RoiSetAuto-45.zip Distance px	16	18863	1.27548	1163.02	16.219	1163.02
GMA-03f_m67_002	GMA	GMA-03f_m67_002.xlsx_m67_RoiSetAuto-46.zip Distance px	40	19087.8	0.592677	1163.02	16.4122	1163.02
GMA-03f_m67_002	GMA	GMA-03f_m67_002.xlsx_m67_RoiSetAuto-47.zip Distance px	40	12950.7	0.60084	1163.02	11.1354	1163.02
GMA-03f_m67_002	GMA	GMA-03f_m67_002.xlsx_m67_RoiSetAuto-48.zip Distance px	64	17356.8	1.1534	1163.02	14.9239	1163.02
GMA-03f_m67_002	GMA	GMA-03f_m67_002.xlsx_m67_RoiSetAuto-5.zip Distance px	20	10564.4	0.437644	1163.02	9.08361	1163.02
GMA-03f_m67_002	GMA	GMA-03f_m67_002.xlsx_m67_RoiSetAuto-50.zip Distance px	20	15579.4	0.493217	1163.02	13.3956	1163.02
GMA-03f_m67_002	GMA	GMA-03f_m67_002.xlsx_m67_RoiSetAuto-51.zip Distance px	24	12448.1	0.127444	1163.02	10.7032	1163.02
GMA-03f_m67_002	GMA	GMA-03f_m67_002.xlsx_m67_RoiSetAuto-52.zip Distance px	16	12718.8	0.248715	1163.02	10.936	1163.02
GMA-03f_m67_002	GMA	GMA-03f_m67_002.xlsx_m67_RoiSetAuto-53.zip Distance px	20	14943.1	1.29686	1163.02	12.8485	1163.02
GMA-03f_m67_002	GMA	GMA-03f_m67_002.xlsx_m67_RoiSetAuto-54.zip Distance px	52	19330.8	0.967258	1163.02	16.6212	1163.02
GMA-03f_m67_002	GMA	GMA-03f_m67_002.xlsx_m67_RoiSetAuto-55.zip Distance px	56	14980.3	0.449256	1163.02	12.8805	1163.02
GMA-03f_m67_002	GMA	GMA-03f_m67_002.xlsx_m67_RoiSetAuto-56.zip Distance px	24	12809	0.333387	1163.02	11.0136	1163.02
GMA-03f_m67_002	GMA	GMA-03f_m67_002.xlsx_m67_RoiSetAuto-57.zip Distance px	92	18093.7	0.986774	1163.02	15.5575	1163.02
GMA-03f_m67_002	GMA	GMA-03f_m67_002.xlsx_m67_RoiSetAuto-58.zip Distance px	36	12368.3	0.490785	1163.02	10.6346	1163.02
GMA-03f_m67_002	GMA	GMA-03f_m67_002.xlsx_m67_RoiSetAuto-59.zip Distance px	96	31334.5	1.22605	1163.02	26.9423	1163.02
GMA-03f_m67_002	GMA	GMA-03f_m67_002.xlsx_m67_RoiSetAuto-6.zip Distance px	140	17580.7	1.04044	1163.02	15.1164	1163.02
GMA-03f_m67_002	GMA	GMA-03f_m67_002.xlsx_m67_RoiSetAuto-60.zip Distance px	196	45086.7	1.18478	1163.02	38.7669	1163.02
GMA-03f_m67_002	GMA	GMA-03f_m67_002.xlsx_m67_RoiSetAuto-61.zip Distance px	32	14308.5	0.506901	1163.02	12.3028	1163.02
GMA-03f_m67_002	GMA	GMA-03f_m67_002.xlsx_m67_RoiSetAuto-62.zip Distance px	16	11663.6	0.341616	1163.02	10.0287	1163.02
GMA-03f_m67_002	GMA	GMA-03f_m67_002.xlsx_m67_RoiSetAuto-63.zip Distance px	44	13040	0.412991	1163.02	11.2122	1163.02
GMA-03f_m67_002	GMA	GMA-03f_m67_002.xlsx_m67_RoiSetAuto-64.zip Distance px	60	20534.6	0.892974	1163.02	17.6562	1163.02
GMA-03f_m67_002	GMA	GMA-03f_m67_002.xlsx_m67_RoiSetAuto-65.zip Distance px	32	13515.6	0.513175	1163.02	11.6211	1163.02
GMA-03f_m67_002	GMA	GMA-03f_m67_002.xlsx_m67_RoiSetAuto-66.zip Distance px	44	14048.2	0.917551	1163.02	12.079	1163.02
GMA-03f_m67_002	GMA	GMA-03f_m67_002.xlsx_m67_RoiSetAuto-67.zip Distance px	64	17371.6	0.513782	1163.02	14.9366	1163.02
GMA-03f_m67_002	GMA	GMA-03f_m67_002.xlsx_m67_RoiSetAuto-68.zip Distance px	72	19614.6	0.754287	1163.02	16.8652	1163.02
GMA-03f_m67_002	GMA	GMA-03f_m67_002.xlsx_m67_RoiSetAuto-69.zip Distance px	156	26899.1	1.14778	1163.02	23.1287	1163.02
GMA-03f_m67_002	GMA	GMA-03f_m67_002.xlsx_m67_RoiSetAuto-7.zip Distance px	160	21309.3	1.43134	1163.02	18.3224	1163.02
GMA-03f_m67_002	GMA	GMA-03f_m67_002.xlsx_m67_RoiSetAuto-70.zip Distance px	24	14989.7	0.409257	1163.02	12.8886	1163.02
GMA-03f_m67_002	GMA	GMA-03f_m67_002.xlsx_m67_RoiSetAuto-71.zip Distance px	40	20644.1	1.1939	1163.02	17.7504	1163.02
GMA-03f_m67_002	GMA	GMA-03f_m67_002.xlsx_m67_RoiSetAuto-72.zip Distance px	16	11935.6	0.228093	1163.02	10.2626	1163.02
GMA-03f_m67_002	GMA	GMA-03f_m67_002.xlsx_m67_RoiSetAuto-73.zip Distance px	16	14482.2	0.548846	1163.02	12.4522	1163.02
GMA-03f_m67_002	GMA	GMA-03f_m67_002.xlsx_m67_RoiSetAuto-74.zip Distance px	76	17995.2	0.839527	1163.02	15.4728	1163.02
GMA-03f_m67_002	GMA	GMA-03f_m67_002.xlsx_m67_RoiSetAuto-75.zip Distance px	32	15710.3	0.494888	1163.02	13.5082	1163.02
GMA-03f_m67_002	GMA	GMA-03f_m67_002.xlsx_m67_RoiSetAuto-76.zip Distance px	16	13961.9	0.204244	1163.02	12.0049	1163.02
GMA-03f_m67_002	GMA	GMA-03f_m67_002.xlsx_m67_RoiSetAuto-77.zip Distance px	24	12563.6	0.392141	1163.02	10.8025	1163.02
GMA-03f_m67_002	GMA	GMA-03f_m67_002.xlsx_m67_RoiSetAuto-78.zip Distance px	104	28573.5	1.0615	1163.02	24.5683	1163.02
GMA-03f_m67_002	GMA	GMA-03f_m67_002.xlsx_m67_RoiSetAuto-79.zip Distance px	16	11637	0.369507	1163.02	10.0058	1163.02
GMA-03f_m67_002	GMA	GMA-03f_m67_002.xlsx_m67_RoiSetAuto-8.zip Distance px	128	45564	0.707182	1163.02	39.1773	1163.02
GMA-03f_m67_002	GMA	GMA-03f_m67_002.xlsx_m67_RoiSetAuto-80.zip Distance px	56	20117.3	0.971779	1163.02	17.2974	1163.02
GMA-03f_m67_002	GMA	GMA-03f_m67_002.xlsx_m67_RoiSetAuto-81.zip Distance px	60	17888.4	0.659548	1163.02	15.381	1163.02
GMA-03f_m67_002	GMA	GMA-03f_m67_002.xlsx_m67_RoiSetAuto-82.zip Distance px	76	32878.5	0.95444	1163.02	28.2699	1163.02
GMA-03f_m67_002	GMA	GMA-03f_m67_002.xlsx_m67_RoiSetAuto-83.zip Distance px	16	11583.9	0.337452	1163.02	9.96021	1163.02
GMA-03f_m67_002	GMA	GMA-03f_m67_002.xlsx_m67_RoiSetAuto-84.zip Distance px	36	14777.2	0.37817	1163.02	12.7059	1163.02
GMA-03f_m67_002	GMA	GMA-03f_m67_002.xlsx_m67_RoiSetAuto-85.zip Distance px	16	13883.1	0.424326	1163.02	11.9371	1163.02
GMA-03f_m67_002	GMA	GMA-03f_m67_002.xlsx_m67_RoiSetAuto-86.zip Distance px	76	29765.9	1.13548	1163.02	25.5936	1163.02
GMA-03f_m67_002	GMA	GMA-03f_m67_002.xlsx_m67_RoiSetAuto-87.zip Distance px	36	17430.1	0.466758	1163.02	14.9869	1163.02
GMA-03f_m67_002	GMA	GMA-03f_m67_002.xlsx_m67_RoiSetAuto-88.zip Distance px	16	13400.5	0.130307	1163.02	11.5221	1163.02
GMA-03f_m67_002	GMA	GMA-03f_m67_002.xlsx_m67_RoiSetAuto-89.zip Distance px	68	15120.5	0.558555	1163.02	13.001	1163.02
GMA-03f_m67_002	GMA	GMA-03f_m67_002.xlsx_m67_RoiSetAuto-9.zip Distance px	280	37044.8	1.76279	1163.02	31.8522	1163.02
GMA-03f_m67_002	GMA	GMA-03f_m67_002.xlsx_m67_RoiSetAuto-90.zip Distance px	56	17770.5	0.568516	1163.02	15.2795	1163.02
GMA-03f_m67_002	GMA	GMA-03f_m67_002.xlsx_m67_RoiSetAuto-91.zip Distance px	20	12175.9	0.113375	1163.02	10.4692	1163.02
GMA-03f_m67_002	GMA	GMA-03f_m67_002.xlsx_m67_RoiSetAuto-92.zip Distance px	24	12452.3	0.456935	1163.02	10.7069	1163.02
GMA-03f_m67_002	GMA	GMA-03f_m67_002.xlsx_m67_RoiSetAuto-93.zip Distance px	36	23108.7	0.560163	1163.02	19.8695	1163.02
GMA-03f_m67_002	GMA	GMA-03f_m67_002.xlsx_m67_RoiSetAuto-94.zip Distance px	16	13323.1	0.518059	1163.02	11.4556	1163.02
GMA-03f_m67_002	GMA	GMA-03f_m67_002.xlsx_m67_RoiSetAuto-95.zip Distance px	16	18184	0.688935	1163.02	15.6352	1163.02
GMA-03f_m67_002	GMA	GMA-03f_m67_002.xlsx_m67_RoiSetAuto-96.zip Distance px	16	15878	0.269048	1163.02	13.6523	1163.02
GMA-03f_m67_002	GMA	GMA-03f_m67_002.xlsx_m67_RoiSetAuto-97.zip Distance px	20	18318.6	0.63241	1163.02	15.7509	1163.02
GMA-03f_m67_002	GMA	GMA-03f_m67_002.xlsx_m67_RoiSetAuto-98.zip Distance px	16	13835.9	0.391853	1163.02	11.8965	1163.02
GMA-03f_m67_003	GMA	GMA-03f_m67_003.xlsx_m67_RoiSetAuto-1.zip Distance px	184	12581.5	1.5341	459.021	27.4094	459.021
GMA-03f_m67_003	GMA	GMA-03f_m67_003.xlsx_m67_RoiSetAuto-10.zip Distance px	52	5979.98	0.667331	459.021	13.0277	459.021
GMA-03f_m67_003	GMA	GMA-03f_m67_003.xlsx_m67_RoiSetAuto-11.zip Distance px	20	5446.96	0.475941	459.021	11.8665	459.021
GMA-03f_m67_003	GMA	GMA-03f_m67_003.xlsx_m67_RoiSetAuto-12.zip Distance px	60	7480.65	1.23677	459.021	16.297	459.021
GMA-03f_m67_003	GMA	GMA-03f_m67_003.xlsx_m67_RoiSetAuto-13.zip Distance px	84	7753.67	1.19897	459.021	16.8918	459.021
GMA-03f_m67_003	GMA	GMA-03f_m67_003.xlsx_m67_RoiSetAuto-14.zip Distance px	60	6294.82	1.12202	459.021	13.7136	459.021
GMA-03f_m67_003	GMA	GMA-03f_m67_003.xlsx_m67_RoiSetAuto-15.zip Distance px	52	7582.79	0.950184	459.021	16.5195	459.021
GMA-03f_m67_003	GMA	GMA-03f_m67_003.xlsx_m67_RoiSetAuto-16.zip Distance px	196	9397.63	1.34001	459.021	20.4732	459.021
GMA-03f_m67_003	GMA	GMA-03f_m67_003.xlsx_m67_RoiSetAuto-17.zip Distance px	24	4090.91	0.463377	459.021	8.91225	459.021
GMA-03f_m67_003	GMA	GMA-03f_m67_003.xlsx_m67_RoiSetAuto-18.zip Distance px	44	5907.51	0.481654	459.021	12.8698	459.021
GMA-03f_m67_003	GMA	GMA-03f_m67_003.xlsx_m67_RoiSetAuto-19.zip Distance px	16	4292.42	0.388436	459.021	9.35125	459.021
GMA-03f_m67_003	GMA	GMA-03f_m67_003.xlsx_m67_RoiSetAuto-2.zip Distance px	144	9964.76	1.35154	459.021	21.7087	459.021
GMA-03f_m67_003	GMA	GMA-03f_m67_003.xlsx_m67_RoiSetAuto-20.zip Distance px	20	4674.17	0.330367	459.021	10.1829	459.021
GMA-03f_m67_003	GMA	GMA-03f_m67_003.xlsx_m67_RoiSetAuto-21.zip Distance px	20	5772.96	0.726127	459.021	12.5767	459.021
GMA-03f_m67_003	GMA	GMA-03f_m67_003.xlsx_m67_RoiSetAuto-22.zip Distance px	20	4420.97	0.405076	459.021	9.63131	459.021
GMA-03f_m67_003	GMA	GMA-03f_m67_003.xlsx_m67_RoiSetAuto-23.zip Distance px	76	7150.02	0.791742	459.021	15.5767	459.021
GMA-03f_m67_003	GMA	GMA-03f_m67_003.xlsx_m67_RoiSetAuto-25.zip Distance px	40	5354.24	0.427958	459.021	11.6645	459.021
GMA-03f_m67_003	GMA	GMA-03f_m67_003.xlsx_m67_RoiSetAuto-27.zip Distance px	20	5185.09	0.14965	459.021	11.296	459.021
GMA-03f_m67_003	GMA	GMA-03f_m67_003.xlsx_m67_RoiSetAuto-28.zip Distance px	148	7275.27	1.38486	459.021	15.8495	459.021
GMA-03f_m67_003	GMA	GMA-03f_m67_003.xlsx_m67_RoiSetAuto-29.zip Distance px	40	9370.95	1.15804	459.021	20.4151	459.021
GMA-03f_m67_003	GMA	GMA-03f_m67_003.xlsx_m67_RoiSetAuto-3.zip Distance px	48	6101.7	1.50252	459.021	13.2929	459.021
GMA-03f_m67_003	GMA	GMA-03f_m67_003.xlsx_m67_RoiSetAuto-30.zip Distance px	16	6253.7	0.339121	459.021	13.624	459.021
GMA-03f_m67_003	GMA	GMA-03f_m67_003.xlsx_m67_RoiSetAuto-32.zip Distance px	32	7107.78	0.673347	459.021	15.4846	459.021
GMA-03f_m67_003	GMA	GMA-03f_m67_003.xlsx_m67_RoiSetAuto-33.zip Distance px	48	7668.13	1.02821	459.021	16.7054	459.021
GMA-03f_m67_003	GMA	GMA-03f_m67_003.xlsx_m67_RoiSetAuto-34.zip Distance px	28	5460.8	0.42237	459.021	11.8966	459.021
GMA-03f_m67_003	GMA	GMA-03f_m67_003.xlsx_m67_RoiSetAuto-35.zip Distance px	28	5885.07	0.481604	459.021	12.8209	459.021
GMA-03f_m67_003	GMA	GMA-03f_m67_003.xlsx_m67_RoiSetAuto-37.zip Distance px	16	5705.55	0.676827	459.021	12.4298	459.021
GMA-03f_m67_003	GMA	GMA-03f_m67_003.xlsx_m67_RoiSetAuto-38.zip Distance px	52	6828.11	0.946166	459.021	14.8754	459.021
GMA-03f_m67_003	GMA	GMA-03f_m67_003.xlsx_m67_RoiSetAuto-39.zip Distance px	16	5400.6	0.185696	459.021	11.7655	459.021
GMA-03f_m67_003	GMA	GMA-03f_m67_003.xlsx_m67_RoiSetAuto-4.zip Distance px	16	4330.99	0.820205	459.021	9.43527	459.021
GMA-03f_m67_003	GMA	GMA-03f_m67_003.xlsx_m67_RoiSetAuto-40.zip Distance px	48	7231.71	0.789125	459.021	15.7546	459.021
GMA-03f_m67_003	GMA	GMA-03f_m67_003.xlsx_m67_RoiSetAuto-41.zip Distance px	76	6304.87	0.997796	459.021	13.7355	459.021
GMA-03f_m67_003	GMA	GMA-03f_m67_003.xlsx_m67_RoiSetAuto-42.zip Distance px	32	7369.11	0.650765	459.021	16.054	459.021
GMA-03f_m67_003	GMA	GMA-03f_m67_003.xlsx_m67_RoiSetAuto-43.zip Distance px	44	6715.31	0.614403	459.021	14.6296	459.021
GMA-03f_m67_003	GMA	GMA-03f_m67_003.xlsx_m67_RoiSetAuto-44.zip Distance px	80	11232.2	0.848132	459.021	24.4699	459.021
GMA-03f_m67_003	GMA	GMA-03f_m67_003.xlsx_m67_RoiSetAuto-45.zip Distance px	80	8452.56	0.762883	459.021	18.4143	459.021
GMA-03f_m67_003	GMA	GMA-03f_m67_003.xlsx_m67_RoiSetAuto-47.zip Distance px	44	9472.68	1.16111	459.021	20.6367	459.021
GMA-03f_m67_003	GMA	GMA-03f_m67_003.xlsx_m67_RoiSetAuto-49.zip Distance px	28	9351.07	0.434594	459.021	20.3718	459.021
GMA-03f_m67_003	GMA	GMA-03f_m67_003.xlsx_m67_RoiSetAuto-5.zip Distance px	20	4691.78	0.447463	459.021	10.2213	459.021
GMA-03f_m67_003	GMA	GMA-03f_m67_003.xlsx_m67_RoiSetAuto-50.zip Distance px	44	7745.3	0.82593	459.021	16.8735	459.021
GMA-03f_m67_003	GMA	GMA-03f_m67_003.xlsx_m67_RoiSetAuto-51.zip Distance px	16	5441.21	0.479498	459.021	11.8539	459.021
GMA-03f_m67_003	GMA	GMA-03f_m67_003.xlsx_m67_RoiSetAuto-52.zip Distance px	52	8799.99	0.954716	459.021	19.1712	459.021
GMA-03f_m67_003	GMA	GMA-03f_m67_003.xlsx_m67_RoiSetAuto-53.zip Distance px	32	10001.3	0.498936	459.021	21.7883	459.021
GMA-03f_m67_003	GMA	GMA-03f_m67_003.xlsx_m67_RoiSetAuto-54.zip Distance px	20	5900.39	0.318787	459.021	12.8543	459.021
GMA-03f_m67_003	GMA	GMA-03f_m67_003.xlsx_m67_RoiSetAuto-55.zip Distance px	16	6176.15	0.421066	459.021	13.4551	459.021
GMA-03f_m67_003	GMA	GMA-03f_m67_003.xlsx_m67_RoiSetAuto-56.zip Distance px	24	6962.03	0.39278	459.021	15.1671	459.021
GMA-03f_m67_003	GMA	GMA-03f_m67_003.xlsx_m67_RoiSetAuto-57.zip Distance px	24	7150.68	0.473613	459.021	15.5781	459.021
GMA-03f_m67_003	GMA	GMA-03f_m67_003.xlsx_m67_RoiSetAuto-6.zip Distance px	48	5071.68	1.46729	459.021	11.0489	459.021
GMA-03f_m67_003	GMA	GMA-03f_m67_003.xlsx_m67_RoiSetAuto-7.zip Distance px	20	5039.09	0.531118	459.021	10.9779	459.021
GMA-03f_m67_003	GMA	GMA-03f_m67_003.xlsx_m67_RoiSetAuto-8.zip Distance px	40	8829.13	0.839752	459.021	19.2347	459.021
GMA-03f_m67_003	GMA	GMA-03f_m67_003.xlsx_m67_RoiSetAuto-9.zip Distance px	108	5686.24	1.35062	459.021	12.3878	459.021
GMA-04f_m67_001	GMA	GMA-04f_m67_001.xlsx_m67_RoiSetAuto-1.zip Distance px	128	23647.1	1.12902	1328.73	17.7967	1328.73
GMA-04f_m67_001	GMA	GMA-04f_m67_001.xlsx_m67_RoiSetAuto-10.zip Distance px	24	14572.5	0.442457	1328.73	10.9672	1328.73
GMA-04f_m67_001	GMA	GMA-04f_m67_001.xlsx_m67_RoiSetAuto-11.zip Distance px	108	15283.5	0.940253	1328.73	11.5023	1328.73
GMA-04f_m67_001	GMA	GMA-04f_m67_001.xlsx_m67_RoiSetAuto-12.zip Distance px	56	12909.6	0.319791	1328.73	9.71568	1328.73
GMA-04f_m67_001	GMA	GMA-04f_m67_001.xlsx_m67_RoiSetAuto-13.zip Distance px	20	16235.8	0.138906	1328.73	12.219	1328.73
GMA-04f_m67_001	GMA	GMA-04f_m67_001.xlsx_m67_RoiSetAuto-14.zip Distance px	24	11663.2	0.326204	1328.73	8.77768	1328.73
GMA-04f_m67_001	GMA	GMA-04f_m67_001.xlsx_m67_RoiSetAuto-15.zip Distance px	24	13621.2	0.21495	1328.73	10.2513	1328.73
GMA-04f_m67_001	GMA	GMA-04f_m67_001.xlsx_m67_RoiSetAuto-16.zip Distance px	36	18802.8	0.592903	1328.73	14.1509	1328.73
GMA-04f_m67_001	GMA	GMA-04f_m67_001.xlsx_m67_RoiSetAuto-17.zip Distance px	16	12606.1	0.401508	1328.73	9.4873	1328.73
GMA-04f_m67_001	GMA	GMA-04f_m67_001.xlsx_m67_RoiSetAuto-18.zip Distance px	60	15482.3	0.562492	1328.73	11.6519	1328.73
GMA-04f_m67_001	GMA	GMA-04f_m67_001.xlsx_m67_RoiSetAuto-19.zip Distance px	16	10407.1	0.280399	1328.73	7.83231	1328.73
GMA-04f_m67_001	GMA	GMA-04f_m67_001.xlsx_m67_RoiSetAuto-2.zip Distance px	52	23678.3	0.914103	1328.73	17.8202	1328.73
GMA-04f_m67_001	GMA	GMA-04f_m67_001.xlsx_m67_RoiSetAuto-20.zip Distance px	28	11833.1	0.330601	1328.73	8.90554	1328.73
GMA-04f_m67_001	GMA	GMA-04f_m67_001.xlsx_m67_RoiSetAuto-21.zip Distance px	28	13659.9	0.391358	1328.73	10.2804	1328.73
GMA-04f_m67_001	GMA	GMA-04f_m67_001.xlsx_m67_RoiSetAuto-22.zip Distance px	36	17399.7	0.611373	1328.73	13.095	1328.73
GMA-04f_m67_001	GMA	GMA-04f_m67_001.xlsx_m67_RoiSetAuto-23.zip Distance px	120	16792.8	0.738084	1328.73	12.6382	1328.73
GMA-04f_m67_001	GMA	GMA-04f_m67_001.xlsx_m67_RoiSetAuto-24.zip Distance px	16	11769.5	0.177129	1328.73	8.85769	1328.73
GMA-04f_m67_001	GMA	GMA-04f_m67_001.xlsx_m67_RoiSetAuto-25.zip Distance px	20	12679.7	0.163887	1328.73	9.54268	1328.73
GMA-04f_m67_001	GMA	GMA-04f_m67_001.xlsx_m67_RoiSetAuto-26.zip Distance px	20	11895.1	0.235276	1328.73	8.9522	1328.73
GMA-04f_m67_001	GMA	GMA-04f_m67_001.xlsx_m67_RoiSetAuto-27.zip Distance px	104	15749.7	0.739253	1328.73	11.8532	1328.73
GMA-04f_m67_001	GMA	GMA-04f_m67_001.xlsx_m67_RoiSetAuto-28.zip Distance px	32	13412.7	0.343485	1328.73	10.0943	1328.73
GMA-04f_m67_001	GMA	GMA-04f_m67_001.xlsx_m67_RoiSetAuto-29.zip Distance px	32	13277.1	0.500134	1328.73	9.99229	1328.73
GMA-04f_m67_001	GMA	GMA-04f_m67_001.xlsx_m67_RoiSetAuto-3.zip Distance px	288	27177.2	0.951811	1328.73	20.4534	1328.73
GMA-04f_m67_001	GMA	GMA-04f_m67_001.xlsx_m67_RoiSetAuto-30.zip Distance px	92	21001.5	1.1609	1328.73	15.8057	1328.73
GMA-04f_m67_001	GMA	GMA-04f_m67_001.xlsx_m67_RoiSetAuto-31.zip Distance px	16	11461.7	0.31008	1328.73	8.62599	1328.73
GMA-04f_m67_001	GMA	GMA-04f_m67_001.xlsx_m67_RoiSetAuto-32.zip Distance px	20	12384.5	0.388485	1328.73	9.32052	1328.73
GMA-04f_m67_001	GMA	GMA-04f_m67_001.xlsx_m67_RoiSetAuto-33.zip Distance px	52	18896.2	0.671406	1328.73	14.2212	1328.73
GMA-04f_m67_001	GMA	GMA-04f_m67_001.xlsx_m67_RoiSetAuto-34.zip Distance px	16	12771.4	0.610196	1328.73	9.61167	1328.73
GMA-04f_m67_001	GMA	GMA-04f_m67_001.xlsx_m67_RoiSetAuto-35.zip Distance px	84	18052.7	0.824565	1328.73	13.5864	1328.73
GMA-04f_m67_001	GMA	GMA-04f_m67_001.xlsx_m67_RoiSetAuto-36.zip Distance px	24	14478.1	0.367407	1328.73	10.8962	1328.73
GMA-04f_m67_001	GMA	GMA-04f_m67_001.xlsx_m67_RoiSetAuto-37.zip Distance px	76	21090.4	1.11205	1328.73	15.8726	1328.73
GMA-04f_m67_001	GMA	GMA-04f_m67_001.xlsx_m67_RoiSetAuto-38.zip Distance px	16	10884.2	0.228187	1328.73	8.19142	1328.73
GMA-04f_m67_001	GMA	GMA-04f_m67_001.xlsx_m67_RoiSetAuto-39.zip Distance px	40	14749.4	0.478429	1328.73	11.1003	1328.73
GMA-04f_m67_001	GMA	GMA-04f_m67_001.xlsx_m67_RoiSetAuto-4.zip Distance px	104	15631.4	0.809852	1328.73	11.7641	1328.73
GMA-04f_m67_001	GMA	GMA-04f_m67_001.xlsx_m67_RoiSetAuto-40.zip Distance px	32	15376.3	0.619559	1328.73	11.5721	1328.73
GMA-04f_m67_001	GMA	GMA-04f_m67_001.xlsx_m67_RoiSetAuto-41.zip Distance px	28	16106	0.682676	1328.73	12.1213	1328.73
GMA-04f_m67_001	GMA	GMA-04f_m67_001.xlsx_m67_RoiSetAuto-42.zip Distance px	48	15450.6	0.407092	1328.73	11.6281	1328.73
GMA-04f_m67_001	GMA	GMA-04f_m67_001.xlsx_m67_RoiSetAuto-43.zip Distance px	16	11804.5	0.376075	1328.73	8.88399	1328.73
GMA-04f_m67_001	GMA	GMA-04f_m67_001.xlsx_m67_RoiSetAuto-44.zip Distance px	20	13257.1	0.201172	1328.73	9.97723	1328.73
GMA-04f_m67_001	GMA	GMA-04f_m67_001.xlsx_m67_RoiSetAuto-45.zip Distance px	28	17691.1	0.491245	1328.73	13.3142	1328.73
GMA-04f_m67_001	GMA	GMA-04f_m67_001.xlsx_m67_RoiSetAuto-46.zip Distance px	24	16148	0.61896	1328.73	12.153	1328.73
GMA-04f_m67_001	GMA	GMA-04f_m67_001.xlsx_m67_RoiSetAuto-47.zip Distance px	24	15165.1	0.451952	1328.73	11.4132	1328.73
GMA-04f_m67_001	GMA	GMA-04f_m67_001.xlsx_m67_RoiSetAuto-48.zip Distance px	24	14752.3	0.427885	1328.73	11.1025	1328.73
GMA-04f_m67_001	GMA	GMA-04f_m67_001.xlsx_m67_RoiSetAuto-49.zip Distance px	24	16582.8	0.524271	1328.73	12.4801	1328.73
GMA-04f_m67_001	GMA	GMA-04f_m67_001.xlsx_m67_RoiSetAuto-5.zip Distance px	148	15698	0.73375	1328.73	11.8142	1328.73
GMA-04f_m67_001	GMA	GMA-04f_m67_001.xlsx_m67_RoiSetAuto-6.zip Distance px	172	15843.8	0.798146	1328.73	11.924	1328.73
GMA-04f_m67_001	GMA	GMA-04f_m67_001.xlsx_m67_RoiSetAuto-7.zip Distance px	164	17124.6	0.980139	1328.73	12.8879	1328.73
GMA-04f_m67_001	GMA	GMA-04f_m67_001.xlsx_m67_RoiSetAuto-8.zip Distance px	36	13348.3	0.598709	1328.73	10.0459	1328.73
GMA-04f_m67_001	GMA	GMA-04f_m67_001.xlsx_m67_RoiSetAuto-9.zip Distance px	116	33042.1	1.38632	1328.73	24.8673	1328.73
GMA-04f_m67_002	GMA	GMA-04f_m67_002.xlsx_m67_RoiSetAuto-1.zip Distance px	28	6878.29	0.340946	738.017	9.31996	738.017
GMA-04f_m67_002	GMA	GMA-04f_m67_002.xlsx_m67_RoiSetAuto-10.zip Distance px	80	11523.2	1.41405	738.017	15.6137	738.017
GMA-04f_m67_002	GMA	GMA-04f_m67_002.xlsx_m67_RoiSetAuto-11.zip Distance px	36	11143.1	0.924394	738.017	15.0986	738.017
GMA-04f_m67_002	GMA	GMA-04f_m67_002.xlsx_m67_RoiSetAuto-12.zip Distance px	24	7127.65	0.517183	738.017	9.65784	738.017
GMA-04f_m67_002	GMA	GMA-04f_m67_002.xlsx_m67_RoiSetAuto-13.zip Distance px	16	6881.77	0.456349	738.017	9.32468	738.017
[truncated: 1,147 more rows]

## Sheet: PT-NMJ-LiveFormulae
Revised FN	File	CellArea	Probe-Mean	Probe-CoV	MovieDuration	Duration	Intensity	NormIntRange	Patch/Area	Patch/10um2/min	Pct4-28	Pct32-100	>100			Patches/10um/min
acG-05f_m67_001	acG-05f_m67_001_ Reg.tif	43.6267	1224.81	0.68155	68	40.9778	17923.1	0.559014	1.03148	2.27532	55.5556	37.7778	6.66667			2.27532
acG-05f_m67_002	acG-05f_m67_002_ Reg.tif	125.867	838.043	0.70916	70	46.4842	12294.1	0.640454	0.754767	1.61736	41.0526	54.7368	4.21053			1.61736
acG-05f_m67_003	acG-05f_m67_003_ Reg.tif	125.031	784.093	0.61285	91	45.8551	10562.1	0.553243	0.551863	0.909664	47.8261	47.8261	4.34783			0.909664
acG-06f_m67_001	acG-06f_m67_001_ Reg.tif	118.844	806.146	0.8406	91	55.5349	12080.5	0.644755	0.723635	1.1928	27.907	65.1163	6.97674			1.1928
acG-06f_m67_002	acG-06f_m67_002_ Reg.tif	306.098	926.919	0.68509	91	45.1741	13068.9	0.661424	0.656653	1.08239	36.8159	57.2139	5.97015			1.08239
acR-01f_m67_002	acR-01f_m67_002_ Reg.tif	37.0844	312.902	0.41928	91	48.8571	4576.71	0.723187	1.13255	1.86684	42.8571	52.381	4.7619			1.86684
acR-02f_m67_001	acR-02f_m67_001_ Reg.tif	83.9111	253.669	0.64544	69	45.0323	3466.65	0.7654	0.738877	1.60625	54.8387	33.871	11.2903			1.60625
acR-02f_m67_002	acR-02f_m67_002_ Reg.tif	36.64	300.146	0.53743	69	51.4146	3761.43	0.687326	1.119	2.4326	31.7073	53.6585	14.6341			2.4326
acR-02f_m67_003	acR-02f_m67_003_ Reg.tif	92.32	211.98	0.61795	91	33.8228	3186.65	0.6125	0.855719	1.41053	64.557	32.9114	2.53165			1.41053
acR-03f_m67_003	acR-03f_m67_003_ Reg.tif	67.5556	273.105	0.51613	69	30.9474	3345.03	0.597982	0.5625	1.22283	71.0526	26.3158	2.63158			1.22283
acR-04f_m67_001	acR-04f_m67_001_ Reg.tif	62.6133	378.559	0.63289	69	47.5676	4909.72	0.675251	0.590928	1.28463	40.5405	51.3514	8.10811			1.28463
acR-04f_m67_002	acR-04f_m67_002_ Reg.tif	147.413	291.25	0.67037	69	41.1	3761.78	0.725071	0.542692	1.17976	46.25	50	3.75			1.17976
acR-04f_m67_003	acR-04f_m67_003_ Reg.tif	146.631	302.483	0.63218	69	60.2449	4027.74	0.815781	0.334172	0.726461	30.6122	55.102	14.2857			0.726461
AcR-05f_m67_002	AcR-05f_m67_002_ Reg.tif	41.0133	323.299	0.61243	69	47.3636	3875.87	0.64897	1.07282	2.33222	45.4545	43.1818	11.3636			2.33222
AcR-05f_m67_003	AcR-05f_m67_003_ Reg.tif	141.618	206.804	0.64344	69	36.7213	2414.16	0.709006	0.430737	0.936385	60.6557	34.4262	4.91803			0.936385
FTT-07f_m67_001	FTT-07f_m67_001_ Reg.tif	17.12	418.187	0.39366	59	30.6667	4473.45	0.505623	0.350467	0.891019	66.6667	33.3333	0			0.891019
FTT-07f_m67_002	FTT-07f_m67_002_ Reg.tif	51.6267	432.951	0.62289	91	38.1176	5900.12	0.692143	0.329287	0.542781	52.9412	41.1765	5.88235			0.542781
FTT-07f_m67_003	FTT-07f_m67_003_ Reg.tif	34.0978	562.261	0.51536	91	48.5455	7343.82	0.635645	0.645203	1.06352	45.4545	45.4545	9.09091			1.06352
LiG-01f_m67_002	LiG-01f_m67_002_ Reg.tif	49.1733	273.559	0.72838	91	31.027	3354.91	0.666732	0.75244	1.24029	59.4595	40.5405	0			1.24029
FTT-05x_m67_002	FTT-05x_m67_002_ Reg.tif	68.178	712.968	0.531	45	34.9474	9587.14	0.642716	0.278682	0.928941	42.1053	57.8947	0			0.928941
FTT-06x_m67_001	FTT-06x_m67_001_ Reg.tif	82.596	607.72	0.365	91	47.4286	7883.16	0.578704	0.423749	0.698488	31.4286	65.7143	2.85714			0.698488
FTT-06x_m67_002	FTT-06x_m67_002_ Reg.tif	171.093	434.977	0.586	74	35.4576	5761.64	0.620553	0.344842	0.699003	54.2373	44.0678	1.69492			0.699003
FTT-01x_m67_001	FTT-01x_m67_001_ Reg.tif	26.507	577.614	0.548	91	35.4286	6584.49	0.517831	0.264081	0.435299	57.1429	42.8571	0			0.435299
FTT-01x_m67_002	FTT-01x_m67_002_ Reg.tif	174.364	611.023	0.472	71	33.25	8563.98	0.549414	0.0917621	0.193864	87.5	0	12.5			0.193864
LiG-03f_m67_001	LiG-03f_m67_001_ Reg.tif	38.4533	299.266	0.70705	91	49.2	3526.66	0.734864	0.520111	0.857326	55	30	15
LiG-03f_m67_002	LiG-03f_m67_002_ Reg.tif	135.289	165.048	0.73055	91	42.1667	2264.48	0.796584	0.532194	0.877244	54.1667	40.2778	5.55556
LiG-03f_m67_003	LiG-03f_m67_003_ Reg.tif	80.6044	296.678	0.71472	91	59.7895	4818.46	0.908775	0.235719	0.388548	31.5789	52.6316	15.7895
LiG-04f_m67_001	LiG-04f_m67_001_ Reg.tif	56.8711	404.647	0.56327	91	42.6977	5373.58	0.669497	0.756096	1.24631	48.8372	44.186	6.97674
LiG-04f_m67_002	LiG-04f_m67_002_ Reg.tif	33.0489	227.236	0.66865	76	50.5333	3261.57	0.802121	0.907746	1.7916	46.6667	36.6667	16.6667
LiG-02f_m67_001	LiG-02f_m67_001_ Reg.tif	51.2889	153.099	0.53297	91	33.1	1891.2	0.763468	0.779896	1.28554	62.5	35	2.5
LiG-02f_m67_002	LiG-02f_m67_002_ Reg.tif	78.7733	186.472	0.53732	91	34.3371	2025.34	0.67392	1.12982	1.86235	60.6742	35.9551	3.37079
LiR-02f_m67_001	LiR-02f_m67_001_ Reg.tif	201.6	529.942	0.65823	91	44.1758	6941.26	0.609567	0.451389	0.744048	45.0549	46.1538	8.79121
LiR-02f_m67_002	LiR-02f_m67_002_ Reg.tif	74.0089	463.968	0.60976	91	63.8033	5717.92	0.640852	0.824225	1.35861	45.9016	37.7049	16.3934
LiR-02f_m67_003	LiR-02f_m67_003_ Reg.tif	82.3644	697.894	0.67062	91	66.4211	10580.9	0.693161	0.461364	0.76049	28.9474	57.8947	13.1579
LiR-03f_m67_001	LiR-03f_m67_001_ Reg.tif	41.8667	515.149	0.62891	91	66.1667	6652.18	0.642653	0.573248	0.944915	16.6667	66.6667	16.6667
LiR-03f_m67_002	LiR-03f_m67_002_ Reg.tif	67.04	740.961	0.54745	91	48	10010.7	0.586271	0.611575	1.00809	58.5366	34.1463	7.31707
LiR-03f_m67_003	LiR-03f_m67_003_ Reg.tif	54.56	680.161	0.86848	91	62.1695	10510.7	0.71471	1.08138	1.78249	38.9831	49.1525	11.8644
LiR-04f_m67_001	LiR-04f_m67_001_ Reg.tif	78.0089	430.811	0.56164	91	59.6735	5150.46	0.618709	0.628134	1.03538	28.5714	55.102	16.3265
GMA-01f_m67_002	GMA-01f_m67_002_Reg.tif	58.187	951.747	0.614	91	48.9412	13510.7	0.701601	0.876484	1.44475	41.1765	43.1373	15.6863
GMA-01f_m67_003	GMA-01f_m67_003_Reg.tif	154.667	613.194	0.532	91	42.5833	8501.27	0.716938	0.620688	1.02311	51.0417	44.7917	4.16667
GMA-03f_m67_001	GMA-03f_m67_001_Reg.tif	44.48	651.102	0.659	91	35.4737	8076.74	0.571432	0.854317	1.40821	71.0526	21.0526	7.89474
GMA-03f_m67_002	GMA-03f_m67_002_Reg.tif	132.551	1163.02	0.65	91	50.9474	17021.2	0.656821	0.716705	1.18138	38.9474	50.5263	10.5263
GMA-03f_m67_003	GMA-03f_m67_003_Reg.tif	66.631	459.021	0.577	91	49.3333	6869.49	0.763149	0.765409	1.26166	41.1765	49.0196	9.80392
GMA-04f_m67_001	GMA-04f_m67_001_Reg.tif	79.218	1328.73	0.646	91	55.7551	15782.6	0.565406	0.618546	1.01958	48.9796	30.6122	20.4082
GMA-04f_m67_002	GMA-04f_m67_002_Reg.tif	46.062	738.017	0.517	91	42.875	9030.94	0.690426	0.694716	1.14514	40.625	56.25	3.125
GMA-04f_m67_003	GMA-04f_m67_003_Reg.tif	53.689	715.054	0.508	91	47.2222	9612.38	0.619278	0.670528	1.10527	44.4444	47.2222	8.33333
GMA-05f_m67_001	GMA-05f_m67_001_Reg.tif	42.116	495.025	0.507	91	62.1714	6463.6	0.680726	0.831038	1.36984	34.2857	57.1429	8.57143
GMA-05f_m67_002	GMA-05f_m67_002_Reg.tif	90.08	824.144	0.509	91	43.125	10065.8	0.607982	0.71048	1.17112	51.5625	40.625	7.8125
GMA-05f_m67_003	GMA-05f_m67_003_Reg.tif	36.124	401.682	0.576	91	44.3871	5402.47	0.629311	0.858155	1.41454	54.8387	35.4839	9.67742
GMA-06f_m67_001	GMA-06f_m67_001_Reg.tif	236.729	524.458	0.595	91	62.4615	6230.1	0.726104	0.329491	0.543117	19.2308	67.9487	12.8205
GMA-06f_m67_003	GMA-06f_m67_003_Reg.tif	139.716	319.731	0.66	91	45.863	4557.64	0.797732	0.522488	0.861245	42.4658	50.6849	6.84932
GMA-07f_m67_001	GMA-07f_m67_001_Reg.tif	60.587	285.179	0.541	91	43.661	3492.25	0.72638	0.973806	1.60518	47.4576	45.7627	6.77966
GMA-07f_m67_003	GMA-07f_m67_003_Reg.tif	62.329	728.797	0.503	91	37.0323	9751.11	0.535457	0.497361	0.819825	54.8387	41.9355	3.22581
AcG-01x_m67_002	AcG-01x_m67_002x_ Reg.tif	210.436	1311.51	0.776	91	45.2784	19835.7	0.624242	0.460948	0.759804	32.9897	63.9175	3.09278
AcG-02x_m67_001	AcG-02x_m67_001x_ Reg.tif	89.173	1255.79	0.561	71	61.9178	18057.7	0.62678	0.818633	1.72951	24.6575	60.274	15.0685
AcG-02x_m67_002	AcG-02x_m67_002x_ Reg.tif	100.587	956.908	0.721	91	71.4839	14227.6	0.709548	0.616382	1.01601	33.871	40.3226	25.8065
AcG-03x_m67_002	AcG-03x_m67_002x_ Reg.tif	81.707	1344.66	0.687	91	49.3548	18164.5	0.552095	0.758809	1.25078	54.8387	35.4839	9.67742
FTT-03x_m67_001	FTT-03x_m67_001x_ Reg.tif	49.76	778.334	0.551	91	47.2857	9544.38	0.517724	0.562701	0.927529	46.4286	46.4286	7.14286
FTT-04x_m67_001	FTT-04x_m67_001x_ Reg.tif	46.418	617.696	0.509	76	47.619	7248.82	0.541295	0.452411	0.892916	61.9048	28.5714	9.52381
FTT-04x_m67_002	FTT-04x_m67_002x_ Reg.tif	72.658	706.879	0.385	91	35.7143	8426.29	0.51274	0.385367	0.63522	46.4286	53.5714	0
FTT-05x_m67_002	FTT-05x_m67_002x_ Reg.tif	68.178	712.968	0.531	45	34.9474	9587.14	0.642716	0.278682	0.928941	42.1053	57.8947	0
FTT-06x_m67_001	FTT-06x_m67_001x_ Reg.tif	82.596	607.72	0.365	91	47.4286	7883.16	0.578704	0.423749	0.698488	31.4286	65.7143	2.85714
FTT-06x_m67_002	FTT-06x_m67_002x_ Reg.tif	171.093	434.977	0.586	74	35.4576	5761.64	0.620553	0.344842	0.699003	54.2373	44.0678	1.69492
FTT-01x_m67_001	FTT-01x_m67_001x_ Reg.tif	26.507	577.614	0.548	91	35.4286	6584.49	0.517831	0.264081	0.435299	57.1429	42.8571	0
FTT-01x_m67_002	FTT-01x_m67_002x_ Reg.tif	174.364	611.023	0.472	71	33.25	8563.98	0.549414	0.0917621	0.193864	87.5	0	12.5

## Sheet: PT-NMJ-Values
							1049.87	285.42	587.807	679.927	250.751	579.841		0.697139	0.592754	0.498807	0.572933	0.647864	0.649299		51.3401	44.3072	38.8108	47.4555	42.8564	58.63		14.4155	13.0969	12.7165	13.2068	13.1071	13.4879		0.619062	0.696047	0.576476	0.665916	0.751995	0.643703		0.70813	0.737999	0.345729	0.702681	0.701753	0.661616		1.31485
Revised FN	Revised FN	Revised FN	Revised FN	Revised FN	Revised FN		Probe-Mean	Probe-Mean	Probe-Mean	Probe-Mean	Probe-Mean	Probe-Mean		Probe-CoV	Probe-CoV	Probe-CoV	Probe-CoV	Probe-CoV	Probe-CoV		Duration	Duration	Duration	Duration	Duration	Duration		NormPatchIntensity	NormPatchIntensity	NormPatchIntensity	NormPatchIntensity	NormPatchIntensity	NormPatchIntensity		NormIntRange	NormIntRange	NormIntRange	NormIntRange	NormIntRange	NormIntRange		Patch/Area	Patch/Area	Patch/Area	Patch/Area	Patch/Area	Patch/Area		Patch/10um2/min
AcG	AcR	FTT	GMA	LiG	LiR		AcG	AcR	FTT	GMA	LiG	LiR		AcG	AcR	FTT	GMA	LiG	LiR		AcG	AcR	FTT	GMA	LiG	LiR		AcG	AcR	FTT	GMA	LiG	LiR		AcG	AcR	FTT	GMA	LiG	LiR		AcG	AcR	FTT	GMA	LiG	LiR		AcG
AcG-01x_m67_002	acR-01f_m67_002	FTT-01x_m67_001	GMA-01f_m67_002	LiG-01f_m67_002	LiR-02f_m67_001		1311.51	312.902	577.614	951.747	273.559	529.942		0.776	0.41928	0.548	0.614	0.72838	0.65823		45.2784	48.8571	35.4286	48.9412	31.027	44.1758		15.1243	14.6267	11.3995	14.1957	12.264	13.0982		0.624242	0.723187	0.517831	0.701601	0.666732	0.609567		0.460948	1.13255	0.264081	0.876484	0.75244	0.451389		0.759804
AcG-02x_m67_001	acR-02f_m67_001	FTT-01x_m67_001	GMA-01f_m67_003	LiG-02f_m67_001	LiR-02f_m67_002		1255.79	253.669	577.614	613.194	153.099	463.968		0.561	0.64544	0.548	0.532	0.53297	0.60976		61.9178	45.0323	35.4286	42.5833	33.1	63.8033		14.3795	13.666	11.3995	13.8639	12.3528	12.3239		0.62678	0.7654	0.517831	0.716938	0.763468	0.640852		0.818633	0.738877	0.264081	0.620688	0.779896	0.824225		1.72951
AcG-02x_m67_002	acR-02f_m67_002	FTT-01x_m67_002	GMA-03f_m67_001	LiG-02f_m67_002	LiR-02f_m67_003		956.908	300.146	611.023	651.102	186.472	697.894		0.721	0.53743	0.472	0.659	0.53732	0.67062		71.4839	51.4146	33.25	35.4737	34.3371	66.4211		14.8683	12.532	14.0158	12.4047	10.8613	15.1612		0.709548	0.687326	0.549414	0.571432	0.67392	0.693161		0.616382	1.119	0.0917621	0.854317	1.12982	0.461364		1.01601
AcG-03x_m67_002	acR-02f_m67_003	FTT-01x_m67_002	GMA-03f_m67_002	LiG-03f_m67_001	LiR-03f_m67_001		1344.66	211.98	611.023	1163.02	299.266	515.149		0.687	0.61795	0.472	0.65	0.70705	0.62891		49.3548	33.8228	33.25	50.9474	49.2	66.1667		13.5087	15.0328	14.0158	14.6353	11.7844	12.9131		0.552095	0.6125	0.549414	0.656821	0.734864	0.642653		0.758809	0.855719	0.0917621	0.716705	0.520111	0.573248		1.25078
acG-05f_m67_001	acR-03f_m67_003	FTT-03x_m67_001	GMA-03f_m67_003	LiG-03f_m67_002	LiR-03f_m67_002		1224.81	273.105	778.334	459.021	165.048	740.961		0.68155	0.51613	0.551	0.577	0.73055	0.54745		40.9778	30.9474	47.2857	49.3333	42.1667	48		14.6334	12.2481	12.2626	14.9655	13.7201	13.5104		0.559014	0.597982	0.517724	0.763149	0.796584	0.586271		1.03148	0.5625	0.562701	0.765409	0.532194	0.611575		2.27532
acG-05f_m67_002	acR-04f_m67_001	FTT-04x_m67_001	GMA-04f_m67_001	LiG-03f_m67_003	LiR-03f_m67_003		838.043	378.559	617.696	1328.73	296.678	680.161		0.70916	0.63289	0.509	0.646	0.71472	0.86848		46.4842	47.5676	47.619	55.7551	59.7895	62.1695		14.67	12.9695	11.7352	11.8779	16.2414	15.4533		0.640454	0.675251	0.541295	0.565406	0.908775	0.71471		0.754767	0.590928	0.452411	0.618546	0.235719	1.08138		1.61736
acG-05f_m67_003	acR-04f_m67_002	FTT-04x_m67_002	GMA-04f_m67_002	LiG-04f_m67_001	LiR-04f_m67_001		784.093	291.25	706.879	738.017	404.647	430.811		0.61285	0.67037	0.385	0.517	0.56327	0.56164		45.8551	41.1	35.7143	42.875	42.6977	59.6735		13.4705	12.916	11.9204	12.2368	13.2797	11.9553		0.553243	0.725071	0.51274	0.690426	0.669497	0.618709		0.551863	0.542692	0.385367	0.694716	0.756096	0.628134		0.909664
acG-06f_m67_001	acR-04f_m67_003	FTT-05x_m67_002	GMA-04f_m67_003	LiG-04f_m67_002			806.146	302.483	712.968	715.054	227.236			0.8406	0.63218	0.531	0.508	0.66865			55.5349	60.2449	34.9474	47.2222	50.5333			14.9855	13.3156	13.4468	13.4429	14.3532			0.644755	0.815781	0.642716	0.619278	0.802121			0.723635	0.334172	0.278682	0.670528	0.907746			1.1928
acG-06f_m67_002	AcR-05f_m67_002	FTT-05x_m67_002	GMA-05f_m67_001				926.919	323.299	712.968	495.025				0.68509	0.61243	0.531	0.507				45.1741	47.3636	34.9474	62.1714				14.0993	11.9885	13.4468	13.0571				0.661424	0.64897	0.642716	0.680726				0.656653	1.07282	0.278682	0.831038				1.08239
	AcR-05f_m67_003	FTT-06x_m67_001	GMA-05f_m67_002					206.804	607.72	824.144					0.64344	0.365	0.509					36.7213	47.4286	43.125					11.6737	12.9717	12.2136					0.709006	0.578704	0.607982					0.430737	0.423749	0.71048
		FTT-06x_m67_001	GMA-05f_m67_003						607.72	401.682						0.365	0.576						47.4286	44.3871						12.9717	13.4496						0.578704	0.629311						0.423749	0.858155
		FTT-06x_m67_002	GMA-06f_m67_001						434.977	524.458						0.586	0.595						35.4576	62.4615						13.2458	11.8791						0.620553	0.726104						0.344842	0.329491
		FTT-06x_m67_002	GMA-06f_m67_003						434.977	319.731						0.586	0.66						35.4576	45.863						13.2458	14.2546						0.620553	0.797732						0.344842	0.522488
		FTT-07f_m67_001	GMA-07f_m67_001						418.187	285.179						0.39366	0.541						30.6667	43.661						10.6973	12.2458						0.505623	0.72638						0.350467	0.973806
		FTT-07f_m67_002	GMA-07f_m67_003						432.951	728.797						0.62289	0.503						38.1176	37.0323						13.6277	13.3797						0.692143	0.535457						0.329287	0.497361
		FTT-07f_m67_003							562.261							0.51536							48.5455							13.0612							0.635645							0.645203
[truncated: 23 more columns]

## Sheet: PooledPTDataValues
							50.0316	43.3846	40.3876	48.044	40.1029	56.7052		0.623105	0.697724	0.583329	0.679248	0.735305	0.641455		14.3985	13.1963	12.7977	13.3058	12.7094	13.4469
NMJ	NMJ	NMJ	NMJ	NMJ	NMJ		Duration	Duration	Duration	Duration	Duration	Duration		NormIntensityRange	NormIntensityRange	NormIntensityRange	NormIntensityRange	NormIntensityRange	NormIntensityRange		NormPatchInt	NormPatchInt	NormPatchInt	NormPatchInt	NormPatchInt	NormPatchInt
AcG	AcR	FTT	GMA	LiG	LiR		AcG	AcR	FTT	GMA	LiG	LiR		AcG	AcR	FTT	GMA	LiG	LiR		AcG	AcR	FTT	GMA	LiG	LiR
AcG-01x_m67_002	acR-01f_m67_002	FTT-01x_m67_001	GMA-01f_m67_002	LiG-01f_m67_002	LiR-02f_m67_001		44	48	36	24	40	32		0.489735	0.68795	0.871779	0.281289	0.571056	0.617757		13.5402	12.5352	12.1387	21.921	11.6234	9.56751
AcG-01x_m67_002	acR-01f_m67_002	FTT-01x_m67_001	GMA-01f_m67_002	LiG-01f_m67_002	LiR-02f_m67_001		36	28	16	44	96	44		0.924834	0.579696	0.213345	0.555209	1.35066	0.442547		13.8787	10.7503	9.35477	13.8353	18.7892	15.4962
AcG-01x_m67_002	acR-01f_m67_002	FTT-01x_m67_001	GMA-01f_m67_002	LiG-01f_m67_002	LiR-02f_m67_001		56	72	24	44	20	40		0.479912	0.620864	0.418747	0.607835	0.571494	0.417207		18.7759	17.4521	8.50249	16.3359	9.96011	13.3068
AcG-01x_m67_002	acR-01f_m67_002	FTT-01x_m67_001	GMA-01f_m67_002	LiG-01f_m67_002	LiR-02f_m67_001		24	16	16	60	68	16		0.204689	0.3074	0.273301	1.05201	0.763606	0.0911414		14.4201	9.94153	6.40676	16.6645	21.3061	11.936
AcG-01x_m67_002	acR-01f_m67_002	FTT-01x_m67_001	GMA-01f_m67_002	LiG-01f_m67_002	LiR-02f_m67_001		36	208	84	24	48	20		0.389565	1.20444	0.791372	0.536429	0.875266	0.496307		16.1317	16.0286	14.7909	9.16974	14.6586	11.9326
AcG-01x_m67_002	acR-01f_m67_002	FTT-01x_m67_001	GMA-01f_m67_002	LiG-01f_m67_002	LiR-02f_m67_001		36	16	44	32	32	16		0.622948	0.697699	0.668424	0.563854	0.723163	0.544198		20.5438	12.1566	12.2303	9.53555	11.1301	10.7238
AcG-01x_m67_002	acR-01f_m67_002	FTT-01x_m67_001	GMA-01f_m67_002	LiG-01f_m67_002	LiR-02f_m67_001		48	20	28	32	20	24		0.490411	0.534608	0.38785	1.00369	1.12366	0.461145		17.4234	8.36453	16.3724	14.0124	13.6899	12.4113
AcG-01x_m67_002	acR-01f_m67_002	FTT-01x_m67_002	GMA-01f_m67_002	LiG-01f_m67_002	LiR-02f_m67_001		24	40	20	28	24	20		0.108056	0.584419	0.375947	0.386756	0.419766	0.434147		13.6437	12.4413	14.4083	9.20877	11.7497	12.3264
AcG-01x_m67_002	acR-01f_m67_002	FTT-01x_m67_002	GMA-01f_m67_002	LiG-01f_m67_002	LiR-02f_m67_001		28	60	28	36	32	24		0.46311	0.481399	0.5363	0.76342	1.08249	0.208196		15.488	20.7839	11.2939	14.06	9.52276	12.1268
AcG-01x_m67_002	acR-01f_m67_002	FTT-01x_m67_002	GMA-01f_m67_002	LiG-01f_m67_002	LiR-02f_m67_001		24	20	20	44	32	28		0.420649	0.283476	0.440226	0.876143	0.381089	0.772367		14.6715	9.54456	10.7659	10.2651	8.62773	15.7466
AcG-01x_m67_002	acR-01f_m67_002	FTT-01x_m67_002	GMA-01f_m67_002	LiG-01f_m67_002	LiR-02f_m67_001		48	168	24	32	72	28		0.463916	1.32697	0.331612	0.56284	0.707784	0.229535		18.0588	20.1227	11.2072	13.276	22.4676	14.3338
AcG-01x_m67_002	acR-01f_m67_002	FTT-01x_m67_002	GMA-01f_m67_002	LiG-01f_m67_002	LiR-02f_m67_001		56	40	108	124	20	20		0.93063	0.752712	1.16777	1.12529	0.743064	0.163756		13.2489	17.7353	14.8716	18.7358	9.16853	11.7129
AcG-01x_m67_002	acR-01f_m67_002	FTT-01x_m67_002	GMA-01f_m67_002	LiG-01f_m67_002	LiR-02f_m67_001		64	88	16	208	28	20		0.932424	1.07111	0.904891	1.37889	0.582008	0.310563		14.3034	16.2884	8.3968	14.2715	11.1049	15.56
AcG-01x_m67_002	acR-01f_m67_002	FTT-01x_m67_002	GMA-01f_m67_002	LiG-01f_m67_002	LiR-02f_m67_001		60	24	20	16	16	16		0.934309	0.752139	0.415877	0.298441	0.350485	0.521306		17.8045	9.83126	10.0722	10.7383	9.77812	9.92136
AcG-01x_m67_002	acR-01f_m67_002	FTT-01x_m67_002	GMA-01f_m67_002	LiG-01f_m67_002	LiR-02f_m67_001		36	76	120	104	48	16		0.2852	1.22778	1.10774	0.848117	1.18206	0.453165		10.7134	18.3008	20.9542	17.4181	13.3029	10.7911
AcG-01x_m67_002	acR-01f_m67_002	FTT-01x_m67_002	GMA-01f_m67_002	LiG-01f_m67_002	LiR-02f_m67_001		228	16	16	108	20	48		1.12638	0.454983	0.12107	1.30879	0.531379	0.717882		18.268	10.9263	10.669	18.6298	11.1092	9.36738
AcG-01x_m67_002	acR-01f_m67_002	FTT-01x_m67_002	GMA-01f_m67_002	LiG-01f_m67_002	LiR-02f_m67_001		72	56	24	108	36	88		0.966428	1.22503	0.82298	1.17226	0.766895	0.973588		15.6435	20.6523	13.9009	16.4338	12.9701	15.8653
AcG-01x_m67_002	acR-01f_m67_002	FTT-01x_m67_002	GMA-01f_m67_002	LiG-01f_m67_002	LiR-02f_m67_001		36	60	24	32	32	24		0.380928	0.644537	0.41264	0.346177	0.7653	0.600827		10.8923	13.9704	16.1986	11.3448	6.90476	9.90326
AcG-01x_m67_002	acR-01f_m67_002	FTT-01x_m67_002	GMA-01f_m67_002	LiG-01f_m67_002	LiR-02f_m67_001		48	44	20	52	16	16		1.25751	1.14465	0.449144	0.685451	0.16647	0.218531		16.3759	12.9159	17.8183	14.3169	10.1909	11.8355
AcG-01x_m67_002	acR-01f_m67_002	FTT-01x_m67_002	GMA-01f_m67_002	LiG-01f_m67_002	LiR-02f_m67_001		24	16	28	136	16	20		0.428652	0.677761	0.543872	1.1179	0.345756	0.595778		10.903	8.32709	19.1484	16.3503	10.3609	11.1553
AcG-01x_m67_002	acR-01f_m67_002	FTT-01x_m67_002	GMA-01f_m67_002	LiG-01f_m67_002	LiR-02f_m67_001		64	24	24	68	20	24		1.26153	0.651362	0.24029	1.04634	0.437042	0.63323		24.6761	10.1832	19.2625	17.3435	12.5576	8.54439
AcG-01x_m67_002	acR-01f_m67_002	FTT-01x_m67_002	GMA-01f_m67_002	LiG-01f_m67_002	LiR-02f_m67_001		160	40	20	48	16	104		1.57605	0.613864	0.664583	0.582088	0.391991	1.21779		22.9861	13.5244	15.712	10.0076	9.406	14.0396
AcG-01x_m67_002	acR-01f_m67_002	FTT-01x_m67_002	GMA-01f_m67_002	LiG-01f_m67_002	LiR-02f_m67_001		40	16	20	60	40	64		0.489567	0.671885	0.255691	1.1787	1.24835	1.47318		9.72692	11.9437	9.57324	16.0016	14.1733	24.4111
AcG-01x_m67_002	acR-01f_m67_002	FTT-03x_m67_001	GMA-01f_m67_002	LiG-01f_m67_002	LiR-02f_m67_001		96	40	44	24	16	36		0.939119	1.08346	0.375688	0.81285	0.483591	0.419822		19.1674	13.8145	11.5976	13.6288	10.8839	9.77933
AcG-01x_m67_002	acR-01f_m67_002	FTT-03x_m67_001	GMA-01f_m67_002	LiG-01f_m67_002	LiR-02f_m67_001		72	20	16	80	24	16		0.858681	0.384413	0.399818	0.887333	0.785479	0.345158		18.9921	12.8707	9.15754	17.0718	12.9803	8.80843
AcG-01x_m67_002	acR-01f_m67_002	FTT-03x_m67_001	GMA-01f_m67_002	LiG-01f_m67_002	LiR-02f_m67_001		20	76	56	52	16	44		0.578494	0.906553	0.593223	0.857086	0.428969	0.776839		12.5375	12.0584	13.4641	12.2574	11.1458	15.0613
AcG-01x_m67_002	acR-01f_m67_002	FTT-03x_m67_001	GMA-01f_m67_002	LiG-01f_m67_002	LiR-02f_m67_001		20	28	16	20	20	44		0.405488	0.306792	0.141007	0.360093	0.456666	0.685853		10.2175	10.7106	8.64178	10.5689	10.8294	11.4028
AcG-01x_m67_002	acR-01f_m67_002	FTT-03x_m67_001	GMA-01f_m67_002	LiG-01f_m67_002	LiR-02f_m67_001		128	52	64	16	20	44		1.305	0.82369	0.650015	0.462545	0.299173	0.538162		25.7625	12.5319	14.0082	11.7478	10.59	11.8182
AcG-01x_m67_002	acR-01f_m67_002	FTT-03x_m67_001	GMA-01f_m67_002	LiG-01f_m67_002	LiR-02f_m67_001		32	84	56	16	36	88		0.60582	0.339397	0.570027	0.159927	0.783769	0.501568		12.7503	62.7819	12.5714	11.3924	12.2829	11.7001
AcG-01x_m67_002	acR-01f_m67_002	FTT-03x_m67_001	GMA-01f_m67_002	LiG-01f_m67_002	LiR-02f_m67_001		24	64	124	32	28	108		0.371351	0.80472	0.924543	0.696415	0.874389	0.813388		9.39221	13.4749	12.5381	12.5196	12.7215	19.9502
AcG-01x_m67_002	acR-01f_m67_002	FTT-03x_m67_001	GMA-01f_m67_002	LiG-01f_m67_002	LiR-02f_m67_001		32	64	16	28	24	52		1.48402	1.32355	0.418293	0.408829	0.485354	1.22716		15.5128	13.1169	10.2017	11.5023	8.0599	18.4414
AcG-01x_m67_002	acR-01f_m67_002	FTT-03x_m67_001	GMA-01f_m67_002	LiG-01f_m67_002	LiR-02f_m67_001		16	16	60	16	20	32		0.19219	0.388498	0.67583	0.392461	0.49756	0.509818		10.3366	10.0965	11.0835	9.73377	12.7204	13.1585
AcG-01x_m67_002	acR-01f_m67_002	FTT-03x_m67_001	GMA-01f_m67_002	LiG-01f_m67_002	LiR-02f_m67_001		16	48	24	104	16	36		0.470434	0.763961	0.440166	1.15885	0.587839	1.00915		9.48432	14.0099	9.99708	12.8065	9.34236	11.1516
AcG-01x_m67_002	acR-01f_m67_002	FTT-03x_m67_001	GMA-01f_m67_002	LiG-01f_m67_002	LiR-02f_m67_001		32	20	48	16	16	40		0.516392	0.464123	0.620444	0.342651	0.421366	0.655194		14.7499	11.8796	12.3858	11.7836	11.4435	11.0341
AcG-01x_m67_002	acR-01f_m67_002	FTT-03x_m67_001	GMA-01f_m67_002	LiG-01f_m67_002	LiR-02f_m67_001		36	16	20	16	32	128		0.632786	0.69196	0.301136	0.0509863	0.75711	1.10136		12.0927	11.6709	11.0491	11.4769	19.3376	15.2251
AcG-01x_m67_002	acR-01f_m67_002	FTT-03x_m67_001	GMA-01f_m67_002	LiG-01f_m67_002	LiR-02f_m67_001		16	24	40	16	64	96		0.282745	0.325091	0.548914	0.268212	0.951825	0.556588		10.7909	15.4876	12.333	9.83566	13.4084	11.4145
AcG-01x_m67_002	acR-01f_m67_002	FTT-03x_m67_001	GMA-01f_m67_002	LiG-01f_m67_002	LiR-02f_m67_001		16	16	20	28	24	16		0.0767853	0.36383	0.415639	0.323486	0.775163	0.451106		9.51551	17.0169	10.5946	14.3811	13.468	12.1783
AcG-01x_m67_002	acR-01f_m67_002	FTT-03x_m67_001	GMA-01f_m67_002	LiG-02f_m67_001	LiR-02f_m67_001		32	40	20	52	28	124		0.849169	0.440707	0.411643	0.745301	1.1989	1.16168		13.5493	13.585	11.0423	13.5748	13.6899	15.4678
AcG-01x_m67_002	acR-01f_m67_002	FTT-03x_m67_001	GMA-01f_m67_002	LiG-02f_m67_001	LiR-02f_m67_001		28	36	72	48	32	156		0.35646	0.659077	0.722206	0.68297	0.700399	1.32159		11.0241	13.236	13.7796	16.0565	9.88484	16.4243
AcG-01x_m67_002	acR-01f_m67_002	FTT-03x_m67_001	GMA-01f_m67_002	LiG-02f_m67_001	LiR-02f_m67_001		88	92	40	36	32	84		0.91587	0.878968	0.531617	0.619992	0.638639	0.791129		19.1712	14.4386	15.5837	18.1717	13.0269	13.9916
AcG-01x_m67_002	acR-01f_m67_002	FTT-03x_m67_001	GMA-01f_m67_002	LiG-02f_m67_001	LiR-02f_m67_001		24	96	20	24	24	28		0.366008	0.9551	0.422263	0.759156	0.651118	0.620258		10.8279	15.3042	12.385	16.6264	12.1678	10.3448
AcG-01x_m67_002	acR-01f_m67_002	FTT-03x_m67_001	GMA-01f_m67_002	LiG-02f_m67_001	LiR-02f_m67_001		76	24	28	24	40	36		0.579969	1.27324	0.263822	0.677392	1.03666	0.295793		13.1824	11.5151	12.8914	13.2731	12.4004	11.2009
AcG-01x_m67_002	acR-02f_m67_001	FTT-03x_m67_001	GMA-01f_m67_002	LiG-02f_m67_001	LiR-02f_m67_001		16	96	84	28	24	60		0.291169	0.721506	0.544162	0.346629	0.483416	0.529669		9.60611	15.1495	12.1886	11.9172	15.5487	12.252
AcG-01x_m67_002	acR-02f_m67_001	FTT-03x_m67_001	GMA-01f_m67_002	LiG-02f_m67_001	LiR-02f_m67_001		24	236	52	40	20	40		0.0757839	1.19486	0.535852	0.518559	0.498967	0.626809		13.6108	19.4585	16.8134	12.8718	13.1305	9.60836
AcG-01x_m67_002	acR-02f_m67_001	FTT-03x_m67_001	GMA-01f_m67_002	LiG-02f_m67_001	LiR-02f_m67_001		36	108	48	40	76	140		0.493041	0.985308	0.250061	0.817567	1.14414	1.27433		10.7351	10.5207	15.5348	17.2796	15.5828	20.1584
AcG-01x_m67_002	acR-02f_m67_001	FTT-03x_m67_001	GMA-01f_m67_002	LiG-02f_m67_001	LiR-02f_m67_001		16	16	24	28	32	52		0.364082	0.34736	0.419806	0.90527	0.595773	0.516239		9.24856	10.0826	13.974	15.2541	10.9656	14.2526
AcG-01x_m67_002	acR-02f_m67_001	FTT-03x_m67_001	GMA-01f_m67_002	LiG-02f_m67_001	LiR-02f_m67_001		68	20	16	16	88	36		0.829318	0.460228	0.230165	0.501703	1.41024	0.403055		14.8623	10.6126	10.2817	15.7434	11.9319	10.0881
AcG-01x_m67_002	acR-02f_m67_001	FTT-03x_m67_001	GMA-01f_m67_002	LiG-02f_m67_001	LiR-02f_m67_001		52	16	60	32	60	52		1.25387	0.299162	0.838905	0.953769	0.961672	0.77271		20.5763	11.6516	11.4817	18.075	13.6709	12.1583
AcG-01x_m67_002	acR-02f_m67_001	FTT-03x_m67_001	GMA-01f_m67_002	LiG-02f_m67_001	LiR-02f_m67_001		40	20	28	160	112	80		0.488441	0.282005	0.576992	1.62814	0.876368	0.734408		16.8136	10.5119	11.0593	21.6229	12.1669	14.509
AcG-01x_m67_002	acR-02f_m67_001	FTT-03x_m67_001	GMA-01f_m67_002	LiG-02f_m67_001	LiR-02f_m67_001		64	20	208	16	28	92		0.594404	1.29059	1.17992	0.364258	1.15861	1.21798		15.2272	10.9003	16.5914	19.9307	12.5889	22.5192
AcG-01x_m67_002	acR-02f_m67_001	FTT-03x_m67_001	GMA-01f_m67_002	LiG-02f_m67_001	LiR-02f_m67_001		20	48	20	24	24	16		0.164768	0.913203	0.49413	0.801285	0.615859	0.373949		11.1946	11.0492	10.1213	12.9994	12.298	10.3081
AcG-01x_m67_002	acR-02f_m67_001	FTT-04x_m67_001	GMA-01f_m67_003	LiG-02f_m67_001	LiR-02f_m67_001		24	36	76	52	56	16		0.432255	0.905743	1.08105	0.899874	1.26344	0.538837		13.3996	13.0784	12.1582	19.3921	17.8745	9.19337
AcG-01x_m67_002	acR-02f_m67_001	FTT-04x_m67_001	GMA-01f_m67_003	LiG-02f_m67_001	LiR-02f_m67_001		16	24	16	20	16	20		0.306245	0.42781	0.167808	0.762864	0.425482	0.55867		9.88604	9.56126	9.17149	11.5079	10.9064	12.7542
AcG-01x_m67_002	acR-02f_m67_001	FTT-04x_m67_001	GMA-01f_m67_003	LiG-02f_m67_001	LiR-02f_m67_001		44	48	32	20	28	32		0.644977	0.882675	0.895857	0.28768	0.775428	0.51563		14.3969	12.9829	9.91833	12.3065	11.5165	11.099
AcG-01x_m67_002	acR-02f_m67_001	FTT-04x_m67_001	GMA-01f_m67_003	LiG-02f_m67_001	LiR-02f_m67_001		36	36	72	52	20	36		0.698229	0.663524	0.912236	0.84635	0.439738	0.566751		17.614	10.8125	14.3371	13.642	8.81502	13.4164
AcG-01x_m67_002	acR-02f_m67_001	FTT-04x_m67_001	GMA-01f_m67_003	LiG-02f_m67_001	LiR-02f_m67_001		32	16	104	96	52	40		0.750831	0.405532	0.673228	0.854656	1.01626	0.918075		15.2997	8.44994	14.0433	22.6732	13.1685	15.5482
AcG-01x_m67_002	acR-02f_m67_001	FTT-04x_m67_001	GMA-01f_m67_003	LiG-02f_m67_001	LiR-02f_m67_001		52	24	44	32	32	32		0.938644	0.732867	0.814138	0.323283	0.780394	0.483765		16.1093	8.71623	11.9941	11.6447	11.272	15.1862
AcG-01x_m67_002	acR-02f_m67_001	FTT-04x_m67_001	GMA-01f_m67_003	LiG-02f_m67_001	LiR-02f_m67_001		56	28	20	40	16	16		1.01751	0.688265	0.191843	0.614396	0.508821	0.328397		11.0081	10.5794	11.0141	14.6205	9.75629	11.2322
AcG-01x_m67_002	acR-02f_m67_001	FTT-04x_m67_001	GMA-01f_m67_003	LiG-02f_m67_001	LiR-02f_m67_001		44	64	24	20	68	16		0.632461	1.21286	0.29833	0.367619	0.892554	0.532616		12.3764	13.5144	11.6205	14.4201	14.2514	8.32751
AcG-01x_m67_002	acR-02f_m67_001	FTT-04x_m67_001	GMA-01f_m67_003	LiG-02f_m67_001	LiR-02f_m67_001		84	128	20	40	16	40		0.937988	1.31731	0.278537	0.811788	0.526506	0.442697		16.2743	18.6083	9.95599	15.2175	11.5609	11.9783
AcG-01x_m67_002	acR-02f_m67_001	FTT-04x_m67_001	GMA-01f_m67_003	LiG-02f_m67_001	LiR-02f_m67_001		92	16	24	16	20	28		0.716223	0.458345	0.944316	0.357863	0.516551	0.325962		14.3112	8.45027	12.0852	12.7246	14.5693	12.1758
AcG-01x_m67_002	acR-02f_m67_001	FTT-04x_m67_001	GMA-01f_m67_003	LiG-02f_m67_001	LiR-02f_m67_001		24	20	32	208	28	24		0.605838	0.877712	0.649125	1.2245	0.531913	0.476712		14.013	11.6769	16.4817	21.8981	13.5988	10.3592
AcG-01x_m67_002	acR-02f_m67_001	FTT-04x_m67_001	GMA-01f_m67_003	LiG-02f_m67_001	LiR-02f_m67_001		16	28	360	28	20	24		0.127734	0.527392	0.751182	0.767752	0.471144	0.610499		11.3532	12.0419	15.5465	16.096	10.9341	11.142
AcG-01x_m67_002	acR-02f_m67_001	FTT-04x_m67_001	GMA-01f_m67_003	LiG-02f_m67_001	LiR-02f_m67_001		36	20	16	72	16	36		0.366185	0.479359	0.441527	0.756226	0.756526	1.34921		13.4029	11.8612	11.8153	17.437	12.4684	8.6308
AcG-01x_m67_002	acR-02f_m67_001	FTT-04x_m67_001	GMA-01f_m67_003	LiG-02f_m67_001	LiR-02f_m67_001		48	96	24	16	24	28		0.763221	0.747823	0.389759	0.733044	0.609432	0.456097		15.2421	19.3606	11.9526	13.3382	10.457	10.1549
AcG-01x_m67_002	acR-02f_m67_001	FTT-04x_m67_001	GMA-01f_m67_003	LiG-02f_m67_001	LiR-02f_m67_001		24	92	16	36	32	16		0.411742	1.2475	0.0793106	0.828673	1.14574	0.521533		13.4103	18.0169	14.2541	16.9655	9.90405	12.7419
AcG-01x_m67_002	acR-02f_m67_001	FTT-04x_m67_001	GMA-01f_m67_003	LiG-02f_m67_001	LiR-02f_m67_001		72	20	16	60	24	128		0.919864	0.763674	0.513999	0.856648	0.444946	0.942802		20.6807	10.8224	9.80859	18.0314	14.4257	13.8644
AcG-01x_m67_002	acR-02f_m67_001	FTT-04x_m67_001	GMA-01f_m67_003	LiG-02f_m67_001	LiR-02f_m67_001		48	104	20	16	20	36		0.364025	1.3447	0.560083	0.304026	0.348098	0.471659		13.9467	25.7629	9.27546	9.74987	9.14861	12.2063
AcG-01x_m67_002	acR-02f_m67_001	FTT-04x_m67_001	GMA-01f_m67_003	LiG-02f_m67_001	LiR-02f_m67_001		28	16	16	28	48	56		0.803838	0.572111	0.500355	0.635822	0.719125	0.784143		12.6013	9.36367	8.77784	15.8487	14.0681	16.6626
AcG-01x_m67_002	acR-02f_m67_001	FTT-04x_m67_001	GMA-01f_m67_003	LiG-02f_m67_001	LiR-02f_m67_001		32	16	32	28	32	20		0.546609	0.309858	0.380675	0.627719	1.10955	0.409573		12.5194	11.4617	10.505	14.459	13.4033	11.0375
AcG-01x_m67_002	acR-02f_m67_001	FTT-04x_m67_001	GMA-01f_m67_003	LiG-02f_m67_001	LiR-02f_m67_001		36	132	16	20	16	116		0.934349	1.492	0.267636	0.549734	0.680623	0.586721		18.3136	17.4792	11.1378	12.2894	10.8606	17.3115
AcG-01x_m67_002	acR-02f_m67_001	FTT-04x_m67_001	GMA-01f_m67_003	LiG-02f_m67_001	LiR-02f_m67_001		64	120	20	20	20	20		0.694505	1.09046	0.576191	0.923165	0.870593	0.175563		14.9795	14.5608	10.5871	14.4705	12.0099	11.95
AcG-01x_m67_002	acR-02f_m67_001	FTT-04x_m67_002	GMA-01f_m67_003	LiG-02f_m67_001	LiR-02f_m67_001		84	120	56	24	24	20		0.81394	1.49398	0.794146	0.729192	1.03192	0.388279		16.0055	20.7765	15.1315	10.8232	12.7817	12.3666
AcG-01x_m67_002	acR-02f_m67_001	FTT-04x_m67_002	GMA-01f_m67_003	LiG-02f_m67_001	LiR-02f_m67_001		60	16	48	28	20	20		0.541893	0.91219	0.558328	0.650012	0.81593	0.410008		16.0966	8.66631	10.3001	13.7806	12.3923	10.5006
AcG-01x_m67_002	acR-02f_m67_001	FTT-04x_m67_002	GMA-01f_m67_003	LiG-02f_m67_001	LiR-02f_m67_001		36	24	36	28	16	40		0.442628	0.340916	0.818112	0.814969	0.449432	0.517211		12.7724	9.78845	11.7552	12.2975	9.6805	9.96725
AcG-01x_m67_002	acR-02f_m67_001	FTT-04x_m67_002	GMA-01f_m67_003	LiG-02f_m67_001	LiR-02f_m67_001		36	16	52	20	16	20		0.708316	0.332328	0.659765	0.286096	0.717578	0.268005		15.5808	10.0202	10.3845	11.0996	12.602	11.7193
AcG-01x_m67_002	acR-02f_m67_001	FTT-04x_m67_002	GMA-01f_m67_003	LiG-02f_m67_001	LiR-02f_m67_001		72	24	28	36	24	40		0.602024	0.564435	0.610708	0.559207	0.720241	0.433787		35.2488	11.0295	14.6078	16.4012	12.6303	12.894
AcG-01x_m67_002	acR-02f_m67_001	FTT-04x_m67_002	GMA-01f_m67_003	LiG-02f_m67_002	LiR-02f_m67_001		44	16	20	28	132	32		0.832544	0.313295	0.416809	0.547114	1.05027	0.587819		14.7025	11.8566	8.75758	13.2778	14.8154	13.3793
AcG-01x_m67_002	acR-02f_m67_001	FTT-04x_m67_002	GMA-01f_m67_003	LiG-02f_m67_002	LiR-02f_m67_001		48	76	32	20	28	96		0.78339	1.11989	0.539756	0.613838	0.568109	0.810391		17.1499	19.1575	9.90647	15.642	11.2026	14.2285
AcG-01x_m67_002	acR-02f_m67_001	FTT-04x_m67_002	GMA-01f_m67_003	LiG-02f_m67_002	LiR-02f_m67_001		44	24	92	24	44	56		0.784097	0.499605	0.631772	0.775192	0.600772	0.805752		17.0225	9.14431	11.0697	13.8155	12.1568	31.8326
AcG-01x_m67_002	acR-02f_m67_001	FTT-04x_m67_002	GMA-01f_m67_003	LiG-02f_m67_002	LiR-02f_m67_001		40	44	24	20	48	52		0.685651	0.985185	0.32759	0.454465	1.14993	0.932623		16.9585	16.1313	14.4545	12.3261	13.9523	20.9363
AcG-01x_m67_002	acR-02f_m67_001	FTT-04x_m67_002	GMA-01f_m67_003	LiG-02f_m67_002	LiR-02f_m67_001		28	76	44	16	24	20		0.565844	1.26232	0.527476	0.835602	0.683547	0.33051		13.9321	24.032	11.9721	15.8212	11.9657	12.0023
AcG-01x_m67_002	acR-02f_m67_001	FTT-04x_m67_002	GMA-01f_m67_003	LiG-02f_m67_002	LiR-02f_m67_001		48	28	32	72	20	76		0.325323	0.538346	0.591063	1.1843	0.2281	0.984215		14.9305	8.94685	10.7074	12.8919	7.96149	14.6462
AcG-01x_m67_002	acR-02f_m67_001	FTT-04x_m67_002	GMA-01f_m67_003	LiG-02f_m67_002	LiR-02f_m67_001		52	64	28	28	16	16		0.671704	0.503395	0.422456	0.532032	0.0363613	0.58076		13.1352	17.9889	11.7828	10.9909	7.826	10.0969
AcG-01x_m67_002	acR-02f_m67_001	FTT-04x_m67_002	GMA-01f_m67_003	LiG-02f_m67_002	LiR-02f_m67_001		32	32	36	60	16	28		0.45971	0.71333	0.605951	0.768916	0.42378	0.530289		15.5807	18.9647	12.5598	12.1238	7.80268	12.8104
AcG-01x_m67_002	acR-02f_m67_001	FTT-04x_m67_002	GMA-01f_m67_003	LiG-02f_m67_002	LiR-02f_m67_001		36	20	32	40	48	16		0.596189	0.63322	0.492405	0.761155	1.12409	0.295216		14.6452	12.8573	11.7407	13.7355	10.8358	11.0598
AcG-01x_m67_002	acR-02f_m67_001	FTT-04x_m67_002	GMA-01f_m67_003	LiG-02f_m67_002	LiR-02f_m67_001		68	40	28	16	56	20		0.582006	0.910744	0.503816	0.699283	1.23179	0.264101		16.1716	10.9705	10.4977	10.2917	13.1162	10.2668
AcG-01x_m67_002	acR-02f_m67_001	FTT-04x_m67_002	GMA-01f_m67_003	LiG-02f_m67_002	LiR-02f_m67_001		28	20	16	28	16	20		0.689111	0.634131	0.313652	0.852414	0.776246	0.411573		17.2189	11.2261	10.0312	11.0278	9.43677	10.0719
AcG-01x_m67_002	acR-02f_m67_001	FTT-04x_m67_002	GMA-01f_m67_003	LiG-02f_m67_002	LiR-02f_m67_001		28	32	48	72	32	16		0.164517	0.842665	0.602469	1.16903	0.700728	0.531843		12.2028	13.5048	10.5209	12.8512	12.7639	12.3938
AcG-01x_m67_002	acR-02f_m67_001	FTT-04x_m67_002	GMA-01f_m67_003	LiG-02f_m67_002	LiR-02f_m67_001		56	24	16	48	28	56		0.998361	0.86581	0.141692	0.807776	0.979026	0.883064		21.3193	9.62698	11.6605	11.0121	10.5719	19.7386
AcG-01x_m67_002	acR-02f_m67_001	FTT-04x_m67_002	GMA-01f_m67_003	LiG-02f_m67_002	LiR-02f_m67_001		44	28	24	72	28	68		0.607257	0.402325	0.393127	0.821648	0.757615	0.684279		14.2374	10.85	10.5705	14.1472	9.67137	16.6258
AcG-01x_m67_002	acR-02f_m67_001	FTT-04x_m67_002	GMA-01f_m67_003	LiG-02f_m67_002	LiR-02f_m67_002		20	44	28	24	28	112		0.590473	0.539935	0.699572	0.580288	0.890724	0.788777		14.2569	12.6544	15.3323	10.4028	13.0422	16.4203
AcG-01x_m67_002	acR-02f_m67_001	FTT-04x_m67_002	GMA-01f_m67_003	LiG-02f_m67_002	LiR-02f_m67_002		28	16	20	208	16	24		0.370838	0.385349	0.26781	1.25905	0.464053	0.438009		17.008	11.9954	12.1675	22.6422	11.0639	9.96016
AcG-01x_m67_002	acR-02f_m67_001	FTT-04x_m67_002	GMA-01f_m67_003	LiG-02f_m67_002	LiR-02f_m67_002		24	44	16	48	16	28		0.411534	1.19988	0.433759	0.637541	0.778053	0.540399		14.8705	17.9192	13.599	14.8219	8.97546	11.4025
AcG-01x_m67_002	acR-02f_m67_001	FTT-04x_m67_002	GMA-01f_m67_003	LiG-02f_m67_002	LiR-02f_m67_002		28	44	16	96	92	20		0.625878	1.02029	0.365697	1.14201	1.35388	0.258309		22.9833	22.271	13.655	14.3947	14.638	9.56279
AcG-01x_m67_002	acR-02f_m67_001	FTT-04x_m67_002	GMA-01f_m67_003	LiG-02f_m67_002	LiR-02f_m67_002		44	32	16	24	28	48		0.66168	0.546616	0.362888	0.633846	0.489889	0.737338		22.5198	25.1844	11.4468	14.3674	8.90351	10.2638
AcG-01x_m67_002	acR-02f_m67_001	FTT-04x_m67_002	GMA-01f_m67_003	LiG-02f_m67_002	LiR-02f_m67_002		24	40	44	68	28	16		0.454243	0.803705	0.441457	1.26921	0.508706	0.285436		16.3183	14.8368	15.6759	19.7554	9.3883	9.05601
AcG-02x_m67_001	acR-02f_m67_001	FTT-04x_m67_002	GMA-01f_m67_003	LiG-02f_m67_002	LiR-02f_m67_002		32	20	56	36	16	80		1.16635	0.842521	0.514617	0.797134	0.465851	0.75577		11.8283	11.0526	10.4643	11.6212	9.31376	9.94145
AcG-02x_m67_001	acR-02f_m67_001	FTT-04x_m67_002	GMA-01f_m67_003	LiG-02f_m67_002	LiR-02f_m67_002		24	24	68	40	24	72		0.381757	0.53349	0.653475	0.610941	0.616373	0.754381		12.7524	17.1663	12.6134	10.8445	10.3685	10.9047
AcG-02x_m67_001	acR-02f_m67_001	FTT-04x_m67_002	GMA-01f_m67_003	LiG-02f_m67_002	LiR-02f_m67_002		32	24	44	36	20	40		0.455342	0.990375	0.666359	0.877446	0.575046	0.386716		16.5058	12.1378	10.4062	19.1132	15.7863	9.26686
AcG-02x_m67_001	acR-02f_m67_001	FTT-05x_m67_002	GMA-01f_m67_003	LiG-02f_m67_002	LiR-02f_m67_002		20	20	28	60	32	24		0.20568	0.125253	0.30511	1.29948	0.74989	0.244916		11.7251	15.7348	14.9692	14.7187	12.7434	8.30053
AcG-02x_m67_001	acR-02f_m67_001	FTT-05x_m67_002	GMA-01f_m67_003	LiG-02f_m67_002	LiR-02f_m67_002		32	20	20	32	48	72		0.394035	0.622592	0.585515	0.956201	1.24565	1.07275		15.6197	10.8754	12.2907	14.8369	10.9761	14.5937
AcG-02x_m67_001	acR-02f_m67_001	FTT-05x_m67_002	GMA-01f_m67_003	LiG-02f_m67_002	LiR-02f_m67_002		16	48	32	28	68	192		0.132365	1.56902	0.539867	0.578313	1.64372	1.02419		14.4287	20.1203	12.101	11.1023	12.5047	13.6747
AcG-02x_m67_001	acR-02f_m67_001	FTT-05x_m67_002	GMA-01f_m67_003	LiG-02f_m67_002	LiR-02f_m67_002		260	28	32	60	56	76		0.948309	0.765915	0.895678	0.736953	0.944051	0.510315		21.3099	12.7079	17.2715	13.6299	13.0136	12.2678
AcG-02x_m67_001	acR-02f_m67_002	FTT-05x_m67_002	GMA-01f_m67_003	LiG-02f_m67_002	LiR-02f_m67_002		68	124	44	24	16	68		0.82847	0.781283	0.543826	0.444269	0.7602	0.943161		12.5668	11.803	13.0861	11.3517	10.9724	12.4204
AcG-02x_m67_001	acR-02f_m67_002	FTT-05x_m67_002	GMA-01f_m67_003	LiG-02f_m67_002	LiR-02f_m67_002		100	40	32	24	20	36		1.17711	1.12795	0.272173	0.421925	0.67393	0.538272		15.4866	16.5387	10.8933	9.69084	10.3014	13.8749
AcG-02x_m67_001	acR-02f_m67_002	FTT-05x_m67_002	GMA-01f_m67_003	LiG-02f_m67_002	LiR-02f_m67_002		68	16	16	40	20	84		0.741091	0.478336	0.944919	0.430588	0.211391	0.675895		12.8779	9.79	8.34156	12.4483	8.29833	14.1279
AcG-02x_m67_001	acR-02f_m67_002	FTT-05x_m67_002	GMA-01f_m67_003	LiG-02f_m67_002	LiR-02f_m67_002		56	16	20	48	64	16		0.966563	0.691543	0.672764	1.25836	0.725063	0.637862		15.6223	11.271	13.2769	18.9548	6.33556	8.68051
AcG-02x_m67_001	acR-02f_m67_002	FTT-05x_m67_002	GMA-01f_m67_003	LiG-02f_m67_002	LiR-02f_m67_002		32	68	60	40	24	92		0.57675	0.869375	0.61259	0.487357	0.455916	1.16111		9.9506	12.7986	14.6468	11.7455	10.6655	18.9282
AcG-02x_m67_001	acR-02f_m67_002	FTT-05x_m67_002	GMA-01f_m67_003	LiG-02f_m67_002	LiR-02f_m67_002		148	52	28	48	16	24		1.11621	0.589554	0.579305	0.635617	0.646113	0.577528		15.6341	8.92184	9.67177	13.615	11.7553	10.3607
AcG-02x_m67_001	acR-02f_m67_002	FTT-05x_m67_002	GMA-01f_m67_003	LiG-02f_m67_002	LiR-02f_m67_002		20	88	16	20	44	20		0.448224	0.993823	0.589331	0.403338	0.928856	0.310442		10.2673	12.4158	10.2976	11.1491	11.6107	9.84525
AcG-02x_m67_001	acR-02f_m67_002	FTT-05x_m67_002	GMA-01f_m67_003	LiG-02f_m67_002	LiR-02f_m67_002		24	56	48	52	48	16		0.45903	0.626877	0.630781	0.701386	0.869434	0.633342		10.4186	10.04	16.7713	11.4172	9.65992	12.9256
AcG-02x_m67_001	acR-02f_m67_002	FTT-05x_m67_002	GMA-01f_m67_003	LiG-02f_m67_002	LiR-02f_m67_002		80	200	72	48	40	112		0.925524	0.958466	1.1571	0.708391	0.962372	0.763848		12.8839	13.4355	20.876	11.9173	14.1145	14.1894
AcG-02x_m67_001	acR-02f_m67_002	FTT-05x_m67_002	GMA-01f_m67_003	LiG-02f_m67_002	LiR-02f_m67_002		20	36	48	28	56	84		0.358481	0.39995	0.794983	0.517237	1.09341	1.2664		9.04362	10.0687	16.5777	11.5536	13.6464	17.8652
AcG-02x_m67_001	acR-02f_m67_002	FTT-05x_m67_002	GMA-01f_m67_003	LiG-02f_m67_002	LiR-02f_m67_002		76	104	40	16	104	208		0.478276	0.646216	0.665437	0.358105	1.5555	1.23481		11.3674	15.7335	13.6414	13.0811	10.6144	15.1371
AcG-02x_m67_001	acR-02f_m67_002	FTT-05x_m67_002	GMA-01f_m67_003	LiG-02f_m67_002	LiR-02f_m67_002		32	44	20	32	64	16		0.480883	0.52759	0.353461	1.36007	0.497416	0.243312		10.1784	13.7969	9.747	11.3594	8.84614	9.21081
AcG-02x_m67_001	acR-02f_m67_002	FTT-05x_m67_002	GMA-01f_m67_003	LiG-02f_m67_002	LiR-02f_m67_002		64	24	40	76	16	48		0.586536	0.615192	0.670703	1.10083	0.353086	0.679402		11.1695	15.189	17.2043	22.8491	9.76486	11.8031
AcG-02x_m67_001	acR-02f_m67_002	FTT-05x_m67_002	GMA-01f_m67_003	LiG-02f_m67_002	LiR-02f_m67_002		152	120	24	16	16	56		0.792866	1.10817	0.589747	0.187244	0.529752	0.73257		15.5709	14.2807	13.6356	11.1299	9.6037	11.0979
AcG-02x_m67_001	acR-02f_m67_002	FTT-05x_m67_002	GMA-01f_m67_003	LiG-02f_m67_002	LiR-02f_m67_002		72	28	44	48	64	16		0.632273	0.229912	0.808318	0.956049	0.725462	0.373496		14.4662	9.12658	10.1895	14.7753	11.9684	10.2395
AcG-02x_m67_001	acR-02f_m67_002	FTT-06x_m67_001	GMA-01f_m67_003	LiG-02f_m67_002	LiR-02f_m67_002		28	36	20	28	32	20		0.388016	0.456755	0.274563	0.356931	0.683052	0.138727		10.4411	11.0548	8.46569	11.1419	11.6689	9.52196
AcG-02x_m67_001	acR-02f_m67_002	FTT-06x_m67_001	GMA-01f_m67_003	LiG-02f_m67_002	LiR-02f_m67_002		60	104	44	24	32	16		0.749033	0.837783	0.735579	0.376673	1.54065	0.290464		14.5598	18.1605	14.6293	11.3595	14.8628	7.84385
AcG-02x_m67_001	acR-02f_m67_002	FTT-06x_m67_001	GMA-01f_m67_003	LiG-02f_m67_002	LiR-02f_m67_002		240	24	52	16	16	16		0.706811	0.693482	0.510982	0.461276	0.590307	0.439602		22.785	11.7922	11.6578	8.60131	9.71042	9.88166
AcG-02x_m67_001	acR-02f_m67_002	FTT-06x_m67_001	GMA-01f_m67_003	LiG-02f_m67_002	LiR-02f_m67_002		124	36	36	28	168	296		0.841091	0.8816	0.499581	0.740891	0.976405	1.15252		16.7571	14.1106	9.13299	12.8795	12.8317	28.0569
AcG-02x_m67_001	acR-02f_m67_002	FTT-06x_m67_001	GMA-01f_m67_003	LiG-02f_m67_002	LiR-02f_m67_002		20	32	32	20	16	52		0.273481	0.536801	0.79331	0.479974	0.341945	0.602741		10.3143	12.0214	12.4447	10.2029	9.30426	10.5767
AcG-02x_m67_001	acR-02f_m67_002	FTT-06x_m67_001	GMA-01f_m67_003	LiG-02f_m67_002	LiR-02f_m67_002		80	48	96	16	16	64		0.911445	0.835578	1.09082	0.147431	0.321367	0.965607		15.6382	11.8107	15.8722	16.044	9.54638	11.4736
AcG-02x_m67_001	acR-02f_m67_002	FTT-06x_m67_001	GMA-01f_m67_003	LiG-02f_m67_002	LiR-02f_m67_002		124	28	56	24	28	164		0.857356	0.441234	0.671131	0.247567	0.157881	0.782062		12.6646	11.5019	14.1976	10.5527	9.88394	16.8603
AcG-02x_m67_001	acR-02f_m67_002	FTT-06x_m67_001	GMA-01f_m67_003	LiG-02f_m67_002	LiR-02f_m67_002		24	120	52	24	20	44		0.456321	0.650401	0.841799	0.552283	0.252241	0.605381		11.0142	18.0979	10.9981	11.3338	11.6232	9.46253
AcG-02x_m67_001	acR-02f_m67_002	FTT-06x_m67_001	GMA-01f_m67_003	LiG-02f_m67_002	LiR-02f_m67_002		196	80	20	132	20	32		0.998293	1.16726	0.668349	1.23069	0.305333	0.654263		19.5066	13.204	11.7133	22.7995	10.1001	11.9566
AcG-02x_m67_001	acR-02f_m67_002	FTT-06x_m67_001	GMA-01f_m67_003	LiG-02f_m67_002	LiR-02f_m67_002		56	32	72	28	16	36		0.755497	0.954781	0.772216	0.237175	0.968522	0.485663		23.1238	10.2265	17.0296	13.2646	9.01127	10.9351
AcG-02x_m67_001	acR-02f_m67_002	FTT-06x_m67_001	GMA-01f_m67_003	LiG-02f_m67_002	LiR-02f_m67_002		140	20	36	168	16	48		0.844448	0.534386	0.664139	1.30845	0.1265	0.670399		14.0098	9.29903	9.64662	20.6893	8.1632	11.9989
AcG-02x_m67_001	acR-02f_m67_002	FTT-06x_m67_001	GMA-01f_m67_003	LiG-02f_m67_002	LiR-02f_m67_002		36	76	40	20	36	56		0.382502	0.54775	0.497411	0.414004	0.768355	0.689771		10.9474	11.3246	12.7339	12.0721	11.9592	11.4134
AcG-02x_m67_001	acR-02f_m67_002	FTT-06x_m67_001	GMA-01f_m67_003	LiG-02f_m67_002	LiR-02f_m67_002		36	28	32	16	32	36		0.617386	0.421975	0.738358	0.328993	0.521539	0.168625		13.5055	11.2622	8.90029	10.4112	9.38434	9.11985
AcG-02x_m67_001	acR-02f_m67_002	FTT-06x_m67_001	GMA-01f_m67_003	LiG-02f_m67_002	LiR-02f_m67_002		28	48	20	64	32	144		0.367442	1.0484	0.285524	0.826754	0.474031	0.633703		12.8895	15.8395	12.7776	15.0678	6.55961	24.9847
AcG-02x_m67_001	acR-02f_m67_002	FTT-06x_m67_001	GMA-01f_m67_003	LiG-02f_m67_002	LiR-02f_m67_002		88	16	68	20	28	28		0.633582	0.291606	0.422495	0.36217	0.677559	0.365564		13.414	11.8037	14.654	8.86928	11.272	10.3135
AcG-02x_m67_001	acR-02f_m67_002	FTT-06x_m67_001	GMA-01f_m67_003	LiG-02f_m67_002	LiR-02f_m67_002		68	40	52	64	24	32		0.749036	0.891915	0.530793	1.21619	0.447435	0.480915		15.1675	12.65	11.7013	21.7132	11.4203	10.7831
AcG-02x_m67_001	acR-02f_m67_002	FTT-06x_m67_001	GMA-01f_m67_003	LiG-02f_m67_002	LiR-02f_m67_002		108	48	44	40	20	16		0.683267	0.759379	0.346731	0.832662	0.652249	0.408429		15.2076	14.3698	11.4516	14.5425	10.9744	11.1085
AcG-02x_m67_001	acR-02f_m67_002	FTT-06x_m67_001	GMA-01f_m67_003	LiG-02f_m67_002	LiR-02f_m67_002		32	40	20	24	16	28		0.719159	0.678435	0.445567	0.385451	0.687617	0.450453		13.9021	11.145	9.27505	12.5867	8.20798	13.8478
AcG-02x_m67_001	acR-02f_m67_002	FTT-06x_m67_001	GMA-01f_m67_003	LiG-02f_m67_002	LiR-02f_m67_002		100	20	20	16	24	16		1.06818	0.329102	0.166053	0.138432	0.513475	0.394184		18.7207	8.98132	10.9603	10.9471	7.62823	11.4179
AcG-02x_m67_001	acR-02f_m67_002	FTT-06x_m67_001	GMA-01f_m67_003	LiG-02f_m67_002	LiR-02f_m67_002		36	16	96	56	16	20		0.360305	0.594482	0.848762	1.2273	0.633518	0.353543		11.4662	11.4159	14.7109	15.8781	10.4606	13.0264
AcG-02x_m67_001	acR-02f_m67_002	FTT-06x_m67_001	GMA-01f_m67_003	LiG-02f_m67_002	LiR-02f_m67_002		40	36	148	24	16	16		0.433031	0.936981	0.949991	0.659044	0.406395	0.556967		15.1998	14.9928	16.1691	11.6363	10.029	10.5513
AcG-02x_m67_001	acR-02f_m67_002	FTT-06x_m67_001	GMA-01f_m67_003	LiG-02f_m67_002	LiR-02f_m67_002		60	28	16	28	68	16		1.43836	0.666368	0.352516	0.84571	0.737607	0.359552		19.8682	11.618	11.1364	10.684	11.5706	9.8172
AcG-02x_m67_001	acR-02f_m67_002	FTT-06x_m67_001	GMA-01f_m67_003	LiG-02f_m67_002	LiR-02f_m67_002		60	36	20	72	16	44		1.02815	0.74952	0.204624	1.09876	0.628607	1.01938		19.2887	16.293	10.9021	15.4771	10.2023	10.289
AcG-02x_m67_001	acR-02f_m67_002	FTT-06x_m67_001	GMA-01f_m67_003	LiG-02f_m67_002	LiR-02f_m67_002		116	20	40	56	16	24		0.926107	0.261843	0.532785	0.514309	0.356359	0.688407		20.0966	11.3923	12.5132	12.3712	9.66577	13.4576
AcG-02x_m67_001	acR-02f_m67_002	FTT-06x_m67_001	GMA-01f_m67_003	LiG-02f_m67_002	LiR-02f_m67_002		56	48	24	28	36	264		0.944182	0.565378	0.595231	1.55613	0.405637	1.5922		16.2039	12.1165	13.6125	17.4837	11.8857	22.3807
AcG-02x_m67_001	acR-02f_m67_002	FTT-06x_m67_001	GMA-01f_m67_003	LiG-02f_m67_002	LiR-02f_m67_002		24	32	76	40	56	20		0.294686	0.80292	0.681202	1.29704	0.495579	0.347055		12.3284	12.1192	14.9661	14.961	6.62666	9.85291
AcG-02x_m67_001	acR-02f_m67_003	FTT-06x_m67_001	GMA-01f_m67_003	LiG-02f_m67_002	LiR-02f_m67_002		36	60	48	52	24	16		0.613807	0.746836	0.3553	0.96929	0.884253	0.661568		14.8055	13.0147	12.4591	13.2075	12.0297	9.18951
AcG-02x_m67_001	acR-02f_m67_003	FTT-06x_m67_001	GMA-01f_m67_003	LiG-02f_m67_002	LiR-02f_m67_002		108	16	72	40	16	28		1.44957	0.154548	0.514522	0.469374	0.63559	0.320798		18.6005	9.39418	15.731	11.7789	10.0383	9.97966
AcG-02x_m67_001	acR-02f_m67_003	FTT-06x_m67_001	GMA-03f_m67_001	LiG-02f_m67_002	LiR-02f_m67_002		32	20	40	44	16	20		0.551463	0.528406	0.417503	0.404691	0.476365	0.682593		11.8574	12.1345	14.2361	10.9279	9.69104	11.4483
AcG-02x_m67_001	acR-02f_m67_003	FTT-06x_m67_001	GMA-03f_m67_001	LiG-02f_m67_002	LiR-02f_m67_002		24	16	28	24	20	28		0.274352	0.164793	0.683167	0.437078	0.427062	0.868509		11.477	31.5005	21.9836	9.44492	14.7559	11.2265
AcG-02x_m67_001	acR-02f_m67_003	FTT-06x_m67_001	GMA-03f_m67_001	LiG-02f_m67_002	LiR-02f_m67_002		20	28	16	48	16	196		0.194021	0.455493	0.369475	0.606854	0.318226	1.25613		11.9249	8.7936	13.7584	14.7495	8.16314	16.2608
AcG-02x_m67_001	acR-02f_m67_003	FTT-06x_m67_001	GMA-03f_m67_001	LiG-02f_m67_002	LiR-02f_m67_002		20	76	64	20	20	340		0.151308	0.788607	0.635299	0.375118	0.555903	0.969939		10.7738	13.0128	12.9528	10.3955	12.1617	17.7812
AcG-02x_m67_001	acR-02f_m67_003	FTT-06x_m67_001	GMA-03f_m67_001	LiG-02f_m67_002	LiR-02f_m67_002		24	48	28	52	28	16		0.36654	0.623331	0.460456	1.01533	0.590031	0.467483		12.092	13.3008	11.6342	10.3934	11.2624	8.62124
AcG-02x_m67_001	acR-02f_m67_003	FTT-06x_m67_001	GMA-03f_m67_001	LiG-02f_m67_002	LiR-02f_m67_003		68	16	84	28	28	96		0.59283	0.330158	1.09271	0.407684	0.529022	1.02605		16.3745	10.996	17.6212	9.74922	10.5365	25.2383
AcG-02x_m67_001	acR-02f_m67_003	FTT-06x_m67_001	GMA-03f_m67_001	LiG-02f_m67_002	LiR-02f_m67_003		20	32	48	156	48	240		0.458783	1.52938	0.605708	1.46099	1.44181	0.892892		12.5869	8.69377	11.3812	19.8334	13.3307	17.3088
AcG-02x_m67_001	acR-02f_m67_003	FTT-06x_m67_002	GMA-03f_m67_001	LiG-02f_m67_002	LiR-02f_m67_003		20	44	16	40	36	64		0.265427	0.933707	0.473809	0.738093	0.681695	0.742259		10.0374	9.90381	8.60763	10.484	11.2815	10.2231
AcG-02x_m67_001	acR-02f_m67_003	FTT-06x_m67_002	GMA-03f_m67_001	LiG-02f_m67_002	LiR-02f_m67_003		96	16	68	120	52	60		0.477956	0.148038	1.03041	1.2096	1.20634	0.898864		14.6064	9.8383	15.5797	29.5006	14.6303	21.6632
AcG-02x_m67_001	acR-02f_m67_003	FTT-06x_m67_002	GMA-03f_m67_001	LiG-02f_m67_002	LiR-02f_m67_003		36	20	84	20	16	28		0.594315	0.561344	0.758583	0.570776	0.418109	0.67025		11.6934	8.17208	15.574	11.4487	10.7719	10.8079
AcG-02x_m67_001	acR-02f_m67_003	FTT-06x_m67_002	GMA-03f_m67_001	LiG-02f_m67_002	LiR-02f_m67_003		44	16	84	16	28	36		0.455224	0.203812	1.06398	0.556586	0.533773	0.513696		13.1688	23.9155	14.7465	12.2905	10.5471	12.3862
AcG-02x_m67_001	acR-02f_m67_003	FTT-06x_m67_002	GMA-03f_m67_001	LiG-02f_m67_002	LiR-02f_m67_003		60	20	24	28	52	48		0.791812	0.805108	0.660727	0.795688	0.234335	0.324627		22.7492	11.6153	10.3487	13.6205	6.63249	10.9279
AcG-02x_m67_001	acR-02f_m67_003	FTT-06x_m67_002	GMA-03f_m67_001	LiG-02f_m67_002	LiR-02f_m67_003		68	72	72	16	28	56		0.577927	1.18559	1.29822	0.756912	0.443983	1.08033		15.7039	11.7724	19.6217	8.56	11.1338	18.9055
AcG-02x_m67_001	acR-02f_m67_003	FTT-06x_m67_002	GMA-03f_m67_001	LiG-02f_m67_002	LiR-02f_m67_003		32	16	24	16	44	72		0.490996	0.294829	0.489608	0.348402	0.522381	1.09217		15.7238	11.0443	8.07601	9.29216	12.2483	13.0885
AcG-02x_m67_001	acR-02f_m67_003	FTT-06x_m67_002	GMA-03f_m67_001	LiG-02f_m67_002	LiR-02f_m67_003		36	20	28	20	36	72		0.476963	0.366947	0.635718	0.356032	1.23045	0.44332		13.7929	9.67995	11.7525	9.31408	11.243	11.8684
AcG-02x_m67_001	acR-02f_m67_003	FTT-06x_m67_002	GMA-03f_m67_001	LiG-02f_m67_002	LiR-02f_m67_003		76	16	24	20	28	16		0.548306	0.589247	0.690211	0.447213	0.823876	0.447616		11.3037	9.20638	16.5624	10.1767	14.8841	10.3498
AcG-02x_m67_001	acR-02f_m67_003	FTT-06x_m67_002	GMA-03f_m67_001	LiG-02f_m67_002	LiR-02f_m67_003		68	44	20	28	48	16		0.546501	1.00406	0.810307	0.480672	0.389409	0.66213		13.9539	11.024	10.6595	12.3587	10.5942	11.7393
AcG-02x_m67_001	acR-02f_m67_003	FTT-06x_m67_002	GMA-03f_m67_001	LiG-02f_m67_002	LiR-02f_m67_003		40	144	20	32	16	28		0.654407	0.841103	0.279737	0.994087	0.527469	0.290946		14.9878	19.3042	10.8682	13.4487	11.3186	10.6321
AcG-02x_m67_001	acR-02f_m67_003	FTT-06x_m67_002	GMA-03f_m67_001	LiG-02f_m67_002	LiR-02f_m67_003		32	168	32	20	20	84		0.372052	0.864768	0.592035	0.557302	0.414491	1.1955		12.5381	12.5413	10.2953	9.05342	11.8976	18.5365
AcG-02x_m67_001	acR-02f_m67_003	FTT-06x_m67_002	GMA-03f_m67_001	LiG-03f_m67_001	LiR-02f_m67_003		40	32	32	28	212	52		0.393963	0.429049	0.771756	0.507378	1.44833	0.470571		14.7271	14.4831	14.243	11.1715	17.4222	14.0441
AcG-02x_m67_001	acR-02f_m67_003	FTT-06x_m67_002	GMA-03f_m67_001	LiG-03f_m67_001	LiR-02f_m67_003		44	24	60	20	52	40		0.625729	0.921694	0.531153	0.195854	0.759792	0.682394		13.9915	14.5205	10.8295	10.458	11.4286	11.6383
AcG-02x_m67_001	acR-02f_m67_003	FTT-06x_m67_002	GMA-03f_m67_001	LiG-03f_m67_001	LiR-02f_m67_003		20	36	20	16	20	84		0.203047	0.687721	0.689014	0.103956	0.765019	1.33899		11.7075	11.5007	10.8358	10.0503	10.27	21.8971
AcG-02x_m67_001	acR-02f_m67_003	FTT-06x_m67_002	GMA-03f_m67_001	LiG-03f_m67_001	LiR-02f_m67_003		48	20	36	16	184	48		0.948372	0.562012	0.218745	0.309403	1.16485	0.803257		27.8344	9.20197	10.4176	11.4565	16.442	13.301
AcG-02x_m67_002	acR-02f_m67_003	FTT-06x_m67_002	GMA-03f_m67_001	LiG-03f_m67_001	LiR-02f_m67_003		176	36	128	20	48	20		1.54637	1.15547	0.891589	0.266977	0.94151	0.299567		23.8003	13.9493	14.39	10.9259	11.3885	11.099
AcG-02x_m67_002	acR-02f_m67_003	FTT-06x_m67_002	GMA-03f_m67_001	LiG-03f_m67_001	LiR-02f_m67_003		72	92	28	24	44	36		1.50997	0.931256	0.797559	0.248475	0.324451	0.539954		15.9941	10.5808	12.2352	11.413	10.9282	14.5335
AcG-02x_m67_002	acR-02f_m67_003	FTT-06x_m67_002	GMA-03f_m67_001	LiG-03f_m67_001	LiR-02f_m67_003		104	28	16	56	20	20		0.799906	0.658474	0.611375	1.03668	0.301668	0.493445		10.6372	19.1383	12.1826	19.1855	12.1918	11.6916
AcG-02x_m67_002	acR-02f_m67_003	FTT-06x_m67_002	GMA-03f_m67_001	LiG-03f_m67_001	LiR-02f_m67_003		148	32	16	24	24	44		1.0986	0.602521	0.514207	0.538124	0.795917	0.260449		28.1656	47.0533	10.5803	20.5131	10.351	10.8233
AcG-02x_m67_002	acR-02f_m67_003	FTT-06x_m67_002	GMA-03f_m67_001	LiG-03f_m67_001	LiR-02f_m67_003		88	64	88	24	16	52		0.662625	0.988812	0.723795	0.465794	0.381362	0.440983		10.3526	11.0506	13.9189	9.61683	9.96158	13.5544
AcG-02x_m67_002	acR-02f_m67_003	FTT-06x_m67_002	GMA-03f_m67_001	LiG-03f_m67_001	LiR-02f_m67_003		72	20	32	20	32	20		0.708273	1.06052	0.744953	0.304013	0.62332	0.466521		20.5565	10.6238	11.8118	9.62357	9.73321	12.5589
AcG-02x_m67_002	acR-02f_m67_003	FTT-06x_m67_002	GMA-03f_m67_001	LiG-03f_m67_001	LiR-02f_m67_003		236	28	64	44	104	72		1.27518	0.264074	1.02495	0.523514	1.72509	0.699973		19.39	11.4773	15.2035	13.0542	17.0044	14.8089
AcG-02x_m67_002	acR-02f_m67_003	FTT-06x_m67_002	GMA-03f_m67_001	LiG-03f_m67_001	LiR-02f_m67_003		28	64	36	28	20	136		0.368612	0.656133	0.735652	0.62602	0.113367	1.05993		11.4439	17.9549	14.1769	12.6746	9.29078	20.5429
AcG-02x_m67_002	acR-02f_m67_003	FTT-06x_m67_002	GMA-03f_m67_001	LiG-03f_m67_001	LiR-02f_m67_003		32	24	60	44	48	96		0.521079	0.546699	0.770428	0.700797	0.830456	0.750234		11.3307	14.0439	16.0547	12.7245	12.1188	18.6139
AcG-02x_m67_002	acR-02f_m67_003	FTT-06x_m67_002	GMA-03f_m67_001	LiG-03f_m67_001	LiR-02f_m67_003		56	52	36	24	16	20		0.801135	0.417817	0.445926	0.592984	0.312697	0.422721		10.8683	10.0902	12.3349	13.0694	11.1938	9.99341
AcG-02x_m67_002	acR-02f_m67_003	FTT-06x_m67_002	GMA-03f_m67_001	LiG-03f_m67_001	LiR-02f_m67_003		156	16	16	16	16	92		1.55307	0.382399	0.166566	0.415444	0.357237	1.21768		20.0823	8.78722	11.9018	12.7893	9.87796	20.8847
AcG-02x_m67_002	acR-02f_m67_003	FTT-06x_m67_002	GMA-03f_m67_001	LiG-03f_m67_001	LiR-02f_m67_003		104	64	76	20	24	136		1.06182	1.25716	1.10295	0.403152	1.06108	0.698606		14.1572	11.6936	20.6216	10.031	13.5546	19.9348
AcG-02x_m67_002	acR-02f_m67_003	FTT-06x_m67_002	GMA-03f_m67_001	LiG-03f_m67_001	LiR-02f_m67_003		20	28	56	20	20	60		0.422287	0.747681	0.663106	0.211465	0.427805	0.479532		9.67206	9.1566	12.5325	9.79407	10.205	12.8838
AcG-02x_m67_002	acR-02f_m67_003	FTT-06x_m67_002	GMA-03f_m67_001	LiG-03f_m67_001	LiR-02f_m67_003		172	24	24	136	32	112		1.01149	0.551572	0.562143	1.07914	0.847006	0.909029		20.5276	23.5999	11.3477	17.529	10.6832	24.0393
AcG-02x_m67_002	acR-02f_m67_003	FTT-06x_m67_002	GMA-03f_m67_001	LiG-03f_m67_001	LiR-02f_m67_003		116	24	28	20	24	40		1.17113	0.323058	0.547187	0.666129	0.8185	0.261253		23.7897	11.5946	12.2659	10.2569	9.58911	13.6493
AcG-02x_m67_002	acR-02f_m67_003	FTT-06x_m67_002	GMA-03f_m67_002	LiG-03f_m67_001	LiR-02f_m67_003		64	44	32	84	28	60		0.71903	0.864967	0.44633	1.26093	0.697825	0.906988		12.3132	12.9389	12.4243	20.4244	12.0531	18.3342
AcG-02x_m67_002	acR-02f_m67_003	FTT-06x_m67_002	GMA-03f_m67_002	LiG-03f_m67_002	LiR-02f_m67_003		84	24	20	64	16	28		1.03774	0.260229	0.709054	0.9983	0.489857	0.488416		13.8673	20.3273	13.0875	14.0747	10.2081	11.5859
AcG-02x_m67_002	acR-02f_m67_003	FTT-06x_m67_002	GMA-03f_m67_002	LiG-03f_m67_002	LiR-02f_m67_003		36	76	28	24	148	20		0.553677	0.543236	0.680577	0.750881	0.76956	0.486018		11.3095	25.7262	12.9836	18.0988	30.7501	12.0594
AcG-02x_m67_002	acR-02f_m67_003	FTT-06x_m67_002	GMA-03f_m67_002	LiG-03f_m67_002	LiR-02f_m67_003		60	20	24	40	100	28		0.918217	0.823477	0.694857	0.480854	1.2003	0.685746		19.5676	12.9551	15.0163	15.633	12.945	14.0601
AcG-02x_m67_002	acR-02f_m67_003	FTT-06x_m67_002	GMA-03f_m67_002	LiG-03f_m67_002	LiR-02f_m67_003		100	28	40	36	24	292		0.725881	0.780049	0.84179	0.393356	0.677418	1.1972		22.3872	10.4689	12.0123	9.70671	12.3942	25.9194
AcG-02x_m67_002	acR-02f_m67_003	FTT-06x_m67_002	GMA-03f_m67_002	LiG-03f_m67_002	LiR-03f_m67_001		32	16	28	36	364	52		0.384091	0.508413	0.69706	0.473503	0.996512	0.579479		11.8697	8.52388	11.3218	11.3323	27.8396	14.7373
AcG-02x_m67_002	acR-02f_m67_003	FTT-06x_m67_002	GMA-03f_m67_002	LiG-03f_m67_002	LiR-03f_m67_001		180	24	40	32	16	40		1.17586	0.9605	0.458312	0.420966	0.395725	0.724722		16.8677	9.62409	11.3955	8.46751	12.8018	12.4123
AcG-02x_m67_002	acR-02f_m67_003	FTT-06x_m67_002	GMA-03f_m67_002	LiG-03f_m67_002	LiR-03f_m67_001		16	32	16	28	44	60		0.15223	0.56413	0.126045	0.378264	1.36631	0.770751		14.1818	41.2268	14.0421	9.00147	12.5489	13.1975
AcG-02x_m67_002	acR-02f_m67_003	FTT-06x_m67_002	GMA-03f_m67_002	LiG-03f_m67_002	LiR-03f_m67_001		28	16	16	64	20	96		0.20347	0.806447	0.487151	0.672773	0.429813	0.570732		9.64899	14.4872	16.7445	14.9137	15.5689	10.9968
AcG-02x_m67_002	acR-02f_m67_003	FTT-06x_m67_002	GMA-03f_m67_002	LiG-03f_m67_002	LiR-03f_m67_001		40	16	48	104	24	80		0.837523	0.8872	0.697753	1.10783	0.959234	0.838934		13.0264	8.68133	16.7459	16.2171	19.9451	13.5803
AcG-02x_m67_002	acR-02f_m67_003	FTT-06x_m67_002	GMA-03f_m67_002	LiG-03f_m67_002	LiR-03f_m67_001		128	40	24	20	76	40		0.483206	0.816868	0.319774	0.166498	1.18901	0.52789		11.1835	24.7749	10.6321	8.38804	12.6008	9.76361
AcG-02x_m67_002	acR-02f_m67_003	FTT-06x_m67_002	GMA-03f_m67_002	LiG-03f_m67_002	LiR-03f_m67_001		216	16	24	28	40	32		1.24997	0.222716	0.678055	0.362694	1.02691	0.350226		19.856	8.91856	12.4447	9.12208	15.8321	7.88111
AcG-02x_m67_002	acR-02f_m67_003	FTT-06x_m67_002	GMA-03f_m67_002	LiG-03f_m67_002	LiR-03f_m67_001		24	20	52	40	88	32		0.270522	0.603344	0.697966	0.628115	1.29888	0.637153		9.10267	12.7322	16.3755	15.5353	17.0599	8.40549
AcG-02x_m67_002	acR-02f_m67_003	FTT-06x_m67_002	GMA-03f_m67_002	LiG-03f_m67_002	LiR-03f_m67_001		156	24	32	36	32	188		1.05727	0.606101	0.241563	0.444006	0.568873	1.19872		16.2997	10.5219	10.9891	8.57609	9.88861	18.0881
AcG-02x_m67_002	acR-02f_m67_003	FTT-06x_m67_002	GMA-03f_m67_002	LiG-03f_m67_002	LiR-03f_m67_001		172	20	16	20	24	56		0.998951	0.257486	0.151043	0.293589	0.654626	0.534157		17.6239	48.2056	12.9494	9.96949	17.8439	11.907
AcG-02x_m67_002	acR-02f_m67_003	FTT-06x_m67_002	GMA-03f_m67_002	LiG-03f_m67_002	LiR-03f_m67_001		32	40	32	40	128	48		0.460401	0.631163	0.885194	0.789331	1.27612	0.675678		13.1206	15.173	18.982	11.0059	17.7151	12.4826
AcG-02x_m67_002	acR-02f_m67_003	FTT-06x_m67_002	GMA-03f_m67_002	LiG-03f_m67_002	LiR-03f_m67_001		60	56	24	36	16	68		0.84661	0.777723	0.638642	0.560824	0.322681	0.471566		15.6813	12.4484	12.8724	11.5374	10.1993	10.7635
AcG-02x_m67_002	acR-02f_m67_003	FTT-06x_m67_002	GMA-03f_m67_002	LiG-03f_m67_002	LiR-03f_m67_001		20	28	24	16	84	68		0.291754	0.396177	0.217992	0.480388	1.28883	0.440522		9.96373	19.0969	11.0763	10.1338	21.101	11.612
AcG-02x_m67_002	acR-02f_m67_003	FTT-06x_m67_002	GMA-03f_m67_002	LiG-03f_m67_002	LiR-03f_m67_001		28	28	16	24	20	24		0.293381	0.220377	0.725464	0.332292	0.396118	0.377017		11.3834	12.6348	10.8499	11.1273	9.60906	11.0862
AcG-02x_m67_002	acR-02f_m67_003	FTT-06x_m67_002	GMA-03f_m67_002	LiG-03f_m67_002	LiR-03f_m67_001		16	28	16	24	24	52		0.337984	0.819111	0.316981	0.372828	0.693924	0.594398		14.6016	12.9962	10.7843	11.1572	10.1138	10.5566
AcG-02x_m67_002	acR-02f_m67_003	FTT-06x_m67_002	GMA-03f_m67_002	LiG-03f_m67_002	LiR-03f_m67_001		24	16	40	36	44	104		0.405771	0.512342	0.560131	0.370835	1.03114	0.902428		10.487	23.3529	14.3897	9.47632	16.9861	18.7933
AcG-02x_m67_002	acR-02f_m67_003	FTT-06x_m67_002	GMA-03f_m67_002	LiG-03f_m67_002	LiR-03f_m67_001		32	24	32	40	20	40		0.252429	0.346685	0.368124	0.504299	0.603221	0.396268		12.0114	20.0643	21.3702	12.7975	11.9723	22.2016
AcG-02x_m67_002	acR-02f_m67_003	FTT-06x_m67_002	GMA-03f_m67_002	LiG-03f_m67_002	LiR-03f_m67_001		72	16	16	64	24	24		0.68779	0.390851	0.68616	1.13163	0.330086	0.641187		15.676	12.8346	9.29657	20.7342	12.7609	11.014
AcG-02x_m67_002	acR-02f_m67_003	FTT-06x_m67_002	GMA-03f_m67_002	LiG-03f_m67_002	LiR-03f_m67_001		20	16	16	52	24	36		0.53106	0.385524	0.293447	1.65516	0.789685	0.669316		12.6406	11.6373	19.0709	17.4719	11.3827	11.3158
AcG-02x_m67_002	acR-02f_m67_003	FTT-06x_m67_002	GMA-03f_m67_002	LiG-03f_m67_002	LiR-03f_m67_001		104	48	16	28	32	80		0.869219	0.560494	0.576749	0.666402	0.980412	0.623829		16.4953	25.1474	15.971	14.7734	13.5088	13.9301
AcG-02x_m67_002	acR-02f_m67_003	FTT-06x_m67_002	GMA-03f_m67_002	LiG-03f_m67_002	LiR-03f_m67_001		112	60	24	32	16	28		1.08921	0.726029	0.587955	0.370092	0.248779	0.388926		21.079	19.2598	11.333	10.7839	9.95924	12.5399
AcG-02x_m67_002	acR-02f_m67_003	FTT-06x_m67_002	GMA-03f_m67_002	LiG-03f_m67_002	LiR-03f_m67_001		100	16	16	16	16	24		1.37399	0.315173	0.418128	0.297265	0.721462	0.659823		19.1703	9.3676	11.6633	10.2016	10.4543	11.3309
AcG-02x_m67_002	acR-02f_m67_003	FTT-06x_m67_002	GMA-03f_m67_002	LiG-03f_m67_002	LiR-03f_m67_001		20	32	32	24	48	148		0.566107	0.871338	1.11395	0.449649	0.778611	1.02476		14.4939	11.4976	14.1042	11.8253	14.1703	14.7474
AcG-02x_m67_002	acR-02f_m67_003	FTT-07f_m67_001	GMA-03f_m67_002	LiG-03f_m67_002	LiR-03f_m67_001		72	16	16	96	20	168		0.710444	0.786439	0.254161	1.14392	0.716829	0.825184		30.7503	9.58962	8.19106	25.8304	8.26604	16.5713
AcG-02x_m67_002	acR-02f_m67_003	FTT-07f_m67_001	GMA-03f_m67_002	LiG-03f_m67_002	LiR-03f_m67_002		32	16	16	16	28	84		0.387171	0.642681	0.659424	0.532364	0.853048	1.01742		13.4218	10.4737	10.5465	9.39722	9.76907	11.8513
AcG-02x_m67_002	acR-02f_m67_003	FTT-07f_m67_001	GMA-03f_m67_002	LiG-03f_m67_002	LiR-03f_m67_002		36	24	16	36	16	20		0.725128	0.583908	0.439326	0.607812	0.463168	0.219914		13.8663	11.7594	11.3642	10.0541	10.4901	9.43086
AcG-02x_m67_002	acR-02f_m67_003	FTT-07f_m67_001	GMA-03f_m67_002	LiG-03f_m67_002	LiR-03f_m67_002		24	20	52	32	24	28		0.171036	0.377961	0.604662	0.287288	1.46954	0.58357		11.7218	10.8058	9.6919	16.7457	8.90072	7.9569
AcG-02x_m67_002	acR-02f_m67_003	FTT-07f_m67_001	GMA-03f_m67_002	LiG-03f_m67_002	LiR-03f_m67_002		36	44	28	24	64	64		0.372664	0.400127	0.285051	0.580322	0.483088	1.09206		12.2388	54.107	12.0337	9.30728	16.5723	19.8532
AcG-02x_m67_002	acR-02f_m67_003	FTT-07f_m67_001	GMA-03f_m67_002	LiG-03f_m67_002	LiR-03f_m67_002		28	20	56	80	32	28		0.704909	0.386485	0.791112	0.792849	0.849586	0.5117		11.1145	9.3963	12.3562	13.0722	12.9995	18.428
AcG-02x_m67_002	acR-02f_m67_003	FTT-07f_m67_002	GMA-03f_m67_002	LiG-03f_m67_002	LiR-03f_m67_002		28	16	20	72	44	16		0.757442	0.164007	0.494069	0.858305	0.876256	0.145478		15.205	7.32789	9.0944	11.2384	13.2961	10.84
AcG-02x_m67_002	acR-02f_m67_003	FTT-07f_m67_002	GMA-03f_m67_002	LiG-03f_m67_002	LiR-03f_m67_002		64	20	104	204	36	84		0.742468	0.782183	0.934452	0.867847	0.864386	0.861802		10.7464	12.0969	15.8657	16.2389	10.2997	17.1421
AcG-02x_m67_002	acR-02f_m67_003	FTT-07f_m67_002	GMA-03f_m67_002	LiG-03f_m67_002	LiR-03f_m67_002		28	20	24	112	144	28		0.301091	0.518107	0.362022	1.14832	1.05232	0.492822		11.1762	9.97164	11.8047	18.5227	13.4407	16.8727
AcG-02x_m67_002	acR-02f_m67_003	FTT-07f_m67_002	GMA-03f_m67_002	LiG-03f_m67_002	LiR-03f_m67_002		40	20	16	16	72	20		0.635002	0.758333	0.570245	1.27548	0.906378	0.390637		10.9746	14.7094	9.72996	16.219	12.377	10.596
AcG-02x_m67_002	acR-02f_m67_003	FTT-07f_m67_002	GMA-03f_m67_002	LiG-03f_m67_002	LiR-03f_m67_002		28	16	32	40	28	84		0.451319	0.264891	0.407263	0.592677	1.14858	0.727272		11.4282	12.3728	12.3026	16.4122	20.6227	13.2256
AcG-02x_m67_002	acR-03f_m67_003	FTT-07f_m67_002	GMA-03f_m67_002	LiG-03f_m67_002	LiR-03f_m67_002		52	28	36	40	20	64		0.538202	0.644436	1.52725	0.60084	0.776067	0.753979		14.2221	12.358	10.6527	11.1354	28.8232	17.8862
AcG-02x_m67_002	acR-03f_m67_003	FTT-07f_m67_002	GMA-03f_m67_002	LiG-03f_m67_002	LiR-03f_m67_002		28	72	16	64	32	88		0.565679	1.14254	0.345112	1.1534	0.389579	0.862761		10.8272	13.5393	9.84657	14.9239	13.4559	14.6788
AcG-02x_m67_002	acR-03f_m67_003	FTT-07f_m67_002	GMA-03f_m67_002	LiG-03f_m67_002	LiR-03f_m67_002		252	16	84	20	44	20		1.18902	0.296207	0.796889	0.437644	1.19041	0.136872		12.8797	15.8092	17.5122	9.08361	15.9505	9.75224
AcG-02x_m67_002	acR-03f_m67_003	FTT-07f_m67_002	GMA-03f_m67_002	LiG-03f_m67_002	LiR-03f_m67_002		36	16	16	20	40	20		0.681343	0.33528	0.33796	0.493217	0.912174	0.288256		19.5549	10.1258	12.0793	13.3956	12.7399	9.63198
AcG-02x_m67_002	acR-03f_m67_003	FTT-07f_m67_002	GMA-03f_m67_002	LiG-03f_m67_002	LiR-03f_m67_002		20	16	52	24	16	104		0.318891	0.231781	1.36778	0.127444	0.188288	1.07555		17.3023	15.9038	20.7528	10.7032	9.68801	19.1866
AcG-02x_m67_002	acR-03f_m67_003	FTT-07f_m67_002	GMA-03f_m67_002	LiG-03f_m67_002	LiR-03f_m67_002		28	24	68	16	64	24		0.79822	0.556148	0.960455	0.248715	1.0141	0.356287		14.7067	8.57468	19.027	10.936	15.514	8.5252
AcG-02x_m67_002	acR-03f_m67_003	FTT-07f_m67_002	GMA-03f_m67_002	LiG-03f_m67_002	LiR-03f_m67_002		28	48	24	20	24	28		0.231119	0.921362	0.540536	1.29686	0.631817	0.582472		11.7409	12.425	13.5154	12.8485	12.385	10.1488
AcG-02x_m67_002	acR-03f_m67_003	FTT-07f_m67_002	GMA-03f_m67_002	LiG-03f_m67_002	LiR-03f_m67_002		16	44	16	52	20	20		0.425973	1.01982	0.293031	0.967258	0.788747	0.392872		11.282	10.3205	13.6822	16.6212	11.0276	12.7096
AcG-03x_m67_002	acR-03f_m67_003	FTT-07f_m67_002	GMA-03f_m67_002	LiG-03f_m67_002	LiR-03f_m67_002		24	52	32	56	24	76		0.352161	0.928072	0.913909	0.449256	0.754023	1.30691		9.72802	15.4897	17.5219	12.8805	12.2814	20.2497
AcG-03x_m67_002	acR-03f_m67_003	FTT-07f_m67_002	GMA-03f_m67_002	LiG-03f_m67_002	LiR-03f_m67_002		76	16	76	24	24	24		1.0037	0.324598	1.15256	0.333387	0.560318	0.195828		15.08	8.46387	20.9642	11.0136	16.805	10.0806
AcG-03x_m67_002	acR-03f_m67_003	FTT-07f_m67_002	GMA-03f_m67_002	LiG-03f_m67_002	LiR-03f_m67_002		224	16	16	92	16	20		1.31563	0.52647	0.352614	0.986774	0.231565	0.613817		14.8509	14.9957	4.60612	15.5575	12.6075	9.4527
AcG-03x_m67_002	acR-03f_m67_003	FTT-07f_m67_002	GMA-03f_m67_002	LiG-03f_m67_002	LiR-03f_m67_002		16	48	16	36	20	24		0.0652358	1.40359	0.41029	0.490785	0.440699	0.31452		8.82164	16.5963	12.7126	10.6346	16.1501	11.6027
AcG-03x_m67_002	acR-03f_m67_003	FTT-07f_m67_003	GMA-03f_m67_002	LiG-03f_m67_002	LiR-03f_m67_002		32	108	68	96	40	16		0.123664	1.3094	0.641009	1.22605	0.744007	0.50493		10.7481	12.5691	12.9879	26.9423	14.6154	8.45001
AcG-03x_m67_002	acR-03f_m67_003	FTT-07f_m67_003	GMA-03f_m67_002	LiG-03f_m67_002	LiR-03f_m67_002		28	56	64	140	24	48		0.458539	0.789792	1.03678	1.04044	0.74673	0.439335		8.93547	12.634	15.0068	15.1164	11.055	10.1136
AcG-03x_m67_002	acR-03f_m67_003	FTT-07f_m67_003	GMA-03f_m67_002	LiG-03f_m67_002	LiR-03f_m67_002		24	20	20	196	20	16		0.273307	0.684087	0.631087	1.18478	0.625734	0.396248		9.40601	11.9221	12.5002	38.7669	9.01547	9.29397
AcG-03x_m67_002	acR-03f_m67_003	FTT-07f_m67_003	GMA-03f_m67_002	LiG-03f_m67_002	LiR-03f_m67_002		24	20	132	32	16	28		0.298378	0.464383	0.856525	0.506901	0.478434	0.743421		10.3512	10.9216	13.9592	12.3028	10.2242	13.7794
AcG-03x_m67_002	acR-03f_m67_003	FTT-07f_m67_003	GMA-03f_m67_002	LiG-03f_m67_002	LiR-03f_m67_002		24	28	88	16	32	44		0.654933	0.64764	0.757497	0.341616	1.04573	0.515891		15.0986	12.7288	12.7511	10.0287	14.1669	10.4121
AcG-03x_m67_002	acR-03f_m67_003	FTT-07f_m67_003	GMA-03f_m67_002	LiG-03f_m67_002	LiR-03f_m67_002		84	28	32	44	16	24		0.729686	0.733186	0.595352	0.412991	0.282759	0.508098		14.9803	12.2307	12.1265	11.2122	15.4354	13.3192
AcG-03x_m67_002	acR-03f_m67_003	FTT-07f_m67_003	GMA-03f_m67_002	LiG-03f_m67_002	LiR-03f_m67_002		28	24	40	60	16	20		0.309565	0.708366	0.562532	0.892974	0.495975	0.681094		9.17421	12.4572	12.2631	17.6562	9.41688	11.6903
AcG-03x_m67_002	acR-03f_m67_003	FTT-07f_m67_003	GMA-03f_m67_002	LiG-03f_m67_002	LiR-03f_m67_002		56	24	148	32	20	24		0.648294	0.451652	0.917001	0.513175	0.899638	0.343533		14.5816	10.8929	15.949	11.6211	12.0833	12.396
AcG-03x_m67_002	acR-03f_m67_003	FTT-07f_m67_003	GMA-03f_m67_002	LiG-03f_m67_002	LiR-03f_m67_002		24	16	68	44	16	28		0.348579	0.370405	1.13038	0.917551	0.844305	0.528602		10.2911	11.906	13.3999	12.079	6.13769	10.6163
AcG-03x_m67_002	acR-03f_m67_003	FTT-07f_m67_003	GMA-03f_m67_002	LiG-03f_m67_002	LiR-03f_m67_002		172	16	20	64	64	32		1.55102	0.215115	0.378907	0.513782	1.15225	0.535522		19.7175	12.3041	11.5536	14.9366	13.2635	11.378
AcG-03x_m67_002	acR-03f_m67_003	FTT-07f_m67_003	GMA-03f_m67_002	LiG-03f_m67_002	LiR-03f_m67_002		44	64	16	72	36	40		0.50731	0.89523	0.289061	0.754287	1.3841	0.793292		14.1834	11.313	11.9778	16.8652	14.9852	19.2424
AcG-03x_m67_002	acR-03f_m67_003	FTT-07f_m67_003	GMA-03f_m67_002	LiG-03f_m67_002	LiR-03f_m67_002		24	20	24	156	64	24		0.514339	0.25887	0.412677	1.14778	1.12967	0.395154		10.5438	9.90559	13.864	23.1287	13.7572	9.67669
AcG-03x_m67_002	acR-03f_m67_003	FTT-07f_m67_003	GMA-03f_m67_002	LiG-03f_m67_002	LiR-03f_m67_002		32	28	20	160	16	36		0.623701	0.683918	0.493064	1.43134	0.535244	0.381486		12.012	9.8686	13.8052	18.3224	13.4852	13.036
AcG-03x_m67_002	acR-03f_m67_003	FTT-07f_m67_003	GMA-03f_m67_002	LiG-03f_m67_002	LiR-03f_m67_002		84	60	20	24	40	36		0.811626	0.63203	0.143451	0.409257	0.81956	0.539729		18.0336	13.0724	13.2874	12.8886	14.665	16.1317
AcG-03x_m67_002	acR-03f_m67_003	FTT-07f_m67_003	GMA-03f_m67_002	LiG-03f_m67_002	LiR-03f_m67_002		60	16	16	40	24	28		0.911857	0.490065	0.508792	1.1939	0.388579	0.745124		15.8863	16.0947	14.0983	17.7504	9.6727	29.5229
AcG-03x_m67_002	acR-03f_m67_003	FTT-07f_m67_003	GMA-03f_m67_002	LiG-03f_m67_002	LiR-03f_m67_002		92	20	20	16	20	16		0.745695	0.202292	0.563093	0.228093	0.403993	0.393358		12.8467	9.55119	12.9644	10.2626	11.3565	9.90846
AcG-03x_m67_002	acR-03f_m67_003	FTT-07f_m67_003	GMA-03f_m67_002	LiG-03f_m67_002	LiR-03f_m67_002		16	16	24	16	40	56		0.293385	0.474224	0.569778	0.548846	0.945615	0.623822		12.6608	12.424	8.47518	12.4522	12.8437	15.199
AcG-03x_m67_002	acR-03f_m67_003	FTT-07f_m67_003	GMA-03f_m67_002	LiG-03f_m67_002	LiR-03f_m67_002		84	40	72	76	44	340		0.805618	0.64615	0.84383	0.839527	1.12163	1.11305		14.5456	18.7908	15.5421	15.4728	13.0533	21.6666
AcG-03x_m67_002	acR-03f_m67_003	FTT-07f_m67_003	GMA-03f_m67_002	LiG-03f_m67_002	LiR-03f_m67_002		24	16	80	32	20	144		0.314983	0.306308	0.829536	0.494888	0.886231	0.932629		16.4399	9.16715	11.6275	13.5082	10.5719	17.9938
AcG-03x_m67_002	acR-03f_m67_003	FTT-07f_m67_003	GMA-03f_m67_002	LiG-03f_m67_002	LiR-03f_m67_003		52	28	24	16	44	28		0.795266	0.44499	0.529084	0.204244	1.65209	0.762424		16.928	12.3728	13.0481	12.0049	18.9483	11.3566
AcG-03x_m67_002	acR-03f_m67_003	FTT-07f_m67_003	GMA-03f_m67_002	LiG-03f_m67_002	LiR-03f_m67_003		20	20	36	24	20	112		0.223966	0.333989	0.976797	0.392141	0.576407	1.51387		9.92552	9.88113	15.8391	10.8025	11.8399	23.3579
AcG-03x_m67_002	acR-03f_m67_003	FTT-07f_m67_003	GMA-03f_m67_002	LiG-03f_m67_002	LiR-03f_m67_003		156	16	36	104	40	28		1.61564	0.454463	0.317965	1.0615	1.15035	0.694071		20.5816	10.6318	10.3208	24.5683	14.6328	12.7186
AcG-03x_m67_002	acR-03f_m67_003		GMA-03f_m67_002	LiG-03f_m67_003	LiR-03f_m67_003		32	16		16	56	84		0.473791	0.240543		0.369507	1.48247	0.825621		11.405	9.72095		10.0058	14.5842	16.2768
AcG-03x_m67_002	acR-03f_m67_003		GMA-03f_m67_002	LiG-03f_m67_003	LiR-03f_m67_003		108	36		128	56	80		0.497395	1.05164		0.707182	1.32461	0.833085		17.1502	11.5109		39.1773	24.6393	13.29
AcG-03x_m67_002	acR-03f_m67_003		GMA-03f_m67_002	LiG-03f_m67_003	LiR-03f_m67_003		68	24		56	72	48		0.631061	0.558713		0.971779	1.08304	0.524127		17.5593	16.3488		17.2974	18.9036	9.84336
AcG-03x_m67_002	acR-03f_m67_003		GMA-03f_m67_002	LiG-03f_m67_003	LiR-03f_m67_003		28	20		60	64	28		0.738508	0.345564		0.659548	0.722319	0.545154		15.2878	9.60702		15.381	11.3049	11.7447
AcG-03x_m67_002	acR-04f_m67_001		GMA-03f_m67_002	LiG-03f_m67_003	LiR-03f_m67_003		20	100		76	28	16		0.500289	1.09259		0.95444	0.661943	0.565047		7.291	21.4557		28.2699	10.6926	10.1859
AcG-03x_m67_002	acR-04f_m67_001		GMA-03f_m67_002	LiG-03f_m67_003	LiR-03f_m67_003		96	268		16	136	24		0.818042	0.940296		0.337452	1.21213	0.504908		18.0855	21.4636		9.96021	18.0902	9.71184
AcG-03x_m67_002	acR-04f_m67_001		GMA-03f_m67_002	LiG-03f_m67_003	LiR-03f_m67_003		24	16		36	148	28		0.301075	0.382473		0.37817	1.06045	0.647411		10.1502	12.5065		12.7059	17.8705	10.6244
AcG-03x_m67_002	acR-04f_m67_001		GMA-03f_m67_002	LiG-03f_m67_003	LiR-03f_m67_003		20	20		16	60	68		0.278604	0.38953		0.424326	1.16917	0.944291		9.81603	15.2814		11.9371	13.1285	40.9048
AcG-03x_m67_002	acR-04f_m67_001		GMA-03f_m67_002	LiG-03f_m67_003	LiR-03f_m67_003		72	36		76	20	16		0.880942	0.639896		1.13548	0.654179	0.205724		14.4468	11.3866		25.5936	12.7059	10.5662
AcG-03x_m67_002	acR-04f_m67_001		GMA-03f_m67_002	LiG-03f_m67_003	LiR-03f_m67_003		20	120		36	40	272		0.191511	1.22897		0.466758	0.959401	1.22937		14.9195	16.3441		14.9869	14.9791	17.6209
AcG-03x_m67_002	acR-04f_m67_001		GMA-03f_m67_002	LiG-03f_m67_003	LiR-03f_m67_003		36	20		16	20	44		0.395317	0.528974		0.130307	0.621122	0.376041		13.1005	7.80032		11.5221	9.85286	11.6493
AcG-03x_m67_002	acR-04f_m67_001		GMA-03f_m67_002	LiG-03f_m67_003	LiR-03f_m67_003		112	16		68	48	28		0.655523	0.243119		0.558555	1.04749	0.763477		15.9779	9.77043		13.001	17.0119	11.5553
AcG-03x_m67_002	acR-04f_m67_001		GMA-03f_m67_002	LiG-03f_m67_003	LiR-03f_m67_003		60	20		280	140	88		0.925106	0.425614		1.76279	0.92166	0.954241		15.9484	11.9979		31.8522	17.1244	12.3377
AcG-03x_m67_002	acR-04f_m67_001		GMA-03f_m67_002	LiG-03f_m67_003	LiR-03f_m67_003		20	20		56	36	44		0.128548	0.381716		0.568516	0.484096	0.716347		11.2384	9.6626		15.2795	13.6871	19.043
AcG-03x_m67_002	acR-04f_m67_001		GMA-03f_m67_002	LiG-03f_m67_003	LiR-03f_m67_003		72	32		20	16	28		0.829475	0.897027		0.113375	0.630987	0.393843		17.4272	14.4942		10.4692	16.4796	10.7434
AcG-03x_m67_002	acR-04f_m67_001		GMA-03f_m67_002	LiG-03f_m67_003	LiR-03f_m67_003		24	48		24	20	84		0.347533	0.608985		0.456935	0.375178	0.527188		11.5723	10.9941		10.7069	12.9994	23.2139
AcG-03x_m67_002	acR-04f_m67_001		GMA-03f_m67_002	LiG-03f_m67_003	LiR-03f_m67_003		20	36		36	20	44		0.591289	0.71167		0.560163	0.228772	0.732063		14.0041	8.8536		19.8695	15.9946	14.3328
AcG-03x_m67_002	acR-04f_m67_001		GMA-03f_m67_002	LiG-03f_m67_003	LiR-03f_m67_003		28	24		16	84	28		0.315619	0.300146		0.518059	1.48173	0.609953		13.8861	8.39779		11.4556	33.7459	13.3273
AcG-03x_m67_002	acR-04f_m67_001		GMA-03f_m67_002	LiG-03f_m67_003	LiR-03f_m67_003		24	72		16	72	64		0.323572	1.22528		0.688935	1.14597	0.935043		10.6349	11.7762		15.6352	14.7916	24.4807
AcG-03x_m67_002	acR-04f_m67_001		GMA-03f_m67_002	LiG-04f_m67_001	LiR-03f_m67_003		76	40		16	16	24		0.787657	0.53539		0.269048	0.588354	0.926332		19.6999	13.3532		13.6523	10.6388	11.582
AcG-03x_m67_002	acR-04f_m67_001		GMA-03f_m67_002	LiG-04f_m67_001	LiR-03f_m67_003		16	24		20	32	92		0.266262	0.350036		0.63241	0.650888	1.03933		13.6194	9.53599		15.7509	10.6277	17.0394
AcG-03x_m67_002	acR-04f_m67_001		GMA-03f_m67_002	LiG-04f_m67_001	LiR-03f_m67_003		52	48		16	36	48		0.573931	0.523887		0.391853	0.549449	0.387154		13.1083	18.3653		11.8965	9.9374	10.4271
AcG-03x_m67_002	acR-04f_m67_001		GMA-03f_m67_003	LiG-04f_m67_001	LiR-03f_m67_003		20	24		184	24	72		0.127629	0.70004		1.5341	0.49632	1.21255		11.1751	9.97872		27.4094	10.2886	20.3494
AcG-03x_m67_002	acR-04f_m67_001		GMA-03f_m67_003	LiG-04f_m67_001	LiR-03f_m67_003		196	28		52	16	24		0.761778	0.692278		0.667331	0.483014	0.543567		16.9136	9.51204		13.0277	10.7213	11.4265
AcG-03x_m67_002	acR-04f_m67_001		GMA-03f_m67_003	LiG-04f_m67_001	LiR-03f_m67_003		56	56		20	24	104		0.598308	0.924433		0.475941	0.139666	0.866409		11.7849	14.0716		11.8665	9.94191	17.6497
AcG-03x_m67_002	acR-04f_m67_001		GMA-03f_m67_003	LiG-04f_m67_001	LiR-03f_m67_003		16	32		60	48	44		0.187183	0.870851		1.23677	0.958785	0.770835		11.2439	15.9131		16.297	12.916	14.1545
AcG-03x_m67_002	acR-04f_m67_001		GMA-03f_m67_003	LiG-04f_m67_001	LiR-03f_m67_003		24	32		84	20	28		0.385402	0.79214		1.19897	0.567122	0.684022		12.6612	10.4389		16.8918	10.8515	14.688
AcG-03x_m67_002	acR-04f_m67_001		GMA-03f_m67_003	LiG-04f_m67_001	LiR-03f_m67_003		20	48		60	28	76		0.304367	0.881113		1.12202	0.595353	0.964865		18.3605	11.3339		13.7136	11.526	20.7908
AcG-03x_m67_002	acR-04f_m67_001		GMA-03f_m67_003	LiG-04f_m67_001	LiR-03f_m67_003		28	52		52	16	52		0.603011	0.825711		0.950184	0.184699	1.10987		14.0901	11.1983		16.5195	7.96434	18.8042
AcG-03x_m67_002	acR-04f_m67_001		GMA-03f_m67_003	LiG-04f_m67_001	LiR-03f_m67_003		32	104		196	20	52		0.613248	0.998648		1.34001	0.710529	0.604443		19.8179	22.6174		20.4732	12.7684	12.4989
AcG-03x_m67_002	acR-04f_m67_001		GMA-03f_m67_003	LiG-04f_m67_001	LiR-03f_m67_003		20	40		24	52	64		1.0275	0.662317		0.463377	0.531379	0.825595		16.2743	10.7783		8.91225	17.2016	15.9184
AcG-03x_m67_002	acR-04f_m67_001		GMA-03f_m67_003	LiG-04f_m67_001	LiR-03f_m67_003		16	40		44	40	124		0.257874	0.5205		0.481654	0.760925	0.882397		10.3862	17.4921		12.8698	14.3909	14.0533
AcG-03x_m67_002	acR-04f_m67_001		GMA-03f_m67_003	LiG-04f_m67_001	LiR-03f_m67_003		16	52		16	52	28		0.389453	0.5207		0.388436	0.740191	0.586774		13.4099	12.1057		9.35125	13.154	18.9573
AcG-03x_m67_002	acR-04f_m67_001		GMA-03f_m67_003	LiG-04f_m67_001	LiR-03f_m67_003		20	28		144	56	72		0.363252	0.390379		1.35154	0.926925	0.691225		9.39742	13.5141		21.7087	19.2567	12.6367
AcG-03x_m67_002	acR-04f_m67_001		GMA-03f_m67_003	LiG-04f_m67_001	LiR-03f_m67_003		16	24		20	20	80		0.352096	0.588597		0.330367	0.473448	1.23647		9.00094	9.50063		10.1829	13.2751	18.9201
AcG-03x_m67_002	acR-04f_m67_001		GMA-03f_m67_003	LiG-04f_m67_001	LiR-03f_m67_003		28	72		20	32	52		0.511631	1.03194		0.726127	0.503006	0.655914		10.3403	13.9047		12.5767	12.919	13.6622
AcG-03x_m67_003	acR-04f_m67_001		GMA-03f_m67_003	LiG-04f_m67_001	LiR-03f_m67_003		128	40		20	20	92		0.700301	0.567425		0.405076	0.915824	0.666846		15.7394	12.4748		9.63131	9.76455	18.1056
AcG-03x_m67_003	acR-04f_m67_001		GMA-03f_m67_003	LiG-04f_m67_001	LiR-03f_m67_003		144	56		76	40	20		1.14051	0.634654		0.791742	1.00198	0.434763		21.7689	18.9615		15.5767	14.3129	11.4131
AcG-03x_m67_003	acR-04f_m67_001		GMA-03f_m67_003	LiG-04f_m67_001	LiR-03f_m67_003		24	16		40	128	272		0.293817	0.391861		0.427958	1.03742	1.42217		10.6337	10.5621		11.6645	15.6415	25.4735
AcG-03x_m67_003	acR-04f_m67_001		GMA-03f_m67_003	LiG-04f_m67_001	LiR-03f_m67_003		140	28		20	20	28		0.899563	0.789476		0.14965	0.518223	0.33081		14.828	12.367		11.296	10.3225	10.6394
AcG-03x_m67_003	acR-04f_m67_001		GMA-03f_m67_003	LiG-04f_m67_001	LiR-03f_m67_003		32	28		148	20	20		0.398055	0.795601		1.38486	0.347859	0.462741		11.7257	9.70675		15.8495	11.0579	11.0525
AcG-03x_m67_003	acR-04f_m67_002		GMA-03f_m67_003	LiG-04f_m67_001	LiR-03f_m67_003		124	44		40	36	64		0.931425	1.00012		1.15804	1.1434	0.835961		17.2231	15.6467		20.4151	17.2047	17.8046
AcG-03x_m67_003	acR-04f_m67_002		GMA-03f_m67_003	LiG-04f_m67_001	LiR-03f_m67_003		28	16		48	16	16		0.609631	0.743205		1.50252	0.357225	0.277386		12.4809	14.9964		13.2929	9.97298	11.472
AcG-03x_m67_003	acR-04f_m67_002		GMA-03f_m67_003	LiG-04f_m67_001	LiR-03f_m67_003		16	40		16	64	32		0.25357	0.660556		0.339121	0.8811	0.602206		10.4236	12.5348		13.624	15.5444	12.6574
AcG-03x_m67_003	acR-04f_m67_002		GMA-03f_m67_003	LiG-04f_m67_001	LiR-03f_m67_003		36	20		32	16	24		0.491874	0.431119		0.673347	0.137564	0.435265		15.7567	10.6655		15.4846	10.2078	10.7445
AcG-03x_m67_003	acR-04f_m67_002		GMA-03f_m67_003	LiG-04f_m67_001	LiR-03f_m67_003		24	24		48	16	36		0.460673	0.676337		1.02821	0.467018	0.75607		12.278	8.78653		16.7054	9.4882	13.7899
AcG-03x_m67_003	acR-04f_m67_002		GMA-03f_m67_003	LiG-04f_m67_001	LiR-03f_m67_003		36	164		28	32	40		0.687768	1.07183		0.42237	0.67563	0.592263		13.3329	30.5926		11.8966	13.4446	13.6043
AcG-03x_m67_003	acR-04f_m67_002		GMA-03f_m67_003	LiG-04f_m67_001	LiR-03f_m67_003		28	68		28	20	20		0.223836	1.09648		0.481604	0.667181	0.26244		12.7222	17.6266		12.8209	11.2585	10.2018
AcG-03x_m67_003	acR-04f_m67_002		GMA-03f_m67_003	LiG-04f_m67_001	LiR-03f_m67_003		36	92		16	72	32		0.536375	1.37278		0.676827	1.08831	0.472053		13.9181	18.642		12.4298	14.2556	13.5052
AcG-03x_m67_003	acR-04f_m67_002		GMA-03f_m67_003	LiG-04f_m67_001	LiR-03f_m67_003		20	20		52	20	40		0.166759	0.469777		0.946166	0.484487	0.89058		11.2413	14.8141		14.8754	14.396	31.5078
AcG-03x_m67_003	acR-04f_m67_002		GMA-03f_m67_003	LiG-04f_m67_001	LiR-03f_m67_003		20	52		16	32	16		0.323386	0.696234		0.185696	0.794429	0.447993		12.9474	12.2338		11.7655	12.1876	13.8594
AcG-03x_m67_003	acR-04f_m67_002		GMA-03f_m67_003	LiG-04f_m67_001	LiR-03f_m67_003		28	40		16	16	16		0.467772	0.780779		0.820205	0.237132	0.433328		13.4661	8.96713		9.43527	10.1946	18.8557
AcG-03x_m67_003	acR-04f_m67_002		GMA-03f_m67_003	LiG-04f_m67_001	LiR-03f_m67_003		16	96		48	48	24		0.316211	1.2059		0.789125	1.26548	0.339858		12.7811	20.5331		15.7546	22.3877	11.6364
AcG-03x_m67_003	acR-04f_m67_002		GMA-03f_m67_003	LiG-04f_m67_001	LiR-03f_m67_003		16	20		76	56	352		0.37642	0.493651		0.997796	0.831724	0.712585		12.5314	8.63971		13.7355	13.8961	14.5873
AcG-03x_m67_003	acR-04f_m67_002		GMA-03f_m67_003	LiG-04f_m67_001	LiR-03f_m67_003		20	44		32	16	120		0.35781	0.756031		0.650765	0.380162	1.2238		12.673	13.6099		16.054	11.8839	21.3043
AcG-03x_m67_003	acR-04f_m67_002		GMA-03f_m67_003	LiG-04f_m67_001	LiR-03f_m67_003		20	84		44	36	84		0.394265	1.25139		0.614403	0.876955	0.777744		13.684	20.8514		14.6296	14.0101	17.0837
AcG-03x_m67_003	acR-04f_m67_002		GMA-03f_m67_003	LiG-04f_m67_001	LiR-04f_m67_001		28	40		80	16	32		0.333625	0.886744		0.848132	0.523791	0.702564		13.3508	12.0874		24.4699	12.7618	9.6778
AcG-03x_m67_003	acR-04f_m67_002		GMA-03f_m67_003	LiG-04f_m67_001	LiR-04f_m67_001		80	44		80	88	52		0.898667	0.975613		0.762883	1.18355	0.769686		16.9406	12.0748		18.4143	24.3357	11.539
AcG-03x_m67_003	acR-04f_m67_002		GMA-03f_m67_003	LiG-04f_m67_001	LiR-04f_m67_001		16	20		44	68	16		0.194593	0.333686		1.16111	0.588325	0.27994		12.1255	8.8702		20.6367	11.6991	8.8088
AcG-03x_m67_003	acR-04f_m67_002		GMA-03f_m67_003	LiG-04f_m67_001	LiR-04f_m67_001		44	156		28	16	40		0.472062	0.950828		0.434594	0.21379	0.447031		14.6507	14.8978		20.3718	10.6873	10.7877
AcG-03x_m67_003	acR-04f_m67_002		GMA-03f_m67_003	LiG-04f_m67_001	LiR-04f_m67_001		32	80		20	188	36		0.34162	0.730594		0.447463	1.21514	0.79992		15.3485	11.7159		10.2213	17.3801	11.3266
AcG-03x_m67_003	acR-04f_m67_002		GMA-03f_m67_003	LiG-04f_m67_001	LiR-04f_m67_001		24	20		44	204	68		0.207288	0.372171		0.82593	1.09462	0.55613		14.8695	13.1718		16.8735	24.3503	13.7874
AcG-03x_m67_003	acR-04f_m67_002		GMA-03f_m67_003	LiG-04f_m67_002	LiR-04f_m67_001		28	32		16	56	128		0.207001	0.720546		0.479498	0.789852	1.14773		12.4071	12.9042		11.8539	10.4887	13.9964
AcG-03x_m67_003	acR-04f_m67_002		GMA-03f_m67_003	LiG-04f_m67_002	LiR-04f_m67_001		32	60		52	36	312		0.328968	0.745403		0.954716	0.960902	0.91172		16.1361	10.6492		19.1712	13.8728	14.6945
AcG-03x_m67_003	acR-04f_m67_002		GMA-03f_m67_003	LiG-04f_m67_002	LiR-04f_m67_001		32	16		32	24	16		0.397147	0.453932		0.498936	0.413862	0.144197		13.2358	8.36968		21.7883	11.2851	8.4361
AcG-03x_m67_003	acR-04f_m67_002		GMA-03f_m67_003	LiG-04f_m67_002	LiR-04f_m67_001		16	28		20	20	20		0.246939	0.394353		0.318787	0.264117	0.238421		14.1143	10.5912		12.8543	9.24541	8.92939
AcG-03x_m67_003	acR-04f_m67_002		GMA-03f_m67_003	LiG-04f_m67_002	LiR-04f_m67_001		24	44		16	32	40		0.571768	0.757722		0.421066	0.775305	0.626818		19.6759	12.3797		13.4551	10.7345	9.71858
AcG-03x_m67_003	acR-04f_m67_002		GMA-03f_m67_003	LiG-04f_m67_002	LiR-04f_m67_001		100	44		24	24	104		0.677813	0.928823		0.39278	0.750005	0.812293		20.2474	11.4345		15.1671	9.2655	13.6058
AcG-03x_m67_003	acR-04f_m67_002		GMA-03f_m67_003	LiG-04f_m67_002	LiR-04f_m67_001		100	92		24	28	124		0.811871	1.30619		0.473613	1.02043	0.941726		14.2143	16.4712		15.5781	11.0222	12.8999
acG-05f_m67_001	acR-04f_m67_002		GMA-03f_m67_003	LiG-04f_m67_002	LiR-04f_m67_001		64	88		48	120	20		0.900165	0.758397		1.46729	1.00801	0.612732		10.2415	14.0871		11.0489	14.4124	9.73224
acG-05f_m67_001	acR-04f_m67_002		GMA-03f_m67_003	LiG-04f_m67_002	LiR-04f_m67_001		28	16		20	20	48		0.285051	1.63253		0.531118	0.62145	0.689844		8.66894	11.7565		10.9779	11.6227	12.1292
acG-05f_m67_001	acR-04f_m67_002		GMA-03f_m67_003	LiG-04f_m67_002	LiR-04f_m67_001		28	28		40	16	68		0.759304	0.46562		0.839752	0.494741	0.825681		10.9906	12.4169		19.2347	12.034	12.3531
acG-05f_m67_001	acR-04f_m67_002		GMA-03f_m67_003	LiG-04f_m67_002	LiR-04f_m67_001		84	20		108	32	68		0.689081	0.545963		1.35062	0.431541	0.715761		19.7252	9.91711		12.3878	13.1531	13.4272
acG-05f_m67_001	acR-04f_m67_002		GMA-04f_m67_001	LiG-04f_m67_002	LiR-04f_m67_001		16	28		128	32	16		0.231761	0.454495		1.12902	0.891127	0.276288		10.4873	9.92774		17.7967	12.4528	8.90939
acG-05f_m67_001	acR-04f_m67_002		GMA-04f_m67_001	LiG-04f_m67_002	LiR-04f_m67_001		24	80		24	172	52		0.506997	0.957035		0.442457	1.33797	0.580215		12.2967	14.7321		10.9672	21.863	13.1196
acG-05f_m67_001	acR-04f_m67_002		GMA-04f_m67_001	LiG-04f_m67_002	LiR-04f_m67_001		24	60		108	24	64		0.177656	0.939934		0.940253	0.989903	0.574391		10.314	13.0055		11.5023	20.7288	15.4489
acG-05f_m67_001	acR-04f_m67_002		GMA-04f_m67_001	LiG-04f_m67_002	LiR-04f_m67_001		72	132		56	24	20		0.928045	1.26883		0.319791	0.685306	0.632875		15.8271	19.5218		9.71568	12.5703	9.4713
acG-05f_m67_001	acR-04f_m67_002		GMA-04f_m67_001	LiG-04f_m67_002	LiR-04f_m67_001		20	16		20	28	200		0.222633	0.152886		0.138906	0.439888	1.00023		9.62532	13.4289		12.219	12.1368	14.1519
acG-05f_m67_001	acR-04f_m67_002		GMA-04f_m67_001	LiG-04f_m67_002	LiR-04f_m67_001		40	28		24	40	84		0.414519	0.470895		0.326204	0.602976	0.817569		10.1446	10.3906		8.77768	10.5754	13.7148
acG-05f_m67_001	acR-04f_m67_002		GMA-04f_m67_001	LiG-04f_m67_002	LiR-04f_m67_001		28	20		24	28	120		0.539389	0.505427		0.21495	0.651886	0.753581		12.2786	10.9685		10.2513	15.1138	14.8989
acG-05f_m67_001	acR-04f_m67_002		GMA-04f_m67_001	LiG-04f_m67_002	LiR-04f_m67_001		36	16		36	120	48		0.597366	0.793979		0.592903	1.23769	0.839606		18.3434	8.09498		14.1509	17.9096	11.5116
acG-05f_m67_001	acR-04f_m67_002		GMA-04f_m67_001	LiG-04f_m67_002	LiR-04f_m67_001		96	40		16	64	36		0.63096	1.44171		0.401508	1.23593	0.564178		12.7315	10.4192		9.4873	16.49	11.4291
acG-05f_m67_001	acR-04f_m67_002		GMA-04f_m67_001	LiG-04f_m67_002	LiR-04f_m67_001		20	40		60	48	40		0.718894	0.796113		0.562492	0.822724	0.515897		17.3688	11.565		11.6519	15.7303	12.6056
acG-05f_m67_001	acR-04f_m67_002		GMA-04f_m67_001	LiG-04f_m67_002	LiR-04f_m67_001		36	44		16	72	20		0.316597	1.02026		0.280399	1.00087	0.358774		11.5565	13.1318		7.83231	23.4066	9.52565
acG-05f_m67_001	acR-04f_m67_002		GMA-04f_m67_001	LiG-04f_m67_002	LiR-04f_m67_001		20	36		52	24	128		0.21916	1.37323		0.914103	0.566043	0.505748		10.4948	19.8527		17.8202	9.42198	12.3927
acG-05f_m67_001	acR-04f_m67_002		GMA-04f_m67_001	LiG-04f_m67_002	LiR-04f_m67_001		20	96		28	20	28		0.225701	0.931737		0.330601	0.538275	0.464086		10.6119	15.8202		8.90554	10.5113	11.4189
acG-05f_m67_001	acR-04f_m67_002		GMA-04f_m67_001	LiG-04f_m67_002	LiR-04f_m67_001		140	16		28	64	36		0.708743	0.633632		0.391358	0.766609	0.373684		36.4704	11.7335		10.2804	18.3463	10.2977
acG-05f_m67_001	acR-04f_m67_002		GMA-04f_m67_001	LiG-04f_m67_002	LiR-04f_m67_001		28	40		36	16	140		0.657879	0.857738		0.611373	0.596342	1.15457		15.9869	12.1255		13.095	10.617	16.7931
acG-05f_m67_001	acR-04f_m67_002		GMA-04f_m67_001	LiG-04f_m67_002	LiR-04f_m67_001		20	20		120	112	40		0.445455	0.65494		0.738084	1.12009	0.946891		12.2162	11.3718		12.6382	27.7075	14.037
acG-05f_m67_001	acR-04f_m67_002		GMA-04f_m67_001	LiG-04f_m67_002	LiR-04f_m67_001		36	16		16	148	60		0.719332	0.644338		0.177129	1.52094	0.778747		13.5774	9.33487		8.85769	22.007	13.2446
acG-05f_m67_001	acR-04f_m67_002		GMA-04f_m67_001	LiG-04f_m67_002	LiR-04f_m67_001		44	64		20	44	20		0.638244	0.738927		0.163887	0.94379	0.622303		11.7039	18.3136		9.54268	12.7125	12.7181
acG-05f_m67_001	acR-04f_m67_002		GMA-04f_m67_001	LiG-04f_m67_002	LiR-04f_m67_001		24	40		20	28	44		0.504065	0.39364		0.235276	0.585063	0.508615		11.0118	10.8656		8.9522	13.1588	12.7694
acG-05f_m67_001	acR-04f_m67_002		GMA-04f_m67_001		LiR-04f_m67_001		16	32		104		60		0.073772	0.612131		0.739253		0.473329		11.4212	12.8965		11.8532		13.7862
acG-05f_m67_001	acR-04f_m67_002		GMA-04f_m67_001		LiR-04f_m67_001		40	16		32		56		0.853989	0.514066		0.343485		0.660739		19.2353	10.3292		10.0943		11.8605
acG-05f_m67_001	acR-04f_m67_002		GMA-04f_m67_001		LiR-04f_m67_001		48	16		32		64		0.696223	0.381258		0.500134		0.676223		16.407	9.66603		9.99229		13.4074
acG-05f_m67_001	acR-04f_m67_002		GMA-04f_m67_001		LiR-04f_m67_001		24	32		288		28		0.397486	0.413148		0.951811		0.373739		14.0219	10.9431		20.4534		10.4497
acG-05f_m67_001	acR-04f_m67_002		GMA-04f_m67_001		LiR-04f_m67_001		56	16		92		64		0.67122	0.322339		1.1609		0.767634		13.6984	10.5559		15.8057		12.5783
acG-05f_m67_001	acR-04f_m67_002		GMA-04f_m67_001		LiR-04f_m67_001		32	32		16		40		0.515684	0.473758		0.31008		0.722524		15.9132	13.7121		8.62599		12.6925
acG-05f_m67_001	acR-04f_m67_002		GMA-04f_m67_001		LiR-04f_m67_001		80	24		20		20		1.11596	0.692679		0.388485		0.617186		16.1373	8.93223		9.32052		9.98004
acG-05f_m67_001	acR-04f_m67_002		GMA-04f_m67_001		LiR-04f_m67_001		16	16		52		32		0.170143	0.730392		0.671406		0.397978		11.058	10.4239		14.2212		13.2686
acG-05f_m67_001	acR-04f_m67_002		GMA-04f_m67_001		LiR-04f_m67_001		24	32		16		44		0.420299	0.847251		0.610196		0.576811		17.8923	7.91719		9.61167		11.3284
acG-05f_m67_001	acR-04f_m67_002		GMA-04f_m67_001		LiR-04f_m67_001		40	64		84		16		0.593629	0.850547		0.824565		0.179271		21.6641	12.7794		13.5864		10.5452
acG-05f_m67_001	acR-04f_m67_002		GMA-04f_m67_001		LiR-04f_m67_001		36	20		24		20		1.16961	0.533746		0.367407		0.516725		15.6194	13.106		10.8962		11.7544
acG-05f_m67_001	acR-04f_m67_002		GMA-04f_m67_001		LiR-04f_m67_001		20	56		76		76		0.479515	1.49426		1.11205		0.676574		13.558	15.3117		15.8726		11.9068
acG-05f_m67_001	acR-04f_m67_002		GMA-04f_m67_001		LiR-04f_m67_001		28	16		16		16		0.164299	0.218082		0.228187		0.18755		17.0384	9.78924		8.19142		7.94166
acG-05f_m67_001	acR-04f_m67_002		GMA-04f_m67_001				28	36		40				0.753779	0.575307		0.478429				19.3153	10.2833		11.1003
acG-05f_m67_001	acR-04f_m67_002		GMA-04f_m67_001				24	16		104				0.203295	0.325724		0.809852				14.8837	11.0307		11.7641
acG-05f_m67_001	acR-04f_m67_002		GMA-04f_m67_001				16	36		32				0.15754	0.871926		0.619559				10.9939	24.1517		11.5721
acG-05f_m67_001	acR-04f_m67_002		GMA-04f_m67_001				16	36		28				0.447602	0.720527		0.682676				14.4617	16.4801		12.1213
acG-05f_m67_001	acR-04f_m67_002		GMA-04f_m67_001				156	16		48				0.955431	0.262907		0.407092				14.6409	10.4845		11.6281
acG-05f_m67_001	acR-04f_m67_002		GMA-04f_m67_001				112	48		16				1.17351	1.31042		0.376075				14.6277	21.5878		8.88399
acG-05f_m67_001	acR-04f_m67_002		GMA-04f_m67_001				48	44		20				1.3038	0.732757		0.201172				31.7272	10.0648		9.97723
acG-05f_m67_001	acR-04f_m67_002		GMA-04f_m67_001				16	20		28				0.543636	0.320574		0.491245				13.1356	10.5876		13.3142
acG-05f_m67_001	acR-04f_m67_002		GMA-04f_m67_001				20	32		24				0.258213	0.519975		0.61896				8.38017	15.8918		12.153
acG-05f_m67_002	acR-04f_m67_002		GMA-04f_m67_001				76	20		24				0.655083	0.332625		0.451952				8.91102	11.0513		11.4132
acG-05f_m67_002	acR-04f_m67_002		GMA-04f_m67_001				36	24		24				1.09554	0.626276		0.427885				18.4534	8.74985		11.1025
acG-05f_m67_002	acR-04f_m67_002		GMA-04f_m67_001				24	16		24				0.352716	0.517679		0.524271				15.7676	13.1551		12.4801
acG-05f_m67_002	acR-04f_m67_002		GMA-04f_m67_001				32	24		148				0.63359	0.593239		0.73375				14.7452	13.203		11.8142
acG-05f_m67_002	acR-04f_m67_002		GMA-04f_m67_001				20	28		172				0.295455	0.64701		0.798146				13.9716	12.1871		11.924
acG-05f_m67_002	acR-04f_m67_002		GMA-04f_m67_001				32	16		164				0.446769	0.380599		0.980139				12.9515	8.27975		12.8879
acG-05f_m67_002	acR-04f_m67_002		GMA-04f_m67_001				24	20		36				0.78567	0.489464		0.598709				14.8207	12.1863		10.0459
acG-05f_m67_002	acR-04f_m67_003		GMA-04f_m67_001				20	124		116				0.513898	0.939586		1.38632				14.2242	15.9875		24.8673
acG-05f_m67_002	acR-04f_m67_003		GMA-04f_m67_002				20	28		28				0.263264	0.44871		0.340946				13.4032	13.5603		9.31996
acG-05f_m67_002	acR-04f_m67_003		GMA-04f_m67_002				64	100		80				1.20729	1.19314		1.41405				30.1742	15.7972		15.6137
acG-05f_m67_002	acR-04f_m67_003		GMA-04f_m67_002				248	40		36				0.948286	0.566592		0.924394				17.3058	13.1466		15.0986
acG-05f_m67_002	acR-04f_m67_003		GMA-04f_m67_002				16	48		24				0.323066	0.798761		0.517183				12.5082	16.2338		9.65784
acG-05f_m67_002	acR-04f_m67_003		GMA-04f_m67_002				48	72		16				0.72803	0.684532		0.456349				14.786	11.2789		9.32468
acG-05f_m67_002	acR-04f_m67_003		GMA-04f_m67_002				28	28		60				0.726136	0.950184		0.670917				15.9496	13.7823		10.2761
acG-05f_m67_002	acR-04f_m67_003		GMA-04f_m67_002				36	40		56				0.918112	1.04158		0.746087				16.6504	13.7375		12.1547
acG-05f_m67_002	acR-04f_m67_003		GMA-04f_m67_002				52	44		36				1.01548	0.848043		0.367003				19.0923	9.28627		12.881
acG-05f_m67_002	acR-04f_m67_003		GMA-04f_m67_002				28	164		80				0.767739	1.09262		0.689925				11.1571	12.9296		11.7713
acG-05f_m67_002	acR-04f_m67_003		GMA-04f_m67_002				164	216		40				1.35025	1.38366		0.834074				21.1145	21.55		14.99
acG-05f_m67_002	acR-04f_m67_003		GMA-04f_m67_002				68	28		88				1.06904	0.80606		0.782972				18.187	11.9693		16.2576
acG-05f_m67_002	acR-04f_m67_003		GMA-04f_m67_002				48	44		16				1.09816	0.744238		0.36256				34.4034	13.0078		10.1826
acG-05f_m67_002	acR-04f_m67_003		GMA-04f_m67_002				44	196		48				0.421017	1.11462		0.62121				9.91226	18.8679		9.81161
acG-05f_m67_002	acR-04f_m67_003		GMA-04f_m67_002				72	96		44				0.549997	1.6254		0.516533				19.2083	13.9969		8.89079
acG-05f_m67_002	acR-04f_m67_003		GMA-04f_m67_002				24	48		16				0.66033	0.613114		0.345052				11.3066	10.6502		9.48198
acG-05f_m67_002	acR-04f_m67_003		GMA-04f_m67_002				36	40		48				0.31781	0.519556		0.578346				10.8732	11.3888		11.022
acG-05f_m67_002	acR-04f_m67_003		GMA-04f_m67_002				32	40		32				0.624216	1.10351		1.04025				16.8515	13.9332		15.5175
acG-05f_m67_002	acR-04f_m67_003		GMA-04f_m67_002				80	36		24				1.02403	0.526445		0.648245				15.7904	11.0201		11.6768
acG-05f_m67_002	acR-04f_m67_003		GMA-04f_m67_002				72	20		16				0.46228	0.544227		0.603764				11.9145	9.90924		8.43267
acG-05f_m67_002	acR-04f_m67_003		GMA-04f_m67_002				40	24		44				0.650232	0.405491		0.555056				12.9221	9.28376		11.4069
acG-05f_m67_002	acR-04f_m67_003		GMA-04f_m67_002				96	128		52				0.659733	1.08991		1.35214				18.3279	14.2137		20.7233
acG-05f_m67_002	acR-04f_m67_003		GMA-04f_m67_002				100	28		36				1.23452	0.652897		0.951792				21.8983	11.9117		15.1865
acG-05f_m67_002	acR-04f_m67_003		GMA-04f_m67_002				52	20		124				0.943133	0.667509		0.65431				11.6464	10.9915		17.41
acG-05f_m67_002	acR-04f_m67_003		GMA-04f_m67_002				16	24		16				0.599499	0.80223		0.932812				11.1649	11.9502		8.47428
acG-05f_m67_002	acR-04f_m67_003		GMA-04f_m67_002				24	160		16				0.784625	0.992694		0.354257				10.9569	14.841		8.65855
acG-05f_m67_002	acR-04f_m67_003		GMA-04f_m67_002				16	56		20				0.639725	1.04526		0.416215				11.0133	14.5658		10.248
acG-05f_m67_002	acR-04f_m67_003		GMA-04f_m67_002				32	64		16				0.513908	0.849385		0.497334				14.3085	17.241		11.009
acG-05f_m67_002	acR-04f_m67_003		GMA-04f_m67_002				28	88		20				0.572248	1.15497		0.643138				12.7865	18.5106		12.0596
acG-05f_m67_002	acR-04f_m67_003		GMA-04f_m67_002				60	32		28				1.10432	0.772599		0.425508				14.6474	9.27115		9.98918
acG-05f_m67_002	acR-04f_m67_003		GMA-04f_m67_002				16	124		36				0.516032	0.795598		1.03113				13.4324	12.293		13.3762
acG-05f_m67_002	acR-04f_m67_003		GMA-04f_m67_002				24	28		76				0.592304	0.498577		0.734596				12.1985	12.0735		16.2272
acG-05f_m67_002	acR-04f_m67_003		GMA-04f_m67_002				40	88		100				0.844259	1.18277		1.08549				20.0594	13.1701		14.4464
acG-05f_m67_002	acR-04f_m67_003		GMA-04f_m67_003				132	60		40				0.623497	0.93769		0.500919				25.0852	15.4572		15.8175
acG-05f_m67_002	acR-04f_m67_003		GMA-04f_m67_003				32	44		36				0.458015	0.544179		0.418052				13.0805	11.9856		11.9563
acG-05f_m67_002	acR-04f_m67_003		GMA-04f_m67_003				32	84		140				0.57526	1.32807		0.896198				12.5276	21.9754		15.2826
acG-05f_m67_002	acR-04f_m67_003		GMA-04f_m67_003				48	36		84				0.563883	0.552509		1.0215				13.2101	12.0777		20.1234
acG-05f_m67_002	acR-04f_m67_003		GMA-04f_m67_003				52	16		24				0.559257	0.359499		0.297251				11.0586	7.53302		10.8181
acG-05f_m67_002	acR-04f_m67_003		GMA-04f_m67_003				24	16		84				1.20772	0.442716		1.06347				15.3194	12.5104		14.2123
acG-05f_m67_002	acR-04f_m67_003		GMA-04f_m67_003				20	40		68				0.227682	0.561368		0.673235				11.9426	11.5952		14.0656
acG-05f_m67_002	acR-04f_m67_003		GMA-04f_m67_003				28	56		148				0.535662	0.657591		0.722153				13.6239	11.3001		12.8182
acG-05f_m67_002	acR-04f_m67_003		GMA-04f_m67_003				36	72		32				0.686999	0.751538		0.510895				12.2653	19.9808		12.2156
acG-05f_m67_002	acR-04f_m67_003		GMA-04f_m67_003				20	36		60				0.420992	1.0572		0.696646				10.1012	9.65164		14.6423
acG-05f_m67_002	acR-04f_m67_003		GMA-04f_m67_003				64	60		60				1.13272	1.08759		0.87578				20.3239	18.8006		12.0279
acG-05f_m67_002	acR-04f_m67_003		GMA-04f_m67_003				48	40		52				0.582669	0.729761		0.480489				13.8118	10.2778		12.2048
acG-05f_m67_002	acR-04f_m67_003		GMA-04f_m67_003				168	16		28				0.895893	0.664841		0.398953				16.4733	10.9424		12.4151
acG-05f_m67_002	acR-04f_m67_003		GMA-04f_m67_003				20	24		16				0.560724	0.546212		0.301433				14.0453	11.7927		10.4341
acG-05f_m67_002	acR-04f_m67_003		GMA-04f_m67_003				24	20		16				0.460813	0.799599		0.159417				10.006	12.6602		9.38123
acG-05f_m67_002	acR-04f_m67_003		GMA-04f_m67_003				16	16		16				0.368989	0.49842		0.271831				9.25237	11.5724		15.0445
acG-05f_m67_002	AcR-05f_m67_002		GMA-04f_m67_003				24	132		76				0.489929	0.994626		0.932378				11.9731	13.9978		13.569
acG-05f_m67_002	AcR-05f_m67_002		GMA-04f_m67_003				32	16		28				0.273476	0.163113		0.662594				10.6294	10.0027		12.0265
acG-05f_m67_002	AcR-05f_m67_002		GMA-04f_m67_003				92	224		52				0.970553	0.820838		0.945617				13.4617	15.7041		15.2147
acG-05f_m67_002	AcR-05f_m67_002		GMA-04f_m67_003				16	20		32				0.330767	0.609454		0.555531				11.2223	10.0661		13.5746
acG-05f_m67_002	AcR-05f_m67_002		GMA-04f_m67_003				88	44		24				0.887755	0.686725		0.509937				15.9442	11.0239		10.9732
acG-05f_m67_002	AcR-05f_m67_002		GMA-04f_m67_003				16	20		32				0.690202	0.508304		0.450388				10.1169	6.7061		12.5796
acG-05f_m67_002	AcR-05f_m67_002		GMA-04f_m67_003				24	60		16				0.307358	0.960964		0.309445				10.3446	14.8234		12.758
acG-05f_m67_002	AcR-05f_m67_002		GMA-04f_m67_003				36	20		16				0.415366	0.411919		0.830635				11.6817	9.32938		12.2181
acG-05f_m67_002	AcR-05f_m67_002		GMA-04f_m67_003				16	16		16				0.100401	0.552695		0.385925				8.9931	9.44743		10.9506
acG-05f_m67_002	AcR-05f_m67_002		GMA-04f_m67_003				76	40		24				0.609196	0.724086		0.763747				14.5684	12.1693		12.957
acG-05f_m67_002	AcR-05f_m67_002		GMA-04f_m67_003				32	36		28				0.788582	0.836101		0.713858				17.1213	11.898		15.8954
acG-05f_m67_002	AcR-05f_m67_002		GMA-04f_m67_003				92	24		16				1.01014	0.739031		0.358828				21.5997	14.8751		12.7013
acG-05f_m67_002	AcR-05f_m67_002		GMA-04f_m67_003				20	32		28				0.155176	0.528336		0.449265				9.35557	10.5715		14.4945
acG-05f_m67_002	AcR-05f_m67_002		GMA-04f_m67_003				24	28		16				0.502397	0.577341		0.249227				12.2261	10.7773		13.8636
acG-05f_m67_002	AcR-05f_m67_002		GMA-04f_m67_003				20	28		16				0.571048	0.768787		0.425086				10.2095	12.813		12.8803
acG-05f_m67_002	AcR-05f_m67_002		GMA-04f_m67_003				60	76		124				0.711644	0.640316		0.833444				19.0905	12.8323		16.2594
acG-05f_m67_002	AcR-05f_m67_002		GMA-04f_m67_003				16	16		48				0.264227	0.505279		0.645576				10.0956	9.78378		10.9643
acG-05f_m67_002	AcR-05f_m67_002		GMA-04f_m67_003				64	16		36				0.840625	0.54098		1.06104				19.0094	10.4206		18.5688
acG-05f_m67_002	AcR-05f_m67_002		GMA-04f_m67_003				24	88		96				0.435604	0.850715		0.74462				13.1502	14.2758		12.282
acG-05f_m67_002	AcR-05f_m67_002		GMA-04f_m67_003				48	124		72				0.555688	0.61836		1.17864				13.7542	13.3695		15.7528
acG-05f_m67_002	AcR-05f_m67_002		GMA-05f_m67_001				20	48		52				0.296508	0.950083		0.585501				14.2053	12.8128		12.8603
acG-05f_m67_002	AcR-05f_m67_002		GMA-05f_m67_001				88	68		36				0.907847	0.760948		0.623393				26.9098	14.293		11.6989
acG-05f_m67_002	AcR-05f_m67_002		GMA-05f_m67_001				88	132		48				0.776661	1.55609		0.608766				13.451	24.6269		10.4391
acG-05f_m67_002	AcR-05f_m67_002		GMA-05f_m67_001				32	48		20				0.437064	0.729098		0.768309				12.7038	12.2093		15.1649
acG-05f_m67_002	AcR-05f_m67_002		GMA-05f_m67_001				24	32		40				0.356924	0.687985		0.412901				11.7555	9.82088		10.5981
acG-05f_m67_002	AcR-05f_m67_002		GMA-05f_m67_001				64	40		20				0.718483	0.66843		0.371093				13.464	12.1268		9.7239
acG-05f_m67_002	AcR-05f_m67_002		GMA-05f_m67_001				28	28		20				0.384094	0.285274		0.394867				10.1966	11.2789		9.18692
acG-05f_m67_002	AcR-05f_m67_002		GMA-05f_m67_001				16	32		68				0.468544	0.544925		1.50074				13.5702	9.83689		30.8365
acG-05f_m67_002	AcR-05f_m67_002		GMA-05f_m67_001				28	40		40				0.392238	0.602807		0.830683				12.5903	10.798		14.5207
acG-05f_m67_002	AcR-05f_m67_002		GMA-05f_m67_001				60	24		76				0.735378	0.889705		0.869626				17.3257	8.8138		14.0943
acG-05f_m67_002	AcR-05f_m67_002		GMA-05f_m67_001				76	52		48				0.872469	0.573061		0.678695				16.4702	12.2852		9.45607
acG-05f_m67_002	AcR-05f_m67_002		GMA-05f_m67_001				16	32		92				0.169776	0.826225		1.4054				9.49483	13.4502		15.4239
acG-05f_m67_002	AcR-05f_m67_002		GMA-05f_m67_001				60	20		48				0.725587	0.696419		0.745475				16.5185	10.9979		11.927
acG-05f_m67_002	AcR-05f_m67_002		GMA-05f_m67_001				44	36		60				1.00146	0.410915		0.728873				17.9157	11.5089		11.8675
acG-05f_m67_002	AcR-05f_m67_002		GMA-05f_m67_001				40	16		40				0.757702	0.432743		0.699684				17.7258	10.5763		11.9046
acG-05f_m67_002	AcR-05f_m67_002		GMA-05f_m67_001				44	28		20				0.735967	0.593353		0.473152				18.377	15.0569		11.9716
acG-05f_m67_002	AcR-05f_m67_002		GMA-05f_m67_001				48	24		92				0.61958	0.343422		0.932044				15.7228	9.8284		12.2292
acG-05f_m67_002	AcR-05f_m67_002		GMA-05f_m67_001				44	16		56				0.448869	0.295233		0.71128				14.1461	10.0274		15.3889
acG-05f_m67_002	AcR-05f_m67_002		GMA-05f_m67_001				24	16		16				0.359282	0.628976		0.226535				14.6382	8.02547		9.1506
acG-05f_m67_003	AcR-05f_m67_002		GMA-05f_m67_001				68	72		24				0.721193	0.619177		0.443814				19.9463	14.442		11.7344
acG-05f_m67_003	AcR-05f_m67_002		GMA-05f_m67_001				152	144		204				1.1122	0.862724		1.51177				21.325	13.5001		20.9943
acG-05f_m67_003	AcR-05f_m67_002		GMA-05f_m67_001				76	44		56				0.875923	0.719052		0.736609				12.364	11.0379		11.0454
acG-05f_m67_003	AcR-05f_m67_002		GMA-05f_m67_001				276	16		68				0.978348	0.397462		0.659023				19.5245	15.7666		12.6484
acG-05f_m67_003	AcR-05f_m67_002		GMA-05f_m67_001				100	16		16				0.887348	0.442581		0.0920637				15.9174	9.48629		10.0447
acG-05f_m67_003	AcR-05f_m67_003		GMA-05f_m67_001				56	16		60				0.8624	0.920947		0.561035				15.0568	8.31471		13.022
acG-05f_m67_003	AcR-05f_m67_003		GMA-05f_m67_001				64	16		40				1.02894	0.240789		0.481637				14.4786	10.742		11.2036
acG-05f_m67_003	AcR-05f_m67_003		GMA-05f_m67_001				20	48		20				0.285064	0.577983		0.424882				11.3241	10.9092		11.9309
acG-05f_m67_003	AcR-05f_m67_003		GMA-05f_m67_001				16	24		24				0.283508	0.955139		0.489803				10.8133	10.5567		9.92821
acG-05f_m67_003	AcR-05f_m67_003		GMA-05f_m67_001				36	128		16				0.4122	0.97591		0.227447				10.9043	11.3309		10.4749
acG-05f_m67_003	AcR-05f_m67_003		GMA-05f_m67_001				100	36		16				0.813577	0.853351		0.491737				12.5611	16.8515		11.7257
acG-05f_m67_003	AcR-05f_m67_003		GMA-05f_m67_001				84	16		320				0.775375	0.730328		1.27926				17.2662	13.0376		20.2388
acG-05f_m67_003	AcR-05f_m67_003		GMA-05f_m67_001				16	48		44				0.230283	1.29622		0.644874				9.91955	13.9622		9.96161
acG-05f_m67_003	AcR-05f_m67_003		GMA-05f_m67_001				36	60		28				0.40773	1.10453		0.443139				10.5717	13.4636		9.57024
acG-05f_m67_003	AcR-05f_m67_003		GMA-05f_m67_001				56	64		308				0.796621	0.87158		1.15615				15.9631	11.734		21.3864
acG-05f_m67_003	AcR-05f_m67_003		GMA-05f_m67_001				36	28		40				0.531953	0.578217		0.615141				9.5747	11.1723		12.647
acG-05f_m67_003	AcR-05f_m67_003		GMA-05f_m67_002				20	24		28				0.269482	0.578998		0.587739				9.95623	11.8474		10.5651
acG-05f_m67_003	AcR-05f_m67_003		GMA-05f_m67_002				96	16		24				1.0862	0.711378		0.416714				15.2799	9.40774		12.3116
acG-05f_m67_003	AcR-05f_m67_003		GMA-05f_m67_002				72	32		20				1.19356	1.0891		0.446275				17.1513	9.06589		9.0141
acG-05f_m67_003	AcR-05f_m67_003		GMA-05f_m67_002				28	16		20				0.45661	0.339577		0.436245				11.211	11.5519		10.6604
acG-05f_m67_003	AcR-05f_m67_003		GMA-05f_m67_002				32	32		76				0.769392	0.483436		1.52476				12.8749	9.90101		28.6237
acG-05f_m67_003	AcR-05f_m67_003		GMA-05f_m67_002				16	24		28				0.313025	0.672652		0.486234				10.9039	8.78248		9.45523
acG-05f_m67_003	AcR-05f_m67_003		GMA-05f_m67_002				24	44		28				0.268277	0.936279		0.318191				11.3737	10.2416		10.8382
acG-05f_m67_003	AcR-05f_m67_003		GMA-05f_m67_002				24	28		28				0.39407	0.708585		0.574357				10.3582	9.98785		11.4248
acG-05f_m67_003	AcR-05f_m67_003		GMA-05f_m67_002				64	24		56				0.561309	0.413327		0.866598				13.4593	10.3973		11.9382
acG-05f_m67_003	AcR-05f_m67_003		GMA-05f_m67_002				20	32		20				0.324702	0.873087		0.187486				10.543	11.7327		10.113
acG-05f_m67_003	AcR-05f_m67_003		GMA-05f_m67_002				124	16		52				0.974742	0.66113		0.658595				16.6322	11.7096		14.6297
acG-05f_m67_003	AcR-05f_m67_003		GMA-05f_m67_002				40	40		40				0.504165	0.992271		0.527794				11.1739	10.5698		8.90272
acG-05f_m67_003	AcR-05f_m67_003		GMA-05f_m67_002				32	16		20				0.521507	0.31626		0.537522				10.4501	10.2204		9.40576
acG-05f_m67_003	AcR-05f_m67_003		GMA-05f_m67_002				16	16		52				0.252317	0.662255		0.676058				9.75498	9.68543		9.84411
acG-05f_m67_003	AcR-05f_m67_003		GMA-05f_m67_002				16	24		24				0.432732	0.794039		0.463939				10.3246	11.128		8.44964
acG-05f_m67_003	AcR-05f_m67_003		GMA-05f_m67_002				36	20		52				0.565204	0.251797		0.806606				13.6077	10.9247		11.0079
acG-05f_m67_003	AcR-05f_m67_003		GMA-05f_m67_002				44	52		36				0.861358	0.887454		0.439531				17.6941	11.6232		11.0465
acG-05f_m67_003	AcR-05f_m67_003		GMA-05f_m67_002				68	16		160				0.767918	0.873704		1.43794				12.7869	10.6702		20.4205
acG-05f_m67_003	AcR-05f_m67_003		GMA-05f_m67_002				24	52		48				0.778647	1.03409		0.816332				11.3745	13.194		11.4034
acG-05f_m67_003	AcR-05f_m67_003		GMA-05f_m67_002				16	16		32				0.189346	0.526452		0.344917				11.6251	10.966		9.62845
acG-05f_m67_003	AcR-05f_m67_003		GMA-05f_m67_002				40	52		16				0.657081	0.97551		0.19075				12.9687	10.2711		8.96876
acG-05f_m67_003	AcR-05f_m67_003		GMA-05f_m67_002				48	40		16				0.774519	0.842019		0.575889				14.0222	11.1715		8.87561
acG-05f_m67_003	AcR-05f_m67_003		GMA-05f_m67_002				100	44		28				1.04337	0.688784		0.601823				19.1701	14.4882		9.65292
acG-05f_m67_003	AcR-05f_m67_003		GMA-05f_m67_002				20	24		112				0.303883	0.878891		1.56654				12.8914	11.1521		17.3552
acG-05f_m67_003	AcR-05f_m67_003		GMA-05f_m67_002				84	20		56				0.86121	0.372824		0.626828				18.7802	10.334		12.7949
acG-05f_m67_003	AcR-05f_m67_003		GMA-05f_m67_002				20	36		16				0.161504	0.747744		0.542942				9.36451	10.4315		12.7247
acG-05f_m67_003	AcR-05f_m67_003		GMA-05f_m67_002				20	16		24				0.209476	0.277581		0.624334				11.2086	9.91959		9.107
acG-05f_m67_003	AcR-05f_m67_003		GMA-05f_m67_002				72	16		28				0.805431	0.552294		0.732647				13.8529	9.58133		13.9242
acG-05f_m67_003	AcR-05f_m67_003		GMA-05f_m67_002				48	40		56				0.564217	0.857722		0.613982				14.3761	12.3334		11.6368
acG-05f_m67_003	AcR-05f_m67_003		GMA-05f_m67_002				68	20		160				0.610356	0.308767		1.42652				11.9843	9.15835		17.1586
acG-05f_m67_003	AcR-05f_m67_003		GMA-05f_m67_002				20	16		16				0.231962	0.524822		0.315122				11.6211	10.9327		11.8718
acG-05f_m67_003	AcR-05f_m67_003		GMA-05f_m67_002				20	16		208				0.424427	0.241996		0.865316				10.9867	11.5163		13.8419
acG-05f_m67_003	AcR-05f_m67_003		GMA-05f_m67_002				40	20		80				0.989439	0.470326		0.921117				16.2982	8.68404		14.2655
acG-05f_m67_003	AcR-05f_m67_003		GMA-05f_m67_002				48	20		16				0.577644	0.892912		0.437086				13.2429	11.8419		8.03804
acG-05f_m67_003	AcR-05f_m67_003		GMA-05f_m67_002				32	44		60				0.584011	0.470329		0.625313				14.2908	11.0909		12.1793
acG-05f_m67_003	AcR-05f_m67_003		GMA-05f_m67_002				16	16		20				0.508821	0.53736		0.294791				10.5188	10.3215		10.7585
acG-05f_m67_003	AcR-05f_m67_003		GMA-05f_m67_002				92	44		32				0.716907	1.06041		0.60777				16.1504	11.938		11.7913
acG-05f_m67_003	AcR-05f_m67_003		GMA-05f_m67_002				28	24		124				0.227295	0.681031		1.1933				13.1327	9.41116		20.4654
acG-05f_m67_003	AcR-05f_m67_003		GMA-05f_m67_002				32	32		72				0.45145	0.679726		0.760419				13.5917	11.7741		14.4558
acG-05f_m67_003	AcR-05f_m67_003		GMA-05f_m67_002				24	52		24				0.426012	1.02776		0.30858				11.4545	12.6592		9.28425
acG-05f_m67_003	AcR-05f_m67_003		GMA-05f_m67_002				20	16		40				0.4602	0.745698		0.635621				11.7049	13.0306		12.6057
acG-05f_m67_003	AcR-05f_m67_003		GMA-05f_m67_002				24	24		28				0.238302	0.677137		0.440804				12.5389	8.52111		9.74789
acG-05f_m67_003	AcR-05f_m67_003		GMA-05f_m67_002				24	260		68				0.386598	0.786373		0.61286				14.4917	27.6154		12.5573
acG-05f_m67_003	AcR-05f_m67_003		GMA-05f_m67_002				20	16		40				0.326246	0.498489		0.600708				12.7834	9.50715		10.9513
acG-05f_m67_003	AcR-05f_m67_003		GMA-05f_m67_002				20	16		28				0.280514	0.963675		0.48843				13.8774	11.8451		10.2715
acG-05f_m67_003	AcR-05f_m67_003		GMA-05f_m67_002				36	24		16				0.23853	0.377754		0.26381				16.9109	10.2998		9.98924
acG-05f_m67_003	AcR-05f_m67_003		GMA-05f_m67_002				20	16		24				0.343394	0.636957		0.329702				14.4901	12.5393		11.528
acG-05f_m67_003	AcR-05f_m67_003		GMA-05f_m67_002				28	16		28				0.391833	0.243416		0.954009				13.8395	9.58965		10.4909
acG-05f_m67_003	AcR-05f_m67_003		GMA-05f_m67_002				28	216		36				0.610304	1.71335		0.75693				15.9756	33.5611		16.5272
acG-05f_m67_003	AcR-05f_m67_003		GMA-05f_m67_002				16	20		20				0.413753	0.60688		0.351376				16.7796	10.8918		9.98883
acG-05f_m67_003			GMA-05f_m67_002				20			24				0.192686			0.650141				13.8936			12.4844
acG-05f_m67_003			GMA-05f_m67_002				16			56				0.178			0.692074				13.412			13.4322
acG-05f_m67_003			GMA-05f_m67_002				16			56				0.4972			0.41863				12.8145			11.8881
acG-06f_m67_001			GMA-05f_m67_002				24			20				0.395797			0.640345				7.54119			11.2494
acG-06f_m67_001			GMA-05f_m67_002				20			32				0.523459			0.942069				11.3381			21.2708
acG-06f_m67_001			GMA-05f_m67_002				100			32				0.567563			0.422369				14.7653			12.3514
acG-06f_m67_001			GMA-05f_m67_002				56			32				0.644549			0.501553				11.6364			10.4423
acG-06f_m67_001			GMA-05f_m67_002				68			20				0.63876			0.278247				10.3457			10.0402
acG-06f_m67_001			GMA-05f_m67_002				24			44				1.04209			0.615706				13.0687			14.0348
acG-06f_m67_001			GMA-05f_m67_002				92			20				0.993971			0.449558				28.2383			13.7644
acG-06f_m67_001			GMA-05f_m67_002				124			24				1.00468			0.355501				18.3189			12.8649
acG-06f_m67_001			GMA-05f_m67_002				48			16				0.643238			0.375485				14.8243			9.62775
acG-06f_m67_001			GMA-05f_m67_002				48			16				0.566844			0.278057				12.2628			12.4665
acG-06f_m67_001			GMA-05f_m67_002				200			32				1.05923			0.471967				25.2177			12.2645
acG-06f_m67_001			GMA-05f_m67_003				136			112				0.966817			1.11854				18.8652			14.033
acG-06f_m67_001			GMA-05f_m67_003				56			20				0.333381			0.801909				19.3415			11.5317
acG-06f_m67_001			GMA-05f_m67_003				20			92				0.407452			0.694029				16.2566			15.5056
acG-06f_m67_001			GMA-05f_m67_003				60			24				0.698079			0.449524				10.5421			12.8243
acG-06f_m67_001			GMA-05f_m67_003				52			16				0.747419			0.60957				12.5451			13.4462
acG-06f_m67_001			GMA-05f_m67_003				100			32				0.800646			0.522424				16.8324			10.8952
acG-06f_m67_001			GMA-05f_m67_003				112			36				1.07743			0.846553				16.8631			12.2653
acG-06f_m67_001			GMA-05f_m67_003				36			52				0.425699			0.544859				9.55307			12.9886
acG-06f_m67_001			GMA-05f_m67_003				60			20				1.31679			0.229177				14.6321			11.2428
acG-06f_m67_001			GMA-05f_m67_003				16			36				0.64229			0.986721				9.13314			12.3461
acG-06f_m67_001			GMA-05f_m67_003				32			188				0.807926			1.10592				11.8953			24.159
acG-06f_m67_001			GMA-05f_m67_003				48			16				0.616167			0.138835				14.6023			10.2773
acG-06f_m67_001			GMA-05f_m67_003				72			48				0.846443			0.662907				12.7994			14.6922
acG-06f_m67_001			GMA-05f_m67_003				80			24				0.773442			0.235268				16.1763			11.9626
acG-06f_m67_001			GMA-05f_m67_003				44			16				0.66588			0.124472				14.7853			10.3883
acG-06f_m67_001			GMA-05f_m67_003				28			16				0.373042			0.524717				20.5349			10.4414
acG-06f_m67_001			GMA-05f_m67_003				16			16				0.308068			0.358429				9.90998			10.3802
acG-06f_m67_001			GMA-05f_m67_003				56			24				0.872678			0.509172				15.5382			10.2798
acG-06f_m67_001			GMA-05f_m67_003				84			16				0.846342			0.513862				24.5453			14.6275
acG-06f_m67_001			GMA-05f_m67_003				40			32				0.629785			0.78136				12.3004			14.1614
acG-06f_m67_001			GMA-05f_m67_003				36			28				0.5072			0.405095				11.6481			10.229
acG-06f_m67_001			GMA-05f_m67_003				332			40				1.22797			0.92697				21.9883			15.3004
acG-06f_m67_001			GMA-05f_m67_003				40			16				0.841074			0.356291				14.7134			13.3911
acG-06f_m67_001			GMA-05f_m67_003				28			24				0.328679			0.178643				11.2147			16.7534
acG-06f_m67_001			GMA-05f_m67_003				16			16				0.105326			0.143251				12.4404			12.3636
acG-06f_m67_001			GMA-05f_m67_003				64			28				0.533039			0.725446				14.221			13.657
acG-06f_m67_001			GMA-05f_m67_003				56			244				0.603004			1.14801				15.129			18.6648
acG-06f_m67_001			GMA-05f_m67_003				32			36				0.861804			1.02468				14.3508			12.0457
acG-06f_m67_001			GMA-05f_m67_003				44			40				0.535339			0.708218				12.0586			17.7905
acG-06f_m67_001			GMA-05f_m67_003				16			16				0.0756528			0.820818				9.82225			11.6504
acG-06f_m67_001			GMA-05f_m67_003				40			52				0.753895			1.31298				16.0676			16.6436
acG-06f_m67_001			GMA-06f_m67_001				28			48				0.613002			0.856062				14.4002			12.441
acG-06f_m67_001			GMA-06f_m67_001				56			144				0.877871			1.05885				13.9611			18.5542
acG-06f_m67_001			GMA-06f_m67_001				40			32				0.551152			1.13152				13.6715			16.1615
acG-06f_m67_001			GMA-06f_m67_001				36			36				0.273633			0.58215				12.3166			9.13946
acG-06f_m67_001			GMA-06f_m67_001				24			48				0.320331			0.62087				11.6885			9.5506
acG-06f_m67_001			GMA-06f_m67_001				40			56				0.621144			0.516829				10.2012			10.285
acG-06f_m67_001			GMA-06f_m67_001				80			136				0.671744			1.03165				13.9398			11.9555
acG-06f_m67_001			GMA-06f_m67_001				16			64				0.58882			0.760132				11.7479			11.1686
acG-06f_m67_001			GMA-06f_m67_001				92			48				0.917678			0.643281				19.0727			9.97976
acG-06f_m67_001			GMA-06f_m67_001				52			72				0.509976			0.491393				19.0023			9.74984
acG-06f_m67_001			GMA-06f_m67_001				44			44				0.951378			0.942729				16.5094			10.9648
acG-06f_m67_001			GMA-06f_m67_001				68			40				0.761738			0.434344				12.266			10.3862
acG-06f_m67_001			GMA-06f_m67_001				24			36				0.303179			0.861936				13.5326			12.6078
acG-06f_m67_001			GMA-06f_m67_001				20			44				0.371902			0.603715				10.626			10.379
acG-06f_m67_001			GMA-06f_m67_001				48			32				0.492158			0.266107				11.0962			8.94414
acG-06f_m67_001			GMA-06f_m67_001				24			44				0.349402			0.372494				12.9963			9.64583
acG-06f_m67_001			GMA-06f_m67_001				52			40				0.604416			0.477173				13.5513			9.33579
acG-06f_m67_001			GMA-06f_m67_001				60			48				0.955791			0.839387				17.65			14.9849
acG-06f_m67_001			GMA-06f_m67_001				108			36				0.829941			0.631358				18.3791			9.43511
acG-06f_m67_001			GMA-06f_m67_001				64			28				0.821705			0.679445				14.0147			9.80481
acG-06f_m67_001			GMA-06f_m67_001				44			32				0.55795			0.74229				16.1818			10.5023
acG-06f_m67_001			GMA-06f_m67_001				92			32				0.547262			0.635974				15.4612			9.91554
acG-06f_m67_001			GMA-06f_m67_001				72			16				0.997379			0.353219				17.0453			8.41411
acG-06f_m67_001			GMA-06f_m67_001				84			44				0.691434			0.695242				27.8446			8.79502
acG-06f_m67_001			GMA-06f_m67_001				56			28				0.719016			0.482333				17.4493			12.1292
acG-06f_m67_001			GMA-06f_m67_001				16			64				0.43564			0.734953				12.4716			10.4418
acG-06f_m67_001			GMA-06f_m67_001				72			32				0.772185			0.640833				15.4417			9.12255
acG-06f_m67_001			GMA-06f_m67_001				20			16				0.224929			0.4684				11.3783			7.75619
acG-06f_m67_001			GMA-06f_m67_001				72			328				0.678825			1.79137				16.6574			23.8114
acG-06f_m67_001			GMA-06f_m67_001				92			36				0.751827			0.456078				17.6892			9.71285
acG-06f_m67_001			GMA-06f_m67_001				44			48				0.721831			0.842332				15.5011			10.2417
acG-06f_m67_001			GMA-06f_m67_001				84			40				0.955722			0.594196				25.5264			9.99399
acG-06f_m67_001			GMA-06f_m67_001				68			28				1.0345			0.493897				17.4589			10.094
acG-06f_m67_001			GMA-06f_m67_001				52			44				0.811088			0.82619				17.1608			11.4752
acG-06f_m67_001			GMA-06f_m67_001				32			24				0.706466			0.140407				14.8435			9.51471
acG-06f_m67_001			GMA-06f_m67_001				60			32				0.603908			0.661482				14.8671			9.20668
acG-06f_m67_001			GMA-06f_m67_001				16			48				0.144552			0.70253				12.9774			11.8589
acG-06f_m67_001			GMA-06f_m67_001				16			60				0.223325			0.824461				12.0254			13.4875
acG-06f_m67_001			GMA-06f_m67_001				20			364				0.408721			0.940022				12.5156			17.5796
acG-06f_m67_001			GMA-06f_m67_001				44			40				0.605064			1.17409				14.7125			15.83
acG-06f_m67_001			GMA-06f_m67_001				20			32				0.405519			0.566496				17.1329			11.1663
acG-06f_m67_001			GMA-06f_m67_001				20			24				0.532418			0.989384				14.9396			14.5227
acG-06f_m67_001			GMA-06f_m67_001				32			44				0.569939			1.04293				15.9964			11.0259
acG-06f_m67_001			GMA-06f_m67_001				16			48				0.353559			0.4859				15.9909			10.0996
acG-06f_m67_002			GMA-06f_m67_001				60			44				1.11982			0.532452				20.6921			10.5313
acG-06f_m67_002			GMA-06f_m67_001				72			44				0.791077			0.758498				16.1684			15.6562
acG-06f_m67_002			GMA-06f_m67_001				124			44				1.46417			0.840852				22.1859			13.564
acG-06f_m67_002			GMA-06f_m67_001				32			48				0.540728			0.374361				9.65901			11.1286
acG-06f_m67_002			GMA-06f_m67_001				32			32				0.464979			0.969611				11.6353			19.1819
acG-06f_m67_002			GMA-06f_m67_001				36			36				0.703462			0.55974				13.2633			9.31094
acG-06f_m67_002			GMA-06f_m67_001				44			28				0.734154			0.898013				15.4525			8.47465
acG-06f_m67_002			GMA-06f_m67_001				84			364				1.15146			0.84866				11.9323			22.8615
acG-06f_m67_002			GMA-06f_m67_001				48			264				0.823016			1.13785				17.017			19.2466
acG-06f_m67_002			GMA-06f_m67_001				60			32				1.0401			0.530371				17.2663			9.36335
acG-06f_m67_002			GMA-06f_m67_001				36			28				0.540781			0.676294				9.95931			11.3292
acG-06f_m67_002			GMA-06f_m67_001				24			32				0.439051			0.682872				12.7553			12.9019
acG-06f_m67_002			GMA-06f_m67_001				52			28				0.81008			0.765937				16.0656			11.5521
acG-06f_m67_002			GMA-06f_m67_001				20			124				0.356695			0.898969				10.7931			11.8822
acG-06f_m67_002			GMA-06f_m67_001				52			20				1.08774			0.504405				9.56947			10.3121
acG-06f_m67_002			GMA-06f_m67_001				16			148				0.393787			0.857526				9.27531			13.5685
acG-06f_m67_002			GMA-06f_m67_001				24			36				0.201762			0.824754				10.9141			12.6656
acG-06f_m67_002			GMA-06f_m67_001				44			60				0.950621			1.03232				14.7529			15.89
acG-06f_m67_002			GMA-06f_m67_001				32			116				0.569391			0.908178				10.3713			11.5189
acG-06f_m67_002			GMA-06f_m67_001				84			60				1.39174			0.287695				20.1102			9.20634
acG-06f_m67_002			GMA-06f_m67_001				24			84				0.129643			0.729634				10.8694			9.94487
acG-06f_m67_002			GMA-06f_m67_001				40			64				0.961805			0.872287				11.6056			16.1047
acG-06f_m67_002			GMA-06f_m67_001				64			56				0.711416			0.896707				12.66			12.427
acG-06f_m67_002			GMA-06f_m67_001				40			20				0.972667			0.423861				16.0367			15.041
acG-06f_m67_002			GMA-06f_m67_001				56			20				1.01813			0.610603				20.0198			14.2308
acG-06f_m67_002			GMA-06f_m67_001				20			44				0.568565			0.885964				12.4874			10.4084
acG-06f_m67_002			GMA-06f_m67_001				56			60				0.453456			0.885954				23.3196			11.4474
acG-06f_m67_002			GMA-06f_m67_001				24			108				0.20359			1.14171				10.7918			14.1912
acG-06f_m67_002			GMA-06f_m67_001				24			44				0.388826			0.732821				11.2243			10.2244
acG-06f_m67_002			GMA-06f_m67_001				16			44				0.345326			0.729478				11.6934			9.19886
acG-06f_m67_002			GMA-06f_m67_001				32			20				1.0797			0.552254				5.74184			8.9605
acG-06f_m67_002			GMA-06f_m67_001				24			48				0.899511			1.01699				11.6571			11.59
acG-06f_m67_002			GMA-06f_m67_001				44			64				0.765055			0.840788				11.8564			10.5313
acG-06f_m67_002			GMA-06f_m67_001				36			28				0.59351			0.341242				15.7809			9.95388
acG-06f_m67_002			GMA-06f_m67_003				48			56				1.02882			0.796987				14.0842			17.5022
acG-06f_m67_002			GMA-06f_m67_003				20			32				0.260047			0.622117				10.8378			17.5159
acG-06f_m67_002			GMA-06f_m67_003				20			36				0.51408			1.13155				10.8543			14.8477
acG-06f_m67_002			GMA-06f_m67_003				20			20				0.517142			0.538455				12.0466			11.0593
acG-06f_m67_002			GMA-06f_m67_003				32			148				0.801579			0.991233				12.5792			15.7093
acG-06f_m67_002			GMA-06f_m67_003				16			40				0.472686			0.589963				10.5416			10.5235
acG-06f_m67_002			GMA-06f_m67_003				36			52				0.517297			1.32844				14.329			16.5315
acG-06f_m67_002			GMA-06f_m67_003				48			44				0.8418			0.908462				13.4423			16.9351
acG-06f_m67_002			GMA-06f_m67_003				72			60				0.700672			1.38109				12.3735			26.0833
acG-06f_m67_002			GMA-06f_m67_003				52			32				0.635497			1.10095				13.3819			16.7801
acG-06f_m67_002			GMA-06f_m67_003				16			84				0.487534			1.2565				12.2163			15.4375
acG-06f_m67_002			GMA-06f_m67_003				32			56				0.570065			1.31218				11.5322			17.693
acG-06f_m67_002			GMA-06f_m67_003				32			32				0.265586			1.06444				11.6127			11.9654
acG-06f_m67_002			GMA-06f_m67_003				32			20				0.126883			0.470891				10.4013			9.4015
acG-06f_m67_002			GMA-06f_m67_003				36			36				0.682782			0.768099				12.0479			12.4816
acG-06f_m67_002			GMA-06f_m67_003				20			24				0.236011			0.654857				9.69694			13.8694
acG-06f_m67_002			GMA-06f_m67_003				16			16				0.384705			0.808777				11.9914			11.4113
acG-06f_m67_002			GMA-06f_m67_003				96			60				1.27067			0.787071				19.1116			16.0103
acG-06f_m67_002			GMA-06f_m67_003				20			20				0.417038			0.276362				15.5041			11.6393
acG-06f_m67_002			GMA-06f_m67_003				40			88				0.745638			0.951603				16.5757			17.8676
acG-06f_m67_002			GMA-06f_m67_003				40			24				0.473539			0.992981				13.0748			14.9654
acG-06f_m67_002			GMA-06f_m67_003				28			24				0.410547			0.464697				11.7737			12.7377
acG-06f_m67_002			GMA-06f_m67_003				36			16				0.68415			0.586923				15.4471			13.5256
acG-06f_m67_002			GMA-06f_m67_003				56			140				1.28177			0.88649				13.6127			19.7769
acG-06f_m67_002			GMA-06f_m67_003				20			32				0.436446			0.871817				11.9609			10.5653
acG-06f_m67_002			GMA-06f_m67_003				44			64				0.385854			0.796138				12.2847			14.9945
acG-06f_m67_002			GMA-06f_m67_003				20			76				0.50785			0.945148				14.6162			15.4329
acG-06f_m67_002			GMA-06f_m67_003				28			72				0.52996			0.965181				10.4191			15.8006
acG-06f_m67_002			GMA-06f_m67_003				40			36				1.17674			0.620354				23.2541			8.93155
acG-06f_m67_002			GMA-06f_m67_003				28			16				0.609688			0.605393				17.1558			11.9546
acG-06f_m67_002			GMA-06f_m67_003				32			16				0.415745			0.910913				12.5052			14.0144
acG-06f_m67_002			GMA-06f_m67_003				20			32				0.379428			0.349671				11.8706			14.5319
acG-06f_m67_002			GMA-06f_m67_003				32			24				0.620751			0.981413				18.0325			10.3832
acG-06f_m67_002			GMA-06f_m67_003				76			16				0.781004			0.392762				19.6839			10.9763
acG-06f_m67_002			GMA-06f_m67_003				24			16				0.401459			0.730115				10.8328			10.2447
acG-06f_m67_002			GMA-06f_m67_003				80			32				1.77106			0.773316				25.0851			18.1679
acG-06f_m67_002			GMA-06f_m67_003				32			24				0.734042			0.585054				12.4243			12.3118
acG-06f_m67_002			GMA-06f_m67_003				40			72				0.456968			1.31795				13.2735			22.7094
acG-06f_m67_002			GMA-06f_m67_003				24			188				0.47512			1.1361				13.1565			15.6308
acG-06f_m67_002			GMA-06f_m67_003				28			76				0.785734			1.49043				11.527			20.6999
acG-06f_m67_002			GMA-06f_m67_003				32			52				0.385849			0.863662				10.8938			14.8847
acG-06f_m67_002			GMA-06f_m67_003				24			40				0.408283			0.685023				10.5635			12.5767
acG-06f_m67_002			GMA-06f_m67_003				84			32				0.783734			1.10962				16.8004			13.2487
acG-06f_m67_002			GMA-06f_m67_003				20			32				0.799358			0.712392				15.984			13.6202
acG-06f_m67_002			GMA-06f_m67_003				40			68				0.773592			0.969834				14.1646			13.2844
acG-06f_m67_002			GMA-06f_m67_003				60			96				0.542707			0.998026				14.6573			16.7876
acG-06f_m67_002			GMA-06f_m67_003				20			48				0.284135			0.720555				12.1186			12.1142
acG-06f_m67_002			GMA-06f_m67_003				56			140				0.97677			1.33325				19.7642			17.0814
acG-06f_m67_002			GMA-06f_m67_003				28			148				0.550006			1.15652				12.5481			14.2508
acG-06f_m67_002			GMA-06f_m67_003				68			24				1.11048			0.875954				19.167			14.4192
acG-06f_m67_002			GMA-06f_m67_003				48			72				0.870154			0.98642				15.0203			15.3918
acG-06f_m67_002			GMA-06f_m67_003				48			32				0.988089			0.749895				16.7518			12.6499
acG-06f_m67_002			GMA-06f_m67_003				32			28				0.631578			0.646639				11.1632			20.3705
acG-06f_m67_002			GMA-06f_m67_003				16			16				0.459581			0.365485				14.0777			10.5213
acG-06f_m67_002			GMA-06f_m67_003				24			24				0.500019			0.524979				11.9313			11.3959
acG-06f_m67_002			GMA-06f_m67_003				16			52				0.352133			0.813489				13.3318			13.4233
acG-06f_m67_002			GMA-06f_m67_003				24			20				0.364987			0.2323				9.06449			11.577
acG-06f_m67_002			GMA-06f_m67_003				160			20				1.49496			0.483486				17.1487			10.6437
acG-06f_m67_002			GMA-06f_m67_003				68			20				0.43053			0.560185				15.2628			12.9337
acG-06f_m67_002			GMA-06f_m67_003				20			28				0.426411			1.09201				10.0947			10.0473
acG-06f_m67_002			GMA-06f_m67_003				36			24				0.67753			0.422223				13.3129			10.7315
acG-06f_m67_002			GMA-06f_m67_003				76			24				0.78514			0.915449				15.9818			13.6496
acG-06f_m67_002			GMA-06f_m67_003				20			24				0.175997			0.409005				11.998			11.7267
acG-06f_m67_002			GMA-06f_m67_003				68			44				0.652313			1.07109				13.5913			14.3494
acG-06f_m67_002			GMA-06f_m67_003				36			20				0.818842			0.204171				15.1065			10.0393
acG-06f_m67_002			GMA-06f_m67_003				32			24				0.349554			0.663957				11.3401			12.8703
acG-06f_m67_002			GMA-06f_m67_003				20			24				0.184985			0.841488				10.7126			18.1845
acG-06f_m67_002			GMA-06f_m67_003				68			68				0.52993			0.598297				19.9113			16.2266
acG-06f_m67_002			GMA-06f_m67_003				20			52				0.620575			0.920455				9.28704			14.2458
acG-06f_m67_002			GMA-06f_m67_003				40			16				0.627993			0.400693				16.4481			14.9216
acG-06f_m67_002			GMA-06f_m67_003				40			44				0.673349			0.279942				13.4139			19.4701
acG-06f_m67_002			GMA-06f_m67_003				140			24				1.10952			0.630092				17.8893			11.383
acG-06f_m67_002			GMA-06f_m67_003				48			16				0.707557			0.855012				14.9525			11.9441
acG-06f_m67_002			GMA-07f_m67_001				40			28				0.622707			0.682759				12.7372			18.0739
acG-06f_m67_002			GMA-07f_m67_001				28			320				0.530763			1.08432				12.8196			15.2214
acG-06f_m67_002			GMA-07f_m67_001				20			28				0.355013			0.77391				11.5896			11.0015
acG-06f_m67_002			GMA-07f_m67_001				44			36				0.808778			0.700975				13.1174			11.7064
acG-06f_m67_002			GMA-07f_m67_001				36			20				0.644789			0.452765				11.7374			10.6523
acG-06f_m67_002			GMA-07f_m67_001				20			100				0.533625			1.11205				10.2366			14.3353
acG-06f_m67_002			GMA-07f_m67_001				48			28				0.807022			0.697108				15.2463			10.2743
acG-06f_m67_002			GMA-07f_m67_001				48			20				0.717619			0.773442				14.1486			8.6516
acG-06f_m67_002			GMA-07f_m67_001				16			24				0.373543			0.761067				15.6838			14.4236
acG-06f_m67_002			GMA-07f_m67_001				36			32				0.840818			0.526291				20.3167			10.2472
acG-06f_m67_002			GMA-07f_m67_001				28			16				0.40331			0.571828				11.8261			9.07655
acG-06f_m67_002			GMA-07f_m67_001				16			68				0.153315			0.805004				14.0106			13.5184
acG-06f_m67_002			GMA-07f_m67_001				40			48				0.601729			0.741723				17.4137			12.076
acG-06f_m67_002			GMA-07f_m67_001				40			16				0.930029			0.705066				17.5851			9.79656
acG-06f_m67_002			GMA-07f_m67_001				16			24				0.3805			0.199449				12.3745			9.66064
acG-06f_m67_002			GMA-07f_m67_001				44			28				0.467973			0.82207				13.8367			11.0687
acG-06f_m67_002			GMA-07f_m67_001				16			48				0.28037			0.68857				10.5624			10.001
acG-06f_m67_002			GMA-07f_m67_001				16			44				0.411937			0.83222				13.4738			12.6427
acG-06f_m67_002			GMA-07f_m67_001				36			44				0.962054			0.763842				17.2246			15.1566
acG-06f_m67_002			GMA-07f_m67_001				20			104				0.55696			1.13467				21.8746			13.0109
acG-06f_m67_002			GMA-07f_m67_001				20			112				0.380152			1.41829				10.5863			17.4909
acG-06f_m67_002			GMA-07f_m67_001				24			16				0.563905			0.559749				18.4261			11.3019
acG-06f_m67_002			GMA-07f_m67_001				20			16				0.363886			0.321521				10.7748			11.4215
acG-06f_m67_002			GMA-07f_m67_001				16			88				0.646745			1.1118				12.0026			15.8105
acG-06f_m67_002			GMA-07f_m67_001				24			48				0.92071			1.18261				17.5206			12.1346
acG-06f_m67_002			GMA-07f_m67_001				96			28				0.938081			0.579285				13.3465			10.7928
acG-06f_m67_002			GMA-07f_m67_001				16			36				0.712753			0.747706				13.8353			18.6765
acG-06f_m67_002			GMA-07f_m67_001				20			52				0.47781			0.517639				15.0558			11.2071
acG-06f_m67_002			GMA-07f_m67_001				24			48				0.744304			1.01663				22.9607			13.1061
acG-06f_m67_002			GMA-07f_m67_001				16			20				0.2382			0.798976				12.5964			11.9461
acG-06f_m67_002			GMA-07f_m67_001				52			36				0.512041			0.810939				11.9771			11.4246
acG-06f_m67_002			GMA-07f_m67_001				20			32				0.167244			0.347336				12.677			12.0183
acG-06f_m67_002			GMA-07f_m67_001				48			36				0.531809			1.13055				29.5096			11.0473
acG-06f_m67_002			GMA-07f_m67_001				24			16				0.893319			0.631728				20.0417			10.6086
acG-06f_m67_002			GMA-07f_m67_001				20			64				0.384394			0.490935				10.6113			10.4842
acG-06f_m67_002			GMA-07f_m67_001				88			28				0.957582			0.622494				16.705			11.3577
acG-06f_m67_002			GMA-07f_m67_001				20			20				0.768881			0.579238				11.1934			9.14146
acG-06f_m67_002			GMA-07f_m67_001				24			108				0.260369			1.43325				14.2753			16.2158
acG-06f_m67_002			GMA-07f_m67_001				104			24				0.875897			0.519599				12.0107			10.5708
acG-06f_m67_002			GMA-07f_m67_001				36			64				0.681412			0.791872				13.2336			12.2946
acG-06f_m67_002			GMA-07f_m67_001				80			76				0.928165			0.981425				19.3165			15.1529
acG-06f_m67_002			GMA-07f_m67_001				36			20				0.287695			0.621607				9.12384			10.7129
acG-06f_m67_002			GMA-07f_m67_001				24			36				0.508601			0.658493				8.99047			16.263
acG-06f_m67_002			GMA-07f_m67_001				16			24				0.199236			0.549719				7.3271			15.9498
acG-06f_m67_002			GMA-07f_m67_001				180			24				0.786451			0.783751				14.4317			12.0713
acG-06f_m67_002			GMA-07f_m67_001				140			44				1.43037			0.965212				25.3541			13.8548
acG-06f_m67_002			GMA-07f_m67_001				40			20				0.717687			0.756412				15.9849			11.5909
acG-06f_m67_002			GMA-07f_m67_001				56			16				0.829812			0.453811				21.3465			8.731
acG-06f_m67_002			GMA-07f_m67_001				100			60				0.946673			0.85163				13.3246			12.5081
acG-06f_m67_002			GMA-07f_m67_001				96			20				0.599318			0.299189				12.6711			10.6337
acG-06f_m67_002			GMA-07f_m67_001				20			36				0.363928			0.635916				16.8553			12.8724
acG-06f_m67_002			GMA-07f_m67_001				32			36				0.984127			0.441122				11.2037			12.7166
acG-06f_m67_002			GMA-07f_m67_001				88			32				0.954736			0.41999				16.6179			12.2841
acG-06f_m67_002			GMA-07f_m67_001				76			20				0.822195			0.505931				14.6779			11.0197
acG-06f_m67_002			GMA-07f_m67_001				20			20				0.436015			0.899503				9.18577			10.9223
acG-06f_m67_002			GMA-07f_m67_001				36			48				0.56293			0.754265				14.7299			10.5194
acG-06f_m67_002			GMA-07f_m67_001				32			20				0.645532			0.721134				14.8278			13.9749
acG-06f_m67_002			GMA-07f_m67_001				76			24				1.08938			0.307083				15.4699			9.73407
acG-06f_m67_002			GMA-07f_m67_001				92			32				0.83155			0.808964				13.6973			11.3444
acG-06f_m67_002			GMA-07f_m67_003				20			20				0.309622			0.907603				10.1793			12.6048
acG-06f_m67_002			GMA-07f_m67_003				272			24				1.35636			0.31765				21.4062			9.91524
acG-06f_m67_002			GMA-07f_m67_003				76			32				1.36772			0.680505				25.1501			15.0641
acG-06f_m67_002			GMA-07f_m67_003				120			56				0.868561			0.430408				12.2185			12.1059
acG-06f_m67_002			GMA-07f_m67_003				32			44				0.562936			0.794045				12.641			13.2586
acG-06f_m67_002			GMA-07f_m67_003				40			24				0.501253			0.309933				12.3253			11.445
acG-06f_m67_002			GMA-07f_m67_003				52			60				0.852639			0.929964				17.4843			11.075
acG-06f_m67_002			GMA-07f_m67_003				36			24				0.44784			0.562452				11.339			12.7959
acG-06f_m67_002			GMA-07f_m67_003				52			16				1.28997			0.201234				18.2487			10.7331
acG-06f_m67_002			GMA-07f_m67_003				168			16				1.45715			0.141782				20.3342			11.1297
acG-06f_m67_002			GMA-07f_m67_003				36			44				0.345553			0.316194				10.042			13.4972
acG-06f_m67_002			GMA-07f_m67_003				68			16				1.40154			0.497283				26.6535			11.6046
acG-06f_m67_002			GMA-07f_m67_003				32			36				0.334464			0.932068				11.2122			12.9846
acG-06f_m67_002			GMA-07f_m67_003				56			36				0.4431			0.502283				11.6518			13.9629
acG-06f_m67_002			GMA-07f_m67_003				72			48				0.735528			1.09384				12.9903			18.3035
acG-06f_m67_002			GMA-07f_m67_003				36			24				0.335845			0.331594				9.02447			11.4851
acG-06f_m67_002			GMA-07f_m67_003				24			28				0.484831			0.433052				11.5787			13.8667
acG-06f_m67_002			GMA-07f_m67_003				104			36				0.984092			0.746645				20.5035			12.5689
acG-06f_m67_002			GMA-07f_m67_003				32			20				0.639493			0.304267				11.0012			14.7935
acG-06f_m67_002			GMA-07f_m67_003				20			64				0.133875			0.903057				9.41266			15.4369
acG-06f_m67_002			GMA-07f_m67_003				20			24				0.347191			0.221945				12.4442			12.116
acG-06f_m67_002			GMA-07f_m67_003				28			44				0.751021			0.578404				14.6751			13.0714
acG-06f_m67_002			GMA-07f_m67_003				112			68				1.23123			0.632359				15.4679			14.4548
acG-06f_m67_002			GMA-07f_m67_003				32			28				1.15198			0.479977				14.3652			13.8001
acG-06f_m67_002			GMA-07f_m67_003				52			16				0.85627			0.262488				14.7868			15.1545
acG-06f_m67_002			GMA-07f_m67_003				104			20				0.796356			0.332471				14.5189			12.2328
acG-06f_m67_002			GMA-07f_m67_003				40			16				0.664539			0.252619				12.3368			17.228
acG-06f_m67_002			GMA-07f_m67_003				48			136				0.535667			0.907568				13.1291			21.4687
acG-06f_m67_002			GMA-07f_m67_003				40			76				0.690895			0.856358				14.7892			17.3279
acG-06f_m67_002			GMA-07f_m67_003				36			28				0.485505			0.444482				11.9698			12.775
acG-06f_m67_002			GMA-07f_m67_003				28			24				0.431776			0.294635				10.7185			6.51123
acG-06f_m67_002							92							0.81709							13.9769
acG-06f_m67_002							20							0.389394							10.8852
acG-06f_m67_002							40							0.543235							11.934
acG-06f_m67_002							40							0.568116							13.0909
