# Supplementary material for: An autoinhibitory clamp of actin assembly constrains and directs synaptic endocytosis
Source: eLife journal article supplement (doi:10.7554/elife.69597), 2021-07-29
Supplement: fig1-data1 [file Figure 1E_source data Pearson R.xlsx]

## Sheet: Sheet1
Unthresholded Pearson R (to lifeact::Ruby)
BRP	Clc	Arp3	Dia
0.1	0.22	0.67	0.63
0.16	0.36	0.78	0.64
0.11	0.42	0.68	0.38
0.11	0.59	0.8	0.41
0.12	0.43	0.8	0.58
0.16	0.57	0.73	0.41
0.19	0.43	0.57	0.49
0.03	0.6	0.48	0.35
0.13	0.41	0.83
0.35		0.64
0.22		0.79
0.07		0.66
0.01
