# Supplementary material for: An autoinhibitory clamp of actin assembly constrains and directs synaptic endocytosis
Source: eLife journal article supplement (doi:10.7554/elife.69597), 2021-07-29
Supplement: fig1-data1 [file Figure 1G-I_PatchDynamics.xlsx]

## Sheet: WholeNMJData
					0.395378
Rev FN	File	CellArea	Ch1Mean	Ch1CoV	Threshold for PT
CON_01f_m67_001	CON_01f_m67_001_ Reg.tif	56.1956	2418.57	0.63898	956.249
CON_01f_m67_002	CON_01f_m67_002_ Reg.tif	41.3867	1556.48	0.54829	615.397
CON_01f_m67_003	CON_01f_m67_003_ Reg.tif	88.8356	618.606	0.5679	244.583
CON_02f_m67_002	CON_02f_m67_002_ Reg.tif	40.2489	1412.08	0.52878	558.303
CON_03f_m67_001	CON_03f_m67_001_ Reg.tif	186.827	825.534	0.65068	326.398
CON_03f_m67_002	CON_03f_m67_002_ Reg.tif	37.8489	285.081	0.56127	112.715
CON_03f_m67_003	CON_03f_m67_003_ Reg.tif	127.04	610.563	0.62913	241.403
CON_05f_m67_001	CON_05f_m67_001_ Reg.tif	131.822	763.024	0.58557	301.683
CON_05f_m67_002	CON_05f_m67_002_ Reg.tif	84.8	851.902	0.66386	336.823
CON_06f_m67_001	CON_06f_m67_001_ Reg.tif	251.147	433.857	0.6185	171.537
CON_06f_m67_002	CON_06f_m67_002_ Reg.tif	64.2844	506.278	0.75335	200.171
WSP_01f_m67_001	WSP_01f_m67_001_ Reg.tif	48.0178	616.716	0.58077	243.836
WSP_01f_m67_002	WSP_01f_m67_002_ Reg.tif	54.0089	814.225	0.44816	321.926
WSP_02f_m67_001	WSP_02f_m67_001_ Reg.tif	115.218	338.686	0.6167	133.909
WSP_03f_m67_001	WSP_03f_m67_001_ Reg.tif	78.1511	1158.34	0.56747	457.982
WSP_03f_m67_002	WSP_03f_m67_002_ Reg.tif	84.9422	855.763	0.37229	338.349
WSP_03f_m67_003	WSP_03f_m67_003_ Reg.tif	72.3911	488.932	0.46374	193.313
WSP_04f_m67_001	WSP_04f_m67_001_ Reg.tif	75.04	1166.22	0.58014	461.099
WSP_04f_m67_002	WSP_04f_m67_002_ Reg.tif	21.0489	838.627	0.34867	331.574
WSP_04f_m67_003	WSP_04f_m67_003_ Reg.tif	80.1956	992.863	0.33135	392.556
WSP_05f_m67_001	WSP_05f_m67_001_ Reg.tif	124.942	521.919	0.52989	206.355
WSP_05f_m67_002	WSP_05f_m67_002_ Reg.tif	62.1156	1433.42	0.51226	566.741
WSP_06f_m67_001	WSP_06f_m67_001_ Reg.tif	99.7156	618.755	0.61629	244.642
WSP_06f_m67_002	WSP_06f_m67_002_ Reg.tif	139.093	487.143	0.5461	192.605
WSP_07f_m67_001	WSP_07f_m67_001_ Reg.tif	44.0711	265.707	0.67133	105.055
WSP_07f_m67_002	WSP_07f_m67_002_ Reg.tif	31.7689	181.091	0.61708	71.5992
WSP_07f_m67_003	WSP_07f_m67_003_ Reg.tif	73.1733	281.928	0.55478	111.468

## Sheet: RawPTData
NMJ	Geno	NMJ-ROI	Duration	MeanIntensity	NormIntensityRange	NMJMean	NormPatchInt	NMJArea
CON_01f_m67_001	CON	CON_01f_m67_001.xlsx_RoiSetAuto-1.zip Distance px	276	43974.9	1.14339	2418.57	18.1822	2418.57
CON_01f_m67_001	CON	CON_01f_m67_001.xlsx_RoiSetAuto-10.zip Distance px	48	30163.5	0.832884	2418.57	12.4716	2418.57
CON_01f_m67_001	CON	CON_01f_m67_001.xlsx_RoiSetAuto-11.zip Distance px	24	22306.5	0.216692	2418.57	9.22301	2418.57
CON_01f_m67_001	CON	CON_01f_m67_001.xlsx_RoiSetAuto-12.zip Distance px	16	25116.5	0.39085	2418.57	10.3848	2418.57
CON_01f_m67_001	CON	CON_01f_m67_001.xlsx_RoiSetAuto-14.zip Distance px	116	30771.4	0.549994	2418.57	12.723	2418.57
CON_01f_m67_001	CON	CON_01f_m67_001.xlsx_RoiSetAuto-15.zip Distance px	16	24848.9	0.224182	2418.57	10.2742	2418.57
CON_01f_m67_001	CON	CON_01f_m67_001.xlsx_RoiSetAuto-16.zip Distance px	44	33243.9	0.719065	2418.57	13.7453	2418.57
CON_01f_m67_001	CON	CON_01f_m67_001.xlsx_RoiSetAuto-17.zip Distance px	32	25216.6	0.471918	2418.57	10.4262	2418.57
CON_01f_m67_001	CON	CON_01f_m67_001.xlsx_RoiSetAuto-18.zip Distance px	16	21988.6	0.211015	2418.57	9.09155	2418.57
CON_01f_m67_001	CON	CON_01f_m67_001.xlsx_RoiSetAuto-19.zip Distance px	48	23386.4	0.483741	2418.57	9.66951	2418.57
CON_01f_m67_001	CON	CON_01f_m67_001.xlsx_RoiSetAuto-2.zip Distance px	88	40809.1	0.869056	2418.57	16.8732	2418.57
CON_01f_m67_001	CON	CON_01f_m67_001.xlsx_RoiSetAuto-20.zip Distance px	24	23052	0.180913	2418.57	9.53123	2418.57
CON_01f_m67_001	CON	CON_01f_m67_001.xlsx_RoiSetAuto-21.zip Distance px	76	39199.9	0.763551	2418.57	16.2079	2418.57
CON_01f_m67_001	CON	CON_01f_m67_001.xlsx_RoiSetAuto-22.zip Distance px	76	33729.9	0.739974	2418.57	13.9462	2418.57
CON_01f_m67_001	CON	CON_01f_m67_001.xlsx_RoiSetAuto-23.zip Distance px	44	30095	0.388074	2418.57	12.4433	2418.57
CON_01f_m67_001	CON	CON_01f_m67_001.xlsx_RoiSetAuto-25.zip Distance px	60	28803.8	0.363013	2418.57	11.9094	2418.57
CON_01f_m67_001	CON	CON_01f_m67_001.xlsx_RoiSetAuto-27.zip Distance px	32	29691.7	0.463891	2418.57	12.2765	2418.57
CON_01f_m67_001	CON	CON_01f_m67_001.xlsx_RoiSetAuto-28.zip Distance px	60	36692.9	0.673459	2418.57	15.1713	2418.57
CON_01f_m67_001	CON	CON_01f_m67_001.xlsx_RoiSetAuto-3.zip Distance px	52	30582.7	0.907738	2418.57	12.6449	2418.57
CON_01f_m67_001	CON	CON_01f_m67_001.xlsx_RoiSetAuto-30.zip Distance px	28	25073.5	0.86081	2418.57	10.3671	2418.57
CON_01f_m67_001	CON	CON_01f_m67_001.xlsx_RoiSetAuto-31.zip Distance px	40	29305.6	0.287004	2418.57	12.1169	2418.57
CON_01f_m67_001	CON	CON_01f_m67_001.xlsx_RoiSetAuto-32.zip Distance px	20	30293.2	0.643552	2418.57	12.5252	2418.57
CON_01f_m67_001	CON	CON_01f_m67_001.xlsx_RoiSetAuto-4.zip Distance px	28	35329.8	0.987146	2418.57	14.6077	2418.57
CON_01f_m67_001	CON	CON_01f_m67_001.xlsx_RoiSetAuto-6.zip Distance px	24	23278.5	0.415522	2418.57	9.62491	2418.57
CON_01f_m67_001	CON	CON_01f_m67_001.xlsx_RoiSetAuto-7.zip Distance px	48	46283.5	0.754199	2418.57	19.1367	2418.57
CON_01f_m67_001	CON	CON_01f_m67_001.xlsx_RoiSetAuto-8.zip Distance px	28	24878.1	0.432856	2418.57	10.2863	2418.57
CON_01f_m67_001	CON	CON_01f_m67_001.xlsx_RoiSetAuto-9.zip Distance px	56	43454.2	0.758004	2418.57	17.9669	2418.57
CON_01f_m67_002	CON	CON_01f_m67_002.xlsx_RoiSetAuto-1.zip Distance px	20	17808.8	0.60051	1556.48	11.4418	1556.48
CON_01f_m67_002	CON	CON_01f_m67_002.xlsx_RoiSetAuto-10.zip Distance px	28	8779.82	0.347538	1556.48	5.64082	1556.48
CON_01f_m67_002	CON	CON_01f_m67_002.xlsx_RoiSetAuto-11.zip Distance px	160	34027.6	1.15112	1556.48	21.8619	1556.48
CON_01f_m67_002	CON	CON_01f_m67_002.xlsx_RoiSetAuto-12.zip Distance px	24	16213.7	0.330753	1556.48	10.4169	1556.48
CON_01f_m67_002	CON	CON_01f_m67_002.xlsx_RoiSetAuto-13.zip Distance px	28	18324	0.550107	1556.48	11.7727	1556.48
CON_01f_m67_002	CON	CON_01f_m67_002.xlsx_RoiSetAuto-14.zip Distance px	16	13080.9	0.43053	1556.48	8.40417	1556.48
CON_01f_m67_002	CON	CON_01f_m67_002.xlsx_RoiSetAuto-15.zip Distance px	36	15842.8	0.631252	1556.48	10.1786	1556.48
CON_01f_m67_002	CON	CON_01f_m67_002.xlsx_RoiSetAuto-16.zip Distance px	20	7934.85	0.16833	1556.48	5.09795	1556.48
CON_01f_m67_002	CON	CON_01f_m67_002.xlsx_RoiSetAuto-17.zip Distance px	36	8786.19	0.227722	1556.48	5.64491	1556.48
CON_01f_m67_002	CON	CON_01f_m67_002.xlsx_RoiSetAuto-18.zip Distance px	20	17309.7	0.401561	1556.48	11.1211	1556.48
CON_01f_m67_002	CON	CON_01f_m67_002.xlsx_RoiSetAuto-19.zip Distance px	32	20322.1	0.663825	1556.48	13.0565	1556.48
CON_01f_m67_002	CON	CON_01f_m67_002.xlsx_RoiSetAuto-2.zip Distance px	112	19901	0.653019	1556.48	12.7859	1556.48
CON_01f_m67_002	CON	CON_01f_m67_002.xlsx_RoiSetAuto-20.zip Distance px	56	16674.3	0.402869	1556.48	10.7128	1556.48
CON_01f_m67_002	CON	CON_01f_m67_002.xlsx_RoiSetAuto-21.zip Distance px	112	20707.7	0.740704	1556.48	13.3042	1556.48
CON_01f_m67_002	CON	CON_01f_m67_002.xlsx_RoiSetAuto-22.zip Distance px	188	24445.2	0.777485	1556.48	15.7055	1556.48
CON_01f_m67_002	CON	CON_01f_m67_002.xlsx_RoiSetAuto-23.zip Distance px	16	10972.5	0.273039	1556.48	7.04957	1556.48
CON_01f_m67_002	CON	CON_01f_m67_002.xlsx_RoiSetAuto-24.zip Distance px	140	22280.6	1.09287	1556.48	14.3147	1556.48
CON_01f_m67_002	CON	CON_01f_m67_002.xlsx_RoiSetAuto-25.zip Distance px	52	20659.9	0.709305	1556.48	13.2735	1556.48
CON_01f_m67_002	CON	CON_01f_m67_002.xlsx_RoiSetAuto-26.zip Distance px	16	18657	0.273761	1556.48	11.9867	1556.48
CON_01f_m67_002	CON	CON_01f_m67_002.xlsx_RoiSetAuto-27.zip Distance px	36	18128.9	0.39697	1556.48	11.6474	1556.48
CON_01f_m67_002	CON	CON_01f_m67_002.xlsx_RoiSetAuto-28.zip Distance px	20	13866.6	0.337058	1556.48	8.90894	1556.48
CON_01f_m67_002	CON	CON_01f_m67_002.xlsx_RoiSetAuto-29.zip Distance px	24	18517	0.408413	1556.48	11.8967	1556.48
CON_01f_m67_002	CON	CON_01f_m67_002.xlsx_RoiSetAuto-3.zip Distance px	16	13665.5	0.424442	1556.48	8.77974	1556.48
CON_01f_m67_002	CON	CON_01f_m67_002.xlsx_RoiSetAuto-31.zip Distance px	28	19593	0.401126	1556.48	12.588	1556.48
CON_01f_m67_002	CON	CON_01f_m67_002.xlsx_RoiSetAuto-32.zip Distance px	32	18599.1	0.339042	1556.48	11.9495	1556.48
CON_01f_m67_002	CON	CON_01f_m67_002.xlsx_RoiSetAuto-33.zip Distance px	24	19376	0.325576	1556.48	12.4486	1556.48
CON_01f_m67_002	CON	CON_01f_m67_002.xlsx_RoiSetAuto-34.zip Distance px	20	16916.8	0.287387	1556.48	10.8686	1556.48
CON_01f_m67_002	CON	CON_01f_m67_002.xlsx_RoiSetAuto-35.zip Distance px	16	18531.6	0.205555	1556.48	11.9061	1556.48
CON_01f_m67_002	CON	CON_01f_m67_002.xlsx_RoiSetAuto-36.zip Distance px	24	19025.3	0.359711	1556.48	12.2233	1556.48
CON_01f_m67_002	CON	CON_01f_m67_002.xlsx_RoiSetAuto-37.zip Distance px	28	22073.9	0.537793	1556.48	14.1819	1556.48
CON_01f_m67_002	CON	CON_01f_m67_002.xlsx_RoiSetAuto-39.zip Distance px	24	20208.2	0.393245	1556.48	12.9832	1556.48
CON_01f_m67_002	CON	CON_01f_m67_002.xlsx_RoiSetAuto-4.zip Distance px	20	14594.3	0.451497	1556.48	9.37649	1556.48
CON_01f_m67_002	CON	CON_01f_m67_002.xlsx_RoiSetAuto-40.zip Distance px	60	21601.9	0.504068	1556.48	13.8787	1556.48
CON_01f_m67_002	CON	CON_01f_m67_002.xlsx_RoiSetAuto-41.zip Distance px	64	12026.2	0.486923	1556.48	7.72655	1556.48
CON_01f_m67_002	CON	CON_01f_m67_002.xlsx_RoiSetAuto-5.zip Distance px	48	23600.1	0.504399	1556.48	15.1625	1556.48
CON_01f_m67_002	CON	CON_01f_m67_002.xlsx_RoiSetAuto-6.zip Distance px	144	20269	0.830652	1556.48	13.0223	1556.48
CON_01f_m67_002	CON	CON_01f_m67_002.xlsx_RoiSetAuto-7.zip Distance px	196	20962.4	0.850795	1556.48	13.4678	1556.48
CON_01f_m67_002	CON	CON_01f_m67_002.xlsx_RoiSetAuto-8.zip Distance px	144	24391.8	1.23354	1556.48	15.6712	1556.48
CON_01f_m67_002	CON	CON_01f_m67_002.xlsx_RoiSetAuto-9.zip Distance px	20	13589.4	0.319143	1556.48	8.73087	1556.48
CON_01f_m67_003	CON	CON_01f_m67_003.xlsx_RoiSetAuto-10.zip Distance px	96	13389.5	1.50709	618.606	21.6446	618.606
CON_01f_m67_003	CON	CON_01f_m67_003.xlsx_RoiSetAuto-11.zip Distance px	28	24326.7	0.631623	618.606	39.3251	618.606
CON_01f_m67_003	CON	CON_01f_m67_003.xlsx_RoiSetAuto-12.zip Distance px	16	6941.41	0.689325	618.606	11.2211	618.606
CON_01f_m67_003	CON	CON_01f_m67_003.xlsx_RoiSetAuto-14.zip Distance px	32	12047.6	0.542197	618.606	19.4754	618.606
CON_01f_m67_003	CON	CON_01f_m67_003.xlsx_RoiSetAuto-15.zip Distance px	32	7380.11	0.647155	618.606	11.9302	618.606
CON_01f_m67_003	CON	CON_01f_m67_003.xlsx_RoiSetAuto-16.zip Distance px	32	8273.09	0.807106	618.606	13.3738	618.606
CON_01f_m67_003	CON	CON_01f_m67_003.xlsx_RoiSetAuto-17.zip Distance px	80	10025.7	1.22949	618.606	16.2069	618.606
CON_01f_m67_003	CON	CON_01f_m67_003.xlsx_RoiSetAuto-19.zip Distance px	56	8562.68	0.745288	618.606	13.8419	618.606
CON_01f_m67_003	CON	CON_01f_m67_003.xlsx_RoiSetAuto-2.zip Distance px	44	8651.99	1.48909	618.606	13.9863	618.606
CON_01f_m67_003	CON	CON_01f_m67_003.xlsx_RoiSetAuto-20.zip Distance px	16	8440.31	0.202098	618.606	13.6441	618.606
CON_01f_m67_003	CON	CON_01f_m67_003.xlsx_RoiSetAuto-21.zip Distance px	48	9157.4	1.30103	618.606	14.8033	618.606
CON_01f_m67_003	CON	CON_01f_m67_003.xlsx_RoiSetAuto-22.zip Distance px	56	11633.1	0.775194	618.606	18.8053	618.606
CON_01f_m67_003	CON	CON_01f_m67_003.xlsx_RoiSetAuto-23.zip Distance px	56	8997.97	0.732897	618.606	14.5456	618.606
CON_01f_m67_003	CON	CON_01f_m67_003.xlsx_RoiSetAuto-24.zip Distance px	20	9482.3	0.486071	618.606	15.3285	618.606
CON_01f_m67_003	CON	CON_01f_m67_003.xlsx_RoiSetAuto-25.zip Distance px	44	7530.83	0.816355	618.606	12.1739	618.606
CON_01f_m67_003	CON	CON_01f_m67_003.xlsx_RoiSetAuto-29.zip Distance px	116	14376.3	1.06996	618.606	23.2399	618.606
CON_01f_m67_003	CON	CON_01f_m67_003.xlsx_RoiSetAuto-3.zip Distance px	116	8239.31	0.770559	618.606	13.3192	618.606
CON_01f_m67_003	CON	CON_01f_m67_003.xlsx_RoiSetAuto-30.zip Distance px	16	7473.32	0.116469	618.606	12.0809	618.606
CON_01f_m67_003	CON	CON_01f_m67_003.xlsx_RoiSetAuto-31.zip Distance px	100	11945	1.01974	618.606	19.3096	618.606
CON_01f_m67_003	CON	CON_01f_m67_003.xlsx_RoiSetAuto-34.zip Distance px	48	9699.62	0.906158	618.606	15.6798	618.606
CON_01f_m67_003	CON	CON_01f_m67_003.xlsx_RoiSetAuto-36.zip Distance px	24	6242.53	0.514907	618.606	10.0913	618.606
CON_01f_m67_003	CON	CON_01f_m67_003.xlsx_RoiSetAuto-37.zip Distance px	16	8097.33	0.799131	618.606	13.0896	618.606
CON_01f_m67_003	CON	CON_01f_m67_003.xlsx_RoiSetAuto-38.zip Distance px	36	9547.62	0.968016	618.606	15.4341	618.606
CON_01f_m67_003	CON	CON_01f_m67_003.xlsx_RoiSetAuto-39.zip Distance px	92	9074.76	0.910934	618.606	14.6697	618.606
CON_01f_m67_003	CON	CON_01f_m67_003.xlsx_RoiSetAuto-4.zip Distance px	56	11385.7	1.18349	618.606	18.4053	618.606
CON_01f_m67_003	CON	CON_01f_m67_003.xlsx_RoiSetAuto-40.zip Distance px	28	8016.82	0.535273	618.606	12.9595	618.606
CON_01f_m67_003	CON	CON_01f_m67_003.xlsx_RoiSetAuto-41.zip Distance px	80	11283.3	1.7731	618.606	18.2399	618.606
CON_01f_m67_003	CON	CON_01f_m67_003.xlsx_RoiSetAuto-42.zip Distance px	28	6871.39	0.428249	618.606	11.1079	618.606
CON_01f_m67_003	CON	CON_01f_m67_003.xlsx_RoiSetAuto-43.zip Distance px	84	11674.9	1.42105	618.606	18.8729	618.606
CON_01f_m67_003	CON	CON_01f_m67_003.xlsx_RoiSetAuto-44.zip Distance px	28	9242.01	0.426506	618.606	14.9401	618.606
CON_01f_m67_003	CON	CON_01f_m67_003.xlsx_RoiSetAuto-45.zip Distance px	20	7431.79	0.667788	618.606	12.0138	618.606
CON_01f_m67_003	CON	CON_01f_m67_003.xlsx_RoiSetAuto-46.zip Distance px	16	10592.2	0.538681	618.606	17.1228	618.606
CON_01f_m67_003	CON	CON_01f_m67_003.xlsx_RoiSetAuto-48.zip Distance px	28	7643.81	0.521346	618.606	12.3565	618.606
CON_01f_m67_003	CON	CON_01f_m67_003.xlsx_RoiSetAuto-49.zip Distance px	152	13412.5	1.1205	618.606	21.6818	618.606
CON_01f_m67_003	CON	CON_01f_m67_003.xlsx_RoiSetAuto-5.zip Distance px	52	11013.3	1.03031	618.606	17.8034	618.606
CON_01f_m67_003	CON	CON_01f_m67_003.xlsx_RoiSetAuto-50.zip Distance px	28	7899.94	0.572197	618.606	12.7706	618.606
CON_01f_m67_003	CON	CON_01f_m67_003.xlsx_RoiSetAuto-53.zip Distance px	32	9786.92	0.341182	618.606	15.8209	618.606
CON_01f_m67_003	CON	CON_01f_m67_003.xlsx_RoiSetAuto-54.zip Distance px	28	16321.1	0.886586	618.606	26.3837	618.606
CON_01f_m67_003	CON	CON_01f_m67_003.xlsx_RoiSetAuto-55.zip Distance px	24	6938.2	0.490536	618.606	11.2159	618.606
CON_01f_m67_003	CON	CON_01f_m67_003.xlsx_RoiSetAuto-56.zip Distance px	20	7745.41	0.630516	618.606	12.5207	618.606
CON_01f_m67_003	CON	CON_01f_m67_003.xlsx_RoiSetAuto-57.zip Distance px	48	10655.2	0.799006	618.606	17.2246	618.606
CON_01f_m67_003	CON	CON_01f_m67_003.xlsx_RoiSetAuto-58.zip Distance px	16	6219.23	0.194057	618.606	10.0536	618.606
CON_01f_m67_003	CON	CON_01f_m67_003.xlsx_RoiSetAuto-59.zip Distance px	28	9555.44	0.833403	618.606	15.4467	618.606
CON_01f_m67_003	CON	CON_01f_m67_003.xlsx_RoiSetAuto-60.zip Distance px	32	8213	0.664987	618.606	13.2766	618.606
CON_01f_m67_003	CON	CON_01f_m67_003.xlsx_RoiSetAuto-61.zip Distance px	28	8578.3	0.525022	618.606	13.8671	618.606
CON_01f_m67_003	CON	CON_01f_m67_003.xlsx_RoiSetAuto-62.zip Distance px	100	10163.5	1.39616	618.606	16.4297	618.606
CON_01f_m67_003	CON	CON_01f_m67_003.xlsx_RoiSetAuto-63.zip Distance px	20	7497.21	0.21806	618.606	12.1195	618.606
CON_01f_m67_003	CON	CON_01f_m67_003.xlsx_RoiSetAuto-65.zip Distance px	28	10039.7	0.793462	618.606	16.2295	618.606
CON_01f_m67_003	CON	CON_01f_m67_003.xlsx_RoiSetAuto-66.zip Distance px	24	7399.51	0.676785	618.606	11.9616	618.606
CON_01f_m67_003	CON	CON_01f_m67_003.xlsx_RoiSetAuto-67.zip Distance px	56	10288.1	0.869699	618.606	16.6312	618.606
CON_01f_m67_003	CON	CON_01f_m67_003.xlsx_RoiSetAuto-68.zip Distance px	52	10244.2	0.613503	618.606	16.5602	618.606
CON_01f_m67_003	CON	CON_01f_m67_003.xlsx_RoiSetAuto-69.zip Distance px	16	8146.51	0.30943	618.606	13.1691	618.606
CON_01f_m67_003	CON	CON_01f_m67_003.xlsx_RoiSetAuto-7.zip Distance px	56	7937.6	0.78937	618.606	12.8314	618.606
CON_01f_m67_003	CON	CON_01f_m67_003.xlsx_RoiSetAuto-70.zip Distance px	36	8938.66	0.634106	618.606	14.4497	618.606
CON_01f_m67_003	CON	CON_01f_m67_003.xlsx_RoiSetAuto-72.zip Distance px	16	8664.89	0.55525	618.606	14.0071	618.606
CON_01f_m67_003	CON	CON_01f_m67_003.xlsx_RoiSetAuto-73.zip Distance px	24	7794.77	0.404937	618.606	12.6006	618.606
CON_01f_m67_003	CON	CON_01f_m67_003.xlsx_RoiSetAuto-74.zip Distance px	68	10318.9	0.7832	618.606	16.6808	618.606
CON_01f_m67_003	CON	CON_01f_m67_003.xlsx_RoiSetAuto-75.zip Distance px	16	8283.16	0.252771	618.606	13.3901	618.606
CON_01f_m67_003	CON	CON_01f_m67_003.xlsx_RoiSetAuto-76.zip Distance px	20	7196.54	0.631494	618.606	11.6335	618.606
CON_01f_m67_003	CON	CON_01f_m67_003.xlsx_RoiSetAuto-77.zip Distance px	20	7778.1	0.237617	618.606	12.5736	618.606
CON_01f_m67_003	CON	CON_01f_m67_003.xlsx_RoiSetAuto-78.zip Distance px	28	8521.84	0.538849	618.606	13.7759	618.606
CON_01f_m67_003	CON	CON_01f_m67_003.xlsx_RoiSetAuto-79.zip Distance px	56	10290.1	0.857727	618.606	16.6344	618.606
CON_01f_m67_003	CON	CON_01f_m67_003.xlsx_RoiSetAuto-8.zip Distance px	16	5776.45	0.337529	618.606	9.33786	618.606
CON_01f_m67_003	CON	CON_01f_m67_003.xlsx_RoiSetAuto-81.zip Distance px	32	8610.97	0.583973	618.606	13.92	618.606
CON_01f_m67_003	CON	CON_01f_m67_003.xlsx_RoiSetAuto-82.zip Distance px	36	9875.9	0.667098	618.606	15.9648	618.606
CON_01f_m67_003	CON	CON_01f_m67_003.xlsx_RoiSetAuto-83.zip Distance px	28	14694.4	0.85204	618.606	23.7541	618.606
CON_01f_m67_003	CON	CON_01f_m67_003.xlsx_RoiSetAuto-84.zip Distance px	16	8033.88	0.285422	618.606	12.9871	618.606
CON_01f_m67_003	CON	CON_01f_m67_003.xlsx_RoiSetAuto-9.zip Distance px	96	10365.3	0.857083	618.606	16.7559	618.606
CON_02f_m67_002	CON	CON_02f_m67_002.xlsx_RoiSetAuto-1.zip Distance px	284	28764.6	1.00167	1412.08	20.3704	1412.08
CON_02f_m67_002	CON	CON_02f_m67_002.xlsx_RoiSetAuto-10.zip Distance px	40	22646.7	0.620698	1412.08	16.0379	1412.08
CON_02f_m67_002	CON	CON_02f_m67_002.xlsx_RoiSetAuto-11.zip Distance px	32	14561.5	0.25438	1412.08	10.3121	1412.08
CON_02f_m67_002	CON	CON_02f_m67_002.xlsx_RoiSetAuto-12.zip Distance px	76	22522.5	0.794514	1412.08	15.9499	1412.08
CON_02f_m67_002	CON	CON_02f_m67_002.xlsx_RoiSetAuto-13.zip Distance px	52	24128.5	0.923149	1412.08	17.0872	1412.08
CON_02f_m67_002	CON	CON_02f_m67_002.xlsx_RoiSetAuto-14.zip Distance px	56	22487.1	0.734559	1412.08	15.9248	1412.08
CON_02f_m67_002	CON	CON_02f_m67_002.xlsx_RoiSetAuto-15.zip Distance px	36	18588.2	0.524137	1412.08	13.1637	1412.08
CON_02f_m67_002	CON	CON_02f_m67_002.xlsx_RoiSetAuto-16.zip Distance px	36	22149.4	0.628678	1412.08	15.6857	1412.08
CON_02f_m67_002	CON	CON_02f_m67_002.xlsx_RoiSetAuto-17.zip Distance px	16	20813.7	0.357047	1412.08	14.7398	1412.08
CON_02f_m67_002	CON	CON_02f_m67_002.xlsx_RoiSetAuto-18.zip Distance px	20	22549.8	0.247279	1412.08	15.9693	1412.08
CON_02f_m67_002	CON	CON_02f_m67_002.xlsx_RoiSetAuto-2.zip Distance px	204	27122.9	1.07485	1412.08	19.2078	1412.08
CON_02f_m67_002	CON	CON_02f_m67_002.xlsx_RoiSetAuto-3.zip Distance px	16	13584.3	0.424271	1412.08	9.6201	1412.08
CON_02f_m67_002	CON	CON_02f_m67_002.xlsx_RoiSetAuto-5.zip Distance px	20	18979.6	0.495979	1412.08	13.4409	1412.08
CON_02f_m67_002	CON	CON_02f_m67_002.xlsx_RoiSetAuto-6.zip Distance px	76	17037.8	0.662077	1412.08	12.0658	1412.08
CON_02f_m67_002	CON	CON_02f_m67_002.xlsx_RoiSetAuto-7.zip Distance px	16	18381.8	0.226877	1412.08	13.0176	1412.08
CON_02f_m67_002	CON	CON_02f_m67_002.xlsx_RoiSetAuto-8.zip Distance px	16	16719.3	0.653735	1412.08	11.8402	1412.08
CON_02f_m67_002	CON	CON_02f_m67_002.xlsx_RoiSetAuto-9.zip Distance px	32	15548.5	0.500009	1412.08	11.0111	1412.08
CON_03f_m67_001	CON	CON_03f_m67_001.xlsx_RoiSetAuto-1.zip Distance px	264	16715.2	0.854265	825.534	20.2478	825.534
CON_03f_m67_001	CON	CON_03f_m67_001.xlsx_RoiSetAuto-10.zip Distance px	40	13162.6	0.485183	825.534	15.9444	825.534
CON_03f_m67_001	CON	CON_03f_m67_001.xlsx_RoiSetAuto-100.zip Distance px	32	8895.39	0.401689	825.534	10.7753	825.534
CON_03f_m67_001	CON	CON_03f_m67_001.xlsx_RoiSetAuto-101.zip Distance px	16	11795.6	0.602823	825.534	14.2884	825.534
CON_03f_m67_001	CON	CON_03f_m67_001.xlsx_RoiSetAuto-102.zip Distance px	28	9178.96	0.443442	825.534	11.1188	825.534
CON_03f_m67_001	CON	CON_03f_m67_001.xlsx_RoiSetAuto-103.zip Distance px	80	10423.4	0.518715	825.534	12.6263	825.534
CON_03f_m67_001	CON	CON_03f_m67_001.xlsx_RoiSetAuto-104.zip Distance px	40	9325.51	0.661662	825.534	11.2963	825.534
CON_03f_m67_001	CON	CON_03f_m67_001.xlsx_RoiSetAuto-105.zip Distance px	68	12133.4	0.807751	825.534	14.6976	825.534
CON_03f_m67_001	CON	CON_03f_m67_001.xlsx_RoiSetAuto-106.zip Distance px	24	8147.49	0.446226	825.534	9.86935	825.534
CON_03f_m67_001	CON	CON_03f_m67_001.xlsx_RoiSetAuto-107.zip Distance px	136	11313.8	0.848697	825.534	13.7049	825.534
CON_03f_m67_001	CON	CON_03f_m67_001.xlsx_RoiSetAuto-108.zip Distance px	16	7928.65	0.471581	825.534	9.60427	825.534
CON_03f_m67_001	CON	CON_03f_m67_001.xlsx_RoiSetAuto-109.zip Distance px	44	9761.39	0.624937	825.534	11.8243	825.534
CON_03f_m67_001	CON	CON_03f_m67_001.xlsx_RoiSetAuto-11.zip Distance px	32	10295.3	0.367393	825.534	12.471	825.534
CON_03f_m67_001	CON	CON_03f_m67_001.xlsx_RoiSetAuto-110.zip Distance px	16	10676.1	0.633986	825.534	12.9323	825.534
CON_03f_m67_001	CON	CON_03f_m67_001.xlsx_RoiSetAuto-111.zip Distance px	16	8184.84	0.588178	825.534	9.91459	825.534
CON_03f_m67_001	CON	CON_03f_m67_001.xlsx_RoiSetAuto-112.zip Distance px	40	9479.2	0.330196	825.534	11.4825	825.534
CON_03f_m67_001	CON	CON_03f_m67_001.xlsx_RoiSetAuto-113.zip Distance px	24	8168.21	0.224623	825.534	9.89445	825.534
CON_03f_m67_001	CON	CON_03f_m67_001.xlsx_RoiSetAuto-114.zip Distance px	24	9918.17	0.587908	825.534	12.0142	825.534
CON_03f_m67_001	CON	CON_03f_m67_001.xlsx_RoiSetAuto-115.zip Distance px	20	7388.66	0.172374	825.534	8.95016	825.534
CON_03f_m67_001	CON	CON_03f_m67_001.xlsx_RoiSetAuto-116.zip Distance px	32	8886.12	0.263666	825.534	10.7641	825.534
CON_03f_m67_001	CON	CON_03f_m67_001.xlsx_RoiSetAuto-117.zip Distance px	20	7050.36	0.236877	825.534	8.54035	825.534
CON_03f_m67_001	CON	CON_03f_m67_001.xlsx_RoiSetAuto-118.zip Distance px	68	9033.62	0.621479	825.534	10.9428	825.534
CON_03f_m67_001	CON	CON_03f_m67_001.xlsx_RoiSetAuto-119.zip Distance px	16	8421.31	0.622991	825.534	10.201	825.534
CON_03f_m67_001	CON	CON_03f_m67_001.xlsx_RoiSetAuto-12.zip Distance px	40	9566.9	0.785888	825.534	11.5887	825.534
CON_03f_m67_001	CON	CON_03f_m67_001.xlsx_RoiSetAuto-120.zip Distance px	16	10423.4	0.643262	825.534	12.6263	825.534
CON_03f_m67_001	CON	CON_03f_m67_001.xlsx_RoiSetAuto-121.zip Distance px	136	12333.8	1.33404	825.534	14.9403	825.534
CON_03f_m67_001	CON	CON_03f_m67_001.xlsx_RoiSetAuto-122.zip Distance px	52	11261.1	0.691074	825.534	13.641	825.534
CON_03f_m67_001	CON	CON_03f_m67_001.xlsx_RoiSetAuto-123.zip Distance px	104	10541.5	0.874228	825.534	12.7693	825.534
CON_03f_m67_001	CON	CON_03f_m67_001.xlsx_RoiSetAuto-124.zip Distance px	16	8129.32	0.230557	825.534	9.84734	825.534
CON_03f_m67_001	CON	CON_03f_m67_001.xlsx_RoiSetAuto-125.zip Distance px	16	8844.02	0.111036	825.534	10.7131	825.534
CON_03f_m67_001	CON	CON_03f_m67_001.xlsx_RoiSetAuto-126.zip Distance px	104	14520.2	1.02852	825.534	17.5888	825.534
CON_03f_m67_001	CON	CON_03f_m67_001.xlsx_RoiSetAuto-127.zip Distance px	116	10552	0.558157	825.534	12.7821	825.534
CON_03f_m67_001	CON	CON_03f_m67_001.xlsx_RoiSetAuto-128.zip Distance px	24	10527.7	0.330785	825.534	12.7525	825.534
CON_03f_m67_001	CON	CON_03f_m67_001.xlsx_RoiSetAuto-129.zip Distance px	32	10482.5	0.658685	825.534	12.6978	825.534
CON_03f_m67_001	CON	CON_03f_m67_001.xlsx_RoiSetAuto-13.zip Distance px	88	18390.9	1.62991	825.534	22.2775	825.534
CON_03f_m67_001	CON	CON_03f_m67_001.xlsx_RoiSetAuto-131.zip Distance px	84	15439.8	0.838231	825.534	18.7028	825.534
CON_03f_m67_001	CON	CON_03f_m67_001.xlsx_RoiSetAuto-133.zip Distance px	16	7617.65	0.263006	825.534	9.22754	825.534
CON_03f_m67_001	CON	CON_03f_m67_001.xlsx_RoiSetAuto-134.zip Distance px	48	10150.5	0.682462	825.534	12.2957	825.534
CON_03f_m67_001	CON	CON_03f_m67_001.xlsx_RoiSetAuto-135.zip Distance px	24	9708.79	0.265776	825.534	11.7606	825.534
CON_03f_m67_001	CON	CON_03f_m67_001.xlsx_RoiSetAuto-136.zip Distance px	44	10904.7	0.536009	825.534	13.2093	825.534
CON_03f_m67_001	CON	CON_03f_m67_001.xlsx_RoiSetAuto-137.zip Distance px	20	8091.68	0.36498	825.534	9.80174	825.534
CON_03f_m67_001	CON	CON_03f_m67_001.xlsx_RoiSetAuto-138.zip Distance px	16	8123.4	0.423327	825.534	9.84017	825.534
CON_03f_m67_001	CON	CON_03f_m67_001.xlsx_RoiSetAuto-139.zip Distance px	16	9765.95	0.309775	825.534	11.8298	825.534
CON_03f_m67_001	CON	CON_03f_m67_001.xlsx_RoiSetAuto-14.zip Distance px	36	8693.91	0.709454	825.534	10.5313	825.534
CON_03f_m67_001	CON	CON_03f_m67_001.xlsx_RoiSetAuto-140.zip Distance px	16	8206.28	0.562874	825.534	9.94057	825.534
CON_03f_m67_001	CON	CON_03f_m67_001.xlsx_RoiSetAuto-141.zip Distance px	20	9380.68	0.493059	825.534	11.3632	825.534
CON_03f_m67_001	CON	CON_03f_m67_001.xlsx_RoiSetAuto-142.zip Distance px	20	9225.46	0.361779	825.534	11.1751	825.534
CON_03f_m67_001	CON	CON_03f_m67_001.xlsx_RoiSetAuto-143.zip Distance px	72	11873	0.744097	825.534	14.3822	825.534
CON_03f_m67_001	CON	CON_03f_m67_001.xlsx_RoiSetAuto-144.zip Distance px	48	10089.3	0.528393	825.534	12.2215	825.534
CON_03f_m67_001	CON	CON_03f_m67_001.xlsx_RoiSetAuto-145.zip Distance px	24	10440.4	0.395374	825.534	12.6469	825.534
CON_03f_m67_001	CON	CON_03f_m67_001.xlsx_RoiSetAuto-146.zip Distance px	28	10870	0.653087	825.534	13.1673	825.534
CON_03f_m67_001	CON	CON_03f_m67_001.xlsx_RoiSetAuto-147.zip Distance px	24	9615.3	0.313174	825.534	11.6474	825.534
CON_03f_m67_001	CON	CON_03f_m67_001.xlsx_RoiSetAuto-148.zip Distance px	24	11806.1	0.561842	825.534	14.3012	825.534
CON_03f_m67_001	CON	CON_03f_m67_001.xlsx_RoiSetAuto-149.zip Distance px	28	9693.92	0.61515	825.534	11.7426	825.534
CON_03f_m67_001	CON	CON_03f_m67_001.xlsx_RoiSetAuto-15.zip Distance px	24	9399.74	0.315616	825.534	11.3862	825.534
CON_03f_m67_001	CON	CON_03f_m67_001.xlsx_RoiSetAuto-151.zip Distance px	40	10118.7	0.57986	825.534	12.2571	825.534
CON_03f_m67_001	CON	CON_03f_m67_001.xlsx_RoiSetAuto-152.zip Distance px	24	9297.57	0.209921	825.534	11.2625	825.534
CON_03f_m67_001	CON	CON_03f_m67_001.xlsx_RoiSetAuto-153.zip Distance px	20	9965.06	0.304572	825.534	12.071	825.534
CON_03f_m67_001	CON	CON_03f_m67_001.xlsx_RoiSetAuto-154.zip Distance px	36	8315.48	0.579558	825.534	10.0728	825.534
CON_03f_m67_001	CON	CON_03f_m67_001.xlsx_RoiSetAuto-155.zip Distance px	32	8881.78	0.330135	825.534	10.7588	825.534
CON_03f_m67_001	CON	CON_03f_m67_001.xlsx_RoiSetAuto-156.zip Distance px	32	11040.8	0.197115	825.534	13.3742	825.534
CON_03f_m67_001	CON	CON_03f_m67_001.xlsx_RoiSetAuto-157.zip Distance px	24	9296.87	0.313238	825.534	11.2616	825.534
CON_03f_m67_001	CON	CON_03f_m67_001.xlsx_RoiSetAuto-158.zip Distance px	32	9343.32	0.373861	825.534	11.3179	825.534
CON_03f_m67_001	CON	CON_03f_m67_001.xlsx_RoiSetAuto-159.zip Distance px	24	10616.8	0.542691	825.534	12.8605	825.534
CON_03f_m67_001	CON	CON_03f_m67_001.xlsx_RoiSetAuto-16.zip Distance px	24	10802.5	0.312921	825.534	13.0855	825.534
CON_03f_m67_001	CON	CON_03f_m67_001.xlsx_RoiSetAuto-160.zip Distance px	20	9678.02	0.18284	825.534	11.7233	825.534
CON_03f_m67_001	CON	CON_03f_m67_001.xlsx_RoiSetAuto-161.zip Distance px	28	12424.2	0.974831	825.534	15.0499	825.534
CON_03f_m67_001	CON	CON_03f_m67_001.xlsx_RoiSetAuto-162.zip Distance px	24	10851.3	0.749021	825.534	13.1446	825.534
CON_03f_m67_001	CON	CON_03f_m67_001.xlsx_RoiSetAuto-163.zip Distance px	24	10185.7	0.607967	825.534	12.3383	825.534
CON_03f_m67_001	CON	CON_03f_m67_001.xlsx_RoiSetAuto-164.zip Distance px	24	11829.1	0.301367	825.534	14.329	825.534
CON_03f_m67_001	CON	CON_03f_m67_001.xlsx_RoiSetAuto-165.zip Distance px	24	10899	0.504024	825.534	13.2023	825.534
CON_03f_m67_001	CON	CON_03f_m67_001.xlsx_RoiSetAuto-166.zip Distance px	16	7864.4	0.170065	825.534	9.52644	825.534
CON_03f_m67_001	CON	CON_03f_m67_001.xlsx_RoiSetAuto-167.zip Distance px	20	8689.81	0.497998	825.534	10.5263	825.534
CON_03f_m67_001	CON	CON_03f_m67_001.xlsx_RoiSetAuto-17.zip Distance px	16	6236.13	0.388885	825.534	7.55405	825.534
CON_03f_m67_001	CON	CON_03f_m67_001.xlsx_RoiSetAuto-18.zip Distance px	340	17149.5	1.22316	825.534	20.7738	825.534
CON_03f_m67_001	CON	CON_03f_m67_001.xlsx_RoiSetAuto-19.zip Distance px	72	12263.7	0.756001	825.534	14.8554	825.534
CON_03f_m67_001	CON	CON_03f_m67_001.xlsx_RoiSetAuto-2.zip Distance px	56	13627.6	0.802138	825.534	16.5076	825.534
CON_03f_m67_001	CON	CON_03f_m67_001.xlsx_RoiSetAuto-20.zip Distance px	64	20663.1	1.16979	825.534	25.03	825.534
CON_03f_m67_001	CON	CON_03f_m67_001.xlsx_RoiSetAuto-21.zip Distance px	120	14208.7	1.08147	825.534	17.2116	825.534
CON_03f_m67_001	CON	CON_03f_m67_001.xlsx_RoiSetAuto-22.zip Distance px	36	11205.2	0.210663	825.534	13.5732	825.534
CON_03f_m67_001	CON	CON_03f_m67_001.xlsx_RoiSetAuto-23.zip Distance px	40	14946.4	0.909158	825.534	18.1052	825.534
CON_03f_m67_001	CON	CON_03f_m67_001.xlsx_RoiSetAuto-24.zip Distance px	32	12994.2	0.610651	825.534	15.7403	825.534
CON_03f_m67_001	CON	CON_03f_m67_001.xlsx_RoiSetAuto-26.zip Distance px	48	12001.8	0.940704	825.534	14.5383	825.534
CON_03f_m67_001	CON	CON_03f_m67_001.xlsx_RoiSetAuto-27.zip Distance px	136	24997.3	0.594458	825.534	30.2802	825.534
CON_03f_m67_001	CON	CON_03f_m67_001.xlsx_RoiSetAuto-28.zip Distance px	52	10171.6	0.586763	825.534	12.3213	825.534
CON_03f_m67_001	CON	CON_03f_m67_001.xlsx_RoiSetAuto-29.zip Distance px	228	11360.2	0.999479	825.534	13.761	825.534
CON_03f_m67_001	CON	CON_03f_m67_001.xlsx_RoiSetAuto-3.zip Distance px	84	9867.11	0.691356	825.534	11.9524	825.534
CON_03f_m67_001	CON	CON_03f_m67_001.xlsx_RoiSetAuto-30.zip Distance px	76	14955.7	0.638503	825.534	18.1163	825.534
CON_03f_m67_001	CON	CON_03f_m67_001.xlsx_RoiSetAuto-31.zip Distance px	56	15541.2	1.04547	825.534	18.8256	825.534
CON_03f_m67_001	CON	CON_03f_m67_001.xlsx_RoiSetAuto-32.zip Distance px	24	8346.52	0.369164	825.534	10.1104	825.534
CON_03f_m67_001	CON	CON_03f_m67_001.xlsx_RoiSetAuto-33.zip Distance px	68	16785.2	0.983528	825.534	20.3325	825.534
CON_03f_m67_001	CON	CON_03f_m67_001.xlsx_RoiSetAuto-34.zip Distance px	24	12625.9	0.624723	825.534	15.2942	825.534
CON_03f_m67_001	CON	CON_03f_m67_001.xlsx_RoiSetAuto-35.zip Distance px	16	7124.75	0.379112	825.534	8.63047	825.534
CON_03f_m67_001	CON	CON_03f_m67_001.xlsx_RoiSetAuto-36.zip Distance px	20	7406.6	0.457143	825.534	8.97189	825.534
CON_03f_m67_001	CON	CON_03f_m67_001.xlsx_RoiSetAuto-37.zip Distance px	40	10991	1.17143	825.534	13.3138	825.534
CON_03f_m67_001	CON	CON_03f_m67_001.xlsx_RoiSetAuto-38.zip Distance px	48	11188.1	0.700169	825.534	13.5525	825.534
CON_03f_m67_001	CON	CON_03f_m67_001.xlsx_RoiSetAuto-39.zip Distance px	16	7855.51	0.260991	825.534	9.51567	825.534
CON_03f_m67_001	CON	CON_03f_m67_001.xlsx_RoiSetAuto-4.zip Distance px	44	10469.7	0.748642	825.534	12.6824	825.534
CON_03f_m67_001	CON	CON_03f_m67_001.xlsx_RoiSetAuto-40.zip Distance px	16	6306.69	0.433996	825.534	7.63952	825.534
CON_03f_m67_001	CON	CON_03f_m67_001.xlsx_RoiSetAuto-41.zip Distance px	32	10103.1	0.606041	825.534	12.2382	825.534
CON_03f_m67_001	CON	CON_03f_m67_001.xlsx_RoiSetAuto-42.zip Distance px	44	7961.1	0.619804	825.534	9.64357	825.534
CON_03f_m67_001	CON	CON_03f_m67_001.xlsx_RoiSetAuto-43.zip Distance px	20	8358.51	0.433211	825.534	10.125	825.534
CON_03f_m67_001	CON	CON_03f_m67_001.xlsx_RoiSetAuto-44.zip Distance px	16	6573	0.307143	825.534	7.96211	825.534
CON_03f_m67_001	CON	CON_03f_m67_001.xlsx_RoiSetAuto-45.zip Distance px	104	11128.7	0.894567	825.534	13.4806	825.534
CON_03f_m67_001	CON	CON_03f_m67_001.xlsx_RoiSetAuto-46.zip Distance px	64	15619.4	1.03229	825.534	18.9204	825.534
CON_03f_m67_001	CON	CON_03f_m67_001.xlsx_RoiSetAuto-47.zip Distance px	28	10916.9	0.483344	825.534	13.2241	825.534
CON_03f_m67_001	CON	CON_03f_m67_001.xlsx_RoiSetAuto-48.zip Distance px	16	7322.12	0.260215	825.534	8.86955	825.534
CON_03f_m67_001	CON	CON_03f_m67_001.xlsx_RoiSetAuto-50.zip Distance px	76	15720.6	1.03751	825.534	19.0429	825.534
CON_03f_m67_001	CON	CON_03f_m67_001.xlsx_RoiSetAuto-51.zip Distance px	24	12461.7	0.709033	825.534	15.0953	825.534
CON_03f_m67_001	CON	CON_03f_m67_001.xlsx_RoiSetAuto-52.zip Distance px	20	8707.33	0.756602	825.534	10.5475	825.534
CON_03f_m67_001	CON	CON_03f_m67_001.xlsx_RoiSetAuto-53.zip Distance px	28	10015.2	0.582737	825.534	12.1318	825.534
CON_03f_m67_001	CON	CON_03f_m67_001.xlsx_RoiSetAuto-54.zip Distance px	60	11832.8	1.08909	825.534	14.3335	825.534
CON_03f_m67_001	CON	CON_03f_m67_001.xlsx_RoiSetAuto-55.zip Distance px	32	10231.1	0.624042	825.534	12.3933	825.534
CON_03f_m67_001	CON	CON_03f_m67_001.xlsx_RoiSetAuto-56.zip Distance px	44	12472.7	0.493396	825.534	15.1087	825.534
CON_03f_m67_001	CON	CON_03f_m67_001.xlsx_RoiSetAuto-57.zip Distance px	36	11826.1	0.634386	825.534	14.3254	825.534
CON_03f_m67_001	CON	CON_03f_m67_001.xlsx_RoiSetAuto-58.zip Distance px	88	13106.7	0.981722	825.534	15.8766	825.534
CON_03f_m67_001	CON	CON_03f_m67_001.xlsx_RoiSetAuto-59.zip Distance px	24	8454.06	0.783523	825.534	10.2407	825.534
CON_03f_m67_001	CON	CON_03f_m67_001.xlsx_RoiSetAuto-6.zip Distance px	40	9537.44	0.816573	825.534	11.553	825.534
CON_03f_m67_001	CON	CON_03f_m67_001.xlsx_RoiSetAuto-60.zip Distance px	44	12019.6	0.753687	825.534	14.5598	825.534
CON_03f_m67_001	CON	CON_03f_m67_001.xlsx_RoiSetAuto-61.zip Distance px	104	14360.8	1.08174	825.534	17.3957	825.534
CON_03f_m67_001	CON	CON_03f_m67_001.xlsx_RoiSetAuto-62.zip Distance px	32	7743.21	0.311654	825.534	9.37963	825.534
CON_03f_m67_001	CON	CON_03f_m67_001.xlsx_RoiSetAuto-63.zip Distance px	16	9370.17	0.709523	825.534	11.3504	825.534
CON_03f_m67_001	CON	CON_03f_m67_001.xlsx_RoiSetAuto-64.zip Distance px	24	9429	0.164938	825.534	11.4217	825.534
CON_03f_m67_001	CON	CON_03f_m67_001.xlsx_RoiSetAuto-65.zip Distance px	36	8047.76	0.409653	825.534	9.74855	825.534
CON_03f_m67_001	CON	CON_03f_m67_001.xlsx_RoiSetAuto-66.zip Distance px	44	9904.17	0.701134	825.534	11.9973	825.534
CON_03f_m67_001	CON	CON_03f_m67_001.xlsx_RoiSetAuto-67.zip Distance px	48	12080.8	0.865327	825.534	14.634	825.534
CON_03f_m67_001	CON	CON_03f_m67_001.xlsx_RoiSetAuto-68.zip Distance px	44	11128.8	0.703721	825.534	13.4807	825.534
CON_03f_m67_001	CON	CON_03f_m67_001.xlsx_RoiSetAuto-69.zip Distance px	32	10199.1	0.344276	825.534	12.3545	825.534
CON_03f_m67_001	CON	CON_03f_m67_001.xlsx_RoiSetAuto-7.zip Distance px	48	7660.89	0.66094	825.534	9.27992	825.534
CON_03f_m67_001	CON	CON_03f_m67_001.xlsx_RoiSetAuto-70.zip Distance px	20	9333.24	0.441502	825.534	11.3057	825.534
CON_03f_m67_001	CON	CON_03f_m67_001.xlsx_RoiSetAuto-71.zip Distance px	128	11448.2	0.793082	825.534	13.8677	825.534
CON_03f_m67_001	CON	CON_03f_m67_001.xlsx_RoiSetAuto-72.zip Distance px	44	13714	1.04321	825.534	16.6122	825.534
CON_03f_m67_001	CON	CON_03f_m67_001.xlsx_RoiSetAuto-73.zip Distance px	164	13189.6	1.18015	825.534	15.9771	825.534
CON_03f_m67_001	CON	CON_03f_m67_001.xlsx_RoiSetAuto-74.zip Distance px	36	8989.73	0.567564	825.534	10.8896	825.534
CON_03f_m67_001	CON	CON_03f_m67_001.xlsx_RoiSetAuto-75.zip Distance px	28	11989.2	0.638294	825.534	14.5229	825.534
CON_03f_m67_001	CON	CON_03f_m67_001.xlsx_RoiSetAuto-76.zip Distance px	76	10889.1	0.744406	825.534	13.1904	825.534
CON_03f_m67_001	CON	CON_03f_m67_001.xlsx_RoiSetAuto-77.zip Distance px	16	7548.76	0.165601	825.534	9.14408	825.534
CON_03f_m67_001	CON	CON_03f_m67_001.xlsx_RoiSetAuto-78.zip Distance px	16	10263	0.381363	825.534	12.432	825.534
CON_03f_m67_001	CON	CON_03f_m67_001.xlsx_RoiSetAuto-79.zip Distance px	64	10318.8	0.497016	825.534	12.4995	825.534
CON_03f_m67_001	CON	CON_03f_m67_001.xlsx_RoiSetAuto-8.zip Distance px	20	12305.9	0.823556	825.534	14.9066	825.534
CON_03f_m67_001	CON	CON_03f_m67_001.xlsx_RoiSetAuto-80.zip Distance px	40	9745.96	0.538045	825.534	11.8056	825.534
CON_03f_m67_001	CON	CON_03f_m67_001.xlsx_RoiSetAuto-81.zip Distance px	20	9364.52	0.520274	825.534	11.3436	825.534
CON_03f_m67_001	CON	CON_03f_m67_001.xlsx_RoiSetAuto-82.zip Distance px	16	8056.5	0.392726	825.534	9.75914	825.534
CON_03f_m67_001	CON	CON_03f_m67_001.xlsx_RoiSetAuto-83.zip Distance px	140	19996.6	1.3725	825.534	24.2227	825.534
CON_03f_m67_001	CON	CON_03f_m67_001.xlsx_RoiSetAuto-84.zip Distance px	32	9345.98	0.34714	825.534	11.3211	825.534
CON_03f_m67_001	CON	CON_03f_m67_001.xlsx_RoiSetAuto-85.zip Distance px	52	10439.4	1.18703	825.534	12.6456	825.534
CON_03f_m67_001	CON	CON_03f_m67_001.xlsx_RoiSetAuto-86.zip Distance px	16	9288.83	0.238599	825.534	11.2519	825.534
CON_03f_m67_001	CON	CON_03f_m67_001.xlsx_RoiSetAuto-87.zip Distance px	120	14435.6	1.40572	825.534	17.4864	825.534
CON_03f_m67_001	CON	CON_03f_m67_001.xlsx_RoiSetAuto-88.zip Distance px	140	16341.3	0.958981	825.534	19.7948	825.534
CON_03f_m67_001	CON	CON_03f_m67_001.xlsx_RoiSetAuto-89.zip Distance px	44	9692.06	0.852729	825.534	11.7403	825.534
CON_03f_m67_001	CON	CON_03f_m67_001.xlsx_RoiSetAuto-9.zip Distance px	20	9328.89	0.691122	825.534	11.3004	825.534
CON_03f_m67_001	CON	CON_03f_m67_001.xlsx_RoiSetAuto-90.zip Distance px	16	7798.73	0.427242	825.534	9.44689	825.534
CON_03f_m67_001	CON	CON_03f_m67_001.xlsx_RoiSetAuto-91.zip Distance px	72	10083.9	1.1037	825.534	12.215	825.534
CON_03f_m67_001	CON	CON_03f_m67_001.xlsx_RoiSetAuto-92.zip Distance px	32	9199.74	0.640888	825.534	11.144	825.534
CON_03f_m67_001	CON	CON_03f_m67_001.xlsx_RoiSetAuto-93.zip Distance px	20	9149.49	0.422064	825.534	11.0831	825.534
CON_03f_m67_001	CON	CON_03f_m67_001.xlsx_RoiSetAuto-94.zip Distance px	20	8735.47	0.220779	825.534	10.5816	825.534
CON_03f_m67_001	CON	CON_03f_m67_001.xlsx_RoiSetAuto-95.zip Distance px	20	16065.2	0.621477	825.534	19.4603	825.534
CON_03f_m67_001	CON	CON_03f_m67_001.xlsx_RoiSetAuto-96.zip Distance px	40	10445.6	0.680949	825.534	12.6532	825.534
CON_03f_m67_001	CON	CON_03f_m67_001.xlsx_RoiSetAuto-97.zip Distance px	124	12578.4	0.804066	825.534	15.2367	825.534
CON_03f_m67_001	CON	CON_03f_m67_001.xlsx_RoiSetAuto-98.zip Distance px	52	9508.28	0.459208	825.534	11.5177	825.534
CON_03f_m67_001	CON	CON_03f_m67_001.xlsx_RoiSetAuto-99.zip Distance px	24	9326.59	0.545557	825.534	11.2976	825.534
CON_03f_m67_002	CON	CON_03f_m67_002.xlsx_RoiSetAuto-1.zip Distance px	60	3506.39	0.648746	285.081	12.2996	285.081
CON_03f_m67_002	CON	CON_03f_m67_002.xlsx_RoiSetAuto-10.zip Distance px	28	3649.65	0.472629	285.081	12.8021	285.081
CON_03f_m67_002	CON	CON_03f_m67_002.xlsx_RoiSetAuto-11.zip Distance px	48	3598.67	1.23384	285.081	12.6233	285.081
CON_03f_m67_002	CON	CON_03f_m67_002.xlsx_RoiSetAuto-12.zip Distance px	72	4543.45	1.17782	285.081	15.9374	285.081
CON_03f_m67_002	CON	CON_03f_m67_002.xlsx_RoiSetAuto-13.zip Distance px	52	4511.49	1.09854	285.081	15.8253	285.081
CON_03f_m67_002	CON	CON_03f_m67_002.xlsx_RoiSetAuto-14.zip Distance px	28	3199.5	0.792446	285.081	11.2231	285.081
CON_03f_m67_002	CON	CON_03f_m67_002.xlsx_RoiSetAuto-15.zip Distance px	84	4526.8	1.30652	285.081	15.879	285.081
CON_03f_m67_002	CON	CON_03f_m67_002.xlsx_RoiSetAuto-17.zip Distance px	20	3553.87	0.765469	285.081	12.4662	285.081
CON_03f_m67_002	CON	CON_03f_m67_002.xlsx_RoiSetAuto-18.zip Distance px	108	4021.79	1.17766	285.081	14.1075	285.081
CON_03f_m67_002	CON	CON_03f_m67_002.xlsx_RoiSetAuto-19.zip Distance px	56	3576.65	0.712337	285.081	12.5461	285.081
CON_03f_m67_002	CON	CON_03f_m67_002.xlsx_RoiSetAuto-2.zip Distance px	84	7025.63	1.06884	285.081	24.6443	285.081
CON_03f_m67_002	CON	CON_03f_m67_002.xlsx_RoiSetAuto-21.zip Distance px	40	3442.64	0.834012	285.081	12.076	285.081
CON_03f_m67_002	CON	CON_03f_m67_002.xlsx_RoiSetAuto-22.zip Distance px	40	3443.15	0.831561	285.081	12.0778	285.081
CON_03f_m67_002	CON	CON_03f_m67_002.xlsx_RoiSetAuto-23.zip Distance px	64	4967.29	1.01991	285.081	17.4241	285.081
CON_03f_m67_002	CON	CON_03f_m67_002.xlsx_RoiSetAuto-24.zip Distance px	16	3816.45	1.16858	285.081	13.3873	285.081
CON_03f_m67_002	CON	CON_03f_m67_002.xlsx_RoiSetAuto-25.zip Distance px	20	3731.08	0.370322	285.081	13.0878	285.081
CON_03f_m67_002	CON	CON_03f_m67_002.xlsx_RoiSetAuto-27.zip Distance px	28	4392.62	0.510483	285.081	15.4083	285.081
CON_03f_m67_002	CON	CON_03f_m67_002.xlsx_RoiSetAuto-28.zip Distance px	16	3436.67	0.719198	285.081	12.0551	285.081
CON_03f_m67_002	CON	CON_03f_m67_002.xlsx_RoiSetAuto-3.zip Distance px	64	4141.58	0.881302	285.081	14.5277	285.081
CON_03f_m67_002	CON	CON_03f_m67_002.xlsx_RoiSetAuto-4.zip Distance px	124	4652.97	1.25091	285.081	16.3216	285.081
CON_03f_m67_002	CON	CON_03f_m67_002.xlsx_RoiSetAuto-5.zip Distance px	16	2925.18	0.813068	285.081	10.2609	285.081
CON_03f_m67_002	CON	CON_03f_m67_002.xlsx_RoiSetAuto-6.zip Distance px	52	5418.15	1.12273	285.081	19.0056	285.081
CON_03f_m67_002	CON	CON_03f_m67_002.xlsx_RoiSetAuto-7.zip Distance px	40	3420.39	0.513416	285.081	11.9979	285.081
CON_03f_m67_002	CON	CON_03f_m67_002.xlsx_RoiSetAuto-8.zip Distance px	56	3929.25	1.08922	285.081	13.7829	285.081
CON_03f_m67_002	CON	CON_03f_m67_002.xlsx_RoiSetAuto-9.zip Distance px	24	3283.63	0.281256	285.081	11.5182	285.081
CON_03f_m67_003	CON	CON_03f_m67_003.xlsx_RoiSetAuto-1.zip Distance px	20	15177.9	0.726266	610.563	24.8589	610.563
CON_03f_m67_003	CON	CON_03f_m67_003.xlsx_RoiSetAuto-100.zip Distance px	20	8232.81	0.548054	610.563	13.484	610.563
CON_03f_m67_003	CON	CON_03f_m67_003.xlsx_RoiSetAuto-101.zip Distance px	48	12623.4	0.697456	610.563	20.675	610.563
CON_03f_m67_003	CON	CON_03f_m67_003.xlsx_RoiSetAuto-102.zip Distance px	24	8621.23	0.69101	610.563	14.1201	610.563
CON_03f_m67_003	CON	CON_03f_m67_003.xlsx_RoiSetAuto-103.zip Distance px	60	8644.66	0.511467	610.563	14.1585	610.563
CON_03f_m67_003	CON	CON_03f_m67_003.xlsx_RoiSetAuto-104.zip Distance px	16	8041.96	0.238877	610.563	13.1714	610.563
CON_03f_m67_003	CON	CON_03f_m67_003.xlsx_RoiSetAuto-105.zip Distance px	16	8560.97	0.404654	610.563	14.0214	610.563
CON_03f_m67_003	CON	CON_03f_m67_003.xlsx_RoiSetAuto-106.zip Distance px	32	8877.14	0.533917	610.563	14.5393	610.563
CON_03f_m67_003	CON	CON_03f_m67_003.xlsx_RoiSetAuto-107.zip Distance px	28	7809.79	0.224909	610.563	12.7911	610.563
CON_03f_m67_003	CON	CON_03f_m67_003.xlsx_RoiSetAuto-108.zip Distance px	16	7489.29	0.118443	610.563	12.2662	610.563
CON_03f_m67_003	CON	CON_03f_m67_003.xlsx_RoiSetAuto-109.zip Distance px	28	7686.95	0.50928	610.563	12.5899	610.563
CON_03f_m67_003	CON	CON_03f_m67_003.xlsx_RoiSetAuto-11.zip Distance px	72	9155.38	0.788189	610.563	14.995	610.563
CON_03f_m67_003	CON	CON_03f_m67_003.xlsx_RoiSetAuto-110.zip Distance px	24	8168.08	0.394223	610.563	13.3779	610.563
CON_03f_m67_003	CON	CON_03f_m67_003.xlsx_RoiSetAuto-111.zip Distance px	24	8107.27	0.53494	610.563	13.2784	610.563
CON_03f_m67_003	CON	CON_03f_m67_003.xlsx_RoiSetAuto-112.zip Distance px	24	7126.06	0.19294	610.563	11.6713	610.563
CON_03f_m67_003	CON	CON_03f_m67_003.xlsx_RoiSetAuto-12.zip Distance px	28	5890.77	0.3192	610.563	9.64809	610.563
CON_03f_m67_003	CON	CON_03f_m67_003.xlsx_RoiSetAuto-13.zip Distance px	20	10358	1.10534	610.563	16.9647	610.563
CON_03f_m67_003	CON	CON_03f_m67_003.xlsx_RoiSetAuto-14.zip Distance px	324	14658.6	1.30137	610.563	24.0084	610.563
CON_03f_m67_003	CON	CON_03f_m67_003.xlsx_RoiSetAuto-15.zip Distance px	116	10171.5	0.881969	610.563	16.6592	610.563
CON_03f_m67_003	CON	CON_03f_m67_003.xlsx_RoiSetAuto-16.zip Distance px	24	6300.29	0.421635	610.563	10.3188	610.563
CON_03f_m67_003	CON	CON_03f_m67_003.xlsx_RoiSetAuto-17.zip Distance px	24	5102.15	0.614809	610.563	8.35647	610.563
CON_03f_m67_003	CON	CON_03f_m67_003.xlsx_RoiSetAuto-18.zip Distance px	76	7726.7	0.876266	610.563	12.655	610.563
CON_03f_m67_003	CON	CON_03f_m67_003.xlsx_RoiSetAuto-19.zip Distance px	24	6796.38	0.568091	610.563	11.1313	610.563
CON_03f_m67_003	CON	CON_03f_m67_003.xlsx_RoiSetAuto-2.zip Distance px	20	13742	0.102643	610.563	22.5071	610.563
CON_03f_m67_003	CON	CON_03f_m67_003.xlsx_RoiSetAuto-20.zip Distance px	16	6417.07	0.539998	610.563	10.5101	610.563
CON_03f_m67_003	CON	CON_03f_m67_003.xlsx_RoiSetAuto-21.zip Distance px	28	13980.7	0.360046	610.563	22.898	610.563
CON_03f_m67_003	CON	CON_03f_m67_003.xlsx_RoiSetAuto-22.zip Distance px	44	8221.29	0.768349	610.563	13.4651	610.563
CON_03f_m67_003	CON	CON_03f_m67_003.xlsx_RoiSetAuto-23.zip Distance px	56	7213.5	0.780546	610.563	11.8145	610.563
CON_03f_m67_003	CON	CON_03f_m67_003.xlsx_RoiSetAuto-24.zip Distance px	28	6914.35	0.524609	610.563	11.3245	610.563
CON_03f_m67_003	CON	CON_03f_m67_003.xlsx_RoiSetAuto-25.zip Distance px	44	6603.57	0.661285	610.563	10.8155	610.563
CON_03f_m67_003	CON	CON_03f_m67_003.xlsx_RoiSetAuto-26.zip Distance px	40	7683.9	0.730198	610.563	12.5849	610.563
CON_03f_m67_003	CON	CON_03f_m67_003.xlsx_RoiSetAuto-27.zip Distance px	40	6143.98	0.507766	610.563	10.0628	610.563
CON_03f_m67_003	CON	CON_03f_m67_003.xlsx_RoiSetAuto-28.zip Distance px	32	6418.9	0.326534	610.563	10.5131	610.563
CON_03f_m67_003	CON	CON_03f_m67_003.xlsx_RoiSetAuto-29.zip Distance px	20	10363	0.317076	610.563	16.9728	610.563
CON_03f_m67_003	CON	CON_03f_m67_003.xlsx_RoiSetAuto-3.zip Distance px	16	6756.05	0.53204	610.563	11.0653	610.563
CON_03f_m67_003	CON	CON_03f_m67_003.xlsx_RoiSetAuto-30.zip Distance px	48	7795.78	0.530169	610.563	12.7682	610.563
CON_03f_m67_003	CON	CON_03f_m67_003.xlsx_RoiSetAuto-31.zip Distance px	16	16116.9	1.06311	610.563	26.3967	610.563
CON_03f_m67_003	CON	CON_03f_m67_003.xlsx_RoiSetAuto-32.zip Distance px	16	5422.66	0.316691	610.563	8.8814	610.563
CON_03f_m67_003	CON	CON_03f_m67_003.xlsx_RoiSetAuto-33.zip Distance px	48	9801.92	0.599249	610.563	16.0539	610.563
CON_03f_m67_003	CON	CON_03f_m67_003.xlsx_RoiSetAuto-34.zip Distance px	60	17596.3	0.737323	610.563	28.8198	610.563
CON_03f_m67_003	CON	CON_03f_m67_003.xlsx_RoiSetAuto-35.zip Distance px	16	6978.49	0.426761	610.563	11.4296	610.563
CON_03f_m67_003	CON	CON_03f_m67_003.xlsx_RoiSetAuto-36.zip Distance px	32	10111.4	0.785855	610.563	16.5607	610.563
CON_03f_m67_003	CON	CON_03f_m67_003.xlsx_RoiSetAuto-37.zip Distance px	24	5080.84	0.378561	610.563	8.32156	610.563
CON_03f_m67_003	CON	CON_03f_m67_003.xlsx_RoiSetAuto-38.zip Distance px	24	6845.62	0.206117	610.563	11.212	610.563
CON_03f_m67_003	CON	CON_03f_m67_003.xlsx_RoiSetAuto-39.zip Distance px	64	8913.99	0.735412	610.563	14.5996	610.563
CON_03f_m67_003	CON	CON_03f_m67_003.xlsx_RoiSetAuto-4.zip Distance px	60	6987.83	0.789209	610.563	11.4449	610.563
CON_03f_m67_003	CON	CON_03f_m67_003.xlsx_RoiSetAuto-40.zip Distance px	140	9827.93	1.03801	610.563	16.0965	610.563
CON_03f_m67_003	CON	CON_03f_m67_003.xlsx_RoiSetAuto-41.zip Distance px	32	6851.44	0.509726	610.563	11.2215	610.563
CON_03f_m67_003	CON	CON_03f_m67_003.xlsx_RoiSetAuto-42.zip Distance px	68	8447.69	0.731652	610.563	13.8359	610.563
CON_03f_m67_003	CON	CON_03f_m67_003.xlsx_RoiSetAuto-43.zip Distance px	24	5017.88	0.356074	610.563	8.21844	610.563
CON_03f_m67_003	CON	CON_03f_m67_003.xlsx_RoiSetAuto-44.zip Distance px	20	6069.01	0.431567	610.563	9.94002	610.563
CON_03f_m67_003	CON	CON_03f_m67_003.xlsx_RoiSetAuto-45.zip Distance px	16	6775.28	0.374806	610.563	11.0968	610.563
CON_03f_m67_003	CON	CON_03f_m67_003.xlsx_RoiSetAuto-46.zip Distance px	16	6741.83	0.449671	610.563	11.042	610.563
CON_03f_m67_003	CON	CON_03f_m67_003.xlsx_RoiSetAuto-47.zip Distance px	24	8092.68	1.15814	610.563	13.2544	610.563
CON_03f_m67_003	CON	CON_03f_m67_003.xlsx_RoiSetAuto-48.zip Distance px	60	9472.96	0.69294	610.563	15.5151	610.563
CON_03f_m67_003	CON	CON_03f_m67_003.xlsx_RoiSetAuto-49.zip Distance px	56	6965.87	0.681075	610.563	11.4089	610.563
CON_03f_m67_003	CON	CON_03f_m67_003.xlsx_RoiSetAuto-5.zip Distance px	16	9695.08	0.437429	610.563	15.8789	610.563
CON_03f_m67_003	CON	CON_03f_m67_003.xlsx_RoiSetAuto-50.zip Distance px	28	6629.58	0.73782	610.563	10.8581	610.563
CON_03f_m67_003	CON	CON_03f_m67_003.xlsx_RoiSetAuto-51.zip Distance px	72	9360.6	0.802955	610.563	15.3311	610.563
CON_03f_m67_003	CON	CON_03f_m67_003.xlsx_RoiSetAuto-52.zip Distance px	36	8646.96	0.766484	610.563	14.1623	610.563
CON_03f_m67_003	CON	CON_03f_m67_003.xlsx_RoiSetAuto-53.zip Distance px	92	7285.25	1.11223	610.563	11.932	610.563
CON_03f_m67_003	CON	CON_03f_m67_003.xlsx_RoiSetAuto-54.zip Distance px	28	7074.05	0.420056	610.563	11.5861	610.563
CON_03f_m67_003	CON	CON_03f_m67_003.xlsx_RoiSetAuto-55.zip Distance px	20	6790.52	0.246756	610.563	11.1217	610.563
CON_03f_m67_003	CON	CON_03f_m67_003.xlsx_RoiSetAuto-56.zip Distance px	24	7650.48	0.35819	610.563	12.5302	610.563
CON_03f_m67_003	CON	CON_03f_m67_003.xlsx_RoiSetAuto-57.zip Distance px	32	7296.86	0.392749	610.563	11.951	610.563
CON_03f_m67_003	CON	CON_03f_m67_003.xlsx_RoiSetAuto-58.zip Distance px	24	6834.39	0.332191	610.563	11.1936	610.563
CON_03f_m67_003	CON	CON_03f_m67_003.xlsx_RoiSetAuto-59.zip Distance px	20	9922.75	0.630281	610.563	16.2518	610.563
CON_03f_m67_003	CON	CON_03f_m67_003.xlsx_RoiSetAuto-6.zip Distance px	16	9877.08	0.212262	610.563	16.177	610.563
CON_03f_m67_003	CON	CON_03f_m67_003.xlsx_RoiSetAuto-60.zip Distance px	48	7219.29	0.647489	610.563	11.824	610.563
CON_03f_m67_003	CON	CON_03f_m67_003.xlsx_RoiSetAuto-61.zip Distance px	76	9241.78	0.850121	610.563	15.1365	610.563
CON_03f_m67_003	CON	CON_03f_m67_003.xlsx_RoiSetAuto-62.zip Distance px	16	5816.99	0.257822	610.563	9.52726	610.563
CON_03f_m67_003	CON	CON_03f_m67_003.xlsx_RoiSetAuto-63.zip Distance px	16	6746.59	0.742645	610.563	11.0498	610.563
CON_03f_m67_003	CON	CON_03f_m67_003.xlsx_RoiSetAuto-64.zip Distance px	40	6885.69	0.394086	610.563	11.2776	610.563
CON_03f_m67_003	CON	CON_03f_m67_003.xlsx_RoiSetAuto-65.zip Distance px	20	8110.57	0.559647	610.563	13.2837	610.563
CON_03f_m67_003	CON	CON_03f_m67_003.xlsx_RoiSetAuto-66.zip Distance px	28	7447.7	0.503105	610.563	12.1981	610.563
CON_03f_m67_003	CON	CON_03f_m67_003.xlsx_RoiSetAuto-67.zip Distance px	36	9541.1	0.757611	610.563	15.6267	610.563
CON_03f_m67_003	CON	CON_03f_m67_003.xlsx_RoiSetAuto-68.zip Distance px	24	8503.43	0.299163	610.563	13.9272	610.563
CON_03f_m67_003	CON	CON_03f_m67_003.xlsx_RoiSetAuto-69.zip Distance px	48	8674.95	0.368718	610.563	14.2081	610.563
CON_03f_m67_003	CON	CON_03f_m67_003.xlsx_RoiSetAuto-7.zip Distance px	16	7124.73	0.952817	610.563	11.6691	610.563
CON_03f_m67_003	CON	CON_03f_m67_003.xlsx_RoiSetAuto-70.zip Distance px	20	9447.74	0.637624	610.563	15.4738	610.563
CON_03f_m67_003	CON	CON_03f_m67_003.xlsx_RoiSetAuto-71.zip Distance px	16	7023.95	0.530422	610.563	11.504	610.563
CON_03f_m67_003	CON	CON_03f_m67_003.xlsx_RoiSetAuto-72.zip Distance px	16	6433.16	0.443475	610.563	10.5364	610.563
CON_03f_m67_003	CON	CON_03f_m67_003.xlsx_RoiSetAuto-73.zip Distance px	16	6511.45	0.151835	610.563	10.6647	610.563
CON_03f_m67_003	CON	CON_03f_m67_003.xlsx_RoiSetAuto-74.zip Distance px	84	10738.2	0.933229	610.563	17.5874	610.563
CON_03f_m67_003	CON	CON_03f_m67_003.xlsx_RoiSetAuto-75.zip Distance px	20	7534.64	0.634014	610.563	12.3405	610.563
CON_03f_m67_003	CON	CON_03f_m67_003.xlsx_RoiSetAuto-76.zip Distance px	28	7750.93	0.817449	610.563	12.6947	610.563
CON_03f_m67_003	CON	CON_03f_m67_003.xlsx_RoiSetAuto-77.zip Distance px	24	10236.1	0.341903	610.563	16.7649	610.563
CON_03f_m67_003	CON	CON_03f_m67_003.xlsx_RoiSetAuto-78.zip Distance px	24	7997.65	0.819993	610.563	13.0988	610.563
CON_03f_m67_003	CON	CON_03f_m67_003.xlsx_RoiSetAuto-79.zip Distance px	16	6046.81	0.301985	610.563	9.90366	610.563
CON_03f_m67_003	CON	CON_03f_m67_003.xlsx_RoiSetAuto-8.zip Distance px	16	17248.3	0.539047	610.563	28.2498	610.563
CON_03f_m67_003	CON	CON_03f_m67_003.xlsx_RoiSetAuto-80.zip Distance px	16	7962.07	0.205435	610.563	13.0405	610.563
CON_03f_m67_003	CON	CON_03f_m67_003.xlsx_RoiSetAuto-81.zip Distance px	40	8228.23	0.918083	610.563	13.4765	610.563
CON_03f_m67_003	CON	CON_03f_m67_003.xlsx_RoiSetAuto-82.zip Distance px	28	6944.14	0.400968	610.563	11.3733	610.563
CON_03f_m67_003	CON	CON_03f_m67_003.xlsx_RoiSetAuto-83.zip Distance px	88	8382.79	0.581752	610.563	13.7296	610.563
CON_03f_m67_003	CON	CON_03f_m67_003.xlsx_RoiSetAuto-84.zip Distance px	48	8085.24	0.96952	610.563	13.2423	610.563
CON_03f_m67_003	CON	CON_03f_m67_003.xlsx_RoiSetAuto-85.zip Distance px	36	12333.1	0.714899	610.563	20.1996	610.563
CON_03f_m67_003	CON	CON_03f_m67_003.xlsx_RoiSetAuto-86.zip Distance px	52	7775.81	0.447286	610.563	12.7355	610.563
CON_03f_m67_003	CON	CON_03f_m67_003.xlsx_RoiSetAuto-87.zip Distance px	24	7729.05	0.466085	610.563	12.6589	610.563
CON_03f_m67_003	CON	CON_03f_m67_003.xlsx_RoiSetAuto-88.zip Distance px	28	7079.56	0.451068	610.563	11.5951	610.563
CON_03f_m67_003	CON	CON_03f_m67_003.xlsx_RoiSetAuto-89.zip Distance px	16	6397.35	0.349161	610.563	10.4778	610.563
CON_03f_m67_003	CON	CON_03f_m67_003.xlsx_RoiSetAuto-9.zip Distance px	28	14342.6	1.20425	610.563	23.4908	610.563
CON_03f_m67_003	CON	CON_03f_m67_003.xlsx_RoiSetAuto-90.zip Distance px	16	7398.79	0.37789	610.563	12.118	610.563
CON_03f_m67_003	CON	CON_03f_m67_003.xlsx_RoiSetAuto-91.zip Distance px	32	7192.68	0.341092	610.563	11.7804	610.563
CON_03f_m67_003	CON	CON_03f_m67_003.xlsx_RoiSetAuto-92.zip Distance px	24	6633.94	0.345084	610.563	10.8653	610.563
CON_03f_m67_003	CON	CON_03f_m67_003.xlsx_RoiSetAuto-93.zip Distance px	24	7062.5	0.221187	610.563	11.5672	610.563
CON_03f_m67_003	CON	CON_03f_m67_003.xlsx_RoiSetAuto-94.zip Distance px	52	9471.11	0.555602	610.563	15.5121	610.563
CON_03f_m67_003	CON	CON_03f_m67_003.xlsx_RoiSetAuto-95.zip Distance px	20	6525.07	0.434776	610.563	10.687	610.563
CON_03f_m67_003	CON	CON_03f_m67_003.xlsx_RoiSetAuto-96.zip Distance px	20	6108.62	0.559337	610.563	10.0049	610.563
CON_03f_m67_003	CON	CON_03f_m67_003.xlsx_RoiSetAuto-98.zip Distance px	32	7686.18	0.493774	610.563	12.5887	610.563
CON_03f_m67_003	CON	CON_03f_m67_003.xlsx_RoiSetAuto-99.zip Distance px	24	8135.21	0.659044	610.563	13.3241	610.563
CON_05f_m67_001	CON	CON_05f_m67_001.xlsx_RoiSetAuto-1.zip Distance px	72	9788.47	0.59709	763.024	12.8285	763.024
CON_05f_m67_001	CON	CON_05f_m67_001.xlsx_RoiSetAuto-10.zip Distance px	56	11611.8	0.887902	763.024	15.2181	763.024
CON_05f_m67_001	CON	CON_05f_m67_001.xlsx_RoiSetAuto-11.zip Distance px	56	10394.2	0.829753	763.024	13.6223	763.024
CON_05f_m67_001	CON	CON_05f_m67_001.xlsx_RoiSetAuto-12.zip Distance px	128	14185.8	1.34942	763.024	18.5915	763.024
CON_05f_m67_001	CON	CON_05f_m67_001.xlsx_RoiSetAuto-14.zip Distance px	92	13997	1.00197	763.024	18.3441	763.024
CON_05f_m67_001	CON	CON_05f_m67_001.xlsx_RoiSetAuto-16.zip Distance px	32	7210.5	0.414488	763.024	9.4499	763.024
CON_05f_m67_001	CON	CON_05f_m67_001.xlsx_RoiSetAuto-18.zip Distance px	168	11403.4	1.20363	763.024	14.945	763.024
CON_05f_m67_001	CON	CON_05f_m67_001.xlsx_RoiSetAuto-19.zip Distance px	20	7452.71	0.665027	763.024	9.76733	763.024
CON_05f_m67_001	CON	CON_05f_m67_001.xlsx_RoiSetAuto-2.zip Distance px	20	7446.37	0.460892	763.024	9.75903	763.024
CON_05f_m67_001	CON	CON_05f_m67_001.xlsx_RoiSetAuto-20.zip Distance px	44	7733.24	0.618277	763.024	10.135	763.024
CON_05f_m67_001	CON	CON_05f_m67_001.xlsx_RoiSetAuto-21.zip Distance px	16	7645.82	0.362712	763.024	10.0204	763.024
CON_05f_m67_001	CON	CON_05f_m67_001.xlsx_RoiSetAuto-22.zip Distance px	72	10494.7	1.32789	763.024	13.7541	763.024
CON_05f_m67_001	CON	CON_05f_m67_001.xlsx_RoiSetAuto-23.zip Distance px	16	7992.57	0.402274	763.024	10.4749	763.024
CON_05f_m67_001	CON	CON_05f_m67_001.xlsx_RoiSetAuto-24.zip Distance px	80	12516.6	1.09423	763.024	16.4039	763.024
CON_05f_m67_001	CON	CON_05f_m67_001.xlsx_RoiSetAuto-25.zip Distance px	124	13285.2	0.910563	763.024	17.4112	763.024
CON_05f_m67_001	CON	CON_05f_m67_001.xlsx_RoiSetAuto-26.zip Distance px	44	9707.72	0.599465	763.024	12.7227	763.024
CON_05f_m67_001	CON	CON_05f_m67_001.xlsx_RoiSetAuto-27.zip Distance px	24	9544.57	0.449337	763.024	12.5089	763.024
CON_05f_m67_001	CON	CON_05f_m67_001.xlsx_RoiSetAuto-28.zip Distance px	16	8688.77	0.514793	763.024	11.3873	763.024
CON_05f_m67_001	CON	CON_05f_m67_001.xlsx_RoiSetAuto-29.zip Distance px	16	7477.86	0.574334	763.024	9.80029	763.024
CON_05f_m67_001	CON	CON_05f_m67_001.xlsx_RoiSetAuto-30.zip Distance px	72	11194.8	0.700752	763.024	14.6717	763.024
CON_05f_m67_001	CON	CON_05f_m67_001.xlsx_RoiSetAuto-31.zip Distance px	76	10741.5	0.839501	763.024	14.0775	763.024
CON_05f_m67_001	CON	CON_05f_m67_001.xlsx_RoiSetAuto-32.zip Distance px	48	9103.36	1.02081	763.024	11.9306	763.024
CON_05f_m67_001	CON	CON_05f_m67_001.xlsx_RoiSetAuto-34.zip Distance px	64	11886.8	0.893099	763.024	15.5785	763.024
CON_05f_m67_001	CON	CON_05f_m67_001.xlsx_RoiSetAuto-36.zip Distance px	20	7948.52	0.387389	763.024	10.4171	763.024
CON_05f_m67_001	CON	CON_05f_m67_001.xlsx_RoiSetAuto-38.zip Distance px	24	8715.09	0.414399	763.024	11.4218	763.024
CON_05f_m67_001	CON	CON_05f_m67_001.xlsx_RoiSetAuto-39.zip Distance px	84	9346.1	0.614325	763.024	12.2488	763.024
CON_05f_m67_001	CON	CON_05f_m67_001.xlsx_RoiSetAuto-4.zip Distance px	100	9933.02	0.961084	763.024	13.018	763.024
CON_05f_m67_001	CON	CON_05f_m67_001.xlsx_RoiSetAuto-41.zip Distance px	24	8150.71	0.298363	763.024	10.6821	763.024
CON_05f_m67_001	CON	CON_05f_m67_001.xlsx_RoiSetAuto-42.zip Distance px	40	9507.64	0.662971	763.024	12.4605	763.024
CON_05f_m67_001	CON	CON_05f_m67_001.xlsx_RoiSetAuto-43.zip Distance px	28	10116.1	0.749606	763.024	13.2579	763.024
CON_05f_m67_001	CON	CON_05f_m67_001.xlsx_RoiSetAuto-44.zip Distance px	44	9145.2	0.738702	763.024	11.9855	763.024
CON_05f_m67_001	CON	CON_05f_m67_001.xlsx_RoiSetAuto-45.zip Distance px	32	9945.38	0.739065	763.024	13.0342	763.024
CON_05f_m67_001	CON	CON_05f_m67_001.xlsx_RoiSetAuto-46.zip Distance px	96	14221.8	0.943363	763.024	18.6387	763.024
CON_05f_m67_001	CON	CON_05f_m67_001.xlsx_RoiSetAuto-47.zip Distance px	68	11125.5	0.920386	763.024	14.5808	763.024
CON_05f_m67_001	CON	CON_05f_m67_001.xlsx_RoiSetAuto-5.zip Distance px	48	10803.1	0.566415	763.024	14.1583	763.024
CON_05f_m67_001	CON	CON_05f_m67_001.xlsx_RoiSetAuto-50.zip Distance px	72	11508.2	0.64591	763.024	15.0823	763.024
CON_05f_m67_001	CON	CON_05f_m67_001.xlsx_RoiSetAuto-51.zip Distance px	80	9525.72	0.689685	763.024	12.4842	763.024
CON_05f_m67_001	CON	CON_05f_m67_001.xlsx_RoiSetAuto-52.zip Distance px	16	8641.86	0.322707	763.024	11.3258	763.024
CON_05f_m67_001	CON	CON_05f_m67_001.xlsx_RoiSetAuto-53.zip Distance px	60	14412.7	0.96108	763.024	18.8889	763.024
CON_05f_m67_001	CON	CON_05f_m67_001.xlsx_RoiSetAuto-54.zip Distance px	20	7984.05	0.759769	763.024	10.4637	763.024
CON_05f_m67_001	CON	CON_05f_m67_001.xlsx_RoiSetAuto-55.zip Distance px	32	8645.75	0.452391	763.024	11.3309	763.024
CON_05f_m67_001	CON	CON_05f_m67_001.xlsx_RoiSetAuto-56.zip Distance px	36	10251	0.671999	763.024	13.4347	763.024
CON_05f_m67_001	CON	CON_05f_m67_001.xlsx_RoiSetAuto-57.zip Distance px	80	12114.7	0.758401	763.024	15.8773	763.024
CON_05f_m67_001	CON	CON_05f_m67_001.xlsx_RoiSetAuto-58.zip Distance px	20	7882.43	0.458599	763.024	10.3305	763.024
CON_05f_m67_001	CON	CON_05f_m67_001.xlsx_RoiSetAuto-59.zip Distance px	16	9809.08	0.078782	763.024	12.8555	763.024
CON_05f_m67_001	CON	CON_05f_m67_001.xlsx_RoiSetAuto-6.zip Distance px	84	9283.79	0.756584	763.024	12.1671	763.024
CON_05f_m67_001	CON	CON_05f_m67_001.xlsx_RoiSetAuto-60.zip Distance px	24	8485.32	0.337772	763.024	11.1206	763.024
CON_05f_m67_001	CON	CON_05f_m67_001.xlsx_RoiSetAuto-61.zip Distance px	24	8436.45	0.417985	763.024	11.0566	763.024
CON_05f_m67_001	CON	CON_05f_m67_001.xlsx_RoiSetAuto-62.zip Distance px	60	9422.99	0.617988	763.024	12.3495	763.024
CON_05f_m67_001	CON	CON_05f_m67_001.xlsx_RoiSetAuto-63.zip Distance px	28	11345	0.360395	763.024	14.8684	763.024
CON_05f_m67_001	CON	CON_05f_m67_001.xlsx_RoiSetAuto-64.zip Distance px	16	13129.9	0.782812	763.024	17.2077	763.024
CON_05f_m67_001	CON	CON_05f_m67_001.xlsx_RoiSetAuto-65.zip Distance px	24	10923.6	0.285205	763.024	14.3162	763.024
CON_05f_m67_001	CON	CON_05f_m67_001.xlsx_RoiSetAuto-67.zip Distance px	56	10550.3	0.487548	763.024	13.827	763.024
CON_05f_m67_001	CON	CON_05f_m67_001.xlsx_RoiSetAuto-68.zip Distance px	20	8092	0.336918	763.024	10.6052	763.024
CON_05f_m67_001	CON	CON_05f_m67_001.xlsx_RoiSetAuto-69.zip Distance px	16	8750.18	0.232106	763.024	11.4678	763.024
CON_05f_m67_001	CON	CON_05f_m67_001.xlsx_RoiSetAuto-7.zip Distance px	36	8360.59	0.944058	763.024	10.9572	763.024
CON_05f_m67_001	CON	CON_05f_m67_001.xlsx_RoiSetAuto-70.zip Distance px	92	17204.5	1.18445	763.024	22.5477	763.024
CON_05f_m67_001	CON	CON_05f_m67_001.xlsx_RoiSetAuto-71.zip Distance px	20	9987.78	0.344232	763.024	13.0897	763.024
CON_05f_m67_001	CON	CON_05f_m67_001.xlsx_RoiSetAuto-72.zip Distance px	28	12337.2	0.548131	763.024	16.1688	763.024
CON_05f_m67_001	CON	CON_05f_m67_001.xlsx_RoiSetAuto-73.zip Distance px	16	8347.94	0.0593859	763.024	10.9406	763.024
CON_05f_m67_001	CON	CON_05f_m67_001.xlsx_RoiSetAuto-74.zip Distance px	40	11853.4	0.260932	763.024	15.5348	763.024
CON_05f_m67_001	CON	CON_05f_m67_001.xlsx_RoiSetAuto-75.zip Distance px	20	8181.33	0.183584	763.024	10.7222	763.024
CON_05f_m67_001	CON	CON_05f_m67_001.xlsx_RoiSetAuto-77.zip Distance px	36	9558.63	0.25054	763.024	12.5273	763.024
CON_05f_m67_001	CON	CON_05f_m67_001.xlsx_RoiSetAuto-79.zip Distance px	24	9809.1	0.43737	763.024	12.8555	763.024
CON_05f_m67_001	CON	CON_05f_m67_001.xlsx_RoiSetAuto-8.zip Distance px	44	8658.82	0.590052	763.024	11.348	763.024
CON_05f_m67_001	CON	CON_05f_m67_001.xlsx_RoiSetAuto-80.zip Distance px	44	12174	0.769896	763.024	15.9549	763.024
CON_05f_m67_001	CON	CON_05f_m67_001.xlsx_RoiSetAuto-81.zip Distance px	32	10332.1	0.324853	763.024	13.541	763.024
CON_05f_m67_001	CON	CON_05f_m67_001.xlsx_RoiSetAuto-82.zip Distance px	36	12291.4	0.458321	763.024	16.1089	763.024
CON_05f_m67_001	CON	CON_05f_m67_001.xlsx_RoiSetAuto-83.zip Distance px	52	11251.4	0.544836	763.024	14.7457	763.024
CON_05f_m67_001	CON	CON_05f_m67_001.xlsx_RoiSetAuto-84.zip Distance px	24	12936.1	0.613363	763.024	16.9537	763.024
CON_05f_m67_001	CON	CON_05f_m67_001.xlsx_RoiSetAuto-85.zip Distance px	48	13849.4	0.768019	763.024	18.1506	763.024
CON_05f_m67_001	CON	CON_05f_m67_001.xlsx_RoiSetAuto-86.zip Distance px	16	8267.09	0.239091	763.024	10.8346	763.024
CON_05f_m67_001	CON	CON_05f_m67_001.xlsx_RoiSetAuto-87.zip Distance px	20	11659.5	0.290741	763.024	15.2807	763.024
CON_05f_m67_001	CON	CON_05f_m67_001.xlsx_RoiSetAuto-88.zip Distance px	48	17506.6	0.7598	763.024	22.9437	763.024
CON_05f_m67_001	CON	CON_05f_m67_001.xlsx_RoiSetAuto-89.zip Distance px	24	9484.8	0.219913	763.024	12.4305	763.024
CON_05f_m67_001	CON	CON_05f_m67_001.xlsx_RoiSetAuto-9.zip Distance px	92	11835.3	1.07939	763.024	15.511	763.024
CON_05f_m67_001	CON	CON_05f_m67_001.xlsx_RoiSetAuto-91.zip Distance px	32	16546.6	0.627682	763.024	21.6855	763.024
CON_05f_m67_001	CON	CON_05f_m67_001.xlsx_RoiSetAuto-94.zip Distance px	16	15852.4	0.348371	763.024	20.7758	763.024
CON_05f_m67_001	CON	CON_05f_m67_001.xlsx_RoiSetAuto-95.zip Distance px	36	11136.9	0.399589	763.024	14.5957	763.024
CON_05f_m67_001	CON	CON_05f_m67_001.xlsx_RoiSetAuto-96.zip Distance px	20	9461.49	0.487038	763.024	12.4	763.024
CON_05f_m67_001	CON	CON_05f_m67_001.xlsx_RoiSetAuto-97.zip Distance px	24	9489.55	0.366174	763.024	12.4368	763.024
CON_05f_m67_001	CON	CON_05f_m67_001.xlsx_RoiSetAuto-98.zip Distance px	20	12246.7	0.612947	763.024	16.0502	763.024
CON_05f_m67_001	CON	CON_05f_m67_001.xlsx_RoiSetAuto-99.zip Distance px	16	8503.65	0.198898	763.024	11.1447	763.024
CON_05f_m67_002	CON	CON_05f_m67_002.xlsx_RoiSetAuto-1.zip Distance px	152	13101.4	1.14612	851.902	15.379	851.902
CON_05f_m67_002	CON	CON_05f_m67_002.xlsx_RoiSetAuto-11.zip Distance px	64	14692.2	0.977743	851.902	17.2463	851.902
CON_05f_m67_002	CON	CON_05f_m67_002.xlsx_RoiSetAuto-13.zip Distance px	160	18321.5	1.22664	851.902	21.5065	851.902
CON_05f_m67_002	CON	CON_05f_m67_002.xlsx_RoiSetAuto-14.zip Distance px	44	8945.24	0.51481	851.902	10.5003	851.902
CON_05f_m67_002	CON	CON_05f_m67_002.xlsx_RoiSetAuto-17.zip Distance px	36	12487.5	0.497955	851.902	14.6584	851.902
CON_05f_m67_002	CON	CON_05f_m67_002.xlsx_RoiSetAuto-18.zip Distance px	48	13822.9	0.700842	851.902	16.2259	851.902
CON_05f_m67_002	CON	CON_05f_m67_002.xlsx_RoiSetAuto-2.zip Distance px	184	19555.9	1.18378	851.902	22.9556	851.902
CON_05f_m67_002	CON	CON_05f_m67_002.xlsx_RoiSetAuto-20.zip Distance px	260	16338.9	1.24077	851.902	19.1793	851.902
CON_05f_m67_002	CON	CON_05f_m67_002.xlsx_RoiSetAuto-23.zip Distance px	220	18737.4	1.172	851.902	21.9947	851.902
CON_05f_m67_002	CON	CON_05f_m67_002.xlsx_RoiSetAuto-25.zip Distance px	36	10481.8	0.735375	851.902	12.304	851.902
CON_05f_m67_002	CON	CON_05f_m67_002.xlsx_RoiSetAuto-26.zip Distance px	24	10886.6	0.236283	851.902	12.7791	851.902
CON_05f_m67_002	CON	CON_05f_m67_002.xlsx_RoiSetAuto-27.zip Distance px	16	7246.14	0.385763	851.902	8.50584	851.902
CON_05f_m67_002	CON	CON_05f_m67_002.xlsx_RoiSetAuto-28.zip Distance px	44	10436.9	0.481346	851.902	12.2513	851.902
CON_05f_m67_002	CON	CON_05f_m67_002.xlsx_RoiSetAuto-29.zip Distance px	40	18092.9	0.951711	851.902	21.2382	851.902
CON_05f_m67_002	CON	CON_05f_m67_002.xlsx_RoiSetAuto-3.zip Distance px	48	14568.2	0.564646	851.902	17.1008	851.902
CON_05f_m67_002	CON	CON_05f_m67_002.xlsx_RoiSetAuto-30.zip Distance px	104	25527	0.928309	851.902	29.9648	851.902
CON_05f_m67_002	CON	CON_05f_m67_002.xlsx_RoiSetAuto-31.zip Distance px	16	12086.7	0.433268	851.902	14.1879	851.902
CON_05f_m67_002	CON	CON_05f_m67_002.xlsx_RoiSetAuto-32.zip Distance px	108	18432.9	1.15488	851.902	21.6373	851.902
CON_05f_m67_002	CON	CON_05f_m67_002.xlsx_RoiSetAuto-33.zip Distance px	92	15179	0.65242	851.902	17.8177	851.902
CON_05f_m67_002	CON	CON_05f_m67_002.xlsx_RoiSetAuto-34.zip Distance px	24	13404.3	0.333043	851.902	15.7346	851.902
CON_05f_m67_002	CON	CON_05f_m67_002.xlsx_RoiSetAuto-35.zip Distance px	28	8306.87	0.511001	851.902	9.75097	851.902
CON_05f_m67_002	CON	CON_05f_m67_002.xlsx_RoiSetAuto-36.zip Distance px	24	10757.9	0.307495	851.902	12.6281	851.902
CON_05f_m67_002	CON	CON_05f_m67_002.xlsx_RoiSetAuto-37.zip Distance px	44	13709.3	0.871178	851.902	16.0926	851.902
CON_05f_m67_002	CON	CON_05f_m67_002.xlsx_RoiSetAuto-39.zip Distance px	112	15484	0.971681	851.902	18.1758	851.902
CON_05f_m67_002	CON	CON_05f_m67_002.xlsx_RoiSetAuto-4.zip Distance px	48	16156.8	0.652053	851.902	18.9655	851.902
CON_05f_m67_002	CON	CON_05f_m67_002.xlsx_RoiSetAuto-40.zip Distance px	104	13974.2	0.63167	851.902	16.4035	851.902
CON_05f_m67_002	CON	CON_05f_m67_002.xlsx_RoiSetAuto-41.zip Distance px	52	12061.3	1.01746	851.902	14.1581	851.902
CON_05f_m67_002	CON	CON_05f_m67_002.xlsx_RoiSetAuto-43.zip Distance px	36	11173.4	0.750723	851.902	13.1159	851.902
CON_05f_m67_002	CON	CON_05f_m67_002.xlsx_RoiSetAuto-44.zip Distance px	52	14508.8	0.753222	851.902	17.031	851.902
CON_05f_m67_002	CON	CON_05f_m67_002.xlsx_RoiSetAuto-45.zip Distance px	20	15384.1	0.588247	851.902	18.0585	851.902
CON_05f_m67_002	CON	CON_05f_m67_002.xlsx_RoiSetAuto-46.zip Distance px	16	10522.2	0.40131	851.902	12.3514	851.902
CON_05f_m67_002	CON	CON_05f_m67_002.xlsx_RoiSetAuto-47.zip Distance px	76	13894.6	0.557716	851.902	16.3101	851.902
CON_05f_m67_002	CON	CON_05f_m67_002.xlsx_RoiSetAuto-48.zip Distance px	16	9779.02	0.310056	851.902	11.479	851.902
CON_05f_m67_002	CON	CON_05f_m67_002.xlsx_RoiSetAuto-49.zip Distance px	72	15688.7	0.786284	851.902	18.4161	851.902
CON_05f_m67_002	CON	CON_05f_m67_002.xlsx_RoiSetAuto-5.zip Distance px	24	7582.76	0.432395	851.902	8.90098	851.902
CON_05f_m67_002	CON	CON_05f_m67_002.xlsx_RoiSetAuto-50.zip Distance px	56	12203.9	0.481978	851.902	14.3255	851.902
CON_05f_m67_002	CON	CON_05f_m67_002.xlsx_RoiSetAuto-52.zip Distance px	32	12376	0.444064	851.902	14.5275	851.902
CON_05f_m67_002	CON	CON_05f_m67_002.xlsx_RoiSetAuto-53.zip Distance px	16	9483.04	0.454856	851.902	11.1316	851.902
CON_05f_m67_002	CON	CON_05f_m67_002.xlsx_RoiSetAuto-54.zip Distance px	16	8809.53	1.40868	851.902	10.341	851.902
CON_05f_m67_002	CON	CON_05f_m67_002.xlsx_RoiSetAuto-55.zip Distance px	56	10810.6	0.573327	851.902	12.69	851.902
CON_05f_m67_002	CON	CON_05f_m67_002.xlsx_RoiSetAuto-56.zip Distance px	28	12977.5	0.423967	851.902	15.2336	851.902
CON_05f_m67_002	CON	CON_05f_m67_002.xlsx_RoiSetAuto-57.zip Distance px	36	12416	0.56252	851.902	14.5744	851.902
CON_05f_m67_002	CON	CON_05f_m67_002.xlsx_RoiSetAuto-58.zip Distance px	24	11525.7	0.771221	851.902	13.5294	851.902
CON_05f_m67_002	CON	CON_05f_m67_002.xlsx_RoiSetAuto-60.zip Distance px	20	11843.2	0.647433	851.902	13.9021	851.902
CON_05f_m67_002	CON	CON_05f_m67_002.xlsx_RoiSetAuto-8.zip Distance px	44	12206.8	0.645817	851.902	14.3288	851.902
CON_05f_m67_002	CON	CON_05f_m67_002.xlsx_RoiSetAuto-9.zip Distance px	24	9923.48	0.560218	851.902	11.6486	851.902
CON_06f_m67_001	CON	CON_06f_m67_001.xlsx_RoiSetAuto-100.zip Distance px	16	5407.8	0.396593	433.857	12.4645	433.857
CON_06f_m67_001	CON	CON_06f_m67_001.xlsx_RoiSetAuto-101.zip Distance px	20	5755.01	0.328086	433.857	13.2648	433.857
CON_06f_m67_001	CON	CON_06f_m67_001.xlsx_RoiSetAuto-104.zip Distance px	20	3440.35	0.723339	433.857	7.9297	433.857
CON_06f_m67_001	CON	CON_06f_m67_001.xlsx_RoiSetAuto-105.zip Distance px	92	9645.92	0.986557	433.857	22.233	433.857
CON_06f_m67_001	CON	CON_06f_m67_001.xlsx_RoiSetAuto-106.zip Distance px	16	3899.26	0.456011	433.857	8.98743	433.857
CON_06f_m67_001	CON	CON_06f_m67_001.xlsx_RoiSetAuto-107.zip Distance px	96	7062.83	1.13232	433.857	16.2792	433.857
CON_06f_m67_001	CON	CON_06f_m67_001.xlsx_RoiSetAuto-108.zip Distance px	24	5207.27	0.756891	433.857	12.0023	433.857
CON_06f_m67_001	CON	CON_06f_m67_001.xlsx_RoiSetAuto-109.zip Distance px	60	6179.2	0.988019	433.857	14.2425	433.857
CON_06f_m67_001	CON	CON_06f_m67_001.xlsx_RoiSetAuto-11.zip Distance px	24	6606.67	0.676957	433.857	15.2278	433.857
CON_06f_m67_001	CON	CON_06f_m67_001.xlsx_RoiSetAuto-110.zip Distance px	24	8496.27	2.46353	433.857	19.5831	433.857
CON_06f_m67_001	CON	CON_06f_m67_001.xlsx_RoiSetAuto-111.zip Distance px	204	19209.5	0.974936	433.857	44.2761	433.857
CON_06f_m67_001	CON	CON_06f_m67_001.xlsx_RoiSetAuto-112.zip Distance px	24	5915.01	0.452006	433.857	13.6336	433.857
CON_06f_m67_001	CON	CON_06f_m67_001.xlsx_RoiSetAuto-113.zip Distance px	68	8066.11	0.884857	433.857	18.5916	433.857
CON_06f_m67_001	CON	CON_06f_m67_001.xlsx_RoiSetAuto-114.zip Distance px	44	5273.31	0.630273	433.857	12.1545	433.857
CON_06f_m67_001	CON	CON_06f_m67_001.xlsx_RoiSetAuto-116.zip Distance px	252	10734.9	1.95095	433.857	24.7429	433.857
CON_06f_m67_001	CON	CON_06f_m67_001.xlsx_RoiSetAuto-118.zip Distance px	28	5555.59	0.623424	433.857	12.8051	433.857
CON_06f_m67_001	CON	CON_06f_m67_001.xlsx_RoiSetAuto-12.zip Distance px	196	10767.7	1.42302	433.857	24.8187	433.857
CON_06f_m67_001	CON	CON_06f_m67_001.xlsx_RoiSetAuto-120.zip Distance px	24	4738.61	0.440895	433.857	10.9221	433.857
CON_06f_m67_001	CON	CON_06f_m67_001.xlsx_RoiSetAuto-121.zip Distance px	40	6027.18	0.613064	433.857	13.8921	433.857
CON_06f_m67_001	CON	CON_06f_m67_001.xlsx_RoiSetAuto-122.zip Distance px	56	6835.04	0.778873	433.857	15.7541	433.857
CON_06f_m67_001	CON	CON_06f_m67_001.xlsx_RoiSetAuto-123.zip Distance px	144	8225	1.45434	433.857	18.9579	433.857
CON_06f_m67_001	CON	CON_06f_m67_001.xlsx_RoiSetAuto-125.zip Distance px	24	6992.58	0.600301	433.857	16.1173	433.857
CON_06f_m67_001	CON	CON_06f_m67_001.xlsx_RoiSetAuto-127.zip Distance px	76	7204.2	1.06772	433.857	16.605	433.857
CON_06f_m67_001	CON	CON_06f_m67_001.xlsx_RoiSetAuto-128.zip Distance px	60	5827.73	1.77864	433.857	13.4324	433.857
CON_06f_m67_001	CON	CON_06f_m67_001.xlsx_RoiSetAuto-130.zip Distance px	24	5285.85	0.556025	433.857	12.1834	433.857
CON_06f_m67_001	CON	CON_06f_m67_001.xlsx_RoiSetAuto-132.zip Distance px	88	6699.06	0.604776	433.857	15.4407	433.857
CON_06f_m67_001	CON	CON_06f_m67_001.xlsx_RoiSetAuto-133.zip Distance px	112	6018.23	1.02826	433.857	13.8715	433.857
CON_06f_m67_001	CON	CON_06f_m67_001.xlsx_RoiSetAuto-134.zip Distance px	36	5016.75	0.362166	433.857	11.5632	433.857
CON_06f_m67_001	CON	CON_06f_m67_001.xlsx_RoiSetAuto-135.zip Distance px	16	5875.87	0.578419	433.857	13.5433	433.857
CON_06f_m67_001	CON	CON_06f_m67_001.xlsx_RoiSetAuto-136.zip Distance px	40	5408.18	0.899372	433.857	12.4654	433.857
CON_06f_m67_001	CON	CON_06f_m67_001.xlsx_RoiSetAuto-137.zip Distance px	20	4455.55	0.427997	433.857	10.2696	433.857
CON_06f_m67_001	CON	CON_06f_m67_001.xlsx_RoiSetAuto-138.zip Distance px	16	5999.45	0.389648	433.857	13.8282	433.857
CON_06f_m67_001	CON	CON_06f_m67_001.xlsx_RoiSetAuto-139.zip Distance px	20	6549.13	0.843446	433.857	15.0951	433.857
CON_06f_m67_001	CON	CON_06f_m67_001.xlsx_RoiSetAuto-14.zip Distance px	356	11904.3	1.43282	433.857	27.4383	433.857
CON_06f_m67_001	CON	CON_06f_m67_001.xlsx_RoiSetAuto-140.zip Distance px	80	7067.64	0.666547	433.857	16.2903	433.857
CON_06f_m67_001	CON	CON_06f_m67_001.xlsx_RoiSetAuto-141.zip Distance px	28	4827.72	0.533052	433.857	11.1275	433.857
CON_06f_m67_001	CON	CON_06f_m67_001.xlsx_RoiSetAuto-142.zip Distance px	16	4585.22	0.399182	433.857	10.5685	433.857
CON_06f_m67_001	CON	CON_06f_m67_001.xlsx_RoiSetAuto-143.zip Distance px	16	5895.38	0.75091	433.857	13.5883	433.857
CON_06f_m67_001	CON	CON_06f_m67_001.xlsx_RoiSetAuto-144.zip Distance px	120	6703.39	0.844386	433.857	15.4507	433.857
CON_06f_m67_001	CON	CON_06f_m67_001.xlsx_RoiSetAuto-145.zip Distance px	20	7607.21	0.613626	433.857	17.5339	433.857
CON_06f_m67_001	CON	CON_06f_m67_001.xlsx_RoiSetAuto-147.zip Distance px	16	5608.23	0.23529	433.857	12.9265	433.857
CON_06f_m67_001	CON	CON_06f_m67_001.xlsx_RoiSetAuto-148.zip Distance px	16	5483.4	0.587973	433.857	12.6387	433.857
CON_06f_m67_001	CON	CON_06f_m67_001.xlsx_RoiSetAuto-149.zip Distance px	24	5737.8	0.935838	433.857	13.2251	433.857
CON_06f_m67_001	CON	CON_06f_m67_001.xlsx_RoiSetAuto-15.zip Distance px	20	5645.38	0.400691	433.857	13.0121	433.857
CON_06f_m67_001	CON	CON_06f_m67_001.xlsx_RoiSetAuto-151.zip Distance px	24	4789.98	1.05732	433.857	11.0405	433.857
CON_06f_m67_001	CON	CON_06f_m67_001.xlsx_RoiSetAuto-152.zip Distance px	48	6244.63	1.00803	433.857	14.3933	433.857
CON_06f_m67_001	CON	CON_06f_m67_001.xlsx_RoiSetAuto-154.zip Distance px	128	8369.4	1.34678	433.857	19.2907	433.857
CON_06f_m67_001	CON	CON_06f_m67_001.xlsx_RoiSetAuto-155.zip Distance px	76	7276.78	0.561669	433.857	16.7723	433.857
CON_06f_m67_001	CON	CON_06f_m67_001.xlsx_RoiSetAuto-156.zip Distance px	40	7117.14	0.765418	433.857	16.4044	433.857
CON_06f_m67_001	CON	CON_06f_m67_001.xlsx_RoiSetAuto-157.zip Distance px	20	6103	0.721368	433.857	14.0669	433.857
CON_06f_m67_001	CON	CON_06f_m67_001.xlsx_RoiSetAuto-158.zip Distance px	20	5026.02	0.478545	433.857	11.5845	433.857
CON_06f_m67_001	CON	CON_06f_m67_001.xlsx_RoiSetAuto-159.zip Distance px	20	4677.93	0.531604	433.857	10.7822	433.857
CON_06f_m67_001	CON	CON_06f_m67_001.xlsx_RoiSetAuto-160.zip Distance px	20	5729.87	0.50119	433.857	13.2068	433.857
CON_06f_m67_001	CON	CON_06f_m67_001.xlsx_RoiSetAuto-162.zip Distance px	60	7747.43	0.941108	433.857	17.8571	433.857
CON_06f_m67_001	CON	CON_06f_m67_001.xlsx_RoiSetAuto-163.zip Distance px	16	4692.98	0.148645	433.857	10.8169	433.857
CON_06f_m67_001	CON	CON_06f_m67_001.xlsx_RoiSetAuto-164.zip Distance px	20	5985.76	0.601099	433.857	13.7966	433.857
CON_06f_m67_001	CON	CON_06f_m67_001.xlsx_RoiSetAuto-165.zip Distance px	168	11094.1	1.26155	433.857	25.571	433.857
CON_06f_m67_001	CON	CON_06f_m67_001.xlsx_RoiSetAuto-166.zip Distance px	16	4296.15	0.462359	433.857	9.90222	433.857
CON_06f_m67_001	CON	CON_06f_m67_001.xlsx_RoiSetAuto-167.zip Distance px	28	5158.53	0.711719	433.857	11.8899	433.857
CON_06f_m67_001	CON	CON_06f_m67_001.xlsx_RoiSetAuto-168.zip Distance px	16	4200.56	0.194059	433.857	9.68191	433.857
CON_06f_m67_001	CON	CON_06f_m67_001.xlsx_RoiSetAuto-169.zip Distance px	24	5277	0.825053	433.857	12.163	433.857
CON_06f_m67_001	CON	CON_06f_m67_001.xlsx_RoiSetAuto-17.zip Distance px	64	7439.22	1.1499	433.857	17.1467	433.857
CON_06f_m67_001	CON	CON_06f_m67_001.xlsx_RoiSetAuto-170.zip Distance px	52	5442.71	0.831018	433.857	12.5449	433.857
CON_06f_m67_001	CON	CON_06f_m67_001.xlsx_RoiSetAuto-171.zip Distance px	108	11034.2	1.09842	433.857	25.4327	433.857
CON_06f_m67_001	CON	CON_06f_m67_001.xlsx_RoiSetAuto-172.zip Distance px	16	3761.85	0.137054	433.857	8.67073	433.857
CON_06f_m67_001	CON	CON_06f_m67_001.xlsx_RoiSetAuto-173.zip Distance px	144	7595.04	1.22024	433.857	17.5059	433.857
CON_06f_m67_001	CON	CON_06f_m67_001.xlsx_RoiSetAuto-174.zip Distance px	84	7333.56	1.025	433.857	16.9032	433.857
CON_06f_m67_001	CON	CON_06f_m67_001.xlsx_RoiSetAuto-175.zip Distance px	24	5264.67	0.391779	433.857	12.1346	433.857
CON_06f_m67_001	CON	CON_06f_m67_001.xlsx_RoiSetAuto-176.zip Distance px	68	6848.59	0.896093	433.857	15.7854	433.857
CON_06f_m67_001	CON	CON_06f_m67_001.xlsx_RoiSetAuto-177.zip Distance px	60	6524.34	1.0088	433.857	15.038	433.857
CON_06f_m67_001	CON	CON_06f_m67_001.xlsx_RoiSetAuto-178.zip Distance px	48	6816.84	1.24985	433.857	15.7122	433.857
CON_06f_m67_001	CON	CON_06f_m67_001.xlsx_RoiSetAuto-179.zip Distance px	28	4996.93	0.596761	433.857	11.5175	433.857
CON_06f_m67_001	CON	CON_06f_m67_001.xlsx_RoiSetAuto-18.zip Distance px	60	6383.48	1.30707	433.857	14.7133	433.857
CON_06f_m67_001	CON	CON_06f_m67_001.xlsx_RoiSetAuto-180.zip Distance px	20	5759.46	0.589183	433.857	13.275	433.857
CON_06f_m67_001	CON	CON_06f_m67_001.xlsx_RoiSetAuto-181.zip Distance px	16	5601.54	0.447568	433.857	12.911	433.857
CON_06f_m67_001	CON	CON_06f_m67_001.xlsx_RoiSetAuto-182.zip Distance px	60	8079.87	1.17841	433.857	18.6234	433.857
CON_06f_m67_001	CON	CON_06f_m67_001.xlsx_RoiSetAuto-183.zip Distance px	20	8732.37	0.258338	433.857	20.1273	433.857
CON_06f_m67_001	CON	CON_06f_m67_001.xlsx_RoiSetAuto-184.zip Distance px	60	8223.25	0.685228	433.857	18.9538	433.857
CON_06f_m67_001	CON	CON_06f_m67_001.xlsx_RoiSetAuto-185.zip Distance px	20	4846.95	0.490552	433.857	11.1718	433.857
CON_06f_m67_001	CON	CON_06f_m67_001.xlsx_RoiSetAuto-188.zip Distance px	76	9262.52	1.005	433.857	21.3492	433.857
CON_06f_m67_001	CON	CON_06f_m67_001.xlsx_RoiSetAuto-189.zip Distance px	24	6081.19	0.735296	433.857	14.0166	433.857
CON_06f_m67_001	CON	CON_06f_m67_001.xlsx_RoiSetAuto-19.zip Distance px	52	6939.81	1.08823	433.857	15.9956	433.857
CON_06f_m67_001	CON	CON_06f_m67_001.xlsx_RoiSetAuto-190.zip Distance px	20	6398.42	0.248064	433.857	14.7478	433.857
CON_06f_m67_001	CON	CON_06f_m67_001.xlsx_RoiSetAuto-191.zip Distance px	32	4772.36	0.499827	433.857	10.9999	433.857
CON_06f_m67_001	CON	CON_06f_m67_001.xlsx_RoiSetAuto-192.zip Distance px	116	12187.1	1.16935	433.857	28.0901	433.857
CON_06f_m67_001	CON	CON_06f_m67_001.xlsx_RoiSetAuto-194.zip Distance px	68	7212.61	0.776822	433.857	16.6244	433.857
CON_06f_m67_001	CON	CON_06f_m67_001.xlsx_RoiSetAuto-196.zip Distance px	60	6652.24	0.914752	433.857	15.3328	433.857
CON_06f_m67_001	CON	CON_06f_m67_001.xlsx_RoiSetAuto-197.zip Distance px	68	8382.8	0.83338	433.857	19.3216	433.857
CON_06f_m67_001	CON	CON_06f_m67_001.xlsx_RoiSetAuto-198.zip Distance px	24	6650.36	0.207736	433.857	15.3285	433.857
CON_06f_m67_001	CON	CON_06f_m67_001.xlsx_RoiSetAuto-199.zip Distance px	72	7557.93	1.02886	433.857	17.4203	433.857
CON_06f_m67_001	CON	CON_06f_m67_001.xlsx_RoiSetAuto-2.zip Distance px	156	11228.2	1.17745	433.857	25.8799	433.857
CON_06f_m67_001	CON	CON_06f_m67_001.xlsx_RoiSetAuto-20.zip Distance px	36	4814.3	0.522689	433.857	11.0965	433.857
CON_06f_m67_001	CON	CON_06f_m67_001.xlsx_RoiSetAuto-200.zip Distance px	32	6407.09	0.668228	433.857	14.7678	433.857
CON_06f_m67_001	CON	CON_06f_m67_001.xlsx_RoiSetAuto-201.zip Distance px	56	7800.77	0.88954	433.857	17.9801	433.857
CON_06f_m67_001	CON	CON_06f_m67_001.xlsx_RoiSetAuto-202.zip Distance px	76	8651.61	0.751183	433.857	19.9412	433.857
CON_06f_m67_001	CON	CON_06f_m67_001.xlsx_RoiSetAuto-203.zip Distance px	80	6386.44	0.797843	433.857	14.7202	433.857
CON_06f_m67_001	CON	CON_06f_m67_001.xlsx_RoiSetAuto-205.zip Distance px	36	6545.31	0.866236	433.857	15.0863	433.857
CON_06f_m67_001	CON	CON_06f_m67_001.xlsx_RoiSetAuto-206.zip Distance px	32	8069.28	1.00754	433.857	18.599	433.857
CON_06f_m67_001	CON	CON_06f_m67_001.xlsx_RoiSetAuto-207.zip Distance px	56	6351.08	0.69822	433.857	14.6387	433.857
CON_06f_m67_001	CON	CON_06f_m67_001.xlsx_RoiSetAuto-208.zip Distance px	20	6626.83	0.539484	433.857	15.2742	433.857
CON_06f_m67_001	CON	CON_06f_m67_001.xlsx_RoiSetAuto-209.zip Distance px	16	4590.23	0.309197	433.857	10.58	433.857
CON_06f_m67_001	CON	CON_06f_m67_001.xlsx_RoiSetAuto-21.zip Distance px	40	5592	0.468197	433.857	12.8891	433.857
CON_06f_m67_001	CON	CON_06f_m67_001.xlsx_RoiSetAuto-211.zip Distance px	44	6869.39	1.31172	433.857	15.8333	433.857
CON_06f_m67_001	CON	CON_06f_m67_001.xlsx_RoiSetAuto-212.zip Distance px	20	5241.13	0.719583	433.857	12.0803	433.857
CON_06f_m67_001	CON	CON_06f_m67_001.xlsx_RoiSetAuto-213.zip Distance px	112	8419.34	0.987729	433.857	19.4058	433.857
CON_06f_m67_001	CON	CON_06f_m67_001.xlsx_RoiSetAuto-214.zip Distance px	20	5334.53	0.442279	433.857	12.2956	433.857
CON_06f_m67_001	CON	CON_06f_m67_001.xlsx_RoiSetAuto-215.zip Distance px	88	7958.33	0.595601	433.857	18.3432	433.857
CON_06f_m67_001	CON	CON_06f_m67_001.xlsx_RoiSetAuto-216.zip Distance px	16	5597.63	0.749674	433.857	12.902	433.857
CON_06f_m67_001	CON	CON_06f_m67_001.xlsx_RoiSetAuto-217.zip Distance px	20	5607.33	0.111007	433.857	12.9244	433.857
CON_06f_m67_001	CON	CON_06f_m67_001.xlsx_RoiSetAuto-218.zip Distance px	76	8699.43	0.853864	433.857	20.0514	433.857
CON_06f_m67_001	CON	CON_06f_m67_001.xlsx_RoiSetAuto-219.zip Distance px	16	5456.17	0.435233	433.857	12.576	433.857
CON_06f_m67_001	CON	CON_06f_m67_001.xlsx_RoiSetAuto-220.zip Distance px	16	4668.75	0.20155	433.857	10.761	433.857
CON_06f_m67_001	CON	CON_06f_m67_001.xlsx_RoiSetAuto-221.zip Distance px	16	4534.51	0.568315	433.857	10.4516	433.857
CON_06f_m67_001	CON	CON_06f_m67_001.xlsx_RoiSetAuto-223.zip Distance px	16	5378.64	0.396337	433.857	12.3973	433.857
CON_06f_m67_001	CON	CON_06f_m67_001.xlsx_RoiSetAuto-225.zip Distance px	68	6275.68	0.825537	433.857	14.4649	433.857
CON_06f_m67_001	CON	CON_06f_m67_001.xlsx_RoiSetAuto-226.zip Distance px	24	5765.15	0.443802	433.857	13.2881	433.857
CON_06f_m67_001	CON	CON_06f_m67_001.xlsx_RoiSetAuto-227.zip Distance px	28	7439.42	0.723894	433.857	17.1472	433.857
CON_06f_m67_001	CON	CON_06f_m67_001.xlsx_RoiSetAuto-228.zip Distance px	28	5985.3	0.48401	433.857	13.7956	433.857
CON_06f_m67_001	CON	CON_06f_m67_001.xlsx_RoiSetAuto-229.zip Distance px	16	5543.31	0.338243	433.857	12.7768	433.857
CON_06f_m67_001	CON	CON_06f_m67_001.xlsx_RoiSetAuto-230.zip Distance px	56	8294.79	1.00501	433.857	19.1187	433.857
CON_06f_m67_001	CON	CON_06f_m67_001.xlsx_RoiSetAuto-231.zip Distance px	60	7585.01	0.811372	433.857	17.4827	433.857
CON_06f_m67_001	CON	CON_06f_m67_001.xlsx_RoiSetAuto-232.zip Distance px	24	5374.12	0.486717	433.857	12.3869	433.857
CON_06f_m67_001	CON	CON_06f_m67_001.xlsx_RoiSetAuto-233.zip Distance px	28	5809	0.370456	433.857	13.3892	433.857
CON_06f_m67_001	CON	CON_06f_m67_001.xlsx_RoiSetAuto-234.zip Distance px	68	6829.24	1.01153	433.857	15.7408	433.857
CON_06f_m67_001	CON	CON_06f_m67_001.xlsx_RoiSetAuto-235.zip Distance px	72	7676.72	0.890629	433.857	17.6941	433.857
CON_06f_m67_001	CON	CON_06f_m67_001.xlsx_RoiSetAuto-236.zip Distance px	44	5981.34	1.24572	433.857	13.7864	433.857
CON_06f_m67_001	CON	CON_06f_m67_001.xlsx_RoiSetAuto-237.zip Distance px	64	7801.19	0.81011	433.857	17.981	433.857
CON_06f_m67_001	CON	CON_06f_m67_001.xlsx_RoiSetAuto-238.zip Distance px	16	6407.4	0.375572	433.857	14.7685	433.857
CON_06f_m67_001	CON	CON_06f_m67_001.xlsx_RoiSetAuto-239.zip Distance px	48	7489.95	0.903493	433.857	17.2637	433.857
CON_06f_m67_001	CON	CON_06f_m67_001.xlsx_RoiSetAuto-24.zip Distance px	100	7407.11	1.04325	433.857	17.0727	433.857
CON_06f_m67_001	CON	CON_06f_m67_001.xlsx_RoiSetAuto-240.zip Distance px	20	5519.02	0.762949	433.857	12.7208	433.857
CON_06f_m67_001	CON	CON_06f_m67_001.xlsx_RoiSetAuto-242.zip Distance px	28	11119.1	0.494046	433.857	25.6285	433.857
CON_06f_m67_001	CON	CON_06f_m67_001.xlsx_RoiSetAuto-244.zip Distance px	40	6109.89	0.773593	433.857	14.0827	433.857
CON_06f_m67_001	CON	CON_06f_m67_001.xlsx_RoiSetAuto-246.zip Distance px	36	5012.73	0.456294	433.857	11.5539	433.857
CON_06f_m67_001	CON	CON_06f_m67_001.xlsx_RoiSetAuto-247.zip Distance px	16	5578.43	0.377581	433.857	12.8578	433.857
CON_06f_m67_001	CON	CON_06f_m67_001.xlsx_RoiSetAuto-248.zip Distance px	32	6275.2	0.640098	433.857	14.4638	433.857
CON_06f_m67_001	CON	CON_06f_m67_001.xlsx_RoiSetAuto-249.zip Distance px	16	4989.64	0.410783	433.857	11.5007	433.857
CON_06f_m67_001	CON	CON_06f_m67_001.xlsx_RoiSetAuto-250.zip Distance px	16	4224.9	0.224524	433.857	9.73801	433.857
CON_06f_m67_001	CON	CON_06f_m67_001.xlsx_RoiSetAuto-251.zip Distance px	48	7810.12	0.717052	433.857	18.0016	433.857
CON_06f_m67_001	CON	CON_06f_m67_001.xlsx_RoiSetAuto-252.zip Distance px	32	7756.15	0.748475	433.857	17.8772	433.857
CON_06f_m67_001	CON	CON_06f_m67_001.xlsx_RoiSetAuto-253.zip Distance px	32	7637.54	0.641126	433.857	17.6038	433.857
CON_06f_m67_001	CON	CON_06f_m67_001.xlsx_RoiSetAuto-254.zip Distance px	16	4531.45	0.153894	433.857	10.4446	433.857
CON_06f_m67_001	CON	CON_06f_m67_001.xlsx_RoiSetAuto-255.zip Distance px	36	8223.18	0.646703	433.857	18.9537	433.857
CON_06f_m67_001	CON	CON_06f_m67_001.xlsx_RoiSetAuto-258.zip Distance px	24	6182.97	0.615176	433.857	14.2512	433.857
CON_06f_m67_001	CON	CON_06f_m67_001.xlsx_RoiSetAuto-259.zip Distance px	20	7012.13	0.489016	433.857	16.1623	433.857
CON_06f_m67_001	CON	CON_06f_m67_001.xlsx_RoiSetAuto-26.zip Distance px	24	5037.1	0.77199	433.857	11.6101	433.857
CON_06f_m67_001	CON	CON_06f_m67_001.xlsx_RoiSetAuto-262.zip Distance px	24	5747.71	0.714162	433.857	13.248	433.857
CON_06f_m67_001	CON	CON_06f_m67_001.xlsx_RoiSetAuto-263.zip Distance px	20	5811.48	0.841618	433.857	13.3949	433.857
CON_06f_m67_001	CON	CON_06f_m67_001.xlsx_RoiSetAuto-264.zip Distance px	24	4951.17	0.543217	433.857	11.412	433.857
CON_06f_m67_001	CON	CON_06f_m67_001.xlsx_RoiSetAuto-266.zip Distance px	20	5317.09	0.186575	433.857	12.2554	433.857
CON_06f_m67_001	CON	CON_06f_m67_001.xlsx_RoiSetAuto-27.zip Distance px	100	9654.7	1.49499	433.857	22.2532	433.857
CON_06f_m67_001	CON	CON_06f_m67_001.xlsx_RoiSetAuto-3.zip Distance px	32	8167.62	0.527874	433.857	18.8256	433.857
CON_06f_m67_001	CON	CON_06f_m67_001.xlsx_RoiSetAuto-31.zip Distance px	224	9044.28	1.76274	433.857	20.8462	433.857
CON_06f_m67_001	CON	CON_06f_m67_001.xlsx_RoiSetAuto-32.zip Distance px	84	4736.18	0.471654	433.857	10.9165	433.857
CON_06f_m67_001	CON	CON_06f_m67_001.xlsx_RoiSetAuto-34.zip Distance px	56	5326.95	0.80171	433.857	12.2781	433.857
CON_06f_m67_001	CON	CON_06f_m67_001.xlsx_RoiSetAuto-35.zip Distance px	16	5432.76	0.416472	433.857	12.522	433.857
CON_06f_m67_001	CON	CON_06f_m67_001.xlsx_RoiSetAuto-36.zip Distance px	28	4930.41	0.592533	433.857	11.3641	433.857
CON_06f_m67_001	CON	CON_06f_m67_001.xlsx_RoiSetAuto-37.zip Distance px	72	28017.5	0.443851	433.857	64.5777	433.857
CON_06f_m67_001	CON	CON_06f_m67_001.xlsx_RoiSetAuto-38.zip Distance px	32	6511.18	0.813554	433.857	15.0077	433.857
CON_06f_m67_001	CON	CON_06f_m67_001.xlsx_RoiSetAuto-4.zip Distance px	48	11534.7	0.494964	433.857	26.5865	433.857
CON_06f_m67_001	CON	CON_06f_m67_001.xlsx_RoiSetAuto-41.zip Distance px	56	6370.81	0.945022	433.857	14.6841	433.857
CON_06f_m67_001	CON	CON_06f_m67_001.xlsx_RoiSetAuto-42.zip Distance px	68	10619.2	0.939806	433.857	24.4763	433.857
CON_06f_m67_001	CON	CON_06f_m67_001.xlsx_RoiSetAuto-43.zip Distance px	24	4990.7	0.658774	433.857	11.5031	433.857
CON_06f_m67_001	CON	CON_06f_m67_001.xlsx_RoiSetAuto-45.zip Distance px	20	4261.13	0.485237	433.857	9.82152	433.857
CON_06f_m67_001	CON	CON_06f_m67_001.xlsx_RoiSetAuto-46.zip Distance px	24	4212.69	0.504847	433.857	9.70987	433.857
CON_06f_m67_001	CON	CON_06f_m67_001.xlsx_RoiSetAuto-47.zip Distance px	16	4024.78	0.309458	433.857	9.27676	433.857
		CON_06f_m67_001.xlsx_RoiSetAuto-48.zip Distance px	16	4250.36	0.096354
		CON_06f_m67_001.xlsx_RoiSetAuto-49.zip Distance px	76	6888.47	1.19989
		CON_06f_m67_001.xlsx_RoiSetAuto-5.zip Distance px	56	3408.47	0.776067
CON_06f_m67_001	CON	CON_06f_m67_001.xlsx_RoiSetAuto-50.zip Distance px	36	4645.26	1.00472	433.857	10.7069	433.857
CON_06f_m67_001	CON	CON_06f_m67_001.xlsx_RoiSetAuto-51.zip Distance px	24	4431.29	0.551252	433.857	10.2137	433.857
CON_06f_m67_001	CON	CON_06f_m67_001.xlsx_RoiSetAuto-52.zip Distance px	48	8420.38	1.04306	433.857	19.4082	433.857
CON_06f_m67_001	CON	CON_06f_m67_001.xlsx_RoiSetAuto-54.zip Distance px	20	4453.16	0.509342	433.857	10.2641	433.857
CON_06f_m67_001	CON	CON_06f_m67_001.xlsx_RoiSetAuto-56.zip Distance px	16	4864.95	0.461781	433.857	11.2133	433.857
CON_06f_m67_001	CON	CON_06f_m67_001.xlsx_RoiSetAuto-57.zip Distance px	24	4684.39	1.00095	433.857	10.7971	433.857
CON_06f_m67_001	CON	CON_06f_m67_001.xlsx_RoiSetAuto-59.zip Distance px	36	4122.53	0.527945	433.857	9.50206	433.857
CON_06f_m67_001	CON	CON_06f_m67_001.xlsx_RoiSetAuto-6.zip Distance px	64	7690.14	0.925288	433.857	17.7251	433.857
CON_06f_m67_001	CON	CON_06f_m67_001.xlsx_RoiSetAuto-61.zip Distance px	32	8237.75	0.95831	433.857	18.9873	433.857
CON_06f_m67_001	CON	CON_06f_m67_001.xlsx_RoiSetAuto-64.zip Distance px	24	4772.85	0.761709	433.857	11.001	433.857
CON_06f_m67_001	CON	CON_06f_m67_001.xlsx_RoiSetAuto-66.zip Distance px	32	4566.46	0.489468	433.857	10.5253	433.857
CON_06f_m67_001	CON	CON_06f_m67_001.xlsx_RoiSetAuto-67.zip Distance px	28	6616.03	1.16528	433.857	15.2493	433.857
CON_06f_m67_001	CON	CON_06f_m67_001.xlsx_RoiSetAuto-68.zip Distance px	20	4328.17	0.391933	433.857	9.97603	433.857
CON_06f_m67_001	CON	CON_06f_m67_001.xlsx_RoiSetAuto-69.zip Distance px	36	6522.22	1.1844	433.857	15.0331	433.857
CON_06f_m67_001	CON	CON_06f_m67_001.xlsx_RoiSetAuto-7.zip Distance px	16	7912.73	0.155861	433.857	18.2381	433.857
CON_06f_m67_001	CON	CON_06f_m67_001.xlsx_RoiSetAuto-71.zip Distance px	60	6388.47	1.28943	433.857	14.7248	433.857
CON_06f_m67_001	CON	CON_06f_m67_001.xlsx_RoiSetAuto-73.zip Distance px	20	5166.77	0.607145	433.857	11.9089	433.857
CON_06f_m67_001	CON	CON_06f_m67_001.xlsx_RoiSetAuto-74.zip Distance px	16	4519.48	0.492753	433.857	10.417	433.857
CON_06f_m67_001	CON	CON_06f_m67_001.xlsx_RoiSetAuto-75.zip Distance px	16	4450.89	0.254166	433.857	10.2589	433.857
CON_06f_m67_001	CON	CON_06f_m67_001.xlsx_RoiSetAuto-76.zip Distance px	16	5428.7	0.48743	433.857	12.5127	433.857
CON_06f_m67_001	CON	CON_06f_m67_001.xlsx_RoiSetAuto-77.zip Distance px	24	4298.38	0.626589	433.857	9.90738	433.857
CON_06f_m67_001	CON	CON_06f_m67_001.xlsx_RoiSetAuto-8.zip Distance px	16	4820.49	0.11205	433.857	11.1108	433.857
CON_06f_m67_001	CON	CON_06f_m67_001.xlsx_RoiSetAuto-80.zip Distance px	24	3055.95	0.577856	433.857	7.04369	433.857
CON_06f_m67_001	CON	CON_06f_m67_001.xlsx_RoiSetAuto-81.zip Distance px	72	9511.1	1.14843	433.857	21.9222	433.857
CON_06f_m67_001	CON	CON_06f_m67_001.xlsx_RoiSetAuto-82.zip Distance px	100	7274.83	1.08834	433.857	16.7678	433.857
CON_06f_m67_001	CON	CON_06f_m67_001.xlsx_RoiSetAuto-83.zip Distance px	16	4801.26	0.521869	433.857	11.0665	433.857
CON_06f_m67_001	CON	CON_06f_m67_001.xlsx_RoiSetAuto-84.zip Distance px	16	7175.71	0.208656	433.857	16.5393	433.857
CON_06f_m67_001	CON	CON_06f_m67_001.xlsx_RoiSetAuto-85.zip Distance px	16	4586.94	0.37966	433.857	10.5725	433.857
CON_06f_m67_001	CON	CON_06f_m67_001.xlsx_RoiSetAuto-86.zip Distance px	20	3672.27	0.34347	433.857	8.46426	433.857
CON_06f_m67_001	CON	CON_06f_m67_001.xlsx_RoiSetAuto-88.zip Distance px	32	5070.62	0.755337	433.857	11.6873	433.857
CON_06f_m67_001	CON	CON_06f_m67_001.xlsx_RoiSetAuto-89.zip Distance px	20	4716.44	0.447702	433.857	10.871	433.857
CON_06f_m67_001	CON	CON_06f_m67_001.xlsx_RoiSetAuto-9.zip Distance px	16	6990.92	0.35004	433.857	16.1134	433.857
CON_06f_m67_001	CON	CON_06f_m67_001.xlsx_RoiSetAuto-90.zip Distance px	56	8978.93	0.823494	433.857	20.6956	433.857
CON_06f_m67_001	CON	CON_06f_m67_001.xlsx_RoiSetAuto-92.zip Distance px	100	8235.18	1.06142	433.857	18.9813	433.857
CON_06f_m67_001	CON	CON_06f_m67_001.xlsx_RoiSetAuto-93.zip Distance px	212	9663.05	1.55973	433.857	22.2724	433.857
CON_06f_m67_001	CON	CON_06f_m67_001.xlsx_RoiSetAuto-94.zip Distance px	44	8163.69	0.981427	433.857	18.8165	433.857
CON_06f_m67_001	CON	CON_06f_m67_001.xlsx_RoiSetAuto-95.zip Distance px	44	10612.6	1.05549	433.857	24.4611	433.857
CON_06f_m67_001	CON	CON_06f_m67_001.xlsx_RoiSetAuto-96.zip Distance px	24	4415.04	0.583837	433.857	10.1763	433.857
CON_06f_m67_001	CON	CON_06f_m67_001.xlsx_RoiSetAuto-97.zip Distance px	16	4672.12	0.590212	433.857	10.7688	433.857
CON_06f_m67_002	CON	CON_06f_m67_002.xlsx_RoiSetAuto-1.zip Distance px	72	10771.4	0.778598	506.278	21.2757	506.278
CON_06f_m67_002	CON	CON_06f_m67_002.xlsx_RoiSetAuto-10.zip Distance px	48	6350.91	0.884029	506.278	12.5443	506.278
CON_06f_m67_002	CON	CON_06f_m67_002.xlsx_RoiSetAuto-13.zip Distance px	16	4647.24	0.440037	506.278	9.17922	506.278
CON_06f_m67_002	CON	CON_06f_m67_002.xlsx_RoiSetAuto-14.zip Distance px	20	5538.87	0.326911	506.278	10.9404	506.278
CON_06f_m67_002	CON	CON_06f_m67_002.xlsx_RoiSetAuto-15.zip Distance px	128	7672.54	0.904046	506.278	15.1548	506.278
CON_06f_m67_002	CON	CON_06f_m67_002.xlsx_RoiSetAuto-16.zip Distance px	40	5495.12	0.572248	506.278	10.854	506.278
CON_06f_m67_002	CON	CON_06f_m67_002.xlsx_RoiSetAuto-18.zip Distance px	52	8184.49	0.876868	506.278	16.166	506.278
CON_06f_m67_002	CON	CON_06f_m67_002.xlsx_RoiSetAuto-19.zip Distance px	32	6333.28	0.622382	506.278	12.5095	506.278
CON_06f_m67_002	CON	CON_06f_m67_002.xlsx_RoiSetAuto-2.zip Distance px	48	6636.18	1.16404	506.278	13.1078	506.278
CON_06f_m67_002	CON	CON_06f_m67_002.xlsx_RoiSetAuto-20.zip Distance px	20	6016.82	0.686343	506.278	11.8844	506.278
CON_06f_m67_002	CON	CON_06f_m67_002.xlsx_RoiSetAuto-24.zip Distance px	76	7404.28	1.12741	506.278	14.6249	506.278
CON_06f_m67_002	CON	CON_06f_m67_002.xlsx_RoiSetAuto-25.zip Distance px	40	8121.37	0.671572	506.278	16.0413	506.278
CON_06f_m67_002	CON	CON_06f_m67_002.xlsx_RoiSetAuto-26.zip Distance px	16	6524.96	0.470952	506.278	12.8881	506.278
CON_06f_m67_002	CON	CON_06f_m67_002.xlsx_RoiSetAuto-27.zip Distance px	72	8182.44	1.02847	506.278	16.162	506.278
CON_06f_m67_002	CON	CON_06f_m67_002.xlsx_RoiSetAuto-28.zip Distance px	104	8530.77	1.36061	506.278	16.85	506.278
CON_06f_m67_002	CON	CON_06f_m67_002.xlsx_RoiSetAuto-3.zip Distance px	64	9293.02	1.12772	506.278	18.3556	506.278
CON_06f_m67_002	CON	CON_06f_m67_002.xlsx_RoiSetAuto-30.zip Distance px	24	5109.63	0.222493	506.278	10.0925	506.278
CON_06f_m67_002	CON	CON_06f_m67_002.xlsx_RoiSetAuto-31.zip Distance px	84	9452.24	1.46547	506.278	18.6701	506.278
CON_06f_m67_002	CON	CON_06f_m67_002.xlsx_RoiSetAuto-32.zip Distance px	16	5851.42	0.341	506.278	11.5577	506.278
CON_06f_m67_002	CON	CON_06f_m67_002.xlsx_RoiSetAuto-33.zip Distance px	16	6407.04	0.351025	506.278	12.6552	506.278
CON_06f_m67_002	CON	CON_06f_m67_002.xlsx_RoiSetAuto-34.zip Distance px	24	7455.71	0.464333	506.278	14.7265	506.278
CON_06f_m67_002	CON	CON_06f_m67_002.xlsx_RoiSetAuto-35.zip Distance px	24	5887.71	0.709839	506.278	11.6294	506.278
CON_06f_m67_002	CON	CON_06f_m67_002.xlsx_RoiSetAuto-37.zip Distance px	24	7853.16	0.603455	506.278	15.5116	506.278
CON_06f_m67_002	CON	CON_06f_m67_002.xlsx_RoiSetAuto-38.zip Distance px	68	7034.81	0.773934	506.278	13.8952	506.278
CON_06f_m67_002	CON	CON_06f_m67_002.xlsx_RoiSetAuto-4.zip Distance px	104	14247.5	1.136	506.278	28.1416	506.278
CON_06f_m67_002	CON	CON_06f_m67_002.xlsx_RoiSetAuto-40.zip Distance px	40	5787.3	0.911424	506.278	11.4311	506.278
CON_06f_m67_002	CON	CON_06f_m67_002.xlsx_RoiSetAuto-41.zip Distance px	16	10723.5	0.330662	506.278	21.181	506.278
CON_06f_m67_002	CON	CON_06f_m67_002.xlsx_RoiSetAuto-42.zip Distance px	32	7743.9	0.741463	506.278	15.2958	506.278
CON_06f_m67_002	CON	CON_06f_m67_002.xlsx_RoiSetAuto-45.zip Distance px	20	7902.2	0.44619	506.278	15.6084	506.278
CON_06f_m67_002	CON	CON_06f_m67_002.xlsx_RoiSetAuto-47.zip Distance px	16	7128.74	0.447255	506.278	14.0807	506.278
CON_06f_m67_002	CON	CON_06f_m67_002.xlsx_RoiSetAuto-48.zip Distance px	52	7147.23	1.12814	506.278	14.1172	506.278
CON_06f_m67_002	CON	CON_06f_m67_002.xlsx_RoiSetAuto-49.zip Distance px	16	5588.62	0.447559	506.278	11.0386	506.278
CON_06f_m67_002	CON	CON_06f_m67_002.xlsx_RoiSetAuto-50.zip Distance px	48	7945.86	1.02873	506.278	15.6947	506.278
CON_06f_m67_002	CON	CON_06f_m67_002.xlsx_RoiSetAuto-52.zip Distance px	60	8619.4	0.723234	506.278	17.025	506.278
CON_06f_m67_002	CON	CON_06f_m67_002.xlsx_RoiSetAuto-53.zip Distance px	16	7455.06	0.475183	506.278	14.7252	506.278
CON_06f_m67_002	CON	CON_06f_m67_002.xlsx_RoiSetAuto-54.zip Distance px	24	7538.39	0.518445	506.278	14.8898	506.278
CON_06f_m67_002	CON	CON_06f_m67_002.xlsx_RoiSetAuto-55.zip Distance px	24	6687.46	0.556446	506.278	13.2091	506.278
CON_06f_m67_002	CON	CON_06f_m67_002.xlsx_RoiSetAuto-56.zip Distance px	56	8380.56	1.08555	506.278	16.5533	506.278
CON_06f_m67_002	CON	CON_06f_m67_002.xlsx_RoiSetAuto-57.zip Distance px	28	13632.5	0.467659	506.278	26.927	506.278
CON_06f_m67_002	CON	CON_06f_m67_002.xlsx_RoiSetAuto-58.zip Distance px	36	8409.25	0.460016	506.278	16.61	506.278
CON_06f_m67_002	CON	CON_06f_m67_002.xlsx_RoiSetAuto-59.zip Distance px	76	11162.3	0.998653	506.278	22.0478	506.278
CON_06f_m67_002	CON	CON_06f_m67_002.xlsx_RoiSetAuto-60.zip Distance px	24	6628.17	0.566362	506.278	13.092	506.278
CON_06f_m67_002	CON	CON_06f_m67_002.xlsx_RoiSetAuto-61.zip Distance px	44	12648.7	0.850917	506.278	24.9838	506.278
CON_06f_m67_002	CON	CON_06f_m67_002.xlsx_RoiSetAuto-62.zip Distance px	28	12211	0.690949	506.278	24.1191	506.278
CON_06f_m67_002	CON	CON_06f_m67_002.xlsx_RoiSetAuto-63.zip Distance px	24	8867.68	0.711193	506.278	17.5154	506.278
CON_06f_m67_002	CON	CON_06f_m67_002.xlsx_RoiSetAuto-7.zip Distance px	36	7838.6	0.66819	506.278	15.4828	506.278
CON_06f_m67_002	CON	CON_06f_m67_002.xlsx_RoiSetAuto-8.zip Distance px	68	9448.89	0.836978	506.278	18.6635	506.278
CON_06f_m67_002	CON	CON_06f_m67_002.xlsx_RoiSetAuto-9.zip Distance px	60	7475.39	1.0642	506.278	14.7654	506.278
WSP_01f_m67_001	WSP	WSP_01f_m67_001.xlsx_RoiSetAuto-1.zip Distance px	124	13506.1	1.45563	616.716	21.9	616.716
WSP_01f_m67_001	WSP	WSP_01f_m67_001.xlsx_RoiSetAuto-10.zip Distance px	44	7355.76	0.623582	616.716	11.9273	616.716
WSP_01f_m67_001	WSP	WSP_01f_m67_001.xlsx_RoiSetAuto-11.zip Distance px	20	5959.78	0.404419	616.716	9.66373	616.716
WSP_01f_m67_001	WSP	WSP_01f_m67_001.xlsx_RoiSetAuto-13.zip Distance px	28	5948.1	0.550637	616.716	9.64478	616.716
WSP_01f_m67_001	WSP	WSP_01f_m67_001.xlsx_RoiSetAuto-14.zip Distance px	32	6386.7	0.670693	616.716	10.356	616.716
WSP_01f_m67_001	WSP	WSP_01f_m67_001.xlsx_RoiSetAuto-15.zip Distance px	28	6370.2	0.421724	616.716	10.3292	616.716
WSP_01f_m67_001	WSP	WSP_01f_m67_001.xlsx_RoiSetAuto-16.zip Distance px	52	7014.92	0.549108	616.716	11.3746	616.716
WSP_01f_m67_001	WSP	WSP_01f_m67_001.xlsx_RoiSetAuto-19.zip Distance px	32	5681.23	0.541671	616.716	9.21206	616.716
WSP_01f_m67_001	WSP	WSP_01f_m67_001.xlsx_RoiSetAuto-2.zip Distance px	60	16198.6	0.675732	616.716	26.2659	616.716
WSP_01f_m67_001	WSP	WSP_01f_m67_001.xlsx_RoiSetAuto-20.zip Distance px	44	8339.39	0.398734	616.716	13.5222	616.716
WSP_01f_m67_001	WSP	WSP_01f_m67_001.xlsx_RoiSetAuto-21.zip Distance px	64	8652.01	0.658855	616.716	14.0292	616.716
WSP_01f_m67_001	WSP	WSP_01f_m67_001.xlsx_RoiSetAuto-22.zip Distance px	28	5883.12	0.509166	616.716	9.53943	616.716
WSP_01f_m67_001	WSP	WSP_01f_m67_001.xlsx_RoiSetAuto-23.zip Distance px	144	10844.2	0.907797	616.716	17.5838	616.716
WSP_01f_m67_001	WSP	WSP_01f_m67_001.xlsx_RoiSetAuto-24.zip Distance px	68	8276.12	0.566352	616.716	13.4197	616.716
WSP_01f_m67_001	WSP	WSP_01f_m67_001.xlsx_RoiSetAuto-25.zip Distance px	144	10605.4	1.07596	616.716	17.1966	616.716
WSP_01f_m67_001	WSP	WSP_01f_m67_001.xlsx_RoiSetAuto-27.zip Distance px	100	8961.91	0.78437	616.716	14.5317	616.716
WSP_01f_m67_001	WSP	WSP_01f_m67_001.xlsx_RoiSetAuto-3.zip Distance px	72	10201.9	0.455845	616.716	16.5423	616.716
WSP_01f_m67_001	WSP	WSP_01f_m67_001.xlsx_RoiSetAuto-31.zip Distance px	68	9308.58	0.78655	616.716	15.0938	616.716
WSP_01f_m67_001	WSP	WSP_01f_m67_001.xlsx_RoiSetAuto-5.zip Distance px	352	15460.1	1.04015	616.716	25.0685	616.716
WSP_01f_m67_001	WSP	WSP_01f_m67_001.xlsx_RoiSetAuto-7.zip Distance px	36	8388.41	0.52935	616.716	13.6017	616.716
WSP_01f_m67_001	WSP	WSP_01f_m67_001.xlsx_RoiSetAuto-8.zip Distance px	28	7357.5	0.517905	616.716	11.9301	616.716
WSP_01f_m67_001	WSP	WSP_01f_m67_001.xlsx_RoiSetAuto-9.zip Distance px	72	8014.41	0.867644	616.716	12.9953	616.716
WSP_01f_m67_002	WSP	WSP_01f_m67_002.xlsx_RoiSetAuto-1.zip Distance px	16	6194.01	0.333015	814.225	7.60724	814.225
WSP_01f_m67_002	WSP	WSP_01f_m67_002.xlsx_RoiSetAuto-11.zip Distance px	20	9400.21	0.179939	814.225	11.545	814.225
WSP_01f_m67_002	WSP	WSP_01f_m67_002.xlsx_RoiSetAuto-12.zip Distance px	20	9566.71	0.537555	814.225	11.7495	814.225
WSP_01f_m67_002	WSP	WSP_01f_m67_002.xlsx_RoiSetAuto-13.zip Distance px	20	8619.53	0.709195	814.225	10.5862	814.225
WSP_01f_m67_002	WSP	WSP_01f_m67_002.xlsx_RoiSetAuto-14.zip Distance px	32	8945.33	0.329566	814.225	10.9863	814.225
WSP_01f_m67_002	WSP	WSP_01f_m67_002.xlsx_RoiSetAuto-15.zip Distance px	20	7086.4	0.243451	814.225	8.70324	814.225
WSP_01f_m67_002	WSP	WSP_01f_m67_002.xlsx_RoiSetAuto-16.zip Distance px	40	8613.25	0.577559	814.225	10.5785	814.225
WSP_01f_m67_002	WSP	WSP_01f_m67_002.xlsx_RoiSetAuto-17.zip Distance px	192	16287.9	0.967771	814.225	20.0042	814.225
WSP_01f_m67_002	WSP	WSP_01f_m67_002.xlsx_RoiSetAuto-18.zip Distance px	24	9563.9	0.272426	814.225	11.746	814.225
WSP_01f_m67_002	WSP	WSP_01f_m67_002.xlsx_RoiSetAuto-20.zip Distance px	20	10043.3	0.40137	814.225	12.3347	814.225
WSP_01f_m67_002	WSP	WSP_01f_m67_002.xlsx_RoiSetAuto-23.zip Distance px	84	14982.1	1.03227	814.225	18.4005	814.225
WSP_01f_m67_002	WSP	WSP_01f_m67_002.xlsx_RoiSetAuto-24.zip Distance px	20	10442.2	0.74739	814.225	12.8247	814.225
WSP_01f_m67_002	WSP	WSP_01f_m67_002.xlsx_RoiSetAuto-25.zip Distance px	16	9288.74	0.434633	814.225	11.4081	814.225
WSP_01f_m67_002	WSP	WSP_01f_m67_002.xlsx_RoiSetAuto-27.zip Distance px	44	13236.7	0.301535	814.225	16.2568	814.225
WSP_01f_m67_002	WSP	WSP_01f_m67_002.xlsx_RoiSetAuto-28.zip Distance px	60	12348.9	0.391511	814.225	15.1664	814.225
WSP_01f_m67_002	WSP	WSP_01f_m67_002.xlsx_RoiSetAuto-29.zip Distance px	24	15418.9	0.479843	814.225	18.9369	814.225
WSP_01f_m67_002	WSP	WSP_01f_m67_002.xlsx_RoiSetAuto-3.zip Distance px	68	11001.7	0.637326	814.225	13.5118	814.225
WSP_01f_m67_002	WSP	WSP_01f_m67_002.xlsx_RoiSetAuto-4.zip Distance px	300	21925.6	1.27335	814.225	26.9281	814.225
WSP_01f_m67_002	WSP	WSP_01f_m67_002.xlsx_RoiSetAuto-5.zip Distance px	300	16946.9	1.21101	814.225	20.8135	814.225
WSP_01f_m67_002	WSP	WSP_01f_m67_002.xlsx_RoiSetAuto-6.zip Distance px	120	10986.9	0.929735	814.225	13.4937	814.225
WSP_01f_m67_002	WSP	WSP_01f_m67_002.xlsx_RoiSetAuto-7.zip Distance px	16	8455.93	0.429314	814.225	10.3852	814.225
WSP_01f_m67_002	WSP	WSP_01f_m67_002.xlsx_RoiSetAuto-8.zip Distance px	36	6958.5	0.583286	814.225	8.54616	814.225
WSP_01f_m67_002	WSP	WSP_01f_m67_002.xlsx_RoiSetAuto-9.zip Distance px	20	6385.9	0.247772	814.225	7.84291	814.225
WSP_03f_m67_001	WSP	WSP_03f_m67_001.xlsx_RoiSetAuto-1.zip Distance px	60	12384.4	0.490395	1158.34	10.6915	1158.34
WSP_03f_m67_001	WSP	WSP_03f_m67_001.xlsx_RoiSetAuto-10.zip Distance px	348	28430.8	0.966755	1158.34	24.5444	1158.34
WSP_03f_m67_001	WSP	WSP_03f_m67_001.xlsx_RoiSetAuto-12.zip Distance px	20	11483.9	0.321166	1158.34	9.91411	1158.34
WSP_03f_m67_001	WSP	WSP_03f_m67_001.xlsx_RoiSetAuto-13.zip Distance px	36	11295.9	0.377383	1158.34	9.75182	1158.34
WSP_03f_m67_001	WSP	WSP_03f_m67_001.xlsx_RoiSetAuto-14.zip Distance px	20	9195.98	0.298368	1158.34	7.93892	1158.34
WSP_03f_m67_001	WSP	WSP_03f_m67_001.xlsx_RoiSetAuto-15.zip Distance px	124	26164.8	1.08305	1158.34	22.5881	1158.34
WSP_03f_m67_001	WSP	WSP_03f_m67_001.xlsx_RoiSetAuto-17.zip Distance px	16	8004.27	0.441867	1158.34	6.91011	1158.34
WSP_03f_m67_001	WSP	WSP_03f_m67_001.xlsx_RoiSetAuto-18.zip Distance px	20	11678.1	0.292117	1158.34	10.0818	1158.34
WSP_03f_m67_001	WSP	WSP_03f_m67_001.xlsx_RoiSetAuto-19.zip Distance px	68	7081.59	0.606766	1158.34	6.11356	1158.34
WSP_03f_m67_001	WSP	WSP_03f_m67_001.xlsx_RoiSetAuto-2.zip Distance px	16	15194.9	0.746657	1158.34	13.1178	1158.34
WSP_03f_m67_001	WSP	WSP_03f_m67_001.xlsx_RoiSetAuto-20.zip Distance px	104	19442.7	1.0464	1158.34	16.7849	1158.34
WSP_03f_m67_001	WSP	WSP_03f_m67_001.xlsx_RoiSetAuto-22.zip Distance px	40	12595.1	0.41577	1158.34	10.8734	1158.34
WSP_03f_m67_001	WSP	WSP_03f_m67_001.xlsx_RoiSetAuto-23.zip Distance px	108	18500.4	0.799725	1158.34	15.9714	1158.34
WSP_03f_m67_001	WSP	WSP_03f_m67_001.xlsx_RoiSetAuto-24.zip Distance px	52	12841.4	0.762025	1158.34	11.086	1158.34
WSP_03f_m67_001	WSP	WSP_03f_m67_001.xlsx_RoiSetAuto-25.zip Distance px	116	16400.8	1.03256	1158.34	14.1589	1158.34
WSP_03f_m67_001	WSP	WSP_03f_m67_001.xlsx_RoiSetAuto-26.zip Distance px	24	8319.15	0.982225	1158.34	7.18195	1158.34
WSP_03f_m67_001	WSP	WSP_03f_m67_001.xlsx_RoiSetAuto-27.zip Distance px	20	12518.7	0.28393	1158.34	10.8074	1158.34
WSP_03f_m67_001	WSP	WSP_03f_m67_001.xlsx_RoiSetAuto-28.zip Distance px	108	15317.1	0.768001	1158.34	13.2233	1158.34
WSP_03f_m67_001	WSP	WSP_03f_m67_001.xlsx_RoiSetAuto-29.zip Distance px	56	12919.3	0.708336	1158.34	11.1533	1158.34
WSP_03f_m67_001	WSP	WSP_03f_m67_001.xlsx_RoiSetAuto-3.zip Distance px	60	17288.6	0.551395	1158.34	14.9253	1158.34
WSP_03f_m67_001	WSP	WSP_03f_m67_001.xlsx_RoiSetAuto-30.zip Distance px	44	13324.7	0.661932	1158.34	11.5032	1158.34
WSP_03f_m67_001	WSP	WSP_03f_m67_001.xlsx_RoiSetAuto-31.zip Distance px	20	13341.2	0.463203	1158.34	11.5175	1158.34
WSP_03f_m67_001	WSP	WSP_03f_m67_001.xlsx_RoiSetAuto-32.zip Distance px	44	14525	0.590812	1158.34	12.5395	1158.34
WSP_03f_m67_001	WSP	WSP_03f_m67_001.xlsx_RoiSetAuto-33.zip Distance px	52	13331.2	0.516392	1158.34	11.5088	1158.34
WSP_03f_m67_001	WSP	WSP_03f_m67_001.xlsx_RoiSetAuto-34.zip Distance px	28	11874.6	0.615697	1158.34	10.2513	1158.34
WSP_03f_m67_001	WSP	WSP_03f_m67_001.xlsx_RoiSetAuto-35.zip Distance px	44	11784.3	0.430946	1158.34	10.1734	1158.34
WSP_03f_m67_001	WSP	WSP_03f_m67_001.xlsx_RoiSetAuto-36.zip Distance px	44	7431.49	0.474498	1158.34	6.41563	1158.34
WSP_03f_m67_001	WSP	WSP_03f_m67_001.xlsx_RoiSetAuto-37.zip Distance px	156	12200.4	1.35846	1158.34	10.5326	1158.34
WSP_03f_m67_001	WSP	WSP_03f_m67_001.xlsx_RoiSetAuto-38.zip Distance px	44	7674	0.679657	1158.34	6.62499	1158.34
WSP_03f_m67_001	WSP	WSP_03f_m67_001.xlsx_RoiSetAuto-39.zip Distance px	16	11356.3	0.354825	1158.34	9.8039	1158.34
WSP_03f_m67_001	WSP	WSP_03f_m67_001.xlsx_RoiSetAuto-4.zip Distance px	20	12069.4	0.452414	1158.34	10.4196	1158.34
WSP_03f_m67_001	WSP	WSP_03f_m67_001.xlsx_RoiSetAuto-40.zip Distance px	172	17856.3	1.0893	1158.34	15.4154	1158.34
WSP_03f_m67_001	WSP	WSP_03f_m67_001.xlsx_RoiSetAuto-41.zip Distance px	16	10609.6	0.339419	1158.34	9.15926	1158.34
WSP_03f_m67_001	WSP	WSP_03f_m67_001.xlsx_RoiSetAuto-42.zip Distance px	20	14094.7	0.481386	1158.34	12.168	1158.34
WSP_03f_m67_001	WSP	WSP_03f_m67_001.xlsx_RoiSetAuto-43.zip Distance px	20	13807	0.380788	1158.34	11.9196	1158.34
WSP_03f_m67_001	WSP	WSP_03f_m67_001.xlsx_RoiSetAuto-44.zip Distance px	16	6264.79	0.489395	1158.34	5.40842	1158.34
WSP_03f_m67_001	WSP	WSP_03f_m67_001.xlsx_RoiSetAuto-45.zip Distance px	36	11360.4	0.49254	1158.34	9.80745	1158.34
WSP_03f_m67_001	WSP	WSP_03f_m67_001.xlsx_RoiSetAuto-46.zip Distance px	32	12905.7	0.567511	1158.34	11.1415	1158.34
WSP_03f_m67_001	WSP	WSP_03f_m67_001.xlsx_RoiSetAuto-47.zip Distance px	16	11234.5	0.4774	1158.34	9.69876	1158.34
WSP_03f_m67_001	WSP	WSP_03f_m67_001.xlsx_RoiSetAuto-48.zip Distance px	72	17769.1	0.805291	1158.34	15.3401	1158.34
WSP_03f_m67_001	WSP	WSP_03f_m67_001.xlsx_RoiSetAuto-49.zip Distance px	20	12668.2	0.349746	1158.34	10.9365	1158.34
WSP_03f_m67_001	WSP	WSP_03f_m67_001.xlsx_RoiSetAuto-5.zip Distance px	40	11957.9	0.455972	1158.34	10.3233	1158.34
WSP_03f_m67_001	WSP	WSP_03f_m67_001.xlsx_RoiSetAuto-50.zip Distance px	16	15963.7	0.583154	1158.34	13.7816	1158.34
WSP_03f_m67_001	WSP	WSP_03f_m67_001.xlsx_RoiSetAuto-51.zip Distance px	24	11690.5	0.353849	1158.34	10.0924	1158.34
WSP_03f_m67_001	WSP	WSP_03f_m67_001.xlsx_RoiSetAuto-52.zip Distance px	40	15164.2	0.825923	1158.34	13.0913	1158.34
WSP_03f_m67_001	WSP	WSP_03f_m67_001.xlsx_RoiSetAuto-53.zip Distance px	20	6858.63	0.331099	1158.34	5.92108	1158.34
WSP_03f_m67_001	WSP	WSP_03f_m67_001.xlsx_RoiSetAuto-54.zip Distance px	92	14262.7	0.716911	1158.34	12.313	1158.34
WSP_03f_m67_001	WSP	WSP_03f_m67_001.xlsx_RoiSetAuto-55.zip Distance px	16	11955.1	0.211298	1158.34	10.3209	1158.34
WSP_03f_m67_001	WSP	WSP_03f_m67_001.xlsx_RoiSetAuto-56.zip Distance px	72	9723.38	0.643092	1158.34	8.39423	1158.34
WSP_03f_m67_001	WSP	WSP_03f_m67_001.xlsx_RoiSetAuto-57.zip Distance px	20	10624.3	0.289069	1158.34	9.17204	1158.34
WSP_03f_m67_001	WSP	WSP_03f_m67_001.xlsx_RoiSetAuto-58.zip Distance px	20	13833.9	0.336	1158.34	11.9428	1158.34
WSP_03f_m67_001	WSP	WSP_03f_m67_001.xlsx_RoiSetAuto-59.zip Distance px	20	11326.6	0.512594	1158.34	9.77829	1158.34
WSP_03f_m67_001	WSP	WSP_03f_m67_001.xlsx_RoiSetAuto-6.zip Distance px	16	10719	0.12864	1158.34	9.25377	1158.34
WSP_03f_m67_001	WSP	WSP_03f_m67_001.xlsx_RoiSetAuto-7.zip Distance px	32	14076.9	0.410074	1158.34	12.1527	1158.34
WSP_03f_m67_001	WSP	WSP_03f_m67_001.xlsx_RoiSetAuto-9.zip Distance px	52	10918.9	0.516893	1158.34	9.42632	1158.34
WSP_03f_m67_002	WSP	WSP_03f_m67_002.xlsx_RoiSetAuto-1.zip Distance px	48	10728.7	0.651043	855.763	12.537	855.763
WSP_03f_m67_002	WSP	WSP_03f_m67_002.xlsx_RoiSetAuto-10.zip Distance px	16	7661.72	0.0665106	855.763	8.95309	855.763
WSP_03f_m67_002	WSP	WSP_03f_m67_002.xlsx_RoiSetAuto-11.zip Distance px	24	7625.28	0.293026	855.763	8.91051	855.763
WSP_03f_m67_002	WSP	WSP_03f_m67_002.xlsx_RoiSetAuto-12.zip Distance px	28	8699.58	0.393722	855.763	10.1659	855.763
WSP_03f_m67_002	WSP	WSP_03f_m67_002.xlsx_RoiSetAuto-13.zip Distance px	52	8652	0.45431	855.763	10.1103	855.763
WSP_03f_m67_002	WSP	WSP_03f_m67_002.xlsx_RoiSetAuto-14.zip Distance px	16	8430.47	0.207491	855.763	9.85141	855.763
WSP_03f_m67_002	WSP	WSP_03f_m67_002.xlsx_RoiSetAuto-15.zip Distance px	16	11556	0.388346	855.763	13.5038	855.763
WSP_03f_m67_002	WSP	WSP_03f_m67_002.xlsx_RoiSetAuto-16.zip Distance px	20	9322.77	0.272544	855.763	10.8941	855.763
WSP_03f_m67_002	WSP	WSP_03f_m67_002.xlsx_RoiSetAuto-17.zip Distance px	120	11756.1	0.796936	855.763	13.7376	855.763
WSP_03f_m67_002	WSP	WSP_03f_m67_002.xlsx_RoiSetAuto-18.zip Distance px	16	8995.34	0.242078	855.763	10.5115	855.763
WSP_03f_m67_002	WSP	WSP_03f_m67_002.xlsx_RoiSetAuto-19.zip Distance px	48	11195.7	0.684021	855.763	13.0828	855.763
WSP_03f_m67_002	WSP	WSP_03f_m67_002.xlsx_RoiSetAuto-2.zip Distance px	24	11067.8	0.459747	855.763	12.9332	855.763
WSP_03f_m67_002	WSP	WSP_03f_m67_002.xlsx_RoiSetAuto-20.zip Distance px	24	13313.2	0.484068	855.763	15.5571	855.763
WSP_03f_m67_002	WSP	WSP_03f_m67_002.xlsx_RoiSetAuto-21.zip Distance px	16	8396.4	0.393479	855.763	9.8116	855.763
WSP_03f_m67_002	WSP	WSP_03f_m67_002.xlsx_RoiSetAuto-22.zip Distance px	16	9791.62	0.251239	855.763	11.442	855.763
WSP_03f_m67_002	WSP	WSP_03f_m67_002.xlsx_RoiSetAuto-23.zip Distance px	16	9849.36	0.213903	855.763	11.5095	855.763
WSP_03f_m67_002	WSP	WSP_03f_m67_002.xlsx_RoiSetAuto-24.zip Distance px	32	12182.1	0.348735	855.763	14.2354	855.763
WSP_03f_m67_002	WSP	WSP_03f_m67_002.xlsx_RoiSetAuto-3.zip Distance px	36	8702.24	0.400798	855.763	10.169	855.763
WSP_03f_m67_002	WSP	WSP_03f_m67_002.xlsx_RoiSetAuto-4.zip Distance px	36	8583.01	0.417637	855.763	10.0297	855.763
WSP_03f_m67_002	WSP	WSP_03f_m67_002.xlsx_RoiSetAuto-5.zip Distance px	64	10573.5	0.397843	855.763	12.3556	855.763
WSP_03f_m67_002	WSP	WSP_03f_m67_002.xlsx_RoiSetAuto-6.zip Distance px	364	19733.4	0.889622	855.763	23.0594	855.763
WSP_03f_m67_002	WSP	WSP_03f_m67_002.xlsx_RoiSetAuto-7.zip Distance px	16	8391.17	0.769561	855.763	9.80549	855.763
WSP_03f_m67_002	WSP	WSP_03f_m67_002.xlsx_RoiSetAuto-8.zip Distance px	60	9902.81	0.965033	855.763	11.5719	855.763
WSP_03f_m67_002	WSP	WSP_03f_m67_002.xlsx_RoiSetAuto-9.zip Distance px	40	9997.07	0.7884	855.763	11.6821	855.763
WSP_03f_m67_003	WSP	WSP_03f_m67_003.xlsx_RoiSetAuto-1.zip Distance px	32	4818.58	0.70152	488.932	9.85532	488.932
WSP_03f_m67_003	WSP	WSP_03f_m67_003.xlsx_RoiSetAuto-12.zip Distance px	72	6048.73	0.838569	488.932	12.3713	488.932
WSP_03f_m67_003	WSP	WSP_03f_m67_003.xlsx_RoiSetAuto-14.zip Distance px	40	5533.06	0.514944	488.932	11.3166	488.932
WSP_03f_m67_003	WSP	WSP_03f_m67_003.xlsx_RoiSetAuto-19.zip Distance px	28	5239.8	1.02332	488.932	10.7168	488.932
WSP_03f_m67_003	WSP	WSP_03f_m67_003.xlsx_RoiSetAuto-20.zip Distance px	24	4976.65	0.414585	488.932	10.1786	488.932
WSP_03f_m67_003	WSP	WSP_03f_m67_003.xlsx_RoiSetAuto-23.zip Distance px	144	6313.03	0.880977	488.932	12.9119	488.932
WSP_03f_m67_003	WSP	WSP_03f_m67_003.xlsx_RoiSetAuto-25.zip Distance px	80	11254.7	0.76803	488.932	23.0189	488.932
WSP_03f_m67_003	WSP	WSP_03f_m67_003.xlsx_RoiSetAuto-35.zip Distance px	32	8689.19	0.337297	488.932	17.7718	488.932
WSP_03f_m67_003	WSP	WSP_03f_m67_003.xlsx_RoiSetAuto-36.zip Distance px	44	6631.21	0.951715	488.932	13.5626	488.932
WSP_03f_m67_003	WSP	WSP_03f_m67_003.xlsx_RoiSetAuto-37.zip Distance px	20	7690.66	0.555404	488.932	15.7295	488.932
WSP_03f_m67_003	WSP	WSP_03f_m67_003.xlsx_RoiSetAuto-39.zip Distance px	28	6310.07	0.573422	488.932	12.9058	488.932
WSP_03f_m67_003	WSP	WSP_03f_m67_003.xlsx_RoiSetAuto-43.zip Distance px	28	7708.98	0.407444	488.932	15.767	488.932
WSP_03f_m67_003	WSP	WSP_03f_m67_003.xlsx_RoiSetAuto-5.zip Distance px	208	12538.9	1.17713	488.932	25.6455	488.932
WSP_03f_m67_003	WSP	WSP_03f_m67_003.xlsx_RoiSetAuto-52.zip Distance px	44	8565.35	0.887997	488.932	17.5185	488.932
WSP_03f_m67_003	WSP	WSP_03f_m67_003.xlsx_RoiSetAuto-54.zip Distance px	24	8080.8	0.725202	488.932	16.5274	488.932
WSP_03f_m67_003	WSP	WSP_03f_m67_003.xlsx_RoiSetAuto-6.zip Distance px	60	12925.8	0.549282	488.932	26.4369	488.932
WSP_03f_m67_003	WSP	WSP_03f_m67_003.xlsx_RoiSetAuto-9.zip Distance px	68	7332.87	0.661048	488.932	14.9977	488.932
WSP_04f_m67_001	WSP	WSP_04f_m67_001.xlsx_RoiSetAuto-12.zip Distance px	52	15519	0.56015	1166.22	13.307	1166.22
WSP_04f_m67_001	WSP	WSP_04f_m67_001.xlsx_RoiSetAuto-14.zip Distance px	112	16427.2	0.703371	1166.22	14.0858	1166.22
WSP_04f_m67_001	WSP	WSP_04f_m67_001.xlsx_RoiSetAuto-16.zip Distance px	180	16995.9	0.896654	1166.22	14.5735	1166.22
WSP_04f_m67_001	WSP	WSP_04f_m67_001.xlsx_RoiSetAuto-18.zip Distance px	48	17498	0.806957	1166.22	15.004	1166.22
WSP_04f_m67_001	WSP	WSP_04f_m67_001.xlsx_RoiSetAuto-2.zip Distance px	96	18861.4	0.779239	1166.22	16.1731	1166.22
WSP_04f_m67_001	WSP	WSP_04f_m67_001.xlsx_RoiSetAuto-20.zip Distance px	20	11104.9	0.447501	1166.22	9.52209	1166.22
WSP_04f_m67_001	WSP	WSP_04f_m67_001.xlsx_RoiSetAuto-21.zip Distance px	72	15916.8	0.840901	1166.22	13.6482	1166.22
WSP_04f_m67_001	WSP	WSP_04f_m67_001.xlsx_RoiSetAuto-22.zip Distance px	68	14026.9	0.779963	1166.22	12.0276	1166.22
WSP_04f_m67_001	WSP	WSP_04f_m67_001.xlsx_RoiSetAuto-24.zip Distance px	32	12104.1	0.811224	1166.22	10.3788	1166.22
WSP_04f_m67_001	WSP	WSP_04f_m67_001.xlsx_RoiSetAuto-25.zip Distance px	108	13774.4	0.692118	1166.22	11.8111	1166.22
WSP_04f_m67_001	WSP	WSP_04f_m67_001.xlsx_RoiSetAuto-26.zip Distance px	24	10956.3	0.260726	1166.22	9.39468	1166.22
WSP_04f_m67_001	WSP	WSP_04f_m67_001.xlsx_RoiSetAuto-27.zip Distance px	40	13048.8	0.452039	1166.22	11.189	1166.22
WSP_04f_m67_001	WSP	WSP_04f_m67_001.xlsx_RoiSetAuto-28.zip Distance px	148	19480.6	0.729094	1166.22	16.704	1166.22
WSP_04f_m67_001	WSP	WSP_04f_m67_001.xlsx_RoiSetAuto-3.zip Distance px	84	15475.5	0.722528	1166.22	13.2698	1166.22
WSP_04f_m67_001	WSP	WSP_04f_m67_001.xlsx_RoiSetAuto-35.zip Distance px	28	13708.3	0.451905	1166.22	11.7545	1166.22
WSP_04f_m67_001	WSP	WSP_04f_m67_001.xlsx_RoiSetAuto-4.zip Distance px	344	25893.2	1.33756	1166.22	22.2026	1166.22
WSP_04f_m67_001	WSP	WSP_04f_m67_001.xlsx_RoiSetAuto-41.zip Distance px	16	12780.2	0.603107	1166.22	10.9586	1166.22
WSP_04f_m67_001	WSP	WSP_04f_m67_001.xlsx_RoiSetAuto-42.zip Distance px	64	13327.2	0.708337	1166.22	11.4277	1166.22
WSP_04f_m67_001	WSP	WSP_04f_m67_001.xlsx_RoiSetAuto-5.zip Distance px	56	16874.5	0.841183	1166.22	14.4693	1166.22
WSP_04f_m67_001	WSP	WSP_04f_m67_001.xlsx_RoiSetAuto-6.zip Distance px	256	26939.2	1.20155	1166.22	23.0995	1166.22
WSP_04f_m67_001	WSP	WSP_04f_m67_001.xlsx_RoiSetAuto-7.zip Distance px	132	24654.4	1.09821	1166.22	21.1404	1166.22
WSP_04f_m67_001	WSP	WSP_04f_m67_001.xlsx_RoiSetAuto-8.zip Distance px	216	25666.9	1.06603	1166.22	22.0086	1166.22
WSP_04f_m67_002	WSP	WSP_04f_m67_002.xlsx_RoiSetAuto-1.zip Distance px	60	14388.2	0.621029	838.627	17.1568	838.627
WSP_04f_m67_002	WSP	WSP_04f_m67_002.xlsx_RoiSetAuto-10.zip Distance px	16	10299.4	0.152653	838.627	12.2813	838.627
WSP_04f_m67_002	WSP	WSP_04f_m67_002.xlsx_RoiSetAuto-2.zip Distance px	32	9728.88	0.366654	838.627	11.601	838.627
WSP_04f_m67_002	WSP	WSP_04f_m67_002.xlsx_RoiSetAuto-7.zip Distance px	28	9232.91	0.640352	838.627	11.0096	838.627
WSP_04f_m67_002	WSP	WSP_04f_m67_002.xlsx_RoiSetAuto-8.zip Distance px	16	9197.68	0.0724874	838.627	10.9675	838.627
WSP_04f_m67_003	WSP	WSP_04f_m67_003.xlsx_RoiSetAuto-1.zip Distance px	48	10983.9	0.409504	992.863	11.0629	992.863
WSP_04f_m67_003	WSP	WSP_04f_m67_003.xlsx_RoiSetAuto-10.zip Distance px	32	10261	0.539095	992.863	10.3347	992.863
WSP_04f_m67_003	WSP	WSP_04f_m67_003.xlsx_RoiSetAuto-11.zip Distance px	16	9543.79	0.190391	992.863	9.61239	992.863
WSP_04f_m67_003	WSP	WSP_04f_m67_003.xlsx_RoiSetAuto-13.zip Distance px	32	11728.7	0.382543	992.863	11.813	992.863
WSP_04f_m67_003	WSP	WSP_04f_m67_003.xlsx_RoiSetAuto-14.zip Distance px	64	17238.4	0.751251	992.863	17.3623	992.863
WSP_04f_m67_003	WSP	WSP_04f_m67_003.xlsx_RoiSetAuto-15.zip Distance px	36	11952.9	0.399241	992.863	12.0388	992.863
WSP_04f_m67_003	WSP	WSP_04f_m67_003.xlsx_RoiSetAuto-17.zip Distance px	24	11216.7	0.303374	992.863	11.2974	992.863
WSP_04f_m67_003	WSP	WSP_04f_m67_003.xlsx_RoiSetAuto-18.zip Distance px	28	12801.5	0.415154	992.863	12.8935	992.863
WSP_04f_m67_003	WSP	WSP_04f_m67_003.xlsx_RoiSetAuto-19.zip Distance px	28	10144.4	0.255886	992.863	10.2173	992.863
WSP_04f_m67_003	WSP	WSP_04f_m67_003.xlsx_RoiSetAuto-2.zip Distance px	76	13549.2	0.780095	992.863	13.6466	992.863
WSP_04f_m67_003	WSP	WSP_04f_m67_003.xlsx_RoiSetAuto-20.zip Distance px	16	13169.3	0.932093	992.863	13.2639	992.863
WSP_04f_m67_003	WSP	WSP_04f_m67_003.xlsx_RoiSetAuto-21.zip Distance px	24	12580.6	0.202645	992.863	12.671	992.863
WSP_04f_m67_003	WSP	WSP_04f_m67_003.xlsx_RoiSetAuto-23.zip Distance px	48	13900.3	0.394817	992.863	14.0003	992.863
WSP_04f_m67_003	WSP	WSP_04f_m67_003.xlsx_RoiSetAuto-24.zip Distance px	28	13980.9	0.444937	992.863	14.0814	992.863
WSP_04f_m67_003	WSP	WSP_04f_m67_003.xlsx_RoiSetAuto-25.zip Distance px	36	12838.5	0.627868	992.863	12.9308	992.863
WSP_04f_m67_003	WSP	WSP_04f_m67_003.xlsx_RoiSetAuto-27.zip Distance px	16	13258.7	0.418111	992.863	13.354	992.863
WSP_04f_m67_003	WSP	WSP_04f_m67_003.xlsx_RoiSetAuto-28.zip Distance px	20	12859.8	0.239706	992.863	12.9523	992.863
WSP_04f_m67_003	WSP	WSP_04f_m67_003.xlsx_RoiSetAuto-29.zip Distance px	16	12431.4	0.157558	992.863	12.5208	992.863
WSP_04f_m67_003	WSP	WSP_04f_m67_003.xlsx_RoiSetAuto-3.zip Distance px	96	13925.1	0.608356	992.863	14.0252	992.863
WSP_04f_m67_003	WSP	WSP_04f_m67_003.xlsx_RoiSetAuto-30.zip Distance px	20	13188.3	0.69695	992.863	13.2831	992.863
WSP_04f_m67_003	WSP	WSP_04f_m67_003.xlsx_RoiSetAuto-4.zip Distance px	20	10418.8	0.33418	992.863	10.4937	992.863
WSP_04f_m67_003	WSP	WSP_04f_m67_003.xlsx_RoiSetAuto-5.zip Distance px	24	10069.4	0.52308	992.863	10.1417	992.863
WSP_04f_m67_003	WSP	WSP_04f_m67_003.xlsx_RoiSetAuto-6.zip Distance px	84	11033.5	0.674499	992.863	11.1128	992.863
WSP_04f_m67_003	WSP	WSP_04f_m67_003.xlsx_RoiSetAuto-7.zip Distance px	24	9685.81	0.272519	992.863	9.75543	992.863
WSP_04f_m67_003	WSP	WSP_04f_m67_003.xlsx_RoiSetAuto-8.zip Distance px	100	11967.7	0.600123	992.863	12.0538	992.863
WSP_04f_m67_003	WSP	WSP_04f_m67_003.xlsx_RoiSetAuto-9.zip Distance px	76	11565	0.991208	992.863	11.6482	992.863
WSP_05f_m67_001	WSP	WSP_05f_m67_001.xlsx_RoiSetAuto-1.zip Distance px	48	6203.65	0.880966	521.919	11.8862	521.919
WSP_05f_m67_001	WSP	WSP_05f_m67_001.xlsx_RoiSetAuto-10.zip Distance px	40	5251.35	0.406592	521.919	10.0616	521.919
WSP_05f_m67_001	WSP	WSP_05f_m67_001.xlsx_RoiSetAuto-11.zip Distance px	20	5625.81	0.452682	521.919	10.7791	521.919
WSP_05f_m67_001	WSP	WSP_05f_m67_001.xlsx_RoiSetAuto-12.zip Distance px	84	6299.1	0.883534	521.919	12.0691	521.919
WSP_05f_m67_001	WSP	WSP_05f_m67_001.xlsx_RoiSetAuto-13.zip Distance px	48	6446.01	0.690701	521.919	12.3506	521.919
WSP_05f_m67_001	WSP	WSP_05f_m67_001.xlsx_RoiSetAuto-16.zip Distance px	20	5608.85	0.654941	521.919	10.7466	521.919
WSP_05f_m67_001	WSP	WSP_05f_m67_001.xlsx_RoiSetAuto-17.zip Distance px	32	4665.81	0.439005	521.919	8.93973	521.919
WSP_05f_m67_001	WSP	WSP_05f_m67_001.xlsx_RoiSetAuto-18.zip Distance px	28	6231.93	0.615483	521.919	11.9404	521.919
WSP_05f_m67_001	WSP	WSP_05f_m67_001.xlsx_RoiSetAuto-19.zip Distance px	68	6613.38	1.00362	521.919	12.6713	521.919
WSP_05f_m67_001	WSP	WSP_05f_m67_001.xlsx_RoiSetAuto-2.zip Distance px	224	22715.9	0.938598	521.919	43.5238	521.919
WSP_05f_m67_001	WSP	WSP_05f_m67_001.xlsx_RoiSetAuto-20.zip Distance px	32	4787.13	0.65613	521.919	9.17217	521.919
WSP_05f_m67_001	WSP	WSP_05f_m67_001.xlsx_RoiSetAuto-21.zip Distance px	16	4732.75	0.541606	521.919	9.06798	521.919
WSP_05f_m67_001	WSP	WSP_05f_m67_001.xlsx_RoiSetAuto-22.zip Distance px	56	5569.03	0.894192	521.919	10.6703	521.919
WSP_05f_m67_001	WSP	WSP_05f_m67_001.xlsx_RoiSetAuto-23.zip Distance px	164	7352.1	0.874844	521.919	14.0867	521.919
WSP_05f_m67_001	WSP	WSP_05f_m67_001.xlsx_RoiSetAuto-24.zip Distance px	16	4876.15	0.408734	521.919	9.34273	521.919
WSP_05f_m67_001	WSP	WSP_05f_m67_001.xlsx_RoiSetAuto-25.zip Distance px	16	6473.23	0.676503	521.919	12.4028	521.919
WSP_05f_m67_001	WSP	WSP_05f_m67_001.xlsx_RoiSetAuto-26.zip Distance px	20	5510.11	0.396147	521.919	10.5574	521.919
WSP_05f_m67_001	WSP	WSP_05f_m67_001.xlsx_RoiSetAuto-27.zip Distance px	20	7013.81	0.44836	521.919	13.4385	521.919
WSP_05f_m67_001	WSP	WSP_05f_m67_001.xlsx_RoiSetAuto-29.zip Distance px	36	6363.4	0.323816	521.919	12.1923	521.919
WSP_05f_m67_001	WSP	WSP_05f_m67_001.xlsx_RoiSetAuto-3.zip Distance px	56	6044.76	0.555028	521.919	11.5818	521.919
WSP_05f_m67_001	WSP	WSP_05f_m67_001.xlsx_RoiSetAuto-30.zip Distance px	16	4732.23	0.279935	521.919	9.067	521.919
WSP_05f_m67_001	WSP	WSP_05f_m67_001.xlsx_RoiSetAuto-32.zip Distance px	16	6923.15	0.677385	521.919	13.2648	521.919
WSP_05f_m67_001	WSP	WSP_05f_m67_001.xlsx_RoiSetAuto-33.zip Distance px	16	4425.86	0.708932	521.919	8.47997	521.919
WSP_05f_m67_001	WSP	WSP_05f_m67_001.xlsx_RoiSetAuto-34.zip Distance px	60	6355.29	1.00813	521.919	12.1768	521.919
WSP_05f_m67_001	WSP	WSP_05f_m67_001.xlsx_RoiSetAuto-35.zip Distance px	20	4980.34	0.362557	521.919	9.54237	521.919
WSP_05f_m67_001	WSP	WSP_05f_m67_001.xlsx_RoiSetAuto-36.zip Distance px	36	5539.57	0.551666	521.919	10.6139	521.919
WSP_05f_m67_001	WSP	WSP_05f_m67_001.xlsx_RoiSetAuto-37.zip Distance px	24	5107.13	0.59872	521.919	9.78529	521.919
WSP_05f_m67_001	WSP	WSP_05f_m67_001.xlsx_RoiSetAuto-38.zip Distance px	56	4959.95	0.673093	521.919	9.50331	521.919
WSP_05f_m67_001	WSP	WSP_05f_m67_001.xlsx_RoiSetAuto-39.zip Distance px	16	5630.7	0.362148	521.919	10.7885	521.919
WSP_05f_m67_001	WSP	WSP_05f_m67_001.xlsx_RoiSetAuto-40.zip Distance px	28	6046.07	0.871521	521.919	11.5843	521.919
WSP_05f_m67_001	WSP	WSP_05f_m67_001.xlsx_RoiSetAuto-41.zip Distance px	16	6079.23	0.231295	521.919	11.6478	521.919
WSP_05f_m67_001	WSP	WSP_05f_m67_001.xlsx_RoiSetAuto-42.zip Distance px	20	5252.28	0.415524	521.919	10.0634	521.919
WSP_05f_m67_001	WSP	WSP_05f_m67_001.xlsx_RoiSetAuto-43.zip Distance px	88	17541.3	0.634943	521.919	33.6092	521.919
WSP_05f_m67_001	WSP	WSP_05f_m67_001.xlsx_RoiSetAuto-44.zip Distance px	28	6812.4	0.921712	521.919	13.0526	521.919
WSP_05f_m67_001	WSP	WSP_05f_m67_001.xlsx_RoiSetAuto-45.zip Distance px	36	6197.58	0.585863	521.919	11.8746	521.919
WSP_05f_m67_001	WSP	WSP_05f_m67_001.xlsx_RoiSetAuto-46.zip Distance px	16	5636.6	0.197563	521.919	10.7998	521.919
WSP_05f_m67_001	WSP	WSP_05f_m67_001.xlsx_RoiSetAuto-47.zip Distance px	20	4655.09	0.352124	521.919	8.91919	521.919
WSP_05f_m67_001	WSP	WSP_05f_m67_001.xlsx_RoiSetAuto-48.zip Distance px	36	7769.77	0.782747	521.919	14.8869	521.919
WSP_05f_m67_001	WSP	WSP_05f_m67_001.xlsx_RoiSetAuto-49.zip Distance px	24	7011.95	0.512776	521.919	13.4349	521.919
WSP_05f_m67_001	WSP	WSP_05f_m67_001.xlsx_RoiSetAuto-5.zip Distance px	100	7961.74	1.06786	521.919	15.2547	521.919
WSP_05f_m67_001	WSP	WSP_05f_m67_001.xlsx_RoiSetAuto-50.zip Distance px	16	5126.44	0.246733	521.919	9.82229	521.919
WSP_05f_m67_001	WSP	WSP_05f_m67_001.xlsx_RoiSetAuto-51.zip Distance px	24	5458.86	0.334631	521.919	10.4592	521.919
WSP_05f_m67_001	WSP	WSP_05f_m67_001.xlsx_RoiSetAuto-52.zip Distance px	32	5377.81	0.387647	521.919	10.3039	521.919
WSP_05f_m67_001	WSP	WSP_05f_m67_001.xlsx_RoiSetAuto-54.zip Distance px	28	8452.22	0.809377	521.919	16.1945	521.919
WSP_05f_m67_001	WSP	WSP_05f_m67_001.xlsx_RoiSetAuto-55.zip Distance px	28	5368.52	0.420654	521.919	10.2861	521.919
WSP_05f_m67_001	WSP	WSP_05f_m67_001.xlsx_RoiSetAuto-56.zip Distance px	16	6087.58	0.972008	521.919	11.6638	521.919
WSP_05f_m67_001	WSP	WSP_05f_m67_001.xlsx_RoiSetAuto-57.zip Distance px	16	6599.81	0.485148	521.919	12.6453	521.919
WSP_05f_m67_001	WSP	WSP_05f_m67_001.xlsx_RoiSetAuto-6.zip Distance px	20	4595.41	0.311128	521.919	8.80483	521.919
WSP_05f_m67_001	WSP	WSP_05f_m67_001.xlsx_RoiSetAuto-8.zip Distance px	32	6788.94	0.341879	521.919	13.0077	521.919
WSP_05f_m67_001	WSP	WSP_05f_m67_001.xlsx_RoiSetAuto-9.zip Distance px	152	12029.5	1.26801	521.919	23.0486	521.919
WSP_05f_m67_002	WSP	WSP_05f_m67_002.xlsx_RoiSetAuto-10.zip Distance px	56	16558.7	0.628288	1433.42	11.5519	1433.42
WSP_05f_m67_002	WSP	WSP_05f_m67_002.xlsx_RoiSetAuto-11.zip Distance px	124	18475.5	0.925847	1433.42	12.8891	1433.42
WSP_05f_m67_002	WSP	WSP_05f_m67_002.xlsx_RoiSetAuto-13.zip Distance px	68	15736.7	0.919581	1433.42	10.9784	1433.42
WSP_05f_m67_002	WSP	WSP_05f_m67_002.xlsx_RoiSetAuto-14.zip Distance px	24	12887.8	0.330234	1433.42	8.99096	1433.42
WSP_05f_m67_002	WSP	WSP_05f_m67_002.xlsx_RoiSetAuto-15.zip Distance px	20	13103.8	0.183261	1433.42	9.14163	1433.42
WSP_05f_m67_002	WSP	WSP_05f_m67_002.xlsx_RoiSetAuto-16.zip Distance px	60	16726.6	0.496839	1433.42	11.669	1433.42
WSP_05f_m67_002	WSP	WSP_05f_m67_002.xlsx_RoiSetAuto-18.zip Distance px	16	13277.8	0.123852	1433.42	9.263	1433.42
WSP_05f_m67_002	WSP	WSP_05f_m67_002.xlsx_RoiSetAuto-19.zip Distance px	52	15984.3	0.562658	1433.42	11.1512	1433.42
WSP_05f_m67_002	WSP	WSP_05f_m67_002.xlsx_RoiSetAuto-2.zip Distance px	184	22295.1	0.883161	1433.42	15.5538	1433.42
WSP_05f_m67_002	WSP	WSP_05f_m67_002.xlsx_RoiSetAuto-20.zip Distance px	48	16919.7	0.576299	1433.42	11.8037	1433.42
WSP_05f_m67_002	WSP	WSP_05f_m67_002.xlsx_RoiSetAuto-3.zip Distance px	116	23886.5	0.817593	1433.42	16.664	1433.42
WSP_05f_m67_002	WSP	WSP_05f_m67_002.xlsx_RoiSetAuto-5.zip Distance px	20	12503.5	0.59869	1433.42	8.72286	1433.42
WSP_05f_m67_002	WSP	WSP_05f_m67_002.xlsx_RoiSetAuto-6.zip Distance px	28	13459.2	0.644245	1433.42	9.38959	1433.42
WSP_05f_m67_002	WSP	WSP_05f_m67_002.xlsx_RoiSetAuto-7.zip Distance px	36	10118.5	0.62573	1433.42	7.05903	1433.42
WSP_05f_m67_002	WSP	WSP_05f_m67_002.xlsx_RoiSetAuto-9.zip Distance px	16	13716.8	0.149943	1433.42	9.56932	1433.42
WSP_06f_m67_001	WSP	WSP_06f_m67_001.xlsx_RoiSetAuto-1.zip Distance px	124	9348.02	1.06433	618.755	15.1078	618.755
WSP_06f_m67_001	WSP	WSP_06f_m67_001.xlsx_RoiSetAuto-10.zip Distance px	364	20683.2	0.966164	618.755	33.4271	618.755
WSP_06f_m67_001	WSP	WSP_06f_m67_001.xlsx_RoiSetAuto-11.zip Distance px	20	7713.6	0.784345	618.755	12.4663	618.755
WSP_06f_m67_001	WSP	WSP_06f_m67_001.xlsx_RoiSetAuto-12.zip Distance px	28	8058.42	0.592423	618.755	13.0236	618.755
WSP_06f_m67_001	WSP	WSP_06f_m67_001.xlsx_RoiSetAuto-13.zip Distance px	28	6648.28	0.551434	618.755	10.7446	618.755
WSP_06f_m67_001	WSP	WSP_06f_m67_001.xlsx_RoiSetAuto-14.zip Distance px	20	5278.84	0.28239	618.755	8.53138	618.755
WSP_06f_m67_001	WSP	WSP_06f_m67_001.xlsx_RoiSetAuto-15.zip Distance px	60	8476.11	1.02001	618.755	13.6986	618.755
WSP_06f_m67_001	WSP	WSP_06f_m67_001.xlsx_RoiSetAuto-16.zip Distance px	56	9431.4	0.528435	618.755	15.2425	618.755
WSP_06f_m67_001	WSP	WSP_06f_m67_001.xlsx_RoiSetAuto-17.zip Distance px	20	6812.22	0.313688	618.755	11.0096	618.755
WSP_06f_m67_001	WSP	WSP_06f_m67_001.xlsx_RoiSetAuto-18.zip Distance px	24	6005.68	0.827708	618.755	9.70607	618.755
WSP_06f_m67_001	WSP	WSP_06f_m67_001.xlsx_RoiSetAuto-19.zip Distance px	56	7604.97	0.553588	618.755	12.2908	618.755
WSP_06f_m67_001	WSP	WSP_06f_m67_001.xlsx_RoiSetAuto-2.zip Distance px	20	6713.92	0.659072	618.755	10.8507	618.755
WSP_06f_m67_001	WSP	WSP_06f_m67_001.xlsx_RoiSetAuto-20.zip Distance px	16	5976.89	0.505662	618.755	9.65954	618.755
WSP_06f_m67_001	WSP	WSP_06f_m67_001.xlsx_RoiSetAuto-21.zip Distance px	16	7947.54	0.596286	618.755	12.8444	618.755
WSP_06f_m67_001	WSP	WSP_06f_m67_001.xlsx_RoiSetAuto-22.zip Distance px	48	12976.9	0.615616	618.755	20.9726	618.755
WSP_06f_m67_001	WSP	WSP_06f_m67_001.xlsx_RoiSetAuto-23.zip Distance px	56	7487.68	0.602189	618.755	12.1012	618.755
WSP_06f_m67_001	WSP	WSP_06f_m67_001.xlsx_RoiSetAuto-24.zip Distance px	32	6271.16	0.468782	618.755	10.1351	618.755
WSP_06f_m67_001	WSP	WSP_06f_m67_001.xlsx_RoiSetAuto-25.zip Distance px	48	7563.27	0.688469	618.755	12.2234	618.755
WSP_06f_m67_001	WSP	WSP_06f_m67_001.xlsx_RoiSetAuto-26.zip Distance px	20	8161.84	0.210561	618.755	13.1907	618.755
WSP_06f_m67_001	WSP	WSP_06f_m67_001.xlsx_RoiSetAuto-27.zip Distance px	20	6017.81	0.232516	618.755	9.72567	618.755
WSP_06f_m67_001	WSP	WSP_06f_m67_001.xlsx_RoiSetAuto-28.zip Distance px	28	7085.24	0.607159	618.755	11.4508	618.755
WSP_06f_m67_001	WSP	WSP_06f_m67_001.xlsx_RoiSetAuto-29.zip Distance px	16	5272.78	0.581897	618.755	8.5216	618.755
WSP_06f_m67_001	WSP	WSP_06f_m67_001.xlsx_RoiSetAuto-30.zip Distance px	16	4888.63	0.204093	618.755	7.90075	618.755
WSP_06f_m67_001	WSP	WSP_06f_m67_001.xlsx_RoiSetAuto-31.zip Distance px	48	8778.3	0.834169	618.755	14.187	618.755
WSP_06f_m67_001	WSP	WSP_06f_m67_001.xlsx_RoiSetAuto-32.zip Distance px	64	9031.92	0.887911	618.755	14.5969	618.755
WSP_06f_m67_001	WSP	WSP_06f_m67_001.xlsx_RoiSetAuto-33.zip Distance px	16	5603.6	0.247939	618.755	9.05624	618.755
WSP_06f_m67_001	WSP	WSP_06f_m67_001.xlsx_RoiSetAuto-34.zip Distance px	44	7685.36	0.540424	618.755	12.4207	618.755
WSP_06f_m67_001	WSP	WSP_06f_m67_001.xlsx_RoiSetAuto-35.zip Distance px	36	6014.71	0.568003	618.755	9.72066	618.755
WSP_06f_m67_001	WSP	WSP_06f_m67_001.xlsx_RoiSetAuto-36.zip Distance px	28	6257.21	0.543027	618.755	10.1126	618.755
WSP_06f_m67_001	WSP	WSP_06f_m67_001.xlsx_RoiSetAuto-37.zip Distance px	16	6716.57	0.130828	618.755	10.855	618.755
WSP_06f_m67_001	WSP	WSP_06f_m67_001.xlsx_RoiSetAuto-38.zip Distance px	16	6123.87	0.341221	618.755	9.89708	618.755
WSP_06f_m67_001	WSP	WSP_06f_m67_001.xlsx_RoiSetAuto-39.zip Distance px	28	6424.1	0.558297	618.755	10.3823	618.755
WSP_06f_m67_001	WSP	WSP_06f_m67_001.xlsx_RoiSetAuto-4.zip Distance px	336	14952.1	1.23339	618.755	24.1648	618.755
WSP_06f_m67_001	WSP	WSP_06f_m67_001.xlsx_RoiSetAuto-40.zip Distance px	96	10625	0.946786	618.755	17.1715	618.755
WSP_06f_m67_001	WSP	WSP_06f_m67_001.xlsx_RoiSetAuto-41.zip Distance px	16	7624.5	0.411941	618.755	12.3223	618.755
WSP_06f_m67_001	WSP	WSP_06f_m67_001.xlsx_RoiSetAuto-42.zip Distance px	212	10789.9	1.10261	618.755	17.4381	618.755
WSP_06f_m67_001	WSP	WSP_06f_m67_001.xlsx_RoiSetAuto-43.zip Distance px	28	7725.44	0.828078	618.755	12.4855	618.755
WSP_06f_m67_001	WSP	WSP_06f_m67_001.xlsx_RoiSetAuto-44.zip Distance px	104	10337.6	1.03723	618.755	16.7071	618.755
WSP_06f_m67_001	WSP	WSP_06f_m67_001.xlsx_RoiSetAuto-45.zip Distance px	176	12350.8	1.19667	618.755	19.9607	618.755
WSP_06f_m67_001	WSP	WSP_06f_m67_001.xlsx_RoiSetAuto-46.zip Distance px	116	10482.3	1.0079	618.755	16.9409	618.755
WSP_06f_m67_001	WSP	WSP_06f_m67_001.xlsx_RoiSetAuto-47.zip Distance px	32	6785.47	0.683815	618.755	10.9663	618.755
WSP_06f_m67_001	WSP	WSP_06f_m67_001.xlsx_RoiSetAuto-48.zip Distance px	24	6322.45	0.415245	618.755	10.218	618.755
WSP_06f_m67_001	WSP	WSP_06f_m67_001.xlsx_RoiSetAuto-49.zip Distance px	76	10466.6	0.651807	618.755	16.9156	618.755
WSP_06f_m67_001	WSP	WSP_06f_m67_001.xlsx_RoiSetAuto-5.zip Distance px	236	13788.4	1.67013	618.755	22.2841	618.755
WSP_06f_m67_001	WSP	WSP_06f_m67_001.xlsx_RoiSetAuto-50.zip Distance px	96	8584.66	0.680495	618.755	13.8741	618.755
WSP_06f_m67_001	WSP	WSP_06f_m67_001.xlsx_RoiSetAuto-51.zip Distance px	24	8519.85	0.437251	618.755	13.7693	618.755
WSP_06f_m67_001	WSP	WSP_06f_m67_001.xlsx_RoiSetAuto-52.zip Distance px	16	7852.61	0.143479	618.755	12.691	618.755
WSP_06f_m67_001	WSP	WSP_06f_m67_001.xlsx_RoiSetAuto-53.zip Distance px	36	6650.4	0.689845	618.755	10.748	618.755
WSP_06f_m67_001	WSP	WSP_06f_m67_001.xlsx_RoiSetAuto-54.zip Distance px	48	7473.01	0.985574	618.755	12.0775	618.755
WSP_06f_m67_001	WSP	WSP_06f_m67_001.xlsx_RoiSetAuto-55.zip Distance px	64	10679.4	0.836243	618.755	17.2594	618.755
WSP_06f_m67_001	WSP	WSP_06f_m67_001.xlsx_RoiSetAuto-56.zip Distance px	16	7517.91	0.44155	618.755	12.1501	618.755
WSP_06f_m67_001	WSP	WSP_06f_m67_001.xlsx_RoiSetAuto-57.zip Distance px	24	8644.49	0.669786	618.755	13.9708	618.755
WSP_06f_m67_001	WSP	WSP_06f_m67_001.xlsx_RoiSetAuto-58.zip Distance px	24	8269.36	0.28363	618.755	13.3645	618.755
WSP_06f_m67_001	WSP	WSP_06f_m67_001.xlsx_RoiSetAuto-59.zip Distance px	20	9339.53	0.453859	618.755	15.0941	618.755
WSP_06f_m67_001	WSP	WSP_06f_m67_001.xlsx_RoiSetAuto-6.zip Distance px	124	15251.4	0.901529	618.755	24.6486	618.755
WSP_06f_m67_001	WSP	WSP_06f_m67_001.xlsx_RoiSetAuto-60.zip Distance px	16	7731.01	0.420084	618.755	12.4945	618.755
WSP_06f_m67_001	WSP	WSP_06f_m67_001.xlsx_RoiSetAuto-7.zip Distance px	148	11087.1	1.19045	618.755	17.9184	618.755
WSP_06f_m67_001	WSP	WSP_06f_m67_001.xlsx_RoiSetAuto-8.zip Distance px	116	10241.3	0.922307	618.755	16.5514	618.755
WSP_06f_m67_001	WSP	WSP_06f_m67_001.xlsx_RoiSetAuto-9.zip Distance px	52	9469.83	0.669367	618.755	15.3046	618.755
WSP_06f_m67_002	WSP	WSP_06f_m67_002.xlsx_RoiSetAuto-10.zip Distance px	24	6864.99	0.250288	487.143	14.0924	487.143
WSP_06f_m67_002	WSP	WSP_06f_m67_002.xlsx_RoiSetAuto-100.zip Distance px	16	4548.5	0.363699	487.143	9.3371	487.143
WSP_06f_m67_002	WSP	WSP_06f_m67_002.xlsx_RoiSetAuto-101.zip Distance px	24	5676.52	0.475729	487.143	11.6527	487.143
WSP_06f_m67_002	WSP	WSP_06f_m67_002.xlsx_RoiSetAuto-102.zip Distance px	44	7609.29	0.562511	487.143	15.6203	487.143
WSP_06f_m67_002	WSP	WSP_06f_m67_002.xlsx_RoiSetAuto-103.zip Distance px	40	6185.07	0.372009	487.143	12.6966	487.143
WSP_06f_m67_002	WSP	WSP_06f_m67_002.xlsx_RoiSetAuto-104.zip Distance px	24	5899.17	0.52117	487.143	12.1097	487.143
WSP_06f_m67_002	WSP	WSP_06f_m67_002.xlsx_RoiSetAuto-105.zip Distance px	32	7587.24	0.686428	487.143	15.575	487.143
WSP_06f_m67_002	WSP	WSP_06f_m67_002.xlsx_RoiSetAuto-106.zip Distance px	28	6279.62	0.525696	487.143	12.8907	487.143
WSP_06f_m67_002	WSP	WSP_06f_m67_002.xlsx_RoiSetAuto-107.zip Distance px	16	6255.52	0.25883	487.143	12.8412	487.143
WSP_06f_m67_002	WSP	WSP_06f_m67_002.xlsx_RoiSetAuto-11.zip Distance px	120	9002.99	0.861167	487.143	18.4812	487.143
WSP_06f_m67_002	WSP	WSP_06f_m67_002.xlsx_RoiSetAuto-12.zip Distance px	32	4934.98	0.929182	487.143	10.1305	487.143
WSP_06f_m67_002	WSP	WSP_06f_m67_002.xlsx_RoiSetAuto-13.zip Distance px	296	11910.9	1.29459	487.143	24.4505	487.143
WSP_06f_m67_002	WSP	WSP_06f_m67_002.xlsx_RoiSetAuto-14.zip Distance px	16	4311.52	0.430252	487.143	8.85062	487.143
WSP_06f_m67_002	WSP	WSP_06f_m67_002.xlsx_RoiSetAuto-15.zip Distance px	16	4396.5	0.452762	487.143	9.02508	487.143
WSP_06f_m67_002	WSP	WSP_06f_m67_002.xlsx_RoiSetAuto-16.zip Distance px	32	6285.42	0.504297	487.143	12.9026	487.143
WSP_06f_m67_002	WSP	WSP_06f_m67_002.xlsx_RoiSetAuto-17.zip Distance px	76	6055.64	0.959895	487.143	12.4309	487.143
WSP_06f_m67_002	WSP	WSP_06f_m67_002.xlsx_RoiSetAuto-18.zip Distance px	64	5147.12	0.789684	487.143	10.5659	487.143
WSP_06f_m67_002	WSP	WSP_06f_m67_002.xlsx_RoiSetAuto-19.zip Distance px	72	6476.75	0.753644	487.143	13.2954	487.143
WSP_06f_m67_002	WSP	WSP_06f_m67_002.xlsx_RoiSetAuto-2.zip Distance px	60	6498.41	0.652899	487.143	13.3398	487.143
WSP_06f_m67_002	WSP	WSP_06f_m67_002.xlsx_RoiSetAuto-21.zip Distance px	52	5083.52	0.629857	487.143	10.4354	487.143
WSP_06f_m67_002	WSP	WSP_06f_m67_002.xlsx_RoiSetAuto-22.zip Distance px	160	6891.38	0.950313	487.143	14.1465	487.143
WSP_06f_m67_002	WSP	WSP_06f_m67_002.xlsx_RoiSetAuto-23.zip Distance px	20	5188.31	0.331636	487.143	10.6505	487.143
WSP_06f_m67_002	WSP	WSP_06f_m67_002.xlsx_RoiSetAuto-24.zip Distance px	20	4692.86	0.722207	487.143	9.63343	487.143
WSP_06f_m67_002	WSP	WSP_06f_m67_002.xlsx_RoiSetAuto-25.zip Distance px	56	4970.61	0.485137	487.143	10.2036	487.143
WSP_06f_m67_002	WSP	WSP_06f_m67_002.xlsx_RoiSetAuto-26.zip Distance px	44	5324.71	0.72339	487.143	10.9305	487.143
WSP_06f_m67_002	WSP	WSP_06f_m67_002.xlsx_RoiSetAuto-27.zip Distance px	104	7923.87	0.951114	487.143	16.266	487.143
WSP_06f_m67_002	WSP	WSP_06f_m67_002.xlsx_RoiSetAuto-28.zip Distance px	20	4809.63	0.30569	487.143	9.87314	487.143
WSP_06f_m67_002	WSP	WSP_06f_m67_002.xlsx_RoiSetAuto-29.zip Distance px	20	3995.61	0.859096	487.143	8.20214	487.143
WSP_06f_m67_002	WSP	WSP_06f_m67_002.xlsx_RoiSetAuto-30.zip Distance px	32	4963.54	0.540146	487.143	10.1891	487.143
WSP_06f_m67_002	WSP	WSP_06f_m67_002.xlsx_RoiSetAuto-31.zip Distance px	44	6481.53	0.7787	487.143	13.3052	487.143
WSP_06f_m67_002	WSP	WSP_06f_m67_002.xlsx_RoiSetAuto-32.zip Distance px	16	5108.59	0.281352	487.143	10.4868	487.143
WSP_06f_m67_002	WSP	WSP_06f_m67_002.xlsx_RoiSetAuto-33.zip Distance px	16	5359.85	0.798809	487.143	11.0026	487.143
WSP_06f_m67_002	WSP	WSP_06f_m67_002.xlsx_RoiSetAuto-35.zip Distance px	20	5215.12	0.357509	487.143	10.7055	487.143
WSP_06f_m67_002	WSP	WSP_06f_m67_002.xlsx_RoiSetAuto-36.zip Distance px	16	4973.29	0.050353	487.143	10.2091	487.143
WSP_06f_m67_002	WSP	WSP_06f_m67_002.xlsx_RoiSetAuto-37.zip Distance px	20	5375.74	0.400767	487.143	11.0353	487.143
WSP_06f_m67_002	WSP	WSP_06f_m67_002.xlsx_RoiSetAuto-38.zip Distance px	116	5970.81	0.652815	487.143	12.2568	487.143
WSP_06f_m67_002	WSP	WSP_06f_m67_002.xlsx_RoiSetAuto-39.zip Distance px	72	6314.08	0.999469	487.143	12.9615	487.143
WSP_06f_m67_002	WSP	WSP_06f_m67_002.xlsx_RoiSetAuto-4.zip Distance px	40	4910.33	0.888836	487.143	10.0799	487.143
WSP_06f_m67_002	WSP	WSP_06f_m67_002.xlsx_RoiSetAuto-40.zip Distance px	24	6451.77	0.662476	487.143	13.2441	487.143
WSP_06f_m67_002	WSP	WSP_06f_m67_002.xlsx_RoiSetAuto-41.zip Distance px	16	5481.58	0.464025	487.143	11.2525	487.143
WSP_06f_m67_002	WSP	WSP_06f_m67_002.xlsx_RoiSetAuto-42.zip Distance px	28	6056.97	0.471738	487.143	12.4337	487.143
WSP_06f_m67_002	WSP	WSP_06f_m67_002.xlsx_RoiSetAuto-43.zip Distance px	64	5303.14	0.459684	487.143	10.8862	487.143
WSP_06f_m67_002	WSP	WSP_06f_m67_002.xlsx_RoiSetAuto-44.zip Distance px	32	5184.53	0.276185	487.143	10.6427	487.143
WSP_06f_m67_002	WSP	WSP_06f_m67_002.xlsx_RoiSetAuto-45.zip Distance px	24	5885.77	0.333033	487.143	12.0822	487.143
WSP_06f_m67_002	WSP	WSP_06f_m67_002.xlsx_RoiSetAuto-46.zip Distance px	28	4887.29	0.795601	487.143	10.0326	487.143
WSP_06f_m67_002	WSP	WSP_06f_m67_002.xlsx_RoiSetAuto-47.zip Distance px	16	5710.66	0.421478	487.143	11.7228	487.143
WSP_06f_m67_002	WSP	WSP_06f_m67_002.xlsx_RoiSetAuto-48.zip Distance px	24	5056.15	0.47636	487.143	10.3792	487.143
WSP_06f_m67_002	WSP	WSP_06f_m67_002.xlsx_RoiSetAuto-49.zip Distance px	16	5401.54	0.490309	487.143	11.0882	487.143
WSP_06f_m67_002	WSP	WSP_06f_m67_002.xlsx_RoiSetAuto-50.zip Distance px	40	6051.11	0.651013	487.143	12.4216	487.143
WSP_06f_m67_002	WSP	WSP_06f_m67_002.xlsx_RoiSetAuto-51.zip Distance px	72	6177.65	0.670714	487.143	12.6814	487.143
WSP_06f_m67_002	WSP	WSP_06f_m67_002.xlsx_RoiSetAuto-52.zip Distance px	24	5607.2	0.37924	487.143	11.5104	487.143
WSP_06f_m67_002	WSP	WSP_06f_m67_002.xlsx_RoiSetAuto-55.zip Distance px	68	5421.25	0.715716	487.143	11.1287	487.143
WSP_06f_m67_002	WSP	WSP_06f_m67_002.xlsx_RoiSetAuto-56.zip Distance px	48	5987.83	0.847186	487.143	12.2917	487.143
WSP_06f_m67_002	WSP	WSP_06f_m67_002.xlsx_RoiSetAuto-57.zip Distance px	68	7643.43	1.16464	487.143	15.6903	487.143
WSP_06f_m67_002	WSP	WSP_06f_m67_002.xlsx_RoiSetAuto-59.zip Distance px	64	5741.32	0.91985	487.143	11.7857	487.143
WSP_06f_m67_002	WSP	WSP_06f_m67_002.xlsx_RoiSetAuto-6.zip Distance px	220	9202.59	1.01762	487.143	18.891	487.143
WSP_06f_m67_002	WSP	WSP_06f_m67_002.xlsx_RoiSetAuto-60.zip Distance px	24	5401.19	0.451571	487.143	11.0875	487.143
WSP_06f_m67_002	WSP	WSP_06f_m67_002.xlsx_RoiSetAuto-61.zip Distance px	36	6211.58	0.524645	487.143	12.7511	487.143
WSP_06f_m67_002	WSP	WSP_06f_m67_002.xlsx_RoiSetAuto-62.zip Distance px	16	5327.46	0.206801	487.143	10.9361	487.143
WSP_06f_m67_002	WSP	WSP_06f_m67_002.xlsx_RoiSetAuto-64.zip Distance px	48	7213.02	0.585841	487.143	14.8068	487.143
WSP_06f_m67_002	WSP	WSP_06f_m67_002.xlsx_RoiSetAuto-65.zip Distance px	56	5951.62	0.763533	487.143	12.2174	487.143
WSP_06f_m67_002	WSP	WSP_06f_m67_002.xlsx_RoiSetAuto-66.zip Distance px	20	5374.63	0.313529	487.143	11.033	487.143
WSP_06f_m67_002	WSP	WSP_06f_m67_002.xlsx_RoiSetAuto-67.zip Distance px	20	5826.46	0.638232	487.143	11.9605	487.143
WSP_06f_m67_002	WSP	WSP_06f_m67_002.xlsx_RoiSetAuto-68.zip Distance px	36	5598.27	0.520278	487.143	11.4921	487.143
WSP_06f_m67_002	WSP	WSP_06f_m67_002.xlsx_RoiSetAuto-69.zip Distance px	92	6365.94	0.666395	487.143	13.0679	487.143
WSP_06f_m67_002	WSP	WSP_06f_m67_002.xlsx_RoiSetAuto-7.zip Distance px	16	4928.25	0.295192	487.143	10.1167	487.143
WSP_06f_m67_002	WSP	WSP_06f_m67_002.xlsx_RoiSetAuto-70.zip Distance px	32	5096.55	0.790076	487.143	10.4621	487.143
WSP_06f_m67_002	WSP	WSP_06f_m67_002.xlsx_RoiSetAuto-71.zip Distance px	20	5118.84	0.517535	487.143	10.5079	487.143
WSP_06f_m67_002	WSP	WSP_06f_m67_002.xlsx_RoiSetAuto-72.zip Distance px	16	5817.16	0.217506	487.143	11.9414	487.143
WSP_06f_m67_002	WSP	WSP_06f_m67_002.xlsx_RoiSetAuto-73.zip Distance px	48	5650.3	0.745623	487.143	11.5989	487.143
WSP_06f_m67_002	WSP	WSP_06f_m67_002.xlsx_RoiSetAuto-74.zip Distance px	20	3958.01	0.530584	487.143	8.12495	487.143
WSP_06f_m67_002	WSP	WSP_06f_m67_002.xlsx_RoiSetAuto-75.zip Distance px	36	5357.53	0.691643	487.143	10.9979	487.143
WSP_06f_m67_002	WSP	WSP_06f_m67_002.xlsx_RoiSetAuto-77.zip Distance px	24	7063.96	0.251887	487.143	14.5008	487.143
WSP_06f_m67_002	WSP	WSP_06f_m67_002.xlsx_RoiSetAuto-78.zip Distance px	16	4866.07	0.574972	487.143	9.98901	487.143
WSP_06f_m67_002	WSP	WSP_06f_m67_002.xlsx_RoiSetAuto-79.zip Distance px	20	5748.01	0.348357	487.143	11.7994	487.143
WSP_06f_m67_002	WSP	WSP_06f_m67_002.xlsx_RoiSetAuto-8.zip Distance px	20	8703.03	0.366794	487.143	17.8655	487.143
WSP_06f_m67_002	WSP	WSP_06f_m67_002.xlsx_RoiSetAuto-80.zip Distance px	48	6185.79	1.11042	487.143	12.6981	487.143
WSP_06f_m67_002	WSP	WSP_06f_m67_002.xlsx_RoiSetAuto-81.zip Distance px	108	6275.17	0.843744	487.143	12.8816	487.143
WSP_06f_m67_002	WSP	WSP_06f_m67_002.xlsx_RoiSetAuto-82.zip Distance px	24	5396.65	0.564155	487.143	11.0782	487.143
WSP_06f_m67_002	WSP	WSP_06f_m67_002.xlsx_RoiSetAuto-83.zip Distance px	28	6133.55	0.988978	487.143	12.5909	487.143
WSP_06f_m67_002	WSP	WSP_06f_m67_002.xlsx_RoiSetAuto-84.zip Distance px	28	5485.29	0.439628	487.143	11.2601	487.143
WSP_06f_m67_002	WSP	WSP_06f_m67_002.xlsx_RoiSetAuto-85.zip Distance px	16	5631.35	0.531169	487.143	11.56	487.143
WSP_06f_m67_002	WSP	WSP_06f_m67_002.xlsx_RoiSetAuto-86.zip Distance px	16	4901.6	0.458844	487.143	10.0619	487.143
WSP_06f_m67_002	WSP	WSP_06f_m67_002.xlsx_RoiSetAuto-87.zip Distance px	16	6131.04	0.186742	487.143	12.5857	487.143
WSP_06f_m67_002	WSP	WSP_06f_m67_002.xlsx_RoiSetAuto-88.zip Distance px	20	5608.89	0.477008	487.143	11.5139	487.143
WSP_06f_m67_002	WSP	WSP_06f_m67_002.xlsx_RoiSetAuto-89.zip Distance px	60	7967.2	0.979445	487.143	16.355	487.143
WSP_06f_m67_002	WSP	WSP_06f_m67_002.xlsx_RoiSetAuto-90.zip Distance px	20	5802.01	0.235904	487.143	11.9103	487.143
WSP_06f_m67_002	WSP	WSP_06f_m67_002.xlsx_RoiSetAuto-91.zip Distance px	52	5223.18	0.490511	487.143	10.7221	487.143
WSP_06f_m67_002	WSP	WSP_06f_m67_002.xlsx_RoiSetAuto-92.zip Distance px	24	4337.06	0.784265	487.143	8.90305	487.143
WSP_06f_m67_002	WSP	WSP_06f_m67_002.xlsx_RoiSetAuto-93.zip Distance px	32	5141.47	0.290345	487.143	10.5543	487.143
WSP_06f_m67_002	WSP	WSP_06f_m67_002.xlsx_RoiSetAuto-95.zip Distance px	88	6199.33	0.786988	487.143	12.7259	487.143
WSP_06f_m67_002	WSP	WSP_06f_m67_002.xlsx_RoiSetAuto-96.zip Distance px	28	6356.77	0.582774	487.143	13.0491	487.143
WSP_06f_m67_002	WSP	WSP_06f_m67_002.xlsx_RoiSetAuto-97.zip Distance px	20	7143.61	0.81547	487.143	14.6643	487.143
WSP_06f_m67_002	WSP	WSP_06f_m67_002.xlsx_RoiSetAuto-98.zip Distance px	40	5881.42	0.690576	487.143	12.0733	487.143
WSP_06f_m67_002	WSP	WSP_06f_m67_002.xlsx_RoiSetAuto-99.zip Distance px	24	5041.1	0.504499	487.143	10.3483	487.143
WSP_07f_m67_001	WSP	WSP_07f_m67_001.xlsx_RoiSetAuto-1.zip Distance px	32	5148.16	0.612104	265.707	19.3753	265.707
WSP_07f_m67_001	WSP	WSP_07f_m67_001.xlsx_RoiSetAuto-10.zip Distance px	24	3142.7	0.641698	265.707	11.8277	265.707
WSP_07f_m67_001	WSP	WSP_07f_m67_001.xlsx_RoiSetAuto-11.zip Distance px	16	3101.52	0.437548	265.707	11.6727	265.707
WSP_07f_m67_001	WSP	WSP_07f_m67_001.xlsx_RoiSetAuto-12.zip Distance px	28	2927.27	0.382694	265.707	11.0169	265.707
WSP_07f_m67_001	WSP	WSP_07f_m67_001.xlsx_RoiSetAuto-13.zip Distance px	32	3074.95	0.771086	265.707	11.5727	265.707
WSP_07f_m67_001	WSP	WSP_07f_m67_001.xlsx_RoiSetAuto-14.zip Distance px	20	2363.01	0.749361	265.707	8.8933	265.707
WSP_07f_m67_001	WSP	WSP_07f_m67_001.xlsx_RoiSetAuto-15.zip Distance px	44	3503.39	0.981233	265.707	13.1851	265.707
WSP_07f_m67_001	WSP	WSP_07f_m67_001.xlsx_RoiSetAuto-16.zip Distance px	204	4703.33	1.60816	265.707	17.7012	265.707
WSP_07f_m67_001	WSP	WSP_07f_m67_001.xlsx_RoiSetAuto-17.zip Distance px	44	2902.64	0.709086	265.707	10.9242	265.707
WSP_07f_m67_001	WSP	WSP_07f_m67_001.xlsx_RoiSetAuto-18.zip Distance px	16	2669.55	0.54226	265.707	10.047	265.707
WSP_07f_m67_001	WSP	WSP_07f_m67_001.xlsx_RoiSetAuto-19.zip Distance px	28	2829.91	0.694696	265.707	10.6505	265.707
WSP_07f_m67_001	WSP	WSP_07f_m67_001.xlsx_RoiSetAuto-2.zip Distance px	36	2982.55	0.463727	265.707	11.2249	265.707
WSP_07f_m67_001	WSP	WSP_07f_m67_001.xlsx_RoiSetAuto-20.zip Distance px	20	4290.79	0.725999	265.707	16.1486	265.707
WSP_07f_m67_001	WSP	WSP_07f_m67_001.xlsx_RoiSetAuto-21.zip Distance px	24	3269.16	0.666755	265.707	12.3036	265.707
WSP_07f_m67_001	WSP	WSP_07f_m67_001.xlsx_RoiSetAuto-22.zip Distance px	40	2999.05	0.574894	265.707	11.2871	265.707
WSP_07f_m67_001	WSP	WSP_07f_m67_001.xlsx_RoiSetAuto-23.zip Distance px	20	2985.13	0.362875	265.707	11.2347	265.707
WSP_07f_m67_001	WSP	WSP_07f_m67_001.xlsx_RoiSetAuto-24.zip Distance px	28	2685.46	0.47249	265.707	10.1068	265.707
WSP_07f_m67_001	WSP	WSP_07f_m67_001.xlsx_RoiSetAuto-25.zip Distance px	68	4890.64	0.90274	265.707	18.4061	265.707
WSP_07f_m67_001	WSP	WSP_07f_m67_001.xlsx_RoiSetAuto-26.zip Distance px	36	3512.94	1.0066	265.707	13.2211	265.707
WSP_07f_m67_001	WSP	WSP_07f_m67_001.xlsx_RoiSetAuto-27.zip Distance px	16	3333.31	0.191932	265.707	12.545	265.707
WSP_07f_m67_001	WSP	WSP_07f_m67_001.xlsx_RoiSetAuto-28.zip Distance px	28	3972.89	0.791729	265.707	14.9522	265.707
WSP_07f_m67_001	WSP	WSP_07f_m67_001.xlsx_RoiSetAuto-29.zip Distance px	56	2683.87	0.670921	265.707	10.1009	265.707
WSP_07f_m67_001	WSP	WSP_07f_m67_001.xlsx_RoiSetAuto-30.zip Distance px	16	3826.66	0.337298	265.707	14.4018	265.707
WSP_07f_m67_001	WSP	WSP_07f_m67_001.xlsx_RoiSetAuto-31.zip Distance px	28	3690.58	0.28614	265.707	13.8896	265.707
WSP_07f_m67_001	WSP	WSP_07f_m67_001.xlsx_RoiSetAuto-32.zip Distance px	72	3508.31	0.896741	265.707	13.2037	265.707
WSP_07f_m67_001	WSP	WSP_07f_m67_001.xlsx_RoiSetAuto-34.zip Distance px	24	3156.08	0.418789	265.707	11.878	265.707
WSP_07f_m67_001	WSP	WSP_07f_m67_001.xlsx_RoiSetAuto-35.zip Distance px	28	3037.54	0.559954	265.707	11.4319	265.707
WSP_07f_m67_001	WSP	WSP_07f_m67_001.xlsx_RoiSetAuto-36.zip Distance px	80	4029.56	0.790203	265.707	15.1654	265.707
WSP_07f_m67_001	WSP	WSP_07f_m67_001.xlsx_RoiSetAuto-37.zip Distance px	36	2877.26	0.72288	265.707	10.8287	265.707
WSP_07f_m67_001	WSP	WSP_07f_m67_001.xlsx_RoiSetAuto-38.zip Distance px	184	3837.83	1.25281	265.707	14.4438	265.707
WSP_07f_m67_001	WSP	WSP_07f_m67_001.xlsx_RoiSetAuto-39.zip Distance px	16	2880.71	0.435336	265.707	10.8417	265.707
WSP_07f_m67_001	WSP	WSP_07f_m67_001.xlsx_RoiSetAuto-40.zip Distance px	28	3231.77	1.0539	265.707	12.1629	265.707
WSP_07f_m67_001	WSP	WSP_07f_m67_001.xlsx_RoiSetAuto-41.zip Distance px	16	3728.83	0.522156	265.707	14.0336	265.707
WSP_07f_m67_001	WSP	WSP_07f_m67_001.xlsx_RoiSetAuto-42.zip Distance px	16	2778.25	0.336857	265.707	10.4561	265.707
WSP_07f_m67_001	WSP	WSP_07f_m67_001.xlsx_RoiSetAuto-43.zip Distance px	32	4084.4	0.488531	265.707	15.3718	265.707
WSP_07f_m67_001	WSP	WSP_07f_m67_001.xlsx_RoiSetAuto-44.zip Distance px	48	4475.12	0.585609	265.707	16.8423	265.707
WSP_07f_m67_001	WSP	WSP_07f_m67_001.xlsx_RoiSetAuto-46.zip Distance px	28	4531.36	0.660202	265.707	17.054	265.707
WSP_07f_m67_001	WSP	WSP_07f_m67_001.xlsx_RoiSetAuto-47.zip Distance px	16	3085.35	0.371971	265.707	11.6119	265.707
WSP_07f_m67_001	WSP	WSP_07f_m67_001.xlsx_RoiSetAuto-48.zip Distance px	60	4082.94	1.1098	265.707	15.3663	265.707
WSP_07f_m67_001	WSP	WSP_07f_m67_001.xlsx_RoiSetAuto-49.zip Distance px	88	3987.55	0.884985	265.707	15.0073	265.707
WSP_07f_m67_001	WSP	WSP_07f_m67_001.xlsx_RoiSetAuto-5.zip Distance px	56	3875.7	0.760368	265.707	14.5864	265.707
WSP_07f_m67_001	WSP	WSP_07f_m67_001.xlsx_RoiSetAuto-50.zip Distance px	20	4065.57	0.847693	265.707	15.301	265.707
WSP_07f_m67_001	WSP	WSP_07f_m67_001.xlsx_RoiSetAuto-51.zip Distance px	40	3319.2	0.839691	265.707	12.492	265.707
WSP_07f_m67_001	WSP	WSP_07f_m67_001.xlsx_RoiSetAuto-53.zip Distance px	20	3123.9	0.422393	265.707	11.7569	265.707
WSP_07f_m67_001	WSP	WSP_07f_m67_001.xlsx_RoiSetAuto-54.zip Distance px	20	3653.2	0.762557	265.707	13.749	265.707
WSP_07f_m67_001	WSP	WSP_07f_m67_001.xlsx_RoiSetAuto-55.zip Distance px	28	3501.65	0.574185	265.707	13.1786	265.707
WSP_07f_m67_001	WSP	WSP_07f_m67_001.xlsx_RoiSetAuto-56.zip Distance px	16	4119.78	0.340076	265.707	15.505	265.707
WSP_07f_m67_001	WSP	WSP_07f_m67_001.xlsx_RoiSetAuto-57.zip Distance px	16	3156.94	0.503971	265.707	11.8813	265.707
WSP_07f_m67_001	WSP	WSP_07f_m67_001.xlsx_RoiSetAuto-6.zip Distance px	232	4464.4	1.43573	265.707	16.802	265.707
WSP_07f_m67_001	WSP	WSP_07f_m67_001.xlsx_RoiSetAuto-7.zip Distance px	236	5447.47	1.79447	265.707	20.5018	265.707
WSP_07f_m67_001	WSP	WSP_07f_m67_001.xlsx_RoiSetAuto-8.zip Distance px	20	2867.72	0.573728	265.707	10.7928	265.707
WSP_07f_m67_001	WSP	WSP_07f_m67_001.xlsx_RoiSetAuto-9.zip Distance px	20	2100.44	0.55661	265.707	7.90509	265.707
WSP_07f_m67_002	WSP	WSP_07f_m67_002.xlsx_RoiSetAuto-1.zip Distance px	32	1970.28	0.836121	181.091	10.8801	181.091
WSP_07f_m67_002	WSP	WSP_07f_m67_002.xlsx_RoiSetAuto-10.zip Distance px	16	1917.58	0.190966	181.091	10.5891	181.091
WSP_07f_m67_002	WSP	WSP_07f_m67_002.xlsx_RoiSetAuto-11.zip Distance px	24	2568.23	0.716267	181.091	14.182	181.091
WSP_07f_m67_002	WSP	WSP_07f_m67_002.xlsx_RoiSetAuto-14.zip Distance px	28	2032.28	0.867205	181.091	11.2225	181.091
WSP_07f_m67_002	WSP	WSP_07f_m67_002.xlsx_RoiSetAuto-15.zip Distance px	24	1704.94	0.834562	181.091	9.41486	181.091
WSP_07f_m67_002	WSP	WSP_07f_m67_002.xlsx_RoiSetAuto-16.zip Distance px	64	2952.22	1.02792	181.091	16.3025	181.091
WSP_07f_m67_002	WSP	WSP_07f_m67_002.xlsx_RoiSetAuto-17.zip Distance px	64	2021.87	0.969479	181.091	11.165	181.091
WSP_07f_m67_002	WSP	WSP_07f_m67_002.xlsx_RoiSetAuto-18.zip Distance px	188	2897.95	1.39724	181.091	16.0028	181.091
WSP_07f_m67_002	WSP	WSP_07f_m67_002.xlsx_RoiSetAuto-19.zip Distance px	64	2663.3	1.04802	181.091	14.707	181.091
WSP_07f_m67_002	WSP	WSP_07f_m67_002.xlsx_RoiSetAuto-2.zip Distance px	32	1802.51	0.758036	181.091	9.95362	181.091
WSP_07f_m67_002	WSP	WSP_07f_m67_002.xlsx_RoiSetAuto-20.zip Distance px	16	2376.28	0.790684	181.091	13.122	181.091
WSP_07f_m67_002	WSP	WSP_07f_m67_002.xlsx_RoiSetAuto-21.zip Distance px	16	1840.59	0.223172	181.091	10.1639	181.091
WSP_07f_m67_002	WSP	WSP_07f_m67_002.xlsx_RoiSetAuto-22.zip Distance px	20	1823.16	0.611717	181.091	10.0677	181.091
WSP_07f_m67_002	WSP	WSP_07f_m67_002.xlsx_RoiSetAuto-23.zip Distance px	72	2620.32	1.20767	181.091	14.4696	181.091
WSP_07f_m67_002	WSP	WSP_07f_m67_002.xlsx_RoiSetAuto-24.zip Distance px	16	2109.9	0.3306	181.091	11.6511	181.091
WSP_07f_m67_002	WSP	WSP_07f_m67_002.xlsx_RoiSetAuto-25.zip Distance px	104	3672.2	1.45892	181.091	20.2782	181.091
WSP_07f_m67_002	WSP	WSP_07f_m67_002.xlsx_RoiSetAuto-26.zip Distance px	20	2114.52	0.592741	181.091	11.6766	181.091
WSP_07f_m67_002	WSP	WSP_07f_m67_002.xlsx_RoiSetAuto-27.zip Distance px	20	1878.05	0.508782	181.091	10.3708	181.091
WSP_07f_m67_002	WSP	WSP_07f_m67_002.xlsx_RoiSetAuto-28.zip Distance px	16	2295.69	0.671455	181.091	12.677	181.091
WSP_07f_m67_002	WSP	WSP_07f_m67_002.xlsx_RoiSetAuto-29.zip Distance px	20	2921.2	0.49959	181.091	16.1312	181.091
WSP_07f_m67_002	WSP	WSP_07f_m67_002.xlsx_RoiSetAuto-3.zip Distance px	212	5386.36	1.0795	181.091	29.744	181.091
WSP_07f_m67_002	WSP	WSP_07f_m67_002.xlsx_RoiSetAuto-30.zip Distance px	16	2306.42	1.01935	181.091	12.7363	181.091
WSP_07f_m67_002	WSP	WSP_07f_m67_002.xlsx_RoiSetAuto-31.zip Distance px	56	4336.59	0.750118	181.091	23.9471	181.091
WSP_07f_m67_002	WSP	WSP_07f_m67_002.xlsx_RoiSetAuto-32.zip Distance px	24	1595.64	1.01743	181.091	8.81126	181.091
WSP_07f_m67_002	WSP	WSP_07f_m67_002.xlsx_RoiSetAuto-33.zip Distance px	24	2206.63	0.703599	181.091	12.1852	181.091
WSP_07f_m67_002	WSP	WSP_07f_m67_002.xlsx_RoiSetAuto-4.zip Distance px	172	3826.61	1.1847	181.091	21.1309	181.091
WSP_07f_m67_002	WSP	WSP_07f_m67_002.xlsx_RoiSetAuto-5.zip Distance px	16	2145.8	0.308781	181.091	11.8493	181.091
WSP_07f_m67_002	WSP	WSP_07f_m67_002.xlsx_RoiSetAuto-6.zip Distance px	128	3781.49	1.18157	181.091	20.8817	181.091
WSP_07f_m67_002	WSP	WSP_07f_m67_002.xlsx_RoiSetAuto-7.zip Distance px	20	1660.93	0.813042	181.091	9.17181	181.091
WSP_07f_m67_002	WSP	WSP_07f_m67_002.xlsx_RoiSetAuto-8.zip Distance px	32	1752.02	0.671248	181.091	9.67482	181.091
WSP_07f_m67_002	WSP	WSP_07f_m67_002.xlsx_RoiSetAuto-9.zip Distance px	40	1841.69	1.20156	181.091	10.17	181.091
WSP_07f_m67_003	WSP	WSP_07f_m67_003.xlsx_RoiSetAuto-1.zip Distance px	16	1998.64	0.538467	281.928	7.08921	281.928
WSP_07f_m67_003	WSP	WSP_07f_m67_003.xlsx_RoiSetAuto-10.zip Distance px	48	3406.25	0.519573	281.928	12.082	281.928
WSP_07f_m67_003	WSP	WSP_07f_m67_003.xlsx_RoiSetAuto-11.zip Distance px	24	2838.67	0.425137	281.928	10.0688	281.928
WSP_07f_m67_003	WSP	WSP_07f_m67_003.xlsx_RoiSetAuto-12.zip Distance px	20	2973.69	0.359586	281.928	10.5477	281.928
WSP_07f_m67_003	WSP	WSP_07f_m67_003.xlsx_RoiSetAuto-13.zip Distance px	44	3227.96	0.800767	281.928	11.4496	281.928
WSP_07f_m67_003	WSP	WSP_07f_m67_003.xlsx_RoiSetAuto-14.zip Distance px	16	2021.63	0.609529	281.928	7.17074	281.928
WSP_07f_m67_003	WSP	WSP_07f_m67_003.xlsx_RoiSetAuto-15.zip Distance px	24	3081.71	0.73985	281.928	10.9309	281.928
WSP_07f_m67_003	WSP	WSP_07f_m67_003.xlsx_RoiSetAuto-16.zip Distance px	56	3354.3	1.13603	281.928	11.8977	281.928
WSP_07f_m67_003	WSP	WSP_07f_m67_003.xlsx_RoiSetAuto-17.zip Distance px	20	2314.94	0.491208	281.928	8.21111	281.928
WSP_07f_m67_003	WSP	WSP_07f_m67_003.xlsx_RoiSetAuto-18.zip Distance px	76	3325.82	0.927004	281.928	11.7967	281.928
WSP_07f_m67_003	WSP	WSP_07f_m67_003.xlsx_RoiSetAuto-19.zip Distance px	40	3292.92	0.642471	281.928	11.68	281.928
WSP_07f_m67_003	WSP	WSP_07f_m67_003.xlsx_RoiSetAuto-2.zip Distance px	16	1657.38	0.338855	281.928	5.87875	281.928
WSP_07f_m67_003	WSP	WSP_07f_m67_003.xlsx_RoiSetAuto-20.zip Distance px	16	3918.87	0.254724	281.928	13.9003	281.928
WSP_07f_m67_003	WSP	WSP_07f_m67_003.xlsx_RoiSetAuto-21.zip Distance px	20	3627.12	0.382999	281.928	12.8654	281.928
WSP_07f_m67_003	WSP	WSP_07f_m67_003.xlsx_RoiSetAuto-22.zip Distance px	36	3581.97	0.628364	281.928	12.7053	281.928
WSP_07f_m67_003	WSP	WSP_07f_m67_003.xlsx_RoiSetAuto-23.zip Distance px	28	3048.79	0.523549	281.928	10.8141	281.928
WSP_07f_m67_003	WSP	WSP_07f_m67_003.xlsx_RoiSetAuto-24.zip Distance px	20	3121.15	0.555563	281.928	11.0707	281.928
WSP_07f_m67_003	WSP	WSP_07f_m67_003.xlsx_RoiSetAuto-25.zip Distance px	56	3607.97	1.08029	281.928	12.7975	281.928
WSP_07f_m67_003	WSP	WSP_07f_m67_003.xlsx_RoiSetAuto-26.zip Distance px	16	2723.83	0.369345	281.928	9.66147	281.928
WSP_07f_m67_003	WSP	WSP_07f_m67_003.xlsx_RoiSetAuto-27.zip Distance px	16	3487.89	0.419748	281.928	12.3716	281.928
WSP_07f_m67_003	WSP	WSP_07f_m67_003.xlsx_RoiSetAuto-28.zip Distance px	24	3414.12	0.305139	281.928	12.1099	281.928
WSP_07f_m67_003	WSP	WSP_07f_m67_003.xlsx_RoiSetAuto-29.zip Distance px	16	2753.62	0.276007	281.928	9.76713	281.928
WSP_07f_m67_003	WSP	WSP_07f_m67_003.xlsx_RoiSetAuto-3.zip Distance px	40	1871.81	0.850349	281.928	6.63934	281.928
WSP_07f_m67_003	WSP	WSP_07f_m67_003.xlsx_RoiSetAuto-30.zip Distance px	20	3501.19	0.723064	281.928	12.4187	281.928
WSP_07f_m67_003	WSP	WSP_07f_m67_003.xlsx_RoiSetAuto-32.zip Distance px	24	3304.12	0.830283	281.928	11.7197	281.928
WSP_07f_m67_003	WSP	WSP_07f_m67_003.xlsx_RoiSetAuto-33.zip Distance px	24	2996.75	0.593741	281.928	10.6295	281.928
WSP_07f_m67_003	WSP	WSP_07f_m67_003.xlsx_RoiSetAuto-34.zip Distance px	32	3678.6	0.90694	281.928	13.048	281.928
WSP_07f_m67_003	WSP	WSP_07f_m67_003.xlsx_RoiSetAuto-35.zip Distance px	32	3841.58	1.01094	281.928	13.6261	281.928
WSP_07f_m67_003	WSP	WSP_07f_m67_003.xlsx_RoiSetAuto-36.zip Distance px	36	3541.07	0.565147	281.928	12.5602	281.928
WSP_07f_m67_003	WSP	WSP_07f_m67_003.xlsx_RoiSetAuto-37.zip Distance px	16	4394.03	0.39034	281.928	15.5857	281.928
WSP_07f_m67_003	WSP	WSP_07f_m67_003.xlsx_RoiSetAuto-4.zip Distance px	48	3643.77	0.765897	281.928	12.9245	281.928
WSP_07f_m67_003	WSP	WSP_07f_m67_003.xlsx_RoiSetAuto-5.zip Distance px	16	2950.5	0.779761	281.928	10.4655	281.928
WSP_07f_m67_003	WSP	WSP_07f_m67_003.xlsx_RoiSetAuto-6.zip Distance px	116	4277.93	0.856915	281.928	15.1739	281.928
WSP_07f_m67_003	WSP	WSP_07f_m67_003.xlsx_RoiSetAuto-7.zip Distance px	204	4333.88	1.02911	281.928	15.3723	281.928
WSP_07f_m67_003	WSP	WSP_07f_m67_003.xlsx_RoiSetAuto-8.zip Distance px	24	2836.75	0.786257	281.928	10.062	281.928
WSP_07f_m67_003	WSP	WSP_07f_m67_003.xlsx_RoiSetAuto-9.zip Distance px	16	2271.17	0.702725	281.928	8.05587	281.928

## Sheet: PT-NMJ-LiveFormulae
Rev FN	File	CellArea	Ch1Mean	Ch1CoV	MovieDuration	Duration	Intensity	NormIntRange	Patch/Area	Patch/10um2/min	Pct4-28	Pct32-100	>100			Patches/10um/min
CON_01f_m67_001	CON_01f_m67_001_ Reg.tif	56.1956	2418.57	0.63898	91	52.5926	30798.9	0.582685	0.480465	0.791975	37.037	55.5556	7.40741			0.791975
CON_01f_m67_002	CON_01f_m67_002_ Reg.tif	41.3867	1556.48	0.54829	91	53.8462	18006.8	0.513426	0.942332	1.5533	53.8462	25.641	20.5128			1.5533
CON_01f_m67_003	CON_01f_m67_003_ Reg.tif	88.8356	618.606	0.5679	91	43.1765	9512.9	0.726577	0.765459	1.26175	48.5294	47.0588	4.41176			1.26175
CON_02f_m67_002	CON_02f_m67_002_ Reg.tif	40.2489	1412.08	0.52878	75	60.4706	20387.4	0.595524	0.422372	0.844744	35.2941	52.9412	11.7647			0.844744
CON_03f_m67_001	CON_03f_m67_001_ Reg.tif	186.827	825.534	0.65068	91	47.528	10717.7	0.613032	0.861761	1.42049	45.3416	43.4783	11.1801			1.42049
CON_03f_m67_002	CON_03f_m67_002_ Reg.tif	37.8489	285.081	0.56127	91	49.6	4028.6	0.874433	0.660521	1.08877	36	56	8			1.08877
CON_03f_m67_003	CON_03f_m67_003_ Reg.tif	127.04	610.563	0.62913	91	36.7273	8350.18	0.563422	0.865869	1.42726	61.8182	35.4545	2.72727			1.42726
CON_05f_m67_001	CON_05f_m67_001_ Reg.tif	131.822	763.024	0.58557	91	44.6265	10467.2	0.602898	0.629636	1.03786	43.3735	53.012	3.61446			1.03786
CON_05f_m67_002	CON_05f_m67_002_ Reg.tif	84.8	851.902	0.66386	87	60.7826	13171.8	0.696397	0.542453	0.935264	34.7826	45.6522	19.5652			0.935264
CON_06f_m67_001	CON_06f_m67_001_ Reg.tif	251.147	433.857	0.6185	91	47.5122	6595.76	0.727055	0.816256	1.34548	50.7317	41.4634	7.80488			1.34548
CON_06f_m67_002	CON_06f_m67_002_ Reg.tif	64.2844	506.278	0.75335	91	43.25	7957.78	0.734692	0.746681	1.23079	43.75	50	6.25			1.23079
WSP_01f_m67_001	WSP_01f_m67_001_ Reg.tif	48.0178	616.716	0.58077	91	74.5455	8850.66	0.681449	0.458164	0.755215	22.7273	59.0909	18.1818			0.755215
WSP_01f_m67_002	WSP_01f_m67_002_ Reg.tif	54.0089	814.225	0.44816	91	65.7391	10986.9	0.576123	0.425856	0.70196	52.1739	30.4348	17.3913			0.70196
WSP_03f_m67_001	WSP_03f_m67_001_ Reg.tif	78.1511	1158.34	0.56747	91	51.4182	12974.8	0.570201	0.703765	1.16005	45.4545	40	14.5455			1.16005
WSP_03f_m67_002	WSP_03f_m67_002_ Reg.tif	84.9422	855.763	0.37229	91	47.8333	10212.8	0.467921	0.282545	0.465734	54.1667	37.5	8.33333			0.465734
WSP_03f_m67_003	WSP_03f_m67_003_ Reg.tif	72.3911	488.932	0.46374	91	57.4118	7685.79	0.703994	0.234835	0.387091	35.2941	52.9412	11.7647			0.387091
WSP_04f_m67_001	WSP_04f_m67_001_ Reg.tif	75.04	1166.22	0.58014	91	99.8182	16865.2	0.763198	0.293177	0.483259	18.1818	45.4545	36.3636			0.483259
WSP_04f_m67_002	WSP_04f_m67_002_ Reg.tif	21.0489	838.627	0.34867	89	30.4	10569.4	0.370635	0.237542	0.400352	60	40	0
WSP_04f_m67_003	WSP_04f_m67_003_ Reg.tif	80.1956	992.863	0.33135	91	39.6923	12165.1	0.482507	0.324207	0.534408	53.8462	46.1538	0			0.534408
WSP_05f_m67_001	WSP_05f_m67_001_ Reg.tif	124.942	521.919	0.52989	58	41.6	6597.75	0.602303	0.400185	1.03496	56	38	6			1.03496
WSP_05f_m67_002	WSP_05f_m67_002_ Reg.tif	62.1156	1433.42	0.51226	58	57.8667	15710	0.564415	0.241485	0.624531	40	40	20			0.624531
WSP_06f_m67_001	WSP_06f_m67_001_ Reg.tif	99.7156	618.755	0.61629	91	62.8475	8552.92	0.661351	0.591683	0.975302	49.1525	32.2034	18.6441			0.975302
WSP_06f_m67_002	WSP_06f_m67_002_ Reg.tif	139.093	487.143	0.5461	91	43.2	5885.81	0.59296	0.682995	1.12582	52.6316	40	7.36842			1.12582
WSP_07f_m67_001	WSP_07f_m67_001_ Reg.tif	44.0711	265.707	0.67133	91	46.1538	3509.58	0.693966	1.17991	1.94491	57.6923	34.6154	7.69231			1.94491
WSP_07f_m67_002	WSP_07f_m67_002_ Reg.tif	31.7689	181.091	0.61708	91	51.4839	2484.62	0.821678	0.975797	1.60846	54.8387	29.0323	16.129			1.60846
WSP_07f_m67_003	WSP_07f_m67_003_ Reg.tif	73.1733	281.928	0.55478	78	36	3172.84	0.642102	0.491983	0.94612	61.1111	33.3333	5.55556			0.94612

## Sheet: PT-NMJ-Values
			899.267	714.777		0.607851	0.516021		48.1123	53.734		13.8439	12.9138		0.660884	0.612987		1.19008	0.876544		45.7502	47.5514		44.5359	39.9173		9.71387	12.5313
Rev FN	Rev FN		Ch1Mean	Ch1Mean		Ch1CoV	Ch1CoV		Duration	Duration		NormInt	NormInt		NormIntRange	NormIntRange		Patch/10um2/min	Patch/10um2/min		Pct4-28			Pct32-100			>100
Con	WASp		Con	WASp		Con	WASp		Con	WASp		Con	WASp		Con	WASp		Con	WASp		Con	WASp		Con	WASp		Con	WASp
CON_01f_m67_001	WSP_01f_m67_001		2418.57	616.716		0.63898	0.58077		52.5926	74.5455		12.7343	14.3513		0.582685	0.681449		0.791975	0.755215		37.037	22.7273		55.5556	59.0909		7.40741	18.1818
CON_01f_m67_002	WSP_01f_m67_002		1556.48	814.225		0.54829	0.44816		53.8462	65.7391		11.5689	13.4937		0.513426	0.576123		1.5533	0.70196		53.8462	52.1739		25.641	30.4348		20.5128	17.3913
CON_01f_m67_003	WSP_03f_m67_001		618.606	1158.34		0.5679	0.56747		43.1765	51.4182		15.378	11.2012		0.726577	0.570201		1.26175	1.16005		48.5294	45.4545		47.0588	40		4.41176	14.5455
CON_02f_m67_002	WSP_03f_m67_002		1412.08	855.763		0.52878	0.37229		60.4706	47.8333		14.4379	11.9342		0.595524	0.467921		0.844744	0.465734		35.2941	54.1667		52.9412	37.5		11.7647	8.33333
CON_03f_m67_001	WSP_03f_m67_003		825.534	488.932		0.65068	0.46374		47.528	57.4118		12.9828	15.7195		0.613032	0.703994		1.42049	0.387091		45.3416	35.2941		43.4783	52.9412		11.1801	11.7647
CON_03f_m67_002	WSP_04f_m67_001		285.081	1166.22		0.56127	0.58014		49.6	99.8182		14.1314	14.4614		0.874433	0.763198		1.08877	0.483259		36	18.1818		56	45.4545		8	36.3636
CON_03f_m67_003	WSP_04f_m67_002		610.563	838.627		0.62913	0.34867		36.7273	30.4		13.6762	12.6032		0.563422	0.370635		1.42726	0.400352		61.8182	60		35.4545	40		2.72727	0
CON_05f_m67_001	WSP_04f_m67_003		763.024	992.863		0.58557	0.33135		44.6265	39.6923		13.7181	12.2526		0.602898	0.482507		1.03786	0.534408		43.3735	53.8462		53.012	46.1538		3.61446	0
CON_05f_m67_002	WSP_05f_m67_001		851.902	521.919		0.66386	0.52989		60.7826	41.6		15.4617	12.6413		0.696397	0.602303		0.935264	1.03496		34.7826	56		45.6522	38		19.5652	6
CON_06f_m67_001	WSP_05f_m67_002		433.857	1433.42		0.6185	0.51226		47.5122	57.8667		15.2026	10.9598		0.727055	0.564415		1.34548	0.624531		50.7317	40		41.4634	40		7.80488	20
CON_06f_m67_002	WSP_06f_m67_001		506.278	618.755		0.75335	0.61629		43.25	62.8475		15.7182	13.8228		0.734692	0.661351		1.23079	0.975302		43.75	49.1525		50	32.2034		6.25	18.6441
	WSP_06f_m67_002			487.143			0.5461			43.2			12.0823			0.59296			1.12582			52.6316			40			7.36842
	WSP_07f_m67_001			265.707			0.67133			46.1538			13.2085			0.693966			1.94491			57.6923			34.6154			7.69231
	WSP_07f_m67_002			181.091			0.61708			51.4839			13.7203			0.821678			1.60846			54.8387			29.0323			16.129
	WSP_07f_m67_003			281.928			0.55478			36			11.2541			0.642102			0.94612			61.1111			33.3333			5.55556
GMA-01f_m67_002			951.747			0.614			48.9412			14.1957			0.701601			1.44475			41.1765			43.1373			15.6863
GMA-01f_m67_003			613.194			0.532			42.5833			13.8639			0.716938			1.02311			51.0417			44.7917			4.16667
GMA-03f_m67_001			651.102			0.659			35.4737			12.4047			0.571432			1.40821			71.0526			21.0526			7.89474
GMA-03f_m67_002			1163.02			0.65			50.9474			14.6353			0.656821			1.18138			38.9474			50.5263			10.5263
GMA-03f_m67_003			459.021			0.577			49.3333			14.9655			0.763149			1.26166			41.1765			49.0196			9.80392
GMA-04f_m67_001			1328.73			0.646			55.7551			11.8779			0.565406			1.01958			48.9796			30.6122			20.4082
GMA-04f_m67_002			738.017			0.517			42.875			12.2368			0.690426			1.14514			40.625			56.25			3.125

## Sheet: PooledPTData-Values
NMJ	NMJ	Duration	Duration		NormIntensityRange	NormIntensityRange		NormPatchInt	NormPatchInt
Con	WASp	Con	WASp		Con	WASp		Con	WASp
CON_01f_m67_001	WSP_01f_m67_001	276	124		1.14339	1.45563		18.1822	21.9
CON_01f_m67_001	WSP_01f_m67_001	48	44		0.832884	0.623582		12.4716	11.9273
CON_01f_m67_001	WSP_01f_m67_001	24	20		0.216692	0.404419		9.22301	9.66373
CON_01f_m67_001	WSP_01f_m67_001	16	28		0.39085	0.550637		10.3848	9.64478
CON_01f_m67_001	WSP_01f_m67_001	116	32		0.549994	0.670693		12.723	10.356
CON_01f_m67_001	WSP_01f_m67_001	16	28		0.224182	0.421724		10.2742	10.3292
CON_01f_m67_001	WSP_01f_m67_001	44	52		0.719065	0.549108		13.7453	11.3746
CON_01f_m67_001	WSP_01f_m67_001	32	32		0.471918	0.541671		10.4262	9.21206
CON_01f_m67_001	WSP_01f_m67_001	16	60		0.211015	0.675732		9.09155	26.2659
CON_01f_m67_001	WSP_01f_m67_001	48	44		0.483741	0.398734		9.66951	13.5222
CON_01f_m67_001	WSP_01f_m67_001	88	64		0.869056	0.658855		16.8732	14.0292
CON_01f_m67_001	WSP_01f_m67_001	24	28		0.180913	0.509166		9.53123	9.53943
CON_01f_m67_001	WSP_01f_m67_001	76	144		0.763551	0.907797		16.2079	17.5838
CON_01f_m67_001	WSP_01f_m67_001	76	68		0.739974	0.566352		13.9462	13.4197
CON_01f_m67_001	WSP_01f_m67_001	44	144		0.388074	1.07596		12.4433	17.1966
CON_01f_m67_001	WSP_01f_m67_001	60	100		0.363013	0.78437		11.9094	14.5317
CON_01f_m67_001	WSP_01f_m67_001	32	72		0.463891	0.455845		12.2765	16.5423
CON_01f_m67_001	WSP_01f_m67_001	60	68		0.673459	0.78655		15.1713	15.0938
CON_01f_m67_001	WSP_01f_m67_001	52	352		0.907738	1.04015		12.6449	25.0685
CON_01f_m67_001	WSP_01f_m67_001	28	36		0.86081	0.52935		10.3671	13.6017
CON_01f_m67_001	WSP_01f_m67_001	40	28		0.287004	0.517905		12.1169	11.9301
CON_01f_m67_001	WSP_01f_m67_001	20	72		0.643552	0.867644		12.5252	12.9953
CON_01f_m67_001	WSP_01f_m67_002	28	16		0.987146	0.333015		14.6077	7.60724
CON_01f_m67_001	WSP_01f_m67_002	24	20		0.415522	0.179939		9.62491	11.545
CON_01f_m67_001	WSP_01f_m67_002	48	20		0.754199	0.537555		19.1367	11.7495
CON_01f_m67_001	WSP_01f_m67_002	28	20		0.432856	0.709195		10.2863	10.5862
CON_01f_m67_001	WSP_01f_m67_002	56	32		0.758004	0.329566		17.9669	10.9863
CON_01f_m67_002	WSP_01f_m67_002	20	20		0.60051	0.243451		11.4418	8.70324
CON_01f_m67_002	WSP_01f_m67_002	28	40		0.347538	0.577559		5.64082	10.5785
CON_01f_m67_002	WSP_01f_m67_002	160	192		1.15112	0.967771		21.8619	20.0042
CON_01f_m67_002	WSP_01f_m67_002	24	24		0.330753	0.272426		10.4169	11.746
CON_01f_m67_002	WSP_01f_m67_002	28	20		0.550107	0.40137		11.7727	12.3347
CON_01f_m67_002	WSP_01f_m67_002	16	84		0.43053	1.03227		8.40417	18.4005
CON_01f_m67_002	WSP_01f_m67_002	36	20		0.631252	0.74739		10.1786	12.8247
CON_01f_m67_002	WSP_01f_m67_002	20	16		0.16833	0.434633		5.09795	11.4081
CON_01f_m67_002	WSP_01f_m67_002	36	44		0.227722	0.301535		5.64491	16.2568
CON_01f_m67_002	WSP_01f_m67_002	20	60		0.401561	0.391511		11.1211	15.1664
CON_01f_m67_002	WSP_01f_m67_002	32	24		0.663825	0.479843		13.0565	18.9369
CON_01f_m67_002	WSP_01f_m67_002	112	68		0.653019	0.637326		12.7859	13.5118
CON_01f_m67_002	WSP_01f_m67_002	56	300		0.402869	1.27335		10.7128	26.9281
CON_01f_m67_002	WSP_01f_m67_002	112	300		0.740704	1.21101		13.3042	20.8135
CON_01f_m67_002	WSP_01f_m67_002	188	120		0.777485	0.929735		15.7055	13.4937
CON_01f_m67_002	WSP_01f_m67_002	16	16		0.273039	0.429314		7.04957	10.3852
CON_01f_m67_002	WSP_01f_m67_002	140	36		1.09287	0.583286		14.3147	8.54616
CON_01f_m67_002	WSP_01f_m67_002	52	20		0.709305	0.247772		13.2735	7.84291
CON_01f_m67_002	WSP_03f_m67_001	16	60		0.273761	0.490395		11.9867	10.6915
CON_01f_m67_002	WSP_03f_m67_001	36	348		0.39697	0.966755		11.6474	24.5444
CON_01f_m67_002	WSP_03f_m67_001	20	20		0.337058	0.321166		8.90894	9.91411
CON_01f_m67_002	WSP_03f_m67_001	24	36		0.408413	0.377383		11.8967	9.75182
CON_01f_m67_002	WSP_03f_m67_001	16	20		0.424442	0.298368		8.77974	7.93892
CON_01f_m67_002	WSP_03f_m67_001	28	124		0.401126	1.08305		12.588	22.5881
CON_01f_m67_002	WSP_03f_m67_001	32	16		0.339042	0.441867		11.9495	6.91011
CON_01f_m67_002	WSP_03f_m67_001	24	20		0.325576	0.292117		12.4486	10.0818
CON_01f_m67_002	WSP_03f_m67_001	20	68		0.287387	0.606766		10.8686	6.11356
CON_01f_m67_002	WSP_03f_m67_001	16	16		0.205555	0.746657		11.9061	13.1178
CON_01f_m67_002	WSP_03f_m67_001	24	104		0.359711	1.0464		12.2233	16.7849
CON_01f_m67_002	WSP_03f_m67_001	28	40		0.537793	0.41577		14.1819	10.8734
CON_01f_m67_002	WSP_03f_m67_001	24	108		0.393245	0.799725		12.9832	15.9714
CON_01f_m67_002	WSP_03f_m67_001	20	52		0.451497	0.762025		9.37649	11.086
CON_01f_m67_002	WSP_03f_m67_001	60	116		0.504068	1.03256		13.8787	14.1589
CON_01f_m67_002	WSP_03f_m67_001	64	24		0.486923	0.982225		7.72655	7.18195
CON_01f_m67_002	WSP_03f_m67_001	48	20		0.504399	0.28393		15.1625	10.8074
CON_01f_m67_002	WSP_03f_m67_001	144	108		0.830652	0.768001		13.0223	13.2233
CON_01f_m67_002	WSP_03f_m67_001	196	56		0.850795	0.708336		13.4678	11.1533
CON_01f_m67_002	WSP_03f_m67_001	144	60		1.23354	0.551395		15.6712	14.9253
CON_01f_m67_002	WSP_03f_m67_001	20	44		0.319143	0.661932		8.73087	11.5032
CON_01f_m67_003	WSP_03f_m67_001	96	20		1.50709	0.463203		21.6446	11.5175
CON_01f_m67_003	WSP_03f_m67_001	28	44		0.631623	0.590812		39.3251	12.5395
CON_01f_m67_003	WSP_03f_m67_001	16	52		0.689325	0.516392		11.2211	11.5088
CON_01f_m67_003	WSP_03f_m67_001	32	28		0.542197	0.615697		19.4754	10.2513
CON_01f_m67_003	WSP_03f_m67_001	32	44		0.647155	0.430946		11.9302	10.1734
CON_01f_m67_003	WSP_03f_m67_001	32	44		0.807106	0.474498		13.3738	6.41563
CON_01f_m67_003	WSP_03f_m67_001	80	156		1.22949	1.35846		16.2069	10.5326
CON_01f_m67_003	WSP_03f_m67_001	56	44		0.745288	0.679657		13.8419	6.62499
CON_01f_m67_003	WSP_03f_m67_001	44	16		1.48909	0.354825		13.9863	9.8039
CON_01f_m67_003	WSP_03f_m67_001	16	20		0.202098	0.452414		13.6441	10.4196
CON_01f_m67_003	WSP_03f_m67_001	48	172		1.30103	1.0893		14.8033	15.4154
CON_01f_m67_003	WSP_03f_m67_001	56	16		0.775194	0.339419		18.8053	9.15926
CON_01f_m67_003	WSP_03f_m67_001	56	20		0.732897	0.481386		14.5456	12.168
CON_01f_m67_003	WSP_03f_m67_001	20	20		0.486071	0.380788		15.3285	11.9196
CON_01f_m67_003	WSP_03f_m67_001	44	16		0.816355	0.489395		12.1739	5.40842
CON_01f_m67_003	WSP_03f_m67_001	116	36		1.06996	0.49254		23.2399	9.80745
CON_01f_m67_003	WSP_03f_m67_001	116	32		0.770559	0.567511		13.3192	11.1415
CON_01f_m67_003	WSP_03f_m67_001	16	16		0.116469	0.4774		12.0809	9.69876
CON_01f_m67_003	WSP_03f_m67_001	100	72		1.01974	0.805291		19.3096	15.3401
CON_01f_m67_003	WSP_03f_m67_001	48	20		0.906158	0.349746		15.6798	10.9365
CON_01f_m67_003	WSP_03f_m67_001	24	40		0.514907	0.455972		10.0913	10.3233
CON_01f_m67_003	WSP_03f_m67_001	16	16		0.799131	0.583154		13.0896	13.7816
CON_01f_m67_003	WSP_03f_m67_001	36	24		0.968016	0.353849		15.4341	10.0924
CON_01f_m67_003	WSP_03f_m67_001	92	40		0.910934	0.825923		14.6697	13.0913
CON_01f_m67_003	WSP_03f_m67_001	56	20		1.18349	0.331099		18.4053	5.92108
CON_01f_m67_003	WSP_03f_m67_001	28	92		0.535273	0.716911		12.9595	12.313
CON_01f_m67_003	WSP_03f_m67_001	80	16		1.7731	0.211298		18.2399	10.3209
CON_01f_m67_003	WSP_03f_m67_001	28	72		0.428249	0.643092		11.1079	8.39423
CON_01f_m67_003	WSP_03f_m67_001	84	20		1.42105	0.289069		18.8729	9.17204
CON_01f_m67_003	WSP_03f_m67_001	28	20		0.426506	0.336		14.9401	11.9428
CON_01f_m67_003	WSP_03f_m67_001	20	20		0.667788	0.512594		12.0138	9.77829
CON_01f_m67_003	WSP_03f_m67_001	16	16		0.538681	0.12864		17.1228	9.25377
CON_01f_m67_003	WSP_03f_m67_001	28	32		0.521346	0.410074		12.3565	12.1527
CON_01f_m67_003	WSP_03f_m67_001	152	52		1.1205	0.516893		21.6818	9.42632
CON_01f_m67_003	WSP_03f_m67_002	52	48		1.03031	0.651043		17.8034	12.537
CON_01f_m67_003	WSP_03f_m67_002	28	16		0.572197	0.0665106		12.7705	8.95309
CON_01f_m67_003	WSP_03f_m67_002	32	24		0.341182	0.293026		15.8209	8.91051
CON_01f_m67_003	WSP_03f_m67_002	28	28		0.886586	0.393722		26.3837	10.1659
CON_01f_m67_003	WSP_03f_m67_002	24	52		0.490536	0.45431		11.2159	10.1103
CON_01f_m67_003	WSP_03f_m67_002	20	16		0.630516	0.207491		12.5207	9.85141
CON_01f_m67_003	WSP_03f_m67_002	48	16		0.799006	0.388346		17.2246	13.5038
CON_01f_m67_003	WSP_03f_m67_002	16	20		0.194057	0.272544		10.0536	10.8941
CON_01f_m67_003	WSP_03f_m67_002	28	120		0.833403	0.796936		15.4467	13.7376
CON_01f_m67_003	WSP_03f_m67_002	32	16		0.664987	0.242078		13.2766	10.5115
CON_01f_m67_003	WSP_03f_m67_002	28	48		0.525022	0.684021		13.8671	13.0828
CON_01f_m67_003	WSP_03f_m67_002	100	24		1.39616	0.459747		16.4297	12.9332
CON_01f_m67_003	WSP_03f_m67_002	20	24		0.21806	0.484068		12.1195	15.5571
CON_01f_m67_003	WSP_03f_m67_002	28	16		0.793462	0.393479		16.2295	9.8116
CON_01f_m67_003	WSP_03f_m67_002	24	16		0.676785	0.251239		11.9616	11.442
CON_01f_m67_003	WSP_03f_m67_002	56	16		0.869699	0.213903		16.6312	11.5095
CON_01f_m67_003	WSP_03f_m67_002	52	32		0.613503	0.348735		16.5602	14.2354
CON_01f_m67_003	WSP_03f_m67_002	16	36		0.30943	0.400798		13.1691	10.169
CON_01f_m67_003	WSP_03f_m67_002	56	36		0.78937	0.417637		12.8314	10.0297
CON_01f_m67_003	WSP_03f_m67_002	36	64		0.634106	0.397843		14.4497	12.3556
CON_01f_m67_003	WSP_03f_m67_002	16	364		0.55525	0.889622		14.0071	23.0594
CON_01f_m67_003	WSP_03f_m67_002	24	16		0.404937	0.769561		12.6006	9.80549
CON_01f_m67_003	WSP_03f_m67_002	68	60		0.7832	0.965033		16.6808	11.5719
CON_01f_m67_003	WSP_03f_m67_002	16	40		0.252771	0.7884		13.3901	11.6821
CON_01f_m67_003	WSP_03f_m67_003	20	32		0.631494	0.70152		11.6335	9.85532
CON_01f_m67_003	WSP_03f_m67_003	20	72		0.237617	0.838569		12.5736	12.3713
CON_01f_m67_003	WSP_03f_m67_003	28	40		0.538849	0.514944		13.7759	11.3166
CON_01f_m67_003	WSP_03f_m67_003	56	28		0.857727	1.02332		16.6344	10.7168
CON_01f_m67_003	WSP_03f_m67_003	16	24		0.337529	0.414585		9.33786	10.1786
CON_01f_m67_003	WSP_03f_m67_003	32	144		0.583973	0.880977		13.92	12.9119
CON_01f_m67_003	WSP_03f_m67_003	36	80		0.667098	0.76803		15.9648	23.0189
CON_01f_m67_003	WSP_03f_m67_003	28	32		0.85204	0.337297		23.7541	17.7718
CON_01f_m67_003	WSP_03f_m67_003	16	44		0.285422	0.951715		12.9871	13.5626
CON_01f_m67_003	WSP_03f_m67_003	96	20		0.857083	0.555404		16.7559	15.7295
CON_02f_m67_002	WSP_03f_m67_003	284	28		1.00167	0.573422		20.3704	12.9058
CON_02f_m67_002	WSP_03f_m67_003	40	28		0.620698	0.407444		16.0379	15.767
CON_02f_m67_002	WSP_03f_m67_003	32	208		0.25438	1.17713		10.3121	25.6455
CON_02f_m67_002	WSP_03f_m67_003	76	44		0.794514	0.887997		15.9499	17.5185
CON_02f_m67_002	WSP_03f_m67_003	52	24		0.923149	0.725202		17.0872	16.5274
CON_02f_m67_002	WSP_03f_m67_003	56	60		0.734559	0.549282		15.9248	26.4369
CON_02f_m67_002	WSP_03f_m67_003	36	68		0.524137	0.661048		13.1637	14.9977
CON_02f_m67_002	WSP_04f_m67_001	36	52		0.628678	0.56015		15.6857	13.307
CON_02f_m67_002	WSP_04f_m67_001	16	112		0.357047	0.703371		14.7398	14.0858
CON_02f_m67_002	WSP_04f_m67_001	20	180		0.247279	0.896654		15.9693	14.5735
CON_02f_m67_002	WSP_04f_m67_001	204	48		1.07485	0.806957		19.2078	15.004
CON_02f_m67_002	WSP_04f_m67_001	16	96		0.424271	0.779239		9.6201	16.1731
CON_02f_m67_002	WSP_04f_m67_001	20	20		0.495979	0.447501		13.4409	9.52209
CON_02f_m67_002	WSP_04f_m67_001	76	72		0.662077	0.840901		12.0658	13.6482
CON_02f_m67_002	WSP_04f_m67_001	16	68		0.226877	0.779963		13.0176	12.0276
CON_02f_m67_002	WSP_04f_m67_001	16	32		0.653735	0.811224		11.8402	10.3788
CON_02f_m67_002	WSP_04f_m67_001	32	108		0.500009	0.692118		11.0111	11.8111
CON_03f_m67_001	WSP_04f_m67_001	264	24		0.854265	0.260726		20.2478	9.39468
CON_03f_m67_001	WSP_04f_m67_001	40	40		0.485183	0.452039		15.9444	11.189
CON_03f_m67_001	WSP_04f_m67_001	32	148		0.401689	0.729094		10.7753	16.704
CON_03f_m67_001	WSP_04f_m67_001	16	84		0.602823	0.722528		14.2884	13.2698
CON_03f_m67_001	WSP_04f_m67_001	28	28		0.443442	0.451905		11.1188	11.7545
CON_03f_m67_001	WSP_04f_m67_001	80	344		0.518715	1.33756		12.6263	22.2026
CON_03f_m67_001	WSP_04f_m67_001	40	16		0.661662	0.603107		11.2963	10.9586
CON_03f_m67_001	WSP_04f_m67_001	68	64		0.807751	0.708337		14.6976	11.4277
CON_03f_m67_001	WSP_04f_m67_001	24	56		0.446226	0.841183		9.86935	14.4693
CON_03f_m67_001	WSP_04f_m67_001	136	256		0.848697	1.20155		13.7049	23.0995
CON_03f_m67_001	WSP_04f_m67_001	16	132		0.471581	1.09821		9.60427	21.1404
CON_03f_m67_001	WSP_04f_m67_001	44	216		0.624937	1.06603		11.8243	22.0086
CON_03f_m67_001	WSP_04f_m67_002	32	60		0.367393	0.621029		12.471	17.1568
CON_03f_m67_001	WSP_04f_m67_002	16	16		0.633986	0.152653		12.9323	12.2813
CON_03f_m67_001	WSP_04f_m67_002	16	32		0.588178	0.366654		9.91459	11.601
CON_03f_m67_001	WSP_04f_m67_002	40	28		0.330196	0.640352		11.4825	11.0096
CON_03f_m67_001	WSP_04f_m67_002	24	16		0.224623	0.0724874		9.89445	10.9675
CON_03f_m67_001	WSP_04f_m67_003	24	48		0.587908	0.409504		12.0142	11.0629
CON_03f_m67_001	WSP_04f_m67_003	20	32		0.172374	0.539095		8.95016	10.3347
CON_03f_m67_001	WSP_04f_m67_003	32	16		0.263666	0.190391		10.7641	9.61239
CON_03f_m67_001	WSP_04f_m67_003	20	32		0.236877	0.382543		8.54035	11.813
CON_03f_m67_001	WSP_04f_m67_003	68	64		0.621479	0.751251		10.9428	17.3623
CON_03f_m67_001	WSP_04f_m67_003	16	36		0.622991	0.399241		10.201	12.0388
CON_03f_m67_001	WSP_04f_m67_003	40	24		0.785888	0.303374		11.5887	11.2974
CON_03f_m67_001	WSP_04f_m67_003	16	28		0.643262	0.415154		12.6263	12.8935
CON_03f_m67_001	WSP_04f_m67_003	136	28		1.33404	0.255886		14.9403	10.2173
CON_03f_m67_001	WSP_04f_m67_003	52	76		0.691074	0.780095		13.641	13.6466
CON_03f_m67_001	WSP_04f_m67_003	104	16		0.874228	0.932093		12.7693	13.2639
CON_03f_m67_001	WSP_04f_m67_003	16	24		0.230557	0.202645		9.84734	12.671
CON_03f_m67_001	WSP_04f_m67_003	16	48		0.111036	0.394817		10.7131	14.0003
CON_03f_m67_001	WSP_04f_m67_003	104	28		1.02852	0.444937		17.5888	14.0814
CON_03f_m67_001	WSP_04f_m67_003	116	36		0.558157	0.627868		12.7821	12.9308
CON_03f_m67_001	WSP_04f_m67_003	24	16		0.330785	0.418111		12.7525	13.354
CON_03f_m67_001	WSP_04f_m67_003	32	20		0.658685	0.239706		12.6978	12.9523
CON_03f_m67_001	WSP_04f_m67_003	88	16		1.62991	0.157558		22.2775	12.5208
CON_03f_m67_001	WSP_04f_m67_003	84	96		0.838231	0.608356		18.7028	14.0252
CON_03f_m67_001	WSP_04f_m67_003	16	20		0.263006	0.69695		9.22754	13.2831
CON_03f_m67_001	WSP_04f_m67_003	48	20		0.682462	0.33418		12.2957	10.4937
CON_03f_m67_001	WSP_04f_m67_003	24	24		0.265776	0.52308		11.7606	10.1417
CON_03f_m67_001	WSP_04f_m67_003	44	84		0.536009	0.674499		13.2093	11.1128
CON_03f_m67_001	WSP_04f_m67_003	20	24		0.36498	0.272519		9.80174	9.75543
CON_03f_m67_001	WSP_04f_m67_003	16	100		0.423327	0.600123		9.84017	12.0538
CON_03f_m67_001	WSP_04f_m67_003	16	76		0.309775	0.991208		11.8298	11.6482
CON_03f_m67_001	WSP_05f_m67_001	36	48		0.709454	0.880966		10.5313	11.8862
CON_03f_m67_001	WSP_05f_m67_001	16	40		0.562874	0.406592		9.94057	10.0616
CON_03f_m67_001	WSP_05f_m67_001	20	20		0.493059	0.452682		11.3632	10.7791
CON_03f_m67_001	WSP_05f_m67_001	20	84		0.361779	0.883534		11.1751	12.0691
CON_03f_m67_001	WSP_05f_m67_001	72	48		0.744097	0.690701		14.3822	12.3506
CON_03f_m67_001	WSP_05f_m67_001	48	20		0.528393	0.654941		12.2215	10.7466
CON_03f_m67_001	WSP_05f_m67_001	24	32		0.395374	0.439005		12.6469	8.93973
CON_03f_m67_001	WSP_05f_m67_001	28	28		0.653087	0.615483		13.1673	11.9404
CON_03f_m67_001	WSP_05f_m67_001	24	68		0.313174	1.00362		11.6474	12.6713
CON_03f_m67_001	WSP_05f_m67_001	24	224		0.561842	0.938598		14.3012	43.5238
CON_03f_m67_001	WSP_05f_m67_001	28	32		0.61515	0.65613		11.7426	9.17217
CON_03f_m67_001	WSP_05f_m67_001	24	16		0.315616	0.541606		11.3862	9.06798
CON_03f_m67_001	WSP_05f_m67_001	40	56		0.57986	0.894192		12.2571	10.6703
CON_03f_m67_001	WSP_05f_m67_001	24	164		0.209921	0.874844		11.2625	14.0867
CON_03f_m67_001	WSP_05f_m67_001	20	16		0.304572	0.408734		12.071	9.34273
CON_03f_m67_001	WSP_05f_m67_001	36	16		0.579558	0.676503		10.0728	12.4028
CON_03f_m67_001	WSP_05f_m67_001	32	20		0.330135	0.396147		10.7588	10.5574
CON_03f_m67_001	WSP_05f_m67_001	32	20		0.197115	0.44836		13.3742	13.4385
CON_03f_m67_001	WSP_05f_m67_001	24	36		0.313238	0.323816		11.2616	12.1923
CON_03f_m67_001	WSP_05f_m67_001	32	56		0.373861	0.555028		11.3179	11.5818
CON_03f_m67_001	WSP_05f_m67_001	24	16		0.542691	0.279935		12.8605	9.067
CON_03f_m67_001	WSP_05f_m67_001	24	16		0.312921	0.677385		13.0855	13.2648
CON_03f_m67_001	WSP_05f_m67_001	20	16		0.18284	0.708932		11.7233	8.47997
CON_03f_m67_001	WSP_05f_m67_001	28	60		0.974831	1.00813		15.0499	12.1768
CON_03f_m67_001	WSP_05f_m67_001	24	20		0.749021	0.362557		13.1446	9.54237
CON_03f_m67_001	WSP_05f_m67_001	24	36		0.607967	0.551666		12.3383	10.6139
CON_03f_m67_001	WSP_05f_m67_001	24	24		0.301367	0.59872		14.329	9.78529
CON_03f_m67_001	WSP_05f_m67_001	24	56		0.504024	0.673093		13.2023	9.50331
CON_03f_m67_001	WSP_05f_m67_001	16	16		0.170065	0.362148		9.52644	10.7885
CON_03f_m67_001	WSP_05f_m67_001	20	28		0.497998	0.871521		10.5263	11.5843
CON_03f_m67_001	WSP_05f_m67_001	16	16		0.388885	0.231295		7.55405	11.6478
CON_03f_m67_001	WSP_05f_m67_001	340	20		1.22316	0.415524		20.7738	10.0634
CON_03f_m67_001	WSP_05f_m67_001	72	88		0.756001	0.634943		14.8554	33.6092
CON_03f_m67_001	WSP_05f_m67_001	56	28		0.802138	0.921712		16.5076	13.0526
CON_03f_m67_001	WSP_05f_m67_001	64	36		1.16979	0.585863		25.03	11.8746
CON_03f_m67_001	WSP_05f_m67_001	120	16		1.08147	0.197563		17.2116	10.7998
CON_03f_m67_001	WSP_05f_m67_001	36	20		0.210663	0.352124		13.5732	8.91919
CON_03f_m67_001	WSP_05f_m67_001	40	36		0.909158	0.782747		18.1052	14.8869
CON_03f_m67_001	WSP_05f_m67_001	32	24		0.610651	0.512776		15.7403	13.4349
CON_03f_m67_001	WSP_05f_m67_001	48	100		0.940704	1.06786		14.5383	15.2547
CON_03f_m67_001	WSP_05f_m67_001	136	16		0.594458	0.246733		30.2802	9.82229
CON_03f_m67_001	WSP_05f_m67_001	52	24		0.586763	0.334631		12.3213	10.4592
CON_03f_m67_001	WSP_05f_m67_001	228	32		0.999479	0.387647		13.761	10.3039
CON_03f_m67_001	WSP_05f_m67_001	84	28		0.691356	0.809377		11.9524	16.1945
CON_03f_m67_001	WSP_05f_m67_001	76	28		0.638503	0.420654		18.1163	10.2861
CON_03f_m67_001	WSP_05f_m67_001	56	16		1.04547	0.972008		18.8256	11.6638
CON_03f_m67_001	WSP_05f_m67_001	24	16		0.369164	0.485148		10.1104	12.6453
CON_03f_m67_001	WSP_05f_m67_001	68	20		0.983528	0.311128		20.3325	8.80483
CON_03f_m67_001	WSP_05f_m67_001	24	32		0.624723	0.341879		15.2942	13.0077
CON_03f_m67_001	WSP_05f_m67_001	16	152		0.379112	1.26801		8.63047	23.0486
CON_03f_m67_001	WSP_05f_m67_002	20	56		0.457143	0.628288		8.97189	11.5519
CON_03f_m67_001	WSP_05f_m67_002	40	124		1.17143	0.925847		13.3138	12.8891
CON_03f_m67_001	WSP_05f_m67_002	48	68		0.700169	0.919581		13.5525	10.9784
CON_03f_m67_001	WSP_05f_m67_002	16	24		0.260991	0.330234		9.51567	8.99096
CON_03f_m67_001	WSP_05f_m67_002	44	20		0.748642	0.183261		12.6824	9.14163
CON_03f_m67_001	WSP_05f_m67_002	16	60		0.433996	0.496839		7.63952	11.669
CON_03f_m67_001	WSP_05f_m67_002	32	16		0.606041	0.123852		12.2382	9.263
CON_03f_m67_001	WSP_05f_m67_002	44	52		0.619804	0.562658		9.64357	11.1512
CON_03f_m67_001	WSP_05f_m67_002	20	184		0.433211	0.883161		10.125	15.5538
CON_03f_m67_001	WSP_05f_m67_002	16	48		0.307143	0.576299		7.96211	11.8037
CON_03f_m67_001	WSP_05f_m67_002	104	116		0.894567	0.817593		13.4806	16.664
CON_03f_m67_001	WSP_05f_m67_002	64	20		1.03229	0.59869		18.9204	8.72286
CON_03f_m67_001	WSP_05f_m67_002	28	28		0.483344	0.644245		13.2241	9.38959
CON_03f_m67_001	WSP_05f_m67_002	16	36		0.260215	0.62573		8.86955	7.05903
CON_03f_m67_001	WSP_05f_m67_002	76	16		1.03751	0.149943		19.0429	9.56932
CON_03f_m67_001	WSP_06f_m67_001	24	124		0.709033	1.06433		15.0953	15.1078
CON_03f_m67_001	WSP_06f_m67_001	20	364		0.756602	0.966164		10.5475	33.4271
CON_03f_m67_001	WSP_06f_m67_001	28	20		0.582737	0.784345		12.1318	12.4663
CON_03f_m67_001	WSP_06f_m67_001	60	28		1.08909	0.592423		14.3335	13.0236
CON_03f_m67_001	WSP_06f_m67_001	32	28		0.624042	0.551434		12.3933	10.7446
CON_03f_m67_001	WSP_06f_m67_001	44	20		0.493396	0.28239		15.1087	8.53138
CON_03f_m67_001	WSP_06f_m67_001	36	60		0.634386	1.02001		14.3254	13.6986
CON_03f_m67_001	WSP_06f_m67_001	88	56		0.981722	0.528435		15.8766	15.2425
CON_03f_m67_001	WSP_06f_m67_001	24	20		0.783523	0.313688		10.2407	11.0096
CON_03f_m67_001	WSP_06f_m67_001	40	24		0.816573	0.827708		11.553	9.70607
CON_03f_m67_001	WSP_06f_m67_001	44	56		0.753687	0.553588		14.5598	12.2908
CON_03f_m67_001	WSP_06f_m67_001	104	20		1.08174	0.659072		17.3957	10.8507
CON_03f_m67_001	WSP_06f_m67_001	32	16		0.311654	0.505662		9.37963	9.65954
CON_03f_m67_001	WSP_06f_m67_001	16	16		0.709523	0.596286		11.3504	12.8444
CON_03f_m67_001	WSP_06f_m67_001	24	48		0.164938	0.615616		11.4217	20.9726
CON_03f_m67_001	WSP_06f_m67_001	36	56		0.409653	0.602189		9.74855	12.1012
CON_03f_m67_001	WSP_06f_m67_001	44	32		0.701134	0.468782		11.9973	10.1351
CON_03f_m67_001	WSP_06f_m67_001	48	48		0.865327	0.688469		14.634	12.2234
CON_03f_m67_001	WSP_06f_m67_001	44	20		0.703721	0.210561		13.4807	13.1907
CON_03f_m67_001	WSP_06f_m67_001	32	20		0.344276	0.232516		12.3545	9.72567
CON_03f_m67_001	WSP_06f_m67_001	48	28		0.66094	0.607159		9.27992	11.4508
CON_03f_m67_001	WSP_06f_m67_001	20	16		0.441502	0.581897		11.3057	8.5216
CON_03f_m67_001	WSP_06f_m67_001	128	16		0.793082	0.204093		13.8677	7.90075
CON_03f_m67_001	WSP_06f_m67_001	44	48		1.04321	0.834169		16.6122	14.187
CON_03f_m67_001	WSP_06f_m67_001	164	64		1.18015	0.887911		15.9771	14.5969
CON_03f_m67_001	WSP_06f_m67_001	36	16		0.567564	0.247939		10.8896	9.05624
CON_03f_m67_001	WSP_06f_m67_001	28	44		0.638294	0.540424		14.5229	12.4207
CON_03f_m67_001	WSP_06f_m67_001	76	36		0.744406	0.568003		13.1904	9.72066
CON_03f_m67_001	WSP_06f_m67_001	16	28		0.165601	0.543027		9.14408	10.1126
CON_03f_m67_001	WSP_06f_m67_001	16	16		0.381363	0.130828		12.432	10.855
CON_03f_m67_001	WSP_06f_m67_001	64	16		0.497016	0.341221		12.4995	9.89708
CON_03f_m67_001	WSP_06f_m67_001	20	28		0.823556	0.558297		14.9066	10.3823
CON_03f_m67_001	WSP_06f_m67_001	40	336		0.538045	1.23339		11.8056	24.1648
CON_03f_m67_001	WSP_06f_m67_001	20	96		0.520274	0.946786		11.3436	17.1715
CON_03f_m67_001	WSP_06f_m67_001	16	16		0.392726	0.411941		9.75914	12.3223
CON_03f_m67_001	WSP_06f_m67_001	140	212		1.3725	1.10261		24.2227	17.4381
CON_03f_m67_001	WSP_06f_m67_001	32	28		0.34714	0.828078		11.3211	12.4855
CON_03f_m67_001	WSP_06f_m67_001	52	104		1.18703	1.03723		12.6456	16.7071
CON_03f_m67_001	WSP_06f_m67_001	16	176		0.238599	1.19667		11.2519	19.9607
CON_03f_m67_001	WSP_06f_m67_001	120	116		1.40572	1.0079		17.4864	16.9409
CON_03f_m67_001	WSP_06f_m67_001	140	32		0.958981	0.683815		19.7948	10.9663
CON_03f_m67_001	WSP_06f_m67_001	44	24		0.852729	0.415245		11.7403	10.218
CON_03f_m67_001	WSP_06f_m67_001	20	76		0.691122	0.651807		11.3004	16.9156
CON_03f_m67_001	WSP_06f_m67_001	16	236		0.427242	1.67013		9.44689	22.2841
CON_03f_m67_001	WSP_06f_m67_001	72	96		1.1037	0.680495		12.215	13.8741
CON_03f_m67_001	WSP_06f_m67_001	32	24		0.640888	0.437251		11.144	13.7693
CON_03f_m67_001	WSP_06f_m67_001	20	16		0.422064	0.143479		11.0831	12.691
CON_03f_m67_001	WSP_06f_m67_001	20	36		0.220779	0.689845		10.5816	10.748
CON_03f_m67_001	WSP_06f_m67_001	20	48		0.621477	0.985574		19.4603	12.0775
CON_03f_m67_001	WSP_06f_m67_001	40	64		0.680949	0.836243		12.6532	17.2594
CON_03f_m67_001	WSP_06f_m67_001	124	16		0.804066	0.44155		15.2367	12.1501
CON_03f_m67_001	WSP_06f_m67_001	52	24		0.459208	0.669786		11.5177	13.9708
CON_03f_m67_001	WSP_06f_m67_001	24	24		0.545557	0.28363		11.2976	13.3645
CON_03f_m67_002	WSP_06f_m67_001	60	20		0.648746	0.453859		12.2996	15.0941
CON_03f_m67_002	WSP_06f_m67_001	28	124		0.472629	0.901529		12.8021	24.6486
CON_03f_m67_002	WSP_06f_m67_001	48	16		1.23384	0.420084		12.6233	12.4945
CON_03f_m67_002	WSP_06f_m67_001	72	148		1.17782	1.19045		15.9374	17.9184
CON_03f_m67_002	WSP_06f_m67_001	52	116		1.09854	0.922307		15.8253	16.5514
CON_03f_m67_002	WSP_06f_m67_001	28	52		0.792446	0.669367		11.2231	15.3046
CON_03f_m67_002	WSP_06f_m67_002	84	24		1.30652	0.250288		15.879	14.0924
CON_03f_m67_002	WSP_06f_m67_002	20	16		0.765469	0.363699		12.4662	9.3371
CON_03f_m67_002	WSP_06f_m67_002	108	24		1.17766	0.475729		14.1075	11.6527
CON_03f_m67_002	WSP_06f_m67_002	56	44		0.712337	0.562511		12.5461	15.6203
CON_03f_m67_002	WSP_06f_m67_002	84	40		1.06884	0.372009		24.6443	12.6966
CON_03f_m67_002	WSP_06f_m67_002	40	24		0.834012	0.52117		12.076	12.1097
CON_03f_m67_002	WSP_06f_m67_002	40	32		0.831561	0.686428		12.0778	15.575
CON_03f_m67_002	WSP_06f_m67_002	64	28		1.01991	0.525696		17.4241	12.8907
CON_03f_m67_002	WSP_06f_m67_002	16	16		1.16858	0.25883		13.3873	12.8412
CON_03f_m67_002	WSP_06f_m67_002	20	120		0.370322	0.861167		13.0878	18.4812
CON_03f_m67_002	WSP_06f_m67_002	28	32		0.510483	0.929182		15.4083	10.1305
CON_03f_m67_002	WSP_06f_m67_002	16	296		0.719198	1.29459		12.0551	24.4505
CON_03f_m67_002	WSP_06f_m67_002	64	16		0.881302	0.430252		14.5277	8.85062
CON_03f_m67_002	WSP_06f_m67_002	124	16		1.25091	0.452762		16.3216	9.02508
CON_03f_m67_002	WSP_06f_m67_002	16	32		0.813068	0.504297		10.2609	12.9026
CON_03f_m67_002	WSP_06f_m67_002	52	76		1.12273	0.959895		19.0056	12.4309
CON_03f_m67_002	WSP_06f_m67_002	40	64		0.513416	0.789684		11.9979	10.5659
CON_03f_m67_002	WSP_06f_m67_002	56	72		1.08922	0.753644		13.7829	13.2954
CON_03f_m67_002	WSP_06f_m67_002	24	60		0.281256	0.652899		11.5182	13.3398
CON_03f_m67_003	WSP_06f_m67_002	20	52		0.726266	0.629857		24.8589	10.4354
CON_03f_m67_003	WSP_06f_m67_002	20	160		0.548054	0.950313		13.484	14.1465
CON_03f_m67_003	WSP_06f_m67_002	48	20		0.697456	0.331636		20.675	10.6505
CON_03f_m67_003	WSP_06f_m67_002	24	20		0.69101	0.722207		14.1201	9.63343
CON_03f_m67_003	WSP_06f_m67_002	60	56		0.511467	0.485137		14.1585	10.2036
CON_03f_m67_003	WSP_06f_m67_002	16	44		0.238877	0.72339		13.1714	10.9305
CON_03f_m67_003	WSP_06f_m67_002	16	104		0.404654	0.951114		14.0214	16.266
CON_03f_m67_003	WSP_06f_m67_002	32	20		0.533917	0.30569		14.5393	9.87314
CON_03f_m67_003	WSP_06f_m67_002	28	20		0.224909	0.859096		12.7911	8.20214
CON_03f_m67_003	WSP_06f_m67_002	16	32		0.118443	0.540146		12.2662	10.1891
CON_03f_m67_003	WSP_06f_m67_002	28	44		0.50928	0.7787		12.5899	13.3052
CON_03f_m67_003	WSP_06f_m67_002	72	16		0.788189	0.281352		14.995	10.4868
CON_03f_m67_003	WSP_06f_m67_002	24	16		0.394223	0.798809		13.3779	11.0026
CON_03f_m67_003	WSP_06f_m67_002	24	20		0.53494	0.357509		13.2784	10.7055
CON_03f_m67_003	WSP_06f_m67_002	24	16		0.19294	0.050353		11.6713	10.2091
CON_03f_m67_003	WSP_06f_m67_002	28	20		0.3192	0.400767		9.64809	11.0353
CON_03f_m67_003	WSP_06f_m67_002	20	116		1.10534	0.652815		16.9647	12.2568
CON_03f_m67_003	WSP_06f_m67_002	324	72		1.30137	0.999469		24.0084	12.9615
CON_03f_m67_003	WSP_06f_m67_002	116	40		0.881969	0.888836		16.6592	10.0799
CON_03f_m67_003	WSP_06f_m67_002	24	24		0.421635	0.662476		10.3188	13.2441
CON_03f_m67_003	WSP_06f_m67_002	24	16		0.614809	0.464025		8.35647	11.2525
CON_03f_m67_003	WSP_06f_m67_002	76	28		0.876266	0.471738		12.655	12.4337
CON_03f_m67_003	WSP_06f_m67_002	24	64		0.568091	0.459684		11.1313	10.8862
CON_03f_m67_003	WSP_06f_m67_002	20	32		0.102643	0.276185		22.5071	10.6427
CON_03f_m67_003	WSP_06f_m67_002	16	24		0.539998	0.333033		10.5101	12.0822
CON_03f_m67_003	WSP_06f_m67_002	28	28		0.360046	0.795601		22.898	10.0326
CON_03f_m67_003	WSP_06f_m67_002	44	16		0.768349	0.421478		13.4651	11.7228
CON_03f_m67_003	WSP_06f_m67_002	56	24		0.780546	0.47636		11.8145	10.3792
CON_03f_m67_003	WSP_06f_m67_002	28	16		0.524609	0.490309		11.3245	11.0882
CON_03f_m67_003	WSP_06f_m67_002	44	40		0.661285	0.651013		10.8155	12.4216
CON_03f_m67_003	WSP_06f_m67_002	40	72		0.730198	0.670714		12.5849	12.6814
CON_03f_m67_003	WSP_06f_m67_002	40	24		0.507766	0.37924		10.0628	11.5104
CON_03f_m67_003	WSP_06f_m67_002	32	68		0.326534	0.715716		10.5131	11.1287
CON_03f_m67_003	WSP_06f_m67_002	20	48		0.317076	0.847186		16.9728	12.2917
CON_03f_m67_003	WSP_06f_m67_002	16	68		0.53204	1.16464		11.0653	15.6903
CON_03f_m67_003	WSP_06f_m67_002	48	64		0.530169	0.91985		12.7682	11.7857
CON_03f_m67_003	WSP_06f_m67_002	16	220		1.06311	1.01762		26.3967	18.891
CON_03f_m67_003	WSP_06f_m67_002	16	24		0.316691	0.451571		8.8814	11.0875
CON_03f_m67_003	WSP_06f_m67_002	48	36		0.599249	0.524645		16.0539	12.7511
CON_03f_m67_003	WSP_06f_m67_002	60	16		0.737323	0.206801		28.8198	10.9361
CON_03f_m67_003	WSP_06f_m67_002	16	48		0.426761	0.585841		11.4296	14.8068
CON_03f_m67_003	WSP_06f_m67_002	32	56		0.785855	0.763533		16.5607	12.2174
CON_03f_m67_003	WSP_06f_m67_002	24	20		0.378561	0.313529		8.32156	11.033
CON_03f_m67_003	WSP_06f_m67_002	24	20		0.206117	0.638232		11.212	11.9605
CON_03f_m67_003	WSP_06f_m67_002	64	36		0.735412	0.520278		14.5996	11.4921
CON_03f_m67_003	WSP_06f_m67_002	60	92		0.789209	0.666395		11.4449	13.0679
CON_03f_m67_003	WSP_06f_m67_002	140	16		1.03801	0.295192		16.0965	10.1167
CON_03f_m67_003	WSP_06f_m67_002	32	32		0.509726	0.790076		11.2215	10.4621
CON_03f_m67_003	WSP_06f_m67_002	68	20		0.731652	0.517535		13.8359	10.5079
CON_03f_m67_003	WSP_06f_m67_002	24	16		0.356074	0.217506		8.21844	11.9414
CON_03f_m67_003	WSP_06f_m67_002	20	48		0.431567	0.745623		9.94002	11.5989
CON_03f_m67_003	WSP_06f_m67_002	16	20		0.374806	0.530584		11.0968	8.12495
CON_03f_m67_003	WSP_06f_m67_002	16	36		0.449671	0.691643		11.042	10.9979
CON_03f_m67_003	WSP_06f_m67_002	24	24		1.15814	0.251887		13.2544	14.5008
CON_03f_m67_003	WSP_06f_m67_002	60	16		0.69294	0.574972		15.5151	9.98901
CON_03f_m67_003	WSP_06f_m67_002	56	20		0.681075	0.348357		11.4089	11.7994
CON_03f_m67_003	WSP_06f_m67_002	16	20		0.437429	0.366794		15.8789	17.8655
CON_03f_m67_003	WSP_06f_m67_002	28	48		0.73782	1.11042		10.8581	12.6981
CON_03f_m67_003	WSP_06f_m67_002	72	108		0.802955	0.843744		15.3311	12.8816
CON_03f_m67_003	WSP_06f_m67_002	36	24		0.766484	0.564155		14.1623	11.0782
CON_03f_m67_003	WSP_06f_m67_002	92	28		1.11223	0.988978		11.932	12.5909
CON_03f_m67_003	WSP_06f_m67_002	28	28		0.420056	0.439628		11.5861	11.2601
CON_03f_m67_003	WSP_06f_m67_002	20	16		0.246756	0.531169		11.1217	11.56
CON_03f_m67_003	WSP_06f_m67_002	24	16		0.35819	0.458844		12.5302	10.0619
CON_03f_m67_003	WSP_06f_m67_002	32	16		0.392749	0.186742		11.951	12.5857
CON_03f_m67_003	WSP_06f_m67_002	24	20		0.332191	0.477008		11.1936	11.5139
CON_03f_m67_003	WSP_06f_m67_002	20	60		0.630281	0.979445		16.2518	16.355
CON_03f_m67_003	WSP_06f_m67_002	16	20		0.212262	0.235904		16.177	11.9103
CON_03f_m67_003	WSP_06f_m67_002	48	52		0.647489	0.490511		11.824	10.7221
CON_03f_m67_003	WSP_06f_m67_002	76	24		0.850121	0.784265		15.1365	8.90305
CON_03f_m67_003	WSP_06f_m67_002	16	32		0.257822	0.290345		9.52726	10.5543
CON_03f_m67_003	WSP_06f_m67_002	16	88		0.742645	0.786988		11.0498	12.7259
CON_03f_m67_003	WSP_06f_m67_002	40	28		0.394086	0.582774		11.2776	13.0491
CON_03f_m67_003	WSP_06f_m67_002	20	20		0.559647	0.81547		13.2837	14.6643
CON_03f_m67_003	WSP_06f_m67_002	28	40		0.503105	0.690576		12.1981	12.0733
CON_03f_m67_003	WSP_06f_m67_002	36	24		0.757611	0.504499		15.6267	10.3483
CON_03f_m67_003	WSP_07f_m67_001	24	32		0.299163	0.612104		13.9272	19.3753
CON_03f_m67_003	WSP_07f_m67_001	48	24		0.368718	0.641698		14.2081	11.8277
CON_03f_m67_003	WSP_07f_m67_001	16	16		0.952817	0.437548		11.6691	11.6727
CON_03f_m67_003	WSP_07f_m67_001	20	28		0.637624	0.382694		15.4738	11.0169
CON_03f_m67_003	WSP_07f_m67_001	16	32		0.530422	0.771086		11.504	11.5727
CON_03f_m67_003	WSP_07f_m67_001	16	20		0.443475	0.749361		10.5364	8.8933
CON_03f_m67_003	WSP_07f_m67_001	16	44		0.151835	0.981233		10.6647	13.1851
CON_03f_m67_003	WSP_07f_m67_001	84	204		0.933229	1.60816		17.5874	17.7012
CON_03f_m67_003	WSP_07f_m67_001	20	44		0.634014	0.709086		12.3405	10.9242
CON_03f_m67_003	WSP_07f_m67_001	28	16		0.817449	0.54226		12.6947	10.047
CON_03f_m67_003	WSP_07f_m67_001	24	28		0.341903	0.694696		16.7649	10.6505
CON_03f_m67_003	WSP_07f_m67_001	24	36		0.819993	0.463727		13.0988	11.2249
CON_03f_m67_003	WSP_07f_m67_001	16	20		0.301985	0.725999		9.90366	16.1486
CON_03f_m67_003	WSP_07f_m67_001	16	24		0.539047	0.666755		28.2498	12.3036
CON_03f_m67_003	WSP_07f_m67_001	16	40		0.205435	0.574894		13.0405	11.2871
CON_03f_m67_003	WSP_07f_m67_001	40	20		0.918083	0.362875		13.4765	11.2347
CON_03f_m67_003	WSP_07f_m67_001	28	28		0.400968	0.47249		11.3733	10.1068
CON_03f_m67_003	WSP_07f_m67_001	88	68		0.581752	0.90274		13.7296	18.4061
CON_03f_m67_003	WSP_07f_m67_001	48	36		0.96952	1.0066		13.2423	13.2211
CON_03f_m67_003	WSP_07f_m67_001	36	16		0.714899	0.191932		20.1996	12.545
CON_03f_m67_003	WSP_07f_m67_001	52	28		0.447286	0.791729		12.7355	14.9522
CON_03f_m67_003	WSP_07f_m67_001	24	56		0.466085	0.670921		12.6589	10.1009
CON_03f_m67_003	WSP_07f_m67_001	28	16		0.451068	0.337298		11.5951	14.4018
CON_03f_m67_003	WSP_07f_m67_001	16	28		0.349161	0.28614		10.4778	13.8896
CON_03f_m67_003	WSP_07f_m67_001	28	72		1.20425	0.896741		23.4908	13.2037
CON_03f_m67_003	WSP_07f_m67_001	16	24		0.37789	0.418789		12.118	11.878
CON_03f_m67_003	WSP_07f_m67_001	32	28		0.341092	0.559954		11.7804	11.4319
CON_03f_m67_003	WSP_07f_m67_001	24	80		0.345084	0.790203		10.8653	15.1654
CON_03f_m67_003	WSP_07f_m67_001	24	36		0.221187	0.72288		11.5672	10.8287
CON_03f_m67_003	WSP_07f_m67_001	52	184		0.555602	1.25281		15.5121	14.4438
CON_03f_m67_003	WSP_07f_m67_001	20	16		0.434776	0.435336		10.687	10.8417
CON_03f_m67_003	WSP_07f_m67_001	20	28		0.559337	1.0539		10.0049	12.1629
CON_03f_m67_003	WSP_07f_m67_001	32	16		0.493774	0.522156		12.5887	14.0336
CON_03f_m67_003	WSP_07f_m67_001	24	16		0.659044	0.336857		13.3241	10.4561
CON_05f_m67_001	WSP_07f_m67_001	72	32		0.59709	0.488531		12.8285	15.3718
CON_05f_m67_001	WSP_07f_m67_001	56	48		0.887902	0.585609		15.2181	16.8423
CON_05f_m67_001	WSP_07f_m67_001	56	28		0.829753	0.660202		13.6223	17.054
CON_05f_m67_001	WSP_07f_m67_001	128	16		1.34942	0.371971		18.5915	11.6119
CON_05f_m67_001	WSP_07f_m67_001	92	60		1.00197	1.1098		18.3441	15.3663
CON_05f_m67_001	WSP_07f_m67_001	32	88		0.414488	0.884985		9.4499	15.0073
CON_05f_m67_001	WSP_07f_m67_001	168	56		1.20363	0.760368		14.945	14.5864
CON_05f_m67_001	WSP_07f_m67_001	20	20		0.665027	0.847693		9.76733	15.301
CON_05f_m67_001	WSP_07f_m67_001	20	40		0.460892	0.839691		9.75903	12.492
CON_05f_m67_001	WSP_07f_m67_001	44	20		0.618277	0.422393		10.135	11.7569
CON_05f_m67_001	WSP_07f_m67_001	16	20		0.362712	0.762557		10.0204	13.749
CON_05f_m67_001	WSP_07f_m67_001	72	28		1.32789	0.574185		13.7541	13.1786
CON_05f_m67_001	WSP_07f_m67_001	16	16		0.402274	0.340076		10.4749	15.505
CON_05f_m67_001	WSP_07f_m67_001	80	16		1.09423	0.503971		16.4039	11.8813
CON_05f_m67_001	WSP_07f_m67_001	124	232		0.910563	1.43573		17.4112	16.802
CON_05f_m67_001	WSP_07f_m67_001	44	236		0.599465	1.79447		12.7227	20.5018
CON_05f_m67_001	WSP_07f_m67_001	24	20		0.449337	0.573728		12.5089	10.7928
CON_05f_m67_001	WSP_07f_m67_001	16	20		0.514793	0.55661		11.3873	7.90509
CON_05f_m67_001	WSP_07f_m67_002	16	32		0.574334	0.836121		9.80029	10.8801
CON_05f_m67_001	WSP_07f_m67_002	72	16		0.700752	0.190966		14.6717	10.5891
CON_05f_m67_001	WSP_07f_m67_002	76	24		0.839501	0.716267		14.0775	14.182
CON_05f_m67_001	WSP_07f_m67_002	48	28		1.02081	0.867205		11.9306	11.2225
CON_05f_m67_001	WSP_07f_m67_002	64	24		0.893099	0.834562		15.5785	9.41486
CON_05f_m67_001	WSP_07f_m67_002	20	64		0.387389	1.02792		10.4171	16.3025
CON_05f_m67_001	WSP_07f_m67_002	24	64		0.414399	0.969479		11.4218	11.165
CON_05f_m67_001	WSP_07f_m67_002	84	188		0.614325	1.39724		12.2488	16.0028
CON_05f_m67_001	WSP_07f_m67_002	100	64		0.961084	1.04802		13.018	14.707
CON_05f_m67_001	WSP_07f_m67_002	24	32		0.298363	0.758036		10.6821	9.95362
CON_05f_m67_001	WSP_07f_m67_002	40	16		0.662971	0.790684		12.4605	13.122
CON_05f_m67_001	WSP_07f_m67_002	28	16		0.749606	0.223172		13.2579	10.1639
CON_05f_m67_001	WSP_07f_m67_002	44	20		0.738702	0.611717		11.9855	10.0677
CON_05f_m67_001	WSP_07f_m67_002	32	72		0.739065	1.20767		13.0342	14.4696
CON_05f_m67_001	WSP_07f_m67_002	96	16		0.943363	0.3306		18.6387	11.6511
CON_05f_m67_001	WSP_07f_m67_002	68	104		0.920386	1.45892		14.5808	20.2782
CON_05f_m67_001	WSP_07f_m67_002	48	20		0.566415	0.592741		14.1583	11.6766
CON_05f_m67_001	WSP_07f_m67_002	72	20		0.64591	0.508782		15.0823	10.3708
CON_05f_m67_001	WSP_07f_m67_002	80	16		0.689685	0.671455		12.4842	12.677
CON_05f_m67_001	WSP_07f_m67_002	16	20		0.322707	0.49959		11.3258	16.1312
CON_05f_m67_001	WSP_07f_m67_002	60	212		0.96108	1.0795		18.8889	29.744
CON_05f_m67_001	WSP_07f_m67_002	20	16		0.759769	1.01935		10.4637	12.7363
CON_05f_m67_001	WSP_07f_m67_002	32	56		0.452391	0.750118		11.3309	23.9471
CON_05f_m67_001	WSP_07f_m67_002	36	24		0.671999	1.01743		13.4347	8.81126
CON_05f_m67_001	WSP_07f_m67_002	80	24		0.758401	0.703599		15.8773	12.1852
CON_05f_m67_001	WSP_07f_m67_002	20	172		0.458599	1.1847		10.3305	21.1309
CON_05f_m67_001	WSP_07f_m67_002	16	16		0.078782	0.308781		12.8555	11.8493
CON_05f_m67_001	WSP_07f_m67_002	84	128		0.756584	1.18157		12.1671	20.8817
CON_05f_m67_001	WSP_07f_m67_002	24	20		0.337772	0.813042		11.1206	9.17181
CON_05f_m67_001	WSP_07f_m67_002	24	32		0.417985	0.671248		11.0566	9.67482
CON_05f_m67_001	WSP_07f_m67_002	60	40		0.617988	1.20156		12.3495	10.17
CON_05f_m67_001	WSP_07f_m67_003	28	16		0.360395	0.538467		14.8684	7.08921
CON_05f_m67_001	WSP_07f_m67_003	16	48		0.782812	0.519573		17.2077	12.082
CON_05f_m67_001	WSP_07f_m67_003	24	24		0.285205	0.425137		14.3162	10.0688
CON_05f_m67_001	WSP_07f_m67_003	56	20		0.487548	0.359586		13.827	10.5477
CON_05f_m67_001	WSP_07f_m67_003	20	44		0.336918	0.800767		10.6052	11.4496
CON_05f_m67_001	WSP_07f_m67_003	16	16		0.232106	0.609529		11.4678	7.17074
CON_05f_m67_001	WSP_07f_m67_003	36	24		0.944058	0.73985		10.9572	10.9309
CON_05f_m67_001	WSP_07f_m67_003	92	56		1.18445	1.13603		22.5477	11.8977
CON_05f_m67_001	WSP_07f_m67_003	20	20		0.344232	0.491208		13.0897	8.21111
CON_05f_m67_001	WSP_07f_m67_003	28	76		0.548131	0.927004		16.1688	11.7967
CON_05f_m67_001	WSP_07f_m67_003	16	40		0.0593859	0.642471		10.9406	11.68
CON_05f_m67_001	WSP_07f_m67_003	40	16		0.260932	0.338855		15.5348	5.87875
CON_05f_m67_001	WSP_07f_m67_003	20	16		0.183584	0.254724		10.7222	13.9003
CON_05f_m67_001	WSP_07f_m67_003	36	20		0.25054	0.382999		12.5273	12.8654
CON_05f_m67_001	WSP_07f_m67_003	24	36		0.43737	0.628364		12.8555	12.7053
CON_05f_m67_001	WSP_07f_m67_003	44	28		0.590052	0.523549		11.348	10.8141
CON_05f_m67_001	WSP_07f_m67_003	44	20		0.769896	0.555563		15.9549	11.0707
CON_05f_m67_001	WSP_07f_m67_003	32	56		0.324853	1.08029		13.541	12.7975
CON_05f_m67_001	WSP_07f_m67_003	36	16		0.458321	0.369345		16.1089	9.66147
CON_05f_m67_001	WSP_07f_m67_003	52	16		0.544836	0.419748		14.7457	12.3716
CON_05f_m67_001	WSP_07f_m67_003	24	24		0.613363	0.305139		16.9537	12.1099
CON_05f_m67_001	WSP_07f_m67_003	48	16		0.768019	0.276007		18.1506	9.76713
CON_05f_m67_001	WSP_07f_m67_003	16	40		0.239091	0.850349		10.8346	6.63934
CON_05f_m67_001	WSP_07f_m67_003	20	20		0.290741	0.723064		15.2807	12.4187
CON_05f_m67_001	WSP_07f_m67_003	48	24		0.7598	0.830283		22.9437	11.7197
CON_05f_m67_001	WSP_07f_m67_003	24	24		0.219913	0.593741		12.4305	10.6295
CON_05f_m67_001	WSP_07f_m67_003	92	32		1.07939	0.90694		15.511	13.048
CON_05f_m67_001	WSP_07f_m67_003	32	32		0.627682	1.01094		21.6855	13.6261
CON_05f_m67_001	WSP_07f_m67_003	16	36		0.348371	0.565147		20.7758	12.5602
CON_05f_m67_001	WSP_07f_m67_003	36	16		0.399589	0.39034		14.5957	15.5857
CON_05f_m67_001	WSP_07f_m67_003	20	48		0.487038	0.765897		12.4	12.9245
CON_05f_m67_001	WSP_07f_m67_003	24	16		0.366174	0.779761		12.4368	10.4655
CON_05f_m67_001	WSP_07f_m67_003	20	116		0.612947	0.856915		16.0502	15.1739
CON_05f_m67_001	WSP_07f_m67_003	16	204		0.198898	1.02911		11.1447	15.3723
CON_05f_m67_002	WSP_07f_m67_003	152	24		1.14612	0.786257		15.379	10.062
CON_05f_m67_002	WSP_07f_m67_003	64	16		0.977743	0.702725		17.2463	8.05587
CON_05f_m67_002		160			1.22664			21.5065
CON_05f_m67_002		44			0.51481			10.5003
CON_05f_m67_002		36			0.497955			14.6584
CON_05f_m67_002		48			0.700842			16.2259
CON_05f_m67_002		184			1.18378			22.9556
CON_05f_m67_002		260			1.24077			19.1793
CON_05f_m67_002		220			1.172			21.9947
CON_05f_m67_002		36			0.735375			12.304
CON_05f_m67_002		24			0.236283			12.7791
CON_05f_m67_002		16			0.385763			8.50584
CON_05f_m67_002		44			0.481346			12.2513
CON_05f_m67_002		40			0.951711			21.2382
CON_05f_m67_002		48			0.564646			17.1008
CON_05f_m67_002		104			0.928309			29.9648
CON_05f_m67_002		16			0.433268			14.1879
CON_05f_m67_002		108			1.15488			21.6373
CON_05f_m67_002		92			0.65242			17.8177
CON_05f_m67_002		24			0.333043			15.7346
CON_05f_m67_002		28			0.511001			9.75097
CON_05f_m67_002		24			0.307495			12.6281
CON_05f_m67_002		44			0.871178			16.0926
CON_05f_m67_002		112			0.971681			18.1758
CON_05f_m67_002		48			0.652053			18.9655
CON_05f_m67_002		104			0.63167			16.4035
CON_05f_m67_002		52			1.01746			14.1581
CON_05f_m67_002		36			0.750723			13.1159
CON_05f_m67_002		52			0.753222			17.031
CON_05f_m67_002		20			0.588247			18.0585
CON_05f_m67_002		16			0.40131			12.3514
CON_05f_m67_002		76			0.557716			16.3101
CON_05f_m67_002		16			0.310056			11.479
CON_05f_m67_002		72			0.786284			18.4161
CON_05f_m67_002		24			0.432395			8.90098
CON_05f_m67_002		56			0.481978			14.3255
CON_05f_m67_002		32			0.444064			14.5275
CON_05f_m67_002		16			0.454856			11.1316
CON_05f_m67_002		16			1.40868			10.341
CON_05f_m67_002		56			0.573327			12.69
CON_05f_m67_002		28			0.423967			15.2336
CON_05f_m67_002		36			0.56252			14.5744
CON_05f_m67_002		24			0.771221			13.5294
CON_05f_m67_002		20			0.647433			13.9021
CON_05f_m67_002		44			0.645817			14.3288
CON_05f_m67_002		24			0.560218			11.6486
CON_06f_m67_001		16			0.396593			12.4645
CON_06f_m67_001		20			0.328086			13.2648
CON_06f_m67_001		20			0.723339			7.9297
CON_06f_m67_001		92			0.986557			22.233
CON_06f_m67_001		16			0.456011			8.98743
CON_06f_m67_001		96			1.13232			16.2792
CON_06f_m67_001		24			0.756891			12.0023
CON_06f_m67_001		60			0.988019			14.2425
CON_06f_m67_001		24			0.676957			15.2278
CON_06f_m67_001		24			2.46353			19.5831
CON_06f_m67_001		204			0.974936			44.2761
CON_06f_m67_001		24			0.452006			13.6336
CON_06f_m67_001		68			0.884857			18.5916
CON_06f_m67_001		44			0.630273			12.1545
CON_06f_m67_001		252			1.95095			24.7429
CON_06f_m67_001		28			0.623424			12.8051
CON_06f_m67_001		196			1.42302			24.8187
CON_06f_m67_001		24			0.440895			10.9221
CON_06f_m67_001		40			0.613064			13.8921
CON_06f_m67_001		56			0.778873			15.7541
CON_06f_m67_001		144			1.45434			18.9579
CON_06f_m67_001		24			0.600301			16.1173
CON_06f_m67_001		76			1.06772			16.605
CON_06f_m67_001		60			1.77864			13.4324
CON_06f_m67_001		24			0.556025			12.1834
CON_06f_m67_001		88			0.604776			15.4407
CON_06f_m67_001		112			1.02826			13.8715
CON_06f_m67_001		36			0.362166			11.5632
CON_06f_m67_001		16			0.578419			13.5433
CON_06f_m67_001		40			0.899372			12.4654
CON_06f_m67_001		20			0.427997			10.2696
CON_06f_m67_001		16			0.389648			13.8282
CON_06f_m67_001		20			0.843446			15.0951
CON_06f_m67_001		356			1.43282			27.4383
CON_06f_m67_001		80			0.666547			16.2903
CON_06f_m67_001		28			0.533052			11.1275
CON_06f_m67_001		16			0.399182			10.5685
CON_06f_m67_001		16			0.75091			13.5883
CON_06f_m67_001		120			0.844386			15.4507
CON_06f_m67_001		20			0.613626			17.5339
CON_06f_m67_001		16			0.23529			12.9265
CON_06f_m67_001		16			0.587973			12.6387
CON_06f_m67_001		24			0.935838			13.2251
CON_06f_m67_001		20			0.400691			13.0121
CON_06f_m67_001		24			1.05732			11.0405
CON_06f_m67_001		48			1.00803			14.3933
CON_06f_m67_001		128			1.34678			19.2907
CON_06f_m67_001		76			0.561669			16.7723
CON_06f_m67_001		40			0.765418			16.4044
CON_06f_m67_001		20			0.721368			14.0669
CON_06f_m67_001		20			0.478545			11.5845
CON_06f_m67_001		20			0.531604			10.7822
CON_06f_m67_001		20			0.50119			13.2068
CON_06f_m67_001		60			0.941108			17.8571
CON_06f_m67_001		16			0.148645			10.8169
CON_06f_m67_001		20			0.601099			13.7966
CON_06f_m67_001		168			1.26155			25.571
CON_06f_m67_001		16			0.462359			9.90222
CON_06f_m67_001		28			0.711719			11.8899
CON_06f_m67_001		16			0.194059			9.68191
CON_06f_m67_001		24			0.825053			12.163
CON_06f_m67_001		64			1.1499			17.1467
CON_06f_m67_001		52			0.831018			12.5449
CON_06f_m67_001		108			1.09842			25.4327
CON_06f_m67_001		16			0.137054			8.67073
CON_06f_m67_001		144			1.22024			17.5059
CON_06f_m67_001		84			1.025			16.9032
CON_06f_m67_001		24			0.391779			12.1346
CON_06f_m67_001		68			0.896093			15.7854
CON_06f_m67_001		60			1.0088			15.038
CON_06f_m67_001		48			1.24985			15.7122
CON_06f_m67_001		28			0.596761			11.5175
CON_06f_m67_001		60			1.30707			14.7133
CON_06f_m67_001		20			0.589183			13.275
CON_06f_m67_001		16			0.447568			12.911
CON_06f_m67_001		60			1.17841			18.6234
CON_06f_m67_001		20			0.258338			20.1273
CON_06f_m67_001		60			0.685228			18.9538
CON_06f_m67_001		20			0.490552			11.1718
CON_06f_m67_001		76			1.005			21.3492
CON_06f_m67_001		24			0.735296			14.0166
CON_06f_m67_001		52			1.08823			15.9956
CON_06f_m67_001		20			0.248064			14.7478
CON_06f_m67_001		32			0.499827			10.9999
CON_06f_m67_001		116			1.16935			28.0901
CON_06f_m67_001		68			0.776822			16.6244
CON_06f_m67_001		60			0.914752			15.3328
CON_06f_m67_001		68			0.83338			19.3216
CON_06f_m67_001		24			0.207736			15.3285
CON_06f_m67_001		72			1.02886			17.4203
CON_06f_m67_001		156			1.17745			25.8799
CON_06f_m67_001		36			0.522689			11.0965
CON_06f_m67_001		32			0.668228			14.7678
CON_06f_m67_001		56			0.88954			17.9801
CON_06f_m67_001		76			0.751183			19.9412
CON_06f_m67_001		80			0.797843			14.7202
CON_06f_m67_001		36			0.866236			15.0863
CON_06f_m67_001		32			1.00754			18.599
CON_06f_m67_001		56			0.69822			14.6387
CON_06f_m67_001		20			0.539484			15.2742
CON_06f_m67_001		16			0.309197			10.58
CON_06f_m67_001		40			0.468197			12.8891
CON_06f_m67_001		44			1.31172			15.8333
CON_06f_m67_001		20			0.719583			12.0803
CON_06f_m67_001		112			0.987729			19.4058
CON_06f_m67_001		20			0.442279			12.2956
CON_06f_m67_001		88			0.595601			18.3432
CON_06f_m67_001		16			0.749674			12.902
CON_06f_m67_001		20			0.111007			12.9244
CON_06f_m67_001		76			0.853864			20.0514
CON_06f_m67_001		16			0.435233			12.576
CON_06f_m67_001		16			0.20155			10.761
CON_06f_m67_001		16			0.568315			10.4516
CON_06f_m67_001		16			0.396337			12.3973
CON_06f_m67_001		68			0.825537			14.4649
CON_06f_m67_001		24			0.443802			13.2881
CON_06f_m67_001		28			0.723894			17.1472
CON_06f_m67_001		28			0.48401			13.7956
CON_06f_m67_001		16			0.338243			12.7768
CON_06f_m67_001		56			1.00501			19.1187
CON_06f_m67_001		60			0.811372			17.4827
CON_06f_m67_001		24			0.486717			12.3869
CON_06f_m67_001		28			0.370456			13.3892
CON_06f_m67_001		68			1.01153			15.7408
CON_06f_m67_001		72			0.890629			17.6941
CON_06f_m67_001		44			1.24572			13.7864
CON_06f_m67_001		64			0.81011			17.981
CON_06f_m67_001		16			0.375572			14.7685
CON_06f_m67_001		48			0.903493			17.2637
CON_06f_m67_001		100			1.04325			17.0727
CON_06f_m67_001		20			0.762949			12.7208
CON_06f_m67_001		28			0.494046			25.6285
CON_06f_m67_001		40			0.773593			14.0827
CON_06f_m67_001		36			0.456294			11.5539
CON_06f_m67_001		16			0.377581			12.8578
CON_06f_m67_001		32			0.640098			14.4638
CON_06f_m67_001		16			0.410783			11.5007
CON_06f_m67_001		16			0.224524			9.73801
CON_06f_m67_001		48			0.717052			18.0016
CON_06f_m67_001		32			0.748475			17.8772
CON_06f_m67_001		32			0.641126			17.6038
CON_06f_m67_001		16			0.153894			10.4446
CON_06f_m67_001		36			0.646703			18.9537
CON_06f_m67_001		24			0.615176			14.2512
CON_06f_m67_001		20			0.489016			16.1623
CON_06f_m67_001		24			0.77199			11.6101
CON_06f_m67_001		24			0.714162			13.248
CON_06f_m67_001		20			0.841618			13.3949
CON_06f_m67_001		24			0.543217			11.412
CON_06f_m67_001		20			0.186575			12.2554
CON_06f_m67_001		100			1.49499			22.2532
CON_06f_m67_001		32			0.527874			18.8256
CON_06f_m67_001		224			1.76274			20.8462
CON_06f_m67_001		84			0.471654			10.9165
CON_06f_m67_001		56			0.80171			12.2781
CON_06f_m67_001		16			0.416472			12.522
CON_06f_m67_001		28			0.592533			11.3641
CON_06f_m67_001		72			0.443851			64.5777
CON_06f_m67_001		32			0.813554			15.0077
CON_06f_m67_001		48			0.494964			26.5865
CON_06f_m67_001		56			0.945022			14.6841
CON_06f_m67_001		68			0.939806			24.4763
CON_06f_m67_001		24			0.658774			11.5031
CON_06f_m67_001		20			0.485237			9.82152
CON_06f_m67_001		24			0.504847			9.70987
CON_06f_m67_001		16			0.309458			9.27676
		16			0.096354
		76			1.19989
		56			0.776067
CON_06f_m67_001		36			1.00472			10.7069
CON_06f_m67_001		24			0.551252			10.2137
CON_06f_m67_001		48			1.04306			19.4082
CON_06f_m67_001		20			0.509342			10.2641
CON_06f_m67_001		16			0.461781			11.2133
CON_06f_m67_001		24			1.00095			10.7971
CON_06f_m67_001		36			0.527945			9.50206
CON_06f_m67_001		64			0.925288			17.7251
CON_06f_m67_001		32			0.95831			18.9873
CON_06f_m67_001		24			0.761709			11.001
CON_06f_m67_001		32			0.489468			10.5253
CON_06f_m67_001		28			1.16528			15.2493
CON_06f_m67_001		20			0.391933			9.97603
CON_06f_m67_001		36			1.1844			15.0331
CON_06f_m67_001		16			0.155861			18.2381
CON_06f_m67_001		60			1.28943			14.7248
CON_06f_m67_001		20			0.607145			11.9089
CON_06f_m67_001		16			0.492753			10.417
CON_06f_m67_001		16			0.254166			10.2589
CON_06f_m67_001		16			0.48743			12.5127
CON_06f_m67_001		24			0.626589			9.90738
CON_06f_m67_001		16			0.11205			11.1108
CON_06f_m67_001		24			0.577856			7.04369
CON_06f_m67_001		72			1.14843			21.9222
CON_06f_m67_001		100			1.08834			16.7678
CON_06f_m67_001		16			0.521869			11.0665
CON_06f_m67_001		16			0.208656			16.5393
CON_06f_m67_001		16			0.37966			10.5725
CON_06f_m67_001		20			0.34347			8.46426
CON_06f_m67_001		32			0.755337			11.6873
CON_06f_m67_001		20			0.447702			10.871
CON_06f_m67_001		16			0.35004			16.1134
CON_06f_m67_001		56			0.823494			20.6956
CON_06f_m67_001		100			1.06142			18.9813
CON_06f_m67_001		212			1.55973			22.2724
CON_06f_m67_001		44			0.981427			18.8165
CON_06f_m67_001		44			1.05549			24.4611
CON_06f_m67_001		24			0.583837			10.1763
CON_06f_m67_001		16			0.590212			10.7688
CON_06f_m67_002		72			0.778598			21.2757
CON_06f_m67_002		48			0.884029			12.5443
CON_06f_m67_002		16			0.440037			9.17922
CON_06f_m67_002		20			0.326911			10.9404
CON_06f_m67_002		128			0.904046			15.1548
CON_06f_m67_002		40			0.572248			10.854
CON_06f_m67_002		52			0.876868			16.166
CON_06f_m67_002		32			0.622382			12.5095
CON_06f_m67_002		48			1.16404			13.1078
CON_06f_m67_002		20			0.686343			11.8844
CON_06f_m67_002		76			1.12741			14.6249
CON_06f_m67_002		40			0.671572			16.0413
CON_06f_m67_002		16			0.470952			12.8881
CON_06f_m67_002		72			1.02847			16.162
CON_06f_m67_002		104			1.36061			16.85
CON_06f_m67_002		64			1.12772			18.3556
CON_06f_m67_002		24			0.222493			10.0925
CON_06f_m67_002		84			1.46547			18.6701
CON_06f_m67_002		16			0.341			11.5577
CON_06f_m67_002		16			0.351025			12.6552
CON_06f_m67_002		24			0.464333			14.7265
CON_06f_m67_002		24			0.709839			11.6294
CON_06f_m67_002		24			0.603455			15.5116
CON_06f_m67_002		68			0.773934			13.8952
CON_06f_m67_002		104			1.136			28.1416
CON_06f_m67_002		40			0.911424			11.4311
CON_06f_m67_002		16			0.330662			21.181
CON_06f_m67_002		32			0.741463			15.2958
CON_06f_m67_002		20			0.44619			15.6084
CON_06f_m67_002		16			0.447255			14.0807
CON_06f_m67_002		52			1.12814			14.1172
CON_06f_m67_002		16			0.447559			11.0386
CON_06f_m67_002		48			1.02873			15.6947
CON_06f_m67_002		60			0.723234			17.025
CON_06f_m67_002		16			0.475183			14.7252
CON_06f_m67_002		24			0.518445			14.8898
CON_06f_m67_002		24			0.556446			13.2091
CON_06f_m67_002		56			1.08555			16.5533
CON_06f_m67_002		28			0.467659			26.927
CON_06f_m67_002		36			0.460016			16.61
CON_06f_m67_002		76			0.998653			22.0478
CON_06f_m67_002		24			0.566362			13.092
CON_06f_m67_002		44			0.850917			24.9838
CON_06f_m67_002		28			0.690949			24.1191
CON_06f_m67_002		24			0.711193			17.5154
CON_06f_m67_002		36			0.66819			15.4828
CON_06f_m67_002		68			0.836978			18.6635
CON_06f_m67_002		60			1.0642			14.7654
GMA-01f_m67_002		24			0.281289			21.921
GMA-01f_m67_002		44			0.555209			13.8353
GMA-01f_m67_002		44			0.607835			16.3359
GMA-01f_m67_002		60			1.05201			16.6645
GMA-01f_m67_002		24			0.536429			9.16974
GMA-01f_m67_002		32			0.563854			9.53555
GMA-01f_m67_002		32			1.00369			14.0124
GMA-01f_m67_002		28			0.386756			9.20877
GMA-01f_m67_002		36			0.76342			14.06
GMA-01f_m67_002		44			0.876143			10.2651
GMA-01f_m67_002		32			0.56284			13.276
GMA-01f_m67_002		124			1.12529			18.7358
GMA-01f_m67_002		208			1.37889			14.2715
GMA-01f_m67_002		16			0.298441			10.7383
GMA-01f_m67_002		104			0.848117			17.4181
GMA-01f_m67_002		108			1.30879			18.6298
GMA-01f_m67_002		108			1.17226			16.4338
GMA-01f_m67_002		32			0.346177			11.3448
GMA-01f_m67_002		52			0.685451			14.3169
GMA-01f_m67_002		136			1.1179			16.3503
GMA-01f_m67_002		68			1.04634			17.3435
GMA-01f_m67_002		48			0.582088			10.0076
GMA-01f_m67_002		60			1.1787			16.0016
GMA-01f_m67_002		24			0.81285			13.6288
GMA-01f_m67_002		80			0.887333			17.0718
GMA-01f_m67_002		52			0.857086			12.2574
GMA-01f_m67_002		20			0.360093			10.5689
GMA-01f_m67_002		16			0.462545			11.7478
GMA-01f_m67_002		16			0.159927			11.3924
GMA-01f_m67_002		32			0.696415			12.5196
GMA-01f_m67_002		28			0.408829			11.5023
GMA-01f_m67_002		16			0.392461			9.73377
GMA-01f_m67_002		104			1.15885			12.8065
GMA-01f_m67_002		16			0.342651			11.7836
GMA-01f_m67_002		16			0.0509863			11.4769
GMA-01f_m67_002		16			0.268212			9.83566
GMA-01f_m67_002		28			0.323486			14.3811
GMA-01f_m67_002		52			0.745301			13.5748
GMA-01f_m67_002		48			0.68297			16.0565
GMA-01f_m67_002		36			0.619992			18.1717
GMA-01f_m67_002		24			0.759156			16.6264
GMA-01f_m67_002		24			0.677392			13.2731
GMA-01f_m67_002		28			0.346629			11.9172
GMA-01f_m67_002		40			0.518559			12.8718
GMA-01f_m67_002		40			0.817567			17.2796
GMA-01f_m67_002		28			0.90527			15.2541
GMA-01f_m67_002		16			0.501703			15.7434
GMA-01f_m67_002		32			0.953769			18.075
GMA-01f_m67_002		160			1.62814			21.6229
GMA-01f_m67_002		16			0.364258			19.9307
GMA-01f_m67_002		24			0.801285			12.9994
GMA-01f_m67_003		52			0.899874			19.3921
GMA-01f_m67_003		20			0.762864			11.5079
GMA-01f_m67_003		20			0.28768			12.3065
GMA-01f_m67_003		52			0.84635			13.642
GMA-01f_m67_003		96			0.854656			22.6732
GMA-01f_m67_003		32			0.323283			11.6447
GMA-01f_m67_003		40			0.614396			14.6205
GMA-01f_m67_003		20			0.367619			14.4201
GMA-01f_m67_003		40			0.811788			15.2175
GMA-01f_m67_003		16			0.357863			12.7246
GMA-01f_m67_003		208			1.2245			21.8981
GMA-01f_m67_003		28			0.767752			16.096
GMA-01f_m67_003		72			0.756226			17.437
GMA-01f_m67_003		16			0.733044			13.3382
GMA-01f_m67_003		36			0.828673			16.9655
GMA-01f_m67_003		60			0.856648			18.0314
GMA-01f_m67_003		16			0.304026			9.74987
GMA-01f_m67_003		28			0.635822			15.8487
GMA-01f_m67_003		28			0.627719			14.459
GMA-01f_m67_003		20			0.549734			12.2894
GMA-01f_m67_003		20			0.923165			14.4705
GMA-01f_m67_003		24			0.729192			10.8232
GMA-01f_m67_003		28			0.650012			13.7806
GMA-01f_m67_003		28			0.814969			12.2975
GMA-01f_m67_003		20			0.286096			11.0996
GMA-01f_m67_003		36			0.559207			16.4012
GMA-01f_m67_003		28			0.547114			13.2778
GMA-01f_m67_003		20			0.613838			15.642
GMA-01f_m67_003		24			0.775192			13.8155
GMA-01f_m67_003		20			0.454465			12.3261
GMA-01f_m67_003		16			0.835602			15.8212
GMA-01f_m67_003		72			1.1843			12.8919
GMA-01f_m67_003		28			0.532032			10.9909
GMA-01f_m67_003		60			0.768916			12.1238
GMA-01f_m67_003		40			0.761155			13.7355
GMA-01f_m67_003		16			0.699283			10.2917
GMA-01f_m67_003		28			0.852414			11.0278
GMA-01f_m67_003		72			1.16903			12.8512
GMA-01f_m67_003		48			0.807776			11.0121
GMA-01f_m67_003		72			0.821648			14.1472
GMA-01f_m67_003		24			0.580288			10.4028
GMA-01f_m67_003		208			1.25905			22.6422
GMA-01f_m67_003		48			0.637541			14.8219
GMA-01f_m67_003		96			1.14201			14.3947
GMA-01f_m67_003		24			0.633846			14.3674
GMA-01f_m67_003		68			1.26921			19.7554
GMA-01f_m67_003		36			0.797134			11.6212
GMA-01f_m67_003		40			0.610941			10.8445
GMA-01f_m67_003		36			0.877446			19.1132
GMA-01f_m67_003		60			1.29948			14.7187
GMA-01f_m67_003		32			0.956201			14.8369
GMA-01f_m67_003		28			0.578313			11.1023
GMA-01f_m67_003		60			0.736953			13.6299
GMA-01f_m67_003		24			0.444269			11.3517
GMA-01f_m67_003		24			0.421925			9.69084
GMA-01f_m67_003		40			0.430588			12.4483
GMA-01f_m67_003		48			1.25836			18.9548
GMA-01f_m67_003		40			0.487357			11.7455
GMA-01f_m67_003		48			0.635617			13.615
GMA-01f_m67_003		20			0.403338			11.1491
GMA-01f_m67_003		52			0.701386			11.4172
GMA-01f_m67_003		48			0.708391			11.9173
GMA-01f_m67_003		28			0.517237			11.5536
GMA-01f_m67_003		16			0.358105			13.0811
GMA-01f_m67_003		32			1.36007			11.3594
GMA-01f_m67_003		76			1.10083			22.8491
GMA-01f_m67_003		16			0.187244			11.1299
GMA-01f_m67_003		48			0.956049			14.7753
GMA-01f_m67_003		28			0.356931			11.1419
GMA-01f_m67_003		24			0.376673			11.3595
GMA-01f_m67_003		16			0.461276			8.60131
GMA-01f_m67_003		28			0.740891			12.8795
GMA-01f_m67_003		20			0.479974			10.2029
GMA-01f_m67_003		16			0.147431			16.044
GMA-01f_m67_003		24			0.247567			10.5527
GMA-01f_m67_003		24			0.552283			11.3338
GMA-01f_m67_003		132			1.23069			22.7995
GMA-01f_m67_003		28			0.237175			13.2646
GMA-01f_m67_003		168			1.30845			20.6893
GMA-01f_m67_003		20			0.414004			12.0721
GMA-01f_m67_003		16			0.328993			10.4112
GMA-01f_m67_003		64			0.826754			15.0678
GMA-01f_m67_003		20			0.36217			8.86928
GMA-01f_m67_003		64			1.21619			21.7132
GMA-01f_m67_003		40			0.832662			14.5425
GMA-01f_m67_003		24			0.385451			12.5867
GMA-01f_m67_003		16			0.138432			10.9471
GMA-01f_m67_003		56			1.2273			15.8781
GMA-01f_m67_003		24			0.659044			11.6363
GMA-01f_m67_003		28			0.84571			10.684
GMA-01f_m67_003		72			1.09876			15.4771
GMA-01f_m67_003		56			0.514309			12.3712
GMA-01f_m67_003		28			1.55613			17.4837
GMA-01f_m67_003		40			1.29704			14.961
GMA-01f_m67_003		52			0.96929			13.2075
GMA-01f_m67_003		40			0.469374			11.7789
GMA-03f_m67_001		44			0.404691			10.9279
GMA-03f_m67_001		24			0.437078			9.44492
GMA-03f_m67_001		48			0.606854			14.7495
GMA-03f_m67_001		20			0.375118			10.3955
GMA-03f_m67_001		52			1.01533			10.3934
GMA-03f_m67_001		28			0.407684			9.74922
GMA-03f_m67_001		156			1.46099			19.8334
GMA-03f_m67_001		40			0.738093			10.484
GMA-03f_m67_001		120			1.2096			29.5006
GMA-03f_m67_001		20			0.570776			11.4487
GMA-03f_m67_001		16			0.556586			12.2905
GMA-03f_m67_001		28			0.795688			13.6205
GMA-03f_m67_001		16			0.756912			8.56
GMA-03f_m67_001		16			0.348402			9.29216
GMA-03f_m67_001		20			0.356032			9.31408
GMA-03f_m67_001		20			0.447213			10.1767
GMA-03f_m67_001		28			0.480672			12.3587
GMA-03f_m67_001		32			0.994087			13.4487
GMA-03f_m67_001		20			0.557302			9.05342
GMA-03f_m67_001		28			0.507378			11.1715
GMA-03f_m67_001		20			0.195854			10.458
GMA-03f_m67_001		16			0.103956			10.0503
GMA-03f_m67_001		16			0.309403			11.4565
GMA-03f_m67_001		20			0.266977			10.9259
GMA-03f_m67_001		24			0.248475			11.413
GMA-03f_m67_001		56			1.03668			19.1855
GMA-03f_m67_001		24			0.538124			20.5131
GMA-03f_m67_001		24			0.465794			9.61683
GMA-03f_m67_001		20			0.304013			9.62357
GMA-03f_m67_001		44			0.523514			13.0542
GMA-03f_m67_001		28			0.62602			12.6746
GMA-03f_m67_001		44			0.700797			12.7245
GMA-03f_m67_001		24			0.592984			13.0694
GMA-03f_m67_001		16			0.415444			12.7893
GMA-03f_m67_001		20			0.403152			10.031
GMA-03f_m67_001		20			0.211465			9.79407
GMA-03f_m67_001		136			1.07914			17.529
GMA-03f_m67_001		20			0.666129			10.2569
GMA-03f_m67_002		84			1.26093			20.4244
GMA-03f_m67_002		64			0.9983			14.0747
GMA-03f_m67_002		24			0.750881			18.0988
GMA-03f_m67_002		40			0.480854			15.633
GMA-03f_m67_002		36			0.393356			9.70671
GMA-03f_m67_002		36			0.473503			11.3323
GMA-03f_m67_002		32			0.420966			8.46751
GMA-03f_m67_002		28			0.378264			9.00147
GMA-03f_m67_002		64			0.672773			14.9137
GMA-03f_m67_002		104			1.10783			16.2171
GMA-03f_m67_002		20			0.166498			8.38804
GMA-03f_m67_002		28			0.362694			9.12208
GMA-03f_m67_002		40			0.628115			15.5353
GMA-03f_m67_002		36			0.444006			8.57609
GMA-03f_m67_002		20			0.293589			9.96949
GMA-03f_m67_002		40			0.789331			11.0059
GMA-03f_m67_002		36			0.560824			11.5374
GMA-03f_m67_002		16			0.480388			10.1338
GMA-03f_m67_002		24			0.332292			11.1273
GMA-03f_m67_002		24			0.372828			11.1572
GMA-03f_m67_002		36			0.370835			9.47632
GMA-03f_m67_002		40			0.504299			12.7975
GMA-03f_m67_002		64			1.13163			20.7342
GMA-03f_m67_002		52			1.65516			17.4719
GMA-03f_m67_002		28			0.666402			14.7734
GMA-03f_m67_002		32			0.370092			10.7839
GMA-03f_m67_002		16			0.297265			10.2016
GMA-03f_m67_002		24			0.449649			11.8253
GMA-03f_m67_002		96			1.14392			25.8304
GMA-03f_m67_002		16			0.532364			9.39722
GMA-03f_m67_002		36			0.607812			10.0541
GMA-03f_m67_002		32			0.287288			16.7457
GMA-03f_m67_002		24			0.580322			9.30728
GMA-03f_m67_002		80			0.792849			13.0722
GMA-03f_m67_002		72			0.858305			11.2384
GMA-03f_m67_002		204			0.867847			16.2389
GMA-03f_m67_002		112			1.14832			18.5227
GMA-03f_m67_002		16			1.27548			16.219
GMA-03f_m67_002		40			0.592677			16.4122
GMA-03f_m67_002		40			0.60084			11.1354
GMA-03f_m67_002		64			1.1534			14.9239
GMA-03f_m67_002		20			0.437644			9.08361
GMA-03f_m67_002		20			0.493217			13.3956
GMA-03f_m67_002		24			0.127444			10.7032
GMA-03f_m67_002		16			0.248715			10.936
GMA-03f_m67_002		20			1.29686			12.8485
GMA-03f_m67_002		52			0.967258			16.6212
GMA-03f_m67_002		56			0.449256			12.8805
GMA-03f_m67_002		24			0.333387			11.0136
GMA-03f_m67_002		92			0.986774			15.5575
GMA-03f_m67_002		36			0.490785			10.6346
GMA-03f_m67_002		96			1.22605			26.9423
GMA-03f_m67_002		140			1.04044			15.1164
GMA-03f_m67_002		196			1.18478			38.7669
GMA-03f_m67_002		32			0.506901			12.3028
GMA-03f_m67_002		16			0.341616			10.0287
GMA-03f_m67_002		44			0.412991			11.2122
GMA-03f_m67_002		60			0.892974			17.6562
GMA-03f_m67_002		32			0.513175			11.6211
GMA-03f_m67_002		44			0.917551			12.079
GMA-03f_m67_002		64			0.513782			14.9366
GMA-03f_m67_002		72			0.754287			16.8652
GMA-03f_m67_002		156			1.14778			23.1287
GMA-03f_m67_002		160			1.43134			18.3224
GMA-03f_m67_002		24			0.409257			12.8886
GMA-03f_m67_002		40			1.1939			17.7504
GMA-03f_m67_002		16			0.228093			10.2626
GMA-03f_m67_002		16			0.548846			12.4522
GMA-03f_m67_002		76			0.839527			15.4728
GMA-03f_m67_002		32			0.494888			13.5082
GMA-03f_m67_002		16			0.204244			12.0049
GMA-03f_m67_002		24			0.392141			10.8025
GMA-03f_m67_002		104			1.0615			24.5683
GMA-03f_m67_002		16			0.369507			10.0058
GMA-03f_m67_002		128			0.707182			39.1773
GMA-03f_m67_002		56			0.971779			17.2974
GMA-03f_m67_002		60			0.659548			15.381
GMA-03f_m67_002		76			0.95444			28.2699
GMA-03f_m67_002		16			0.337452			9.96021
GMA-03f_m67_002		36			0.37817			12.7059
GMA-03f_m67_002		16			0.424326			11.9371
GMA-03f_m67_002		76			1.13548			25.5936
GMA-03f_m67_002		36			0.466758			14.9869
GMA-03f_m67_002		16			0.130307			11.5221
GMA-03f_m67_002		68			0.558555			13.001
GMA-03f_m67_002		280			1.76279			31.8522
GMA-03f_m67_002		56			0.568516			15.2795
GMA-03f_m67_002		20			0.113375			10.4692
GMA-03f_m67_002		24			0.456935			10.7069
GMA-03f_m67_002		36			0.560163			19.8695
GMA-03f_m67_002		16			0.518059			11.4556
GMA-03f_m67_002		16			0.688935			15.6352
GMA-03f_m67_002		16			0.269048			13.6523
GMA-03f_m67_002		20			0.63241			15.7509
GMA-03f_m67_002		16			0.391853			11.8965
GMA-03f_m67_003		184			1.5341			27.4094
GMA-03f_m67_003		52			0.667331			13.0277
GMA-03f_m67_003		20			0.475941			11.8665
GMA-03f_m67_003		60			1.23677			16.297
GMA-03f_m67_003		84			1.19897			16.8918
GMA-03f_m67_003		60			1.12202			13.7136
GMA-03f_m67_003		52			0.950184			16.5195
GMA-03f_m67_003		196			1.34001			20.4732
GMA-03f_m67_003		24			0.463377			8.91225
GMA-03f_m67_003		44			0.481654			12.8698
GMA-03f_m67_003		16			0.388436			9.35125
GMA-03f_m67_003		144			1.35154			21.7087
GMA-03f_m67_003		20			0.330367			10.1829
GMA-03f_m67_003		20			0.726127			12.5767
GMA-03f_m67_003		20			0.405076			9.63131
GMA-03f_m67_003		76			0.791742			15.5767
GMA-03f_m67_003		40			0.427958			11.6645
GMA-03f_m67_003		20			0.14965			11.296
GMA-03f_m67_003		148			1.38486			15.8495
GMA-03f_m67_003		40			1.15804			20.4151
GMA-03f_m67_003		48			1.50252			13.2929
GMA-03f_m67_003		16			0.339121			13.624
GMA-03f_m67_003		32			0.673347			15.4846
GMA-03f_m67_003		48			1.02821			16.7054
GMA-03f_m67_003		28			0.42237			11.8966
GMA-03f_m67_003		28			0.481604			12.8209
GMA-03f_m67_003		16			0.676827			12.4298
GMA-03f_m67_003		52			0.946166			14.8754
GMA-03f_m67_003		16			0.185696			11.7655
GMA-03f_m67_003		16			0.820205			9.43527
GMA-03f_m67_003		48			0.789125			15.7546
GMA-03f_m67_003		76			0.997796			13.7355
GMA-03f_m67_003		32			0.650765			16.054
GMA-03f_m67_003		44			0.614403			14.6296
GMA-03f_m67_003		80			0.848132			24.4699
GMA-03f_m67_003		80			0.762883			18.4143
GMA-03f_m67_003		44			1.16111			20.6367
GMA-03f_m67_003		28			0.434594			20.3718
GMA-03f_m67_003		20			0.447463			10.2213
GMA-03f_m67_003		44			0.82593			16.8735
GMA-03f_m67_003		16			0.479498			11.8539
GMA-03f_m67_003		52			0.954716			19.1712
GMA-03f_m67_003		32			0.498936			21.7883
GMA-03f_m67_003		20			0.318787			12.8543
GMA-03f_m67_003		16			0.421066			13.4551
GMA-03f_m67_003		24			0.39278			15.1671
GMA-03f_m67_003		24			0.473613			15.5781
GMA-03f_m67_003		48			1.46729			11.0489
GMA-03f_m67_003		20			0.531118			10.9779
GMA-03f_m67_003		40			0.839752			19.2347
GMA-03f_m67_003		108			1.35062			12.3878
GMA-04f_m67_001		128			1.12902			17.7967
GMA-04f_m67_001		24			0.442457			10.9672
GMA-04f_m67_001		108			0.940253			11.5023
GMA-04f_m67_001		56			0.319791			9.71568
GMA-04f_m67_001		20			0.138906			12.219
GMA-04f_m67_001		24			0.326204			8.77768
GMA-04f_m67_001		24			0.21495			10.2513
GMA-04f_m67_001		36			0.592903			14.1509
GMA-04f_m67_001		16			0.401508			9.4873
GMA-04f_m67_001		60			0.562492			11.6519
GMA-04f_m67_001		16			0.280399			7.83231
GMA-04f_m67_001		52			0.914103			17.8202
GMA-04f_m67_001		28			0.330601			8.90554
GMA-04f_m67_001		28			0.391358			10.2804
GMA-04f_m67_001		36			0.611373			13.095
GMA-04f_m67_001		120			0.738084			12.6382
GMA-04f_m67_001		16			0.177129			8.85769
GMA-04f_m67_001		20			0.163887			9.54268
GMA-04f_m67_001		20			0.235276			8.9522
GMA-04f_m67_001		104			0.739253			11.8532
GMA-04f_m67_001		32			0.343485			10.0943
GMA-04f_m67_001		32			0.500134			9.99229
GMA-04f_m67_001		288			0.951811			20.4534
GMA-04f_m67_001		92			1.1609			15.8057
GMA-04f_m67_001		16			0.31008			8.62599
GMA-04f_m67_001		20			0.388485			9.32052
GMA-04f_m67_001		52			0.671406			14.2212
GMA-04f_m67_001		16			0.610196			9.61167
GMA-04f_m67_001		84			0.824565			13.5864
GMA-04f_m67_001		24			0.367407			10.8962
GMA-04f_m67_001		76			1.11205			15.8726
GMA-04f_m67_001		16			0.228187			8.19142
GMA-04f_m67_001		40			0.478429			11.1003
GMA-04f_m67_001		104			0.809852			11.7641
GMA-04f_m67_001		32			0.619559			11.5721
GMA-04f_m67_001		28			0.682676			12.1213
GMA-04f_m67_001		48			0.407092			11.6281
GMA-04f_m67_001		16			0.376075			8.88399
GMA-04f_m67_001		20			0.201172			9.97723
GMA-04f_m67_001		28			0.491245			13.3142
GMA-04f_m67_001		24			0.61896			12.153
GMA-04f_m67_001		24			0.451952			11.4132
GMA-04f_m67_001		24			0.427885			11.1025
GMA-04f_m67_001		24			0.524271			12.4801
GMA-04f_m67_001		148			0.73375			11.8142
GMA-04f_m67_001		172			0.798146			11.924
GMA-04f_m67_001		164			0.980139			12.8879
GMA-04f_m67_001		36			0.598709			10.0459
GMA-04f_m67_001		116			1.38632			24.8673
GMA-04f_m67_002		28			0.340946			9.31996
GMA-04f_m67_002		80			1.41405			15.6137
GMA-04f_m67_002		36			0.924394			15.0986
GMA-04f_m67_002		24			0.517183			9.65784
GMA-04f_m67_002		16			0.456349			9.32468
GMA-04f_m67_002		60			0.670917			10.2761
GMA-04f_m67_002		56			0.746087			12.1547
GMA-04f_m67_002		36			0.367003			12.881
GMA-04f_m67_002		80			0.689925			11.7713
GMA-04f_m67_002		40			0.834074			14.99
GMA-04f_m67_002		88			0.782972			16.2576
GMA-04f_m67_002		16			0.36256			10.1826
GMA-04f_m67_002		48			0.62121			9.81161
GMA-04f_m67_002		44			0.516533			8.89079
GMA-04f_m67_002		16			0.345052			9.48198
GMA-04f_m67_002		48			0.578346			11.022
GMA-04f_m67_002		32			1.04025			15.5175
GMA-04f_m67_002		24			0.648245			11.6768
GMA-04f_m67_002		16			0.603764			8.43267
GMA-04f_m67_002		44			0.555056			11.4069
GMA-04f_m67_002		52			1.35214			20.7233
GMA-04f_m67_002		36			0.951792			15.1865
GMA-04f_m67_002		124			0.65431			17.41
GMA-04f_m67_002		16			0.932812			8.47428
GMA-04f_m67_002		16			0.354257			8.65855
GMA-04f_m67_002		20			0.416215			10.248
GMA-04f_m67_002		16			0.497334			11.009
GMA-04f_m67_002		20			0.643138			12.0596
GMA-04f_m67_002		28			0.425508			9.98918
GMA-04f_m67_002		36			1.03113			13.3762
GMA-04f_m67_002		76			0.734596			16.2272
