# Supplementary material for: An autoinhibitory clamp of actin assembly constrains and directs synaptic endocytosis
Source: eLife journal article supplement (doi:10.7554/elife.69597), 2021-07-29
Supplement: fig1-data1 [file Figure 1S1C-E_WspRNAi Dynamics.xlsx]

## Sheet: OrganizedNMJ-Int_CoV
			63.7985	33.5302		523.166	947.514		0.598811	0.339819
File	File		CellArea	CellArea		GMAMean	GMAMean		GMACoV	GMACoV
Cont	WspRNAi		Cont	WspRNAi		Cont	WspRNAi		Cont	WspRNAi
CONT-01m_m67_001_Reg.tif	WASp-01m_m67_001_Reg.tif		114.116	8.21333		266.311	825.768		0.61829	0.55762
CONT-01m_m67_002_Reg.tif	WASp-01m_m67_002_Reg.tif		22.2756	13.8667		433.7	757.928		0.47196	0.54171
CONT-01m_m67_003_Reg.tif	WASp-01m_m67_003_Reg.tif		81.4044	20.64		514.101	768.583		0.81535	0.49209
CONT-02m_m67_001_Reg.tif	WASp-02m_m67_001_Reg.tif		112.196	57.0844		752.958	878.765		0.6534	0.5909
CONT-02m_m67_002_Reg.tif	WASp-02m_m67_002_Reg.tif		24.1244	22.7733		387.294	1054.14		0.61728	0.02476
CONT-02m_m67_003_Reg.tif	WASp-02m_m67_003_Reg-2.tif		74.7733	26.4533		972.67	1511.97		0.67539	0.42418
CONT-03m_m67_001_Reg.tif	WASP-03f_m67_001_Reg.tif		117.013	43.7867		483.304	1140.29		0.61637	0.01666
CONT-03m_m67_002_Reg.tif	WASP-03f_m67_002_Reg.tif		42.7556	56.5689		130.311	1251.04		0.65181	0.51911
CONT-03m_m67_003_Reg.tif	WASP-04m_m67_001_Reg.tif		104.107	46.0267		352.49	952.448		0.6821	0.01226
CONT-04m_m67_001_Reg.tif	WASP-04m_m67_002_Reg.tif		24.5867	47.9111		426.806	1350.9		0.68233	0.0105
CONT-04m_m67_002_Reg.tif	WASP-04m_m67_003_Reg.tif		63.9822	33.0667		705.829	1454.44		0.62231	0.01439
CONT-05m_m67_001_Reg.tif	WASP-05m_m67_001_Reg.tif		97.6533	34.2578		616.821	485.635		0.67082	0.62859
CONT-05m_m67_002_Reg.tif	WASP-05m_m67_002_Reg.tif		33.4044	18.6489		499.084	449.983		0.53453	0.44608
CONT-06m_m67_002_Reg-2.tif	WASP-05m_m67_003_Reg.tif		25.2978	40.1244		645.282	383.308		0.02299	0.47862
CONT-06m_m67_003_Reg.tif			19.2889			660.533			0.64723

## Sheet: NMJ_Int-CoVFixed
File	File		CellArea	CellArea		Ch1Mean	Ch1Mean		Ch1CoV	Ch1CoV
Cont	WASp		Cont	WASp		Cont	WASp		Cont	WASp
CONT-01m_m67_001_Reg.tif	WASp-01_m67_001_Reg.tif		114.773	17.298		266.371	669.547		0.625	0.602
CONT-01m_m67_002_Reg.tif	WASp-01_m67_002_Reg.tif		93.298	16.551		544.158	700.881		0.612	0.606
CONT-01m_m67_003_Reg.tif	WASp-01_m67_003_Reg.tif		82.436	20.782		512.031	766.189		0.83	0.571
CONT-02m_m67_001_Reg.tif	WASp-02_m67_001_Reg.tif		113.973	58.044		746.346	874.65		0.659	0.618
CONT-02m_m67_002_Reg.tif	WASp-02_m67_002_Reg.tif		25.244	22.773		379.902	1054.14		0.624	0.564
CONT-02m_m67_003_Reg.tif	WASp-02_m67_003_Reg-2.tif		82.436	26.489		981.915	1510.89		0.729	0.451
CONT-03m_m67_001_Reg.tif	WASP-03f_m67_001_Reg.tif		117.049	43.787		483.201	1140.29		0.622	0.729
CONT-03m_m67_002_Reg.tif	WASP-03f_m67_002_Reg.tif		43.271	56.693		130.655	1249.3		0.692	0.52
CONT-03m_m67_003_Reg.tif	WASP-04m_m67_001_Reg.tif		105.902	46.027		352.207	952.448		0.695	0.564
CONT-04m_m67_001_Reg.tif	WASP-04m_m67_002_Reg.tif		40.462	47.911		413.078	1350.9		0.658	0.503
CONT-04m_m67_002_Reg.tif	WASP-04m_m67_003_Reg.tif		64.196	33.067		704.578	1454.44		0.64	0.476
CONT-05m_m67_001_Reg.tif	WASP-05m_m67_001_Reg.tif		104.889	34.756		597.205	483.609		0.687	0.629
CONT-05m_m67_002_Reg.tif	WASP-05m_m67_002_Reg.tif		46.347	46.098		563.308	419.925		0.577	0.486
CONT-06m_m67_002_Reg-1.tif	WASP-05m_m67_003_Reg.tif		27.431	44.622		638.715	385.663		0.477	0.488
CONT-06m_m67_002_Reg-2.tif			25.298			645.282			0.582
CONT-06m_m67_003_Reg.tif			19.52			656.566			0.654

## Sheet: RawPTData
NMJ-ROI	NMJ	Geno	Duration	MeanIntensity	NormIntensityRange
CONT-01m_m67_001.xlsx_RoiSetAuto-10.zip Distance px	CONT-01m_m67_001	CONT	16	3905.65	0.766228			Cont	WASpRNAi
CONT-01m_m67_001.xlsx_RoiSetAuto-11.zip Distance px	CONT-01m_m67_001	CONT	32	2492.2	0.853161		16-28	48.378	49.3007
CONT-01m_m67_001.xlsx_RoiSetAuto-12.zip Distance px	CONT-01m_m67_001	CONT	84	3775.37	1.59288		32-100	45.134	38.8112
CONT-01m_m67_001.xlsx_RoiSetAuto-13.zip Distance px	CONT-01m_m67_001	CONT	92	4143.48	0.792231		>100	6.48801	11.8881
CONT-01m_m67_001.xlsx_RoiSetAuto-14.zip Distance px	CONT-01m_m67_001	CONT	20	2988.08	0.694621
CONT-01m_m67_001.xlsx_RoiSetAuto-15.zip Distance px	CONT-01m_m67_001	CONT	16	2431.92	0.265422
CONT-01m_m67_001.xlsx_RoiSetAuto-16.zip Distance px	CONT-01m_m67_001	CONT	28	3456.56	0.9836
CONT-01m_m67_001.xlsx_RoiSetAuto-17.zip Distance px	CONT-01m_m67_001	CONT	60	3372.52	0.637985
CONT-01m_m67_001.xlsx_RoiSetAuto-18.zip Distance px	CONT-01m_m67_001	CONT	48	2941.54	1.18416
CONT-01m_m67_001.xlsx_RoiSetAuto-19.zip Distance px	CONT-01m_m67_001	CONT	16	2893.86	0.608972
CONT-01m_m67_001.xlsx_RoiSetAuto-20.zip Distance px	CONT-01m_m67_001	CONT	148	4127.62	1.25597
CONT-01m_m67_001.xlsx_RoiSetAuto-23.zip Distance px	CONT-01m_m67_001	CONT	52	3294.2	0.884196
CONT-01m_m67_001.xlsx_RoiSetAuto-24.zip Distance px	CONT-01m_m67_001	CONT	16	3000.53	0.256592
CONT-01m_m67_001.xlsx_RoiSetAuto-26.zip Distance px	CONT-01m_m67_001	CONT	16	4016.26	0.553481
CONT-01m_m67_001.xlsx_RoiSetAuto-28.zip Distance px	CONT-01m_m67_001	CONT	32	2706.02	0.809772
CONT-01m_m67_001.xlsx_RoiSetAuto-29.zip Distance px	CONT-01m_m67_001	CONT	56	4213.08	1.48957
CONT-01m_m67_001.xlsx_RoiSetAuto-3.zip Distance px	CONT-01m_m67_001	CONT	16	3344.91	0.402055
CONT-01m_m67_001.xlsx_RoiSetAuto-30.zip Distance px	CONT-01m_m67_001	CONT	16	3048.97	0.159436
CONT-01m_m67_001.xlsx_RoiSetAuto-31.zip Distance px	CONT-01m_m67_001	CONT	40	3053.51	0.779002
CONT-01m_m67_001.xlsx_RoiSetAuto-32.zip Distance px	CONT-01m_m67_001	CONT	88	3138.15	1.06305
CONT-01m_m67_001.xlsx_RoiSetAuto-33.zip Distance px	CONT-01m_m67_001	CONT	24	2363.31	0.33869
CONT-01m_m67_001.xlsx_RoiSetAuto-34.zip Distance px	CONT-01m_m67_001	CONT	28	2754.81	0.520973
CONT-01m_m67_001.xlsx_RoiSetAuto-35.zip Distance px	CONT-01m_m67_001	CONT	20	3749.24	0.511695
CONT-01m_m67_001.xlsx_RoiSetAuto-36.zip Distance px	CONT-01m_m67_001	CONT	16	2547.49	0.933358
CONT-01m_m67_001.xlsx_RoiSetAuto-37.zip Distance px	CONT-01m_m67_001	CONT	24	2461.82	0.385377
CONT-01m_m67_001.xlsx_RoiSetAuto-38.zip Distance px	CONT-01m_m67_001	CONT	16	2816.1	0.306011
CONT-01m_m67_001.xlsx_RoiSetAuto-39.zip Distance px	CONT-01m_m67_001	CONT	28	2658.49	0.731815
CONT-01m_m67_001.xlsx_RoiSetAuto-4.zip Distance px	CONT-01m_m67_001	CONT	40	3249.86	0.821756
CONT-01m_m67_001.xlsx_RoiSetAuto-40.zip Distance px	CONT-01m_m67_001	CONT	36	3075.62	0.447613
CONT-01m_m67_001.xlsx_RoiSetAuto-41.zip Distance px	CONT-01m_m67_001	CONT	156	5583.44	1.40753
CONT-01m_m67_001.xlsx_RoiSetAuto-42.zip Distance px	CONT-01m_m67_001	CONT	24	3252.39	0.946496
CONT-01m_m67_001.xlsx_RoiSetAuto-43.zip Distance px	CONT-01m_m67_001	CONT	144	3103.86	1.03346
CONT-01m_m67_001.xlsx_RoiSetAuto-44.zip Distance px	CONT-01m_m67_001	CONT	44	3461.11	0.604261
CONT-01m_m67_001.xlsx_RoiSetAuto-46.zip Distance px	CONT-01m_m67_001	CONT	28	3207.36	0.864357
CONT-01m_m67_001.xlsx_RoiSetAuto-47.zip Distance px	CONT-01m_m67_001	CONT	56	3639.58	0.92669
CONT-01m_m67_001.xlsx_RoiSetAuto-48.zip Distance px	CONT-01m_m67_001	CONT	96	4131.61	0.979854
CONT-01m_m67_001.xlsx_RoiSetAuto-49.zip Distance px	CONT-01m_m67_001	CONT	16	2780.13	0.829659
CONT-01m_m67_001.xlsx_RoiSetAuto-50.zip Distance px	CONT-01m_m67_001	CONT	20	3638.49	0.805627
CONT-01m_m67_001.xlsx_RoiSetAuto-51.zip Distance px	CONT-01m_m67_001	CONT	16	2479.35	0.504997
CONT-01m_m67_001.xlsx_RoiSetAuto-52.zip Distance px	CONT-01m_m67_001	CONT	76	3625.78	0.752609
CONT-01m_m67_001.xlsx_RoiSetAuto-53.zip Distance px	CONT-01m_m67_001	CONT	40	3491.56	0.911841
CONT-01m_m67_001.xlsx_RoiSetAuto-54.zip Distance px	CONT-01m_m67_001	CONT	16	3176.82	0.578825
CONT-01m_m67_001.xlsx_RoiSetAuto-55.zip Distance px	CONT-01m_m67_001	CONT	112	3847.78	1.18987
CONT-01m_m67_001.xlsx_RoiSetAuto-56.zip Distance px	CONT-01m_m67_001	CONT	16	1829.43	0.560963
CONT-01m_m67_001.xlsx_RoiSetAuto-57.zip Distance px	CONT-01m_m67_001	CONT	64	3726.64	1.01259
CONT-01m_m67_001.xlsx_RoiSetAuto-58.zip Distance px	CONT-01m_m67_001	CONT	36	3826.92	0.571029
CONT-01m_m67_001.xlsx_RoiSetAuto-59.zip Distance px	CONT-01m_m67_001	CONT	28	2031.57	0.945463
CONT-01m_m67_001.xlsx_RoiSetAuto-6.zip Distance px	CONT-01m_m67_001	CONT	148	7278.22	0.891211
CONT-01m_m67_001.xlsx_RoiSetAuto-60.zip Distance px	CONT-01m_m67_001	CONT	68	5260.93	1.84603
CONT-01m_m67_001.xlsx_RoiSetAuto-61.zip Distance px	CONT-01m_m67_001	CONT	28	3057.58	0.202103
CONT-01m_m67_001.xlsx_RoiSetAuto-62.zip Distance px	CONT-01m_m67_001	CONT	40	3535.52	0.999944
CONT-01m_m67_001.xlsx_RoiSetAuto-63.zip Distance px	CONT-01m_m67_001	CONT	24	2203.25	0.315074
CONT-01m_m67_001.xlsx_RoiSetAuto-64.zip Distance px	CONT-01m_m67_001	CONT	36	5159.93	0.869855
CONT-01m_m67_001.xlsx_RoiSetAuto-65.zip Distance px	CONT-01m_m67_001	CONT	28	3198.98	0.798746
CONT-01m_m67_001.xlsx_RoiSetAuto-66.zip Distance px	CONT-01m_m67_001	CONT	68	3665.45	1.03868
CONT-01m_m67_001.xlsx_RoiSetAuto-67.zip Distance px	CONT-01m_m67_001	CONT	48	3074.64	0.726625
CONT-01m_m67_001.xlsx_RoiSetAuto-68.zip Distance px	CONT-01m_m67_001	CONT	28	3060.22	0.554092
CONT-01m_m67_001.xlsx_RoiSetAuto-69.zip Distance px	CONT-01m_m67_001	CONT	60	4401.17	0.822345
CONT-01m_m67_001.xlsx_RoiSetAuto-70.zip Distance px	CONT-01m_m67_001	CONT	20	2436.25	0.630933
CONT-01m_m67_001.xlsx_RoiSetAuto-71.zip Distance px	CONT-01m_m67_001	CONT	28	2711.03	1.16975
CONT-01m_m67_001.xlsx_RoiSetAuto-72.zip Distance px	CONT-01m_m67_001	CONT	16	2956.44	0.396167
CONT-01m_m67_001.xlsx_RoiSetAuto-73.zip Distance px	CONT-01m_m67_001	CONT	24	2472.19	0.679458
CONT-01m_m67_001.xlsx_RoiSetAuto-74.zip Distance px	CONT-01m_m67_001	CONT	16	3550.46	0.694332
CONT-01m_m67_001.xlsx_RoiSetAuto-75.zip Distance px	CONT-01m_m67_001	CONT	28	3385.48	1.01641
CONT-01m_m67_001.xlsx_RoiSetAuto-76.zip Distance px	CONT-01m_m67_001	CONT	24	5003.78	0.706762
CONT-01m_m67_001.xlsx_RoiSetAuto-77.zip Distance px	CONT-01m_m67_001	CONT	28	3292.15	0.63057
CONT-01m_m67_001.xlsx_RoiSetAuto-78.zip Distance px	CONT-01m_m67_001	CONT	16	2593.81	0.38517
CONT-01m_m67_001.xlsx_RoiSetAuto-79.zip Distance px	CONT-01m_m67_001	CONT	20	2613.74	0.321389
CONT-01m_m67_001.xlsx_RoiSetAuto-8.zip Distance px	CONT-01m_m67_001	CONT	92	6024.23	1.04565
CONT-01m_m67_001.xlsx_RoiSetAuto-80.zip Distance px	CONT-01m_m67_001	CONT	24	2984.76	0.873711
CONT-01m_m67_001.xlsx_RoiSetAuto-81.zip Distance px	CONT-01m_m67_001	CONT	16	2456.01	0.573407
CONT-01m_m67_001.xlsx_RoiSetAuto-83.zip Distance px	CONT-01m_m67_001	CONT	16	2926.09	0.778141
CONT-01m_m67_001.xlsx_RoiSetAuto-9.zip Distance px	CONT-01m_m67_001	CONT	36	4140.03	0.573672
CONT-01m_m67_002.xlsx_RoiSetAuto-1.zip Distance px	CONT-01m_m67_002	CONT	60	7337.3	0.989335
CONT-01m_m67_002.xlsx_RoiSetAuto-12.zip Distance px	CONT-01m_m67_002	CONT	24	6497.71	0.54937
CONT-01m_m67_002.xlsx_RoiSetAuto-15.zip Distance px	CONT-01m_m67_002	CONT	16	4061.79	0.182043
CONT-01m_m67_002.xlsx_RoiSetAuto-16.zip Distance px	CONT-01m_m67_002	CONT	16	3634.2	0.395602
CONT-01m_m67_002.xlsx_RoiSetAuto-17.zip Distance px	CONT-01m_m67_002	CONT	28	4311.5	1.03092
CONT-01m_m67_002.xlsx_RoiSetAuto-19.zip Distance px	CONT-01m_m67_002	CONT	84	7933.71	1.33123
CONT-01m_m67_002.xlsx_RoiSetAuto-2.zip Distance px	CONT-01m_m67_002	CONT	28	5030.1	0.583608
CONT-01m_m67_002.xlsx_RoiSetAuto-20.zip Distance px	CONT-01m_m67_002	CONT	28	3968.86	0.851955
CONT-01m_m67_002.xlsx_RoiSetAuto-21.zip Distance px	CONT-01m_m67_002	CONT	44	5040.82	0.776255
CONT-01m_m67_002.xlsx_RoiSetAuto-22.zip Distance px	CONT-01m_m67_002	CONT	20	4556.69	0.690302
CONT-01m_m67_002.xlsx_RoiSetAuto-23.zip Distance px	CONT-01m_m67_002	CONT	36	4909.96	0.898424
CONT-01m_m67_002.xlsx_RoiSetAuto-27.zip Distance px	CONT-01m_m67_002	CONT	16	5668.7	0.164375
CONT-01m_m67_002.xlsx_RoiSetAuto-28.zip Distance px	CONT-01m_m67_002	CONT	80	5454.31	1.05658
CONT-01m_m67_002.xlsx_RoiSetAuto-29.zip Distance px	CONT-01m_m67_002	CONT	28	4960.52	0.859422
CONT-01m_m67_002.xlsx_RoiSetAuto-3.zip Distance px	CONT-01m_m67_002	CONT	180	11233.6	1.50879
CONT-01m_m67_002.xlsx_RoiSetAuto-30.zip Distance px	CONT-01m_m67_002	CONT	40	7032.42	0.481288
CONT-01m_m67_002.xlsx_RoiSetAuto-33.zip Distance px	CONT-01m_m67_002	CONT	24	6639.91	0.897696
CONT-01m_m67_002.xlsx_RoiSetAuto-34.zip Distance px	CONT-01m_m67_002	CONT	32	4693.71	0.419126
CONT-01m_m67_002.xlsx_RoiSetAuto-35.zip Distance px	CONT-01m_m67_002	CONT	20	5003.07	0.396637
CONT-01m_m67_002.xlsx_RoiSetAuto-36.zip Distance px	CONT-01m_m67_002	CONT	16	3412.15	0.30039
CONT-01m_m67_002.xlsx_RoiSetAuto-37.zip Distance px	CONT-01m_m67_002	CONT	44	5980.15	0.664352
CONT-01m_m67_002.xlsx_RoiSetAuto-38.zip Distance px	CONT-01m_m67_002	CONT	180	8904.53	1.601
CONT-01m_m67_002.xlsx_RoiSetAuto-39.zip Distance px	CONT-01m_m67_002	CONT	28	3836.82	0.592548
CONT-01m_m67_002.xlsx_RoiSetAuto-4.zip Distance px	CONT-01m_m67_002	CONT	20	4406.74	0.451557
CONT-01m_m67_002.xlsx_RoiSetAuto-40.zip Distance px	CONT-01m_m67_002	CONT	16	5258.99	0.525358
CONT-01m_m67_002.xlsx_RoiSetAuto-41.zip Distance px	CONT-01m_m67_002	CONT	24	4760.79	0.664227
CONT-01m_m67_002.xlsx_RoiSetAuto-43.zip Distance px	CONT-01m_m67_002	CONT	36	5458.05	0.736713
CONT-01m_m67_002.xlsx_RoiSetAuto-44.zip Distance px	CONT-01m_m67_002	CONT	16	5749.58	0.75346
CONT-01m_m67_002.xlsx_RoiSetAuto-45.zip Distance px	CONT-01m_m67_002	CONT	20	6766.46	0.267975
CONT-01m_m67_002.xlsx_RoiSetAuto-46.zip Distance px	CONT-01m_m67_002	CONT	20	5637.83	0.42163
CONT-01m_m67_002.xlsx_RoiSetAuto-47.zip Distance px	CONT-01m_m67_002	CONT	16	4681.74	0.405984
CONT-01m_m67_002.xlsx_RoiSetAuto-49.zip Distance px	CONT-01m_m67_002	CONT	40	5121.63	0.628057
CONT-01m_m67_002.xlsx_RoiSetAuto-50.zip Distance px	CONT-01m_m67_002	CONT	28	4553.39	0.68206
CONT-01m_m67_002.xlsx_RoiSetAuto-51.zip Distance px	CONT-01m_m67_002	CONT	104	14420.3	1.00697
CONT-01m_m67_002.xlsx_RoiSetAuto-52.zip Distance px	CONT-01m_m67_002	CONT	24	5852.52	0.670077
CONT-01m_m67_002.xlsx_RoiSetAuto-55.zip Distance px	CONT-01m_m67_002	CONT	72	8607.09	1.37408
CONT-01m_m67_002.xlsx_RoiSetAuto-57.zip Distance px	CONT-01m_m67_002	CONT	16	4912.66	0.437748
CONT-01m_m67_002.xlsx_RoiSetAuto-58.zip Distance px	CONT-01m_m67_002	CONT	36	5996.8	0.709467
CONT-01m_m67_002.xlsx_RoiSetAuto-61.zip Distance px	CONT-01m_m67_002	CONT	16	4485.27	0.307479
CONT-01m_m67_002.xlsx_RoiSetAuto-63.zip Distance px	CONT-01m_m67_002	CONT	20	5311.48	0.717341
CONT-01m_m67_002.xlsx_RoiSetAuto-64.zip Distance px	CONT-01m_m67_002	CONT	80	11760.5	1.02015
CONT-01m_m67_002.xlsx_RoiSetAuto-66.zip Distance px	CONT-01m_m67_002	CONT	64	8796.32	0.746752
CONT-01m_m67_002.xlsx_RoiSetAuto-68.zip Distance px	CONT-01m_m67_002	CONT	36	9210.89	0.78958
CONT-01m_m67_002.xlsx_RoiSetAuto-7.zip Distance px	CONT-01m_m67_002	CONT	16	4120.02	0.301327
CONT-01m_m67_002.xlsx_RoiSetAuto-70.zip Distance px	CONT-01m_m67_002	CONT	88	7709.46	1.39038
CONT-01m_m67_002.xlsx_RoiSetAuto-72.zip Distance px	CONT-01m_m67_002	CONT	88	8347.93	1.92274
CONT-01m_m67_002.xlsx_RoiSetAuto-73.zip Distance px	CONT-01m_m67_002	CONT	76	8067.75	1.0284
CONT-01m_m67_002.xlsx_RoiSetAuto-75.zip Distance px	CONT-01m_m67_002	CONT	52	8386.29	1.26549
CONT-01m_m67_002.xlsx_RoiSetAuto-76.zip Distance px	CONT-01m_m67_002	CONT	80	7005.03	0.744453
CONT-01m_m67_002.xlsx_RoiSetAuto-77.zip Distance px	CONT-01m_m67_002	CONT	68	6880.51	0.691405
CONT-01m_m67_002.xlsx_RoiSetAuto-78.zip Distance px	CONT-01m_m67_002	CONT	16	4486.48	0.294333
CONT-01m_m67_002.xlsx_RoiSetAuto-79.zip Distance px	CONT-01m_m67_002	CONT	16	5150.14	0.761527
CONT-01m_m67_002.xlsx_RoiSetAuto-8.zip Distance px	CONT-01m_m67_002	CONT	16	5036.34	0.506484
CONT-01m_m67_002.xlsx_RoiSetAuto-81.zip Distance px	CONT-01m_m67_002	CONT	44	5858.24	0.683847
CONT-01m_m67_002.xlsx_RoiSetAuto-83.zip Distance px	CONT-01m_m67_002	CONT	52	5920.96	0.977334
CONT-01m_m67_002.xlsx_RoiSetAuto-84.zip Distance px	CONT-01m_m67_002	CONT	52	7045.49	0.627145
CONT-01m_m67_002.xlsx_RoiSetAuto-85.zip Distance px	CONT-01m_m67_002	CONT	28	5034.63	0.758962
CONT-01m_m67_002.xlsx_RoiSetAuto-86.zip Distance px	CONT-01m_m67_002	CONT	28	5384.52	0.643876
CONT-01m_m67_002.xlsx_RoiSetAuto-87.zip Distance px	CONT-01m_m67_002	CONT	36	5784.51	0.651808
CONT-01m_m67_002.xlsx_RoiSetAuto-88.zip Distance px	CONT-01m_m67_002	CONT	32	6220.41	0.704335
CONT-01m_m67_002.xlsx_RoiSetAuto-89.zip Distance px	CONT-01m_m67_002	CONT	36	5525.5	0.877673
CONT-01m_m67_002.xlsx_RoiSetAuto-9.zip Distance px	CONT-01m_m67_002	CONT	100	8797.33	1.02544
CONT-01m_m67_002.xlsx_RoiSetAuto-90.zip Distance px	CONT-01m_m67_002	CONT	20	5037.89	0.381313
CONT-01m_m67_003.xlsx_RoiSetAuto-1.zip Distance px	CONT-01m_m67_003	CONT	28	6875.2	0.641585
CONT-01m_m67_003.xlsx_RoiSetAuto-11.zip Distance px	CONT-01m_m67_003	CONT	52	8475.98	0.70496
CONT-01m_m67_003.xlsx_RoiSetAuto-12.zip Distance px	CONT-01m_m67_003	CONT	80	9456.74	1.08085
CONT-01m_m67_003.xlsx_RoiSetAuto-13.zip Distance px	CONT-01m_m67_003	CONT	48	5599.84	0.753888
CONT-01m_m67_003.xlsx_RoiSetAuto-15.zip Distance px	CONT-01m_m67_003	CONT	72	10808.6	1.38666
CONT-01m_m67_003.xlsx_RoiSetAuto-16.zip Distance px	CONT-01m_m67_003	CONT	16	5502.88	0.421196
CONT-01m_m67_003.xlsx_RoiSetAuto-19.zip Distance px	CONT-01m_m67_003	CONT	124	9734.49	1.37824
CONT-01m_m67_003.xlsx_RoiSetAuto-2.zip Distance px	CONT-01m_m67_003	CONT	24	6944.44	0.800426
CONT-01m_m67_003.xlsx_RoiSetAuto-20.zip Distance px	CONT-01m_m67_003	CONT	72	7332.27	0.769586
CONT-01m_m67_003.xlsx_RoiSetAuto-21.zip Distance px	CONT-01m_m67_003	CONT	28	5825.62	0.487423
CONT-01m_m67_003.xlsx_RoiSetAuto-22.zip Distance px	CONT-01m_m67_003	CONT	116	10964.9	1.1332
CONT-01m_m67_003.xlsx_RoiSetAuto-23.zip Distance px	CONT-01m_m67_003	CONT	24	5445.37	0.714967
CONT-01m_m67_003.xlsx_RoiSetAuto-24.zip Distance px	CONT-01m_m67_003	CONT	112	11545.4	1.14788
CONT-01m_m67_003.xlsx_RoiSetAuto-25.zip Distance px	CONT-01m_m67_003	CONT	108	9037.33	1.29585
CONT-01m_m67_003.xlsx_RoiSetAuto-26.zip Distance px	CONT-01m_m67_003	CONT	52	4867.02	0.498826
CONT-01m_m67_003.xlsx_RoiSetAuto-28.zip Distance px	CONT-01m_m67_003	CONT	60	7111.39	0.874307
CONT-01m_m67_003.xlsx_RoiSetAuto-29.zip Distance px	CONT-01m_m67_003	CONT	24	5477.78	0.413198
CONT-01m_m67_003.xlsx_RoiSetAuto-3.zip Distance px	CONT-01m_m67_003	CONT	52	5738.97	0.651524
CONT-01m_m67_003.xlsx_RoiSetAuto-30.zip Distance px	CONT-01m_m67_003	CONT	56	6489.22	0.816118
CONT-01m_m67_003.xlsx_RoiSetAuto-32.zip Distance px	CONT-01m_m67_003	CONT	40	5842.05	0.970394
CONT-01m_m67_003.xlsx_RoiSetAuto-33.zip Distance px	CONT-01m_m67_003	CONT	56	7577.41	0.632481
CONT-01m_m67_003.xlsx_RoiSetAuto-34.zip Distance px	CONT-01m_m67_003	CONT	72	7255.56	0.99146
CONT-01m_m67_003.xlsx_RoiSetAuto-36.zip Distance px	CONT-01m_m67_003	CONT	48	6062.68	1.08021
CONT-01m_m67_003.xlsx_RoiSetAuto-39.zip Distance px	CONT-01m_m67_003	CONT	16	4768.17	0.227868
CONT-01m_m67_003.xlsx_RoiSetAuto-4.zip Distance px	CONT-01m_m67_003	CONT	28	6883.77	0.542097
CONT-01m_m67_003.xlsx_RoiSetAuto-40.zip Distance px	CONT-01m_m67_003	CONT	16	5187.03	0.194553
CONT-01m_m67_003.xlsx_RoiSetAuto-41.zip Distance px	CONT-01m_m67_003	CONT	56	5475.72	0.794258
CONT-01m_m67_003.xlsx_RoiSetAuto-43.zip Distance px	CONT-01m_m67_003	CONT	20	7411.37	0.335834
CONT-01m_m67_003.xlsx_RoiSetAuto-44.zip Distance px	CONT-01m_m67_003	CONT	96	9170.4	0.924846
CONT-01m_m67_003.xlsx_RoiSetAuto-46.zip Distance px	CONT-01m_m67_003	CONT	84	8645.28	1.29956
CONT-01m_m67_003.xlsx_RoiSetAuto-47.zip Distance px	CONT-01m_m67_003	CONT	36	6291.45	0.928587
CONT-01m_m67_003.xlsx_RoiSetAuto-48.zip Distance px	CONT-01m_m67_003	CONT	56	6828.58	0.638115
CONT-01m_m67_003.xlsx_RoiSetAuto-49.zip Distance px	CONT-01m_m67_003	CONT	52	9210.08	1.81947
CONT-01m_m67_003.xlsx_RoiSetAuto-5.zip Distance px	CONT-01m_m67_003	CONT	84	6493.77	0.867634
CONT-01m_m67_003.xlsx_RoiSetAuto-50.zip Distance px	CONT-01m_m67_003	CONT	16	5362.13	0.17673
CONT-01m_m67_003.xlsx_RoiSetAuto-51.zip Distance px	CONT-01m_m67_003	CONT	48	9281.49	0.892207
CONT-01m_m67_003.xlsx_RoiSetAuto-52.zip Distance px	CONT-01m_m67_003	CONT	52	17134.2	1.11641
CONT-01m_m67_003.xlsx_RoiSetAuto-53.zip Distance px	CONT-01m_m67_003	CONT	16	6214.97	0.409048
CONT-01m_m67_003.xlsx_RoiSetAuto-55.zip Distance px	CONT-01m_m67_003	CONT	32	8834.26	1.00575
CONT-01m_m67_003.xlsx_RoiSetAuto-57.zip Distance px	CONT-01m_m67_003	CONT	28	6217.65	0.763278
CONT-01m_m67_003.xlsx_RoiSetAuto-58.zip Distance px	CONT-01m_m67_003	CONT	28	6007.75	0.497501
CONT-01m_m67_003.xlsx_RoiSetAuto-59.zip Distance px	CONT-01m_m67_003	CONT	24	5755.65	1.04615
CONT-01m_m67_003.xlsx_RoiSetAuto-6.zip Distance px	CONT-01m_m67_003	CONT	68	8578.87	0.991393
CONT-01m_m67_003.xlsx_RoiSetAuto-7.zip Distance px	CONT-01m_m67_003	CONT	204	13594	1.20984
CONT-01m_m67_003.xlsx_RoiSetAuto-8.zip Distance px	CONT-01m_m67_003	CONT	48	8837.22	0.975853
CONT-01m_m67_003.xlsx_RoiSetAuto-9.zip Distance px	CONT-01m_m67_003	CONT	56	5487.68	1.14877
CONT-02m_m67_001.xlsx_RoiSetAuto-1.zip Distance px	CONT-02m_m67_001	CONT	36	13508.9	0.700262
CONT-02m_m67_001.xlsx_RoiSetAuto-10.zip Distance px	CONT-02m_m67_001	CONT	20	8329.06	0.602355
CONT-02m_m67_001.xlsx_RoiSetAuto-11.zip Distance px	CONT-02m_m67_001	CONT	28	6896.12	0.419353
CONT-02m_m67_001.xlsx_RoiSetAuto-12.zip Distance px	CONT-02m_m67_001	CONT	16	7749.1	0.26244
CONT-02m_m67_001.xlsx_RoiSetAuto-13.zip Distance px	CONT-02m_m67_001	CONT	56	10505	0.899449
CONT-02m_m67_001.xlsx_RoiSetAuto-14.zip Distance px	CONT-02m_m67_001	CONT	28	7359.03	0.505461
CONT-02m_m67_001.xlsx_RoiSetAuto-15.zip Distance px	CONT-02m_m67_001	CONT	44	8600.94	0.591353
CONT-02m_m67_001.xlsx_RoiSetAuto-16.zip Distance px	CONT-02m_m67_001	CONT	16	7563.81	0.605887
CONT-02m_m67_001.xlsx_RoiSetAuto-17.zip Distance px	CONT-02m_m67_001	CONT	36	7904.02	0.474106
CONT-02m_m67_001.xlsx_RoiSetAuto-18.zip Distance px	CONT-02m_m67_001	CONT	24	7637.25	0.287487
CONT-02m_m67_001.xlsx_RoiSetAuto-19.zip Distance px	CONT-02m_m67_001	CONT	32	8528.41	0.746589
CONT-02m_m67_001.xlsx_RoiSetAuto-20.zip Distance px	CONT-02m_m67_001	CONT	20	7496.61	0.233948
CONT-02m_m67_001.xlsx_RoiSetAuto-21.zip Distance px	CONT-02m_m67_001	CONT	28	8110.54	0.364191
CONT-02m_m67_001.xlsx_RoiSetAuto-22.zip Distance px	CONT-02m_m67_001	CONT	172	14023.3	1.20626
CONT-02m_m67_001.xlsx_RoiSetAuto-23.zip Distance px	CONT-02m_m67_001	CONT	64	14959.3	0.623893
CONT-02m_m67_001.xlsx_RoiSetAuto-24.zip Distance px	CONT-02m_m67_001	CONT	40	8863.75	0.618812
CONT-02m_m67_001.xlsx_RoiSetAuto-26.zip Distance px	CONT-02m_m67_001	CONT	44	8068.04	0.515922
CONT-02m_m67_001.xlsx_RoiSetAuto-27.zip Distance px	CONT-02m_m67_001	CONT	16	6096.08	0.124193
CONT-02m_m67_001.xlsx_RoiSetAuto-28.zip Distance px	CONT-02m_m67_001	CONT	20	6224.76	0.453836
CONT-02m_m67_001.xlsx_RoiSetAuto-29.zip Distance px	CONT-02m_m67_001	CONT	20	7774.25	0.454438
CONT-02m_m67_001.xlsx_RoiSetAuto-3.zip Distance px	CONT-02m_m67_001	CONT	40	14759.2	0.482389
CONT-02m_m67_001.xlsx_RoiSetAuto-30.zip Distance px	CONT-02m_m67_001	CONT	24	7316.74	0.282353
CONT-02m_m67_001.xlsx_RoiSetAuto-31.zip Distance px	CONT-02m_m67_001	CONT	92	14868	0.827287
CONT-02m_m67_001.xlsx_RoiSetAuto-32.zip Distance px	CONT-02m_m67_001	CONT	32	9142.57	0.745302
CONT-02m_m67_001.xlsx_RoiSetAuto-33.zip Distance px	CONT-02m_m67_001	CONT	20	7058.3	0.440018
CONT-02m_m67_001.xlsx_RoiSetAuto-34.zip Distance px	CONT-02m_m67_001	CONT	20	9208.89	0.670231
CONT-02m_m67_001.xlsx_RoiSetAuto-35.zip Distance px	CONT-02m_m67_001	CONT	76	8672.07	0.986086
CONT-02m_m67_001.xlsx_RoiSetAuto-36.zip Distance px	CONT-02m_m67_001	CONT	64	10360.9	0.734289
CONT-02m_m67_001.xlsx_RoiSetAuto-37.zip Distance px	CONT-02m_m67_001	CONT	16	6775.81	0.159459
CONT-02m_m67_001.xlsx_RoiSetAuto-38.zip Distance px	CONT-02m_m67_001	CONT	20	10863	0.573335
CONT-02m_m67_001.xlsx_RoiSetAuto-39.zip Distance px	CONT-02m_m67_001	CONT	20	8475.35	0.621494
CONT-02m_m67_001.xlsx_RoiSetAuto-4.zip Distance px	CONT-02m_m67_001	CONT	148	10139.7	1.03165
CONT-02m_m67_001.xlsx_RoiSetAuto-40.zip Distance px	CONT-02m_m67_001	CONT	36	10462.3	0.906932
CONT-02m_m67_001.xlsx_RoiSetAuto-41.zip Distance px	CONT-02m_m67_001	CONT	24	9073.52	0.486355
CONT-02m_m67_001.xlsx_RoiSetAuto-42.zip Distance px	CONT-02m_m67_001	CONT	32	13272.8	0.818605
CONT-02m_m67_001.xlsx_RoiSetAuto-43.zip Distance px	CONT-02m_m67_001	CONT	40	8196.02	0.744675
CONT-02m_m67_001.xlsx_RoiSetAuto-44.zip Distance px	CONT-02m_m67_001	CONT	48	8586.73	0.714676
CONT-02m_m67_001.xlsx_RoiSetAuto-45.zip Distance px	CONT-02m_m67_001	CONT	28	8271.07	0.407998
CONT-02m_m67_001.xlsx_RoiSetAuto-46.zip Distance px	CONT-02m_m67_001	CONT	20	8181.1	0.408154
CONT-02m_m67_001.xlsx_RoiSetAuto-47.zip Distance px	CONT-02m_m67_001	CONT	28	10183.8	0.935448
CONT-02m_m67_001.xlsx_RoiSetAuto-48.zip Distance px	CONT-02m_m67_001	CONT	40	8986.48	0.46341
CONT-02m_m67_001.xlsx_RoiSetAuto-49.zip Distance px	CONT-02m_m67_001	CONT	68	10704.4	0.575586
CONT-02m_m67_001.xlsx_RoiSetAuto-5.zip Distance px	CONT-02m_m67_001	CONT	96	13989.1	1.27624
CONT-02m_m67_001.xlsx_RoiSetAuto-50.zip Distance px	CONT-02m_m67_001	CONT	20	8771.9	0.498852
CONT-02m_m67_001.xlsx_RoiSetAuto-51.zip Distance px	CONT-02m_m67_001	CONT	104	11261.4	0.80643
CONT-02m_m67_001.xlsx_RoiSetAuto-52.zip Distance px	CONT-02m_m67_001	CONT	24	8089.98	0.519126
CONT-02m_m67_001.xlsx_RoiSetAuto-53.zip Distance px	CONT-02m_m67_001	CONT	16	7554.36	0.17527
CONT-02m_m67_001.xlsx_RoiSetAuto-54.zip Distance px	CONT-02m_m67_001	CONT	16	9033.71	0.378714
CONT-02m_m67_001.xlsx_RoiSetAuto-55.zip Distance px	CONT-02m_m67_001	CONT	20	10396	0.452193
CONT-02m_m67_001.xlsx_RoiSetAuto-56.zip Distance px	CONT-02m_m67_001	CONT	24	7994.49	0.671243
CONT-02m_m67_001.xlsx_RoiSetAuto-57.zip Distance px	CONT-02m_m67_001	CONT	20	8868.43	0.392889
CONT-02m_m67_001.xlsx_RoiSetAuto-59.zip Distance px	CONT-02m_m67_001	CONT	16	9949.15	0.449823
CONT-02m_m67_001.xlsx_RoiSetAuto-6.zip Distance px	CONT-02m_m67_001	CONT	276	13459.8	1.07526
CONT-02m_m67_001.xlsx_RoiSetAuto-60.zip Distance px	CONT-02m_m67_001	CONT	20	10009.4	0.482129
CONT-02m_m67_001.xlsx_RoiSetAuto-61.zip Distance px	CONT-02m_m67_001	CONT	36	8979.21	0.362407
CONT-02m_m67_001.xlsx_RoiSetAuto-62.zip Distance px	CONT-02m_m67_001	CONT	24	10429.9	0.437818
CONT-02m_m67_001.xlsx_RoiSetAuto-63.zip Distance px	CONT-02m_m67_001	CONT	16	7520.6	0.199228
CONT-02m_m67_001.xlsx_RoiSetAuto-64.zip Distance px	CONT-02m_m67_001	CONT	92	12971.6	0.747973
CONT-02m_m67_001.xlsx_RoiSetAuto-65.zip Distance px	CONT-02m_m67_001	CONT	28	8876.22	0.509912
CONT-02m_m67_001.xlsx_RoiSetAuto-66.zip Distance px	CONT-02m_m67_001	CONT	48	11088.9	0.830872
CONT-02m_m67_001.xlsx_RoiSetAuto-67.zip Distance px	CONT-02m_m67_001	CONT	80	12598.7	0.84959
CONT-02m_m67_001.xlsx_RoiSetAuto-68.zip Distance px	CONT-02m_m67_001	CONT	24	9442.51	0.331405
CONT-02m_m67_001.xlsx_RoiSetAuto-69.zip Distance px	CONT-02m_m67_001	CONT	80	9297.83	0.785245
CONT-02m_m67_001.xlsx_RoiSetAuto-7.zip Distance px	CONT-02m_m67_001	CONT	20	7010.31	0.275078
CONT-02m_m67_001.xlsx_RoiSetAuto-70.zip Distance px	CONT-02m_m67_001	CONT	20	9984.18	0.790909
CONT-02m_m67_001.xlsx_RoiSetAuto-71.zip Distance px	CONT-02m_m67_001	CONT	72	18718.8	0.959017
CONT-02m_m67_001.xlsx_RoiSetAuto-72.zip Distance px	CONT-02m_m67_001	CONT	60	7841.26	0.659439
CONT-02m_m67_001.xlsx_RoiSetAuto-73.zip Distance px	CONT-02m_m67_001	CONT	28	10246	0.395458
CONT-02m_m67_001.xlsx_RoiSetAuto-74.zip Distance px	CONT-02m_m67_001	CONT	60	14463.9	0.875764
CONT-02m_m67_001.xlsx_RoiSetAuto-75.zip Distance px	CONT-02m_m67_001	CONT	68	10564.1	0.824692
CONT-02m_m67_001.xlsx_RoiSetAuto-76.zip Distance px	CONT-02m_m67_001	CONT	24	10345.9	0.337235
CONT-02m_m67_001.xlsx_RoiSetAuto-77.zip Distance px	CONT-02m_m67_001	CONT	44	11114.6	0.714719
CONT-02m_m67_001.xlsx_RoiSetAuto-78.zip Distance px	CONT-02m_m67_001	CONT	16	7719.36	0.716143
CONT-02m_m67_001.xlsx_RoiSetAuto-79.zip Distance px	CONT-02m_m67_001	CONT	28	14327.3	0.634036
CONT-02m_m67_001.xlsx_RoiSetAuto-8.zip Distance px	CONT-02m_m67_001	CONT	32	7327.9	0.658476
CONT-02m_m67_001.xlsx_RoiSetAuto-80.zip Distance px	CONT-02m_m67_001	CONT	36	10341.9	0.389332
CONT-02m_m67_001.xlsx_RoiSetAuto-81.zip Distance px	CONT-02m_m67_001	CONT	32	14701.4	0.785282
CONT-02m_m67_001.xlsx_RoiSetAuto-82.zip Distance px	CONT-02m_m67_001	CONT	16	8592.37	0.259918
CONT-02m_m67_001.xlsx_RoiSetAuto-83.zip Distance px	CONT-02m_m67_001	CONT	16	8658.14	0.618007
CONT-02m_m67_001.xlsx_RoiSetAuto-84.zip Distance px	CONT-02m_m67_001	CONT	16	9717.73	0.273907
CONT-02m_m67_001.xlsx_RoiSetAuto-85.zip Distance px	CONT-02m_m67_001	CONT	16	14691.7	0.520729
CONT-02m_m67_001.xlsx_RoiSetAuto-9.zip Distance px	CONT-02m_m67_001	CONT	44	10747.5	0.721685
CONT-02m_m67_002.xlsx_RoiSetAuto-1.zip Distance px	CONT-02m_m67_002	CONT	44	8761.36	0.847158
CONT-02m_m67_002.xlsx_RoiSetAuto-10.zip Distance px	CONT-02m_m67_002	CONT	140	6667.48	1.38906
CONT-02m_m67_002.xlsx_RoiSetAuto-11.zip Distance px	CONT-02m_m67_002	CONT	16	4128.52	0.453299
CONT-02m_m67_002.xlsx_RoiSetAuto-12.zip Distance px	CONT-02m_m67_002	CONT	16	4332.4	0.263994
CONT-02m_m67_002.xlsx_RoiSetAuto-13.zip Distance px	CONT-02m_m67_002	CONT	40	3485.2	0.934585
CONT-02m_m67_002.xlsx_RoiSetAuto-14.zip Distance px	CONT-02m_m67_002	CONT	184	4902.4	0.806989
CONT-02m_m67_002.xlsx_RoiSetAuto-15.zip Distance px	CONT-02m_m67_002	CONT	28	4208.36	0.575461
CONT-02m_m67_002.xlsx_RoiSetAuto-16.zip Distance px	CONT-02m_m67_002	CONT	44	6866.62	0.616947
CONT-02m_m67_002.xlsx_RoiSetAuto-17.zip Distance px	CONT-02m_m67_002	CONT	112	5083	1.46956
CONT-02m_m67_002.xlsx_RoiSetAuto-18.zip Distance px	CONT-02m_m67_002	CONT	20	3967.68	0.288711
CONT-02m_m67_002.xlsx_RoiSetAuto-19.zip Distance px	CONT-02m_m67_002	CONT	16	4189.86	0.283253
CONT-02m_m67_002.xlsx_RoiSetAuto-2.zip Distance px	CONT-02m_m67_002	CONT	72	6796.29	1.02627
CONT-02m_m67_002.xlsx_RoiSetAuto-20.zip Distance px	CONT-02m_m67_002	CONT	188	6565.19	1.39729
CONT-02m_m67_002.xlsx_RoiSetAuto-22.zip Distance px	CONT-02m_m67_002	CONT	36	6936.78	0.679278
CONT-02m_m67_002.xlsx_RoiSetAuto-23.zip Distance px	CONT-02m_m67_002	CONT	52	5321.19	0.686817
CONT-02m_m67_002.xlsx_RoiSetAuto-24.zip Distance px	CONT-02m_m67_002	CONT	96	5405.91	0.810798
CONT-02m_m67_002.xlsx_RoiSetAuto-26.zip Distance px	CONT-02m_m67_002	CONT	28	4851.58	0.601106
CONT-02m_m67_002.xlsx_RoiSetAuto-27.zip Distance px	CONT-02m_m67_002	CONT	16	5310.56	0.393716
CONT-02m_m67_002.xlsx_RoiSetAuto-28.zip Distance px	CONT-02m_m67_002	CONT	20	3878.55	1.16308
CONT-02m_m67_002.xlsx_RoiSetAuto-29.zip Distance px	CONT-02m_m67_002	CONT	32	4308.1	0.406036
CONT-02m_m67_002.xlsx_RoiSetAuto-3.zip Distance px	CONT-02m_m67_002	CONT	44	6030.52	0.650572
CONT-02m_m67_002.xlsx_RoiSetAuto-30.zip Distance px	CONT-02m_m67_002	CONT	16	3650.48	0.4555
CONT-02m_m67_002.xlsx_RoiSetAuto-4.zip Distance px	CONT-02m_m67_002	CONT	152	6701.44	1.45209
CONT-02m_m67_002.xlsx_RoiSetAuto-5.zip Distance px	CONT-02m_m67_002	CONT	28	4573.95	0.531445
CONT-02m_m67_002.xlsx_RoiSetAuto-6.zip Distance px	CONT-02m_m67_002	CONT	40	4079.79	0.447008
CONT-02m_m67_002.xlsx_RoiSetAuto-7.zip Distance px	CONT-02m_m67_002	CONT	100	6041.93	1.12207
CONT-02m_m67_002.xlsx_RoiSetAuto-8.zip Distance px	CONT-02m_m67_002	CONT	56	4552.47	0.788942
CONT-02m_m67_002.xlsx_RoiSetAuto-9.zip Distance px	CONT-02m_m67_002	CONT	56	6168.04	1.13725
CONT-02m_m67_003.xlsx_RoiSetAuto-1.zip Distance px	CONT-02m_m67_003	CONT	20	10394.4	0.281194
CONT-02m_m67_003.xlsx_RoiSetAuto-11.zip Distance px	CONT-02m_m67_003	CONT	40	11281.5	0.370847
CONT-02m_m67_003.xlsx_RoiSetAuto-12.zip Distance px	CONT-02m_m67_003	CONT	96	17447	1.05681
CONT-02m_m67_003.xlsx_RoiSetAuto-13.zip Distance px	CONT-02m_m67_003	CONT	76	18617.4	1.54303
CONT-02m_m67_003.xlsx_RoiSetAuto-14.zip Distance px	CONT-02m_m67_003	CONT	36	16208.4	1.0761
CONT-02m_m67_003.xlsx_RoiSetAuto-19.zip Distance px	CONT-02m_m67_003	CONT	44	15836.4	0.658826
CONT-02m_m67_003.xlsx_RoiSetAuto-23.zip Distance px	CONT-02m_m67_003	CONT	44	17937.4	0.747977
CONT-02m_m67_003.xlsx_RoiSetAuto-24.zip Distance px	CONT-02m_m67_003	CONT	20	9195.29	0.104095
CONT-02m_m67_003.xlsx_RoiSetAuto-25.zip Distance px	CONT-02m_m67_003	CONT	24	10499.9	0.521055
CONT-02m_m67_003.xlsx_RoiSetAuto-26.zip Distance px	CONT-02m_m67_003	CONT	32	15669.8	0.67393
CONT-02m_m67_003.xlsx_RoiSetAuto-27.zip Distance px	CONT-02m_m67_003	CONT	56	14619.3	0.625838
CONT-02m_m67_003.xlsx_RoiSetAuto-28.zip Distance px	CONT-02m_m67_003	CONT	68	19939.9	0.995168
CONT-02m_m67_003.xlsx_RoiSetAuto-29.zip Distance px	CONT-02m_m67_003	CONT	72	13047.1	0.67609
CONT-02m_m67_003.xlsx_RoiSetAuto-3.zip Distance px	CONT-02m_m67_003	CONT	80	19588.4	1.10304
CONT-02m_m67_003.xlsx_RoiSetAuto-30.zip Distance px	CONT-02m_m67_003	CONT	20	9095.88	0.679979
CONT-02m_m67_003.xlsx_RoiSetAuto-33.zip Distance px	CONT-02m_m67_003	CONT	20	12421.4	0.494684
CONT-02m_m67_003.xlsx_RoiSetAuto-35.zip Distance px	CONT-02m_m67_003	CONT	20	9865.65	0.562861
CONT-02m_m67_003.xlsx_RoiSetAuto-36.zip Distance px	CONT-02m_m67_003	CONT	112	19248.7	1.28011
CONT-02m_m67_003.xlsx_RoiSetAuto-39.zip Distance px	CONT-02m_m67_003	CONT	52	12220.2	0.584182
CONT-02m_m67_003.xlsx_RoiSetAuto-40.zip Distance px	CONT-02m_m67_003	CONT	16	11818.5	0.370568
CONT-02m_m67_003.xlsx_RoiSetAuto-45.zip Distance px	CONT-02m_m67_003	CONT	32	14033.8	1.2355
CONT-02m_m67_003.xlsx_RoiSetAuto-47.zip Distance px	CONT-02m_m67_003	CONT	32	13636	0.441795
CONT-02m_m67_003.xlsx_RoiSetAuto-48.zip Distance px	CONT-02m_m67_003	CONT	68	18846	1.09907
CONT-02m_m67_003.xlsx_RoiSetAuto-49.zip Distance px	CONT-02m_m67_003	CONT	68	14860.9	0.902185
CONT-02m_m67_003.xlsx_RoiSetAuto-5.zip Distance px	CONT-02m_m67_003	CONT	48	20691.4	0.919562
CONT-02m_m67_003.xlsx_RoiSetAuto-52.zip Distance px	CONT-02m_m67_003	CONT	24	12843.8	0.464859
CONT-02m_m67_003.xlsx_RoiSetAuto-53.zip Distance px	CONT-02m_m67_003	CONT	32	12782.5	0.776083
CONT-02m_m67_003.xlsx_RoiSetAuto-54.zip Distance px	CONT-02m_m67_003	CONT	16	10850	1.00217
CONT-02m_m67_003.xlsx_RoiSetAuto-56.zip Distance px	CONT-02m_m67_003	CONT	56	18364.2	0.767732
CONT-02m_m67_003.xlsx_RoiSetAuto-59.zip Distance px	CONT-02m_m67_003	CONT	68	19413.8	0.699196
CONT-02m_m67_003.xlsx_RoiSetAuto-6.zip Distance px	CONT-02m_m67_003	CONT	88	13957.5	0.995791
CONT-02m_m67_003.xlsx_RoiSetAuto-61.zip Distance px	CONT-02m_m67_003	CONT	20	13465.3	0.451915
CONT-02m_m67_003.xlsx_RoiSetAuto-62.zip Distance px	CONT-02m_m67_003	CONT	32	16209.4	0.37127
CONT-02m_m67_003.xlsx_RoiSetAuto-63.zip Distance px	CONT-02m_m67_003	CONT	20	15330.9	0.574865
CONT-02m_m67_003.xlsx_RoiSetAuto-8.zip Distance px	CONT-02m_m67_003	CONT	48	14147.4	0.893424
CONT-03m_m67_001.xlsx_RoiSetAuto-10.zip Distance px	CONT-03m_m67_001	CONT	20	4799.34	0.320035
CONT-03m_m67_001.xlsx_RoiSetAuto-11.zip Distance px	CONT-03m_m67_001	CONT	24	4999.28	0.920632
CONT-03m_m67_001.xlsx_RoiSetAuto-16.zip Distance px	CONT-03m_m67_001	CONT	56	5836.82	0.536172
CONT-03m_m67_001.xlsx_RoiSetAuto-19.zip Distance px	CONT-03m_m67_001	CONT	20	4640.91	0.261093
CONT-03m_m67_001.xlsx_RoiSetAuto-2.zip Distance px	CONT-03m_m67_001	CONT	152	8869.25	1.34951
CONT-03m_m67_001.xlsx_RoiSetAuto-21.zip Distance px	CONT-03m_m67_001	CONT	28	5074.48	0.876254
CONT-03m_m67_001.xlsx_RoiSetAuto-22.zip Distance px	CONT-03m_m67_001	CONT	28	6446.36	0.846114
CONT-03m_m67_001.xlsx_RoiSetAuto-23.zip Distance px	CONT-03m_m67_001	CONT	28	5998.4	0.894797
CONT-03m_m67_001.xlsx_RoiSetAuto-24.zip Distance px	CONT-03m_m67_001	CONT	24	5890.64	0.357393
CONT-03m_m67_001.xlsx_RoiSetAuto-27.zip Distance px	CONT-03m_m67_001	CONT	20	4420.16	0.311997
CONT-03m_m67_001.xlsx_RoiSetAuto-29.zip Distance px	CONT-03m_m67_001	CONT	24	6557.64	0.255489
CONT-03m_m67_001.xlsx_RoiSetAuto-3.zip Distance px	CONT-03m_m67_001	CONT	140	8729.59	1.16239
CONT-03m_m67_001.xlsx_RoiSetAuto-30.zip Distance px	CONT-03m_m67_001	CONT	28	6528.51	0.696617
CONT-03m_m67_001.xlsx_RoiSetAuto-32.zip Distance px	CONT-03m_m67_001	CONT	84	7890.47	0.987008
CONT-03m_m67_001.xlsx_RoiSetAuto-33.zip Distance px	CONT-03m_m67_001	CONT	28	5317.47	0.855541
CONT-03m_m67_001.xlsx_RoiSetAuto-34.zip Distance px	CONT-03m_m67_001	CONT	20	4244.67	0.708898
CONT-03m_m67_001.xlsx_RoiSetAuto-36.zip Distance px	CONT-03m_m67_001	CONT	32	5327.8	0.659144
CONT-03m_m67_001.xlsx_RoiSetAuto-37.zip Distance px	CONT-03m_m67_001	CONT	48	5721.25	0.899363
CONT-03m_m67_001.xlsx_RoiSetAuto-38.zip Distance px	CONT-03m_m67_001	CONT	20	4907.15	0.625272
CONT-03m_m67_001.xlsx_RoiSetAuto-39.zip Distance px	CONT-03m_m67_001	CONT	52	5114.47	0.547235
CONT-03m_m67_001.xlsx_RoiSetAuto-4.zip Distance px	CONT-03m_m67_001	CONT	20	5004.43	0.735965
CONT-03m_m67_001.xlsx_RoiSetAuto-40.zip Distance px	CONT-03m_m67_001	CONT	36	6178.45	1.04015
CONT-03m_m67_001.xlsx_RoiSetAuto-41.zip Distance px	CONT-03m_m67_001	CONT	20	5370.27	0.426615
CONT-03m_m67_001.xlsx_RoiSetAuto-42.zip Distance px	CONT-03m_m67_001	CONT	28	4163.54	0.297453
CONT-03m_m67_001.xlsx_RoiSetAuto-43.zip Distance px	CONT-03m_m67_001	CONT	48	5972.17	0.830371
CONT-03m_m67_001.xlsx_RoiSetAuto-44.zip Distance px	CONT-03m_m67_001	CONT	48	5636.62	0.598966
CONT-03m_m67_001.xlsx_RoiSetAuto-49.zip Distance px	CONT-03m_m67_001	CONT	60	6332.11	0.715045
CONT-03m_m67_001.xlsx_RoiSetAuto-50.zip Distance px	CONT-03m_m67_001	CONT	80	9179.18	1.0279
CONT-03m_m67_001.xlsx_RoiSetAuto-52.zip Distance px	CONT-03m_m67_001	CONT	92	6756.3	1.20629
CONT-03m_m67_001.xlsx_RoiSetAuto-53.zip Distance px	CONT-03m_m67_001	CONT	24	6091.97	0.471667
CONT-03m_m67_001.xlsx_RoiSetAuto-54.zip Distance px	CONT-03m_m67_001	CONT	80	5525.11	0.78945
CONT-03m_m67_001.xlsx_RoiSetAuto-55.zip Distance px	CONT-03m_m67_001	CONT	56	6960.9	1.11585
CONT-03m_m67_001.xlsx_RoiSetAuto-59.zip Distance px	CONT-03m_m67_001	CONT	44	12578.9	0.679636
CONT-03m_m67_001.xlsx_RoiSetAuto-6.zip Distance px	CONT-03m_m67_001	CONT	268	10612.6	0.864565
CONT-03m_m67_001.xlsx_RoiSetAuto-60.zip Distance px	CONT-03m_m67_001	CONT	28	5738.5	0.523706
CONT-03m_m67_001.xlsx_RoiSetAuto-61.zip Distance px	CONT-03m_m67_001	CONT	48	6067.63	0.783974
CONT-03m_m67_001.xlsx_RoiSetAuto-62.zip Distance px	CONT-03m_m67_001	CONT	20	5128.26	0.208356
CONT-03m_m67_001.xlsx_RoiSetAuto-63.zip Distance px	CONT-03m_m67_001	CONT	24	5308.61	0.365892
CONT-03m_m67_001.xlsx_RoiSetAuto-64.zip Distance px	CONT-03m_m67_001	CONT	92	8827.22	1.12239
CONT-03m_m67_001.xlsx_RoiSetAuto-65.zip Distance px	CONT-03m_m67_001	CONT	48	5962.01	0.685043
CONT-03m_m67_001.xlsx_RoiSetAuto-66.zip Distance px	CONT-03m_m67_001	CONT	20	5682.96	0.516515
CONT-03m_m67_001.xlsx_RoiSetAuto-68.zip Distance px	CONT-03m_m67_001	CONT	104	11116.7	0.710865
CONT-03m_m67_001.xlsx_RoiSetAuto-7.zip Distance px	CONT-03m_m67_001	CONT	16	5541.21	0.411587
CONT-03m_m67_001.xlsx_RoiSetAuto-70.zip Distance px	CONT-03m_m67_001	CONT	24	5067	0.68144
CONT-03m_m67_001.xlsx_RoiSetAuto-71.zip Distance px	CONT-03m_m67_001	CONT	20	5168.9	0.283802
CONT-03m_m67_001.xlsx_RoiSetAuto-72.zip Distance px	CONT-03m_m67_001	CONT	20	4189.33	0.258334
CONT-03m_m67_001.xlsx_RoiSetAuto-73.zip Distance px	CONT-03m_m67_001	CONT	84	7362.81	1.3373
CONT-03m_m67_001.xlsx_RoiSetAuto-74.zip Distance px	CONT-03m_m67_001	CONT	40	6141.58	0.532458
CONT-03m_m67_001.xlsx_RoiSetAuto-75.zip Distance px	CONT-03m_m67_001	CONT	84	7171.9	1.4423
CONT-03m_m67_001.xlsx_RoiSetAuto-76.zip Distance px	CONT-03m_m67_001	CONT	28	4982.87	0.392809
CONT-03m_m67_001.xlsx_RoiSetAuto-77.zip Distance px	CONT-03m_m67_001	CONT	36	7122.24	0.465447
CONT-03m_m67_001.xlsx_RoiSetAuto-78.zip Distance px	CONT-03m_m67_001	CONT	16	4324.44	0.824874
CONT-03m_m67_001.xlsx_RoiSetAuto-8.zip Distance px	CONT-03m_m67_001	CONT	48	5106.8	0.703099
CONT-03m_m67_001.xlsx_RoiSetAuto-81.zip Distance px	CONT-03m_m67_001	CONT	20	4544.32	0.417289
CONT-03m_m67_001.xlsx_RoiSetAuto-82.zip Distance px	CONT-03m_m67_001	CONT	40	6939.25	0.903666
CONT-03m_m67_001.xlsx_RoiSetAuto-84.zip Distance px	CONT-03m_m67_001	CONT	20	5642.93	0.556912
CONT-03m_m67_001.xlsx_RoiSetAuto-85.zip Distance px	CONT-03m_m67_001	CONT	36	7720.98	0.70716
CONT-03m_m67_001.xlsx_RoiSetAuto-87.zip Distance px	CONT-03m_m67_001	CONT	24	6081.75	0.653623
CONT-03m_m67_001.xlsx_RoiSetAuto-88.zip Distance px	CONT-03m_m67_001	CONT	16	7884.74	0.686223
CONT-03m_m67_002.xlsx_RoiSetAuto-1.zip Distance px	CONT-03m_m67_002	CONT	44	1999.98	1.44927
CONT-03m_m67_002.xlsx_RoiSetAuto-10.zip Distance px	CONT-03m_m67_002	CONT	28	1922.18	0.368443
CONT-03m_m67_002.xlsx_RoiSetAuto-11.zip Distance px	CONT-03m_m67_002	CONT	28	1536.56	0.658701
CONT-03m_m67_002.xlsx_RoiSetAuto-12.zip Distance px	CONT-03m_m67_002	CONT	16	1446.95	0.511233
CONT-03m_m67_002.xlsx_RoiSetAuto-13.zip Distance px	CONT-03m_m67_002	CONT	24	1390.18	0.363372
CONT-03m_m67_002.xlsx_RoiSetAuto-17.zip Distance px	CONT-03m_m67_002	CONT	24	1471.45	0.729851
CONT-03m_m67_002.xlsx_RoiSetAuto-18.zip Distance px	CONT-03m_m67_002	CONT	52	1683.21	1.04291
CONT-03m_m67_002.xlsx_RoiSetAuto-19.zip Distance px	CONT-03m_m67_002	CONT	16	1382.19	0.367468
CONT-03m_m67_002.xlsx_RoiSetAuto-2.zip Distance px	CONT-03m_m67_002	CONT	32	1934	1.33643
CONT-03m_m67_002.xlsx_RoiSetAuto-20.zip Distance px	CONT-03m_m67_002	CONT	16	1863.59	0.293381
CONT-03m_m67_002.xlsx_RoiSetAuto-21.zip Distance px	CONT-03m_m67_002	CONT	48	1432.69	0.758817
CONT-03m_m67_002.xlsx_RoiSetAuto-22.zip Distance px	CONT-03m_m67_002	CONT	40	1622.51	1.5861
CONT-03m_m67_002.xlsx_RoiSetAuto-23.zip Distance px	CONT-03m_m67_002	CONT	16	1761.84	0.553384
CONT-03m_m67_002.xlsx_RoiSetAuto-24.zip Distance px	CONT-03m_m67_002	CONT	24	1340.39	0.905187
CONT-03m_m67_002.xlsx_RoiSetAuto-25.zip Distance px	CONT-03m_m67_002	CONT	44	1722.57	0.952922
CONT-03m_m67_002.xlsx_RoiSetAuto-26.zip Distance px	CONT-03m_m67_002	CONT	36	1677.59	0.688284
CONT-03m_m67_002.xlsx_RoiSetAuto-27.zip Distance px	CONT-03m_m67_002	CONT	24	1467.99	0.651034
CONT-03m_m67_002.xlsx_RoiSetAuto-28.zip Distance px	CONT-03m_m67_002	CONT	52	1700.09	0.745925
CONT-03m_m67_002.xlsx_RoiSetAuto-29.zip Distance px	CONT-03m_m67_002	CONT	28	1595.34	0.581949
CONT-03m_m67_002.xlsx_RoiSetAuto-32.zip Distance px	CONT-03m_m67_002	CONT	16	1370.32	0.323137
CONT-03m_m67_002.xlsx_RoiSetAuto-33.zip Distance px	CONT-03m_m67_002	CONT	20	1263.83	0.954572
CONT-03m_m67_002.xlsx_RoiSetAuto-34.zip Distance px	CONT-03m_m67_002	CONT	28	1483.11	0.614487
CONT-03m_m67_002.xlsx_RoiSetAuto-36.zip Distance px	CONT-03m_m67_002	CONT	36	1627.55	0.784224
CONT-03m_m67_002.xlsx_RoiSetAuto-37.zip Distance px	CONT-03m_m67_002	CONT	40	2213.53	0.785943
CONT-03m_m67_002.xlsx_RoiSetAuto-38.zip Distance px	CONT-03m_m67_002	CONT	16	1766.01	0.530713
CONT-03m_m67_002.xlsx_RoiSetAuto-4.zip Distance px	CONT-03m_m67_002	CONT	24	1956.81	0.449267
CONT-03m_m67_002.xlsx_RoiSetAuto-40.zip Distance px	CONT-03m_m67_002	CONT	20	1455.59	1.07434
CONT-03m_m67_002.xlsx_RoiSetAuto-42.zip Distance px	CONT-03m_m67_002	CONT	16	1639.07	0.35751
CONT-03m_m67_002.xlsx_RoiSetAuto-43.zip Distance px	CONT-03m_m67_002	CONT	20	1466.27	0.608931
CONT-03m_m67_002.xlsx_RoiSetAuto-5.zip Distance px	CONT-03m_m67_002	CONT	16	1649.79	1.03304
CONT-03m_m67_002.xlsx_RoiSetAuto-6.zip Distance px	CONT-03m_m67_002	CONT	16	2070.21	0.431374
CONT-03m_m67_002.xlsx_RoiSetAuto-7.zip Distance px	CONT-03m_m67_002	CONT	32	1753.61	0.513248
CONT-03m_m67_002.xlsx_RoiSetAuto-8.zip Distance px	CONT-03m_m67_002	CONT	24	2092.26	0.614867
CONT-03m_m67_002.xlsx_RoiSetAuto-9.zip Distance px	CONT-03m_m67_002	CONT	16	1653.23	1.16533
CONT-03m_m67_003.xlsx_RoiSetAuto-1.zip Distance px	CONT-03m_m67_003	CONT	124	5599.6	1.23408
CONT-03m_m67_003.xlsx_RoiSetAuto-10.zip Distance px	CONT-03m_m67_003	CONT	56	6695.31	0.972099
CONT-03m_m67_003.xlsx_RoiSetAuto-11.zip Distance px	CONT-03m_m67_003	CONT	104	5342.31	1.28045
CONT-03m_m67_003.xlsx_RoiSetAuto-12.zip Distance px	CONT-03m_m67_003	CONT	56	4234.71	0.924675
CONT-03m_m67_003.xlsx_RoiSetAuto-13.zip Distance px	CONT-03m_m67_003	CONT	136	9601.99	1.21289
CONT-03m_m67_003.xlsx_RoiSetAuto-14.zip Distance px	CONT-03m_m67_003	CONT	36	3809.89	1.06529
CONT-03m_m67_003.xlsx_RoiSetAuto-15.zip Distance px	CONT-03m_m67_003	CONT	16	5556.35	0.661593
CONT-03m_m67_003.xlsx_RoiSetAuto-16.zip Distance px	CONT-03m_m67_003	CONT	20	3424.65	0.516933
CONT-03m_m67_003.xlsx_RoiSetAuto-17.zip Distance px	CONT-03m_m67_003	CONT	44	3338.52	0.729098
CONT-03m_m67_003.xlsx_RoiSetAuto-18.zip Distance px	CONT-03m_m67_003	CONT	20	2996.01	0.956855
CONT-03m_m67_003.xlsx_RoiSetAuto-19.zip Distance px	CONT-03m_m67_003	CONT	16	3845.39	0.484025
CONT-03m_m67_003.xlsx_RoiSetAuto-2.zip Distance px	CONT-03m_m67_003	CONT	60	4912.22	0.585536
CONT-03m_m67_003.xlsx_RoiSetAuto-21.zip Distance px	CONT-03m_m67_003	CONT	28	3572.25	0.556495
CONT-03m_m67_003.xlsx_RoiSetAuto-22.zip Distance px	CONT-03m_m67_003	CONT	24	3143.12	0.338484
CONT-03m_m67_003.xlsx_RoiSetAuto-23.zip Distance px	CONT-03m_m67_003	CONT	60	5174.99	0.988235
CONT-03m_m67_003.xlsx_RoiSetAuto-24.zip Distance px	CONT-03m_m67_003	CONT	108	3461.08	0.907635
CONT-03m_m67_003.xlsx_RoiSetAuto-25.zip Distance px	CONT-03m_m67_003	CONT	32	4686.48	0.757601
CONT-03m_m67_003.xlsx_RoiSetAuto-26.zip Distance px	CONT-03m_m67_003	CONT	16	3612.04	0.204038
CONT-03m_m67_003.xlsx_RoiSetAuto-27.zip Distance px	CONT-03m_m67_003	CONT	24	4232.83	0.800814
CONT-03m_m67_003.xlsx_RoiSetAuto-28.zip Distance px	CONT-03m_m67_003	CONT	60	4179.08	0.970781
CONT-03m_m67_003.xlsx_RoiSetAuto-29.zip Distance px	CONT-03m_m67_003	CONT	32	3754.69	0.875131
CONT-03m_m67_003.xlsx_RoiSetAuto-3.zip Distance px	CONT-03m_m67_003	CONT	52	4285.43	0.893789
CONT-03m_m67_003.xlsx_RoiSetAuto-30.zip Distance px	CONT-03m_m67_003	CONT	16	3618.4	1.14904
CONT-03m_m67_003.xlsx_RoiSetAuto-31.zip Distance px	CONT-03m_m67_003	CONT	20	3876.98	0.731185
CONT-03m_m67_003.xlsx_RoiSetAuto-32.zip Distance px	CONT-03m_m67_003	CONT	28	3544.71	1.23512
CONT-03m_m67_003.xlsx_RoiSetAuto-33.zip Distance px	CONT-03m_m67_003	CONT	48	3988.1	1.04811
CONT-03m_m67_003.xlsx_RoiSetAuto-34.zip Distance px	CONT-03m_m67_003	CONT	16	3694.58	0.81421
CONT-03m_m67_003.xlsx_RoiSetAuto-35.zip Distance px	CONT-03m_m67_003	CONT	88	5493.05	1.10287
CONT-03m_m67_003.xlsx_RoiSetAuto-36.zip Distance px	CONT-03m_m67_003	CONT	40	4034.31	0.74155
CONT-03m_m67_003.xlsx_RoiSetAuto-37.zip Distance px	CONT-03m_m67_003	CONT	60	4028.54	1.07462
CONT-03m_m67_003.xlsx_RoiSetAuto-38.zip Distance px	CONT-03m_m67_003	CONT	68	5381.13	0.89378
CONT-03m_m67_003.xlsx_RoiSetAuto-39.zip Distance px	CONT-03m_m67_003	CONT	24	3579.05	0.797855
CONT-03m_m67_003.xlsx_RoiSetAuto-4.zip Distance px	CONT-03m_m67_003	CONT	36	3123.98	0.628
CONT-03m_m67_003.xlsx_RoiSetAuto-40.zip Distance px	CONT-03m_m67_003	CONT	76	7087.28	0.862332
CONT-03m_m67_003.xlsx_RoiSetAuto-41.zip Distance px	CONT-03m_m67_003	CONT	16	3531.37	0.230834
CONT-03m_m67_003.xlsx_RoiSetAuto-42.zip Distance px	CONT-03m_m67_003	CONT	80	4087.27	0.951269
CONT-03m_m67_003.xlsx_RoiSetAuto-43.zip Distance px	CONT-03m_m67_003	CONT	44	5082.24	0.794974
CONT-03m_m67_003.xlsx_RoiSetAuto-44.zip Distance px	CONT-03m_m67_003	CONT	40	4588.72	0.766747
CONT-03m_m67_003.xlsx_RoiSetAuto-45.zip Distance px	CONT-03m_m67_003	CONT	20	3094.46	0.458247
CONT-03m_m67_003.xlsx_RoiSetAuto-46.zip Distance px	CONT-03m_m67_003	CONT	16	3178.93	0.491023
CONT-03m_m67_003.xlsx_RoiSetAuto-47.zip Distance px	CONT-03m_m67_003	CONT	40	3993.62	0.634368
CONT-03m_m67_003.xlsx_RoiSetAuto-48.zip Distance px	CONT-03m_m67_003	CONT	24	3644.45	0.475948
CONT-03m_m67_003.xlsx_RoiSetAuto-49.zip Distance px	CONT-03m_m67_003	CONT	20	4433.53	0.320557
CONT-03m_m67_003.xlsx_RoiSetAuto-5.zip Distance px	CONT-03m_m67_003	CONT	28	5796.88	0.503381
CONT-03m_m67_003.xlsx_RoiSetAuto-50.zip Distance px	CONT-03m_m67_003	CONT	72	8022.85	0.924621
CONT-03m_m67_003.xlsx_RoiSetAuto-51.zip Distance px	CONT-03m_m67_003	CONT	24	3862.49	0.440211
CONT-03m_m67_003.xlsx_RoiSetAuto-52.zip Distance px	CONT-03m_m67_003	CONT	16	3795.47	0.153882
CONT-03m_m67_003.xlsx_RoiSetAuto-53.zip Distance px	CONT-03m_m67_003	CONT	92	5096.3	1.42592
CONT-03m_m67_003.xlsx_RoiSetAuto-54.zip Distance px	CONT-03m_m67_003	CONT	24	4839.41	0.890204
CONT-03m_m67_003.xlsx_RoiSetAuto-55.zip Distance px	CONT-03m_m67_003	CONT	60	4112.22	0.900701
CONT-03m_m67_003.xlsx_RoiSetAuto-56.zip Distance px	CONT-03m_m67_003	CONT	16	4036.69	0.469592
CONT-03m_m67_003.xlsx_RoiSetAuto-57.zip Distance px	CONT-03m_m67_003	CONT	56	4268.88	0.808932
CONT-03m_m67_003.xlsx_RoiSetAuto-58.zip Distance px	CONT-03m_m67_003	CONT	100	4685.3	0.766313
CONT-03m_m67_003.xlsx_RoiSetAuto-59.zip Distance px	CONT-03m_m67_003	CONT	36	3518.01	0.686576
CONT-03m_m67_003.xlsx_RoiSetAuto-60.zip Distance px	CONT-03m_m67_003	CONT	36	3725.95	0.731932
CONT-03m_m67_003.xlsx_RoiSetAuto-61.zip Distance px	CONT-03m_m67_003	CONT	32	3802.82	0.784888
CONT-03m_m67_003.xlsx_RoiSetAuto-62.zip Distance px	CONT-03m_m67_003	CONT	72	4959.98	0.822993
CONT-03m_m67_003.xlsx_RoiSetAuto-63.zip Distance px	CONT-03m_m67_003	CONT	36	4505.41	1.45715
CONT-03m_m67_003.xlsx_RoiSetAuto-64.zip Distance px	CONT-03m_m67_003	CONT	44	5465.81	0.622291
CONT-03m_m67_003.xlsx_RoiSetAuto-65.zip Distance px	CONT-03m_m67_003	CONT	76	10947.5	1.24144
CONT-03m_m67_003.xlsx_RoiSetAuto-66.zip Distance px	CONT-03m_m67_003	CONT	24	3538.86	0.546273
CONT-03m_m67_003.xlsx_RoiSetAuto-67.zip Distance px	CONT-03m_m67_003	CONT	16	3820.13	0.38323
CONT-03m_m67_003.xlsx_RoiSetAuto-68.zip Distance px	CONT-03m_m67_003	CONT	88	7054.4	1.01875
CONT-03m_m67_003.xlsx_RoiSetAuto-69.zip Distance px	CONT-03m_m67_003	CONT	24	3785.19	1.0045
CONT-03m_m67_003.xlsx_RoiSetAuto-7.zip Distance px	CONT-03m_m67_003	CONT	360	6365.34	1.42017
CONT-03m_m67_003.xlsx_RoiSetAuto-70.zip Distance px	CONT-03m_m67_003	CONT	28	2919.03	0.711333
CONT-03m_m67_003.xlsx_RoiSetAuto-71.zip Distance px	CONT-03m_m67_003	CONT	48	2936.48	0.604157
CONT-03m_m67_003.xlsx_RoiSetAuto-72.zip Distance px	CONT-03m_m67_003	CONT	40	4751.9	0.795049
CONT-03m_m67_003.xlsx_RoiSetAuto-73.zip Distance px	CONT-03m_m67_003	CONT	28	5310.87	0.505225
CONT-03m_m67_003.xlsx_RoiSetAuto-74.zip Distance px	CONT-03m_m67_003	CONT	52	4721.54	1.04851
CONT-03m_m67_003.xlsx_RoiSetAuto-75.zip Distance px	CONT-03m_m67_003	CONT	20	4740.29	0.42965
CONT-03m_m67_003.xlsx_RoiSetAuto-76.zip Distance px	CONT-03m_m67_003	CONT	24	3660.57	0.567462
CONT-03m_m67_003.xlsx_RoiSetAuto-77.zip Distance px	CONT-03m_m67_003	CONT	28	6059.8	0.771289
CONT-03m_m67_003.xlsx_RoiSetAuto-78.zip Distance px	CONT-03m_m67_003	CONT	16	4430.17	0.727657
CONT-03m_m67_003.xlsx_RoiSetAuto-79.zip Distance px	CONT-03m_m67_003	CONT	40	4316.27	0.925114
CONT-03m_m67_003.xlsx_RoiSetAuto-8.zip Distance px	CONT-03m_m67_003	CONT	328	14026.6	0.988113
CONT-03m_m67_003.xlsx_RoiSetAuto-80.zip Distance px	CONT-03m_m67_003	CONT	16	3283.14	0.217776
CONT-03m_m67_003.xlsx_RoiSetAuto-81.zip Distance px	CONT-03m_m67_003	CONT	60	7439.82	0.781855
CONT-03m_m67_003.xlsx_RoiSetAuto-82.zip Distance px	CONT-03m_m67_003	CONT	28	3262.13	0.270271
CONT-03m_m67_003.xlsx_RoiSetAuto-83.zip Distance px	CONT-03m_m67_003	CONT	16	4346.14	0.670768
CONT-03m_m67_003.xlsx_RoiSetAuto-84.zip Distance px	CONT-03m_m67_003	CONT	40	3318.63	0.626062
CONT-03m_m67_003.xlsx_RoiSetAuto-85.zip Distance px	CONT-03m_m67_003	CONT	28	3266.01	0.677823
CONT-03m_m67_003.xlsx_RoiSetAuto-86.zip Distance px	CONT-03m_m67_003	CONT	16	5030.03	0.440563
CONT-03m_m67_003.xlsx_RoiSetAuto-87.zip Distance px	CONT-03m_m67_003	CONT	28	3869.63	0.73946
CONT-03m_m67_003.xlsx_RoiSetAuto-88.zip Distance px	CONT-03m_m67_003	CONT	28	6080.11	0.562436
CONT-03m_m67_003.xlsx_RoiSetAuto-9.zip Distance px	CONT-03m_m67_003	CONT	64	4089.26	0.981541
CONT-03m_m67_003.xlsx_RoiSetAuto-90.zip Distance px	CONT-03m_m67_003	CONT	16	4163.51	0.255764
CONT-04m_m67_001.xlsx_RoiSetAuto-1.zip Distance px	CONT-04m_m67_001	CONT	52	5983.35	0.861631
CONT-04m_m67_001.xlsx_RoiSetAuto-10.zip Distance px	CONT-04m_m67_001	CONT	24	6421.37	0.933815
CONT-04m_m67_001.xlsx_RoiSetAuto-15.zip Distance px	CONT-04m_m67_001	CONT	24	4717.39	0.592627
CONT-04m_m67_001.xlsx_RoiSetAuto-17.zip Distance px	CONT-04m_m67_001	CONT	16	4274.05	0.374821
CONT-04m_m67_001.xlsx_RoiSetAuto-18.zip Distance px	CONT-04m_m67_001	CONT	36	5351.88	0.618232
CONT-04m_m67_001.xlsx_RoiSetAuto-19.zip Distance px	CONT-04m_m67_001	CONT	92	7100.85	1.16643
CONT-04m_m67_001.xlsx_RoiSetAuto-2.zip Distance px	CONT-04m_m67_001	CONT	16	4222.05	0.51502
CONT-04m_m67_001.xlsx_RoiSetAuto-21.zip Distance px	CONT-04m_m67_001	CONT	28	6123.48	0.678225
CONT-04m_m67_001.xlsx_RoiSetAuto-22.zip Distance px	CONT-04m_m67_001	CONT	16	3427.23	0.628441
CONT-04m_m67_001.xlsx_RoiSetAuto-24.zip Distance px	CONT-04m_m67_001	CONT	76	6415.01	1.07033
CONT-04m_m67_001.xlsx_RoiSetAuto-25.zip Distance px	CONT-04m_m67_001	CONT	20	4232.36	0.431096
CONT-04m_m67_001.xlsx_RoiSetAuto-27.zip Distance px	CONT-04m_m67_001	CONT	116	8388.79	1.07853
CONT-04m_m67_001.xlsx_RoiSetAuto-28.zip Distance px	CONT-04m_m67_001	CONT	20	5250.95	0.451776
CONT-04m_m67_001.xlsx_RoiSetAuto-29.zip Distance px	CONT-04m_m67_001	CONT	16	5076.12	0.606065
CONT-04m_m67_001.xlsx_RoiSetAuto-3.zip Distance px	CONT-04m_m67_001	CONT	28	6737.38	0.651554
CONT-04m_m67_001.xlsx_RoiSetAuto-4.zip Distance px	CONT-04m_m67_001	CONT	40	7084.73	0.846091
CONT-04m_m67_001.xlsx_RoiSetAuto-5.zip Distance px	CONT-04m_m67_001	CONT	20	4618.69	0.291471
CONT-04m_m67_001.xlsx_RoiSetAuto-6.zip Distance px	CONT-04m_m67_001	CONT	20	3813.43	0.492875
CONT-04m_m67_001.xlsx_RoiSetAuto-7.zip Distance px	CONT-04m_m67_001	CONT	40	5475.67	0.580187
CONT-04m_m67_001.xlsx_RoiSetAuto-8.zip Distance px	CONT-04m_m67_001	CONT	36	4044.34	0.614464
CONT-04m_m67_001.xlsx_RoiSetAuto-9.zip Distance px	CONT-04m_m67_001	CONT	32	6443.84	0.851071
CONT-04m_m67_002.xlsx_RoiSetAuto-1.zip Distance px	CONT-04m_m67_002	CONT	96	20343.3	1.26476
CONT-04m_m67_002.xlsx_RoiSetAuto-12.zip Distance px	CONT-04m_m67_002	CONT	16	6375.05	0.231513
CONT-04m_m67_002.xlsx_RoiSetAuto-14.zip Distance px	CONT-04m_m67_002	CONT	44	6800.21	0.695755
CONT-04m_m67_002.xlsx_RoiSetAuto-15.zip Distance px	CONT-04m_m67_002	CONT	16	7024.5	0.211236
CONT-04m_m67_002.xlsx_RoiSetAuto-16.zip Distance px	CONT-04m_m67_002	CONT	40	6769.54	0.528515
CONT-04m_m67_002.xlsx_RoiSetAuto-17.zip Distance px	CONT-04m_m67_002	CONT	16	6785.96	0.293089
CONT-04m_m67_002.xlsx_RoiSetAuto-18.zip Distance px	CONT-04m_m67_002	CONT	24	6400.47	0.475827
CONT-04m_m67_002.xlsx_RoiSetAuto-19.zip Distance px	CONT-04m_m67_002	CONT	48	9214.12	0.668116
CONT-04m_m67_002.xlsx_RoiSetAuto-2.zip Distance px	CONT-04m_m67_002	CONT	52	9919.34	0.499089
CONT-04m_m67_002.xlsx_RoiSetAuto-20.zip Distance px	CONT-04m_m67_002	CONT	44	8412.39	0.534996
CONT-04m_m67_002.xlsx_RoiSetAuto-21.zip Distance px	CONT-04m_m67_002	CONT	80	8649.83	0.662138
CONT-04m_m67_002.xlsx_RoiSetAuto-22.zip Distance px	CONT-04m_m67_002	CONT	20	6708.22	0.319468
CONT-04m_m67_002.xlsx_RoiSetAuto-23.zip Distance px	CONT-04m_m67_002	CONT	52	8740.23	0.922381
CONT-04m_m67_002.xlsx_RoiSetAuto-24.zip Distance px	CONT-04m_m67_002	CONT	16	6056.75	0.342937
CONT-04m_m67_002.xlsx_RoiSetAuto-26.zip Distance px	CONT-04m_m67_002	CONT	128	8831.02	0.774118
CONT-04m_m67_002.xlsx_RoiSetAuto-27.zip Distance px	CONT-04m_m67_002	CONT	32	6650.71	0.497634
CONT-04m_m67_002.xlsx_RoiSetAuto-29.zip Distance px	CONT-04m_m67_002	CONT	28	6355.46	0.372825
CONT-04m_m67_002.xlsx_RoiSetAuto-3.zip Distance px	CONT-04m_m67_002	CONT	44	8986.35	1.1227
CONT-04m_m67_002.xlsx_RoiSetAuto-30.zip Distance px	CONT-04m_m67_002	CONT	84	10117.6	1.07285
CONT-04m_m67_002.xlsx_RoiSetAuto-31.zip Distance px	CONT-04m_m67_002	CONT	64	11616.9	1.04837
CONT-04m_m67_002.xlsx_RoiSetAuto-32.zip Distance px	CONT-04m_m67_002	CONT	120	13106.3	0.728513
CONT-04m_m67_002.xlsx_RoiSetAuto-33.zip Distance px	CONT-04m_m67_002	CONT	20	7525.61	0.484266
CONT-04m_m67_002.xlsx_RoiSetAuto-34.zip Distance px	CONT-04m_m67_002	CONT	16	6254.91	0.406897
CONT-04m_m67_002.xlsx_RoiSetAuto-35.zip Distance px	CONT-04m_m67_002	CONT	20	6467.44	0.389709
CONT-04m_m67_002.xlsx_RoiSetAuto-36.zip Distance px	CONT-04m_m67_002	CONT	32	10123.3	0.480983
CONT-04m_m67_002.xlsx_RoiSetAuto-37.zip Distance px	CONT-04m_m67_002	CONT	24	7795.72	0.267448
CONT-04m_m67_002.xlsx_RoiSetAuto-38.zip Distance px	CONT-04m_m67_002	CONT	28	5974.77	0.57158
CONT-04m_m67_002.xlsx_RoiSetAuto-39.zip Distance px	CONT-04m_m67_002	CONT	92	9599.57	1.08568
CONT-04m_m67_002.xlsx_RoiSetAuto-4.zip Distance px	CONT-04m_m67_002	CONT	32	5787.14	0.380014
CONT-04m_m67_002.xlsx_RoiSetAuto-40.zip Distance px	CONT-04m_m67_002	CONT	36	8659.78	0.79429
CONT-04m_m67_002.xlsx_RoiSetAuto-41.zip Distance px	CONT-04m_m67_002	CONT	20	7025.37	0.695015
CONT-04m_m67_002.xlsx_RoiSetAuto-42.zip Distance px	CONT-04m_m67_002	CONT	32	9179.93	0.963824
CONT-04m_m67_002.xlsx_RoiSetAuto-43.zip Distance px	CONT-04m_m67_002	CONT	48	9609.72	0.943069
CONT-04m_m67_002.xlsx_RoiSetAuto-44.zip Distance px	CONT-04m_m67_002	CONT	20	6116.86	0.414587
CONT-04m_m67_002.xlsx_RoiSetAuto-45.zip Distance px	CONT-04m_m67_002	CONT	44	14341.5	1.2774
CONT-04m_m67_002.xlsx_RoiSetAuto-46.zip Distance px	CONT-04m_m67_002	CONT	40	10716.9	0.505092
CONT-04m_m67_002.xlsx_RoiSetAuto-47.zip Distance px	CONT-04m_m67_002	CONT	20	5737.59	0.609552
CONT-04m_m67_002.xlsx_RoiSetAuto-48.zip Distance px	CONT-04m_m67_002	CONT	28	6078.98	0.419505
CONT-04m_m67_002.xlsx_RoiSetAuto-49.zip Distance px	CONT-04m_m67_002	CONT	24	10178.8	0.576419
CONT-04m_m67_002.xlsx_RoiSetAuto-5.zip Distance px	CONT-04m_m67_002	CONT	24	8054.37	0.684217
CONT-04m_m67_002.xlsx_RoiSetAuto-50.zip Distance px	CONT-04m_m67_002	CONT	16	8502.25	0.566762
CONT-04m_m67_002.xlsx_RoiSetAuto-51.zip Distance px	CONT-04m_m67_002	CONT	28	6265.03	0.824501
CONT-04m_m67_002.xlsx_RoiSetAuto-52.zip Distance px	CONT-04m_m67_002	CONT	24	9753.12	0.836763
CONT-04m_m67_002.xlsx_RoiSetAuto-53.zip Distance px	CONT-04m_m67_002	CONT	20	10558.8	0.702629
CONT-04m_m67_002.xlsx_RoiSetAuto-54.zip Distance px	CONT-04m_m67_002	CONT	20	6941.03	0.47658
CONT-04m_m67_002.xlsx_RoiSetAuto-6.zip Distance px	CONT-04m_m67_002	CONT	28	6552.14	0.479369
CONT-04m_m67_002.xlsx_RoiSetAuto-9.zip Distance px	CONT-04m_m67_002	CONT	88	8336.36	0.925119
CONT-05m_m67_001.xlsx_RoiSetAuto-1.zip Distance px	CONT-05m_m67_001	CONT	16	5297.82	0.484855
CONT-05m_m67_001.xlsx_RoiSetAuto-10.zip Distance px	CONT-05m_m67_001	CONT	16	7149.73	0.46558
CONT-05m_m67_001.xlsx_RoiSetAuto-11.zip Distance px	CONT-05m_m67_001	CONT	84	8738.48	0.863618
CONT-05m_m67_001.xlsx_RoiSetAuto-12.zip Distance px	CONT-05m_m67_001	CONT	56	5930.5	0.669646
CONT-05m_m67_001.xlsx_RoiSetAuto-13.zip Distance px	CONT-05m_m67_001	CONT	16	6533.95	0.278184
CONT-05m_m67_001.xlsx_RoiSetAuto-15.zip Distance px	CONT-05m_m67_001	CONT	20	6264.74	0.401687
CONT-05m_m67_001.xlsx_RoiSetAuto-16.zip Distance px	CONT-05m_m67_001	CONT	32	5327.82	0.559511
CONT-05m_m67_001.xlsx_RoiSetAuto-18.zip Distance px	CONT-05m_m67_001	CONT	40	7376.4	0.556097
CONT-05m_m67_001.xlsx_RoiSetAuto-19.zip Distance px	CONT-05m_m67_001	CONT	80	8022.68	0.778643
CONT-05m_m67_001.xlsx_RoiSetAuto-2.zip Distance px	CONT-05m_m67_001	CONT	24	6725.67	0.58847
CONT-05m_m67_001.xlsx_RoiSetAuto-20.zip Distance px	CONT-05m_m67_001	CONT	20	5571.5	0.317867
CONT-05m_m67_001.xlsx_RoiSetAuto-21.zip Distance px	CONT-05m_m67_001	CONT	84	11915.3	1.33276
CONT-05m_m67_001.xlsx_RoiSetAuto-22.zip Distance px	CONT-05m_m67_001	CONT	24	5746.67	0.669669
CONT-05m_m67_001.xlsx_RoiSetAuto-23.zip Distance px	CONT-05m_m67_001	CONT	28	6650.4	0.703292
CONT-05m_m67_001.xlsx_RoiSetAuto-24.zip Distance px	CONT-05m_m67_001	CONT	56	7574.95	0.877172
CONT-05m_m67_001.xlsx_RoiSetAuto-25.zip Distance px	CONT-05m_m67_001	CONT	56	6526.04	0.713136
CONT-05m_m67_001.xlsx_RoiSetAuto-26.zip Distance px	CONT-05m_m67_001	CONT	20	6166.97	0.300899
CONT-05m_m67_001.xlsx_RoiSetAuto-28.zip Distance px	CONT-05m_m67_001	CONT	120	10947.5	1.19115
CONT-05m_m67_001.xlsx_RoiSetAuto-29.zip Distance px	CONT-05m_m67_001	CONT	52	6808.94	0.786443
CONT-05m_m67_001.xlsx_RoiSetAuto-3.zip Distance px	CONT-05m_m67_001	CONT	232	13081.8	2.10206
CONT-05m_m67_001.xlsx_RoiSetAuto-30.zip Distance px	CONT-05m_m67_001	CONT	20	4908.17	0.149278
CONT-05m_m67_001.xlsx_RoiSetAuto-31.zip Distance px	CONT-05m_m67_001	CONT	20	5899.15	0.587977
CONT-05m_m67_001.xlsx_RoiSetAuto-32.zip Distance px	CONT-05m_m67_001	CONT	16	5601.92	0.509792
CONT-05m_m67_001.xlsx_RoiSetAuto-33.zip Distance px	CONT-05m_m67_001	CONT	28	5200.13	0.25964
CONT-05m_m67_001.xlsx_RoiSetAuto-34.zip Distance px	CONT-05m_m67_001	CONT	28	7239.45	0.580826
CONT-05m_m67_001.xlsx_RoiSetAuto-35.zip Distance px	CONT-05m_m67_001	CONT	36	6461.02	0.864805
CONT-05m_m67_001.xlsx_RoiSetAuto-38.zip Distance px	CONT-05m_m67_001	CONT	20	5467.03	0.406427
CONT-05m_m67_001.xlsx_RoiSetAuto-39.zip Distance px	CONT-05m_m67_001	CONT	20	6568.69	0.495213
CONT-05m_m67_001.xlsx_RoiSetAuto-4.zip Distance px	CONT-05m_m67_001	CONT	156	12601.7	0.946995
CONT-05m_m67_001.xlsx_RoiSetAuto-40.zip Distance px	CONT-05m_m67_001	CONT	52	8019.88	0.916765
CONT-05m_m67_001.xlsx_RoiSetAuto-41.zip Distance px	CONT-05m_m67_001	CONT	36	7013.47	0.831589
CONT-05m_m67_001.xlsx_RoiSetAuto-42.zip Distance px	CONT-05m_m67_001	CONT	32	5593.64	1.24532
CONT-05m_m67_001.xlsx_RoiSetAuto-43.zip Distance px	CONT-05m_m67_001	CONT	16	4841.62	0.258962
CONT-05m_m67_001.xlsx_RoiSetAuto-44.zip Distance px	CONT-05m_m67_001	CONT	88	7260.49	0.98699
CONT-05m_m67_001.xlsx_RoiSetAuto-47.zip Distance px	CONT-05m_m67_001	CONT	16	5843.38	0.368185
CONT-05m_m67_001.xlsx_RoiSetAuto-48.zip Distance px	CONT-05m_m67_001	CONT	36	5619.47	0.479793
CONT-05m_m67_001.xlsx_RoiSetAuto-49.zip Distance px	CONT-05m_m67_001	CONT	116	9107.77	0.81739
CONT-05m_m67_001.xlsx_RoiSetAuto-5.zip Distance px	CONT-05m_m67_001	CONT	56	6654.58	0.495222
CONT-05m_m67_001.xlsx_RoiSetAuto-50.zip Distance px	CONT-05m_m67_001	CONT	44	6838.78	0.494201
CONT-05m_m67_001.xlsx_RoiSetAuto-51.zip Distance px	CONT-05m_m67_001	CONT	24	5762	0.575886
CONT-05m_m67_001.xlsx_RoiSetAuto-52.zip Distance px	CONT-05m_m67_001	CONT	24	4691.62	0.345356
CONT-05m_m67_001.xlsx_RoiSetAuto-53.zip Distance px	CONT-05m_m67_001	CONT	20	6017.24	0.682544
CONT-05m_m67_001.xlsx_RoiSetAuto-54.zip Distance px	CONT-05m_m67_001	CONT	68	5868.39	0.641163
CONT-05m_m67_001.xlsx_RoiSetAuto-55.zip Distance px	CONT-05m_m67_001	CONT	16	5849.65	0.121678
CONT-05m_m67_001.xlsx_RoiSetAuto-56.zip Distance px	CONT-05m_m67_001	CONT	24	5018.07	0.326137
CONT-05m_m67_001.xlsx_RoiSetAuto-57.zip Distance px	CONT-05m_m67_001	CONT	20	5851.66	1.31531
CONT-05m_m67_001.xlsx_RoiSetAuto-6.zip Distance px	CONT-05m_m67_001	CONT	16	5957.33	0.234324
CONT-05m_m67_001.xlsx_RoiSetAuto-60.zip Distance px	CONT-05m_m67_001	CONT	20	6575.56	0.287118
CONT-05m_m67_001.xlsx_RoiSetAuto-61.zip Distance px	CONT-05m_m67_001	CONT	16	5721.72	0.342998
CONT-05m_m67_001.xlsx_RoiSetAuto-62.zip Distance px	CONT-05m_m67_001	CONT	16	5134.16	0.323998
CONT-05m_m67_001.xlsx_RoiSetAuto-63.zip Distance px	CONT-05m_m67_001	CONT	20	5939.34	0.510078
CONT-05m_m67_001.xlsx_RoiSetAuto-64.zip Distance px	CONT-05m_m67_001	CONT	28	5716.46	0.558001
CONT-05m_m67_001.xlsx_RoiSetAuto-65.zip Distance px	CONT-05m_m67_001	CONT	16	6071.72	0.493612
CONT-05m_m67_001.xlsx_RoiSetAuto-66.zip Distance px	CONT-05m_m67_001	CONT	16	6179.92	0.376961
CONT-05m_m67_001.xlsx_RoiSetAuto-67.zip Distance px	CONT-05m_m67_001	CONT	56	7219.46	0.929437
CONT-05m_m67_001.xlsx_RoiSetAuto-68.zip Distance px	CONT-05m_m67_001	CONT	48	7146.72	0.795038
CONT-05m_m67_001.xlsx_RoiSetAuto-69.zip Distance px	CONT-05m_m67_001	CONT	56	8462.58	0.702399
CONT-05m_m67_001.xlsx_RoiSetAuto-7.zip Distance px	CONT-05m_m67_001	CONT	44	7340.37	1.12736
CONT-05m_m67_001.xlsx_RoiSetAuto-70.zip Distance px	CONT-05m_m67_001	CONT	68	8963.21	0.871227
CONT-05m_m67_001.xlsx_RoiSetAuto-71.zip Distance px	CONT-05m_m67_001	CONT	16	4895.9	0.354566
CONT-05m_m67_001.xlsx_RoiSetAuto-72.zip Distance px	CONT-05m_m67_001	CONT	48	11925.2	0.97296
CONT-05m_m67_001.xlsx_RoiSetAuto-73.zip Distance px	CONT-05m_m67_001	CONT	28	5519.38	0.701673
CONT-05m_m67_001.xlsx_RoiSetAuto-75.zip Distance px	CONT-05m_m67_001	CONT	36	6083.85	0.78991
CONT-05m_m67_001.xlsx_RoiSetAuto-76.zip Distance px	CONT-05m_m67_001	CONT	32	6353.17	0.658706
CONT-05m_m67_001.xlsx_RoiSetAuto-78.zip Distance px	CONT-05m_m67_001	CONT	16	5760.6	0.466623
CONT-05m_m67_001.xlsx_RoiSetAuto-79.zip Distance px	CONT-05m_m67_001	CONT	20	6838.44	0.684373
CONT-05m_m67_001.xlsx_RoiSetAuto-9.zip Distance px	CONT-05m_m67_001	CONT	84	6382.06	1.07953
CONT-05m_m67_002.xlsx_RoiSetAuto-12.zip Distance px	CONT-05m_m67_002	CONT	56	5750.28	1.03103
CONT-05m_m67_002.xlsx_RoiSetAuto-13.zip Distance px	CONT-05m_m67_002	CONT	32	5721.1	0.785304
CONT-05m_m67_002.xlsx_RoiSetAuto-16.zip Distance px	CONT-05m_m67_002	CONT	32	7733.79	1.00984
CONT-05m_m67_002.xlsx_RoiSetAuto-17.zip Distance px	CONT-05m_m67_002	CONT	40	5990.65	0.673199
CONT-05m_m67_002.xlsx_RoiSetAuto-18.zip Distance px	CONT-05m_m67_002	CONT	20	4503.18	0.805183
CONT-05m_m67_002.xlsx_RoiSetAuto-19.zip Distance px	CONT-05m_m67_002	CONT	56	7876.92	0.771022
CONT-05m_m67_002.xlsx_RoiSetAuto-2.zip Distance px	CONT-05m_m67_002	CONT	100	9067.01	1.05224
CONT-05m_m67_002.xlsx_RoiSetAuto-22.zip Distance px	CONT-05m_m67_002	CONT	48	10719	0.810415
CONT-05m_m67_002.xlsx_RoiSetAuto-23.zip Distance px	CONT-05m_m67_002	CONT	48	8385.81	0.418907
CONT-05m_m67_002.xlsx_RoiSetAuto-25.zip Distance px	CONT-05m_m67_002	CONT	44	6151.28	0.600063
CONT-05m_m67_002.xlsx_RoiSetAuto-27.zip Distance px	CONT-05m_m67_002	CONT	20	7704.13	0.526938
CONT-05m_m67_002.xlsx_RoiSetAuto-28.zip Distance px	CONT-05m_m67_002	CONT	48	5537.25	0.625919
CONT-05m_m67_002.xlsx_RoiSetAuto-29.zip Distance px	CONT-05m_m67_002	CONT	40	5971.9	0.729687
CONT-05m_m67_002.xlsx_RoiSetAuto-30.zip Distance px	CONT-05m_m67_002	CONT	16	4874.47	0.219887
CONT-05m_m67_002.xlsx_RoiSetAuto-33.zip Distance px	CONT-05m_m67_002	CONT	144	14910.6	2.03204
CONT-05m_m67_002.xlsx_RoiSetAuto-36.zip Distance px	CONT-05m_m67_002	CONT	44	7918.76	0.635231
CONT-05m_m67_002.xlsx_RoiSetAuto-37.zip Distance px	CONT-05m_m67_002	CONT	40	7537.11	0.817238
CONT-05m_m67_002.xlsx_RoiSetAuto-38.zip Distance px	CONT-05m_m67_002	CONT	40	6828.56	0.714748
CONT-05m_m67_002.xlsx_RoiSetAuto-39.zip Distance px	CONT-05m_m67_002	CONT	64	6848.26	0.760601
CONT-05m_m67_002.xlsx_RoiSetAuto-4.zip Distance px	CONT-05m_m67_002	CONT	92	8590.66	0.829114
CONT-05m_m67_002.xlsx_RoiSetAuto-42.zip Distance px	CONT-05m_m67_002	CONT	28	6448.8	0.642553
CONT-05m_m67_002.xlsx_RoiSetAuto-46.zip Distance px	CONT-05m_m67_002	CONT	20	8621.76	0.343878
CONT-05m_m67_002.xlsx_RoiSetAuto-48.zip Distance px	CONT-05m_m67_002	CONT	16	4937.91	0.376127
CONT-05m_m67_002.xlsx_RoiSetAuto-49.zip Distance px	CONT-05m_m67_002	CONT	32	7431.03	0.798568
CONT-05m_m67_002.xlsx_RoiSetAuto-51.zip Distance px	CONT-05m_m67_002	CONT	24	7033.42	0.460317
CONT-05m_m67_002.xlsx_RoiSetAuto-52.zip Distance px	CONT-05m_m67_002	CONT	16	7363.07	0.455748
CONT-05m_m67_002.xlsx_RoiSetAuto-53.zip Distance px	CONT-05m_m67_002	CONT	16	6723.45	0.403391
CONT-05m_m67_002.xlsx_RoiSetAuto-6.zip Distance px	CONT-05m_m67_002	CONT	28	4864.32	0.904455
CONT-05m_m67_002.xlsx_RoiSetAuto-7.zip Distance px	CONT-05m_m67_002	CONT	40	7159.81	0.659764
CONT-05m_m67_002.xlsx_RoiSetAuto-8.zip Distance px	CONT-05m_m67_002	CONT	16	5515.89	0.105134
CONT-06m_m67_002.xlsx_RoiSetAuto-1.zip Distance px	CONT-06m_m67_002	CONT	332	12304.7	1.4524
CONT-06m_m67_002.xlsx_RoiSetAuto-11.zip Distance px	CONT-06m_m67_002	CONT	84	10751.1	0.925258
CONT-06m_m67_002.xlsx_RoiSetAuto-12.zip Distance px	CONT-06m_m67_002	CONT	112	11027.9	1.16171
CONT-06m_m67_002.xlsx_RoiSetAuto-13.zip Distance px	CONT-06m_m67_002	CONT	40	8909.49	0.883259
CONT-06m_m67_002.xlsx_RoiSetAuto-14.zip Distance px	CONT-06m_m67_002	CONT	40	6952.76	0.717741
CONT-06m_m67_002.xlsx_RoiSetAuto-15.zip Distance px	CONT-06m_m67_002	CONT	20	5955.67	0.332015
CONT-06m_m67_002.xlsx_RoiSetAuto-19.zip Distance px	CONT-06m_m67_002	CONT	100	17219.5	0.944674
CONT-06m_m67_002.xlsx_RoiSetAuto-2.zip Distance px	CONT-06m_m67_002	CONT	92	10205	1.46768
CONT-06m_m67_002.xlsx_RoiSetAuto-20.zip Distance px	CONT-06m_m67_002	CONT	16	6366.45	0.281889
CONT-06m_m67_002.xlsx_RoiSetAuto-21.zip Distance px	CONT-06m_m67_002	CONT	64	7196.81	0.722487
CONT-06m_m67_002.xlsx_RoiSetAuto-22.zip Distance px	CONT-06m_m67_002	CONT	36	7829.31	0.657224
CONT-06m_m67_002.xlsx_RoiSetAuto-24.zip Distance px	CONT-06m_m67_002	CONT	32	2411.23	1.43225
CONT-06m_m67_002.xlsx_RoiSetAuto-28.zip Distance px	CONT-06m_m67_002	CONT	36	2658.15	1.80022
CONT-06m_m67_002.xlsx_RoiSetAuto-29.zip Distance px	CONT-06m_m67_002	CONT	20	6808.65	0.437006
CONT-06m_m67_002.xlsx_RoiSetAuto-3.zip Distance px	CONT-06m_m67_002	CONT	92	9293.24	0.868656
CONT-06m_m67_002.xlsx_RoiSetAuto-30.zip Distance px	CONT-06m_m67_002	CONT	16	6658.23	0.477638
CONT-06m_m67_002.xlsx_RoiSetAuto-4.zip Distance px	CONT-06m_m67_002	CONT	20	7398.47	0.342491
CONT-06m_m67_002.xlsx_RoiSetAuto-5.zip Distance px	CONT-06m_m67_002	CONT	120	14390.1	1.134
CONT-06m_m67_002.xlsx_RoiSetAuto-6.zip Distance px	CONT-06m_m67_002	CONT	32	5621.67	0.555326
CONT-06m_m67_002.xlsx_RoiSetAuto-7.zip Distance px	CONT-06m_m67_002	CONT	28	6176.62	0.643004
CONT-06m_m67_002.xlsx_RoiSetAuto-9.zip Distance px	CONT-06m_m67_002	CONT	20	6479.11	0.444533
CONT-06m_m67_003.xlsx_RoiSetAuto-1.zip Distance px	CONT-06m_m67_003	CONT	56	8994.29	0.698913
CONT-06m_m67_003.xlsx_RoiSetAuto-10.zip Distance px	CONT-06m_m67_003	CONT	120	10376	1.15312
CONT-06m_m67_003.xlsx_RoiSetAuto-11.zip Distance px	CONT-06m_m67_003	CONT	52	10590.8	0.486253
CONT-06m_m67_003.xlsx_RoiSetAuto-12.zip Distance px	CONT-06m_m67_003	CONT	16	9488.27	0.278311
CONT-06m_m67_003.xlsx_RoiSetAuto-14.zip Distance px	CONT-06m_m67_003	CONT	80	10749.4	0.826033
CONT-06m_m67_003.xlsx_RoiSetAuto-15.zip Distance px	CONT-06m_m67_003	CONT	64	11676.7	0.969631
CONT-06m_m67_003.xlsx_RoiSetAuto-16.zip Distance px	CONT-06m_m67_003	CONT	24	8526.35	0.236111
CONT-06m_m67_003.xlsx_RoiSetAuto-17.zip Distance px	CONT-06m_m67_003	CONT	16	9236.32	0.302812
CONT-06m_m67_003.xlsx_RoiSetAuto-18.zip Distance px	CONT-06m_m67_003	CONT	28	10094.1	0.401476
CONT-06m_m67_003.xlsx_RoiSetAuto-19.zip Distance px	CONT-06m_m67_003	CONT	16	7807.07	0.337232
CONT-06m_m67_003.xlsx_RoiSetAuto-3.zip Distance px	CONT-06m_m67_003	CONT	60	7173.75	0.585136
CONT-06m_m67_003.xlsx_RoiSetAuto-4.zip Distance px	CONT-06m_m67_003	CONT	60	7040.97	0.834543
CONT-06m_m67_003.xlsx_RoiSetAuto-5.zip Distance px	CONT-06m_m67_003	CONT	24	6548.86	0.770729
CONT-06m_m67_003.xlsx_RoiSetAuto-7.zip Distance px	CONT-06m_m67_003	CONT	32	7138.42	0.515917
CONT-06m_m67_003.xlsx_RoiSetAuto-8.zip Distance px	CONT-06m_m67_003	CONT	100	7487.01	0.722522
CONT-06m_m67_003.xlsx_RoiSetAuto-9.zip Distance px	CONT-06m_m67_003	CONT	184	9620.02	0.852948
WASp-01m_m67_001.xlsx_RoiSetAuto-1.zip Distance px	WASp-01m_m67_001	WASp	36	8259.12	0.66058
WASp-01m_m67_001.xlsx_RoiSetAuto-3.zip Distance px	WASp-01m_m67_001	WASp	16	7456.01	0.272527
WASp-01m_m67_001.xlsx_RoiSetAuto-4.zip Distance px	WASp-01m_m67_001	WASp	16	7889.79	0.382572
WASp-01m_m67_002.xlsx_RoiSetAuto-1.zip Distance px	WASp-01m_m67_002	WASp	356	9885.16	0.990363
WASp-01m_m67_002.xlsx_RoiSetAuto-2.zip Distance px	WASp-01m_m67_002	WASp	36	7409.57	0.457564
WASp-01m_m67_002.xlsx_RoiSetAuto-3.zip Distance px	WASp-01m_m67_002	WASp	24	6915.39	0.633771
WASp-01m_m67_003.xlsx_RoiSetAuto-1.zip Distance px	WASp-01m_m67_003	WASp	76	19584	0.969546
WASp-01m_m67_003.xlsx_RoiSetAuto-10.zip Distance px	WASp-01m_m67_003	WASp	32	9373.61	0.80164
WASp-01m_m67_003.xlsx_RoiSetAuto-12.zip Distance px	WASp-01m_m67_003	WASp	20	6890.6	0.240298
WASp-01m_m67_003.xlsx_RoiSetAuto-13.zip Distance px	WASp-01m_m67_003	WASp	128	13720.7	0.883781
WASp-01m_m67_003.xlsx_RoiSetAuto-14.zip Distance px	WASp-01m_m67_003	WASp	28	7837.37	0.22089
WASp-01m_m67_003.xlsx_RoiSetAuto-17.zip Distance px	WASp-01m_m67_003	WASp	52	11319.6	0.706979
WASp-01m_m67_003.xlsx_RoiSetAuto-18.zip Distance px	WASp-01m_m67_003	WASp	28	9513.04	0.590292
WASp-01m_m67_003.xlsx_RoiSetAuto-21.zip Distance px	WASp-01m_m67_003	WASp	32	8887.7	0.516514
WASp-01m_m67_003.xlsx_RoiSetAuto-22.zip Distance px	WASp-01m_m67_003	WASp	28	9900.18	0.513183
WASp-01m_m67_003.xlsx_RoiSetAuto-4.zip Distance px	WASp-01m_m67_003	WASp	28	7499.65	0.570808
WASp-01m_m67_003.xlsx_RoiSetAuto-7.zip Distance px	WASp-01m_m67_003	WASp	64	8622.39	0.681927
WASp-01m_m67_003.xlsx_RoiSetAuto-8.zip Distance px	WASp-01m_m67_003	WASp	52	8016.9	0.448986
WASp-01m_m67_003.xlsx_RoiSetAuto-9.zip Distance px	WASp-01m_m67_003	WASp	32	9295.78	0.492093
WASp-02m_m67_001.xlsx_RoiSetAuto-10.zip Distance px	WASp-02m_m67_001	WASp	16	8679.61	0.498661
WASp-02m_m67_001.xlsx_RoiSetAuto-11.zip Distance px	WASp-02m_m67_001	WASp	36	9205.19	0.583056
WASp-02m_m67_001.xlsx_RoiSetAuto-12.zip Distance px	WASp-02m_m67_001	WASp	20	14834.9	0.454021
WASp-02m_m67_001.xlsx_RoiSetAuto-13.zip Distance px	WASp-02m_m67_001	WASp	28	12531.5	0.297016
WASp-02m_m67_001.xlsx_RoiSetAuto-14.zip Distance px	WASp-02m_m67_001	WASp	64	14179.6	0.414529
WASp-02m_m67_001.xlsx_RoiSetAuto-15.zip Distance px	WASp-02m_m67_001	WASp	20	10850.2	0.183423
WASp-02m_m67_001.xlsx_RoiSetAuto-16.zip Distance px	WASp-02m_m67_001	WASp	56	13401.8	0.589844
WASp-02m_m67_001.xlsx_RoiSetAuto-17.zip Distance px	WASp-02m_m67_001	WASp	24	13778	0.349199
WASp-02m_m67_001.xlsx_RoiSetAuto-18.zip Distance px	WASp-02m_m67_001	WASp	16	17730.5	0.294043
WASp-02m_m67_001.xlsx_RoiSetAuto-19.zip Distance px	WASp-02m_m67_001	WASp	20	15930	0.346319
WASp-02m_m67_001.xlsx_RoiSetAuto-2.zip Distance px	WASp-02m_m67_001	WASp	140	15952.9	0.974639
WASp-02m_m67_001.xlsx_RoiSetAuto-20.zip Distance px	WASp-02m_m67_001	WASp	28	12586.2	0.334403
WASp-02m_m67_001.xlsx_RoiSetAuto-21.zip Distance px	WASp-02m_m67_001	WASp	16	14737.3	0.223532
WASp-02m_m67_001.xlsx_RoiSetAuto-3.zip Distance px	WASp-02m_m67_001	WASp	36	9329.62	0.448271
WASp-02m_m67_001.xlsx_RoiSetAuto-5.zip Distance px	WASp-02m_m67_001	WASp	100	9935.1	0.713432
WASp-02m_m67_001.xlsx_RoiSetAuto-6.zip Distance px	WASp-02m_m67_001	WASp	28	8684.12	0.347719
WASp-02m_m67_001.xlsx_RoiSetAuto-7.zip Distance px	WASp-02m_m67_001	WASp	20	10098.5	0.419511
WASp-02m_m67_001.xlsx_RoiSetAuto-8.zip Distance px	WASp-02m_m67_001	WASp	64	10857.7	0.62533
WASp-02m_m67_002.xlsx_RoiSetAuto-1.zip Distance px	WASp-02m_m67_002	WASp	64	13177.3	0.83425
WASp-02m_m67_002.xlsx_RoiSetAuto-11.zip Distance px	WASp-02m_m67_002	WASp	20	12936.6	0.511998
WASp-02m_m67_002.xlsx_RoiSetAuto-12.zip Distance px	WASp-02m_m67_002	WASp	28	17464.7	0.334295
WASp-02m_m67_002.xlsx_RoiSetAuto-13.zip Distance px	WASp-02m_m67_002	WASp	16	12584.6	0.227897
WASp-02m_m67_002.xlsx_RoiSetAuto-14.zip Distance px	WASp-02m_m67_002	WASp	20	13994.7	0.233006
WASp-02m_m67_002.xlsx_RoiSetAuto-15.zip Distance px	WASp-02m_m67_002	WASp	28	14099.2	0.485831
WASp-02m_m67_002.xlsx_RoiSetAuto-2.zip Distance px	WASp-02m_m67_002	WASp	24	11292.6	0.45752
WASp-02m_m67_002.xlsx_RoiSetAuto-3.zip Distance px	WASp-02m_m67_002	WASp	52	11420.6	0.732697
WASp-02m_m67_002.xlsx_RoiSetAuto-4.zip Distance px	WASp-02m_m67_002	WASp	64	12986.4	0.753472
WASp-02m_m67_002.xlsx_RoiSetAuto-5.zip Distance px	WASp-02m_m67_002	WASp	16	11622.7	0.339578
WASp-02m_m67_002.xlsx_RoiSetAuto-7.zip Distance px	WASp-02m_m67_002	WASp	44	11249.4	0.407347
WASp-02m_m67_003.xlsx_RoiSetAuto-1.zip Distance px	WASp-02m_m67_003	WASp	44	18589.4	0.346146
WASp-02m_m67_003.xlsx_RoiSetAuto-10.zip Distance px	WASp-02m_m67_003	WASp	20	16803.3	0.129608
WASp-02m_m67_003.xlsx_RoiSetAuto-3.zip Distance px	WASp-02m_m67_003	WASp	20	17378.9	0.602503
WASp-02m_m67_003.xlsx_RoiSetAuto-6.zip Distance px	WASp-02m_m67_003	WASp	16	17308.4	0.214996
WASp-02m_m67_003.xlsx_RoiSetAuto-7.zip Distance px	WASp-02m_m67_003	WASp	28	15892.4	0.370637
WASp-02m_m67_003.xlsx_RoiSetAuto-8.zip Distance px	WASp-02m_m67_003	WASp	28	18149.1	0.489162
WASp-02m_m67_003.xlsx_RoiSetAuto-9.zip Distance px	WASp-02m_m67_003	WASp	16	18037.9	0.205531
WASP-03f_m67_001.xlsx_RoiSetAuto-10.zip Distance px	WASP-03f_m67_001	WASP	20	11078.7	0.267917
WASP-03f_m67_001.xlsx_RoiSetAuto-12.zip Distance px	WASP-03f_m67_001	WASP	72	13994.2	0.742998
WASP-03f_m67_001.xlsx_RoiSetAuto-14.zip Distance px	WASP-03f_m67_001	WASP	20	12585	0.373915
WASP-03f_m67_001.xlsx_RoiSetAuto-15.zip Distance px	WASP-03f_m67_001	WASP	136	19897.9	0.627683
WASP-03f_m67_001.xlsx_RoiSetAuto-16.zip Distance px	WASP-03f_m67_001	WASP	20	12229.6	0.390201
WASP-03f_m67_001.xlsx_RoiSetAuto-2.zip Distance px	WASP-03f_m67_001	WASP	260	25698	0.983763
WASP-03f_m67_001.xlsx_RoiSetAuto-27.zip Distance px	WASP-03f_m67_001	WASP	64	11915.7	0.547675
WASP-03f_m67_001.xlsx_RoiSetAuto-28.zip Distance px	WASP-03f_m67_001	WASP	16	15143.7	0.370319
WASP-03f_m67_001.xlsx_RoiSetAuto-29.zip Distance px	WASP-03f_m67_001	WASP	32	17957.2	0.220324
WASP-03f_m67_001.xlsx_RoiSetAuto-3.zip Distance px	WASP-03f_m67_001	WASP	156	15361.2	0.870877
WASP-03f_m67_001.xlsx_RoiSetAuto-30.zip Distance px	WASP-03f_m67_001	WASP	84	20171.2	1.10111
WASP-03f_m67_001.xlsx_RoiSetAuto-31.zip Distance px	WASP-03f_m67_001	WASP	72	15711	0.355398
WASP-03f_m67_001.xlsx_RoiSetAuto-32.zip Distance px	WASP-03f_m67_001	WASP	56	14085.2	0.450891
WASP-03f_m67_001.xlsx_RoiSetAuto-33.zip Distance px	WASP-03f_m67_001	WASP	60	27817.8	0.722276
WASP-03f_m67_001.xlsx_RoiSetAuto-35.zip Distance px	WASP-03f_m67_001	WASP	20	14821.5	0.377665
WASP-03f_m67_001.xlsx_RoiSetAuto-36.zip Distance px	WASP-03f_m67_001	WASP	24	15187.9	0.729014
WASP-03f_m67_001.xlsx_RoiSetAuto-37.zip Distance px	WASP-03f_m67_001	WASP	16	14031.2	0.422316
WASP-03f_m67_001.xlsx_RoiSetAuto-4.zip Distance px	WASP-03f_m67_001	WASP	240	24071.1	1.38181
WASP-03f_m67_001.xlsx_RoiSetAuto-6.zip Distance px	WASP-03f_m67_001	WASP	224	19950	1.42985
WASP-03f_m67_001.xlsx_RoiSetAuto-7.zip Distance px	WASP-03f_m67_001	WASP	40	14256.4	0.774337
WASP-03f_m67_002.xlsx_RoiSetAuto-1.zip Distance px	WASP-03f_m67_002	WASP	356	20636.1	1.11421
WASP-03f_m67_002.xlsx_RoiSetAuto-10.zip Distance px	WASP-03f_m67_002	WASP	48	13216.9	0.565742
WASP-03f_m67_002.xlsx_RoiSetAuto-12.zip Distance px	WASP-03f_m67_002	WASP	44	16677.5	0.714781
WASP-03f_m67_002.xlsx_RoiSetAuto-13.zip Distance px	WASP-03f_m67_002	WASP	28	13727.2	0.503199
WASP-03f_m67_002.xlsx_RoiSetAuto-14.zip Distance px	WASP-03f_m67_002	WASP	16	10876.4	0.323321
WASP-03f_m67_002.xlsx_RoiSetAuto-15.zip Distance px	WASP-03f_m67_002	WASP	24	12404.2	0.382472
WASP-03f_m67_002.xlsx_RoiSetAuto-16.zip Distance px	WASP-03f_m67_002	WASP	104	20986.7	1.11347
WASP-03f_m67_002.xlsx_RoiSetAuto-17.zip Distance px	WASP-03f_m67_002	WASP	28	12498	0.457122
WASP-03f_m67_002.xlsx_RoiSetAuto-18.zip Distance px	WASP-03f_m67_002	WASP	16	14645.6	0.196572
WASP-03f_m67_002.xlsx_RoiSetAuto-19.zip Distance px	WASP-03f_m67_002	WASP	40	11965.8	0.419613
WASP-03f_m67_002.xlsx_RoiSetAuto-2.zip Distance px	WASP-03f_m67_002	WASP	68	17404.3	0.803606
WASP-03f_m67_002.xlsx_RoiSetAuto-20.zip Distance px	WASP-03f_m67_002	WASP	16	11162.3	0.162537
WASP-03f_m67_002.xlsx_RoiSetAuto-21.zip Distance px	WASP-03f_m67_002	WASP	204	23715.9	0.851007
WASP-03f_m67_002.xlsx_RoiSetAuto-22.zip Distance px	WASP-03f_m67_002	WASP	20	12007.7	0.573167
WASP-03f_m67_002.xlsx_RoiSetAuto-23.zip Distance px	WASP-03f_m67_002	WASP	24	14655.4	0.569257
WASP-03f_m67_002.xlsx_RoiSetAuto-24.zip Distance px	WASP-03f_m67_002	WASP	84	26038.1	1.40164
WASP-03f_m67_002.xlsx_RoiSetAuto-25.zip Distance px	WASP-03f_m67_002	WASP	28	12558	0.320181
WASP-03f_m67_002.xlsx_RoiSetAuto-26.zip Distance px	WASP-03f_m67_002	WASP	32	13753	0.438701
WASP-03f_m67_002.xlsx_RoiSetAuto-27.zip Distance px	WASP-03f_m67_002	WASP	24	13908.7	0.337193
WASP-03f_m67_002.xlsx_RoiSetAuto-28.zip Distance px	WASP-03f_m67_002	WASP	88	18745.6	0.687946
WASP-03f_m67_002.xlsx_RoiSetAuto-29.zip Distance px	WASP-03f_m67_002	WASP	24	10343	0.43848
WASP-03f_m67_002.xlsx_RoiSetAuto-3.zip Distance px	WASP-03f_m67_002	WASP	40	13783.3	0.457128
WASP-03f_m67_002.xlsx_RoiSetAuto-30.zip Distance px	WASP-03f_m67_002	WASP	100	23457.8	0.916301
WASP-03f_m67_002.xlsx_RoiSetAuto-31.zip Distance px	WASP-03f_m67_002	WASP	68	14610	0.553726
WASP-03f_m67_002.xlsx_RoiSetAuto-32.zip Distance px	WASP-03f_m67_002	WASP	56	16379.7	0.518088
WASP-03f_m67_002.xlsx_RoiSetAuto-33.zip Distance px	WASP-03f_m67_002	WASP	48	14599.9	0.545112
WASP-03f_m67_002.xlsx_RoiSetAuto-34.zip Distance px	WASP-03f_m67_002	WASP	48	14987.7	0.75054
WASP-03f_m67_002.xlsx_RoiSetAuto-35.zip Distance px	WASP-03f_m67_002	WASP	60	24033	0.993657
WASP-03f_m67_002.xlsx_RoiSetAuto-36.zip Distance px	WASP-03f_m67_002	WASP	16	13867.3	0.161783
WASP-03f_m67_002.xlsx_RoiSetAuto-37.zip Distance px	WASP-03f_m67_002	WASP	24	14979.5	0.186178
WASP-03f_m67_002.xlsx_RoiSetAuto-38.zip Distance px	WASP-03f_m67_002	WASP	24	13512.5	0.306809
WASP-03f_m67_002.xlsx_RoiSetAuto-39.zip Distance px	WASP-03f_m67_002	WASP	56	15066.4	0.529951
WASP-03f_m67_002.xlsx_RoiSetAuto-4.zip Distance px	WASP-03f_m67_002	WASP	16	14106.7	0.303856
WASP-03f_m67_002.xlsx_RoiSetAuto-40.zip Distance px	WASP-03f_m67_002	WASP	104	24079.8	1.03284
WASP-03f_m67_002.xlsx_RoiSetAuto-41.zip Distance px	WASP-03f_m67_002	WASP	24	14110.7	0.202185
WASP-03f_m67_002.xlsx_RoiSetAuto-42.zip Distance px	WASP-03f_m67_002	WASP	100	18643.5	0.638454
WASP-03f_m67_002.xlsx_RoiSetAuto-43.zip Distance px	WASP-03f_m67_002	WASP	84	18518.7	0.714497
WASP-03f_m67_002.xlsx_RoiSetAuto-44.zip Distance px	WASP-03f_m67_002	WASP	24	15703.3	0.291408
WASP-03f_m67_002.xlsx_RoiSetAuto-45.zip Distance px	WASP-03f_m67_002	WASP	52	22148.8	0.737685
WASP-03f_m67_002.xlsx_RoiSetAuto-46.zip Distance px	WASP-03f_m67_002	WASP	16	15618	0.359686
WASP-03f_m67_002.xlsx_RoiSetAuto-47.zip Distance px	WASP-03f_m67_002	WASP	28	17688.2	0.554075
WASP-03f_m67_002.xlsx_RoiSetAuto-5.zip Distance px	WASP-03f_m67_002	WASP	64	19121.8	0.489584
WASP-03f_m67_002.xlsx_RoiSetAuto-6.zip Distance px	WASP-03f_m67_002	WASP	252	20162.6	1.11708
WASP-03f_m67_002.xlsx_RoiSetAuto-7.zip Distance px	WASP-03f_m67_002	WASP	160	22786.5	0.940762
WASP-03f_m67_002.xlsx_RoiSetAuto-8.zip Distance px	WASP-03f_m67_002	WASP	344	26682.5	1.04832
WASP-03f_m67_002.xlsx_RoiSetAuto-9.zip Distance px	WASP-03f_m67_002	WASP	32	13089.4	0.535598
WASP-04m_m67_001.xlsx_RoiSetAuto-1.zip Distance px	WASP-04m_m67_001	WASP	132	22598.2	1.03932
WASP-04m_m67_001.xlsx_RoiSetAuto-10.zip Distance px	WASP-04m_m67_001	WASP	16	9793.18	0.518638
WASP-04m_m67_001.xlsx_RoiSetAuto-11.zip Distance px	WASP-04m_m67_001	WASP	68	14706	1.18182
WASP-04m_m67_001.xlsx_RoiSetAuto-12.zip Distance px	WASP-04m_m67_001	WASP	32	16456.9	0.95174
WASP-04m_m67_001.xlsx_RoiSetAuto-13.zip Distance px	WASP-04m_m67_001	WASP	88	14112.4	0.736428
WASP-04m_m67_001.xlsx_RoiSetAuto-14.zip Distance px	WASP-04m_m67_001	WASP	16	10649.1	0.0504335
WASP-04m_m67_001.xlsx_RoiSetAuto-15.zip Distance px	WASP-04m_m67_001	WASP	16	11656.6	0.352623
WASP-04m_m67_001.xlsx_RoiSetAuto-16.zip Distance px	WASP-04m_m67_001	WASP	44	10485.8	0.499434
WASP-04m_m67_001.xlsx_RoiSetAuto-17.zip Distance px	WASP-04m_m67_001	WASP	36	10640.5	0.616009
WASP-04m_m67_001.xlsx_RoiSetAuto-23.zip Distance px	WASP-04m_m67_001	WASP	20	8954.63	0.515628
WASP-04m_m67_001.xlsx_RoiSetAuto-24.zip Distance px	WASP-04m_m67_001	WASP	108	13178.1	0.809845
WASP-04m_m67_001.xlsx_RoiSetAuto-25.zip Distance px	WASP-04m_m67_001	WASP	20	10692.3	0.406994
WASP-04m_m67_001.xlsx_RoiSetAuto-26.zip Distance px	WASP-04m_m67_001	WASP	44	11528.1	1.00181
WASP-04m_m67_001.xlsx_RoiSetAuto-27.zip Distance px	WASP-04m_m67_001	WASP	96	15259.3	0.91331
WASP-04m_m67_001.xlsx_RoiSetAuto-28.zip Distance px	WASP-04m_m67_001	WASP	68	14168.7	0.749557
WASP-04m_m67_001.xlsx_RoiSetAuto-3.zip Distance px	WASP-04m_m67_001	WASP	36	11371.5	0.752249
WASP-04m_m67_001.xlsx_RoiSetAuto-31.zip Distance px	WASP-04m_m67_001	WASP	20	10105.3	0.719312
WASP-04m_m67_001.xlsx_RoiSetAuto-32.zip Distance px	WASP-04m_m67_001	WASP	16	10367.7	0.073658
WASP-04m_m67_001.xlsx_RoiSetAuto-34.zip Distance px	WASP-04m_m67_001	WASP	16	10924.7	0.294644
WASP-04m_m67_001.xlsx_RoiSetAuto-35.zip Distance px	WASP-04m_m67_001	WASP	16	11064.1	0.540708
WASP-04m_m67_001.xlsx_RoiSetAuto-37.zip Distance px	WASP-04m_m67_001	WASP	16	12496.8	0.226251
WASP-04m_m67_001.xlsx_RoiSetAuto-5.zip Distance px	WASP-04m_m67_001	WASP	20	9349.15	0.31247
WASP-04m_m67_001.xlsx_RoiSetAuto-6.zip Distance px	WASP-04m_m67_001	WASP	80	17637.6	0.930097
WASP-04m_m67_001.xlsx_RoiSetAuto-7.zip Distance px	WASP-04m_m67_001	WASP	24	8912.24	0.318111
WASP-04m_m67_001.xlsx_RoiSetAuto-8.zip Distance px	WASP-04m_m67_001	WASP	32	8763.72	0.214164
WASP-04m_m67_002.xlsx_RoiSetAuto-1.zip Distance px	WASP-04m_m67_002	WASP	68	16457.3	0.525825
WASP-04m_m67_002.xlsx_RoiSetAuto-10.zip Distance px	WASP-04m_m67_002	WASP	36	14337.1	0.603525
WASP-04m_m67_002.xlsx_RoiSetAuto-11.zip Distance px	WASP-04m_m67_002	WASP	20	13333.9	0.286906
WASP-04m_m67_002.xlsx_RoiSetAuto-12.zip Distance px	WASP-04m_m67_002	WASP	16	12521.5	0.254721
WASP-04m_m67_002.xlsx_RoiSetAuto-13.zip Distance px	WASP-04m_m67_002	WASP	84	18991.9	0.914923
WASP-04m_m67_002.xlsx_RoiSetAuto-14.zip Distance px	WASP-04m_m67_002	WASP	84	24768	0.964658
WASP-04m_m67_002.xlsx_RoiSetAuto-15.zip Distance px	WASP-04m_m67_002	WASP	56	13277.7	0.517579
WASP-04m_m67_002.xlsx_RoiSetAuto-16.zip Distance px	WASP-04m_m67_002	WASP	24	14387.4	0.326946
WASP-04m_m67_002.xlsx_RoiSetAuto-17.zip Distance px	WASP-04m_m67_002	WASP	56	16583.2	0.450193
WASP-04m_m67_002.xlsx_RoiSetAuto-18.zip Distance px	WASP-04m_m67_002	WASP	24	13017.2	0.370946
WASP-04m_m67_002.xlsx_RoiSetAuto-19.zip Distance px	WASP-04m_m67_002	WASP	192	20409.9	0.782326
WASP-04m_m67_002.xlsx_RoiSetAuto-2.zip Distance px	WASP-04m_m67_002	WASP	52	13048.8	0.588509
WASP-04m_m67_002.xlsx_RoiSetAuto-20.zip Distance px	WASP-04m_m67_002	WASP	112	25285.3	0.640411
WASP-04m_m67_002.xlsx_RoiSetAuto-21.zip Distance px	WASP-04m_m67_002	WASP	176	20023.3	1.24253
WASP-04m_m67_002.xlsx_RoiSetAuto-22.zip Distance px	WASP-04m_m67_002	WASP	28	14502.3	0.53867
WASP-04m_m67_002.xlsx_RoiSetAuto-23.zip Distance px	WASP-04m_m67_002	WASP	108	15569.1	0.781725
WASP-04m_m67_002.xlsx_RoiSetAuto-24.zip Distance px	WASP-04m_m67_002	WASP	44	13872.6	0.410356
WASP-04m_m67_002.xlsx_RoiSetAuto-25.zip Distance px	WASP-04m_m67_002	WASP	36	19410.2	0.609004
WASP-04m_m67_002.xlsx_RoiSetAuto-26.zip Distance px	WASP-04m_m67_002	WASP	28	15545.8	0.318418
WASP-04m_m67_002.xlsx_RoiSetAuto-27.zip Distance px	WASP-04m_m67_002	WASP	68	15826	0.742582
WASP-04m_m67_002.xlsx_RoiSetAuto-28.zip Distance px	WASP-04m_m67_002	WASP	80	15915.3	0.685372
WASP-04m_m67_002.xlsx_RoiSetAuto-29.zip Distance px	WASP-04m_m67_002	WASP	32	15054.5	0.490072
WASP-04m_m67_002.xlsx_RoiSetAuto-3.zip Distance px	WASP-04m_m67_002	WASP	344	28609.8	1.38205
WASP-04m_m67_002.xlsx_RoiSetAuto-30.zip Distance px	WASP-04m_m67_002	WASP	16	13635.6	0.0318931
WASP-04m_m67_002.xlsx_RoiSetAuto-31.zip Distance px	WASP-04m_m67_002	WASP	32	15785.7	0.678913
WASP-04m_m67_002.xlsx_RoiSetAuto-4.zip Distance px	WASP-04m_m67_002	WASP	108	28208.2	1.1733
WASP-04m_m67_002.xlsx_RoiSetAuto-5.zip Distance px	WASP-04m_m67_002	WASP	28	14465.6	0.334631
WASP-04m_m67_002.xlsx_RoiSetAuto-6.zip Distance px	WASP-04m_m67_002	WASP	112	21392.9	1.0872
WASP-04m_m67_002.xlsx_RoiSetAuto-7.zip Distance px	WASP-04m_m67_002	WASP	28	16014.3	0.465732
WASP-04m_m67_002.xlsx_RoiSetAuto-8.zip Distance px	WASP-04m_m67_002	WASP	36	13830.3	0.376112
WASP-04m_m67_002.xlsx_RoiSetAuto-9.zip Distance px	WASP-04m_m67_002	WASP	72	14511.8	0.7776
WASP-04m_m67_003.xlsx_RoiSetAuto-1.zip Distance px	WASP-04m_m67_003	WASP	40	20903.6	0.699158
WASP-04m_m67_003.xlsx_RoiSetAuto-10.zip Distance px	WASP-04m_m67_003	WASP	16	14448.2	0.304642
WASP-04m_m67_003.xlsx_RoiSetAuto-11.zip Distance px	WASP-04m_m67_003	WASP	16	14357.9	0.442745
WASP-04m_m67_003.xlsx_RoiSetAuto-12.zip Distance px	WASP-04m_m67_003	WASP	56	15542.3	0.631595
WASP-04m_m67_003.xlsx_RoiSetAuto-14.zip Distance px	WASP-04m_m67_003	WASP	20	14639.8	0.431771
WASP-04m_m67_003.xlsx_RoiSetAuto-15.zip Distance px	WASP-04m_m67_003	WASP	56	14793.3	0.309625
WASP-04m_m67_003.xlsx_RoiSetAuto-16.zip Distance px	WASP-04m_m67_003	WASP	16	12879	0.158074
WASP-04m_m67_003.xlsx_RoiSetAuto-17.zip Distance px	WASP-04m_m67_003	WASP	16	14556.4	0.20669
WASP-04m_m67_003.xlsx_RoiSetAuto-18.zip Distance px	WASP-04m_m67_003	WASP	32	17533.5	0.268752
WASP-04m_m67_003.xlsx_RoiSetAuto-19.zip Distance px	WASP-04m_m67_003	WASP	20	13623.2	0.448537
WASP-04m_m67_003.xlsx_RoiSetAuto-2.zip Distance px	WASP-04m_m67_003	WASP	40	17122.3	0.64966
WASP-04m_m67_003.xlsx_RoiSetAuto-20.zip Distance px	WASP-04m_m67_003	WASP	68	23805.2	1.21403
WASP-04m_m67_003.xlsx_RoiSetAuto-21.zip Distance px	WASP-04m_m67_003	WASP	24	16120	0.332334
WASP-04m_m67_003.xlsx_RoiSetAuto-22.zip Distance px	WASP-04m_m67_003	WASP	16	14660.7	0.193412
WASP-04m_m67_003.xlsx_RoiSetAuto-23.zip Distance px	WASP-04m_m67_003	WASP	104	26321.1	1.13463
WASP-04m_m67_003.xlsx_RoiSetAuto-24.zip Distance px	WASP-04m_m67_003	WASP	56	16913.7	0.684879
WASP-04m_m67_003.xlsx_RoiSetAuto-25.zip Distance px	WASP-04m_m67_003	WASP	20	17599.7	0.222647
WASP-04m_m67_003.xlsx_RoiSetAuto-26.zip Distance px	WASP-04m_m67_003	WASP	44	19304.2	0.516839
WASP-04m_m67_003.xlsx_RoiSetAuto-27.zip Distance px	WASP-04m_m67_003	WASP	16	15627.4	0.138076
WASP-04m_m67_003.xlsx_RoiSetAuto-28.zip Distance px	WASP-04m_m67_003	WASP	16	16623.4	0.398156
WASP-04m_m67_003.xlsx_RoiSetAuto-3.zip Distance px	WASP-04m_m67_003	WASP	20	12521.1	0.413761
WASP-04m_m67_003.xlsx_RoiSetAuto-4.zip Distance px	WASP-04m_m67_003	WASP	16	13424.6	0.229094
WASP-04m_m67_003.xlsx_RoiSetAuto-5.zip Distance px	WASP-04m_m67_003	WASP	72	15309.1	0.466495
WASP-04m_m67_003.xlsx_RoiSetAuto-6.zip Distance px	WASP-04m_m67_003	WASP	68	19517.4	1.17097
WASP-04m_m67_003.xlsx_RoiSetAuto-7.zip Distance px	WASP-04m_m67_003	WASP	76	17282	0.816093
WASP-04m_m67_003.xlsx_RoiSetAuto-8.zip Distance px	WASP-04m_m67_003	WASP	88	15826.5	0.670308
WASP-04m_m67_003.xlsx_RoiSetAuto-9.zip Distance px	WASP-04m_m67_003	WASP	324	23362.5	1.42866
WASP-05m_m67_001.xlsx_RoiSetAuto-1.zip Distance px	WASP-05m_m67_001	WASP	28	5293.36	0.143724
WASP-05m_m67_001.xlsx_RoiSetAuto-10.zip Distance px	WASP-05m_m67_001	WASP	104	6908.47	0.684771
WASP-05m_m67_001.xlsx_RoiSetAuto-11.zip Distance px	WASP-05m_m67_001	WASP	28	4945.78	0.482263
WASP-05m_m67_001.xlsx_RoiSetAuto-12.zip Distance px	WASP-05m_m67_001	WASP	172	11069.7	0.626285
WASP-05m_m67_001.xlsx_RoiSetAuto-13.zip Distance px	WASP-05m_m67_001	WASP	16	5105.79	0.176423
WASP-05m_m67_001.xlsx_RoiSetAuto-15.zip Distance px	WASP-05m_m67_001	WASP	164	9783.21	1.39618
WASP-05m_m67_001.xlsx_RoiSetAuto-17.zip Distance px	WASP-05m_m67_001	WASP	24	5330.13	0.565458
WASP-05m_m67_001.xlsx_RoiSetAuto-2.zip Distance px	WASP-05m_m67_001	WASP	24	5100.43	0.324791
WASP-05m_m67_001.xlsx_RoiSetAuto-20.zip Distance px	WASP-05m_m67_001	WASP	56	5342.71	1.0373
WASP-05m_m67_001.xlsx_RoiSetAuto-23.zip Distance px	WASP-05m_m67_001	WASP	16	5253.99	0.302045
WASP-05m_m67_001.xlsx_RoiSetAuto-26.zip Distance px	WASP-05m_m67_001	WASP	32	5619.64	0.583273
WASP-05m_m67_001.xlsx_RoiSetAuto-27.zip Distance px	WASP-05m_m67_001	WASP	52	6049.57	0.690119
WASP-05m_m67_001.xlsx_RoiSetAuto-28.zip Distance px	WASP-05m_m67_001	WASP	36	5512.19	0.757804
WASP-05m_m67_001.xlsx_RoiSetAuto-3.zip Distance px	WASP-05m_m67_001	WASP	332	7289.56	1.16501
WASP-05m_m67_001.xlsx_RoiSetAuto-30.zip Distance px	WASP-05m_m67_001	WASP	28	5594.86	0.56769
WASP-05m_m67_001.xlsx_RoiSetAuto-31.zip Distance px	WASP-05m_m67_001	WASP	16	4973.73	0.441577
WASP-05m_m67_001.xlsx_RoiSetAuto-32.zip Distance px	WASP-05m_m67_001	WASP	44	5916.8	0.640709
WASP-05m_m67_001.xlsx_RoiSetAuto-33.zip Distance px	WASP-05m_m67_001	WASP	16	3745.63	0.277434
WASP-05m_m67_001.xlsx_RoiSetAuto-34.zip Distance px	WASP-05m_m67_001	WASP	20	5286.98	0.382739
WASP-05m_m67_001.xlsx_RoiSetAuto-35.zip Distance px	WASP-05m_m67_001	WASP	16	5071.68	0.198161
WASP-05m_m67_001.xlsx_RoiSetAuto-5.zip Distance px	WASP-05m_m67_001	WASP	88	14716.8	0.623595
WASP-05m_m67_001.xlsx_RoiSetAuto-6.zip Distance px	WASP-05m_m67_001	WASP	36	6591.15	0.464758
WASP-05m_m67_001.xlsx_RoiSetAuto-7.zip Distance px	WASP-05m_m67_001	WASP	16	4127.11	0.586553
WASP-05m_m67_002.xlsx_RoiSetAuto-10.zip Distance px	WASP-05m_m67_002	WASP	64	5568.05	0.860805
WASP-05m_m67_002.xlsx_RoiSetAuto-11.zip Distance px	WASP-05m_m67_002	WASP	88	4571.36	0.7441
WASP-05m_m67_002.xlsx_RoiSetAuto-12.zip Distance px	WASP-05m_m67_002	WASP	20	3914.31	0.289062
WASP-05m_m67_002.xlsx_RoiSetAuto-13.zip Distance px	WASP-05m_m67_002	WASP	20	4536.18	0.240254
WASP-05m_m67_002.xlsx_RoiSetAuto-16.zip Distance px	WASP-05m_m67_002	WASP	16	5556.76	0.744544
WASP-05m_m67_002.xlsx_RoiSetAuto-17.zip Distance px	WASP-05m_m67_002	WASP	40	4453.74	0.581008
WASP-05m_m67_002.xlsx_RoiSetAuto-18.zip Distance px	WASP-05m_m67_002	WASP	16	3976.5	0.536769
WASP-05m_m67_002.xlsx_RoiSetAuto-2.zip Distance px	WASP-05m_m67_002	WASP	204	6403.35	0.993897
WASP-05m_m67_002.xlsx_RoiSetAuto-20.zip Distance px	WASP-05m_m67_002	WASP	20	3851.89	0.511681
WASP-05m_m67_002.xlsx_RoiSetAuto-21.zip Distance px	WASP-05m_m67_002	WASP	24	4661.47	0.51078
WASP-05m_m67_002.xlsx_RoiSetAuto-22.zip Distance px	WASP-05m_m67_002	WASP	28	5154.88	0.486925
WASP-05m_m67_002.xlsx_RoiSetAuto-23.zip Distance px	WASP-05m_m67_002	WASP	20	4728.65	0.258593
WASP-05m_m67_002.xlsx_RoiSetAuto-24.zip Distance px	WASP-05m_m67_002	WASP	16	4132.79	0.614806
WASP-05m_m67_002.xlsx_RoiSetAuto-25.zip Distance px	WASP-05m_m67_002	WASP	24	3895.74	0.495171
WASP-05m_m67_002.xlsx_RoiSetAuto-26.zip Distance px	WASP-05m_m67_002	WASP	16	4541.82	0.116011
WASP-05m_m67_002.xlsx_RoiSetAuto-27.zip Distance px	WASP-05m_m67_002	WASP	48	5163.45	0.46469
WASP-05m_m67_002.xlsx_RoiSetAuto-28.zip Distance px	WASP-05m_m67_002	WASP	16	4347.12	0.594204
WASP-05m_m67_002.xlsx_RoiSetAuto-29.zip Distance px	WASP-05m_m67_002	WASP	16	4536.12	0.586078
WASP-05m_m67_002.xlsx_RoiSetAuto-3.zip Distance px	WASP-05m_m67_002	WASP	132	5017.78	1.12668
WASP-05m_m67_002.xlsx_RoiSetAuto-30.zip Distance px	WASP-05m_m67_002	WASP	16	4662.35	0.270059
WASP-05m_m67_002.xlsx_RoiSetAuto-31.zip Distance px	WASP-05m_m67_002	WASP	36	4712.94	0.913047
WASP-05m_m67_002.xlsx_RoiSetAuto-33.zip Distance px	WASP-05m_m67_002	WASP	20	4828.28	0.420159
WASP-05m_m67_002.xlsx_RoiSetAuto-34.zip Distance px	WASP-05m_m67_002	WASP	24	4258.83	0.489079
WASP-05m_m67_002.xlsx_RoiSetAuto-36.zip Distance px	WASP-05m_m67_002	WASP	68	6761.93	0.507687
WASP-05m_m67_002.xlsx_RoiSetAuto-37.zip Distance px	WASP-05m_m67_002	WASP	20	5322.54	0.27593
WASP-05m_m67_002.xlsx_RoiSetAuto-39.zip Distance px	WASP-05m_m67_002	WASP	20	4631.12	0.706387
WASP-05m_m67_002.xlsx_RoiSetAuto-4.zip Distance px	WASP-05m_m67_002	WASP	36	4012.29	0.616984
WASP-05m_m67_002.xlsx_RoiSetAuto-40.zip Distance px	WASP-05m_m67_002	WASP	28	5219.74	0.410749
WASP-05m_m67_002.xlsx_RoiSetAuto-6.zip Distance px	WASP-05m_m67_002	WASP	24	5004.37	0.470517
WASP-05m_m67_002.xlsx_RoiSetAuto-7.zip Distance px	WASP-05m_m67_002	WASP	24	4691.73	0.832485
WASP-05m_m67_002.xlsx_RoiSetAuto-8.zip Distance px	WASP-05m_m67_002	WASP	68	5995.35	0.610565
WASP-05m_m67_002.xlsx_RoiSetAuto-9.zip Distance px	WASP-05m_m67_002	WASP	24	3900.36	0.418297
WASP-05m_m67_003.xlsx_RoiSetAuto-1.zip Distance px	WASP-05m_m67_003	WASP	364	8388.28	1.15277
WASP-05m_m67_003.xlsx_RoiSetAuto-10.zip Distance px	WASP-05m_m67_003	WASP	40	3956.32	0.739714
WASP-05m_m67_003.xlsx_RoiSetAuto-11.zip Distance px	WASP-05m_m67_003	WASP	24	3943.59	0.579944
WASP-05m_m67_003.xlsx_RoiSetAuto-12.zip Distance px	WASP-05m_m67_003	WASP	44	4342.1	0.754073
WASP-05m_m67_003.xlsx_RoiSetAuto-13.zip Distance px	WASP-05m_m67_003	WASP	44	3714.03	0.449544
WASP-05m_m67_003.xlsx_RoiSetAuto-15.zip Distance px	WASP-05m_m67_003	WASP	28	4053.16	0.197282
WASP-05m_m67_003.xlsx_RoiSetAuto-18.zip Distance px	WASP-05m_m67_003	WASP	32	4174.51	0.761765
WASP-05m_m67_003.xlsx_RoiSetAuto-19.zip Distance px	WASP-05m_m67_003	WASP	24	4375.07	0.596556
WASP-05m_m67_003.xlsx_RoiSetAuto-2.zip Distance px	WASP-05m_m67_003	WASP	28	4343.58	0.871442
WASP-05m_m67_003.xlsx_RoiSetAuto-21.zip Distance px	WASP-05m_m67_003	WASP	32	4330.22	0.612687
WASP-05m_m67_003.xlsx_RoiSetAuto-23.zip Distance px	WASP-05m_m67_003	WASP	24	4559.86	0.412325
WASP-05m_m67_003.xlsx_RoiSetAuto-26.zip Distance px	WASP-05m_m67_003	WASP	16	5381.89	0.586037
WASP-05m_m67_003.xlsx_RoiSetAuto-31.zip Distance px	WASP-05m_m67_003	WASP	32	4869.88	0.540328
WASP-05m_m67_003.xlsx_RoiSetAuto-33.zip Distance px	WASP-05m_m67_003	WASP	16	5322.68	0.308467
WASP-05m_m67_003.xlsx_RoiSetAuto-34.zip Distance px	WASP-05m_m67_003	WASP	32	4815.37	0.411812
WASP-05m_m67_003.xlsx_RoiSetAuto-36.zip Distance px	WASP-05m_m67_003	WASP	20	4808.56	0.827944
WASP-05m_m67_003.xlsx_RoiSetAuto-37.zip Distance px	WASP-05m_m67_003	WASP	16	5561.15	0.169111
WASP-05m_m67_003.xlsx_RoiSetAuto-38.zip Distance px	WASP-05m_m67_003	WASP	20	4927.06	0.433266
WASP-05m_m67_003.xlsx_RoiSetAuto-39.zip Distance px	WASP-05m_m67_003	WASP	20	5142.87	0.312512
WASP-05m_m67_003.xlsx_RoiSetAuto-4.zip Distance px	WASP-05m_m67_003	WASP	192	5987.15	1.05635
WASP-05m_m67_003.xlsx_RoiSetAuto-40.zip Distance px	WASP-05m_m67_003	WASP	24	5886.66	0.829763
WASP-05m_m67_003.xlsx_RoiSetAuto-41.zip Distance px	WASP-05m_m67_003	WASP	16	5078.57	0.256922
WASP-05m_m67_003.xlsx_RoiSetAuto-42.zip Distance px	WASP-05m_m67_003	WASP	28	5574.4	0.303916
WASP-05m_m67_003.xlsx_RoiSetAuto-43.zip Distance px	WASP-05m_m67_003	WASP	32	5400.68	0.46515
WASP-05m_m67_003.xlsx_RoiSetAuto-5.zip Distance px	WASP-05m_m67_003	WASP	20	3572	0.407463
WASP-05m_m67_003.xlsx_RoiSetAuto-6.zip Distance px	WASP-05m_m67_003	WASP	96	6347.25	0.825721
WASP-05m_m67_003.xlsx_RoiSetAuto-9.zip Distance px	WASP-05m_m67_003	WASP	68	3744.06	0.598473

## Sheet: PooledLiveFormula
NMJ	Geno	Duration	MeanIntensity	NormIntensityRange	NMJMean	NormPatchInt	NMJArea
CONT-01m_m67_001	CONT	16	3905.65	0.766228	266.311	14.6657	114.116
CONT-01m_m67_001	CONT	32	2492.2	0.853161	266.311	9.35822	114.116
CONT-01m_m67_001	CONT	84	3775.37	1.59288	266.311	14.1765	114.116
CONT-01m_m67_001	CONT	92	4143.48	0.792231	266.311	15.5588	114.116
CONT-01m_m67_001	CONT	20	2988.08	0.694621	266.311	11.2203	114.116
CONT-01m_m67_001	CONT	16	2431.92	0.265422	266.311	9.1319	114.116
CONT-01m_m67_001	CONT	28	3456.56	0.9836	266.311	12.9794	114.116
CONT-01m_m67_001	CONT	60	3372.52	0.637985	266.311	12.6638	114.116
CONT-01m_m67_001	CONT	48	2941.54	1.18416	266.311	11.0455	114.116
CONT-01m_m67_001	CONT	16	2893.86	0.608972	266.311	10.8665	114.116
CONT-01m_m67_001	CONT	148	4127.62	1.25597	266.311	15.4993	114.116
CONT-01m_m67_001	CONT	52	3294.2	0.884196	266.311	12.3698	114.116
CONT-01m_m67_001	CONT	16	3000.53	0.256592	266.311	11.267	114.116
CONT-01m_m67_001	CONT	16	4016.26	0.553481	266.311	15.0811	114.116
CONT-01m_m67_001	CONT	32	2706.02	0.809772	266.311	10.1611	114.116
CONT-01m_m67_001	CONT	56	4213.08	1.48957	266.311	15.8202	114.116
CONT-01m_m67_001	CONT	16	3344.91	0.402055	266.311	12.5602	114.116
CONT-01m_m67_001	CONT	16	3048.97	0.159436	266.311	11.4489	114.116
CONT-01m_m67_001	CONT	40	3053.51	0.779002	266.311	11.466	114.116
CONT-01m_m67_001	CONT	88	3138.15	1.06305	266.311	11.7838	114.116
CONT-01m_m67_001	CONT	24	2363.31	0.33869	266.311	8.87427	114.116
CONT-01m_m67_001	CONT	28	2754.81	0.520973	266.311	10.3443	114.116
CONT-01m_m67_001	CONT	20	3749.24	0.511695	266.311	14.0784	114.116
CONT-01m_m67_001	CONT	16	2547.49	0.933358	266.311	9.56585	114.116
CONT-01m_m67_001	CONT	24	2461.82	0.385377	266.311	9.24417	114.116
CONT-01m_m67_001	CONT	16	2816.1	0.306011	266.311	10.5745	114.116
CONT-01m_m67_001	CONT	28	2658.49	0.731815	266.311	9.98267	114.116
CONT-01m_m67_001	CONT	40	3249.86	0.821756	266.311	12.2033	114.116
CONT-01m_m67_001	CONT	36	3075.62	0.447613	266.311	11.549	114.116
CONT-01m_m67_001	CONT	156	5583.44	1.40753	266.311	20.9659	114.116
CONT-01m_m67_001	CONT	24	3252.39	0.946496	266.311	12.2128	114.116
CONT-01m_m67_001	CONT	144	3103.86	1.03346	266.311	11.655	114.116
CONT-01m_m67_001	CONT	44	3461.11	0.604261	266.311	12.9965	114.116
CONT-01m_m67_001	CONT	28	3207.36	0.864357	266.311	12.0437	114.116
CONT-01m_m67_001	CONT	56	3639.58	0.92669	266.311	13.6667	114.116
CONT-01m_m67_001	CONT	96	4131.61	0.979854	266.311	15.5142	114.116
CONT-01m_m67_001	CONT	16	2780.13	0.829659	266.311	10.4394	114.116
CONT-01m_m67_001	CONT	20	3638.49	0.805627	266.311	13.6626	114.116
CONT-01m_m67_001	CONT	16	2479.35	0.504997	266.311	9.30998	114.116
CONT-01m_m67_001	CONT	76	3625.78	0.752609	266.311	13.6148	114.116
CONT-01m_m67_001	CONT	40	3491.56	0.911841	266.311	13.1108	114.116
CONT-01m_m67_001	CONT	16	3176.82	0.578825	266.311	11.929	114.116
CONT-01m_m67_001	CONT	112	3847.78	1.18987	266.311	14.4484	114.116
CONT-01m_m67_001	CONT	16	1829.43	0.560963	266.311	6.86955	114.116
CONT-01m_m67_001	CONT	64	3726.64	1.01259	266.311	13.9936	114.116
CONT-01m_m67_001	CONT	36	3826.92	0.571029	266.311	14.3701	114.116
CONT-01m_m67_001	CONT	28	2031.57	0.945463	266.311	7.62857	114.116
CONT-01m_m67_001	CONT	148	7278.22	0.891211	266.311	27.3298	114.116
CONT-01m_m67_001	CONT	68	5260.93	1.84603	266.311	19.7548	114.116
CONT-01m_m67_001	CONT	28	3057.58	0.202103	266.311	11.4812	114.116
CONT-01m_m67_001	CONT	40	3535.52	0.999944	266.311	13.2759	114.116
CONT-01m_m67_001	CONT	24	2203.25	0.315074	266.311	8.27323	114.116
CONT-01m_m67_001	CONT	36	5159.93	0.869855	266.311	19.3756	114.116
CONT-01m_m67_001	CONT	28	3198.98	0.798746	266.311	12.0122	114.116
CONT-01m_m67_001	CONT	68	3665.45	1.03868	266.311	13.7638	114.116
CONT-01m_m67_001	CONT	48	3074.64	0.726625	266.311	11.5453	114.116
CONT-01m_m67_001	CONT	28	3060.22	0.554092	266.311	11.4912	114.116
CONT-01m_m67_001	CONT	60	4401.17	0.822345	266.311	16.5264	114.116
CONT-01m_m67_001	CONT	20	2436.25	0.630933	266.311	9.14815	114.116
CONT-01m_m67_001	CONT	28	2711.03	1.16975	266.311	10.18	114.116
CONT-01m_m67_001	CONT	16	2956.44	0.396167	266.311	11.1015	114.116
CONT-01m_m67_001	CONT	24	2472.19	0.679458	266.311	9.2831	114.116
CONT-01m_m67_001	CONT	16	3550.46	0.694332	266.311	13.332	114.116
CONT-01m_m67_001	CONT	28	3385.48	1.01641	266.311	12.7125	114.116
CONT-01m_m67_001	CONT	24	5003.78	0.706762	266.311	18.7892	114.116
CONT-01m_m67_001	CONT	28	3292.15	0.63057	266.311	12.362	114.116
CONT-01m_m67_001	CONT	16	2593.81	0.38517	266.311	9.7398	114.116
CONT-01m_m67_001	CONT	20	2613.74	0.321389	266.311	9.81463	114.116
CONT-01m_m67_001	CONT	92	6024.23	1.04565	266.311	22.621	114.116
CONT-01m_m67_001	CONT	24	2984.76	0.873711	266.311	11.2078	114.116
CONT-01m_m67_001	CONT	16	2456.01	0.573407	266.311	9.22233	114.116
CONT-01m_m67_001	CONT	16	2926.09	0.778141	266.311	10.9875	114.116
CONT-01m_m67_001	CONT	36	4140.03	0.573672	266.311	15.5459	114.116
CONT-01m_m67_002	CONT	60	7337.3	0.989335	433.7	16.9179	22.2756
CONT-01m_m67_002	CONT	24	6497.71	0.54937	433.7	14.982	22.2756
CONT-01m_m67_002	CONT	16	4061.79	0.182043	433.7	9.36543	22.2756
CONT-01m_m67_002	CONT	16	3634.2	0.395602	433.7	8.37952	22.2756
CONT-01m_m67_002	CONT	28	4311.5	1.03092	433.7	9.9412	22.2756
CONT-01m_m67_002	CONT	84	7933.71	1.33123	433.7	18.2931	22.2756
CONT-01m_m67_002	CONT	28	5030.1	0.583608	433.7	11.5981	22.2756
CONT-01m_m67_002	CONT	28	3968.86	0.851955	433.7	9.15117	22.2756
CONT-01m_m67_002	CONT	44	5040.82	0.776255	433.7	11.6228	22.2756
CONT-01m_m67_002	CONT	20	4556.69	0.690302	433.7	10.5066	22.2756
CONT-01m_m67_002	CONT	36	4909.96	0.898424	433.7	11.3211	22.2756
CONT-01m_m67_002	CONT	16	5668.7	0.164375	433.7	13.0706	22.2756
CONT-01m_m67_002	CONT	80	5454.31	1.05658	433.7	12.5762	22.2756
CONT-01m_m67_002	CONT	28	4960.52	0.859422	433.7	11.4377	22.2756
CONT-01m_m67_002	CONT	180	11233.6	1.50879	433.7	25.9017	22.2756
CONT-01m_m67_002	CONT	40	7032.42	0.481288	433.7	16.2149	22.2756
CONT-01m_m67_002	CONT	24	6639.91	0.897696	433.7	15.3099	22.2756
CONT-01m_m67_002	CONT	32	4693.71	0.419126	433.7	10.8225	22.2756
CONT-01m_m67_002	CONT	20	5003.07	0.396637	433.7	11.5358	22.2756
CONT-01m_m67_002	CONT	16	3412.15	0.30039	433.7	7.86754	22.2756
CONT-01m_m67_002	CONT	44	5980.15	0.664352	433.7	13.7887	22.2756
CONT-01m_m67_002	CONT	180	8904.53	1.601	433.7	20.5315	22.2756
CONT-01m_m67_002	CONT	28	3836.82	0.592548	433.7	8.84671	22.2756
CONT-01m_m67_002	CONT	20	4406.74	0.451557	433.7	10.1608	22.2756
CONT-01m_m67_002	CONT	16	5258.99	0.525358	433.7	12.1259	22.2756
CONT-01m_m67_002	CONT	24	4760.79	0.664227	433.7	10.9772	22.2756
CONT-01m_m67_002	CONT	36	5458.05	0.736713	433.7	12.5848	22.2756
CONT-01m_m67_002	CONT	16	5749.58	0.75346	433.7	13.257	22.2756
CONT-01m_m67_002	CONT	20	6766.46	0.267975	433.7	15.6017	22.2756
CONT-01m_m67_002	CONT	20	5637.83	0.42163	433.7	12.9994	22.2756
CONT-01m_m67_002	CONT	16	4681.74	0.405984	433.7	10.7949	22.2756
CONT-01m_m67_002	CONT	40	5121.63	0.628057	433.7	11.8092	22.2756
CONT-01m_m67_002	CONT	28	4553.39	0.68206	433.7	10.4989	22.2756
CONT-01m_m67_002	CONT	104	14420.3	1.00697	433.7	33.2496	22.2756
CONT-01m_m67_002	CONT	24	5852.52	0.670077	433.7	13.4944	22.2756
CONT-01m_m67_002	CONT	72	8607.09	1.37408	433.7	19.8457	22.2756
CONT-01m_m67_002	CONT	16	4912.66	0.437748	433.7	11.3273	22.2756
CONT-01m_m67_002	CONT	36	5996.8	0.709467	433.7	13.8271	22.2756
CONT-01m_m67_002	CONT	16	4485.27	0.307479	433.7	10.3419	22.2756
CONT-01m_m67_002	CONT	20	5311.48	0.717341	433.7	12.2469	22.2756
CONT-01m_m67_002	CONT	80	11760.5	1.02015	433.7	27.1167	22.2756
CONT-01m_m67_002	CONT	64	8796.32	0.746752	433.7	20.282	22.2756
CONT-01m_m67_002	CONT	36	9210.89	0.78958	433.7	21.2379	22.2756
CONT-01m_m67_002	CONT	16	4120.02	0.301327	433.7	9.4997	22.2756
CONT-01m_m67_002	CONT	88	7709.46	1.39038	433.7	17.776	22.2756
CONT-01m_m67_002	CONT	88	8347.93	1.92274	433.7	19.2482	22.2756
CONT-01m_m67_002	CONT	76	8067.75	1.0284	433.7	18.6022	22.2756
CONT-01m_m67_002	CONT	52	8386.29	1.26549	433.7	19.3366	22.2756
CONT-01m_m67_002	CONT	80	7005.03	0.744453	433.7	16.1518	22.2756
CONT-01m_m67_002	CONT	68	6880.51	0.691405	433.7	15.8647	22.2756
CONT-01m_m67_002	CONT	16	4486.48	0.294333	433.7	10.3447	22.2756
CONT-01m_m67_002	CONT	16	5150.14	0.761527	433.7	11.8749	22.2756
CONT-01m_m67_002	CONT	16	5036.34	0.506484	433.7	11.6125	22.2756
CONT-01m_m67_002	CONT	44	5858.24	0.683847	433.7	13.5076	22.2756
CONT-01m_m67_002	CONT	52	5920.96	0.977334	433.7	13.6522	22.2756
CONT-01m_m67_002	CONT	52	7045.49	0.627145	433.7	16.2451	22.2756
CONT-01m_m67_002	CONT	28	5034.63	0.758962	433.7	11.6086	22.2756
CONT-01m_m67_002	CONT	28	5384.52	0.643876	433.7	12.4153	22.2756
CONT-01m_m67_002	CONT	36	5784.51	0.651808	433.7	13.3376	22.2756
CONT-01m_m67_002	CONT	32	6220.41	0.704335	433.7	14.3426	22.2756
CONT-01m_m67_002	CONT	36	5525.5	0.877673	433.7	12.7404	22.2756
CONT-01m_m67_002	CONT	100	8797.33	1.02544	433.7	20.2844	22.2756
CONT-01m_m67_002	CONT	20	5037.89	0.381313	433.7	11.6161	22.2756
CONT-01m_m67_003	CONT	28	6875.2	0.641585	514.101	13.3732	81.4044
CONT-01m_m67_003	CONT	52	8475.98	0.70496	514.101	16.487	81.4044
CONT-01m_m67_003	CONT	80	9456.74	1.08085	514.101	18.3947	81.4044
CONT-01m_m67_003	CONT	48	5599.84	0.753888	514.101	10.8925	81.4044
CONT-01m_m67_003	CONT	72	10808.6	1.38666	514.101	21.0242	81.4044
CONT-01m_m67_003	CONT	16	5502.88	0.421196	514.101	10.7039	81.4044
CONT-01m_m67_003	CONT	124	9734.49	1.37824	514.101	18.935	81.4044
CONT-01m_m67_003	CONT	24	6944.44	0.800426	514.101	13.5079	81.4044
CONT-01m_m67_003	CONT	72	7332.27	0.769586	514.101	14.2623	81.4044
CONT-01m_m67_003	CONT	28	5825.62	0.487423	514.101	11.3317	81.4044
CONT-01m_m67_003	CONT	116	10964.9	1.1332	514.101	21.3282	81.4044
CONT-01m_m67_003	CONT	24	5445.37	0.714967	514.101	10.592	81.4044
CONT-01m_m67_003	CONT	112	11545.4	1.14788	514.101	22.4574	81.4044
CONT-01m_m67_003	CONT	108	9037.33	1.29585	514.101	17.5789	81.4044
CONT-01m_m67_003	CONT	52	4867.02	0.498826	514.101	9.46704	81.4044
CONT-01m_m67_003	CONT	60	7111.39	0.874307	514.101	13.8327	81.4044
CONT-01m_m67_003	CONT	24	5477.78	0.413198	514.101	10.6551	81.4044
CONT-01m_m67_003	CONT	52	5738.97	0.651524	514.101	11.1631	81.4044
CONT-01m_m67_003	CONT	56	6489.22	0.816118	514.101	12.6225	81.4044
CONT-01m_m67_003	CONT	40	5842.05	0.970394	514.101	11.3636	81.4044
CONT-01m_m67_003	CONT	56	7577.41	0.632481	514.101	14.7391	81.4044
CONT-01m_m67_003	CONT	72	7255.56	0.99146	514.101	14.1131	81.4044
CONT-01m_m67_003	CONT	48	6062.68	1.08021	514.101	11.7928	81.4044
CONT-01m_m67_003	CONT	16	4768.17	0.227868	514.101	9.27478	81.4044
CONT-01m_m67_003	CONT	28	6883.77	0.542097	514.101	13.3899	81.4044
CONT-01m_m67_003	CONT	16	5187.03	0.194553	514.101	10.0895	81.4044
CONT-01m_m67_003	CONT	56	5475.72	0.794258	514.101	10.6511	81.4044
CONT-01m_m67_003	CONT	20	7411.37	0.335834	514.101	14.4162	81.4044
CONT-01m_m67_003	CONT	96	9170.4	0.924846	514.101	17.8377	81.4044
CONT-01m_m67_003	CONT	84	8645.28	1.29956	514.101	16.8163	81.4044
CONT-01m_m67_003	CONT	36	6291.45	0.928587	514.101	12.2378	81.4044
CONT-01m_m67_003	CONT	56	6828.58	0.638115	514.101	13.2826	81.4044
CONT-01m_m67_003	CONT	52	9210.08	1.81947	514.101	17.9149	81.4044
CONT-01m_m67_003	CONT	84	6493.77	0.867634	514.101	12.6313	81.4044
CONT-01m_m67_003	CONT	16	5362.13	0.17673	514.101	10.4301	81.4044
CONT-01m_m67_003	CONT	48	9281.49	0.892207	514.101	18.0538	81.4044
CONT-01m_m67_003	CONT	52	17134.2	1.11641	514.101	33.3285	81.4044
CONT-01m_m67_003	CONT	16	6214.97	0.409048	514.101	12.089	81.4044
CONT-01m_m67_003	CONT	32	8834.26	1.00575	514.101	17.1839	81.4044
CONT-01m_m67_003	CONT	28	6217.65	0.763278	514.101	12.0942	81.4044
CONT-01m_m67_003	CONT	28	6007.75	0.497501	514.101	11.6859	81.4044
CONT-01m_m67_003	CONT	24	5755.65	1.04615	514.101	11.1956	81.4044
CONT-01m_m67_003	CONT	68	8578.87	0.991393	514.101	16.6871	81.4044
CONT-01m_m67_003	CONT	204	13594	1.20984	514.101	26.4423	81.4044
CONT-01m_m67_003	CONT	48	8837.22	0.975853	514.101	17.1897	81.4044
CONT-01m_m67_003	CONT	56	5487.68	1.14877	514.101	10.6743	81.4044
CONT-02m_m67_001	CONT	36	13508.9	0.700262	752.958	17.9412	112.196
CONT-02m_m67_001	CONT	20	8329.06	0.602355	752.958	11.0618	112.196
CONT-02m_m67_001	CONT	28	6896.12	0.419353	752.958	9.15871	112.196
CONT-02m_m67_001	CONT	16	7749.1	0.26244	752.958	10.2915	112.196
CONT-02m_m67_001	CONT	56	10505	0.899449	752.958	13.9516	112.196
CONT-02m_m67_001	CONT	28	7359.03	0.505461	752.958	9.77349	112.196
CONT-02m_m67_001	CONT	44	8600.94	0.591353	752.958	11.4229	112.196
CONT-02m_m67_001	CONT	16	7563.81	0.605887	752.958	10.0455	112.196
CONT-02m_m67_001	CONT	36	7904.02	0.474106	752.958	10.4973	112.196
CONT-02m_m67_001	CONT	24	7637.25	0.287487	752.958	10.143	112.196
CONT-02m_m67_001	CONT	32	8528.41	0.746589	752.958	11.3265	112.196
CONT-02m_m67_001	CONT	20	7496.61	0.233948	752.958	9.95621	112.196
CONT-02m_m67_001	CONT	28	8110.54	0.364191	752.958	10.7716	112.196
CONT-02m_m67_001	CONT	172	14023.3	1.20626	752.958	18.6242	112.196
CONT-02m_m67_001	CONT	64	14959.3	0.623893	752.958	19.8674	112.196
CONT-02m_m67_001	CONT	40	8863.75	0.618812	752.958	11.7719	112.196
CONT-02m_m67_001	CONT	44	8068.04	0.515922	752.958	10.7151	112.196
CONT-02m_m67_001	CONT	16	6096.08	0.124193	752.958	8.09618	112.196
CONT-02m_m67_001	CONT	20	6224.76	0.453836	752.958	8.26707	112.196
CONT-02m_m67_001	CONT	20	7774.25	0.454438	752.958	10.3249	112.196
CONT-02m_m67_001	CONT	40	14759.2	0.482389	752.958	19.6017	112.196
CONT-02m_m67_001	CONT	24	7316.74	0.282353	752.958	9.71732	112.196
CONT-02m_m67_001	CONT	92	14868	0.827287	752.958	19.7461	112.196
CONT-02m_m67_001	CONT	32	9142.57	0.745302	752.958	12.1422	112.196
CONT-02m_m67_001	CONT	20	7058.3	0.440018	752.958	9.3741	112.196
CONT-02m_m67_001	CONT	20	9208.89	0.670231	752.958	12.2303	112.196
CONT-02m_m67_001	CONT	76	8672.07	0.986086	752.958	11.5173	112.196
CONT-02m_m67_001	CONT	64	10360.9	0.734289	752.958	13.7602	112.196
CONT-02m_m67_001	CONT	16	6775.81	0.159459	752.958	8.99893	112.196
CONT-02m_m67_001	CONT	20	10863	0.573335	752.958	14.4271	112.196
CONT-02m_m67_001	CONT	20	8475.35	0.621494	752.958	11.2561	112.196
CONT-02m_m67_001	CONT	148	10139.7	1.03165	752.958	13.4665	112.196
CONT-02m_m67_001	CONT	36	10462.3	0.906932	752.958	13.895	112.196
CONT-02m_m67_001	CONT	24	9073.52	0.486355	752.958	12.0505	112.196
CONT-02m_m67_001	CONT	32	13272.8	0.818605	752.958	17.6275	112.196
CONT-02m_m67_001	CONT	40	8196.02	0.744675	752.958	10.8851	112.196
CONT-02m_m67_001	CONT	48	8586.73	0.714676	752.958	11.404	112.196
CONT-02m_m67_001	CONT	28	8271.07	0.407998	752.958	10.9848	112.196
CONT-02m_m67_001	CONT	20	8181.1	0.408154	752.958	10.8653	112.196
CONT-02m_m67_001	CONT	28	10183.8	0.935448	752.958	13.525	112.196
CONT-02m_m67_001	CONT	40	8986.48	0.46341	752.958	11.9349	112.196
CONT-02m_m67_001	CONT	68	10704.4	0.575586	752.958	14.2164	112.196
CONT-02m_m67_001	CONT	96	13989.1	1.27624	752.958	18.5789	112.196
CONT-02m_m67_001	CONT	20	8771.9	0.498852	752.958	11.6499	112.196
CONT-02m_m67_001	CONT	104	11261.4	0.80643	752.958	14.9562	112.196
CONT-02m_m67_001	CONT	24	8089.98	0.519126	752.958	10.7443	112.196
CONT-02m_m67_001	CONT	16	7554.36	0.17527	752.958	10.0329	112.196
CONT-02m_m67_001	CONT	16	9033.71	0.378714	752.958	11.9976	112.196
CONT-02m_m67_001	CONT	20	10396	0.452193	752.958	13.8068	112.196
CONT-02m_m67_001	CONT	24	7994.49	0.671243	752.958	10.6174	112.196
CONT-02m_m67_001	CONT	20	8868.43	0.392889	752.958	11.7781	112.196
CONT-02m_m67_001	CONT	16	9949.15	0.449823	752.958	13.2134	112.196
CONT-02m_m67_001	CONT	276	13459.8	1.07526	752.958	17.8759	112.196
CONT-02m_m67_001	CONT	20	10009.4	0.482129	752.958	13.2934	112.196
CONT-02m_m67_001	CONT	36	8979.21	0.362407	752.958	11.9252	112.196
CONT-02m_m67_001	CONT	24	10429.9	0.437818	752.958	13.8518	112.196
CONT-02m_m67_001	CONT	16	7520.6	0.199228	752.958	9.98807	112.196
CONT-02m_m67_001	CONT	92	12971.6	0.747973	752.958	17.2275	112.196
CONT-02m_m67_001	CONT	28	8876.22	0.509912	752.958	11.7885	112.196
CONT-02m_m67_001	CONT	48	11088.9	0.830872	752.958	14.7271	112.196
CONT-02m_m67_001	CONT	80	12598.7	0.84959	752.958	16.7322	112.196
CONT-02m_m67_001	CONT	24	9442.51	0.331405	752.958	12.5406	112.196
CONT-02m_m67_001	CONT	80	9297.83	0.785245	752.958	12.3484	112.196
CONT-02m_m67_001	CONT	20	7010.31	0.275078	752.958	9.31036	112.196
CONT-02m_m67_001	CONT	20	9984.18	0.790909	752.958	13.2599	112.196
CONT-02m_m67_001	CONT	72	18718.8	0.959017	752.958	24.8603	112.196
CONT-02m_m67_001	CONT	60	7841.26	0.659439	752.958	10.4139	112.196
CONT-02m_m67_001	CONT	28	10246	0.395458	752.958	13.6077	112.196
CONT-02m_m67_001	CONT	60	14463.9	0.875764	752.958	19.2094	112.196
CONT-02m_m67_001	CONT	68	10564.1	0.824692	752.958	14.0301	112.196
CONT-02m_m67_001	CONT	24	10345.9	0.337235	752.958	13.7403	112.196
CONT-02m_m67_001	CONT	44	11114.6	0.714719	752.958	14.7613	112.196
CONT-02m_m67_001	CONT	16	7719.36	0.716143	752.958	10.2521	112.196
CONT-02m_m67_001	CONT	28	14327.3	0.634036	752.958	19.028	112.196
CONT-02m_m67_001	CONT	32	7327.9	0.658476	752.958	9.73215	112.196
CONT-02m_m67_001	CONT	36	10341.9	0.389332	752.958	13.735	112.196
CONT-02m_m67_001	CONT	32	14701.4	0.785282	752.958	19.5248	112.196
CONT-02m_m67_001	CONT	16	8592.37	0.259918	752.958	11.4115	112.196
CONT-02m_m67_001	CONT	16	8658.14	0.618007	752.958	11.4988	112.196
CONT-02m_m67_001	CONT	16	9717.73	0.273907	752.958	12.9061	112.196
CONT-02m_m67_001	CONT	16	14691.7	0.520729	752.958	19.512	112.196
CONT-02m_m67_001	CONT	44	10747.5	0.721685	752.958	14.2737	112.196
CONT-02m_m67_002	CONT	44	8761.36	0.847158	387.294	22.622	24.1244
CONT-02m_m67_002	CONT	140	6667.48	1.38906	387.294	17.2155	24.1244
CONT-02m_m67_002	CONT	16	4128.52	0.453299	387.294	10.6599	24.1244
CONT-02m_m67_002	CONT	16	4332.4	0.263994	387.294	11.1863	24.1244
CONT-02m_m67_002	CONT	40	3485.2	0.934585	387.294	8.99886	24.1244
CONT-02m_m67_002	CONT	184	4902.4	0.806989	387.294	12.6581	24.1244
CONT-02m_m67_002	CONT	28	4208.36	0.575461	387.294	10.866	24.1244
CONT-02m_m67_002	CONT	44	6866.62	0.616947	387.294	17.7297	24.1244
CONT-02m_m67_002	CONT	112	5083	1.46956	387.294	13.1244	24.1244
CONT-02m_m67_002	CONT	20	3967.68	0.288711	387.294	10.2446	24.1244
CONT-02m_m67_002	CONT	16	4189.86	0.283253	387.294	10.8183	24.1244
CONT-02m_m67_002	CONT	72	6796.29	1.02627	387.294	17.5481	24.1244
CONT-02m_m67_002	CONT	188	6565.19	1.39729	387.294	16.9514	24.1244
CONT-02m_m67_002	CONT	36	6936.78	0.679278	387.294	17.9109	24.1244
CONT-02m_m67_002	CONT	52	5321.19	0.686817	387.294	13.7394	24.1244
CONT-02m_m67_002	CONT	96	5405.91	0.810798	387.294	13.9582	24.1244
CONT-02m_m67_002	CONT	28	4851.58	0.601106	387.294	12.5269	24.1244
CONT-02m_m67_002	CONT	16	5310.56	0.393716	387.294	13.712	24.1244
CONT-02m_m67_002	CONT	20	3878.55	1.16308	387.294	10.0145	24.1244
CONT-02m_m67_002	CONT	32	4308.1	0.406036	387.294	11.1236	24.1244
CONT-02m_m67_002	CONT	44	6030.52	0.650572	387.294	15.5709	24.1244
CONT-02m_m67_002	CONT	16	3650.48	0.4555	387.294	9.4256	24.1244
CONT-02m_m67_002	CONT	152	6701.44	1.45209	387.294	17.3032	24.1244
CONT-02m_m67_002	CONT	28	4573.95	0.531445	387.294	11.81	24.1244
CONT-02m_m67_002	CONT	40	4079.79	0.447008	387.294	10.5341	24.1244
CONT-02m_m67_002	CONT	100	6041.93	1.12207	387.294	15.6004	24.1244
CONT-02m_m67_002	CONT	56	4552.47	0.788942	387.294	11.7546	24.1244
CONT-02m_m67_002	CONT	56	6168.04	1.13725	387.294	15.926	24.1244
CONT-02m_m67_003	CONT	20	10394.4	0.281194	972.67	10.6865	74.7733
CONT-02m_m67_003	CONT	40	11281.5	0.370847	972.67	11.5985	74.7733
CONT-02m_m67_003	CONT	96	17447	1.05681	972.67	17.9372	74.7733
CONT-02m_m67_003	CONT	76	18617.4	1.54303	972.67	19.1405	74.7733
CONT-02m_m67_003	CONT	36	16208.4	1.0761	972.67	16.6638	74.7733
CONT-02m_m67_003	CONT	44	15836.4	0.658826	972.67	16.2814	74.7733
CONT-02m_m67_003	CONT	44	17937.4	0.747977	972.67	18.4414	74.7733
CONT-02m_m67_003	CONT	20	9195.29	0.104095	972.67	9.45365	74.7733
CONT-02m_m67_003	CONT	24	10499.9	0.521055	972.67	10.795	74.7733
CONT-02m_m67_003	CONT	32	15669.8	0.67393	972.67	16.11	74.7733
CONT-02m_m67_003	CONT	56	14619.3	0.625838	972.67	15.03	74.7733
CONT-02m_m67_003	CONT	68	19939.9	0.995168	972.67	20.5001	74.7733
CONT-02m_m67_003	CONT	72	13047.1	0.67609	972.67	13.4137	74.7733
CONT-02m_m67_003	CONT	80	19588.4	1.10304	972.67	20.1388	74.7733
CONT-02m_m67_003	CONT	20	9095.88	0.679979	972.67	9.35145	74.7733
CONT-02m_m67_003	CONT	20	12421.4	0.494684	972.67	12.7704	74.7733
CONT-02m_m67_003	CONT	20	9865.65	0.562861	972.67	10.1428	74.7733
CONT-02m_m67_003	CONT	112	19248.7	1.28011	972.67	19.7896	74.7733
CONT-02m_m67_003	CONT	52	12220.2	0.584182	972.67	12.5635	74.7733
CONT-02m_m67_003	CONT	16	11818.5	0.370568	972.67	12.1505	74.7733
CONT-02m_m67_003	CONT	32	14033.8	1.2355	972.67	14.4281	74.7733
CONT-02m_m67_003	CONT	32	13636	0.441795	972.67	14.0191	74.7733
CONT-02m_m67_003	CONT	68	18846	1.09907	972.67	19.3755	74.7733
CONT-02m_m67_003	CONT	68	14860.9	0.902185	972.67	15.2785	74.7733
CONT-02m_m67_003	CONT	48	20691.4	0.919562	972.67	21.2727	74.7733
CONT-02m_m67_003	CONT	24	12843.8	0.464859	972.67	13.2047	74.7733
CONT-02m_m67_003	CONT	32	12782.5	0.776083	972.67	13.1416	74.7733
CONT-02m_m67_003	CONT	16	10850	1.00217	972.67	11.1549	74.7733
CONT-02m_m67_003	CONT	56	18364.2	0.767732	972.67	18.8802	74.7733
CONT-02m_m67_003	CONT	68	19413.8	0.699196	972.67	19.9593	74.7733
CONT-02m_m67_003	CONT	88	13957.5	0.995791	972.67	14.3497	74.7733
CONT-02m_m67_003	CONT	20	13465.3	0.451915	972.67	13.8436	74.7733
CONT-02m_m67_003	CONT	32	16209.4	0.37127	972.67	16.6648	74.7733
CONT-02m_m67_003	CONT	20	15330.9	0.574865	972.67	15.7617	74.7733
CONT-02m_m67_003	CONT	48	14147.4	0.893424	972.67	14.5449	74.7733
CONT-03m_m67_001	CONT	20	4799.34	0.320035	483.304	9.93028	117.013
CONT-03m_m67_001	CONT	24	4999.28	0.920632	483.304	10.344	117.013
CONT-03m_m67_001	CONT	56	5836.82	0.536172	483.304	12.0769	117.013
CONT-03m_m67_001	CONT	20	4640.91	0.261093	483.304	9.60248	117.013
CONT-03m_m67_001	CONT	152	8869.25	1.34951	483.304	18.3513	117.013
CONT-03m_m67_001	CONT	28	5074.48	0.876254	483.304	10.4996	117.013
CONT-03m_m67_001	CONT	28	6446.36	0.846114	483.304	13.3381	117.013
CONT-03m_m67_001	CONT	28	5998.4	0.894797	483.304	12.4113	117.013
CONT-03m_m67_001	CONT	24	5890.64	0.357393	483.304	12.1883	117.013
CONT-03m_m67_001	CONT	20	4420.16	0.311997	483.304	9.14572	117.013
CONT-03m_m67_001	CONT	24	6557.64	0.255489	483.304	13.5684	117.013
CONT-03m_m67_001	CONT	140	8729.59	1.16239	483.304	18.0623	117.013
CONT-03m_m67_001	CONT	28	6528.51	0.696617	483.304	13.5081	117.013
CONT-03m_m67_001	CONT	84	7890.47	0.987008	483.304	16.3261	117.013
CONT-03m_m67_001	CONT	28	5317.47	0.855541	483.304	11.0023	117.013
CONT-03m_m67_001	CONT	20	4244.67	0.708898	483.304	8.78261	117.013
CONT-03m_m67_001	CONT	32	5327.8	0.659144	483.304	11.0237	117.013
CONT-03m_m67_001	CONT	48	5721.25	0.899363	483.304	11.8378	117.013
CONT-03m_m67_001	CONT	20	4907.15	0.625272	483.304	10.1534	117.013
CONT-03m_m67_001	CONT	52	5114.47	0.547235	483.304	10.5823	117.013
CONT-03m_m67_001	CONT	20	5004.43	0.735965	483.304	10.3546	117.013
CONT-03m_m67_001	CONT	36	6178.45	1.04015	483.304	12.7838	117.013
CONT-03m_m67_001	CONT	20	5370.27	0.426615	483.304	11.1116	117.013
CONT-03m_m67_001	CONT	28	4163.54	0.297453	483.304	8.61475	117.013
CONT-03m_m67_001	CONT	48	5972.17	0.830371	483.304	12.357	117.013
CONT-03m_m67_001	CONT	48	5636.62	0.598966	483.304	11.6627	117.013
CONT-03m_m67_001	CONT	60	6332.11	0.715045	483.304	13.1017	117.013
CONT-03m_m67_001	CONT	80	9179.18	1.0279	483.304	18.9926	117.013
CONT-03m_m67_001	CONT	92	6756.3	1.20629	483.304	13.9794	117.013
CONT-03m_m67_001	CONT	24	6091.97	0.471667	483.304	12.6049	117.013
CONT-03m_m67_001	CONT	80	5525.11	0.78945	483.304	11.432	117.013
CONT-03m_m67_001	CONT	56	6960.9	1.11585	483.304	14.4028	117.013
CONT-03m_m67_001	CONT	44	12578.9	0.679636	483.304	26.027	117.013
CONT-03m_m67_001	CONT	268	10612.6	0.864565	483.304	21.9584	117.013
CONT-03m_m67_001	CONT	28	5738.5	0.523706	483.304	11.8735	117.013
CONT-03m_m67_001	CONT	48	6067.63	0.783974	483.304	12.5545	117.013
CONT-03m_m67_001	CONT	20	5128.26	0.208356	483.304	10.6109	117.013
CONT-03m_m67_001	CONT	24	5308.61	0.365892	483.304	10.984	117.013
CONT-03m_m67_001	CONT	92	8827.22	1.12239	483.304	18.2643	117.013
CONT-03m_m67_001	CONT	48	5962.01	0.685043	483.304	12.336	117.013
CONT-03m_m67_001	CONT	20	5682.96	0.516515	483.304	11.7586	117.013
CONT-03m_m67_001	CONT	104	11116.7	0.710865	483.304	23.0015	117.013
CONT-03m_m67_001	CONT	16	5541.21	0.411587	483.304	11.4653	117.013
CONT-03m_m67_001	CONT	24	5067	0.68144	483.304	10.4841	117.013
CONT-03m_m67_001	CONT	20	5168.9	0.283802	483.304	10.6949	117.013
CONT-03m_m67_001	CONT	20	4189.33	0.258334	483.304	8.66812	117.013
CONT-03m_m67_001	CONT	84	7362.81	1.3373	483.304	15.2343	117.013
CONT-03m_m67_001	CONT	40	6141.58	0.532458	483.304	12.7075	117.013
CONT-03m_m67_001	CONT	84	7171.9	1.4423	483.304	14.8393	117.013
CONT-03m_m67_001	CONT	28	4982.87	0.392809	483.304	10.31	117.013
CONT-03m_m67_001	CONT	36	7122.24	0.465447	483.304	14.7366	117.013
CONT-03m_m67_001	CONT	16	4324.44	0.824874	483.304	8.94766	117.013
CONT-03m_m67_001	CONT	48	5106.8	0.703099	483.304	10.5664	117.013
CONT-03m_m67_001	CONT	20	4544.32	0.417289	483.304	9.40262	117.013
CONT-03m_m67_001	CONT	40	6939.25	0.903666	483.304	14.358	117.013
CONT-03m_m67_001	CONT	20	5642.93	0.556912	483.304	11.6757	117.013
CONT-03m_m67_001	CONT	36	7720.98	0.70716	483.304	15.9754	117.013
CONT-03m_m67_001	CONT	24	6081.75	0.653623	483.304	12.5837	117.013
CONT-03m_m67_001	CONT	16	7884.74	0.686223	483.304	16.3143	117.013
CONT-03m_m67_002	CONT	44	1999.98	1.44927	130.311	15.3478	42.7556
CONT-03m_m67_002	CONT	28	1922.18	0.368443	130.311	14.7507	42.7556
CONT-03m_m67_002	CONT	28	1536.56	0.658701	130.311	11.7915	42.7556
CONT-03m_m67_002	CONT	16	1446.95	0.511233	130.311	11.1038	42.7556
CONT-03m_m67_002	CONT	24	1390.18	0.363372	130.311	10.6682	42.7556
CONT-03m_m67_002	CONT	24	1471.45	0.729851	130.311	11.2918	42.7556
CONT-03m_m67_002	CONT	52	1683.21	1.04291	130.311	12.9169	42.7556
CONT-03m_m67_002	CONT	16	1382.19	0.367468	130.311	10.6069	42.7556
CONT-03m_m67_002	CONT	32	1934	1.33643	130.311	14.8414	42.7556
CONT-03m_m67_002	CONT	16	1863.59	0.293381	130.311	14.3011	42.7556
CONT-03m_m67_002	CONT	48	1432.69	0.758817	130.311	10.9944	42.7556
CONT-03m_m67_002	CONT	40	1622.51	1.5861	130.311	12.4511	42.7556
CONT-03m_m67_002	CONT	16	1761.84	0.553384	130.311	13.5203	42.7556
CONT-03m_m67_002	CONT	24	1340.39	0.905187	130.311	10.2861	42.7556
CONT-03m_m67_002	CONT	44	1722.57	0.952922	130.311	13.219	42.7556
CONT-03m_m67_002	CONT	36	1677.59	0.688284	130.311	12.8737	42.7556
CONT-03m_m67_002	CONT	24	1467.99	0.651034	130.311	11.2653	42.7556
CONT-03m_m67_002	CONT	52	1700.09	0.745925	130.311	13.0465	42.7556
CONT-03m_m67_002	CONT	28	1595.34	0.581949	130.311	12.2426	42.7556
CONT-03m_m67_002	CONT	16	1370.32	0.323137	130.311	10.5158	42.7556
CONT-03m_m67_002	CONT	20	1263.83	0.954572	130.311	9.69863	42.7556
CONT-03m_m67_002	CONT	28	1483.11	0.614487	130.311	11.3814	42.7556
CONT-03m_m67_002	CONT	36	1627.55	0.784224	130.311	12.4898	42.7556
CONT-03m_m67_002	CONT	40	2213.53	0.785943	130.311	16.9865	42.7556
CONT-03m_m67_002	CONT	16	1766.01	0.530713	130.311	13.5523	42.7556
CONT-03m_m67_002	CONT	24	1956.81	0.449267	130.311	15.0165	42.7556
CONT-03m_m67_002	CONT	20	1455.59	1.07434	130.311	11.1701	42.7556
CONT-03m_m67_002	CONT	16	1639.07	0.35751	130.311	12.5782	42.7556
CONT-03m_m67_002	CONT	20	1466.27	0.608931	130.311	11.2521	42.7556
CONT-03m_m67_002	CONT	16	1649.79	1.03304	130.311	12.6605	42.7556
CONT-03m_m67_002	CONT	16	2070.21	0.431374	130.311	15.8867	42.7556
CONT-03m_m67_002	CONT	32	1753.61	0.513248	130.311	13.4571	42.7556
CONT-03m_m67_002	CONT	24	2092.26	0.614867	130.311	16.056	42.7556
CONT-03m_m67_002	CONT	16	1653.23	1.16533	130.311	12.6868	42.7556
CONT-03m_m67_003	CONT	124	5599.6	1.23408	352.49	15.8858	104.107
CONT-03m_m67_003	CONT	56	6695.31	0.972099	352.49	18.9943	104.107
CONT-03m_m67_003	CONT	104	5342.31	1.28045	352.49	15.1559	104.107
CONT-03m_m67_003	CONT	56	4234.71	0.924675	352.49	12.0137	104.107
CONT-03m_m67_003	CONT	136	9601.99	1.21289	352.49	27.2404	104.107
CONT-03m_m67_003	CONT	36	3809.89	1.06529	352.49	10.8085	104.107
CONT-03m_m67_003	CONT	16	5556.35	0.661593	352.49	15.7631	104.107
CONT-03m_m67_003	CONT	20	3424.65	0.516933	352.49	9.71558	104.107
CONT-03m_m67_003	CONT	44	3338.52	0.729098	352.49	9.47124	104.107
CONT-03m_m67_003	CONT	20	2996.01	0.956855	352.49	8.49955	104.107
CONT-03m_m67_003	CONT	16	3845.39	0.484025	352.49	10.9092	104.107
CONT-03m_m67_003	CONT	60	4912.22	0.585536	352.49	13.9357	104.107
CONT-03m_m67_003	CONT	28	3572.25	0.556495	352.49	10.1343	104.107
CONT-03m_m67_003	CONT	24	3143.12	0.338484	352.49	8.9169	104.107
CONT-03m_m67_003	CONT	60	5174.99	0.988235	352.49	14.6812	104.107
CONT-03m_m67_003	CONT	108	3461.08	0.907635	352.49	9.81894	104.107
CONT-03m_m67_003	CONT	32	4686.48	0.757601	352.49	13.2953	104.107
CONT-03m_m67_003	CONT	16	3612.04	0.204038	352.49	10.2472	104.107
CONT-03m_m67_003	CONT	24	4232.83	0.800814	352.49	12.0084	104.107
CONT-03m_m67_003	CONT	60	4179.08	0.970781	352.49	11.8559	104.107
CONT-03m_m67_003	CONT	32	3754.69	0.875131	352.49	10.6519	104.107
CONT-03m_m67_003	CONT	52	4285.43	0.893789	352.49	12.1576	104.107
CONT-03m_m67_003	CONT	16	3618.4	1.14904	352.49	10.2652	104.107
CONT-03m_m67_003	CONT	20	3876.98	0.731185	352.49	10.9988	104.107
CONT-03m_m67_003	CONT	28	3544.71	1.23512	352.49	10.0562	104.107
CONT-03m_m67_003	CONT	48	3988.1	1.04811	352.49	11.3141	104.107
CONT-03m_m67_003	CONT	16	3694.58	0.81421	352.49	10.4814	104.107
CONT-03m_m67_003	CONT	88	5493.05	1.10287	352.49	15.5836	104.107
CONT-03m_m67_003	CONT	40	4034.31	0.74155	352.49	11.4452	104.107
CONT-03m_m67_003	CONT	60	4028.54	1.07462	352.49	11.4288	104.107
CONT-03m_m67_003	CONT	68	5381.13	0.89378	352.49	15.266	104.107
CONT-03m_m67_003	CONT	24	3579.05	0.797855	352.49	10.1536	104.107
CONT-03m_m67_003	CONT	36	3123.98	0.628	352.49	8.8626	104.107
CONT-03m_m67_003	CONT	76	7087.28	0.862332	352.49	20.1063	104.107
CONT-03m_m67_003	CONT	16	3531.37	0.230834	352.49	10.0183	104.107
CONT-03m_m67_003	CONT	80	4087.27	0.951269	352.49	11.5954	104.107
CONT-03m_m67_003	CONT	44	5082.24	0.794974	352.49	14.4181	104.107
CONT-03m_m67_003	CONT	40	4588.72	0.766747	352.49	13.018	104.107
CONT-03m_m67_003	CONT	20	3094.46	0.458247	352.49	8.77886	104.107
CONT-03m_m67_003	CONT	16	3178.93	0.491023	352.49	9.01848	104.107
CONT-03m_m67_003	CONT	40	3993.62	0.634368	352.49	11.3297	104.107
CONT-03m_m67_003	CONT	24	3644.45	0.475948	352.49	10.3391	104.107
CONT-03m_m67_003	CONT	20	4433.53	0.320557	352.49	12.5777	104.107
CONT-03m_m67_003	CONT	28	5796.88	0.503381	352.49	16.4455	104.107
CONT-03m_m67_003	CONT	72	8022.85	0.924621	352.49	22.7605	104.107
CONT-03m_m67_003	CONT	24	3862.49	0.440211	352.49	10.9577	104.107
CONT-03m_m67_003	CONT	16	3795.47	0.153882	352.49	10.7676	104.107
CONT-03m_m67_003	CONT	92	5096.3	1.42592	352.49	14.458	104.107
CONT-03m_m67_003	CONT	24	4839.41	0.890204	352.49	13.7292	104.107
CONT-03m_m67_003	CONT	60	4112.22	0.900701	352.49	11.6662	104.107
CONT-03m_m67_003	CONT	16	4036.69	0.469592	352.49	11.4519	104.107
CONT-03m_m67_003	CONT	56	4268.88	0.808932	352.49	12.1106	104.107
CONT-03m_m67_003	CONT	100	4685.3	0.766313	352.49	13.292	104.107
CONT-03m_m67_003	CONT	36	3518.01	0.686576	352.49	9.98044	104.107
CONT-03m_m67_003	CONT	36	3725.95	0.731932	352.49	10.5704	104.107
CONT-03m_m67_003	CONT	32	3802.82	0.784888	352.49	10.7884	104.107
CONT-03m_m67_003	CONT	72	4959.98	0.822993	352.49	14.0712	104.107
CONT-03m_m67_003	CONT	36	4505.41	1.45715	352.49	12.7816	104.107
CONT-03m_m67_003	CONT	44	5465.81	0.622291	352.49	15.5063	104.107
CONT-03m_m67_003	CONT	76	10947.5	1.24144	352.49	31.0577	104.107
CONT-03m_m67_003	CONT	24	3538.86	0.546273	352.49	10.0396	104.107
CONT-03m_m67_003	CONT	16	3820.13	0.38323	352.49	10.8376	104.107
CONT-03m_m67_003	CONT	88	7054.4	1.01875	352.49	20.013	104.107
CONT-03m_m67_003	CONT	24	3785.19	1.0045	352.49	10.7384	104.107
CONT-03m_m67_003	CONT	360	6365.34	1.42017	352.49	18.0582	104.107
CONT-03m_m67_003	CONT	28	2919.03	0.711333	352.49	8.28116	104.107
CONT-03m_m67_003	CONT	48	2936.48	0.604157	352.49	8.33066	104.107
CONT-03m_m67_003	CONT	40	4751.9	0.795049	352.49	13.4809	104.107
CONT-03m_m67_003	CONT	28	5310.87	0.505225	352.49	15.0667	104.107
CONT-03m_m67_003	CONT	52	4721.54	1.04851	352.49	13.3948	104.107
CONT-03m_m67_003	CONT	20	4740.29	0.42965	352.49	13.448	104.107
CONT-03m_m67_003	CONT	24	3660.57	0.567462	352.49	10.3849	104.107
CONT-03m_m67_003	CONT	28	6059.8	0.771289	352.49	17.1914	104.107
CONT-03m_m67_003	CONT	16	4430.17	0.727657	352.49	12.5682	104.107
CONT-03m_m67_003	CONT	40	4316.27	0.925114	352.49	12.2451	104.107
CONT-03m_m67_003	CONT	328	14026.6	0.988113	352.49	39.7929	104.107
CONT-03m_m67_003	CONT	16	3283.14	0.217776	352.49	9.31411	104.107
CONT-03m_m67_003	CONT	60	7439.82	0.781855	352.49	21.1065	104.107
CONT-03m_m67_003	CONT	28	3262.13	0.270271	352.49	9.25451	104.107
CONT-03m_m67_003	CONT	16	4346.14	0.670768	352.49	12.3298	104.107
CONT-03m_m67_003	CONT	40	3318.63	0.626062	352.49	9.4148	104.107
CONT-03m_m67_003	CONT	28	3266.01	0.677823	352.49	9.26553	104.107
CONT-03m_m67_003	CONT	16	5030.03	0.440563	352.49	14.27	104.107
CONT-03m_m67_003	CONT	28	3869.63	0.73946	352.49	10.978	104.107
CONT-03m_m67_003	CONT	28	6080.11	0.562436	352.49	17.249	104.107
CONT-03m_m67_003	CONT	64	4089.26	0.981541	352.49	11.601	104.107
CONT-03m_m67_003	CONT	16	4163.51	0.255764	352.49	11.8117	104.107
CONT-04m_m67_001	CONT	52	5983.35	0.861631	426.806	14.0189	24.5867
CONT-04m_m67_001	CONT	24	6421.37	0.933815	426.806	15.0452	24.5867
CONT-04m_m67_001	CONT	24	4717.39	0.592627	426.806	11.0528	24.5867
CONT-04m_m67_001	CONT	16	4274.05	0.374821	426.806	10.014	24.5867
CONT-04m_m67_001	CONT	36	5351.88	0.618232	426.806	12.5394	24.5867
CONT-04m_m67_001	CONT	92	7100.85	1.16643	426.806	16.6372	24.5867
CONT-04m_m67_001	CONT	16	4222.05	0.51502	426.806	9.89218	24.5867
CONT-04m_m67_001	CONT	28	6123.48	0.678225	426.806	14.3472	24.5867
CONT-04m_m67_001	CONT	16	3427.23	0.628441	426.806	8.02994	24.5867
CONT-04m_m67_001	CONT	76	6415.01	1.07033	426.806	15.0303	24.5867
CONT-04m_m67_001	CONT	20	4232.36	0.431096	426.806	9.91635	24.5867
CONT-04m_m67_001	CONT	116	8388.79	1.07853	426.806	19.6548	24.5867
CONT-04m_m67_001	CONT	20	5250.95	0.451776	426.806	12.3029	24.5867
CONT-04m_m67_001	CONT	16	5076.12	0.606065	426.806	11.8933	24.5867
CONT-04m_m67_001	CONT	28	6737.38	0.651554	426.806	15.7856	24.5867
CONT-04m_m67_001	CONT	40	7084.73	0.846091	426.806	16.5994	24.5867
CONT-04m_m67_001	CONT	20	4618.69	0.291471	426.806	10.8215	24.5867
CONT-04m_m67_001	CONT	20	3813.43	0.492875	426.806	8.93481	24.5867
CONT-04m_m67_001	CONT	40	5475.67	0.580187	426.806	12.8294	24.5867
CONT-04m_m67_001	CONT	36	4044.34	0.614464	426.806	9.47583	24.5867
CONT-04m_m67_001	CONT	32	6443.84	0.851071	426.806	15.0978	24.5867
CONT-04m_m67_002	CONT	96	20343.3	1.26476	705.829	28.8219	63.9822
CONT-04m_m67_002	CONT	16	6375.05	0.231513	705.829	9.03201	63.9822
CONT-04m_m67_002	CONT	44	6800.21	0.695755	705.829	9.63436	63.9822
CONT-04m_m67_002	CONT	16	7024.5	0.211236	705.829	9.95212	63.9822
CONT-04m_m67_002	CONT	40	6769.54	0.528515	705.829	9.59091	63.9822
CONT-04m_m67_002	CONT	16	6785.96	0.293089	705.829	9.61417	63.9822
CONT-04m_m67_002	CONT	24	6400.47	0.475827	705.829	9.06801	63.9822
CONT-04m_m67_002	CONT	48	9214.12	0.668116	705.829	13.0543	63.9822
CONT-04m_m67_002	CONT	52	9919.34	0.499089	705.829	14.0535	63.9822
CONT-04m_m67_002	CONT	44	8412.39	0.534996	705.829	11.9185	63.9822
CONT-04m_m67_002	CONT	80	8649.83	0.662138	705.829	12.2549	63.9822
CONT-04m_m67_002	CONT	20	6708.22	0.319468	705.829	9.50403	63.9822
CONT-04m_m67_002	CONT	52	8740.23	0.922381	705.829	12.3829	63.9822
CONT-04m_m67_002	CONT	16	6056.75	0.342937	705.829	8.58105	63.9822
CONT-04m_m67_002	CONT	128	8831.02	0.774118	705.829	12.5116	63.9822
CONT-04m_m67_002	CONT	32	6650.71	0.497634	705.829	9.42255	63.9822
CONT-04m_m67_002	CONT	28	6355.46	0.372825	705.829	9.00425	63.9822
CONT-04m_m67_002	CONT	44	8986.35	1.1227	705.829	12.7316	63.9822
CONT-04m_m67_002	CONT	84	10117.6	1.07285	705.829	14.3344	63.9822
CONT-04m_m67_002	CONT	64	11616.9	1.04837	705.829	16.4585	63.9822
CONT-04m_m67_002	CONT	120	13106.3	0.728513	705.829	18.5687	63.9822
CONT-04m_m67_002	CONT	20	7525.61	0.484266	705.829	10.6621	63.9822
CONT-04m_m67_002	CONT	16	6254.91	0.406897	705.829	8.86179	63.9822
CONT-04m_m67_002	CONT	20	6467.44	0.389709	705.829	9.1629	63.9822
CONT-04m_m67_002	CONT	32	10123.3	0.480983	705.829	14.3424	63.9822
CONT-04m_m67_002	CONT	24	7795.72	0.267448	705.829	11.0448	63.9822
CONT-04m_m67_002	CONT	28	5974.77	0.57158	705.829	8.46489	63.9822
CONT-04m_m67_002	CONT	92	9599.57	1.08568	705.829	13.6004	63.9822
CONT-04m_m67_002	CONT	32	5787.14	0.380014	705.829	8.19907	63.9822
CONT-04m_m67_002	CONT	36	8659.78	0.79429	705.829	12.269	63.9822
CONT-04m_m67_002	CONT	20	7025.37	0.695015	705.829	9.95336	63.9822
CONT-04m_m67_002	CONT	32	9179.93	0.963824	705.829	13.0059	63.9822
CONT-04m_m67_002	CONT	48	9609.72	0.943069	705.829	13.6148	63.9822
CONT-04m_m67_002	CONT	20	6116.86	0.414587	705.829	8.6662	63.9822
CONT-04m_m67_002	CONT	44	14341.5	1.2774	705.829	20.3186	63.9822
CONT-04m_m67_002	CONT	40	10716.9	0.505092	705.829	15.1834	63.9822
CONT-04m_m67_002	CONT	20	5737.59	0.609552	705.829	8.12886	63.9822
CONT-04m_m67_002	CONT	28	6078.98	0.419505	705.829	8.61254	63.9822
CONT-04m_m67_002	CONT	24	10178.8	0.576419	705.829	14.4211	63.9822
CONT-04m_m67_002	CONT	24	8054.37	0.684217	705.829	11.4112	63.9822
CONT-04m_m67_002	CONT	16	8502.25	0.566762	705.829	12.0458	63.9822
CONT-04m_m67_002	CONT	28	6265.03	0.824501	705.829	8.87613	63.9822
CONT-04m_m67_002	CONT	24	9753.12	0.836763	705.829	13.818	63.9822
CONT-04m_m67_002	CONT	20	10558.8	0.702629	705.829	14.9594	63.9822
CONT-04m_m67_002	CONT	20	6941.03	0.47658	705.829	9.83387	63.9822
CONT-04m_m67_002	CONT	28	6552.14	0.479369	705.829	9.2829	63.9822
CONT-04m_m67_002	CONT	88	8336.36	0.925119	705.829	11.8107	63.9822
CONT-05m_m67_001	CONT	16	5297.82	0.484855	616.821	8.58891	97.6533
CONT-05m_m67_001	CONT	16	7149.73	0.46558	616.821	11.5912	97.6533
CONT-05m_m67_001	CONT	84	8738.48	0.863618	616.821	14.167	97.6533
CONT-05m_m67_001	CONT	56	5930.5	0.669646	616.821	9.61461	97.6533
CONT-05m_m67_001	CONT	16	6533.95	0.278184	616.821	10.5929	97.6533
CONT-05m_m67_001	CONT	20	6264.74	0.401687	616.821	10.1565	97.6533
CONT-05m_m67_001	CONT	32	5327.82	0.559511	616.821	8.63754	97.6533
CONT-05m_m67_001	CONT	40	7376.4	0.556097	616.821	11.9587	97.6533
CONT-05m_m67_001	CONT	80	8022.68	0.778643	616.821	13.0065	97.6533
CONT-05m_m67_001	CONT	24	6725.67	0.58847	616.821	10.9038	97.6533
CONT-05m_m67_001	CONT	20	5571.5	0.317867	616.821	9.0326	97.6533
CONT-05m_m67_001	CONT	84	11915.3	1.33276	616.821	19.3173	97.6533
CONT-05m_m67_001	CONT	24	5746.67	0.669669	616.821	9.31659	97.6533
CONT-05m_m67_001	CONT	28	6650.4	0.703292	616.821	10.7817	97.6533
CONT-05m_m67_001	CONT	56	7574.95	0.877172	616.821	12.2806	97.6533
CONT-05m_m67_001	CONT	56	6526.04	0.713136	616.821	10.5801	97.6533
CONT-05m_m67_001	CONT	20	6166.97	0.300899	616.821	9.99799	97.6533
CONT-05m_m67_001	CONT	120	10947.5	1.19115	616.821	17.7483	97.6533
CONT-05m_m67_001	CONT	52	6808.94	0.786443	616.821	11.0388	97.6533
CONT-05m_m67_001	CONT	232	13081.8	2.10206	616.821	21.2084	97.6533
CONT-05m_m67_001	CONT	20	4908.17	0.149278	616.821	7.9572	97.6533
CONT-05m_m67_001	CONT	20	5899.15	0.587977	616.821	9.5638	97.6533
CONT-05m_m67_001	CONT	16	5601.92	0.509792	616.821	9.08191	97.6533
CONT-05m_m67_001	CONT	28	5200.13	0.25964	616.821	8.43052	97.6533
CONT-05m_m67_001	CONT	28	7239.45	0.580826	616.821	11.7367	97.6533
CONT-05m_m67_001	CONT	36	6461.02	0.864805	616.821	10.4747	97.6533
CONT-05m_m67_001	CONT	20	5467.03	0.406427	616.821	8.86324	97.6533
CONT-05m_m67_001	CONT	20	6568.69	0.495213	616.821	10.6493	97.6533
CONT-05m_m67_001	CONT	156	12601.7	0.946995	616.821	20.4301	97.6533
CONT-05m_m67_001	CONT	52	8019.88	0.916765	616.821	13.0019	97.6533
CONT-05m_m67_001	CONT	36	7013.47	0.831589	616.821	11.3703	97.6533
CONT-05m_m67_001	CONT	32	5593.64	1.24532	616.821	9.0685	97.6533
CONT-05m_m67_001	CONT	16	4841.62	0.258962	616.821	7.84931	97.6533
CONT-05m_m67_001	CONT	88	7260.49	0.98699	616.821	11.7708	97.6533
CONT-05m_m67_001	CONT	16	5843.38	0.368185	616.821	9.47337	97.6533
CONT-05m_m67_001	CONT	36	5619.47	0.479793	616.821	9.11038	97.6533
CONT-05m_m67_001	CONT	116	9107.77	0.81739	616.821	14.7657	97.6533
CONT-05m_m67_001	CONT	56	6654.58	0.495222	616.821	10.7885	97.6533
CONT-05m_m67_001	CONT	44	6838.78	0.494201	616.821	11.0871	97.6533
CONT-05m_m67_001	CONT	24	5762	0.575886	616.821	9.34144	97.6533
CONT-05m_m67_001	CONT	24	4691.62	0.345356	616.821	7.60612	97.6533
CONT-05m_m67_001	CONT	20	6017.24	0.682544	616.821	9.75525	97.6533
CONT-05m_m67_001	CONT	68	5868.39	0.641163	616.821	9.51393	97.6533
CONT-05m_m67_001	CONT	16	5849.65	0.121678	616.821	9.48355	97.6533
CONT-05m_m67_001	CONT	24	5018.07	0.326137	616.821	8.13536	97.6533
CONT-05m_m67_001	CONT	20	5851.66	1.31531	616.821	9.4868	97.6533
CONT-05m_m67_001	CONT	16	5957.33	0.234324	616.821	9.65812	97.6533
CONT-05m_m67_001	CONT	20	6575.56	0.287118	616.821	10.6604	97.6533
CONT-05m_m67_001	CONT	16	5721.72	0.342998	616.821	9.27615	97.6533
CONT-05m_m67_001	CONT	16	5134.16	0.323998	616.821	8.32358	97.6533
CONT-05m_m67_001	CONT	20	5939.34	0.510078	616.821	9.62895	97.6533
CONT-05m_m67_001	CONT	28	5716.46	0.558001	616.821	9.26761	97.6533
CONT-05m_m67_001	CONT	16	6071.72	0.493612	616.821	9.84357	97.6533
CONT-05m_m67_001	CONT	16	6179.92	0.376961	616.821	10.019	97.6533
CONT-05m_m67_001	CONT	56	7219.46	0.929437	616.821	11.7043	97.6533
CONT-05m_m67_001	CONT	48	7146.72	0.795038	616.821	11.5864	97.6533
CONT-05m_m67_001	CONT	56	8462.58	0.702399	616.821	13.7197	97.6533
CONT-05m_m67_001	CONT	44	7340.37	1.12736	616.821	11.9003	97.6533
CONT-05m_m67_001	CONT	68	8963.21	0.871227	616.821	14.5313	97.6533
CONT-05m_m67_001	CONT	16	4895.9	0.354566	616.821	7.9373	97.6533
CONT-05m_m67_001	CONT	48	11925.2	0.97296	616.821	19.3332	97.6533
CONT-05m_m67_001	CONT	28	5519.38	0.701673	616.821	8.94811	97.6533
CONT-05m_m67_001	CONT	36	6083.85	0.78991	616.821	9.86322	97.6533
CONT-05m_m67_001	CONT	32	6353.17	0.658706	616.821	10.2998	97.6533
CONT-05m_m67_001	CONT	16	5760.6	0.466623	616.821	9.33917	97.6533
CONT-05m_m67_001	CONT	20	6838.44	0.684373	616.821	11.0866	97.6533
CONT-05m_m67_001	CONT	84	6382.06	1.07953	616.821	10.3467	97.6533
CONT-05m_m67_002	CONT	56	5750.28	1.03103	499.084	11.5217	33.4044
CONT-05m_m67_002	CONT	32	5721.1	0.785304	499.084	11.4632	33.4044
CONT-05m_m67_002	CONT	32	7733.79	1.00984	499.084	15.496	33.4044
CONT-05m_m67_002	CONT	40	5990.65	0.673199	499.084	12.0033	33.4044
CONT-05m_m67_002	CONT	20	4503.18	0.805183	499.084	9.02289	33.4044
CONT-05m_m67_002	CONT	56	7876.92	0.771022	499.084	15.7827	33.4044
CONT-05m_m67_002	CONT	100	9067.01	1.05224	499.084	18.1673	33.4044
CONT-05m_m67_002	CONT	48	10719	0.810415	499.084	21.4774	33.4044
CONT-05m_m67_002	CONT	48	8385.81	0.418907	499.084	16.8024	33.4044
CONT-05m_m67_002	CONT	44	6151.28	0.600063	499.084	12.3251	33.4044
CONT-05m_m67_002	CONT	20	7704.13	0.526938	499.084	15.4365	33.4044
CONT-05m_m67_002	CONT	48	5537.25	0.625919	499.084	11.0948	33.4044
CONT-05m_m67_002	CONT	40	5971.9	0.729687	499.084	11.9657	33.4044
CONT-05m_m67_002	CONT	16	4874.47	0.219887	499.084	9.76683	33.4044
CONT-05m_m67_002	CONT	144	14910.6	2.03204	499.084	29.876	33.4044
CONT-05m_m67_002	CONT	44	7918.76	0.635231	499.084	15.8666	33.4044
CONT-05m_m67_002	CONT	40	7537.11	0.817238	499.084	15.1019	33.4044
CONT-05m_m67_002	CONT	40	6828.56	0.714748	499.084	13.6822	33.4044
CONT-05m_m67_002	CONT	64	6848.26	0.760601	499.084	13.7217	33.4044
CONT-05m_m67_002	CONT	92	8590.66	0.829114	499.084	17.2129	33.4044
CONT-05m_m67_002	CONT	28	6448.8	0.642553	499.084	12.9213	33.4044
CONT-05m_m67_002	CONT	20	8621.76	0.343878	499.084	17.2752	33.4044
CONT-05m_m67_002	CONT	16	4937.91	0.376127	499.084	9.89394	33.4044
CONT-05m_m67_002	CONT	32	7431.03	0.798568	499.084	14.8893	33.4044
CONT-05m_m67_002	CONT	24	7033.42	0.460317	499.084	14.0927	33.4044
CONT-05m_m67_002	CONT	16	7363.07	0.455748	499.084	14.7532	33.4044
CONT-05m_m67_002	CONT	16	6723.45	0.403391	499.084	13.4716	33.4044
CONT-05m_m67_002	CONT	28	4864.32	0.904455	499.084	9.74649	33.4044
CONT-05m_m67_002	CONT	40	7159.81	0.659764	499.084	14.3459	33.4044
CONT-05m_m67_002	CONT	16	5515.89	0.105134	499.084	11.052	33.4044
CONT-06m_m67_002	CONT	332	12304.7	1.4524	645.282	19.0687	25.2978
CONT-06m_m67_002	CONT	84	10751.1	0.925258	645.282	16.6612	25.2978
CONT-06m_m67_002	CONT	112	11027.9	1.16171	645.282	17.09	25.2978
CONT-06m_m67_002	CONT	40	8909.49	0.883259	645.282	13.8071	25.2978
CONT-06m_m67_002	CONT	40	6952.76	0.717741	645.282	10.7748	25.2978
CONT-06m_m67_002	CONT	20	5955.67	0.332015	645.282	9.22956	25.2978
CONT-06m_m67_002	CONT	100	17219.5	0.944674	645.282	26.6852	25.2978
CONT-06m_m67_002	CONT	92	10205	1.46768	645.282	15.8148	25.2978
CONT-06m_m67_002	CONT	16	6366.45	0.281889	645.282	9.86616	25.2978
CONT-06m_m67_002	CONT	64	7196.81	0.722487	645.282	11.153	25.2978
CONT-06m_m67_002	CONT	36	7829.31	0.657224	645.282	12.1332	25.2978
CONT-06m_m67_002	CONT	32	2411.23	1.43225	645.282	3.73672	25.2978
CONT-06m_m67_002	CONT	36	2658.15	1.80022	645.282	4.11936	25.2978
CONT-06m_m67_002	CONT	20	6808.65	0.437006	645.282	10.5514	25.2978
CONT-06m_m67_002	CONT	92	9293.24	0.868656	645.282	14.4018	25.2978
CONT-06m_m67_002	CONT	16	6658.23	0.477638	645.282	10.3183	25.2978
CONT-06m_m67_002	CONT	20	7398.47	0.342491	645.282	11.4655	25.2978
CONT-06m_m67_002	CONT	120	14390.1	1.134	645.282	22.3005	25.2978
CONT-06m_m67_002	CONT	32	5621.67	0.555326	645.282	8.71196	25.2978
CONT-06m_m67_002	CONT	28	6176.62	0.643004	645.282	9.57197	25.2978
CONT-06m_m67_002	CONT	20	6479.11	0.444533	645.282	10.0408	25.2978
CONT-06m_m67_003	CONT	56	8994.29	0.698913	660.533	13.6167	19.2889
CONT-06m_m67_003	CONT	120	10376	1.15312	660.533	15.7085	19.2889
CONT-06m_m67_003	CONT	52	10590.8	0.486253	660.533	16.0337	19.2889
CONT-06m_m67_003	CONT	16	9488.27	0.278311	660.533	14.3646	19.2889
CONT-06m_m67_003	CONT	80	10749.4	0.826033	660.533	16.2739	19.2889
CONT-06m_m67_003	CONT	64	11676.7	0.969631	660.533	17.6776	19.2889
CONT-06m_m67_003	CONT	24	8526.35	0.236111	660.533	12.9083	19.2889
CONT-06m_m67_003	CONT	16	9236.32	0.302812	660.533	13.9831	19.2889
CONT-06m_m67_003	CONT	28	10094.1	0.401476	660.533	15.2818	19.2889
CONT-06m_m67_003	CONT	16	7807.07	0.337232	660.533	11.8193	19.2889
CONT-06m_m67_003	CONT	60	7173.75	0.585136	660.533	10.8606	19.2889
CONT-06m_m67_003	CONT	60	7040.97	0.834543	660.533	10.6595	19.2889
CONT-06m_m67_003	CONT	24	6548.86	0.770729	660.533	9.91452	19.2889
CONT-06m_m67_003	CONT	32	7138.42	0.515917	660.533	10.8071	19.2889
CONT-06m_m67_003	CONT	100	7487.01	0.722522	660.533	11.3348	19.2889
CONT-06m_m67_003	CONT	184	9620.02	0.852948	660.533	14.564	19.2889
WASp-01m_m67_001	WASp	36	8259.12	0.66058	825.768	10.0017	8.21333
WASp-01m_m67_001	WASp	16	7456.01	0.272527	825.768	9.02918	8.21333
WASp-01m_m67_001	WASp	16	7889.79	0.382572	825.768	9.55448	8.21333
WASp-01m_m67_002	WASp	356	9885.16	0.990363	757.928	13.0423	13.8667
WASp-01m_m67_002	WASp	36	7409.57	0.457564	757.928	9.77608	13.8667
WASp-01m_m67_002	WASp	24	6915.39	0.633771	757.928	9.12407	13.8667
WASp-01m_m67_003	WASp	76	19584	0.969546	768.583	25.4806	20.64
WASp-01m_m67_003	WASp	32	9373.61	0.80164	768.583	12.196	20.64
WASp-01m_m67_003	WASp	20	6890.6	0.240298	768.583	8.96533	20.64
WASp-01m_m67_003	WASp	128	13720.7	0.883781	768.583	17.852	20.64
WASp-01m_m67_003	WASp	28	7837.37	0.22089	768.583	10.1972	20.64
WASp-01m_m67_003	WASp	52	11319.6	0.706979	768.583	14.7279	20.64
WASp-01m_m67_003	WASp	28	9513.04	0.590292	768.583	12.3774	20.64
WASp-01m_m67_003	WASp	32	8887.7	0.516514	768.583	11.5637	20.64
WASp-01m_m67_003	WASp	28	9900.18	0.513183	768.583	12.8811	20.64
WASp-01m_m67_003	WASp	28	7499.65	0.570808	768.583	9.75777	20.64
WASp-01m_m67_003	WASp	64	8622.39	0.681927	768.583	11.2185	20.64
WASp-01m_m67_003	WASp	52	8016.9	0.448986	768.583	10.4307	20.64
WASp-01m_m67_003	WASp	32	9295.78	0.492093	768.583	12.0947	20.64
WASp-02m_m67_001	WASp	16	8679.61	0.498661	878.765	9.87705	57.0844
WASp-02m_m67_001	WASp	36	9205.19	0.583056	878.765	10.4751	57.0844
WASp-02m_m67_001	WASp	20	14834.9	0.454021	878.765	16.8816	57.0844
WASp-02m_m67_001	WASp	28	12531.5	0.297016	878.765	14.2604	57.0844
WASp-02m_m67_001	WASp	64	14179.6	0.414529	878.765	16.1359	57.0844
WASp-02m_m67_001	WASp	20	10850.2	0.183423	878.765	12.347	57.0844
WASp-02m_m67_001	WASp	56	13401.8	0.589844	878.765	15.2507	57.0844
WASp-02m_m67_001	WASp	24	13778	0.349199	878.765	15.6788	57.0844
WASp-02m_m67_001	WASp	16	17730.5	0.294043	878.765	20.1766	57.0844
WASp-02m_m67_001	WASp	20	15930	0.346319	878.765	18.1277	57.0844
WASp-02m_m67_001	WASp	140	15952.9	0.974639	878.765	18.1538	57.0844
WASp-02m_m67_001	WASp	28	12586.2	0.334403	878.765	14.3226	57.0844
WASp-02m_m67_001	WASp	16	14737.3	0.223532	878.765	16.7705	57.0844
WASp-02m_m67_001	WASp	36	9329.62	0.448271	878.765	10.6167	57.0844
WASp-02m_m67_001	WASp	100	9935.1	0.713432	878.765	11.3058	57.0844
WASp-02m_m67_001	WASp	28	8684.12	0.347719	878.765	9.88218	57.0844
WASp-02m_m67_001	WASp	20	10098.5	0.419511	878.765	11.4917	57.0844
WASp-02m_m67_001	WASp	64	10857.7	0.62533	878.765	12.3556	57.0844
WASp-02m_m67_002	WASp	64	13177.3	0.83425	1054.14	12.5005	22.7733
WASp-02m_m67_002	WASp	20	12936.6	0.511998	1054.14	12.2722	22.7733
WASp-02m_m67_002	WASp	28	17464.7	0.334295	1054.14	16.5677	22.7733
WASp-02m_m67_002	WASp	16	12584.6	0.227897	1054.14	11.9382	22.7733
WASp-02m_m67_002	WASp	20	13994.7	0.233006	1054.14	13.2759	22.7733
WASp-02m_m67_002	WASp	28	14099.2	0.485831	1054.14	13.3751	22.7733
WASp-02m_m67_002	WASp	24	11292.6	0.45752	1054.14	10.7126	22.7733
WASp-02m_m67_002	WASp	52	11420.6	0.732697	1054.14	10.834	22.7733
WASp-02m_m67_002	WASp	64	12986.4	0.753472	1054.14	12.3194	22.7733
WASp-02m_m67_002	WASp	16	11622.7	0.339578	1054.14	11.0257	22.7733
WASp-02m_m67_002	WASp	44	11249.4	0.407347	1054.14	10.6716	22.7733
WASp-02m_m67_003	WASp	44	18589.4	0.346146	1511.97	12.2948	26.4533
WASp-02m_m67_003	WASp	20	16803.3	0.129608	1511.97	11.1135	26.4533
WASp-02m_m67_003	WASp	20	17378.9	0.602503	1511.97	11.4942	26.4533
WASp-02m_m67_003	WASp	16	17308.4	0.214996	1511.97	11.4476	26.4533
WASp-02m_m67_003	WASp	28	15892.4	0.370637	1511.97	10.511	26.4533
WASp-02m_m67_003	WASp	28	18149.1	0.489162	1511.97	12.0036	26.4533
WASp-02m_m67_003	WASp	16	18037.9	0.205531	1511.97	11.93	26.4533
WASP-03f_m67_001	WASP	20	11078.7	0.267917	1140.29	9.71568	43.7867
WASP-03f_m67_001	WASP	72	13994.2	0.742998	1140.29	12.2725	43.7867
WASP-03f_m67_001	WASP	20	12585	0.373915	1140.29	11.0367	43.7867
WASP-03f_m67_001	WASP	136	19897.9	0.627683	1140.29	17.4499	43.7867
WASP-03f_m67_001	WASP	20	12229.6	0.390201	1140.29	10.725	43.7867
WASP-03f_m67_001	WASP	260	25698	0.983763	1140.29	22.5364	43.7867
WASP-03f_m67_001	WASP	64	11915.7	0.547675	1140.29	10.4497	43.7867
WASP-03f_m67_001	WASP	16	15143.7	0.370319	1140.29	13.2806	43.7867
WASP-03f_m67_001	WASP	32	17957.2	0.220324	1140.29	15.748	43.7867
WASP-03f_m67_001	WASP	156	15361.2	0.870877	1140.29	13.4713	43.7867
WASP-03f_m67_001	WASP	84	20171.2	1.10111	1140.29	17.6896	43.7867
WASP-03f_m67_001	WASP	72	15711	0.355398	1140.29	13.7781	43.7867
WASP-03f_m67_001	WASP	56	14085.2	0.450891	1140.29	12.3523	43.7867
WASP-03f_m67_001	WASP	60	27817.8	0.722276	1140.29	24.3954	43.7867
WASP-03f_m67_001	WASP	20	14821.5	0.377665	1140.29	12.9981	43.7867
WASP-03f_m67_001	WASP	24	15187.9	0.729014	1140.29	13.3193	43.7867
WASP-03f_m67_001	WASP	16	14031.2	0.422316	1140.29	12.305	43.7867
WASP-03f_m67_001	WASP	240	24071.1	1.38181	1140.29	21.1096	43.7867
WASP-03f_m67_001	WASP	224	19950	1.42985	1140.29	17.4956	43.7867
WASP-03f_m67_001	WASP	40	14256.4	0.774337	1140.29	12.5025	43.7867
WASP-03f_m67_002	WASP	356	20636.1	1.11421	1251.04	16.4952	56.5689
WASP-03f_m67_002	WASP	48	13216.9	0.565742	1251.04	10.5647	56.5689
WASP-03f_m67_002	WASP	44	16677.5	0.714781	1251.04	13.3309	56.5689
WASP-03f_m67_002	WASP	28	13727.2	0.503199	1251.04	10.9726	56.5689
WASP-03f_m67_002	WASP	16	10876.4	0.323321	1251.04	8.69391	56.5689
WASP-03f_m67_002	WASP	24	12404.2	0.382472	1251.04	9.91513	56.5689
WASP-03f_m67_002	WASP	104	20986.7	1.11347	1251.04	16.7754	56.5689
WASP-03f_m67_002	WASP	28	12498	0.457122	1251.04	9.99008	56.5689
WASP-03f_m67_002	WASP	16	14645.6	0.196572	1251.04	11.7067	56.5689
WASP-03f_m67_002	WASP	40	11965.8	0.419613	1251.04	9.56465	56.5689
WASP-03f_m67_002	WASP	68	17404.3	0.803606	1251.04	13.9119	56.5689
WASP-03f_m67_002	WASP	16	11162.3	0.162537	1251.04	8.92237	56.5689
WASP-03f_m67_002	WASP	204	23715.9	0.851007	1251.04	18.9569	56.5689
WASP-03f_m67_002	WASP	20	12007.7	0.573167	1251.04	9.59812	56.5689
WASP-03f_m67_002	WASP	24	14655.4	0.569257	1251.04	11.7146	56.5689
WASP-03f_m67_002	WASP	84	26038.1	1.40164	1251.04	20.8131	56.5689
WASP-03f_m67_002	WASP	28	12558	0.320181	1251.04	10.038	56.5689
WASP-03f_m67_002	WASP	32	13753	0.438701	1251.04	10.9933	56.5689
WASP-03f_m67_002	WASP	24	13908.7	0.337193	1251.04	11.1177	56.5689
WASP-03f_m67_002	WASP	88	18745.6	0.687946	1251.04	14.984	56.5689
WASP-03f_m67_002	WASP	24	10343	0.43848	1251.04	8.2675	56.5689
WASP-03f_m67_002	WASP	40	13783.3	0.457128	1251.04	11.0174	56.5689
WASP-03f_m67_002	WASP	100	23457.8	0.916301	1251.04	18.7506	56.5689
WASP-03f_m67_002	WASP	68	14610	0.553726	1251.04	11.6783	56.5689
WASP-03f_m67_002	WASP	56	16379.7	0.518088	1251.04	13.0928	56.5689
WASP-03f_m67_002	WASP	48	14599.9	0.545112	1251.04	11.6702	56.5689
WASP-03f_m67_002	WASP	48	14987.7	0.75054	1251.04	11.9802	56.5689
WASP-03f_m67_002	WASP	60	24033	0.993657	1251.04	19.2104	56.5689
WASP-03f_m67_002	WASP	16	13867.3	0.161783	1251.04	11.0846	56.5689
WASP-03f_m67_002	WASP	24	14979.5	0.186178	1251.04	11.9736	56.5689
WASP-03f_m67_002	WASP	24	13512.5	0.306809	1251.04	10.801	56.5689
WASP-03f_m67_002	WASP	56	15066.4	0.529951	1251.04	12.0431	56.5689
WASP-03f_m67_002	WASP	16	14106.7	0.303856	1251.04	11.276	56.5689
WASP-03f_m67_002	WASP	104	24079.8	1.03284	1251.04	19.2478	56.5689
WASP-03f_m67_002	WASP	24	14110.7	0.202185	1251.04	11.2792	56.5689
WASP-03f_m67_002	WASP	100	18643.5	0.638454	1251.04	14.9024	56.5689
WASP-03f_m67_002	WASP	84	18518.7	0.714497	1251.04	14.8026	56.5689
WASP-03f_m67_002	WASP	24	15703.3	0.291408	1251.04	12.5522	56.5689
WASP-03f_m67_002	WASP	52	22148.8	0.737685	1251.04	17.7043	56.5689
WASP-03f_m67_002	WASP	16	15618	0.359686	1251.04	12.484	56.5689
WASP-03f_m67_002	WASP	28	17688.2	0.554075	1251.04	14.1388	56.5689
WASP-03f_m67_002	WASP	64	19121.8	0.489584	1251.04	15.2847	56.5689
WASP-03f_m67_002	WASP	252	20162.6	1.11708	1251.04	16.1166	56.5689
WASP-03f_m67_002	WASP	160	22786.5	0.940762	1251.04	18.214	56.5689
WASP-03f_m67_002	WASP	344	26682.5	1.04832	1251.04	21.3282	56.5689
WASP-03f_m67_002	WASP	32	13089.4	0.535598	1251.04	10.4628	56.5689
WASP-04m_m67_001	WASP	132	22598.2	1.03932	952.448	23.7265	46.0267
WASP-04m_m67_001	WASP	16	9793.18	0.518638	952.448	10.2821	46.0267
WASP-04m_m67_001	WASP	68	14706	1.18182	952.448	15.4402	46.0267
WASP-04m_m67_001	WASP	32	16456.9	0.95174	952.448	17.2785	46.0267
WASP-04m_m67_001	WASP	88	14112.4	0.736428	952.448	14.817	46.0267
WASP-04m_m67_001	WASP	16	10649.1	0.0504335	952.448	11.1808	46.0267
WASP-04m_m67_001	WASP	16	11656.6	0.352623	952.448	12.2385	46.0267
WASP-04m_m67_001	WASP	44	10485.8	0.499434	952.448	11.0093	46.0267
WASP-04m_m67_001	WASP	36	10640.5	0.616009	952.448	11.1717	46.0267
WASP-04m_m67_001	WASP	20	8954.63	0.515628	952.448	9.4017	46.0267
WASP-04m_m67_001	WASP	108	13178.1	0.809845	952.448	13.836	46.0267
WASP-04m_m67_001	WASP	20	10692.3	0.406994	952.448	11.2262	46.0267
WASP-04m_m67_001	WASP	44	11528.1	1.00181	952.448	12.1036	46.0267
WASP-04m_m67_001	WASP	96	15259.3	0.91331	952.448	16.0212	46.0267
WASP-04m_m67_001	WASP	68	14168.7	0.749557	952.448	14.8761	46.0267
WASP-04m_m67_001	WASP	36	11371.5	0.752249	952.448	11.9393	46.0267
WASP-04m_m67_001	WASP	20	10105.3	0.719312	952.448	10.6098	46.0267
WASP-04m_m67_001	WASP	16	10367.7	0.073658	952.448	10.8854	46.0267
WASP-04m_m67_001	WASP	16	10924.7	0.294644	952.448	11.4701	46.0267
WASP-04m_m67_001	WASP	16	11064.1	0.540708	952.448	11.6164	46.0267
WASP-04m_m67_001	WASP	16	12496.8	0.226251	952.448	13.1207	46.0267
WASP-04m_m67_001	WASP	20	9349.15	0.31247	952.448	9.81592	46.0267
WASP-04m_m67_001	WASP	80	17637.6	0.930097	952.448	18.5181	46.0267
WASP-04m_m67_001	WASP	24	8912.24	0.318111	952.448	9.35719	46.0267
WASP-04m_m67_001	WASP	32	8763.72	0.214164	952.448	9.20126	46.0267
WASP-04m_m67_002	WASP	68	16457.3	0.525825	1350.9	12.1825	47.9111
WASP-04m_m67_002	WASP	36	14337.1	0.603525	1350.9	10.613	47.9111
WASP-04m_m67_002	WASP	20	13333.9	0.286906	1350.9	9.87039	47.9111
WASP-04m_m67_002	WASP	16	12521.5	0.254721	1350.9	9.26905	47.9111
WASP-04m_m67_002	WASP	84	18991.9	0.914923	1350.9	14.0588	47.9111
WASP-04m_m67_002	WASP	84	24768	0.964658	1350.9	18.3345	47.9111
WASP-04m_m67_002	WASP	56	13277.7	0.517579	1350.9	9.82883	47.9111
WASP-04m_m67_002	WASP	24	14387.4	0.326946	1350.9	10.6503	47.9111
WASP-04m_m67_002	WASP	56	16583.2	0.450193	1350.9	12.2757	47.9111
WASP-04m_m67_002	WASP	24	13017.2	0.370946	1350.9	9.63598	47.9111
WASP-04m_m67_002	WASP	192	20409.9	0.782326	1350.9	15.1084	47.9111
WASP-04m_m67_002	WASP	52	13048.8	0.588509	1350.9	9.65933	47.9111
WASP-04m_m67_002	WASP	112	25285.3	0.640411	1350.9	18.7174	47.9111
WASP-04m_m67_002	WASP	176	20023.3	1.24253	1350.9	14.8222	47.9111
WASP-04m_m67_002	WASP	28	14502.3	0.53867	1350.9	10.7353	47.9111
WASP-04m_m67_002	WASP	108	15569.1	0.781725	1350.9	11.525	47.9111
WASP-04m_m67_002	WASP	44	13872.6	0.410356	1350.9	10.2692	47.9111
WASP-04m_m67_002	WASP	36	19410.2	0.609004	1350.9	14.3683	47.9111
WASP-04m_m67_002	WASP	28	15545.8	0.318418	1350.9	11.5077	47.9111
WASP-04m_m67_002	WASP	68	15826	0.742582	1350.9	11.7152	47.9111
WASP-04m_m67_002	WASP	80	15915.3	0.685372	1350.9	11.7812	47.9111
WASP-04m_m67_002	WASP	32	15054.5	0.490072	1350.9	11.1441	47.9111
WASP-04m_m67_002	WASP	344	28609.8	1.38205	1350.9	21.1783	47.9111
WASP-04m_m67_002	WASP	16	13635.6	0.0318931	1350.9	10.0938	47.9111
WASP-04m_m67_002	WASP	32	15785.7	0.678913	1350.9	11.6854	47.9111
WASP-04m_m67_002	WASP	108	28208.2	1.1733	1350.9	20.8811	47.9111
WASP-04m_m67_002	WASP	28	14465.6	0.334631	1350.9	10.7081	47.9111
WASP-04m_m67_002	WASP	112	21392.9	1.0872	1350.9	15.836	47.9111
WASP-04m_m67_002	WASP	28	16014.3	0.465732	1350.9	11.8546	47.9111
WASP-04m_m67_002	WASP	36	13830.3	0.376112	1350.9	10.2378	47.9111
WASP-04m_m67_002	WASP	72	14511.8	0.7776	1350.9	10.7424	47.9111
WASP-04m_m67_003	WASP	40	20903.6	0.699158	1454.44	14.3723	33.0667
WASP-04m_m67_003	WASP	16	14448.2	0.304642	1454.44	9.93387	33.0667
WASP-04m_m67_003	WASP	16	14357.9	0.442745	1454.44	9.87175	33.0667
WASP-04m_m67_003	WASP	56	15542.3	0.631595	1454.44	10.6861	33.0667
WASP-04m_m67_003	WASP	20	14639.8	0.431771	1454.44	10.0656	33.0667
WASP-04m_m67_003	WASP	56	14793.3	0.309625	1454.44	10.1712	33.0667
WASP-04m_m67_003	WASP	16	12879	0.158074	1454.44	8.85495	33.0667
WASP-04m_m67_003	WASP	16	14556.4	0.20669	1454.44	10.0082	33.0667
WASP-04m_m67_003	WASP	32	17533.5	0.268752	1454.44	12.0552	33.0667
WASP-04m_m67_003	WASP	20	13623.2	0.448537	1454.44	9.36662	33.0667
WASP-04m_m67_003	WASP	40	17122.3	0.64966	1454.44	11.7724	33.0667
WASP-04m_m67_003	WASP	68	23805.2	1.21403	1454.44	16.3673	33.0667
WASP-04m_m67_003	WASP	24	16120	0.332334	1454.44	11.0833	33.0667
WASP-04m_m67_003	WASP	16	14660.7	0.193412	1454.44	10.08	33.0667
WASP-04m_m67_003	WASP	104	26321.1	1.13463	1454.44	18.0971	33.0667
WASP-04m_m67_003	WASP	56	16913.7	0.684879	1454.44	11.629	33.0667
WASP-04m_m67_003	WASP	20	17599.7	0.222647	1454.44	12.1007	33.0667
WASP-04m_m67_003	WASP	44	19304.2	0.516839	1454.44	13.2726	33.0667
WASP-04m_m67_003	WASP	16	15627.4	0.138076	1454.44	10.7447	33.0667
WASP-04m_m67_003	WASP	16	16623.4	0.398156	1454.44	11.4294	33.0667
WASP-04m_m67_003	WASP	20	12521.1	0.413761	1454.44	8.6089	33.0667
WASP-04m_m67_003	WASP	16	13424.6	0.229094	1454.44	9.23006	33.0667
WASP-04m_m67_003	WASP	72	15309.1	0.466495	1454.44	10.5258	33.0667
WASP-04m_m67_003	WASP	68	19517.4	1.17097	1454.44	13.4192	33.0667
WASP-04m_m67_003	WASP	76	17282	0.816093	1454.44	11.8822	33.0667
WASP-04m_m67_003	WASP	88	15826.5	0.670308	1454.44	10.8815	33.0667
WASP-04m_m67_003	WASP	324	23362.5	1.42866	1454.44	16.0629	33.0667
WASP-05m_m67_001	WASP	28	5293.36	0.143724	485.635	10.8999	34.2578
WASP-05m_m67_001	WASP	104	6908.47	0.684771	485.635	14.2256	34.2578
WASP-05m_m67_001	WASP	28	4945.78	0.482263	485.635	10.1842	34.2578
WASP-05m_m67_001	WASP	172	11069.7	0.626285	485.635	22.7942	34.2578
WASP-05m_m67_001	WASP	16	5105.79	0.176423	485.635	10.5136	34.2578
WASP-05m_m67_001	WASP	164	9783.21	1.39618	485.635	20.1452	34.2578
WASP-05m_m67_001	WASP	24	5330.13	0.565458	485.635	10.9756	34.2578
WASP-05m_m67_001	WASP	24	5100.43	0.324791	485.635	10.5026	34.2578
WASP-05m_m67_001	WASP	56	5342.71	1.0373	485.635	11.0015	34.2578
WASP-05m_m67_001	WASP	16	5253.99	0.302045	485.635	10.8188	34.2578
WASP-05m_m67_001	WASP	32	5619.64	0.583273	485.635	11.5717	34.2578
WASP-05m_m67_001	WASP	52	6049.57	0.690119	485.635	12.457	34.2578
WASP-05m_m67_001	WASP	36	5512.19	0.757804	485.635	11.3505	34.2578
WASP-05m_m67_001	WASP	332	7289.56	1.16501	485.635	15.0104	34.2578
WASP-05m_m67_001	WASP	28	5594.86	0.56769	485.635	11.5207	34.2578
WASP-05m_m67_001	WASP	16	4973.73	0.441577	485.635	10.2417	34.2578
WASP-05m_m67_001	WASP	44	5916.8	0.640709	485.635	12.1836	34.2578
WASP-05m_m67_001	WASP	16	3745.63	0.277434	485.635	7.71285	34.2578
WASP-05m_m67_001	WASP	20	5286.98	0.382739	485.635	10.8867	34.2578
WASP-05m_m67_001	WASP	16	5071.68	0.198161	485.635	10.4434	34.2578
WASP-05m_m67_001	WASP	88	14716.8	0.623595	485.635	30.3043	34.2578
WASP-05m_m67_001	WASP	36	6591.15	0.464758	485.635	13.5722	34.2578
WASP-05m_m67_001	WASP	16	4127.11	0.586553	485.635	8.49837	34.2578
WASP-05m_m67_002	WASP	64	5568.05	0.860805	449.983	12.3739	18.6489
WASP-05m_m67_002	WASP	88	4571.36	0.7441	449.983	10.159	18.6489
WASP-05m_m67_002	WASP	20	3914.31	0.289062	449.983	8.69879	18.6489
WASP-05m_m67_002	WASP	20	4536.18	0.240254	449.983	10.0808	18.6489
WASP-05m_m67_002	WASP	16	5556.76	0.744544	449.983	12.3488	18.6489
WASP-05m_m67_002	WASP	40	4453.74	0.581008	449.983	9.89757	18.6489
WASP-05m_m67_002	WASP	16	3976.5	0.536769	449.983	8.837	18.6489
WASP-05m_m67_002	WASP	204	6403.35	0.993897	449.983	14.2302	18.6489
WASP-05m_m67_002	WASP	20	3851.89	0.511681	449.983	8.56008	18.6489
WASP-05m_m67_002	WASP	24	4661.47	0.51078	449.983	10.3592	18.6489
WASP-05m_m67_002	WASP	28	5154.88	0.486925	449.983	11.4557	18.6489
WASP-05m_m67_002	WASP	20	4728.65	0.258593	449.983	10.5085	18.6489
WASP-05m_m67_002	WASP	16	4132.79	0.614806	449.983	9.18433	18.6489
WASP-05m_m67_002	WASP	24	3895.74	0.495171	449.983	8.65754	18.6489
WASP-05m_m67_002	WASP	16	4541.82	0.116011	449.983	10.0933	18.6489
WASP-05m_m67_002	WASP	48	5163.45	0.46469	449.983	11.4748	18.6489
WASP-05m_m67_002	WASP	16	4347.12	0.594204	449.983	9.66063	18.6489
WASP-05m_m67_002	WASP	16	4536.12	0.586078	449.983	10.0806	18.6489
WASP-05m_m67_002	WASP	132	5017.78	1.12668	449.983	11.151	18.6489
WASP-05m_m67_002	WASP	16	4662.35	0.270059	449.983	10.3612	18.6489
WASP-05m_m67_002	WASP	36	4712.94	0.913047	449.983	10.4736	18.6489
WASP-05m_m67_002	WASP	20	4828.28	0.420159	449.983	10.7299	18.6489
WASP-05m_m67_002	WASP	24	4258.83	0.489079	449.983	9.46442	18.6489
WASP-05m_m67_002	WASP	68	6761.93	0.507687	449.983	15.0271	18.6489
WASP-05m_m67_002	WASP	20	5322.54	0.27593	449.983	11.8283	18.6489
WASP-05m_m67_002	WASP	20	4631.12	0.706387	449.983	10.2918	18.6489
WASP-05m_m67_002	WASP	36	4012.29	0.616984	449.983	8.91655	18.6489
WASP-05m_m67_002	WASP	28	5219.74	0.410749	449.983	11.5999	18.6489
WASP-05m_m67_002	WASP	24	5004.37	0.470517	449.983	11.1213	18.6489
WASP-05m_m67_002	WASP	24	4691.73	0.832485	449.983	10.4265	18.6489
WASP-05m_m67_002	WASP	68	5995.35	0.610565	449.983	13.3235	18.6489
WASP-05m_m67_002	WASP	24	3900.36	0.418297	449.983	8.66781	18.6489
WASP-05m_m67_003	WASP	364	8388.28	1.15277	383.308	21.8839	40.1244
WASP-05m_m67_003	WASP	40	3956.32	0.739714	383.308	10.3215	40.1244
WASP-05m_m67_003	WASP	24	3943.59	0.579944	383.308	10.2883	40.1244
WASP-05m_m67_003	WASP	44	4342.1	0.754073	383.308	11.3279	40.1244
WASP-05m_m67_003	WASP	44	3714.03	0.449544	383.308	9.68942	40.1244
WASP-05m_m67_003	WASP	28	4053.16	0.197282	383.308	10.5742	40.1244
WASP-05m_m67_003	WASP	32	4174.51	0.761765	383.308	10.8907	40.1244
WASP-05m_m67_003	WASP	24	4375.07	0.596556	383.308	11.414	40.1244
WASP-05m_m67_003	WASP	28	4343.58	0.871442	383.308	11.3318	40.1244
WASP-05m_m67_003	WASP	32	4330.22	0.612687	383.308	11.297	40.1244
WASP-05m_m67_003	WASP	24	4559.86	0.412325	383.308	11.8961	40.1244
WASP-05m_m67_003	WASP	16	5381.89	0.586037	383.308	14.0406	40.1244
WASP-05m_m67_003	WASP	32	4869.88	0.540328	383.308	12.7049	40.1244
WASP-05m_m67_003	WASP	16	5322.68	0.308467	383.308	13.8861	40.1244
WASP-05m_m67_003	WASP	32	4815.37	0.411812	383.308	12.5627	40.1244
WASP-05m_m67_003	WASP	20	4808.56	0.827944	383.308	12.5449	40.1244
WASP-05m_m67_003	WASP	16	5561.15	0.169111	383.308	14.5083	40.1244
WASP-05m_m67_003	WASP	20	4927.06	0.433266	383.308	12.854	40.1244
WASP-05m_m67_003	WASP	20	5142.87	0.312512	383.308	13.4171	40.1244
WASP-05m_m67_003	WASP	192	5987.15	1.05635	383.308	15.6197	40.1244
WASP-05m_m67_003	WASP	24	5886.66	0.829763	383.308	15.3575	40.1244
WASP-05m_m67_003	WASP	16	5078.57	0.256922	383.308	13.2493	40.1244
WASP-05m_m67_003	WASP	28	5574.4	0.303916	383.308	14.5428	40.1244
WASP-05m_m67_003	WASP	32	5400.68	0.46515	383.308	14.0897	40.1244
WASP-05m_m67_003	WASP	20	3572	0.407463	383.308	9.31886	40.1244
WASP-05m_m67_003	WASP	96	6347.25	0.825721	383.308	16.5591	40.1244
WASP-05m_m67_003	WASP	68	3744.06	0.598473	383.308	9.76775	40.1244

## Sheet: PooledValues
			45.134	54.965		6733.59	12187.1		0.713856	0.566944		13.1117	12.6382
NMJ	NMJ		Duration	Duration		MeanIntensity	MeanIntensity		NormIntensityRange	NormIntensityRange		NormPatchInt	NormPatchInt
Cont	WASpRNAi		Cont	WASpRNAi		Cont	WASpRNAi		Cont	WASpRNAi		Cont	WASpRNAi
CONT-01m_m67_001	WASp-01m_m67_001		16	36		3905.65	8259.12		0.766228	0.66058		14.6657	10.0017
CONT-01m_m67_001	WASp-01m_m67_001		32	16		2492.2	7456.01		0.853161	0.272527		9.35822	9.02918
CONT-01m_m67_001	WASp-01m_m67_001		84	16		3775.37	7889.79		1.59288	0.382572		14.1765	9.55448
CONT-01m_m67_001	WASp-01m_m67_002		92	356		4143.48	9885.16		0.792231	0.990363		15.5588	13.0423
CONT-01m_m67_001	WASp-01m_m67_002		20	36		2988.08	7409.57		0.694621	0.457564		11.2203	9.77608
CONT-01m_m67_001	WASp-01m_m67_002		16	24		2431.92	6915.39		0.265422	0.633771		9.1319	9.12407
CONT-01m_m67_001	WASp-01m_m67_003		28	76		3456.56	19584		0.9836	0.969546		12.9794	25.4806
CONT-01m_m67_001	WASp-01m_m67_003		60	32		3372.52	9373.61		0.637985	0.80164		12.6638	12.196
CONT-01m_m67_001	WASp-01m_m67_003		48	20		2941.54	6890.6		1.18416	0.240298		11.0455	8.96533
CONT-01m_m67_001	WASp-01m_m67_003		16	128		2893.86	13720.7		0.608972	0.883781		10.8665	17.852
CONT-01m_m67_001	WASp-01m_m67_003		148	28		4127.62	7837.37		1.25597	0.22089		15.4993	10.1972
CONT-01m_m67_001	WASp-01m_m67_003		52	52		3294.2	11319.6		0.884196	0.706979		12.3698	14.7279
CONT-01m_m67_001	WASp-01m_m67_003		16	28		3000.53	9513.04		0.256592	0.590292		11.267	12.3774
CONT-01m_m67_001	WASp-01m_m67_003		16	32		4016.26	8887.7		0.553481	0.516514		15.0811	11.5637
CONT-01m_m67_001	WASp-01m_m67_003		32	28		2706.02	9900.18		0.809772	0.513183		10.1611	12.8811
CONT-01m_m67_001	WASp-01m_m67_003		56	28		4213.08	7499.65		1.48957	0.570808		15.8202	9.75777
CONT-01m_m67_001	WASp-01m_m67_003		16	64		3344.91	8622.39		0.402055	0.681927		12.5602	11.2185
CONT-01m_m67_001	WASp-01m_m67_003		16	52		3048.97	8016.9		0.159436	0.448986		11.4489	10.4307
CONT-01m_m67_001	WASp-01m_m67_003		40	32		3053.51	9295.78		0.779002	0.492093		11.466	12.0947
CONT-01m_m67_001	WASp-02m_m67_001		88	16		3138.15	8679.61		1.06305	0.498661		11.7838	9.87705
CONT-01m_m67_001	WASp-02m_m67_001		24	36		2363.31	9205.19		0.33869	0.583056		8.87427	10.4751
CONT-01m_m67_001	WASp-02m_m67_001		28	20		2754.81	14834.9		0.520973	0.454021		10.3443	16.8816
CONT-01m_m67_001	WASp-02m_m67_001		20	28		3749.24	12531.5		0.511695	0.297016		14.0784	14.2604
CONT-01m_m67_001	WASp-02m_m67_001		16	64		2547.49	14179.6		0.933358	0.414529		9.56585	16.1359
CONT-01m_m67_001	WASp-02m_m67_001		24	20		2461.82	10850.2		0.385377	0.183423		9.24417	12.347
CONT-01m_m67_001	WASp-02m_m67_001		16	56		2816.1	13401.8		0.306011	0.589844		10.5745	15.2507
CONT-01m_m67_001	WASp-02m_m67_001		28	24		2658.49	13778		0.731815	0.349199		9.98267	15.6788
CONT-01m_m67_001	WASp-02m_m67_001		40	16		3249.86	17730.5		0.821756	0.294043		12.2033	20.1766
CONT-01m_m67_001	WASp-02m_m67_001		36	20		3075.62	15930		0.447613	0.346319		11.549	18.1277
CONT-01m_m67_001	WASp-02m_m67_001		156	140		5583.44	15952.9		1.40753	0.974639		20.9659	18.1538
CONT-01m_m67_001	WASp-02m_m67_001		24	28		3252.39	12586.2		0.946496	0.334403		12.2128	14.3226
CONT-01m_m67_001	WASp-02m_m67_001		144	16		3103.86	14737.3		1.03346	0.223532		11.655	16.7705
CONT-01m_m67_001	WASp-02m_m67_001		44	36		3461.11	9329.62		0.604261	0.448271		12.9965	10.6167
CONT-01m_m67_001	WASp-02m_m67_001		28	100		3207.36	9935.1		0.864357	0.713432		12.0437	11.3058
CONT-01m_m67_001	WASp-02m_m67_001		56	28		3639.58	8684.12		0.92669	0.347719		13.6667	9.88218
CONT-01m_m67_001	WASp-02m_m67_001		96	20		4131.61	10098.5		0.979854	0.419511		15.5142	11.4917
CONT-01m_m67_001	WASp-02m_m67_001		16	64		2780.13	10857.7		0.829659	0.62533		10.4394	12.3556
CONT-01m_m67_001	WASp-02m_m67_002		20	64		3638.49	13177.3		0.805627	0.83425		13.6626	12.5005
CONT-01m_m67_001	WASp-02m_m67_002		16	20		2479.35	12936.6		0.504997	0.511998		9.30998	12.2722
CONT-01m_m67_001	WASp-02m_m67_002		76	28		3625.78	17464.7		0.752609	0.334295		13.6148	16.5677
CONT-01m_m67_001	WASp-02m_m67_002		40	16		3491.56	12584.6		0.911841	0.227897		13.1108	11.9382
CONT-01m_m67_001	WASp-02m_m67_002		16	20		3176.82	13994.7		0.578825	0.233006		11.929	13.2759
CONT-01m_m67_001	WASp-02m_m67_002		112	28		3847.78	14099.2		1.18987	0.485831		14.4484	13.3751
CONT-01m_m67_001	WASp-02m_m67_002		16	24		1829.43	11292.6		0.560963	0.45752		6.86955	10.7126
CONT-01m_m67_001	WASp-02m_m67_002		64	52		3726.64	11420.6		1.01259	0.732697		13.9936	10.834
CONT-01m_m67_001	WASp-02m_m67_002		36	64		3826.92	12986.4		0.571029	0.753472		14.3701	12.3194
CONT-01m_m67_001	WASp-02m_m67_002		28	16		2031.57	11622.7		0.945463	0.339578		7.62857	11.0257
CONT-01m_m67_001	WASp-02m_m67_002		148	44		7278.22	11249.4		0.891211	0.407347		27.3298	10.6716
CONT-01m_m67_001	WASp-02m_m67_003		68	44		5260.93	18589.4		1.84603	0.346146		19.7548	12.2948
CONT-01m_m67_001	WASp-02m_m67_003		28	20		3057.58	16803.3		0.202103	0.129608		11.4812	11.1135
CONT-01m_m67_001	WASp-02m_m67_003		40	20		3535.52	17378.9		0.999944	0.602503		13.2759	11.4942
CONT-01m_m67_001	WASp-02m_m67_003		24	16		2203.25	17308.4		0.315074	0.214996		8.27323	11.4476
CONT-01m_m67_001	WASp-02m_m67_003		36	28		5159.93	15892.4		0.869855	0.370637		19.3756	10.511
CONT-01m_m67_001	WASp-02m_m67_003		28	28		3198.98	18149.1		0.798746	0.489162		12.0122	12.0036
CONT-01m_m67_001	WASp-02m_m67_003		68	16		3665.45	18037.9		1.03868	0.205531		13.7638	11.93
CONT-01m_m67_001	WASP-03f_m67_001		48	20		3074.64	11078.7		0.726625	0.267917		11.5453	9.71568
CONT-01m_m67_001	WASP-03f_m67_001		28	72		3060.22	13994.2		0.554092	0.742998		11.4912	12.2725
CONT-01m_m67_001	WASP-03f_m67_001		60	20		4401.17	12585		0.822345	0.373915		16.5264	11.0367
CONT-01m_m67_001	WASP-03f_m67_001		20	136		2436.25	19897.9		0.630933	0.627683		9.14815	17.4499
CONT-01m_m67_001	WASP-03f_m67_001		28	20		2711.03	12229.6		1.16975	0.390201		10.18	10.725
CONT-01m_m67_001	WASP-03f_m67_001		16	260		2956.44	25698		0.396167	0.983763		11.1015	22.5364
CONT-01m_m67_001	WASP-03f_m67_001		24	64		2472.19	11915.7		0.679458	0.547675		9.2831	10.4497
CONT-01m_m67_001	WASP-03f_m67_001		16	16		3550.46	15143.7		0.694332	0.370319		13.332	13.2806
CONT-01m_m67_001	WASP-03f_m67_001		28	32		3385.48	17957.2		1.01641	0.220324		12.7125	15.748
CONT-01m_m67_001	WASP-03f_m67_001		24	156		5003.78	15361.2		0.706762	0.870877		18.7892	13.4713
CONT-01m_m67_001	WASP-03f_m67_001		28	84		3292.15	20171.2		0.63057	1.10111		12.362	17.6896
CONT-01m_m67_001	WASP-03f_m67_001		16	72		2593.81	15711		0.38517	0.355398		9.7398	13.7781
CONT-01m_m67_001	WASP-03f_m67_001		20	56		2613.74	14085.2		0.321389	0.450891		9.81463	12.3523
CONT-01m_m67_001	WASP-03f_m67_001		92	60		6024.23	27817.8		1.04565	0.722276		22.621	24.3954
CONT-01m_m67_001	WASP-03f_m67_001		24	20		2984.76	14821.5		0.873711	0.377665		11.2078	12.9981
CONT-01m_m67_001	WASP-03f_m67_001		16	24		2456.01	15187.9		0.573407	0.729014		9.22233	13.3193
CONT-01m_m67_001	WASP-03f_m67_001		16	16		2926.09	14031.2		0.778141	0.422316		10.9875	12.305
CONT-01m_m67_001	WASP-03f_m67_001		36	240		4140.03	24071.1		0.573672	1.38181		15.5459	21.1096
CONT-01m_m67_002	WASP-03f_m67_001		60	224		7337.3	19950		0.989335	1.42985		16.9179	17.4956
CONT-01m_m67_002	WASP-03f_m67_001		24	40		6497.71	14256.4		0.54937	0.774337		14.982	12.5025
CONT-01m_m67_002	WASP-03f_m67_002		16	356		4061.79	20636.1		0.182043	1.11421		9.36543	16.4952
CONT-01m_m67_002	WASP-03f_m67_002		16	48		3634.2	13216.9		0.395602	0.565742		8.37952	10.5647
CONT-01m_m67_002	WASP-03f_m67_002		28	44		4311.5	16677.5		1.03092	0.714781		9.9412	13.3309
CONT-01m_m67_002	WASP-03f_m67_002		84	28		7933.71	13727.2		1.33123	0.503199		18.2931	10.9726
CONT-01m_m67_002	WASP-03f_m67_002		28	16		5030.1	10876.4		0.583608	0.323321		11.5981	8.69391
CONT-01m_m67_002	WASP-03f_m67_002		28	24		3968.86	12404.2		0.851955	0.382472		9.15117	9.91513
CONT-01m_m67_002	WASP-03f_m67_002		44	104		5040.82	20986.7		0.776255	1.11347		11.6228	16.7754
CONT-01m_m67_002	WASP-03f_m67_002		20	28		4556.69	12498		0.690302	0.457122		10.5066	9.99008
CONT-01m_m67_002	WASP-03f_m67_002		36	16		4909.96	14645.6		0.898424	0.196572		11.3211	11.7067
CONT-01m_m67_002	WASP-03f_m67_002		16	40		5668.7	11965.8		0.164375	0.419613		13.0706	9.56465
CONT-01m_m67_002	WASP-03f_m67_002		80	68		5454.31	17404.3		1.05658	0.803606		12.5762	13.9119
CONT-01m_m67_002	WASP-03f_m67_002		28	16		4960.52	11162.3		0.859422	0.162537		11.4377	8.92237
CONT-01m_m67_002	WASP-03f_m67_002		180	204		11233.6	23715.9		1.50879	0.851007		25.9017	18.9569
CONT-01m_m67_002	WASP-03f_m67_002		40	20		7032.42	12007.7		0.481288	0.573167		16.2149	9.59812
CONT-01m_m67_002	WASP-03f_m67_002		24	24		6639.91	14655.4		0.897696	0.569257		15.3099	11.7146
CONT-01m_m67_002	WASP-03f_m67_002		32	84		4693.71	26038.1		0.419126	1.40164		10.8225	20.8131
CONT-01m_m67_002	WASP-03f_m67_002		20	28		5003.07	12558		0.396637	0.320181		11.5358	10.038
CONT-01m_m67_002	WASP-03f_m67_002		16	32		3412.15	13753		0.30039	0.438701		7.86754	10.9933
CONT-01m_m67_002	WASP-03f_m67_002		44	24		5980.15	13908.7		0.664352	0.337193		13.7887	11.1177
CONT-01m_m67_002	WASP-03f_m67_002		180	88		8904.53	18745.6		1.601	0.687946		20.5315	14.984
CONT-01m_m67_002	WASP-03f_m67_002		28	24		3836.82	10343		0.592548	0.43848		8.84671	8.2675
CONT-01m_m67_002	WASP-03f_m67_002		20	40		4406.74	13783.3		0.451557	0.457128		10.1608	11.0174
CONT-01m_m67_002	WASP-03f_m67_002		16	100		5258.99	23457.8		0.525358	0.916301		12.1259	18.7506
CONT-01m_m67_002	WASP-03f_m67_002		24	68		4760.79	14610		0.664227	0.553726		10.9772	11.6783
CONT-01m_m67_002	WASP-03f_m67_002		36	56		5458.05	16379.7		0.736713	0.518088		12.5848	13.0928
CONT-01m_m67_002	WASP-03f_m67_002		16	48		5749.58	14599.9		0.75346	0.545112		13.257	11.6702
CONT-01m_m67_002	WASP-03f_m67_002		20	48		6766.46	14987.7		0.267975	0.75054		15.6017	11.9802
CONT-01m_m67_002	WASP-03f_m67_002		20	60		5637.83	24033		0.42163	0.993657		12.9994	19.2104
CONT-01m_m67_002	WASP-03f_m67_002		16	16		4681.74	13867.3		0.405984	0.161783		10.7949	11.0846
CONT-01m_m67_002	WASP-03f_m67_002		40	24		5121.63	14979.5		0.628057	0.186178		11.8092	11.9736
CONT-01m_m67_002	WASP-03f_m67_002		28	24		4553.39	13512.5		0.68206	0.306809		10.4989	10.801
CONT-01m_m67_002	WASP-03f_m67_002		104	56		14420.3	15066.4		1.00697	0.529951		33.2496	12.0431
CONT-01m_m67_002	WASP-03f_m67_002		24	16		5852.52	14106.7		0.670077	0.303856		13.4944	11.276
CONT-01m_m67_002	WASP-03f_m67_002		72	104		8607.09	24079.8		1.37408	1.03284		19.8457	19.2478
CONT-01m_m67_002	WASP-03f_m67_002		16	24		4912.66	14110.7		0.437748	0.202185		11.3273	11.2792
CONT-01m_m67_002	WASP-03f_m67_002		36	100		5996.8	18643.5		0.709467	0.638454		13.8271	14.9024
CONT-01m_m67_002	WASP-03f_m67_002		16	84		4485.27	18518.7		0.307479	0.714497		10.3419	14.8026
CONT-01m_m67_002	WASP-03f_m67_002		20	24		5311.48	15703.3		0.717341	0.291408		12.2469	12.5522
CONT-01m_m67_002	WASP-03f_m67_002		80	52		11760.5	22148.8		1.02015	0.737685		27.1167	17.7043
CONT-01m_m67_002	WASP-03f_m67_002		64	16		8796.32	15618		0.746752	0.359686		20.282	12.484
CONT-01m_m67_002	WASP-03f_m67_002		36	28		9210.89	17688.2		0.78958	0.554075		21.2379	14.1388
CONT-01m_m67_002	WASP-03f_m67_002		16	64		4120.02	19121.8		0.301327	0.489584		9.4997	15.2847
CONT-01m_m67_002	WASP-03f_m67_002		88	252		7709.46	20162.6		1.39038	1.11708		17.776	16.1166
CONT-01m_m67_002	WASP-03f_m67_002		88	160		8347.93	22786.5		1.92274	0.940762		19.2482	18.214
CONT-01m_m67_002	WASP-03f_m67_002		76	344		8067.75	26682.5		1.0284	1.04832		18.6022	21.3282
CONT-01m_m67_002	WASP-03f_m67_002		52	32		8386.29	13089.4		1.26549	0.535598		19.3366	10.4628
CONT-01m_m67_002	WASP-04m_m67_001		80	132		7005.03	22598.2		0.744453	1.03932		16.1518	23.7265
CONT-01m_m67_002	WASP-04m_m67_001		68	16		6880.51	9793.18		0.691405	0.518638		15.8647	10.2821
CONT-01m_m67_002	WASP-04m_m67_001		16	68		4486.48	14706		0.294333	1.18182		10.3447	15.4402
CONT-01m_m67_002	WASP-04m_m67_001		16	32		5150.14	16456.9		0.761527	0.95174		11.8749	17.2785
CONT-01m_m67_002	WASP-04m_m67_001		16	88		5036.34	14112.4		0.506484	0.736428		11.6125	14.817
CONT-01m_m67_002	WASP-04m_m67_001		44	16		5858.24	10649.1		0.683847	0.0504335		13.5076	11.1808
CONT-01m_m67_002	WASP-04m_m67_001		52	16		5920.96	11656.6		0.977334	0.352623		13.6522	12.2385
CONT-01m_m67_002	WASP-04m_m67_001		52	44		7045.49	10485.8		0.627145	0.499434		16.2451	11.0093
CONT-01m_m67_002	WASP-04m_m67_001		28	36		5034.63	10640.5		0.758962	0.616009		11.6086	11.1717
CONT-01m_m67_002	WASP-04m_m67_001		28	20		5384.52	8954.63		0.643876	0.515628		12.4153	9.4017
CONT-01m_m67_002	WASP-04m_m67_001		36	108		5784.51	13178.1		0.651808	0.809845		13.3376	13.836
CONT-01m_m67_002	WASP-04m_m67_001		32	20		6220.41	10692.3		0.704335	0.406994		14.3426	11.2262
CONT-01m_m67_002	WASP-04m_m67_001		36	44		5525.5	11528.1		0.877673	1.00181		12.7404	12.1036
CONT-01m_m67_002	WASP-04m_m67_001		100	96		8797.33	15259.3		1.02544	0.91331		20.2844	16.0212
CONT-01m_m67_002	WASP-04m_m67_001		20	68		5037.89	14168.7		0.381313	0.749557		11.6161	14.8761
CONT-01m_m67_003	WASP-04m_m67_001		28	36		6875.2	11371.5		0.641585	0.752249		13.3732	11.9393
CONT-01m_m67_003	WASP-04m_m67_001		52	20		8475.98	10105.3		0.70496	0.719312		16.487	10.6098
CONT-01m_m67_003	WASP-04m_m67_001		80	16		9456.74	10367.7		1.08085	0.073658		18.3947	10.8854
CONT-01m_m67_003	WASP-04m_m67_001		48	16		5599.84	10924.7		0.753888	0.294644		10.8925	11.4701
CONT-01m_m67_003	WASP-04m_m67_001		72	16		10808.6	11064.1		1.38666	0.540708		21.0242	11.6164
CONT-01m_m67_003	WASP-04m_m67_001		16	16		5502.88	12496.8		0.421196	0.226251		10.7039	13.1207
CONT-01m_m67_003	WASP-04m_m67_001		124	20		9734.49	9349.15		1.37824	0.31247		18.935	9.81592
CONT-01m_m67_003	WASP-04m_m67_001		24	80		6944.44	17637.6		0.800426	0.930097		13.5079	18.5181
CONT-01m_m67_003	WASP-04m_m67_001		72	24		7332.27	8912.24		0.769586	0.318111		14.2623	9.35719
CONT-01m_m67_003	WASP-04m_m67_001		28	32		5825.62	8763.72		0.487423	0.214164		11.3317	9.20126
CONT-01m_m67_003	WASP-04m_m67_002		116	68		10964.9	16457.3		1.1332	0.525825		21.3282	12.1825
CONT-01m_m67_003	WASP-04m_m67_002		24	36		5445.37	14337.1		0.714967	0.603525		10.592	10.613
CONT-01m_m67_003	WASP-04m_m67_002		112	20		11545.4	13333.9		1.14788	0.286906		22.4574	9.87039
CONT-01m_m67_003	WASP-04m_m67_002		108	16		9037.33	12521.5		1.29585	0.254721		17.5789	9.26905
CONT-01m_m67_003	WASP-04m_m67_002		52	84		4867.02	18991.9		0.498826	0.914923		9.46704	14.0588
CONT-01m_m67_003	WASP-04m_m67_002		60	84		7111.39	24768		0.874307	0.964658		13.8327	18.3345
CONT-01m_m67_003	WASP-04m_m67_002		24	56		5477.78	13277.7		0.413198	0.517579		10.6551	9.82883
CONT-01m_m67_003	WASP-04m_m67_002		52	24		5738.97	14387.4		0.651524	0.326946		11.1631	10.6503
CONT-01m_m67_003	WASP-04m_m67_002		56	56		6489.22	16583.2		0.816118	0.450193		12.6225	12.2757
CONT-01m_m67_003	WASP-04m_m67_002		40	24		5842.05	13017.2		0.970394	0.370946		11.3636	9.63598
CONT-01m_m67_003	WASP-04m_m67_002		56	192		7577.41	20409.9		0.632481	0.782326		14.7391	15.1084
CONT-01m_m67_003	WASP-04m_m67_002		72	52		7255.56	13048.8		0.99146	0.588509		14.1131	9.65933
CONT-01m_m67_003	WASP-04m_m67_002		48	112		6062.68	25285.3		1.08021	0.640411		11.7928	18.7174
CONT-01m_m67_003	WASP-04m_m67_002		16	176		4768.17	20023.3		0.227868	1.24253		9.27478	14.8222
CONT-01m_m67_003	WASP-04m_m67_002		28	28		6883.77	14502.3		0.542097	0.53867		13.3899	10.7353
CONT-01m_m67_003	WASP-04m_m67_002		16	108		5187.03	15569.1		0.194553	0.781725		10.0895	11.525
CONT-01m_m67_003	WASP-04m_m67_002		56	44		5475.72	13872.6		0.794258	0.410356		10.6511	10.2692
CONT-01m_m67_003	WASP-04m_m67_002		20	36		7411.37	19410.2		0.335834	0.609004		14.4162	14.3683
CONT-01m_m67_003	WASP-04m_m67_002		96	28		9170.4	15545.8		0.924846	0.318418		17.8377	11.5077
CONT-01m_m67_003	WASP-04m_m67_002		84	68		8645.28	15826		1.29956	0.742582		16.8163	11.7152
CONT-01m_m67_003	WASP-04m_m67_002		36	80		6291.45	15915.3		0.928587	0.685372		12.2378	11.7812
CONT-01m_m67_003	WASP-04m_m67_002		56	32		6828.58	15054.5		0.638115	0.490072		13.2826	11.1441
CONT-01m_m67_003	WASP-04m_m67_002		52	344		9210.08	28609.8		1.81947	1.38205		17.9149	21.1783
CONT-01m_m67_003	WASP-04m_m67_002		84	16		6493.77	13635.6		0.867634	0.0318931		12.6313	10.0938
CONT-01m_m67_003	WASP-04m_m67_002		16	32		5362.13	15785.7		0.17673	0.678913		10.4301	11.6854
CONT-01m_m67_003	WASP-04m_m67_002		48	108		9281.49	28208.2		0.892207	1.1733		18.0538	20.8811
CONT-01m_m67_003	WASP-04m_m67_002		52	28		17134.2	14465.6		1.11641	0.334631		33.3285	10.7081
CONT-01m_m67_003	WASP-04m_m67_002		16	112		6214.97	21392.9		0.409048	1.0872		12.089	15.836
CONT-01m_m67_003	WASP-04m_m67_002		32	28		8834.26	16014.3		1.00575	0.465732		17.1839	11.8546
CONT-01m_m67_003	WASP-04m_m67_002		28	36		6217.65	13830.3		0.763278	0.376112		12.0942	10.2378
CONT-01m_m67_003	WASP-04m_m67_002		28	72		6007.75	14511.8		0.497501	0.7776		11.6859	10.7424
CONT-01m_m67_003	WASP-04m_m67_003		24	40		5755.65	20903.6		1.04615	0.699158		11.1956	14.3723
CONT-01m_m67_003	WASP-04m_m67_003		68	16		8578.87	14448.2		0.991393	0.304642		16.6871	9.93387
CONT-01m_m67_003	WASP-04m_m67_003		204	16		13594	14357.9		1.20984	0.442745		26.4423	9.87175
CONT-01m_m67_003	WASP-04m_m67_003		48	56		8837.22	15542.3		0.975853	0.631595		17.1897	10.6861
CONT-01m_m67_003	WASP-04m_m67_003		56	20		5487.68	14639.8		1.14877	0.431771		10.6743	10.0656
CONT-02m_m67_001	WASP-04m_m67_003		36	56		13508.9	14793.3		0.700262	0.309625		17.9412	10.1712
CONT-02m_m67_001	WASP-04m_m67_003		20	16		8329.06	12879		0.602355	0.158074		11.0618	8.85495
CONT-02m_m67_001	WASP-04m_m67_003		28	16		6896.12	14556.4		0.419353	0.20669		9.15871	10.0082
CONT-02m_m67_001	WASP-04m_m67_003		16	32		7749.1	17533.5		0.26244	0.268752		10.2915	12.0552
CONT-02m_m67_001	WASP-04m_m67_003		56	20		10505	13623.2		0.899449	0.448537		13.9516	9.36662
CONT-02m_m67_001	WASP-04m_m67_003		28	40		7359.03	17122.3		0.505461	0.64966		9.77349	11.7724
CONT-02m_m67_001	WASP-04m_m67_003		44	68		8600.94	23805.2		0.591353	1.21403		11.4229	16.3673
CONT-02m_m67_001	WASP-04m_m67_003		16	24		7563.81	16120		0.605887	0.332334		10.0455	11.0833
CONT-02m_m67_001	WASP-04m_m67_003		36	16		7904.02	14660.7		0.474106	0.193412		10.4973	10.08
CONT-02m_m67_001	WASP-04m_m67_003		24	104		7637.25	26321.1		0.287487	1.13463		10.143	18.0971
CONT-02m_m67_001	WASP-04m_m67_003		32	56		8528.41	16913.7		0.746589	0.684879		11.3265	11.629
CONT-02m_m67_001	WASP-04m_m67_003		20	20		7496.61	17599.7		0.233948	0.222647		9.95621	12.1007
CONT-02m_m67_001	WASP-04m_m67_003		28	44		8110.54	19304.2		0.364191	0.516839		10.7716	13.2726
CONT-02m_m67_001	WASP-04m_m67_003		172	16		14023.3	15627.4		1.20626	0.138076		18.6242	10.7447
CONT-02m_m67_001	WASP-04m_m67_003		64	16		14959.3	16623.4		0.623893	0.398156		19.8674	11.4294
CONT-02m_m67_001	WASP-04m_m67_003		40	20		8863.75	12521.1		0.618812	0.413761		11.7719	8.6089
CONT-02m_m67_001	WASP-04m_m67_003		44	16		8068.04	13424.6		0.515922	0.229094		10.7151	9.23006
CONT-02m_m67_001	WASP-04m_m67_003		16	72		6096.08	15309.1		0.124193	0.466495		8.09618	10.5258
CONT-02m_m67_001	WASP-04m_m67_003		20	68		6224.76	19517.4		0.453836	1.17097		8.26707	13.4192
CONT-02m_m67_001	WASP-04m_m67_003		20	76		7774.25	17282		0.454438	0.816093		10.3249	11.8822
CONT-02m_m67_001	WASP-04m_m67_003		40	88		14759.2	15826.5		0.482389	0.670308		19.6017	10.8815
CONT-02m_m67_001	WASP-04m_m67_003		24	324		7316.74	23362.5		0.282353	1.42866		9.71732	16.0629
CONT-02m_m67_001	WASP-05m_m67_001		92	28		14868	5293.36		0.827287	0.143724		19.7461	10.8999
CONT-02m_m67_001	WASP-05m_m67_001		32	104		9142.57	6908.47		0.745302	0.684771		12.1422	14.2256
CONT-02m_m67_001	WASP-05m_m67_001		20	28		7058.3	4945.78		0.440018	0.482263		9.3741	10.1842
CONT-02m_m67_001	WASP-05m_m67_001		20	172		9208.89	11069.7		0.670231	0.626285		12.2303	22.7942
CONT-02m_m67_001	WASP-05m_m67_001		76	16		8672.07	5105.79		0.986086	0.176423		11.5173	10.5136
CONT-02m_m67_001	WASP-05m_m67_001		64	164		10360.9	9783.21		0.734289	1.39618		13.7602	20.1452
CONT-02m_m67_001	WASP-05m_m67_001		16	24		6775.81	5330.13		0.159459	0.565458		8.99893	10.9756
CONT-02m_m67_001	WASP-05m_m67_001		20	24		10863	5100.43		0.573335	0.324791		14.4271	10.5026
CONT-02m_m67_001	WASP-05m_m67_001		20	56		8475.35	5342.71		0.621494	1.0373		11.2561	11.0015
CONT-02m_m67_001	WASP-05m_m67_001		148	16		10139.7	5253.99		1.03165	0.302045		13.4665	10.8188
CONT-02m_m67_001	WASP-05m_m67_001		36	32		10462.3	5619.64		0.906932	0.583273		13.895	11.5717
CONT-02m_m67_001	WASP-05m_m67_001		24	52		9073.52	6049.57		0.486355	0.690119		12.0505	12.457
CONT-02m_m67_001	WASP-05m_m67_001		32	36		13272.8	5512.19		0.818605	0.757804		17.6275	11.3505
CONT-02m_m67_001	WASP-05m_m67_001		40	332		8196.02	7289.56		0.744675	1.16501		10.8851	15.0104
CONT-02m_m67_001	WASP-05m_m67_001		48	28		8586.73	5594.86		0.714676	0.56769		11.404	11.5207
CONT-02m_m67_001	WASP-05m_m67_001		28	16		8271.07	4973.73		0.407998	0.441577		10.9848	10.2417
CONT-02m_m67_001	WASP-05m_m67_001		20	44		8181.1	5916.8		0.408154	0.640709		10.8653	12.1836
CONT-02m_m67_001	WASP-05m_m67_001		28	16		10183.8	3745.63		0.935448	0.277434		13.525	7.71285
CONT-02m_m67_001	WASP-05m_m67_001		40	20		8986.48	5286.98		0.46341	0.382739		11.9349	10.8867
CONT-02m_m67_001	WASP-05m_m67_001		68	16		10704.4	5071.68		0.575586	0.198161		14.2164	10.4434
CONT-02m_m67_001	WASP-05m_m67_001		96	88		13989.1	14716.8		1.27624	0.623595		18.5789	30.3043
CONT-02m_m67_001	WASP-05m_m67_001		20	36		8771.9	6591.15		0.498852	0.464758		11.6499	13.5722
CONT-02m_m67_001	WASP-05m_m67_001		104	16		11261.4	4127.11		0.80643	0.586553		14.9562	8.49837
CONT-02m_m67_001	WASP-05m_m67_002		24	64		8089.98	5568.05		0.519126	0.860805		10.7443	12.3739
CONT-02m_m67_001	WASP-05m_m67_002		16	88		7554.36	4571.36		0.17527	0.7441		10.0329	10.159
CONT-02m_m67_001	WASP-05m_m67_002		16	20		9033.71	3914.31		0.378714	0.289062		11.9976	8.69879
CONT-02m_m67_001	WASP-05m_m67_002		20	20		10396	4536.18		0.452193	0.240254		13.8068	10.0808
CONT-02m_m67_001	WASP-05m_m67_002		24	16		7994.49	5556.76		0.671243	0.744544		10.6174	12.3488
CONT-02m_m67_001	WASP-05m_m67_002		20	40		8868.43	4453.74		0.392889	0.581008		11.7781	9.89757
CONT-02m_m67_001	WASP-05m_m67_002		16	16		9949.15	3976.5		0.449823	0.536769		13.2134	8.837
CONT-02m_m67_001	WASP-05m_m67_002		276	204		13459.8	6403.35		1.07526	0.993897		17.8759	14.2302
CONT-02m_m67_001	WASP-05m_m67_002		20	20		10009.4	3851.89		0.482129	0.511681		13.2934	8.56008
CONT-02m_m67_001	WASP-05m_m67_002		36	24		8979.21	4661.47		0.362407	0.51078		11.9252	10.3592
CONT-02m_m67_001	WASP-05m_m67_002		24	28		10429.9	5154.88		0.437818	0.486925		13.8518	11.4557
CONT-02m_m67_001	WASP-05m_m67_002		16	20		7520.6	4728.65		0.199228	0.258593		9.98807	10.5085
CONT-02m_m67_001	WASP-05m_m67_002		92	16		12971.6	4132.79		0.747973	0.614806		17.2275	9.18433
CONT-02m_m67_001	WASP-05m_m67_002		28	24		8876.22	3895.74		0.509912	0.495171		11.7885	8.65754
CONT-02m_m67_001	WASP-05m_m67_002		48	16		11088.9	4541.82		0.830872	0.116011		14.7271	10.0933
CONT-02m_m67_001	WASP-05m_m67_002		80	48		12598.7	5163.45		0.84959	0.46469		16.7322	11.4748
CONT-02m_m67_001	WASP-05m_m67_002		24	16		9442.51	4347.12		0.331405	0.594204		12.5406	9.66063
CONT-02m_m67_001	WASP-05m_m67_002		80	16		9297.83	4536.12		0.785245	0.586078		12.3484	10.0806
CONT-02m_m67_001	WASP-05m_m67_002		20	132		7010.31	5017.78		0.275078	1.12668		9.31036	11.151
CONT-02m_m67_001	WASP-05m_m67_002		20	16		9984.18	4662.35		0.790909	0.270059		13.2599	10.3612
CONT-02m_m67_001	WASP-05m_m67_002		72	36		18718.8	4712.94		0.959017	0.913047		24.8603	10.4736
CONT-02m_m67_001	WASP-05m_m67_002		60	20		7841.26	4828.28		0.659439	0.420159		10.4139	10.7299
CONT-02m_m67_001	WASP-05m_m67_002		28	24		10246	4258.83		0.395458	0.489079		13.6077	9.46442
CONT-02m_m67_001	WASP-05m_m67_002		60	68		14463.9	6761.93		0.875764	0.507687		19.2094	15.0271
CONT-02m_m67_001	WASP-05m_m67_002		68	20		10564.1	5322.54		0.824692	0.27593		14.0301	11.8283
CONT-02m_m67_001	WASP-05m_m67_002		24	20		10345.9	4631.12		0.337235	0.706387		13.7403	10.2918
CONT-02m_m67_001	WASP-05m_m67_002		44	36		11114.6	4012.29		0.714719	0.616984		14.7613	8.91655
CONT-02m_m67_001	WASP-05m_m67_002		16	28		7719.36	5219.74		0.716143	0.410749		10.2521	11.5999
CONT-02m_m67_001	WASP-05m_m67_002		28	24		14327.3	5004.37		0.634036	0.470517		19.028	11.1213
CONT-02m_m67_001	WASP-05m_m67_002		32	24		7327.9	4691.73		0.658476	0.832485		9.73215	10.4265
CONT-02m_m67_001	WASP-05m_m67_002		36	68		10341.9	5995.35		0.389332	0.610565		13.735	13.3235
CONT-02m_m67_001	WASP-05m_m67_002		32	24		14701.4	3900.36		0.785282	0.418297		19.5248	8.66781
CONT-02m_m67_001	WASP-05m_m67_003		16	364		8592.37	8388.28		0.259918	1.15277		11.4115	21.8839
CONT-02m_m67_001	WASP-05m_m67_003		16	40		8658.14	3956.32		0.618007	0.739714		11.4988	10.3215
CONT-02m_m67_001	WASP-05m_m67_003		16	24		9717.73	3943.59		0.273907	0.579944		12.9061	10.2883
CONT-02m_m67_001	WASP-05m_m67_003		16	44		14691.7	4342.1		0.520729	0.754073		19.512	11.3279
CONT-02m_m67_001	WASP-05m_m67_003		44	44		10747.5	3714.03		0.721685	0.449544		14.2737	9.68942
CONT-02m_m67_002	WASP-05m_m67_003		44	28		8761.36	4053.16		0.847158	0.197282		22.622	10.5742
CONT-02m_m67_002	WASP-05m_m67_003		140	32		6667.48	4174.51		1.38906	0.761765		17.2155	10.8907
CONT-02m_m67_002	WASP-05m_m67_003		16	24		4128.52	4375.07		0.453299	0.596556		10.6599	11.414
CONT-02m_m67_002	WASP-05m_m67_003		16	28		4332.4	4343.58		0.263994	0.871442		11.1863	11.3318
CONT-02m_m67_002	WASP-05m_m67_003		40	32		3485.2	4330.22		0.934585	0.612687		8.99886	11.297
CONT-02m_m67_002	WASP-05m_m67_003		184	24		4902.4	4559.86		0.806989	0.412325		12.6581	11.8961
CONT-02m_m67_002	WASP-05m_m67_003		28	16		4208.36	5381.89		0.575461	0.586037		10.866	14.0406
CONT-02m_m67_002	WASP-05m_m67_003		44	32		6866.62	4869.88		0.616947	0.540328		17.7297	12.7049
CONT-02m_m67_002	WASP-05m_m67_003		112	16		5083	5322.68		1.46956	0.308467		13.1244	13.8861
CONT-02m_m67_002	WASP-05m_m67_003		20	32		3967.68	4815.37		0.288711	0.411812		10.2446	12.5627
CONT-02m_m67_002	WASP-05m_m67_003		16	20		4189.86	4808.56		0.283253	0.827944		10.8183	12.5449
CONT-02m_m67_002	WASP-05m_m67_003		72	16		6796.29	5561.15		1.02627	0.169111		17.5481	14.5083
CONT-02m_m67_002	WASP-05m_m67_003		188	20		6565.19	4927.06		1.39729	0.433266		16.9514	12.854
CONT-02m_m67_002	WASP-05m_m67_003		36	20		6936.78	5142.87		0.679278	0.312512		17.9109	13.4171
CONT-02m_m67_002	WASP-05m_m67_003		52	192		5321.19	5987.15		0.686817	1.05635		13.7394	15.6197
CONT-02m_m67_002	WASP-05m_m67_003		96	24		5405.91	5886.66		0.810798	0.829763		13.9582	15.3575
CONT-02m_m67_002	WASP-05m_m67_003		28	16		4851.58	5078.57		0.601106	0.256922		12.5269	13.2493
CONT-02m_m67_002	WASP-05m_m67_003		16	28		5310.56	5574.4		0.393716	0.303916		13.712	14.5428
CONT-02m_m67_002	WASP-05m_m67_003		20	32		3878.55	5400.68		1.16308	0.46515		10.0145	14.0897
CONT-02m_m67_002	WASP-05m_m67_003		32	20		4308.1	3572		0.406036	0.407463		11.1236	9.31886
CONT-02m_m67_002	WASP-05m_m67_003		44	96		6030.52	6347.25		0.650572	0.825721		15.5709	16.5591
CONT-02m_m67_002	WASP-05m_m67_003		16	68		3650.48	3744.06		0.4555	0.598473		9.4256	9.76775
CONT-02m_m67_002			152			6701.44			1.45209			17.3032
CONT-02m_m67_002			28			4573.95			0.531445			11.81
CONT-02m_m67_002			40			4079.79			0.447008			10.5341
CONT-02m_m67_002			100			6041.93			1.12207			15.6004
CONT-02m_m67_002			56			4552.47			0.788942			11.7546
CONT-02m_m67_002			56			6168.04			1.13725			15.926
CONT-02m_m67_003			20			10394.4			0.281194			10.6865
CONT-02m_m67_003			40			11281.5			0.370847			11.5985
CONT-02m_m67_003			96			17447			1.05681			17.9372
CONT-02m_m67_003			76			18617.4			1.54303			19.1405
CONT-02m_m67_003			36			16208.4			1.0761			16.6638
CONT-02m_m67_003			44			15836.4			0.658826			16.2814
CONT-02m_m67_003			44			17937.4			0.747977			18.4414
CONT-02m_m67_003			20			9195.29			0.104095			9.45365
CONT-02m_m67_003			24			10499.9			0.521055			10.795
CONT-02m_m67_003			32			15669.8			0.67393			16.11
CONT-02m_m67_003			56			14619.3			0.625838			15.03
CONT-02m_m67_003			68			19939.9			0.995168			20.5001
CONT-02m_m67_003			72			13047.1			0.67609			13.4137
CONT-02m_m67_003			80			19588.4			1.10304			20.1388
CONT-02m_m67_003			20			9095.88			0.679979			9.35145
CONT-02m_m67_003			20			12421.4			0.494684			12.7704
CONT-02m_m67_003			20			9865.65			0.562861			10.1428
CONT-02m_m67_003			112			19248.7			1.28011			19.7896
CONT-02m_m67_003			52			12220.2			0.584182			12.5635
CONT-02m_m67_003			16			11818.5			0.370568			12.1505
CONT-02m_m67_003			32			14033.8			1.2355			14.4281
CONT-02m_m67_003			32			13636			0.441795			14.0191
CONT-02m_m67_003			68			18846			1.09907			19.3755
CONT-02m_m67_003			68			14860.9			0.902185			15.2785
CONT-02m_m67_003			48			20691.4			0.919562			21.2727
CONT-02m_m67_003			24			12843.8			0.464859			13.2047
CONT-02m_m67_003			32			12782.5			0.776083			13.1416
CONT-02m_m67_003			16			10850			1.00217			11.1549
CONT-02m_m67_003			56			18364.2			0.767732			18.8802
CONT-02m_m67_003			68			19413.8			0.699196			19.9593
CONT-02m_m67_003			88			13957.5			0.995791			14.3497
CONT-02m_m67_003			20			13465.3			0.451915			13.8436
CONT-02m_m67_003			32			16209.4			0.37127			16.6648
CONT-02m_m67_003			20			15330.9			0.574865			15.7617
CONT-02m_m67_003			48			14147.4			0.893424			14.5449
CONT-03m_m67_001			20			4799.34			0.320035			9.93028
CONT-03m_m67_001			24			4999.28			0.920632			10.344
CONT-03m_m67_001			56			5836.82			0.536172			12.0769
CONT-03m_m67_001			20			4640.91			0.261093			9.60248
CONT-03m_m67_001			152			8869.25			1.34951			18.3513
CONT-03m_m67_001			28			5074.48			0.876254			10.4996
CONT-03m_m67_001			28			6446.36			0.846114			13.3381
CONT-03m_m67_001			28			5998.4			0.894797			12.4113
CONT-03m_m67_001			24			5890.64			0.357393			12.1883
CONT-03m_m67_001			20			4420.16			0.311997			9.14572
CONT-03m_m67_001			24			6557.64			0.255489			13.5684
CONT-03m_m67_001			140			8729.59			1.16239			18.0623
CONT-03m_m67_001			28			6528.51			0.696617			13.5081
CONT-03m_m67_001			84			7890.47			0.987008			16.3261
CONT-03m_m67_001			28			5317.47			0.855541			11.0023
CONT-03m_m67_001			20			4244.67			0.708898			8.78261
CONT-03m_m67_001			32			5327.8			0.659144			11.0237
CONT-03m_m67_001			48			5721.25			0.899363			11.8378
CONT-03m_m67_001			20			4907.15			0.625272			10.1534
CONT-03m_m67_001			52			5114.47			0.547235			10.5823
CONT-03m_m67_001			20			5004.43			0.735965			10.3546
CONT-03m_m67_001			36			6178.45			1.04015			12.7838
CONT-03m_m67_001			20			5370.27			0.426615			11.1116
CONT-03m_m67_001			28			4163.54			0.297453			8.61475
CONT-03m_m67_001			48			5972.17			0.830371			12.357
CONT-03m_m67_001			48			5636.62			0.598966			11.6627
CONT-03m_m67_001			60			6332.11			0.715045			13.1017
CONT-03m_m67_001			80			9179.18			1.0279			18.9926
CONT-03m_m67_001			92			6756.3			1.20629			13.9794
CONT-03m_m67_001			24			6091.97			0.471667			12.6049
CONT-03m_m67_001			80			5525.11			0.78945			11.432
CONT-03m_m67_001			56			6960.9			1.11585			14.4028
CONT-03m_m67_001			44			12578.9			0.679636			26.027
CONT-03m_m67_001			268			10612.6			0.864565			21.9584
CONT-03m_m67_001			28			5738.5			0.523706			11.8735
CONT-03m_m67_001			48			6067.63			0.783974			12.5545
CONT-03m_m67_001			20			5128.26			0.208356			10.6109
CONT-03m_m67_001			24			5308.61			0.365892			10.984
CONT-03m_m67_001			92			8827.22			1.12239			18.2643
CONT-03m_m67_001			48			5962.01			0.685043			12.336
CONT-03m_m67_001			20			5682.96			0.516515			11.7586
CONT-03m_m67_001			104			11116.7			0.710865			23.0015
CONT-03m_m67_001			16			5541.21			0.411587			11.4653
CONT-03m_m67_001			24			5067			0.68144			10.4841
CONT-03m_m67_001			20			5168.9			0.283802			10.6949
CONT-03m_m67_001			20			4189.33			0.258334			8.66812
CONT-03m_m67_001			84			7362.81			1.3373			15.2343
CONT-03m_m67_001			40			6141.58			0.532458			12.7075
CONT-03m_m67_001			84			7171.9			1.4423			14.8393
CONT-03m_m67_001			28			4982.87			0.392809			10.31
CONT-03m_m67_001			36			7122.24			0.465447			14.7366
CONT-03m_m67_001			16			4324.44			0.824874			8.94766
CONT-03m_m67_001			48			5106.8			0.703099			10.5664
CONT-03m_m67_001			20			4544.32			0.417289			9.40262
CONT-03m_m67_001			40			6939.25			0.903666			14.358
CONT-03m_m67_001			20			5642.93			0.556912			11.6757
CONT-03m_m67_001			36			7720.98			0.70716			15.9754
CONT-03m_m67_001			24			6081.75			0.653623			12.5837
CONT-03m_m67_001			16			7884.74			0.686223			16.3143
CONT-03m_m67_002			44			1999.98			1.44927			15.3478
CONT-03m_m67_002			28			1922.18			0.368443			14.7507
CONT-03m_m67_002			28			1536.56			0.658701			11.7915
CONT-03m_m67_002			16			1446.95			0.511233			11.1038
CONT-03m_m67_002			24			1390.18			0.363372			10.6682
CONT-03m_m67_002			24			1471.45			0.729851			11.2918
CONT-03m_m67_002			52			1683.21			1.04291			12.9169
CONT-03m_m67_002			16			1382.19			0.367468			10.6069
CONT-03m_m67_002			32			1934			1.33643			14.8414
CONT-03m_m67_002			16			1863.59			0.293381			14.3011
CONT-03m_m67_002			48			1432.69			0.758817			10.9944
CONT-03m_m67_002			40			1622.51			1.5861			12.4511
CONT-03m_m67_002			16			1761.84			0.553384			13.5203
CONT-03m_m67_002			24			1340.39			0.905187			10.2861
CONT-03m_m67_002			44			1722.57			0.952922			13.219
CONT-03m_m67_002			36			1677.59			0.688284			12.8737
CONT-03m_m67_002			24			1467.99			0.651034			11.2653
CONT-03m_m67_002			52			1700.09			0.745925			13.0465
CONT-03m_m67_002			28			1595.34			0.581949			12.2426
CONT-03m_m67_002			16			1370.32			0.323137			10.5158
CONT-03m_m67_002			20			1263.83			0.954572			9.69863
CONT-03m_m67_002			28			1483.11			0.614487			11.3814
CONT-03m_m67_002			36			1627.55			0.784224			12.4898
CONT-03m_m67_002			40			2213.53			0.785943			16.9865
CONT-03m_m67_002			16			1766.01			0.530713			13.5523
CONT-03m_m67_002			24			1956.81			0.449267			15.0165
CONT-03m_m67_002			20			1455.59			1.07434			11.1701
CONT-03m_m67_002			16			1639.07			0.35751			12.5782
CONT-03m_m67_002			20			1466.27			0.608931			11.2521
CONT-03m_m67_002			16			1649.79			1.03304			12.6605
CONT-03m_m67_002			16			2070.21			0.431374			15.8867
CONT-03m_m67_002			32			1753.61			0.513248			13.4571
CONT-03m_m67_002			24			2092.26			0.614867			16.056
CONT-03m_m67_002			16			1653.23			1.16533			12.6868
CONT-03m_m67_003			124			5599.6			1.23408			15.8858
CONT-03m_m67_003			56			6695.31			0.972099			18.9943
CONT-03m_m67_003			104			5342.31			1.28045			15.1559
CONT-03m_m67_003			56			4234.71			0.924675			12.0137
CONT-03m_m67_003			136			9601.99			1.21289			27.2404
CONT-03m_m67_003			36			3809.89			1.06529			10.8085
CONT-03m_m67_003			16			5556.35			0.661593			15.7631
CONT-03m_m67_003			20			3424.65			0.516933			9.71558
CONT-03m_m67_003			44			3338.52			0.729098			9.47124
CONT-03m_m67_003			20			2996.01			0.956855			8.49955
CONT-03m_m67_003			16			3845.39			0.484025			10.9092
CONT-03m_m67_003			60			4912.22			0.585536			13.9357
CONT-03m_m67_003			28			3572.25			0.556495			10.1343
CONT-03m_m67_003			24			3143.12			0.338484			8.9169
CONT-03m_m67_003			60			5174.99			0.988235			14.6812
CONT-03m_m67_003			108			3461.08			0.907635			9.81894
CONT-03m_m67_003			32			4686.48			0.757601			13.2953
CONT-03m_m67_003			16			3612.04			0.204038			10.2472
CONT-03m_m67_003			24			4232.83			0.800814			12.0084
CONT-03m_m67_003			60			4179.08			0.970781			11.8559
CONT-03m_m67_003			32			3754.69			0.875131			10.6519
CONT-03m_m67_003			52			4285.43			0.893789			12.1576
CONT-03m_m67_003			16			3618.4			1.14904			10.2652
CONT-03m_m67_003			20			3876.98			0.731185			10.9988
CONT-03m_m67_003			28			3544.71			1.23512			10.0562
CONT-03m_m67_003			48			3988.1			1.04811			11.3141
CONT-03m_m67_003			16			3694.58			0.81421			10.4814
CONT-03m_m67_003			88			5493.05			1.10287			15.5836
CONT-03m_m67_003			40			4034.31			0.74155			11.4452
CONT-03m_m67_003			60			4028.54			1.07462			11.4288
CONT-03m_m67_003			68			5381.13			0.89378			15.266
CONT-03m_m67_003			24			3579.05			0.797855			10.1536
CONT-03m_m67_003			36			3123.98			0.628			8.8626
CONT-03m_m67_003			76			7087.28			0.862332			20.1063
CONT-03m_m67_003			16			3531.37			0.230834			10.0183
CONT-03m_m67_003			80			4087.27			0.951269			11.5954
CONT-03m_m67_003			44			5082.24			0.794974			14.4181
CONT-03m_m67_003			40			4588.72			0.766747			13.018
CONT-03m_m67_003			20			3094.46			0.458247			8.77886
CONT-03m_m67_003			16			3178.93			0.491023			9.01848
CONT-03m_m67_003			40			3993.62			0.634368			11.3297
CONT-03m_m67_003			24			3644.45			0.475948			10.3391
CONT-03m_m67_003			20			4433.53			0.320557			12.5777
CONT-03m_m67_003			28			5796.88			0.503381			16.4455
CONT-03m_m67_003			72			8022.85			0.924621			22.7605
CONT-03m_m67_003			24			3862.49			0.440211			10.9577
CONT-03m_m67_003			16			3795.47			0.153882			10.7676
CONT-03m_m67_003			92			5096.3			1.42592			14.458
CONT-03m_m67_003			24			4839.41			0.890204			13.7292
CONT-03m_m67_003			60			4112.22			0.900701			11.6662
CONT-03m_m67_003			16			4036.69			0.469592			11.4519
CONT-03m_m67_003			56			4268.88			0.808932			12.1106
CONT-03m_m67_003			100			4685.3			0.766313			13.292
CONT-03m_m67_003			36			3518.01			0.686576			9.98044
CONT-03m_m67_003			36			3725.95			0.731932			10.5704
CONT-03m_m67_003			32			3802.82			0.784888			10.7884
CONT-03m_m67_003			72			4959.98			0.822993			14.0712
CONT-03m_m67_003			36			4505.41			1.45715			12.7816
CONT-03m_m67_003			44			5465.81			0.622291			15.5063
CONT-03m_m67_003			76			10947.5			1.24144			31.0577
CONT-03m_m67_003			24			3538.86			0.546273			10.0396
CONT-03m_m67_003			16			3820.13			0.38323			10.8376
CONT-03m_m67_003			88			7054.4			1.01875			20.013
CONT-03m_m67_003			24			3785.19			1.0045			10.7384
CONT-03m_m67_003			360			6365.34			1.42017			18.0582
CONT-03m_m67_003			28			2919.03			0.711333			8.28116
CONT-03m_m67_003			48			2936.48			0.604157			8.33066
CONT-03m_m67_003			40			4751.9			0.795049			13.4809
CONT-03m_m67_003			28			5310.87			0.505225			15.0667
CONT-03m_m67_003			52			4721.54			1.04851			13.3948
CONT-03m_m67_003			20			4740.29			0.42965			13.448
CONT-03m_m67_003			24			3660.57			0.567462			10.3849
CONT-03m_m67_003			28			6059.8			0.771289			17.1914
CONT-03m_m67_003			16			4430.17			0.727657			12.5682
CONT-03m_m67_003			40			4316.27			0.925114			12.2451
CONT-03m_m67_003			328			14026.6			0.988113			39.7929
CONT-03m_m67_003			16			3283.14			0.217776			9.31411
CONT-03m_m67_003			60			7439.82			0.781855			21.1065
CONT-03m_m67_003			28			3262.13			0.270271			9.25451
CONT-03m_m67_003			16			4346.14			0.670768			12.3298
CONT-03m_m67_003			40			3318.63			0.626062			9.4148
CONT-03m_m67_003			28			3266.01			0.677823			9.26553
CONT-03m_m67_003			16			5030.03			0.440563			14.27
CONT-03m_m67_003			28			3869.63			0.73946			10.978
CONT-03m_m67_003			28			6080.11			0.562436			17.249
CONT-03m_m67_003			64			4089.26			0.981541			11.601
CONT-03m_m67_003			16			4163.51			0.255764			11.8117
CONT-04m_m67_001			52			5983.35			0.861631			14.0189
CONT-04m_m67_001			24			6421.37			0.933815			15.0452
CONT-04m_m67_001			24			4717.39			0.592627			11.0528
CONT-04m_m67_001			16			4274.05			0.374821			10.014
CONT-04m_m67_001			36			5351.88			0.618232			12.5394
CONT-04m_m67_001			92			7100.85			1.16643			16.6372
CONT-04m_m67_001			16			4222.05			0.51502			9.89218
CONT-04m_m67_001			28			6123.48			0.678225			14.3472
CONT-04m_m67_001			16			3427.23			0.628441			8.02994
CONT-04m_m67_001			76			6415.01			1.07033			15.0303
CONT-04m_m67_001			20			4232.36			0.431096			9.91635
CONT-04m_m67_001			116			8388.79			1.07853			19.6548
CONT-04m_m67_001			20			5250.95			0.451776			12.3029
CONT-04m_m67_001			16			5076.12			0.606065			11.8933
CONT-04m_m67_001			28			6737.38			0.651554			15.7856
CONT-04m_m67_001			40			7084.73			0.846091			16.5994
CONT-04m_m67_001			20			4618.69			0.291471			10.8215
CONT-04m_m67_001			20			3813.43			0.492875			8.93481
CONT-04m_m67_001			40			5475.67			0.580187			12.8294
CONT-04m_m67_001			36			4044.34			0.614464			9.47583
CONT-04m_m67_001			32			6443.84			0.851071			15.0978
CONT-04m_m67_002			96			20343.3			1.26476			28.8219
CONT-04m_m67_002			16			6375.05			0.231513			9.03201
CONT-04m_m67_002			44			6800.21			0.695755			9.63436
CONT-04m_m67_002			16			7024.5			0.211236			9.95212
CONT-04m_m67_002			40			6769.54			0.528515			9.59091
CONT-04m_m67_002			16			6785.96			0.293089			9.61417
CONT-04m_m67_002			24			6400.47			0.475827			9.06801
CONT-04m_m67_002			48			9214.12			0.668116			13.0543
CONT-04m_m67_002			52			9919.34			0.499089			14.0535
CONT-04m_m67_002			44			8412.39			0.534996			11.9185
CONT-04m_m67_002			80			8649.83			0.662138			12.2549
CONT-04m_m67_002			20			6708.22			0.319468			9.50403
CONT-04m_m67_002			52			8740.23			0.922381			12.3829
CONT-04m_m67_002			16			6056.75			0.342937			8.58105
CONT-04m_m67_002			128			8831.02			0.774118			12.5116
CONT-04m_m67_002			32			6650.71			0.497634			9.42255
CONT-04m_m67_002			28			6355.46			0.372825			9.00425
CONT-04m_m67_002			44			8986.35			1.1227			12.7316
CONT-04m_m67_002			84			10117.6			1.07285			14.3344
CONT-04m_m67_002			64			11616.9			1.04837			16.4585
CONT-04m_m67_002			120			13106.3			0.728513			18.5687
CONT-04m_m67_002			20			7525.61			0.484266			10.6621
CONT-04m_m67_002			16			6254.91			0.406897			8.86179
CONT-04m_m67_002			20			6467.44			0.389709			9.1629
CONT-04m_m67_002			32			10123.3			0.480983			14.3424
CONT-04m_m67_002			24			7795.72			0.267448			11.0448
CONT-04m_m67_002			28			5974.77			0.57158			8.46489
CONT-04m_m67_002			92			9599.57			1.08568			13.6004
CONT-04m_m67_002			32			5787.14			0.380014			8.19907
CONT-04m_m67_002			36			8659.78			0.79429			12.269
CONT-04m_m67_002			20			7025.37			0.695015			9.95336
CONT-04m_m67_002			32			9179.93			0.963824			13.0059
CONT-04m_m67_002			48			9609.72			0.943069			13.6148
CONT-04m_m67_002			20			6116.86			0.414587			8.6662
CONT-04m_m67_002			44			14341.5			1.2774			20.3186
CONT-04m_m67_002			40			10716.9			0.505092			15.1834
CONT-04m_m67_002			20			5737.59			0.609552			8.12886
CONT-04m_m67_002			28			6078.98			0.419505			8.61254
CONT-04m_m67_002			24			10178.8			0.576419			14.4211
CONT-04m_m67_002			24			8054.37			0.684217			11.4112
CONT-04m_m67_002			16			8502.25			0.566762			12.0458
CONT-04m_m67_002			28			6265.03			0.824501			8.87613
CONT-04m_m67_002			24			9753.12			0.836763			13.818
CONT-04m_m67_002			20			10558.8			0.702629			14.9594
CONT-04m_m67_002			20			6941.03			0.47658			9.83387
CONT-04m_m67_002			28			6552.14			0.479369			9.2829
CONT-04m_m67_002			88			8336.36			0.925119			11.8107
CONT-05m_m67_001			16			5297.82			0.484855			8.58891
CONT-05m_m67_001			16			7149.73			0.46558			11.5912
CONT-05m_m67_001			84			8738.48			0.863618			14.167
CONT-05m_m67_001			56			5930.5			0.669646			9.61461
CONT-05m_m67_001			16			6533.95			0.278184			10.5929
CONT-05m_m67_001			20			6264.74			0.401687			10.1565
CONT-05m_m67_001			32			5327.82			0.559511			8.63754
CONT-05m_m67_001			40			7376.4			0.556097			11.9587
CONT-05m_m67_001			80			8022.68			0.778643			13.0065
CONT-05m_m67_001			24			6725.67			0.58847			10.9038
CONT-05m_m67_001			20			5571.5			0.317867			9.0326
CONT-05m_m67_001			84			11915.3			1.33276			19.3173
CONT-05m_m67_001			24			5746.67			0.669669			9.31659
CONT-05m_m67_001			28			6650.4			0.703292			10.7817
CONT-05m_m67_001			56			7574.95			0.877172			12.2806
CONT-05m_m67_001			56			6526.04			0.713136			10.5801
CONT-05m_m67_001			20			6166.97			0.300899			9.99799
CONT-05m_m67_001			120			10947.5			1.19115			17.7483
CONT-05m_m67_001			52			6808.94			0.786443			11.0388
CONT-05m_m67_001			232			13081.8			2.10206			21.2084
CONT-05m_m67_001			20			4908.17			0.149278			7.9572
CONT-05m_m67_001			20			5899.15			0.587977			9.5638
CONT-05m_m67_001			16			5601.92			0.509792			9.08191
CONT-05m_m67_001			28			5200.13			0.25964			8.43052
CONT-05m_m67_001			28			7239.45			0.580826			11.7367
CONT-05m_m67_001			36			6461.02			0.864805			10.4747
CONT-05m_m67_001			20			5467.03			0.406427			8.86324
CONT-05m_m67_001			20			6568.69			0.495213			10.6493
CONT-05m_m67_001			156			12601.7			0.946995			20.4301
CONT-05m_m67_001			52			8019.88			0.916765			13.0019
CONT-05m_m67_001			36			7013.47			0.831589			11.3703
CONT-05m_m67_001			32			5593.64			1.24532			9.0685
CONT-05m_m67_001			16			4841.62			0.258962			7.84931
CONT-05m_m67_001			88			7260.49			0.98699			11.7708
CONT-05m_m67_001			16			5843.38			0.368185			9.47337
CONT-05m_m67_001			36			5619.47			0.479793			9.11038
CONT-05m_m67_001			116			9107.77			0.81739			14.7657
CONT-05m_m67_001			56			6654.58			0.495222			10.7885
CONT-05m_m67_001			44			6838.78			0.494201			11.0871
CONT-05m_m67_001			24			5762			0.575886			9.34144
CONT-05m_m67_001			24			4691.62			0.345356			7.60612
CONT-05m_m67_001			20			6017.24			0.682544			9.75525
CONT-05m_m67_001			68			5868.39			0.641163			9.51393
CONT-05m_m67_001			16			5849.65			0.121678			9.48355
CONT-05m_m67_001			24			5018.07			0.326137			8.13536
CONT-05m_m67_001			20			5851.66			1.31531			9.4868
CONT-05m_m67_001			16			5957.33			0.234324			9.65812
CONT-05m_m67_001			20			6575.56			0.287118			10.6604
CONT-05m_m67_001			16			5721.72			0.342998			9.27615
CONT-05m_m67_001			16			5134.16			0.323998			8.32358
CONT-05m_m67_001			20			5939.34			0.510078			9.62895
CONT-05m_m67_001			28			5716.46			0.558001			9.26761
CONT-05m_m67_001			16			6071.72			0.493612			9.84357
CONT-05m_m67_001			16			6179.92			0.376961			10.019
CONT-05m_m67_001			56			7219.46			0.929437			11.7043
CONT-05m_m67_001			48			7146.72			0.795038			11.5864
CONT-05m_m67_001			56			8462.58			0.702399			13.7197
CONT-05m_m67_001			44			7340.37			1.12736			11.9003
CONT-05m_m67_001			68			8963.21			0.871227			14.5313
CONT-05m_m67_001			16			4895.9			0.354566			7.9373
CONT-05m_m67_001			48			11925.2			0.97296			19.3332
CONT-05m_m67_001			28			5519.38			0.701673			8.94811
CONT-05m_m67_001			36			6083.85			0.78991			9.86322
CONT-05m_m67_001			32			6353.17			0.658706			10.2998
CONT-05m_m67_001			16			5760.6			0.466623			9.33917
CONT-05m_m67_001			20			6838.44			0.684373			11.0866
CONT-05m_m67_001			84			6382.06			1.07953			10.3467
CONT-05m_m67_002			56			5750.28			1.03103			11.5217
CONT-05m_m67_002			32			5721.1			0.785304			11.4632
CONT-05m_m67_002			32			7733.79			1.00984			15.496
CONT-05m_m67_002			40			5990.65			0.673199			12.0033
CONT-05m_m67_002			20			4503.18			0.805183			9.02289
CONT-05m_m67_002			56			7876.92			0.771022			15.7827
CONT-05m_m67_002			100			9067.01			1.05224			18.1673
CONT-05m_m67_002			48			10719			0.810415			21.4774
CONT-05m_m67_002			48			8385.81			0.418907			16.8024
CONT-05m_m67_002			44			6151.28			0.600063			12.3251
CONT-05m_m67_002			20			7704.13			0.526938			15.4365
CONT-05m_m67_002			48			5537.25			0.625919			11.0948
CONT-05m_m67_002			40			5971.9			0.729687			11.9657
CONT-05m_m67_002			16			4874.47			0.219887			9.76683
CONT-05m_m67_002			144			14910.6			2.03204			29.876
CONT-05m_m67_002			44			7918.76			0.635231			15.8666
CONT-05m_m67_002			40			7537.11			0.817238			15.1019
CONT-05m_m67_002			40			6828.56			0.714748			13.6822
CONT-05m_m67_002			64			6848.26			0.760601			13.7217
CONT-05m_m67_002			92			8590.66			0.829114			17.2129
CONT-05m_m67_002			28			6448.8			0.642553			12.9213
CONT-05m_m67_002			20			8621.76			0.343878			17.2752
CONT-05m_m67_002			16			4937.91			0.376127			9.89394
CONT-05m_m67_002			32			7431.03			0.798568			14.8893
CONT-05m_m67_002			24			7033.42			0.460317			14.0927
CONT-05m_m67_002			16			7363.07			0.455748			14.7532
CONT-05m_m67_002			16			6723.45			0.403391			13.4716
CONT-05m_m67_002			28			4864.32			0.904455			9.74649
CONT-05m_m67_002			40			7159.81			0.659764			14.3459
CONT-05m_m67_002			16			5515.89			0.105134			11.052
CONT-06m_m67_002			332			12304.7			1.4524			19.0687
CONT-06m_m67_002			84			10751.1			0.925258			16.6612
CONT-06m_m67_002			112			11027.9			1.16171			17.09
CONT-06m_m67_002			40			8909.49			0.883259			13.8071
CONT-06m_m67_002			40			6952.76			0.717741			10.7748
CONT-06m_m67_002			20			5955.67			0.332015			9.22956
CONT-06m_m67_002			100			17219.5			0.944674			26.6852
CONT-06m_m67_002			92			10205			1.46768			15.8148
CONT-06m_m67_002			16			6366.45			0.281889			9.86616
CONT-06m_m67_002			64			7196.81			0.722487			11.153
CONT-06m_m67_002			36			7829.31			0.657224			12.1332
CONT-06m_m67_002			32			2411.23			1.43225			3.73672
CONT-06m_m67_002			36			2658.15			1.80022			4.11936
CONT-06m_m67_002			20			6808.65			0.437006			10.5514
CONT-06m_m67_002			92			9293.24			0.868656			14.4018
CONT-06m_m67_002			16			6658.23			0.477638			10.3183
CONT-06m_m67_002			20			7398.47			0.342491			11.4655
CONT-06m_m67_002			120			14390.1			1.134			22.3005
CONT-06m_m67_002			32			5621.67			0.555326			8.71196
CONT-06m_m67_002			28			6176.62			0.643004			9.57197
CONT-06m_m67_002			20			6479.11			0.444533			10.0408
CONT-06m_m67_003			56			8994.29			0.698913			13.6167
CONT-06m_m67_003			120			10376			1.15312			15.7085
CONT-06m_m67_003			52			10590.8			0.486253			16.0337
CONT-06m_m67_003			16			9488.27			0.278311			14.3646
CONT-06m_m67_003			80			10749.4			0.826033			16.2739
CONT-06m_m67_003			64			11676.7			0.969631			17.6776
CONT-06m_m67_003			24			8526.35			0.236111			12.9083
CONT-06m_m67_003			16			9236.32			0.302812			13.9831
CONT-06m_m67_003			28			10094.1			0.401476			15.2818
CONT-06m_m67_003			16			7807.07			0.337232			11.8193
CONT-06m_m67_003			60			7173.75			0.585136			10.8606
CONT-06m_m67_003			60			7040.97			0.834543			10.6595
CONT-06m_m67_003			24			6548.86			0.770729			9.91452
CONT-06m_m67_003			32			7138.42			0.515917			10.8071
CONT-06m_m67_003			100			7487.01			0.722522			11.3348
CONT-06m_m67_003			184			9620.02			0.852948			14.564

## Sheet: PT-NMJ-LiveFormulae
File	NMJ	CellArea	GMAMean	GMACoV	Frames	MovieDuration(s)	Duration	Intensity	NormIntRange	Patch/Area	Patch/Area/100frames	patch/um^2/s	patch/10um2/min	Pct4-28	Pct32-100	>100
CONT-01m_m67_001_Reg.tif	CONT-01m_m67_001	114.116	266.311	0.61829	88	352	42.3562	3373.94	0.767069	0.639702	0.726935	0.00181734	1.0904	56.1644	36.9863	6.84932
CONT-01m_m67_002_Reg.tif	CONT-01m_m67_002	22.2756	433.7	0.47196	91	364	43.1746	6153.19	0.742479	2.82821	3.10792	0.00776981	4.66189	50.7937	44.4444	4.7619
CONT-01m_m67_003_Reg.tif	CONT-01m_m67_003	81.4044	514.101	0.81535	91	364	54.9565	7557.45	0.835891	0.56508	0.620967	0.00155242	0.93145	32.6087	56.5217	10.8696
CONT-02m_m67_001_Reg.tif	CONT-02m_m67_001	112.196	752.958	0.6534	91	364	41.7561	9847	0.589615	0.730867	0.80315	0.00200788	1.20473	53.6585	41.4634	4.87805
CONT-02m_m67_002_Reg.tif	CONT-02m_m67_002	24.1244	387.294	0.61728	91	364	60.4286	5277.34	0.774225	1.16065	1.27544	0.0031886	1.91316	35.7143	46.4286	17.8571
CONT-02m_m67_003_Reg.tif	CONT-02m_m67_003	74.7733	972.67	0.67539	91	364	45.7143	14696.7	0.742908	0.468081	0.514375	0.00128594	0.771563	31.4286	65.7143	2.85714
CONT-03m_m67_001_Reg.tif	CONT-03m_m67_001	117.013	483.304	0.61637	91	364	46.3729	6245.8	0.695694	0.504216	0.554084	0.00138521	0.831125	52.5424	40.678	6.77966
CONT-03m_m67_002_Reg.tif	CONT-03m_m67_002	42.7556	130.311	0.65181	91	364	27.4118	1659.19	0.728989	0.795218	0.873866	0.00218467	1.3108	67.6471	32.3529	0
CONT-03m_m67_003_Reg.tif	CONT-03m_m67_003	104.107	352.49	0.6821	91	364	49.0575	4627.26	0.76346	0.835681	0.918331	0.00229583	1.3775	45.977	47.1264	6.89655
CONT-04m_m67_001_Reg.tif	CONT-04m_m67_001	24.5867	426.806	0.68233	91	364	36.5714	5485.85	0.682608	0.854121	0.938595	0.00234649	1.40789	57.1429	38.0952	4.7619
CONT-04m_m67_002_Reg.tif	CONT-04m_m67_002	63.9822	705.829	0.62231	91	364	40.1702	8425.56	0.638896	0.734579	0.80723	0.00201807	1.21084	51.0638	44.6809	4.25532
CONT-05m_m67_001_Reg.tif	CONT-05m_m67_001	97.6533	616.821	0.67082	91	364	41.9104	6781.25	0.650822	0.686101	0.753957	0.00188489	1.13093	53.7313	40.2985	5.97015
CONT-05m_m67_002_Reg.tif	CONT-05m_m67_002	33.4044	499.084	0.53453	91	364	42	7157.34	0.699951	0.898084	0.986906	0.00246726	1.48036	36.6667	60	3.33333
CONT-06m_m67_002_Reg-2.tif	CONT-06m_m67_002	25.2978	645.282	0.02299	87	348	64.381	8219.72	0.841974	0.830112	0.954152	0.00238538	1.43123	33.3333	52.381	14.2857
CONT-06m_m67_003_Reg.tif	CONT-06m_m67_003	19.2889	660.533	0.64723	86	344	58.25	8909.27	0.62323	0.829493	0.964527	0.00241132	1.44679	37.5	50	12.5
WASp-01m_m67_001_Reg.tif	WASp-01m_m67_001	8.21333	825.768	0.55762	91	364	22.6667	7868.31	0.43856	0.36526	0.401384	0.00100346	0.602077	66.6667	33.3333	0
WASp-01m_m67_002_Reg.tif	WASp-01m_m67_002	13.8667	757.928	0.54171	91	364	138.667	8070.04	0.693899	0.216346	0.237743	0.000594357	0.356614	33.3333	33.3333	33.3333
WASp-01m_m67_003_Reg.tif	WASp-01m_m67_003	20.64	768.583	0.49209	91	364	46.1538	10035.5	0.587457	0.629845	0.692137	0.00173034	1.03821	38.4615	53.8462	7.69231
WASp-02m_m67_001_Reg.tif	WASp-02m_m67_001	57.0844	878.765	0.5909	91	364	40.6667	12405.7	0.44983	0.315322	0.346508	0.00086627	0.519762	61.1111	33.3333	5.55556
WASp-02m_m67_002_Reg.tif	WASp-02m_m67_002	22.7733	1054.14	0.02476	91	364	34.1818	12984.4	0.483445	0.483021	0.530792	0.00132698	0.796189	63.6364	36.3636	0
WASp-02m_m67_003_Reg-2.tif	WASp-02m_m67_003	26.4533	1511.97	0.42418	79	316	24.5714	17451.4	0.33694	0.264617	0.334958	0.000837395	0.502437	85.7143	14.2857	0
WASP-03f_m67_001_Reg.tif	WASP-03f_m67_001	43.7867	1140.29	0.01666	91	364	81.6	16798.2	0.657017	0.45676	0.501934	0.00125484	0.752901	35	40	25
WASP-03f_m67_002_Reg.tif	WASP-03f_m67_002	56.5689	1251.04	0.51911	91	364	68.6087	16601.4	0.592598	0.813168	0.893591	0.00223398	1.34039	41.3043	43.4783	15.2174
WASP-04m_m67_001_Reg.tif	WASP-04m_m67_001	46.0267	952.448	0.01226	91	364	43.2	12234.9	0.58901	0.543163	0.596883	0.00149221	0.895324	48	44	8
WASP-04m_m67_002_Reg.tif	WASP-04m_m67_002	47.9111	1350.9	0.0105	91	364	70.9677	17051.4	0.62431	0.647032	0.711024	0.00177756	1.06654	29.0323	48.3871	22.5806
WASP-04m_m67_003_Reg.tif	WASP-04m_m67_003	33.0667	1454.44	0.01439	91	364	50.2222	16837.7	0.540061	0.816532	0.897288	0.00224322	1.34593	48.1481	44.4444	7.40741
WASP-05m_m67_001_Reg.tif	WASP-05m_m67_001	34.2578	485.635	0.62859	91	364	59.3043	6288.23	0.570376	0.67138	0.737781	0.00184445	1.10667	52.1739	30.4348	17.3913
WASP-05m_m67_002_Reg.tif	WASP-05m_m67_002	18.6489	449.983	0.44608	91	364	38.625	4781.68	0.553063	1.71592	1.88563	0.00471407	2.82844	68.75	25	6.25
WASP-05m_m67_003_Reg.tif	WASP-05m_m67_003	40.1244	383.308	0.47862	91	364	49.3333	4911.15	0.572642	0.672907	0.739458	0.00184864	1.10919	55.5556	37.037	7.40741
								0.602077
								0.356614
								1.03821
								0.519762
								0.796189
								0.502437
								0.752901
								1.34039
								0.895324
								1.06654
								1.34593
								1.10667
								2.82844
								1.10919

## Sheet: PT-ByNMJ-Values
						530.597	929.49		0.598811	0.339819											0.718521	0.549229	0.235611				0.986696	0.679079			0.311764		46.3982	51.9205		46.4781	36.9484		7.12372	11.1311
NMJ	NMJ		CellArea	CellArea		GMAMean	GMAMean		GMACoV	GMACoV		Duration	Duration		NormPatchIntensity	NormPatchIntensity		Intensity	Intensity		NormIntRange	NormIntRange		Patch/Area	Patch/Area		Patch/Area/100frames	Patch/Area/100frames					Pct4-28	Pct4-28		Pct32-100	Pct32-100		>100	>100
Cont	WASpRNAi		Cont	WASpRNAi		Cont	WASp		Cont	WASpRNAi		Cont	WASpRNAi		Cont	WASpRNAi		Cont	WASpRNAi		Cont	WASpRNAi		Cont	WASpRNAi		Cont	WASpRNAi					Cont	WASpRNAi		Cont	WASpRNAi		Cont	WASpRNAi
CONT-01m_m67_001	WASp-01m_m67_001		114.116	8.21333		266.371	669.547		0.61829	0.55762		42.3562	22.6667		12.6663	11.7517		3373.94	7868.31		0.767069	0.43856		0.639702	0.36526		0.726935	0.401384					56.1644	66.6667		36.9863	33.3333		6.84932	0
CONT-01m_m67_002	WASp-01m_m67_002		22.2756	13.8667		544.158	700.881		0.47196	0.54171		43.1746	138.667		11.3077	11.5141		6153.19	8070.04		0.742479	0.693899		2.82821	0.216346		3.10792	0.237743					50.7937	33.3333		44.4444	33.3333		4.7619	33.3333
CONT-01m_m67_003	WASp-01m_m67_003		81.4044	20.64		512.031	766.189		0.81535	0.49209		54.9565	46.1538		14.7597	13.0979		7557.45	10035.5		0.835891	0.587457		0.56508	0.629845		0.620967	0.692137					32.6087	38.4615		56.5217	53.8462		10.8696	7.69231
CONT-02m_m67_001	WASp-02m_m67_001		112.196	57.0844		746.346	874.65		0.6534	0.5909		41.7561	40.6667		13.1936	14.1836		9847	12405.7		0.589615	0.44983		0.730867	0.315322		0.80315	0.346508					53.6585	61.1111		41.4634	33.3333		4.87805	5.55556
CONT-02m_m67_002	WASp-02m_m67_002		24.1244	22.7733		379.902	1054.14		0.61728	0.02476		60.4286	34.1818		13.8913	12.3175		5277.34	12984.4		0.774225	0.483445		1.16065	0.483021		1.27544	0.530792					35.7143	63.6364		46.4286	36.3636		17.8571	0
CONT-02m_m67_003	WASp-02m_m67_003		74.7733	26.4533		981.915	1510.89		0.67539	0.42418		45.7143	24.5714		14.9674	11.5504		14696.7	17451.4		0.742908	0.33694		0.468081	0.264617		0.514375	0.334958					31.4286	85.7143		65.7143	14.2857		2.85714	0
CONT-03m_m67_001	WASP-03f_m67_001		117.013	43.7867		483.201	1140.29		0.61637	0.01666		46.3729	81.6		12.9259	14.7316		6245.8	16798.2		0.695694	0.657017		0.504216	0.45676		0.554084	0.501934					52.5424	35		40.678	40		6.77966	25
CONT-03m_m67_002	WASP-03f_m67_002		42.7556	56.5689		130.655	1249.3		0.65181	0.51911		27.4118	68.6087		12.699	13.2886		1659.19	16601.4		0.728989	0.592598		0.795218	0.813168		0.873866	0.893591					67.6471	41.3043		32.3529	43.4783		0	15.2174
CONT-03m_m67_003	WASP-04m_m67_001		104.107	46.0267		352.207	952.448		0.6821	0.01226		49.0575	43.2		13.1379	12.8457		4627.26	12234.9		0.76346	0.58901		0.835681	0.543163		0.918331	0.596883					45.977	48		47.1264	44		6.89655	8
CONT-04m_m67_001	WASP-04m_m67_002		24.5867	47.9111		413.078	1350.9		0.68233	0.0105		36.5714	70.9677		13.2804	12.6223		5485.85	17051.4		0.682608	0.62431		0.854121	0.647032		0.938595	0.711024					57.1429	29.0323		38.0952	48.3871		4.7619	22.5806
CONT-04m_m67_002	WASP-04m_m67_003		63.9822	33.0667		704.578	1454.44		0.62231	0.01439		40.1702	50.2222		11.9583	11.5768		8425.56	16837.7		0.638896	0.540061		0.734579	0.816532		0.80723	0.897288					51.0638	48.1481		44.6809	44.4444		4.25532	7.40741
CONT-05m_m67_001	WASP-05m_m67_001		97.6533	34.2578		597.205	483.609		0.67082	0.62859		41.9104	59.3043		11.355	13.0027		6781.25	6288.23		0.650822	0.570376		0.686101	0.67138		0.753957	0.737781					53.7313	52.1739		40.2985	30.4348		5.97015	17.3913
CONT-05m_m67_002	WASP-05m_m67_002		33.4044	18.6489		563.308	419.925		0.53453	0.44608		42	38.625		12.7059	11.387		7157.34	4781.68		0.699951	0.553063		0.898084	1.71592		0.986906	1.88563					36.6667	68.75		60	25		3.33333	6.25
CONT-06m_m67_002	WASP-05m_m67_003		25.2978	40.1244		638.715	385.663		0.02299	0.47862		64.381	49.3333		12.8692	12.7343		8219.72	4911.15		0.841974	0.572642		0.830112	0.672907		0.954152	0.739458					33.3333	55.5556		52.381	37.037		14.2857	7.40741
CONT-06m_m67_003			19.2889			645.282			0.64723			58.25			13.8068			8909.27			0.62323			0.829493			0.964527						37.5			50			12.5
						656.566

## Sheet: WholeNMJData-CalcPT-Thresholds
				Threshold/AFU:	0.395378
File	NMJ	CellArea	GMAMean	GMACoV	PT Threshold	MovieDuration
CONT-01m_m67_001_Reg.tif	CONT-01m_m67_001	114.116	266.311	0.61829	105.293	88
CONT-01m_m67_002_Reg.tif	CONT-01m_m67_002	22.2756	433.7	0.47196	171.475	91
CONT-01m_m67_003_Reg.tif	CONT-01m_m67_003	81.4044	514.101	0.81535	203.264	91
CONT-02m_m67_001_Reg.tif	CONT-02m_m67_001	112.196	752.958	0.6534	297.703	91
CONT-02m_m67_002_Reg.tif	CONT-02m_m67_002	24.1244	387.294	0.61728	153.127	91
CONT-02m_m67_003_Reg.tif	CONT-02m_m67_003	74.7733	972.67	0.67539	384.572	91
CONT-03m_m67_001_Reg.tif	CONT-03m_m67_001	117.013	483.304	0.61637	191.087	91
CONT-03m_m67_002_Reg.tif	CONT-03m_m67_002	42.7556	130.311	0.65181	51.5219	91
CONT-03m_m67_003_Reg.tif	CONT-03m_m67_003	104.107	352.49	0.6821	139.367	91
CONT-04m_m67_001_Reg.tif	CONT-04m_m67_001	24.5867	426.806	0.68233	168.75	91
CONT-04m_m67_002_Reg.tif	CONT-04m_m67_002	63.9822	705.829	0.62231	279.069	91
CONT-05m_m67_001_Reg.tif	CONT-05m_m67_001	97.6533	616.821	0.67082	243.877	91
CONT-05m_m67_002_Reg.tif	CONT-05m_m67_002	33.4044	499.084	0.53453	197.327	91
CONT-06m_m67_002_Reg-2.tif	CONT-06m_m67_002	25.2978	645.282	0.02299	255.13	87
CONT-06m_m67_003_Reg.tif	CONT-06m_m67_003	19.2889	660.533	0.64723	261.16	86
WASp-01m_m67_001_Reg.tif	WASp-01m_m67_001	8.21333	825.768	0.55762	326.49	91
WASp-01m_m67_002_Reg.tif	WASp-01m_m67_002	13.8667	757.928	0.54171	299.668	91
WASp-01m_m67_003_Reg.tif	WASp-01m_m67_003	20.64	768.583	0.49209	303.881	91
WASp-02m_m67_001_Reg.tif	WASp-02m_m67_001	57.0844	878.765	0.5909	347.444	91
WASp-02m_m67_002_Reg.tif	WASp-02m_m67_002	22.7733	1054.14	0.02476	416.784	91
WASp-02m_m67_003_Reg-2.tif	WASp-02m_m67_003	26.4533	1511.97	0.42418	597.8	79
WASP-03f_m67_001_Reg.tif	WASP-03f_m67_001	43.7867	1140.29	0.01666	450.844	91
WASP-03f_m67_002_Reg.tif	WASP-03f_m67_002	56.5689	1251.04	0.51911	494.634	91
WASP-04m_m67_001_Reg.tif	WASP-04m_m67_001	46.0267	952.448	0.01226	376.576	91
WASP-04m_m67_002_Reg.tif	WASP-04m_m67_002	47.9111	1350.9	0.0105	534.114	91
WASP-04m_m67_003_Reg.tif	WASP-04m_m67_003	33.0667	1454.44	0.01439	575.053	91
WASP-05m_m67_001_Reg.tif	WASP-05m_m67_001	34.2578	485.635	0.62859	192.009	91
WASP-05m_m67_002_Reg.tif	WASP-05m_m67_002	18.6489	449.983	0.44608	177.913	91
WASP-05m_m67_003_Reg.tif	WASP-05m_m67_003	40.1244	383.308	0.47862	151.552	91

## Sheet: Regressions
	File	NMJ	CellArea	GMAMean	GMACoV	MovieDuration	Duration	Intensity	NormIntRange	Patch/Area	Patch/Area/100frames	Pct4-28	Pct32-100	>100
	CONT-01m_m67_001_Reg.tif	CONT-01m_m67_001	114.116	266.311	0.61829	88	42.3562	3373.94	0.767069	0.639702	0.726935	56.1644	36.9863	6.84932
	CONT-01m_m67_002_Reg.tif	CONT-01m_m67_002	22.2756	433.7	0.47196	91	43.1746	6153.19	0.742479	2.82821	3.10792	50.7937	44.4444	4.7619
	CONT-01m_m67_003_Reg.tif	CONT-01m_m67_003	81.4044	514.101	0.81535	91	54.9565	7557.45	0.835891	0.56508	0.620967	32.6087	56.5217	10.8696
	CONT-02m_m67_001_Reg.tif	CONT-02m_m67_001	112.196	752.958	0.6534	91	41.7561	9847	0.589615	0.730867	0.80315	53.6585	41.4634	4.87805
	CONT-02m_m67_002_Reg.tif	CONT-02m_m67_002	24.1244	387.294	0.61728	91	60.4286	5277.34	0.774225	1.16065	1.27544	35.7143	46.4286	17.8571
	CONT-02m_m67_003_Reg.tif	CONT-02m_m67_003	74.7733	972.67	0.67539	91	45.7143	14696.7	0.742908	0.468081	0.514375	31.4286	65.7143	2.85714
	CONT-03m_m67_001_Reg.tif	CONT-03m_m67_001	117.013	483.304	0.61637	91	46.3729	6245.8	0.695694	0.504216	0.554084	52.5424	40.678	6.77966
	CONT-03m_m67_002_Reg.tif	CONT-03m_m67_002	42.7556	130.311	0.65181	91	27.4118	1659.19	0.728989	0.795218	0.873866	67.6471	32.3529	0
	CONT-03m_m67_003_Reg.tif	CONT-03m_m67_003	104.107	352.49	0.6821	91	49.0575	4627.26	0.76346	0.835681	0.918331	45.977	47.1264	6.89655
	CONT-04m_m67_001_Reg.tif	CONT-04m_m67_001	24.5867	426.806	0.68233	91	36.5714	5485.85	0.682608	0.854121	0.938595	57.1429	38.0952	4.7619
	CONT-04m_m67_002_Reg.tif	CONT-04m_m67_002	63.9822	705.829	0.62231	91	40.1702	8425.56	0.638896	0.734579	0.80723	51.0638	44.6809	4.25532
	CONT-05m_m67_001_Reg.tif	CONT-05m_m67_001	97.6533	616.821	0.67082	91	41.9104	6781.25	0.650822	0.686101	0.753957	53.7313	40.2985	5.97015
	CONT-05m_m67_002_Reg.tif	CONT-05m_m67_002	33.4044	499.084	0.53453	91	42	7157.34	0.699951	0.898084	0.986906	36.6667	60	3.33333
	CONT-06m_m67_002_Reg-2.tif	CONT-06m_m67_002	25.2978	645.282	0.02299	87	64.381	8219.72	0.841974	0.830112	0.954152	33.3333	52.381	14.2857
	CONT-06m_m67_003_Reg.tif	CONT-06m_m67_003	19.2889	660.533	0.64723	86	58.25	8909.27	0.62323	0.829493	0.964527	37.5	50	12.5
	WASp-01m_m67_001_Reg.tif	WASp-01m_m67_001	8.21333	825.768	0.55762	91	22.6667	7868.31	0.43856	0.36526	0.401384	66.6667	33.3333	0
	WASp-01m_m67_002_Reg.tif	WASp-01m_m67_002	13.8667	757.928	0.54171	91	138.667	8070.04	0.693899	0.216346	0.237743	33.3333	33.3333	33.3333
	WASp-01m_m67_003_Reg.tif	WASp-01m_m67_003	20.64	768.583	0.49209	91	46.1538	10035.5	0.587457	0.629845	0.692137	38.4615	53.8462	7.69231
	WASp-02m_m67_001_Reg.tif	WASp-02m_m67_001	57.0844	878.765	0.5909	91	40.6667	12405.7	0.44983	0.315322	0.346508	61.1111	33.3333	5.55556
	WASp-02m_m67_002_Reg.tif	WASp-02m_m67_002	22.7733	1054.14	0.02476	91	34.1818	12984.4	0.483445	0.483021	0.530792	63.6364	36.3636	0
	WASp-02m_m67_003_Reg-2.tif	WASp-02m_m67_003	26.4533	1511.97	0.42418	79	24.5714	17451.4	0.33694	0.264617	0.334958	85.7143	14.2857	0
	WASP-03f_m67_001_Reg.tif	WASP-03f_m67_001	43.7867	1140.29	0.01666	91	81.6	16798.2	0.657017	0.45676	0.501934	35	40	25
	WASP-03f_m67_002_Reg.tif	WASP-03f_m67_002	56.5689	1251.04	0.51911	91	68.6087	16601.4	0.592598	0.813168	0.893591	41.3043	43.4783	15.2174
	WASP-04m_m67_001_Reg.tif	WASP-04m_m67_001	46.0267	952.448	0.01226	91	43.2	12234.9	0.58901	0.543163	0.596883	48	44	8
	WASP-04m_m67_002_Reg.tif	WASP-04m_m67_002	47.9111	1350.9	0.0105	91	70.9677	17051.4	0.62431	0.647032	0.711024	29.0323	48.3871	22.5806
	WASP-04m_m67_003_Reg.tif	WASP-04m_m67_003	33.0667	1454.44	0.01439	91	50.2222	16837.7	0.540061	0.816532	0.897288	48.1481	44.4444	7.40741
	WASP-05m_m67_001_Reg.tif	WASP-05m_m67_001	34.2578	485.635	0.62859	91	59.3043	6288.23	0.570376	0.67138	0.737781	52.1739	30.4348	17.3913
	WASP-05m_m67_002_Reg.tif	WASP-05m_m67_002	18.6489	449.983	0.44608	91	38.625	4781.68	0.553063	1.71592	1.88563	68.75	25	6.25
	WASP-05m_m67_003_Reg.tif	WASP-05m_m67_003	40.1244	383.308	0.47862	91	49.3333	4911.15	0.572642	0.672907	0.739458	55.5556	37.037	7.40741
			NMJMean	Duration						GMAMean	NormIntRange
			266.311	42.3562						266.311	0.767069
			433.7	43.1746						433.7	0.742479
			514.101	54.9565						514.101	0.835891
			752.958	41.7561						752.958	0.589615
			387.294	60.4286						387.294	0.774225
			972.67	45.7143						972.67	0.742908
			483.304	46.3729						483.304	0.695694
			130.311	27.4118						130.311	0.728989
			352.49	49.0575						352.49	0.76346
			426.806	36.5714						426.806	0.682608
			705.829	40.1702						705.829	0.638896
			616.821	41.9104						616.821	0.650822
			499.084	42						499.084	0.699951
			645.282	64.381						645.282	0.841974
			660.533	58.25						660.533	0.62323
			825.768	22.6667						825.768	0.43856
			757.928	138.667						757.928	0.693899
			768.583	46.1538						768.583	0.587457
			878.765	40.6667						878.765	0.44983
			1054.14	34.1818						1054.14	0.483445
			1511.97	24.5714						1511.97	0.33694
			1140.29	81.6						1140.29	0.657017
			1251.04	68.6087						1251.04	0.592598
			952.448	43.2						952.448	0.58901
			1350.9	70.9677						1350.9	0.62431
			1454.44	50.2222						1454.44	0.540061
			485.635	59.3043						485.635	0.570376
			449.983	38.625						449.983	0.553063
			383.308	49.3333						383.308	0.572642
