# Supplementary material for: An autoinhibitory clamp of actin assembly constrains and directs synaptic endocytosis
Source: eLife journal article supplement (doi:10.7554/elife.69597), 2021-07-29
Supplement: fig2-data1 [file Figure 2C-D_source data_Nwk-WASp-GMAcoloc.xlsx]

## Sheet: actin-Nwk
File	R no thresh	R above	M1-Thresh	M2-Thresh
cleaned_L1_m4_001#17_actinRFP_Nwk.txt	0.34	0.159	0.489	0.422
cleaned_L1_m4_002#18_actinRFP_Nwk.txt	0.3	0.165	0.524	0.416
cleaned_L1_m4_003#19_actinRFP_Nwk.txt	0.21	0.117	0.322	0.246
cleaned_L1_m4_004#20_actinRFP_Nwk.txt	0.4	0.171	0.525	0.391
cleaned_L1_m4_005#21_actinRFP_Nwk.txt	0.35	0.157	0.544	0.397
cleaned_L1_m4_006#22_actinRFP_Nwk.txt	0.34	0.177	0.49	0.414
cleaned_L2_m4_001#23_actinRFP_Nwk.txt	0.33	0.15	0.481	0.384
cleaned_L2_m4_002#24_actinRFP_Nwk.txt	0.41	0.173	0.598	0.474
cleaned_L2_m4_003#25_actinRFP_Nwk.txt	0.33	0.166	0.493	0.472
cleaned_L2_m4_004#26_actinRFP_Nwk.txt	0.36	0.18	0.602	0.481
cleaned_L2_m4_005#27_actinRFP_Nwk.txt	0.39	0.168	0.508	0.421
cleaned_L2_m4_006#28_actinRFP_Nwk.txt	0.23	0.135	0.305	0.347
cleaned_L3_m4_001#29_actinRFP_Nwk.txt	0.32	0.152	0.455	0.443
cleaned_L3_m4_002#30_actinRFP_Nwk.txt	0.34	0.152	0.416	0.41
cleaned_L3_m4_004#31_actinRFP_Nwk.txt	0.39	0.164	0.459	0.442
cleaned_L3_m4_005#32_actinRFP_Nwk.txt	0.28	0.119	0.285	0.369
cleaned_L3_m4_006#33_actinRFP_Nwk.txt	0.28	0.126	0.335	0.356
cleaned_L4_m4_001#34_actinRFP_Nwk.txt	0.33	0.16	0.485	0.424
cleaned_L4_m4_002#35_actinRFP_Nwk.txt	0.29	0.141	0.387	0.366
cleaned_L4_m4_003#36_actinRFP_Nwk.txt	0.32	0.146	0.423	0.377

## Sheet: GMA-WASp
File	R no thresh	R above	M1-Thresh	M2-Thresh
cleaned_L1_m4_001#1_GMA_MycWASp.txt	0.19	0.105	0.234	0.238
cleaned_L1_m4_002#2_GMA_MycWASp.txt	0.27	0.143	0.318	0.386
cleaned_L1_m4_004#3_GMA_MycWASp.txt	0.21	0.124	0.378	0.241
cleaned_L1_m4_005#4_GMA_MycWASp.txt	0.28	0.153	0.394	0.325
cleaned_L1_m4_006#5_GMA_MycWASp.txt	0.27	0.124	0.355	0.276
cleaned_L2_m4_001#6_GMA_MycWASp.txt	0.34	0.169	0.471	0.449
cleaned_L2_m4_002#7_GMA_MycWASp.txt	0.29	0.158	0.439	0.377
cleaned_L2_m4_003#8_GMA_MycWASp.txt	0.31	0.165	0.484	0.485
cleaned_L2_m4_004#9_GMA_MycWASp.txt	0.32	0.182	0.468	0.398
cleaned_L2_m4_005#10_GMA_MycWASp.txt	0.32	0.15	0.424	0.381
cleaned_L2_m4_006#11_GMA_MycWASp.txt	0.39	0.195	0.548	0.544
cleaned_L4_m4_001#12_GMA_MycWASp.txt	0.5	0.233	0.697	0.732
cleaned_L4_m4_002#13_GMA_MycWASp.txt	0.5	0.239	0.674	0.672
cleaned_L4_m4_003#14_GMA_MycWASp.txt	0.31	0.149	0.423	0.376

## Sheet: GMA-nwk
File	R no thresh	R above	M1-Thresh	M2-Thresh
cleaned_L1_m4_001#1_GMA_Nwk.txt	0.45	0.205	0.617	0.519
cleaned_L1_m4_002#2_GMA_Nwk.txt	0.41	0.201	0.654	0.549
cleaned_L1_m4_004#3_GMA_Nwk.txt	0.42	0.205	0.621	0.573
cleaned_L1_m4_005#4_GMA_Nwk.txt	0.42	0.194	0.623	0.529
cleaned_L1_m4_006#5_GMA_Nwk.txt	0.27	0.14	0.33	0.38
cleaned_L2_m4_001#6_GMA_Nwk.txt	0.36	0.179	0.584	0.5
cleaned_L2_m4_002#7_GMA_Nwk.txt	0.32	0.156	0.509	0.436
cleaned_L2_m4_003#8_GMA_Nwk.txt	0.28	0.148	0.54	0.486
cleaned_L2_m4_004#9_GMA_Nwk.txt	0.43	0.216	0.806	0.999
cleaned_L2_m4_005#10_GMA_Nwk.txt	0.37	0.178	0.51	0.467
cleaned_L2_m4_006#11_GMA_Nwk.txt	0.37	0.189	0.581	0.519
cleaned_L4_m4_001#12_GMA_Nwk.txt	0.34	0.179	0.599	0.562
cleaned_L4_m4_002#13_GMA_Nwk.txt	0.46	0.216	0.722	0.658
cleaned_L4_m4_003#14_GMA_Nwk.txt	0.36	0.183	0.57	0.522

## Sheet: WASp-Nwk
File	R no thresh	R above	M1-Thresh	M2-Thresh
cleaned_L1_m4_001#1_MycWASp_Nwk.txt	0.26	0.104	0.28	0.33
cleaned_L1_m4_002#2_MycWASp_Nwk.txt	0.32	0.145	0.411	0.375
cleaned_L1_m4_004#3_MycWASp_Nwk.txt	0.37	0.165	0.425	0.431
cleaned_L1_m4_005#4_MycWASp_Nwk.txt	0.31	0.148	0.434	0.384
cleaned_L1_m4_006#5_MycWASp_Nwk.txt	0.3	0.136	0.289	0.372
cleaned_L2_m4_001#6_MycWASp_Nwk.txt	0.35	0.154	0.448	0.418
cleaned_L2_m4_002#7_MycWASp_Nwk.txt	0.37	0.156	0.469	0.443
cleaned_L2_m4_003#8_MycWASp_Nwk.txt	0.32	0.15	0.456	0.426
cleaned_L2_m4_004#9_MycWASp_Nwk.txt	0.38	0.191	0.578	0.474
cleaned_L2_m4_005#10_MycWASp_Nwk.txt	0.34	0.163	0.426	0.421
cleaned_L2_m4_006#11_MycWASp_Nwk.txt	0.36	0.177	0.506	0.455
cleaned_L4_m4_001#12_MycWASp_Nwk.txt	0.4	0.193	0.598	0.551
cleaned_L4_m4_002#13_MycWASp_Nwk.txt	0.48	0.215	0.631	0.588
cleaned_L4_m4_003#14_MycWASp_Nwk.txt	0.36	0.164	0.433	0.44
