# Supplementary material for: An autoinhibitory clamp of actin assembly constrains and directs synaptic endocytosis
Source: eLife journal article supplement (doi:10.7554/elife.69597), 2021-07-29
Supplement: fig2-data1 [file Figure 2E-F_source data_Dap160-WASp-GMAcoloc.xlsx]

## Sheet: GMA-Dap160
File	R no thresh	R above	M1-Thresh	M2-Thresh
	GMA-Dap160	GMA-Dap160	GMA-Dap160	GMA-Dap160
cleaned_L1_m4_001#2_GMA_Dap160.txt	0.44	0.216	0.564	0.498
cleaned_L1_m4_002#3_GMA_Dap160.txt	0.5	0.235	0.691	0.711
cleaned_L1_m4_003#4_GMA_Dap160.txt	0.43	0.219	0.625	0.578
cleaned_L1_m4_004#5_GMA_Dap160.txt	0.38	0.174	0.412	0.412
cleaned_L2_m4_001#6_GMA_Dap160.txt	0.25	0.132	0.474	0.252
cleaned_L2_m4_002#7_GMA_Dap160.txt	0.42	0.182	0.518	0.461
cleaned_L2_m4_003#8_GMA_Dap160.txt	0.29	0.144	0.484	0.339
cleaned_L2_m4_004#9_GMA_Dap160.txt	0.23	0.163	0.501	0.323
cleaned_L3_m4_001#10_GMA_Dap160.txt	0.35	0.197	0.581	0.475
cleaned_L3_m4_002#11_GMA_Dap160.txt	0.35	0.174	0.579	0.425
cleaned_L3_m4_003#12_GMA_Dap160.txt	0.3	0.168	0.489	0.375
cleaned_L3_m4_004#13_GMA_Dap160.txt	0.35	0.184	0.497	0.475

## Sheet: GMA-WASp
File	R no thresh	R above	M1-Thresh	M2-Thresh
	GMA-WASp	GMA-WASp	GMA-WASp	GMA-WASp
cleaned_L1_m4_001#2_GMA_WASp.txt	0.44	0.204	0.611	0.558
cleaned_L1_m4_002#3_GMA_WASp.txt	0.53	0.254	0.706	0.775
cleaned_L1_m4_003#4_GMA_WASp.txt	0.55	0.26	0.866	1
cleaned_L1_m4_004#5_GMA_WASp.txt	0.31	0.162	0.402	0.382
cleaned_L2_m4_001#6_GMA_WASp.txt	0.31	0.181	0.537	0.434
cleaned_L2_m4_002#7_GMA_WASp.txt	0.38	0.172	0.474	0.451
cleaned_L2_m4_003#8_GMA_WASp.txt	0.37	0.183	0.555	0.525
cleaned_L2_m4_004#9_GMA_WASp.txt	0.31	0.181	0.547	0.412
cleaned_L3_m4_001#10_GMA_WASp.txt	0.31	0.197	0.549	0.51
cleaned_L3_m4_002#11_GMA_WASp.txt	0.35	0.181	0.614	0.561
cleaned_L3_m4_003#12_GMA_WASp.txt	0.31	0.169	0.567	0.475
cleaned_L3_m4_004#13_GMA_WASp.txt	0.35	0.173	0.488	0.459

## Sheet: WASp-Dap160
File	R no thresh	R above	M1-Thresh	M2-Thresh
	WASp-Dap160	WASp-Dap160	WASp-Dap160	WASp-Dap160
cleaned_L1_m4_001#2_WASp_Dap160.txt	0.52	0.214	0.596	0.565
cleaned_L1_m4_002#3_WASp_Dap160.txt	0.58	0.255	0.699	0.669
cleaned_L1_m4_003#4_WASp_Dap160.txt	0.61	0.266	0.748	0.753
cleaned_L1_m4_004#5_WASp_Dap160.txt	0.34	0.156	0.358	0.408
cleaned_L2_m4_001#6_WASp_Dap160.txt	0.25	0.131	0.345	0.284
cleaned_L2_m4_002#7_WASp_Dap160.txt	0.39	0.162	0.42	0.418
cleaned_L2_m4_003#8_WASp_Dap160.txt	0.26	0.144	0.283	0.367
cleaned_L2_m4_004#9_WASp_Dap160.txt	0.3	0.152	0.379	0.385
cleaned_L3_m4_001#10_WASp_Dap160.txt	0.39	0.18	0.452	0.442
cleaned_L3_m4_002#11_WASp_Dap160.txt	0.43	0.175	0.523	0.509
cleaned_L3_m4_003#12_WASp_Dap160.txt	0.39	0.185	0.515	0.481
cleaned_L3_m4_004#13_WASp_Dap160.txt	0.4	0.178	0.464	0.473
