# Supplementary material for: An autoinhibitory clamp of actin assembly constrains and directs synaptic endocytosis
Source: eLife journal article supplement (doi:10.7554/elife.69597), 2021-07-29
Supplement: fig3-data1 [file Figure 3- supplement 2D_source data_DapRNAi validation.xlsx]

## Sheet: Results
File		NwkMean	NwkMean	NwkCoV	NwkCoV	Dap160Mean	Dap160Mean	Dap160CoV	Dap160CoV									CellArea
		Control	dapRNAi	Control	dapRNAi	Control	dapRNAi	Control	dapRNAi
cleaned_ContRNAil2_001.tif	cleaned_dapRNAil1_002.tif	547.16	381.086	0.466	0.359	4198.94	297.856	0.627	0.335									560.692	432.198
cleaned_ContRNAil2_002.tif	cleaned_dapRNAil1_004.tif	872.121	425.12	0.335	0.355	7680.3	391.196	0.454	0.331									81.63	128.691
cleaned_ContRNAil2_003.tif	cleaned_dapRNAil1_005.tif	555.292	504.781	0.415	0.373	5678.95	426.248	0.595	0.325									381.383	391.556
cleaned_ContRNAil2_004.tif	cleaned_dapRNAil2_001.tif	898.697	450.871	0.442	0.333	8361.99	368.884	0.595	0.271									212.099	454.371
cleaned_ContRNAil3_001.tif	cleaned_dapRNAil2_002.tif	401.407	296.308	0.39	0.299	3730.79	173.32	0.55	0.287									280.938	243.803
cleaned_ContRNAil3_002.tif	cleaned_dapRNAil2_003.tif	570.311	455.333	0.441	0.416	5132	461.025	0.551	0.397									339.951	264.642
cleaned_ContRNAil3_003.tif	cleaned_dapRNAil2_004.tif	444.956	639.65	0.346	0.4	4928.09	553.72	0.519	0.325									668.494	181.185
cleaned_ContRNAil3_004.tif	cleaned_dapRNAil3_001.tif	679.906	489.621	0.485	0.371	8578.46	349.817	0.654	0.302									482.519	144.593
cleaned_Control1_003.tif	cleaned_dapRNAil3_002.tif	869.175	498.129	0.388	0.383	9339.7	450.096	0.485	0.316									130.074	388.198
cleaned_Control1_004.tif	cleaned_dapRNAil3_003.tif	820.957	559.034	0.482	0.439	8986.44	424.87	0.609	0.342									377.334	335.358
cleaned_Control1_005.tif	cleaned_dapRNAil3_004.tif	519.938	636.256	0.355	0.326	5853.13	409.618	0.45	0.289									223.012	202.025
