# Supplementary material for: An autoinhibitory clamp of actin assembly constrains and directs synaptic endocytosis
Source: eLife journal article supplement (doi:10.7554/elife.69597), 2021-07-29
Supplement: fig3-data1 [file Figure 3-supplement 1A_source data_DapPulldownOfSH3b.xlsx]

## Sheet: Sheet1
Need to Assign lanes!
Gel 1 quant				Gel 1 bg
Id	Raw Int. Intensity	Shape Area		Id	Raw Int. Intensity	Shape Area		Raw-bg	%Pellet	%pellet corrected
GST-P	248072	8.747		67	251121	8.747		-26.7219	-0.00225283
GST-S	268438	6.665		68	242426	8.747		11888.2
DapC-P	204490	6.665		69	244277	8.747		2293.64	0.278594	0.280847
DapC-S	243068	7.081		70	256373	8.747		5939.26
DapD-P	191341	6.665		71	248020	8.747		320.796	0.0374686	0.0397214
DapD-S	273578	7.469		72	246849	8.747		8240.93
DapCD-P	205219	6.665		73	264518	8.747		2403.02	0.267769	0.270022
DapCD-S	281208	8.044		74	247490	8.747		6571.2
DapABCD-P	220114	6.665		75	266997	8.747		4637.82	0.453713	0.455966
DapABCD-S	226421	6.665		76	244718	8.747		5584.11
Input	408913	6.033		77	249276	8.747		39391.8
				78	249911	8.747
				79	247074	8.747
				80	247387	8.747
				81	254012	8.747
				82	238806	8.747
				83	235419	8.747
				84	246527	8.747
				85	236608	8.747
Gel 2 quant				Gel 2 bg
Id	Raw Int. Intensity	Shape Area		Id	Raw Int. Intensity	Shape Area
GST-P	218176	8.094		41	298557	11.893		125.51	0.00620907
GST-S	545894	11.635		42	356863	11.893		20088.5
DapC-P	177323	4.022		43	365956	11.893		17258.5	0.409879	0.40367
DapC-S	378538	7.325		44	330912	11.893		24847.8
DapD-P	232731	8.618		45	346900	11.893		175.456	0.00824766	0.00203859
DapD-S	570005	11.893		46	317169	11.893		21098
DapCD-P	199137	5.027		47	324910	11.893		12783.7	0.405826	0.399617
DapCD-S	397758	8.733		48	303204	11.893		18716.8
DapABCD-P	328795	6.004		49	301268	11.893		27932.9	0.615127	0.608918
DapABCD-S	291140	6.571		50	309369	11.893		17477
Input	610637	10.773		51	292288	11.893		29852.4
				52	333139	11.893
				53	292842	11.893
				54	290746	11.893
				55	322173	11.893
Gel 3 quant				Gel 3 bg
Id	Raw Int. Intensity	Shape Area		Id	Raw Int. Intensity	Shape Area
GST-P	199695	6.478		11	305549	11.548		2235.91	0.0616636
GST-S	623266	9.954		12	358989	11.548		34023.9
DapC-P	284021	5.171		14	315714	11.548		26335	0.436469	0.374805
DapC-S	512443	8.187		15	361595	11.548		34001.5
DapD-P	230266	8.187		16	379419	11.548		-464.926	-0.0135688	-0.0752324
DapD-S	731220	11.548		17	363173	11.548		34729.3
DapCD-P	276899	5.516		18	314159	11.548		21608.5	0.442058	0.380394
DapCD-S	545622	9.767		19	325576	11.548		27273.1
DapABCD-P	457031	7.038		20	340582	11.548		36346.9	0.621898	0.560235
DapABCD-S	377531	7.448		22	307302	11.548		22098.2
Input	749648	10.988		23	304796	11.548		39633.5
				24	300245	11.548
				25	341238	11.548
				26	321482	11.548
				27	315451	11.548
				28	327383	11.548
