# Supplementary material for: An autoinhibitory clamp of actin assembly constrains and directs synaptic endocytosis
Source: eLife journal article supplement (doi:10.7554/elife.69597), 2021-07-29
Supplement: fig3-data1 [file Figure 3-supplement 1B_source data_DapPulldownOfFBAR.xlsx]

## Sheet: Sheet1
gel 1	Raw Int. Intensity	Shape Area	adjust. Int.	% pellet		Id	Raw Int. Intensity	Shape Area	avg.
gst p	161860	16.0873	70320.6	34.1403		9	99907	16.0873	91539.4
s	227194	16.0873	135655			10	95926	16.0873
total			205975
cd p	261197	16.0873	169658	56.3049		11	88356	16.0873
s	223201	16.0873	131662			12	86365	16.0873
total			301319
c p	231238	16.0873	139699	53.4095		13	93381	16.0873
s	213402	16.0873	121863			14	91145	16.0873
total			261561
d p	208642	16.0873	117103	45.0434		15	96877	16.0873
s	234414	16.0873	142875			16	74900	16.0873
total			259977
input	241711	16.0873	150172			17	96998	16.0873
gel 2	Raw Int. Intensity	Shape Area	adjusted int.	% pellet		Id	Raw Int. Intensity	Shape Area	average
gst p	127491	13.7891	12561.8	12.3461		9	96107	13.7891	114929
s	204114	13.7891	89184.8			10	159465	13.7891
total			101747
cd p	223911	13.7891	108982	49.8313		11	128022	13.7891
s	224649	13.7891	109720			12	93843	13.7891
total			218702
c p	262472	13.7891	147543	45.38		13	135479	13.7891
s	292514	13.7891	177585			14	97477	13.7891
total			325128
d p	200002	13.7891	85072.8	48.2549		15	141657	13.7891
s	206155	13.7891	91225.8			17	83598	13.7891
total			176299
input	200138	13.7891	85208.8			18	98715	13.7891
gel 3	Raw Int. Intensity	Shape Area	adjusted int.	% pellet		Id	Raw Int. Intensity	Shape Area	average
gst p	191053	15.283	53548.5	26.4089		9	103111	15.283	137504
s	286723	15.283	149219			10	204802	15.283
total			202767
cd p	221768	15.283	84263.5	46.7975		11	132430	15.283
s	233301	15.283	95796.5			12	162972	15.283
total			180060
c p	282351	15.283	144847	60.8629		13	158639	15.283
s	230646	15.283	93141.5			14	135868	15.283
total			237988
d p	218320	15.283	80815.5	48.641		16	84536	15.283
s	222836	15.283	85331.5			17	132929	15.283
total			166147
input	256467	15.283	118963			18	120099	15.283
						19	157749	15.283
						20	119414	15.283
