# Supplementary material for: An autoinhibitory clamp of actin assembly constrains and directs synaptic endocytosis
Source: eLife journal article supplement (doi:10.7554/elife.69597), 2021-07-29
Supplement: fig3-data1 [file Figure 3B-source data gel quantifications.xlsx]

## Sheet: Sheet1
g1	Raw Int. Intensity	Shape Area	norm. area	back. Sub	% pellet		Id	Raw Int. Intensity	Shape Area	average			cd1	Raw Int. Intensity	Shape Area	norm. for area	back. Sub.	% pellet		cd1 b	Raw Int. Intensity	Shape Area	average		c1	Raw Int. Intensity	Shape Area	norm. for area	back. Sub.	% pellet		c1b	Raw Int. Intensity	Shape Area	average		Id	Raw Int. Intensity	Shape Area	norm. for area	back. Sub.	% pellet		Id	Raw Int. Intensity	Shape Area	average
gst p	347499	4	868748	245156	22.0011		11	661343	10	623591			gst p	77179	5	138922	33162.7	14.0538		11	108567	9	105759		gst p	100512	6	268032	102504	15.4673		79	194152	16	165528		50 p	48979	5	78366.4	28762.4	13.6974		11	64716	8	49604
s	1044908	7	1.49273e+06	869135			12	589141	10				s	308566	9	308566	202807			12	104630	9			s	635021	14	725738	560210			80	183200	16			s	173119	6	230825	181221			12	53101	8
total				1.11429e+06									total				235969			13	88162	9			total				662715			81	177716	16			total				209984			13	56299	8
50 p	988381	6	1.6473e+06	1.02371e+06	67.3957		13	644490	10				50 p	175165	6	262748	156988	55.2833		14	85800	9			50 p	144611	6	385629	220102	29.4436		82	162446	16			100 p	47450	6	63266.7	13662.6	9.36953		14	64453	8
s	559418	5	1118836	495245			14	639060	10				s	181021	7	232741	126982			15	96956	9			s	476412	11	692963	527435			83	184701	16			s	159041	7	181761	132157			15	39778	8
total				1.51896e+06									total				283970			16	109626	9			total				747537			84	196801	16			total				145820			16	58175	8
100 p	651913	6	1.08652e+06	462930	29.9338		15	602525	10				100 p	195593	6	293390	187630	60.5834		17	167030	9			100 p	176578	6	470875	305347	35.2956		85	200974	16			200 p	55165	5	88264	38660	12.2983		17	46572	8
s	1195024	7	1.70718e+06	1.08359e+06			16	411045	10				s	151890	6	227835	122076			18	75457	9			s	725294	16	725294	559766			86	163918	16			s	243972	6	325296	275692			18	47595	8
total				1.54652e+06									total				309706			19	126538	9			total				865113			87	142586	16			total				314352			19	61811	8
200 p	536690	5	1073380	449789	35.3675		17	700333	10				200 p	185544	6	278316	172557	72.122		20	99347	9			200 p	382197	7	873593	708065	55.618		88	153215	16			400 p	54319	5	86910.4	37306.4	11.3636		20	43648	8
s	1156447	8	1.44556e+06	821968			18	673731	10				s	114973	6	172460	66700			21	81367	9			s	639231	14	730550	565022			89	178409	16			s	212871	5	340594	290990			21	65837	8
total				1.27176e+06									total				239257			22	90379	9			total				1.27309e+06			90	158640	16			total				328296			22	42300	8
400 p	380763	5	761526	137935	10.7517		19	629663	10				400 p	223297	6	334946	229186	81.7922		23	186591	9			400 p	256135	5	819632	654104	71.8125		91	147612	16			gst p	46670	5	74672	25068	9.62062		23	46607	8
s	1768566	10	1768566	1.14497e+06			20	569988	10				s	121939	7	156779	51019.2			24	130344	9			s	184745	7	422274	256746			93	175497	16			s	285101	8	285101	235497			25	44649	8
total				1.28291e+06									total				280205			25	85115	9			total				910851			94	172198	16			total				260565			26	40261	8
input	1868650	8	2.33581e+06	1.71222e+06			21	738184	10				input	201318	6	301977	196218			26	98701	9			input	236386	6	630363	464835			95	132629	16			input	294792	6	393056	343452			27	38131	8
																				27	82816	9										96	153193	16										28	43479	8
																				28	100509	9										97	149788	16										29	51137	8
																				29	91495	9										98	148574	16										30	41965	8
																																99	148130	16										31	43484	8
																																100	151705	16										32	47687	8
g2	Raw Int. Intensity	Shape Area	norm. area	back. Sub	% pellet		Id	Raw Int. Intensity	Shape Area				cd2	Raw Int. Intensity	Shape Area	norm. for area	back. Sub.	% pellet		cd2 b	Raw Int. Intensity	Shape Area	average		c2	Raw Int. Intensity	Shape Area	norm. for area	back. Sub.	% pellet		c2 b	Raw Int. Intensity	Shape Area	average		Id	Raw Int. Intensity	Shape Area	norm. for area	back. Sub.	% pellet		Id	Raw Int. Intensity	Shape Area	average
gst p	493372	4	1110087	517512	30.7633		81	573430	9	592575			gst p	113587	8	141984	4980.65	2.2137		41	126558	10	137003									45	112332	9	94708.1		gst p	47173	5	75476.8	29931.2	11.3956		44	66557	8	45545.6
s	1366788	7	1.7573e+06	1.16472e+06			82	871642	9				s	321313	9	357014	220011			42	109865	10			gst p	69996	5	125993	31284.7	5.61992		46	102062	9			s	278269	8	278269	232723			45	48573	8
total				1.68224e+06									total				224992			43	131044	10			s	620099	9	620099	525391			47	89837	9			total				262655			46	44768	8
50 p	1028707	6	1.54306e+06	950486	60.7142		83	592599	9				50 p	217814	6	363023	226020	62.421		44	186883	10			total				556676			48	89616	9			50 p	66189	7	75644.6	30098.9	15.2675		47	50867	8
s	805064	6	1207596	615021			84	614005	9				s	191151	7	273073	136070			45	126484	10			50 p	151747	5	273145	178437	27.0739		49	94320	9			s	186017	7	212591	167045			48	65829	8
total				1.56551e+06									total				362090			46	108959	10			s	447490	7	575344	480636			50	86834	9			total				197144			49	45580	8
100 p	838500	6	1257750	665175	38.6642		85	587791	9				100 p	159729	5	319458	182455	60.3837		47	178097	10			total				659073			51	79728	9			100 p	48786	5	78057.6	32512	11.5518		50	39539	8
s	1098528	6	1647792	1.05522e+06			86	594108	9				s	179695	7	256707	119704			48	100031	10			100 p	301513	6	452270	357561	34.1167		52	127294	9			s	257668	7	294478	248932			51	41698	8
total				1.72039e+06									total				302159			49	207177	10			s	610711	7	785200	690492			53	114332	9			total				281444			52	41661	8
200 p	509473	5	917051	324477	24.4675		87	666009	9				200 p	267296	7	381851	244848	78.4754		50	234820	10			total				1.04805e+06			54	94277	9			200 p	47286	5	75657.6	30112	11.9829		53	42175	8
s	1239975	7	1.59425e+06	1.00168e+06			88	408760	9				s	142913	7	204161	67158.3			51	112213	10			200 p	329532	8	370724	276015	32.2216		55	102909	9			s	233385	7	266726	221180			54	43435	8
total				1.32616e+06									total				312007			52	195092	10			s	600275	8	675309	580601			56	104706	9			total				251292			55	33616	8
400 p	466062	5	838912	246337	20.6203		89	554411	9				400 p	228046	6	380077	243074	67.5363		53	111169	10			total				856617			57	65705	9			400 p	48561	6	64748	19202.4	14.1567		56	34121	8
s	1712078	10	1.54087e+06	948295			90	434881	9				s	253845	10	253845	116842			54	132307	10			400 p	315299	6	472948	378240	67.3776		58	88851	9			s	141737	7	161985	116440			58	40189	8
total				1.19463e+06									total				359915			55	182899	10			s	185228	6	277842	183134			59	84654	9			total				135642			59	57880	8
input	2168769	9	2168769	1.57619e+06			91	639130	9				input	292644	6	487740	350737			56	116173	10			total				561374			60	105344	9			input	303028	7	346318	300772			60	49458	8
							92	574132	9											57	101734	10			input	269293	6	403940	309231			61	107806	9										61	40632	8
																				58	97182	10										62	94345	9										62	35949	8
																				59	100911	10										63	89482	9										63	42840	8
																				60	97902	10										64	98518	9
																				61	119565	10										65	75096	9
																																66	88936	9
																																67	81302	9
g3	Raw Int. Intensity	Shape Area	norm. area	back. Sub	% pellet		Id	Raw Int. Intensity	Shape Area				cd 3	Raw Int. Intensity	Shape Area	norm. for area	back. Sub.	% pellet		cd3 b	Raw Int. Intensity	Shape Area	average		c3	Raw Int. Intensity	Shape Area	norm. for area	back. Sub.	% pellet		c3 b	Raw Int. Intensity	Shape Area	average		Id	Raw Int. Intensity	Shape Area	norm. for area	back. Sub.	% pellet		Id	Raw Int. Intensity	Shape Area	average
gst p	508126	5	1016252	392661	25.4793		11	661343	10	623591			gst p	145718	6	218577	76780	25.4845		73	170021	9	141797		gst p	61185	6	91777.5	29818.5	7.32112		11	87886	9	61959		gst p	64175	4	144394	44953.4	18.8496		77	133948	9	99440.3
s	1417620	8	1772025	1.14843e+06			12	589141	10				s	366298	9	366298	224501			74	137596	9			s	439435	9	439435	377476			12	70980	9			s	227867	7	292972	193532			78	106992	9
total				1.54109e+06									total				301281			75	139747	9			total				407295			13	71583	9			total				238485			79	116835	9
50 p	800106	6	1333510	709919	44.6162		13	644490	10				50 p	181487	5	326677	184880	56.308		76	159890	9			50 p	159322	6	238983	177024	25.8912		14	73728	9			50 p	57189	4	128675	29234.9	13.9853		80	99204	9
s	1053389	7	1.50484e+06	881250			14	639060	10				s	253559	8	285254	143457			77	135644	9			s	568658	9	568658	506699			15	75743	9			s	217191	7	279246	179805			82	107222	9
total				1.59117e+06									total				328336			78	127196	9			total				683723			16	63343	9			total				209040			83	97398	9
100 p	696735	5	1393470	769879	38.0238		15	602525	10				100 p	216886	6	325329	183532	71.0063		79	127054	9			100 p	234125	6	351188	289229	38.6522		17	73705	9			100 p	73361	4	165062	65621.9	17.5346		84	107649	9
s	1314909	7	1.87844e+06	1.25485e+06			16	411045	10				s	192656	8	216738	74941			80	203238	9			s	521016	9	521016	459057			18	43299	9			s	317380	7	408060	308620			85	98107	9
total				2.02473e+06									total				258473			81	185126	9			total				748286			19	59719	9			total				374242			86	92448	9
200 p	637201	6	1.062e+06	438410	25.209		17	700333	10				200 p	186722	5	336100	194303	66.3654		83	140308	9			200 p	146078	6	219117	157158	42.2141		20	62124	9			200 p	77456	5	139421	39980.5	13.7857		87	87176	9
s	1346997	7	1.92428e+06	1.30069e+06			18	673731	10				s	160181	6	240272	98474.5			84	130919	9			s	184726	6	277089	215130			21	62882	9			s	349475	9	349475	250035			88	97457	9
total				1.7391e+06									total				292777			85	137393	9			total				372288			22	64204	9			total				290015			89	91802	9
400 p	374260	4	935650	312059	20.7009		19	629663	10				400 p	240557	6	360836	219038	79.369		86	146007	9			400 p	175025	6	262538	200579	61.5217		23	65758	9			400 p	72515	5	130527	31086.7	16.8571		90	72097	9
s	1637098	9	1.819e+06	1.19541e+06			20	569988	10				s	176652	8	198734	56936.5			87	125618	9			s	145763	7	187410	125451			24	69306	9			s	140631	6	210946	111506			91	99114	9
total				1.50747e+06									total				275975			88	119017	9			total				326029			25	46788	9			s2	78478	5	141260	41820.1			92	96725	9
input	2256766	10	2256766	1.63317e+06			21	738184	10				input	307259	7	395047	253250			89	153668	9			input	233948	7	300790	238831			26	61628	9			total				184413			93	98900	9
																				90	132240	9										27	39522	9			input	299254	6	448881	349441			94	81994	9
																				91	150463	9										28	53325	9										95	110412	9
																				92	133809	9										29	55653	9										96	93886	9
																				93	123055	9										30	53024	9
																				94	109977	9										31	56259	9
																				95	131549	9										32	70658	9
																																33	43939	9
DapCD-NwkG													DapCD-NwkB												DapC-NwkB												DapD-NwkB
	1	2	3	average										1	2	3	average									1	2	3	average									1	2	3	average
50	45.3946	29.9509	19.1368	31.4941									50	41.2295	60.2073	30.8235	44.0868								50	13.9763	21.454	18.5701	18.0001								50	4.07681	3.87184	-4.86427	1.02812
100	7.93265	7.90081	12.5444	9.4593									100	46.5295	58.17	45.5218	50.0738								100	19.8283	28.4968	31.331	26.552								100	-0.251089	0.1562	-1.31494	-0.469945
200	13.3664	-6.29588	-0.270312	2.26674									200	58.0681	76.2617	40.8809	58.4035								200	40.1507	26.6017	34.893	33.8818								200	2.67769	0.587216	-5.06393	-0.599677
400	-11.2494	-10.143	-4.77845	-8.72363									400	67.7384	65.3226	53.8845	62.3151								400	56.3451	61.7577	54.2005	57.4344								400	-1.99411	2.76103	-1.99248	-0.408522
