# Supplementary material for: An autoinhibitory clamp of actin assembly constrains and directs synaptic endocytosis
Source: eLife journal article supplement (doi:10.7554/elife.69597), 2021-07-29
Supplement: fig3-data1 [file Figure 3D_source data_DapSH3-NwkIntensity.xlsx]

## Sheet: IntCoV
					275.671	234.851	608.032	228.679		9562.91	9260	7531.18	7802.95		0.280476	0.259359	0.411595	0.335795			4675.1	5815.02	5437.46	626.23		0.347426	0.337414	0.526204	0.462204		12101.5	14862.3	6659.07	7626.49		0.313934	0.306258	0.366207	0.368359
File	File	File	File		CellArea	CellArea	CellArea	CellArea		HRPMean	HRPMean	HRPMean	HRPMean		HRPCoV	HRPCoV	HRPCoV	HRPCoV			DapXMean	DapXMean	DapXMean	DapXMean		DapXCoV	DapXCoV	DapXCoV	DapXCoV		NwkMean	NwkMean	NwkMean	NwkMean		NwkCoV	NwkCoV	NwkCoV	NwkCoV		Nwk/Dap	Nwk/Dap	Nwk/Dap	Nwk/Dap
FL	dD	dCD	RNAi		FL	dD	dCD	RNAi		FL	dD	dCD	RNAi		FL	dD	dCD	RNAi			FL	dD	dCD	RNAi		FL	dD	dCD	RNAi		FL	dD	dCD	RNAi		FL	dD	dCD	RNAi		FL	dD	dCD	RNAi
cleaned_FL-01_m4_001.tif	cleaned_dD-01_m4_001.tif	cleaned_dCD-01_m4_001.tif	cleaned_RNAi-01_m4_001.tif		146.617	228.593	503.852	373.037		11045.7	7912.14	9457.67	3888.86		0.28872	0.23967	0.29764	0.48288			6458.15	5222.5	6842.75	437.587		0.33274	0.32483	0.40202	0.52023		15370.1	13798.4	7636.46	5118.94		0.30761	0.30223	0.30021	0.4229		2.37995	2.6421	1.11599
cleaned_FL-01_m4_002.tif	cleaned_dD-01_m4_002.tif	cleaned_dCD-01_m4_002.tif	cleaned_RNAi-01_m4_002.tif		115.753	140.84	695.704	227.654		9586.53	7420.43	9841.93	8115.91		0.27076	0.23665	0.48228	0.28683			5014.1	5119.7	3756.88	724.561		0.27923	0.28711	0.51684	0.44886		14169	14484.9	6317.08	8857.13		0.24285	0.26471	0.40561	0.36489		2.82583	2.82924	1.68147
cleaned_FL-01_m4_003.tif	cleaned_dD-01_m4_003.tif	cleaned_dCD-01_m4_003.tif	cleaned_RNAi-01_m4_003.tif		252.79	246.617	366.716	293.531		10433	7765.71	9016.2	8663.1		0.23468	0.27395	0.31054	0.26993			5694.76	6696.2	4722.93	758.153		0.3054	0.35365	0.44553	0.41513		12625.4	13801.6	7174.27	9478.72		0.27396	0.33439	0.30521	0.34206		2.21702	2.06111	1.51903
cleaned_FL-01_m4_004.tif	cleaned_dD-01_m4_004.tif	cleaned_dCD-01_m4_004.tif	cleaned_RNAi-01_m4_004.tif		288.247	257.877	445.729	205.728		7111.58	10932.7	7232.79	6456.57		0.31012	0.27685	0.40487	0.34471			4316.88	7801.38	6801.67	538.19		0.37425	0.34796	0.53001	0.48869		10011.4	17612.3	7069.61	6712.07		0.31551	0.32309	0.37814	0.35663		2.31913	2.25759	1.03939
cleaned_FL-01_m4_005.tif	cleaned_dD-01_m4_005.tif	cleaned_dCD-01_m4_005.tif	cleaned_RNAi-01_m4_006.tif		131.753	252.198	352.05	286.42		13329.8	12678.4	11491.1	9902.59		0.25631	0.23523	0.39702	0.35221			8388.66	6510.08	6023.79	603.48		0.33554	0.30991	0.52932	0.48752		14093	17110.3	6841.83	7409.71		0.32004	0.28564	0.37348	0.40802		1.68001	2.62829	1.1358
cleaned_FL-01_m4_006.tif	cleaned_dD-01_m4_006.tif	cleaned_dCD-01_m4_006.tif	cleaned_RNAi-02_m4_001.tif		53.8272	282.519	380.445	195.654		8944.03	9755.92	7002.8	5924.56		0.18623	0.24076	0.35125	0.36613			4913.76	4879.76	7027.25	557.118		0.25739	0.44313	0.46433	0.45195		14096.2	9414.44	6983.03	6620.3		0.21866	0.37776	0.34101	0.37841		2.86873	1.92928	0.993708
cleaned_FL-02_m4_001.tif	cleaned_dD-02_m4_001.tif	cleaned_dCD-02_m4_002.tif	cleaned_RNAi-02_m4_002.tif		130.914	341.778	745.63	183.309		10829.4	8438.55	5294.5	5956.27		0.27253	0.27904	0.65209	0.24149			5262.31	4839.68	4196.01	458.292		0.32508	0.35069	0.66749	0.46177		14470.8	14780.8	7182	4813.2		0.28392	0.30406	0.41512	0.31675		2.74989	3.05408	1.71163
cleaned_FL-02_m4_002.tif	cleaned_dD-02_m4_002.tif	cleaned_dCD-02_m4_003.tif	cleaned_RNAi-02_m4_003.tif		495.605	169.827	1137.63	242.074		10617.5	10225.1	4588.22	5643		0.28734	0.2514	0.6085	0.31035			4054.16	6579.51	3582.09	473.476		0.35064	0.30777	0.82735	0.49233		12005.7	18603.5	3683.54	5305.93		0.32736	0.28725	0.47865	0.36581		2.96133	2.82749	1.02832
cleaned_FL-02_m4_003.tif	cleaned_dD-02_m4_003.tif	cleaned_dCD-02_m4_004.tif	cleaned_RNAi-02_m4_004.tif		506.321	157.333	1885.09	236.049		8905.03	8233.28	2426.14	6649.44		0.28379	0.29159	0.65757	0.50645			2411.6	5191.29	1720.18	366.577		0.3561	0.35349	0.6695	0.56884		9442.41	13828.5	3298.03	4216.08		0.31187	0.32697	0.49202	0.44542		3.91541	2.66379	1.91725
cleaned_FL-02_m4_004.tif	cleaned_dD-02_m4_004.tif	cleaned_dCD-02_m4_005.tif	cleaned_RNAi-02_m4_005.tif		364.296	117.432	1026.57	181.63		8733.14	10437.2	5485.74	8213.56		0.31108	0.2614	0.35109	0.24211			2689.19	7964.66	4860.2	685.43		0.38049	0.29815	0.60365	0.42564		9878.22	19183.8	6353.72	8610.99		0.34126	0.2604	0.36689	0.3348		3.67331	2.40861	1.3073
cleaned_FL-02_m4_005.tif	cleaned_dD-02_m4_005.tif	cleaned_dCD-02_m4_006.tif	cleaned_RNAi-02_m4_006.tif		275.259	222.173	393.877	111.704		9123.27	8557.8	8145.26	8894.11		0.26099	0.27644	0.3292	0.33201			4294.51	5066.65	9154.1	785.704		0.34935	0.29178	0.52141	0.3998		12054	15304.8	8516.63	10374		0.3064	0.26713	0.30302	0.33221		2.80683	3.02069	0.930363
cleaned_FL-02_m4_006.tif	cleaned_dD-02_m4_006.tif	cleaned_dCD-03_m4_001.tif	cleaned_RNAi-03_m4_001.tif		274.025	289.235	484.79	323.506		12995.5	9324.23	5393.3	6392.56		0.34157	0.23075	0.514	0.36729			6085.33	4885.29	2137.09	542.869		0.39188	0.34067	0.63227	0.50214		16991.5	13556.1	4480.4	6468.42		0.36422	0.30544	0.48234	0.38234		2.79221	2.77489	2.0965
cleaned_FL-03_m4_001.tif	cleaned_dD-03_m4_001.tif	cleaned_dCD-03_m4_002.tif	cleaned_RNAi-03_m4_002.tif		294.321	350.716	407.21	244.296		8503.93	7208.53	6741.59	11388.6		0.2361	0.27693	0.30162	0.34139			4851.74	3716.98	3217.58	815.644		0.34085	0.36037	0.46897	0.45775		12357.9	12787.3	5593.47	10619.8		0.3023	0.28915	0.3197	0.38802		2.54711	3.44022	1.73841
cleaned_FL-03_m4_002.tif	cleaned_dD-03_m4_002.tif	cleaned_dCD-03_m4_003.tif	cleaned_RNAi-03_m4_003.tif		190.519	113.58	538.371	199.358		7734.67	5839.82	8164.69	10958.7		0.28234	0.21679	0.46459	0.33943			5234.45	5724.51	5646.05	696.289		0.36216	0.30592	0.47588	0.45182		9950.88	11117.7	6406.59	8225.48		0.32523	0.2919	0.34145	0.38069		1.90104	1.94213	1.1347
cleaned_FL-03_m4_003.tif	cleaned_dD-03_m4_003.tif	cleaned_dCD-03_m4_004.tif	cleaned_RNAi-03_m4_004.tif		364.05	349.333	348.988	248.84		7150.67	9213.19	6577.28	8886.82		0.31283	0.24451	0.35572	0.36505			3750.77	4913.96	4609.93	661.984		0.36125	0.33436	0.48752	0.45938		9955.04	12641.9	6116.65	7615.52		0.35468	0.3268	0.36988	0.38772		2.65413	2.57265	1.32684
cleaned_FL-03_m4_004.tif	cleaned_dD-03_m4_004.tif	cleaned_dCD-03_m4_005.tif	cleaned_RNAi-03_m4_005.tif		387.654	302.469	224.988	106.074		8725.22	8921.4	10283	8912.48		0.36186	0.27964	0.26899	0.22446			2529.42	7800.73	12228.2	914.328		0.43946	0.38952	0.35554	0.36342		8603.75	17819.6	11192	11577.5		0.38818	0.34579	0.28351	0.28708		3.40147	2.28436	0.915262
cleaned_FL-03_m4_005.tif	cleaned_dD-03_m4_005.tif	cleaned_dCD-03_m4_006.tif			212.494	240.988	398.914			9066.48	12394.3	10887.9			0.27333	0.2923	0.25015				4245.24	5467.36	5910.17			0.34756	0.30923	0.34783			11320.4	16394.7	8358.83			0.31592	0.29697	0.26928			2.66661	2.99865	1.41431
cleaned_FL-03_m4_006.tif	cleaned_dD-03_m4_006.tif				477.63	163.803				9296.95	11421.4				0.27799	0.26456					3956.74	6290.12				0.3643	0.36491				10430.8	15280.2				0.35084	0.32297				2.63621	2.42925
