# Supplementary material for: An autoinhibitory clamp of actin assembly constrains and directs synaptic endocytosis
Source: eLife journal article supplement (doi:10.7554/elife.69597), 2021-07-29
Supplement: fig3-data1 [file Figure 3E_source data_Dap160-NwkIntensity-Coloc.xlsx]

## Sheet: Dap-X_Nwk_Intensity
File				DapX Mean				DapX CoV				Nwk Mean				Nwk CoV
				4898.15	2452.44	5259.4		0.595536	0.569707	0.682007		1689.14	2049.12	926.055		0.578702	0.545014	0.56199
				DapFL	DapdD	DapdCD		DapFL	DapdD	DapdCD		DapFL	DapdD	DapdCD		DapFL	DapdD	DapdCD
DapdFL-04_m4_001#37-cleaned.tif	DapdD-04_m4_001#19-cleaned.tif	DapdCD-04_m4_001#1-cleaned.tif		3519.24	1428.53	6440.41		0.53237	0.53704	0.69782		1950.26	1912.67	1209.98		0.54045	0.51381	0.54334
DapdFL-04_m4_002#38-cleaned.tif	DapdD-04_m4_002#20-cleaned.tif	DapdCD-04_m4_002#2-cleaned.tif		2909.7	704.399	8942.18		0.6121	0.46381	0.75335		2328.07	2431.98	1313.46		0.61142	0.4339	0.65886
DapdFL-04_m4_003#39-cleaned.tif	DapdD-04_m4_003#21-cleaned.tif	DapdCD-04_m4_003#3-cleaned.tif		4915.86	2298.87	6071.02		0.61313	0.56785	0.81295		1770.82	1829.25	813.343		0.60948	0.5473	0.59948
DapdFL-04_m4_004#40-cleaned.tif	DapdD-04_m4_004#22-cleaned.tif	DapdCD-04_m4_004#4-cleaned.tif		7823.56	2522.04	3664.27		0.63814	0.58442	0.65129		2710.95	1800.32	765.563		0.60865	0.58115	0.58547
DapdFL-04_m4_005#41-cleaned.tif	DapdD-04_m4_005#23-cleaned.tif	DapdCD-04_m4_005#5-cleaned.tif		3083.67	4650.98	6620.79		0.5134	0.5802	0.72208		1558	1818.35	887.567		0.52042	0.52924	0.54379
DapdFL-04_m4_006#42-cleaned.tif	DapdD-04_m4_006#24-cleaned.tif	DapdCD-04_m4_006#6-cleaned.tif		4593.23	2592.12	2075.56		0.57085	0.5745	0.59303		2032.94	2106.84	816.452		0.55436	0.54936	0.51661
DapdFL-05_m4_001#43-cleaned.tif	DapdD-05_m4_001#25-cleaned.tif	DapdCD-05_m4_001#7-cleaned.tif		3728.33	3014.89	5459.43		0.66276	0.63032	0.74542		1109.07	2194.29	1049.85		0.65142	0.59746	0.62672
DapdFL-05_m4_002#44-cleaned.tif	DapdD-05_m4_002#26-cleaned.tif	DapdCD-05_m4_002#8-cleaned.tif		3676.73	2880.04	2038.38		0.53588	0.6041	0.64754		1349.85	2456.87	881.133		0.52167	0.55603	0.50122
DapdFL-05_m4_003#45-cleaned.tif	DapdD-05_m4_003#27-cleaned.tif	DapdCD-05_m4_003#9-cleaned.tif		6403.23	2335.01	3721.11		0.64044	0.59471	0.61077		1330.46	2144.49	962.856		0.59493	0.55231	0.58381
DapdFL-05_m4_005#46-cleaned.tif	DapdD-05_m4_004#28-cleaned.tif	DapdCD-05_m4_004#10-cleaned.tif		9441.58	4266.96	10605.1		0.6837	0.65098	0.76776		1306.91	2618.68	1004.32		0.6354	0.60082	0.61722
DapdFL-06_m4_001#47-cleaned.tif	DapdD-05_m4_005#29-cleaned.tif	DapdCD-05_m4_005#11-cleaned.tif		3611.03	2207.25	4808.4		0.47309	0.55309	0.71878		1430.79	1790.48	1057.12		0.47103	0.5123	0.58517
DapdFL-06_m4_002#48-cleaned.tif	DapdD-05_m4_006#30-cleaned.tif	DapdCD-05_m4_006#12-cleaned.tif		5385.51	2288.72	6505.36		0.63585	0.53658	0.69623		1575.26	1867.39	977.577		0.6272	0.548	0.50076
DapdFL-06_m4_003#49-cleaned.tif	DapdD-06_m4_001#31-cleaned.tif	DapdCD-06_m4_001#13-cleaned.tif		5080.75	3042.6	6307.28		0.672	0.66575	0.7163		2188.76	2608.9	1031.03		0.59335	0.66138	0.60071
DapdFL-06_m4_005#50-cleaned.tif	DapdD-06_m4_002#32-cleaned.tif	DapdCD-06_m4_002#14-cleaned.tif		5295.22	2206.84	3927.24		0.56866	0.55142	0.59036		1339.06	1851.47	913.73		0.55447	0.51639	0.49604
DapdFL-06_m4_006#51-cleaned.tif	DapdD-06_m4_003#33-cleaned.tif	DapdCD-06_m4_003#15-cleaned.tif		4004.56	1688.53	5135.35		0.58067	0.53156	0.68409		1355.95	2052.26	517.081		0.58628	0.52761	0.59387
	DapdD-06_m4_004#34-cleaned.tif	DapdCD-06_m4_004#16-cleaned.tif			2111.95	4037.16			0.52722	0.64997			1519.58	879.586			0.5024	0.54286
	DapdD-06_m4_005#35-cleaned.tif	DapdCD-06_m4_005#17-cleaned.tif			1666.58	2951.38			0.5816	0.62373			2174.44	785.02			0.54424	0.50903
	DapdD-06_m4_006#36-cleaned.tif	DapdCD-06_m4_006#18-cleaned.tif			2237.7	5358.85			0.51958	0.59465			1705.83	803.332			0.53655	0.51086

## Sheet: Dap-X_Nwk_coloc
File				Pearson's R value (no threshold)				Manders' tM1 (Above autothreshold of Ch2)
				DapFL	DapdD	DapdCD		DapFL	DapdD	DapdCD
DapdFL-04_m4_001#37-cleaned_Dap-X_Nwk.txt	DapdD-04_m4_001#19-cleaned_Dap-X_Nwk.txt	DapdCD-04_m4_001#1-cleaned_Dap-X_Nwk.txt		0.81	0.82	0.75		0.95	0.959	0.928
DapdFL-04_m4_002#38-cleaned_Dap-X_Nwk.txt	DapdD-04_m4_002#20-cleaned_Dap-X_Nwk.txt	DapdCD-04_m4_002#2-cleaned_Dap-X_Nwk.txt		0.85	0.76	0.83		0.978	0.969	0.981
DapdFL-04_m4_003#39-cleaned_Dap-X_Nwk.txt	DapdD-04_m4_003#21-cleaned_Dap-X_Nwk.txt	DapdCD-04_m4_003#3-cleaned_Dap-X_Nwk.txt		0.85	0.78	0.73		0.988	0.88	0.93
DapdFL-04_m4_004#40-cleaned_Dap-X_Nwk.txt	DapdD-04_m4_004#22-cleaned_Dap-X_Nwk.txt	DapdCD-04_m4_004#4-cleaned_Dap-X_Nwk.txt		0.82	0.85	0.7		0.993	0.966	0.959
DapdFL-04_m4_005#41-cleaned_Dap-X_Nwk.txt	DapdD-04_m4_005#23-cleaned_Dap-X_Nwk.txt	DapdCD-04_m4_005#5-cleaned_Dap-X_Nwk.txt		0.82	0.79	0.7		0.998	0.988	0.939
DapdFL-04_m4_006#42-cleaned_Dap-X_Nwk.txt	DapdD-04_m4_006#24-cleaned_Dap-X_Nwk.txt	DapdCD-04_m4_006#6-cleaned_Dap-X_Nwk.txt		0.83	0.82	0.64		0.989	0.97	0.744
DapdFL-05_m4_001#43-cleaned_Dap-X_Nwk.txt	DapdD-05_m4_001#25-cleaned_Dap-X_Nwk.txt	DapdCD-05_m4_001#7-cleaned_Dap-X_Nwk.txt		0.82	0.82	0.75		0.994	0.996	0.962
DapdFL-05_m4_002#44-cleaned_Dap-X_Nwk.txt	DapdD-05_m4_002#26-cleaned_Dap-X_Nwk.txt	DapdCD-05_m4_002#8-cleaned_Dap-X_Nwk.txt		0.85	0.85	0.46		0.994	0.966	0.556
DapdFL-05_m4_003#45-cleaned_Dap-X_Nwk.txt	DapdD-05_m4_003#27-cleaned_Dap-X_Nwk.txt	DapdCD-05_m4_003#9-cleaned_Dap-X_Nwk.txt		0.81	0.85	0.64		0.983	0.93	0.946
DapdFL-05_m4_005#46-cleaned_Dap-X_Nwk.txt	DapdD-05_m4_004#28-cleaned_Dap-X_Nwk.txt	DapdCD-05_m4_004#10-cleaned_Dap-X_Nwk.txt		0.8	0.84	0.74		0.975	0.998	0.952
DapdFL-06_m4_001#47-cleaned_Dap-X_Nwk.txt	DapdD-05_m4_005#29-cleaned_Dap-X_Nwk.txt	DapdCD-05_m4_005#11-cleaned_Dap-X_Nwk.txt		0.81	0.81	0.72		0.994	0.911	0.95
DapdFL-06_m4_002#48-cleaned_Dap-X_Nwk.txt	DapdD-05_m4_006#30-cleaned_Dap-X_Nwk.txt	DapdCD-05_m4_006#12-cleaned_Dap-X_Nwk.txt		0.81	0.79	0.6		0.991	0.874	0.884
DapdFL-06_m4_003#49-cleaned_Dap-X_Nwk.txt	DapdD-06_m4_001#31-cleaned_Dap-X_Nwk.txt	DapdCD-06_m4_001#13-cleaned_Dap-X_Nwk.txt		0.83	0.84	0.72		0.985	0.969	0.95
DapdFL-06_m4_005#50-cleaned_Dap-X_Nwk.txt	DapdD-06_m4_002#32-cleaned_Dap-X_Nwk.txt	DapdCD-06_m4_002#14-cleaned_Dap-X_Nwk.txt		0.76	0.77	0.73		0.981	0.955	0.955
DapdFL-06_m4_006#51-cleaned_Dap-X_Nwk.txt	DapdD-06_m4_003#33-cleaned_Dap-X_Nwk.txt	DapdCD-06_m4_003#15-cleaned_Dap-X_Nwk.txt		0.81	0.77	0.62		0.99	0.877	0.909
	DapdD-06_m4_004#34-cleaned_Dap-X_Nwk.txt	DapdCD-06_m4_004#16-cleaned_Dap-X_Nwk.txt			0.7	0.72			0.963	0.951
	DapdD-06_m4_005#35-cleaned_Dap-X_Nwk.txt	DapdCD-06_m4_005#17-cleaned_Dap-X_Nwk.txt			0.79	0.65			0.955	0.775
	DapdD-06_m4_006#36-cleaned_Dap-X_Nwk.txt	DapdCD-06_m4_006#18-cleaned_Dap-X_Nwk.txt			0.78	0.72			0.895	0.957
