# Supplementary material for: An autoinhibitory clamp of actin assembly constrains and directs synaptic endocytosis
Source: eLife journal article supplement (doi:10.7554/elife.69597), 2021-07-29
Supplement: fig4-data1 [file Figure 4A_source data_pyrene rates.xlsx]

## Sheet: Sheet1
Actin	Arp2/3WASp	NwkB	Dap160CD	NwkB+DapCD	NwkB+Dap160C
0.46457	1.2675	1.78597	1.06309	2.56118	1.55612
0.589518	1.21795	1.26764	1.43485	3.75679	0.93079
		0.999964	1.02856	2.33679
				2.21368
