# Supplementary material for: An autoinhibitory clamp of actin assembly constrains and directs synaptic endocytosis
Source: eLife journal article supplement (doi:10.7554/elife.69597), 2021-07-29
Supplement: fig4-data1 [file Figure 4B_source data_pyrene rates.xlsx]

## Sheet: Sheet1
(1) Actin	(2) Arp2/3 WASp	(3) NwkB 100nM	(4) NwkB + Dap160SHCD	(5) NwkB + Dap160SH3CD + 10%Li	(6) NwkB + Dap160SH3CD + 5%Li
0.539027	0.60274	0.952344	1.22369	1.90487	1.66264
0.663179	0.692246	0.631888	2.28147	4.43404	1.13432
		0.95471	0.974206	1.5788	1.88331
			0.869315	1.70015
			1.13186
