# Supplementary material for: An autoinhibitory clamp of actin assembly constrains and directs synaptic endocytosis
Source: eLife journal article supplement (doi:10.7554/elife.69597), 2021-07-29
Supplement: fig7-data1 [file Figure 7-supplement 1A_source data_AP2clcRadial.xlsx]

## Sheet: Sheet1
Radial Distance	AP2-1	AP2-2	AP2-3	AP2-4	AP2-5	AP2-6			Clc-1	Clc-2	Clc-3	Clc-4	Clc-5	Clc-6
0	1.55458	1.57876	1.83386	1.34125	1.4605	1.35236
0.085196	1.25336	1.41458	1.7099	1.17595	1.37227	1.34164
0.170393	0.98605	1.17752	1.43861	0.95093	1.18069	1.14001
0.255589	0.86275	0.95293	1.17001	0.76933	0.99922	0.88923
0.340785	0.82341	0.81522	0.98005	0.66842	0.87871	0.69329
0.425981	0.81314	0.75115	0.87739	0.63586	0.82191	0.58244
0.511178	0.76631	0.71724	0.80919	0.65016	0.79283	0.54071
0.596374	0.68511	0.68417	0.76629	0.70841	0.75122	0.53619
0.68157	0.60779	0.66516	0.75616		0.70648
0.766767	0.58178	0.66601	0.7526		0.67389
0.851963	0.62311	0.62583	0.72673		0.65932
0.937159	0.66218	0.56892	0.68348		0.65149
0									1.423	1.32457	1.35574	1.47329	1.41236	1.22867
0.08									1.37936	1.27987	1.25252	1.37355	1.31363	1.16801
0.15									1.23521	1.15619	1.09324	1.19802	1.14626	1.05116
0.23									1.08657	1.04347	0.98573	1.07665	1.00809	0.95763
0.31									0.97653	0.9735	0.92326	1.00397	0.91577	0.90912
0.39									0.90229	0.93227	0.89514	0.96547	0.85841	0.90044
0.46									0.84692	0.90675	0.88972	0.94441	0.82519	0.91479
0.54									0.79846	0.88658	0.88457	0.92341	0.79893	0.9341
0.62									0.74714	0.85941	0.87605	0.90116	0.76852	0.94931
0.69									0.69977	0.82367	0.87323	0.88	0.74335	0.95079
