# Supplementary material for: An autoinhibitory clamp of actin assembly constrains and directs synaptic endocytosis
Source: eLife journal article supplement (doi:10.7554/elife.69597), 2021-07-29
Supplement: fig7-data1 [file Figure 7-supplement 1B_source data_AP2-lifeR.xlsx]

## Sheet: Sheet1
AP2
0.2
0.24
0.52
0.24
0.28
0.37
0.09
0.13
0.42
0.22
0.24
0.33
0.25
0.32
