# Supplementary material for: An autoinhibitory clamp of actin assembly constrains and directs synaptic endocytosis
Source: eLife journal article supplement (doi:10.7554/elife.69597), 2021-07-29
Supplement: fig7-data1 [file Figure 7-supplement 2_source data_satelliteboutons.xlsx]

## Sheet: Sheet1
Original	Coded	File	Boutons	Satellites	SatRatio
Z:\Current members\DelSignore\Data-2019\190719 DapX Dlg-488_DapX-cherry-HRP-647\tif\\CD8-02_a3_m4_001_MaxBS.tif	128870.tif	128870.tif	31	0	0
Z:\Current members\DelSignore\Data-2019\190719 DapX Dlg-488_DapX-cherry-HRP-647\tif\\DapFL_02_a3_001_MaxBS.tif	144099.tif	144099.tif	37	7	0.18919
Z:\Current members\DelSignore\Data-2019\190719 DapX Dlg-488_DapX-cherry-HRP-647\tif\\DapFL_04_a3_004_MaxBS.tif	153828.tif	153828.tif	36	4	0.11111
Z:\Current members\DelSignore\Data-2019\190719 DapX Dlg-488_DapX-cherry-HRP-647\tif\\DapdCD-04_a4_m4_003_MaxBS.tif	172208.tif	172208.tif	19	0	0
Z:\Current members\DelSignore\Data-2019\190719 DapX Dlg-488_DapX-cherry-HRP-647\tif\\CD8-06_a3_m4_004_MaxBS.tif	191513.tif	191513.tif	42	1	0.02381
Z:\Current members\DelSignore\Data-2019\190719 DapX Dlg-488_DapX-cherry-HRP-647\tif\\DapdCD-06_a3_m4_001_MaxBS.tif	196214.tif	196214.tif	58	0	0
Z:\Current members\DelSignore\Data-2019\190719 DapX Dlg-488_DapX-cherry-HRP-647\tif\\DapRNAi-01_a3_m4_001_MaxBS.tif	199113.tif	199113.tif	60	20	0.33333
Z:\Current members\DelSignore\Data-2019\190719 DapX Dlg-488_DapX-cherry-HRP-647\tif\\DapdCD-05_a4_m4_001_MaxBS.tif	200466.tif	200466.tif	57	6	0.10526
Z:\Current members\DelSignore\Data-2019\190719 DapX Dlg-488_DapX-cherry-HRP-647\tif\\CD8-03_a3_m4_002_MaxBS.tif	208159.tif	208159.tif	39	2	0.05128
Z:\Current members\DelSignore\Data-2019\190719 DapX Dlg-488_DapX-cherry-HRP-647\tif\\DapFL_01_a4_002_MaxBS.tif	214627.tif	214627.tif	42	5	0.11905
Z:\Current members\DelSignore\Data-2019\190719 DapX Dlg-488_DapX-cherry-HRP-647\tif\\DapFL_06_a3_001_MaxBS.tif	230821.tif	230821.tif	59	4	0.0678
Z:\Current members\DelSignore\Data-2019\190719 DapX Dlg-488_DapX-cherry-HRP-647\tif\\CD8-01_a4_m4_002_MaxBS.tif	243543.tif	243543.tif	26	0	0
Z:\Current members\DelSignore\Data-2019\190719 DapX Dlg-488_DapX-cherry-HRP-647\tif\\DapFL_04_a4_003_MaxBS.tif	266449.tif	266449.tif	32	7	0.21875
Z:\Current members\DelSignore\Data-2019\190719 DapX Dlg-488_DapX-cherry-HRP-647\tif\\DapFL_01_a3_001_MaxBS.tif	268743.tif	268743.tif	40	11	0.275
Z:\Current members\DelSignore\Data-2019\190719 DapX Dlg-488_DapX-cherry-HRP-647\tif\\DapFL_02_a3_004_MaxBS.tif	272003.tif	272003.tif	48	3	0.0625
Z:\Current members\DelSignore\Data-2019\190719 DapX Dlg-488_DapX-cherry-HRP-647\tif\\CD8-05_a3_m4_001_MaxBS.tif	280203.tif	280203.tif	43	5	0.11628
Z:\Current members\DelSignore\Data-2019\190719 DapX Dlg-488_DapX-cherry-HRP-647\tif\\DapdD-03_a3_m4_001_MaxBS.tif	287629.tif	287629.tif	36	1	0.02778
Z:\Current members\DelSignore\Data-2019\190719 DapX Dlg-488_DapX-cherry-HRP-647\tif\\CD8-06_a4_m4_002_MaxBS.tif	294899.tif	294899.tif	27	3	0.11111
Z:\Current members\DelSignore\Data-2019\190719 DapX Dlg-488_DapX-cherry-HRP-647\tif\\DapdD-03_a4_m4_002_MaxBS.tif	313341.tif	313341.tif	23	0	0
Z:\Current members\DelSignore\Data-2019\190719 DapX Dlg-488_DapX-cherry-HRP-647\tif\\DapRNAi-04_a4_m4_002_MaxBS.tif	333659.tif	333659.tif	29	0	0
Z:\Current members\DelSignore\Data-2019\190719 DapX Dlg-488_DapX-cherry-HRP-647\tif\\DapdD-04_a4_m4_004_MaxBS.tif	342639.tif	342639.tif	46	0	0
Z:\Current members\DelSignore\Data-2019\190719 DapX Dlg-488_DapX-cherry-HRP-647\tif\\DapRNAi-03_a3_m4_004_MaxBS.tif	377984.tif	377984.tif	29	10	0.34483
Z:\Current members\DelSignore\Data-2019\190719 DapX Dlg-488_DapX-cherry-HRP-647\tif\\DapdD-01_a3_m4_004_MaxBS.tif	379266.tif	379266.tif	35	0	0
Z:\Current members\DelSignore\Data-2019\190719 DapX Dlg-488_DapX-cherry-HRP-647\tif\\DapRNAi-02_a3_m4_001_MaxBS.tif	387960.tif	387960.tif	74	29	0.39189
Z:\Current members\DelSignore\Data-2019\190719 DapX Dlg-488_DapX-cherry-HRP-647\tif\\CD8-04_a3_m4_004_MaxBS.tif	408018.tif	408018.tif	32	3	0.09375
Z:\Current members\DelSignore\Data-2019\190719 DapX Dlg-488_DapX-cherry-HRP-647\tif\\DapFL_06_a3_004_MaxBS.tif	40985.tif	40985.tif	51	1	0.01961
Z:\Current members\DelSignore\Data-2019\190719 DapX Dlg-488_DapX-cherry-HRP-647\tif\\DapdD-01_a4_m4_003_MaxBS.tif	418409.tif	418409.tif	41	2	0.04878
Z:\Current members\DelSignore\Data-2019\190719 DapX Dlg-488_DapX-cherry-HRP-647\tif\\DapFL_06_a4_002_MaxBS.tif	425122.tif	425122.tif	54	0	0
Z:\Current members\DelSignore\Data-2019\190719 DapX Dlg-488_DapX-cherry-HRP-647\tif\\DapdCD-06_a4_m4_003_MaxBS.tif	426588.tif	426588.tif	12	0	0
Z:\Current members\DelSignore\Data-2019\190719 DapX Dlg-488_DapX-cherry-HRP-647\tif\\CD8-01_a3_m4_004_MaxBS.tif	426635.tif	426635.tif	42	12	0.28571
Z:\Current members\DelSignore\Data-2019\190719 DapX Dlg-488_DapX-cherry-HRP-647\tif\\DapFL_02_a4_002_MaxBS.tif	433186.tif	433186.tif	47	11	0.23404
Z:\Current members\DelSignore\Data-2019\190719 DapX Dlg-488_DapX-cherry-HRP-647\tif\\DapdCD-04_a4_m4_002_MaxBS.tif	43480.tif	43480.tif	33	2	0.06061
Z:\Current members\DelSignore\Data-2019\190719 DapX Dlg-488_DapX-cherry-HRP-647\tif\\CD8-02_a4_m4_002_MaxBS.tif	438837.tif	438837.tif	25	2	0.08
Z:\Current members\DelSignore\Data-2019\190719 DapX Dlg-488_DapX-cherry-HRP-647\tif\\DapdCD-03_a4_m4_003_MaxBS.tif	453629.tif	453629.tif	55	0	0
Z:\Current members\DelSignore\Data-2019\190719 DapX Dlg-488_DapX-cherry-HRP-647\tif\\CD8-04_a4_m4_002_MaxBS.tif	460035.tif	460035.tif	43	5	0.11628
Z:\Current members\DelSignore\Data-2019\190719 DapX Dlg-488_DapX-cherry-HRP-647\tif\\DapdD-02_a4_m4_002_MaxBS.tif	469356.tif	469356.tif	39	0	0
Z:\Current members\DelSignore\Data-2019\190719 DapX Dlg-488_DapX-cherry-HRP-647\tif\\DapRNAi-03_a3_m4_003_MaxBS.tif	469552.tif	469552.tif	33	3	0.09091
Z:\Current members\DelSignore\Data-2019\190719 DapX Dlg-488_DapX-cherry-HRP-647\tif\\CD8-02_a3_m4_004_MaxBS.tif	471421.tif	471421.tif	42	8	0.19048
Z:\Current members\DelSignore\Data-2019\190719 DapX Dlg-488_DapX-cherry-HRP-647\tif\\DapdCD-03_a3_m4_004_MaxBS.tif	472918.tif	472918.tif	36	0	0
Z:\Current members\DelSignore\Data-2019\190719 DapX Dlg-488_DapX-cherry-HRP-647\tif\\DapFL_06_a4_003_MaxBS.tif	475891.tif	475891.tif	51	0	0
Z:\Current members\DelSignore\Data-2019\190719 DapX Dlg-488_DapX-cherry-HRP-647\tif\\DapFL_02_a4_003_MaxBS.tif	482678.tif	482678.tif	55	1	0.01818
Z:\Current members\DelSignore\Data-2019\190719 DapX Dlg-488_DapX-cherry-HRP-647\tif\\DapFL_04_a3_001_MaxBS.tif	484704.tif	484704.tif	50	5	0.1
Z:\Current members\DelSignore\Data-2019\190719 DapX Dlg-488_DapX-cherry-HRP-647\tif\\DapdD-05_a3_m4_001_MaxBS.tif	496376.tif	496376.tif	41	4	0.09756
Z:\Current members\DelSignore\Data-2019\190719 DapX Dlg-488_DapX-cherry-HRP-647\tif\\DapdCD-02_a4_m4_004_MaxBS.tif	498558.tif	498558.tif	33	0	0
Z:\Current members\DelSignore\Data-2019\190719 DapX Dlg-488_DapX-cherry-HRP-647\tif\\DapRNAi-06_a3_m4_001_MaxBS.tif	514407.tif	514407.tif	66	18	0.27273
Z:\Current members\DelSignore\Data-2019\190719 DapX Dlg-488_DapX-cherry-HRP-647\tif\\CD8-03_a3_m4_001_MaxBS.tif	519164.tif	519164.tif	36	3	0.08333
Z:\Current members\DelSignore\Data-2019\190719 DapX Dlg-488_DapX-cherry-HRP-647\tif\\DapRNAi-04_a4_m4_003_MaxBS.tif	532423.tif	532423.tif	53	7	0.13208
Z:\Current members\DelSignore\Data-2019\190719 DapX Dlg-488_DapX-cherry-HRP-647\tif\\DapdD-02_a3_m4_004_MaxBS.tif	536324.tif	536324.tif	56	3	0.05357
Z:\Current members\DelSignore\Data-2019\190719 DapX Dlg-488_DapX-cherry-HRP-647\tif\\DapFL_05_a4_002_MaxBS.tif	560844.tif	560844.tif	68	4	0.05882
Z:\Current members\DelSignore\Data-2019\190719 DapX Dlg-488_DapX-cherry-HRP-647\tif\\DapdD-02_a4_m4_003_MaxBS.tif	569513.tif	569513.tif	29	0	0
Z:\Current members\DelSignore\Data-2019\190719 DapX Dlg-488_DapX-cherry-HRP-647\tif\\CD8-01_a3_m4_001_MaxBS.tif	572577.tif	572577.tif	56	10	0.17857
Z:\Current members\DelSignore\Data-2019\190719 DapX Dlg-488_DapX-cherry-HRP-647\tif\\DapRNAi-06_a4_m4_003_MaxBS.tif	59167.tif	59167.tif	49	10	0.20408
Z:\Current members\DelSignore\Data-2019\190719 DapX Dlg-488_DapX-cherry-HRP-647\tif\\DapdCD-06_a4_m4_004_MaxBS.tif	593540.tif	593540.tif	66	0	0
Z:\Current members\DelSignore\Data-2019\190719 DapX Dlg-488_DapX-cherry-HRP-647\tif\\DapdCD-01_a4_m4_003_MaxBS.tif	603354.tif	603354.tif	52	5	0.09615
Z:\Current members\DelSignore\Data-2019\190719 DapX Dlg-488_DapX-cherry-HRP-647\tif\\CD8-05_a3_m4_004_MaxBS.tif	604820.tif	604820.tif	49	0	0
Z:\Current members\DelSignore\Data-2019\190719 DapX Dlg-488_DapX-cherry-HRP-647\tif\\DapdCD-03_a4_m4_002_MaxBS.tif	612402.tif	612402.tif	38	7	0.18421
Z:\Current members\DelSignore\Data-2019\190719 DapX Dlg-488_DapX-cherry-HRP-647\tif\\CD8-01_a4_m4_003_MaxBS.tif	616298.tif	616298.tif	53	14	0.26415
Z:\Current members\DelSignore\Data-2019\190719 DapX Dlg-488_DapX-cherry-HRP-647\tif\\DapFL_04_a4_002_MaxBS.tif	624476.tif	624476.tif	52	4	0.07692
Z:\Current members\DelSignore\Data-2019\190719 DapX Dlg-488_DapX-cherry-HRP-647\tif\\DapRNAi-05_a4_m4_002_MaxBS.tif	642642.tif	642642.tif	40	6	0.15
Z:\Current members\DelSignore\Data-2019\190719 DapX Dlg-488_DapX-cherry-HRP-647\tif\\DapdD-05_a4_m4_004_MaxBS.tif	64806.tif	64806.tif	49	7	0.14286
Z:\Current members\DelSignore\Data-2019\190719 DapX Dlg-488_DapX-cherry-HRP-647\tif\\DapdD-03_a3_m4_004_MaxBS.tif	650176.tif	650176.tif	24	1	0.04167
Z:\Current members\DelSignore\Data-2019\190719 DapX Dlg-488_DapX-cherry-HRP-647\tif\\DapdCD-02_a4_m4_002_MaxBS.tif	662134.tif	662134.tif	48	5	0.10417
Z:\Current members\DelSignore\Data-2019\190719 DapX Dlg-488_DapX-cherry-HRP-647\tif\\DapdCD-02_a3_m4_001_MaxBS.tif	682692.tif	682692.tif	44	4	0.09091
Z:\Current members\DelSignore\Data-2019\190719 DapX Dlg-488_DapX-cherry-HRP-647\tif\\CD8-02_a4_m4_003_MaxBS.tif	684990.tif	684990.tif	36	1	0.02778
Z:\Current members\DelSignore\Data-2019\190719 DapX Dlg-488_DapX-cherry-HRP-647\tif\\DapFL_03_a3_001_MaxBS.tif	695683.tif	695683.tif	22	0	0
Z:\Current members\DelSignore\Data-2019\190719 DapX Dlg-488_DapX-cherry-HRP-647\tif\\DapFL_03_a4_002_MaxBS.tif	703620.tif	703620.tif	49	0	0
Z:\Current members\DelSignore\Data-2019\190719 DapX Dlg-488_DapX-cherry-HRP-647\tif\\DapRNAi-04_a3_m4_001_MaxBS.tif	705398.tif	705398.tif	45	6	0.13333
Z:\Current members\DelSignore\Data-2019\190719 DapX Dlg-488_DapX-cherry-HRP-647\tif\\DapFL_05_a4_001_MaxBS.tif	716535.tif	716535.tif	38	9	0.23684
Z:\Current members\DelSignore\Data-2019\190719 DapX Dlg-488_DapX-cherry-HRP-647\tif\\DapdCD-06_a3_m4_002_MaxBS.tif	718418.tif	718418.tif	63	13	0.20635
Z:\Current members\DelSignore\Data-2019\190719 DapX Dlg-488_DapX-cherry-HRP-647\tif\\DapRNAi-06_a3_m4_004_MaxBS.tif	720901.tif	720901.tif	14	4	0.28571
Z:\Current members\DelSignore\Data-2019\190719 DapX Dlg-488_DapX-cherry-HRP-647\tif\\DapRNAi-01_a4_m4_003_MaxBS.tif	73126.tif	73126.tif	53	22	0.41509
Z:\Current members\DelSignore\Data-2019\190719 DapX Dlg-488_DapX-cherry-HRP-647\tif\\CD8-04_a3_m4_001_MaxBS.tif	740266.tif	740266.tif	44	5	0.11364
Z:\Current members\DelSignore\Data-2019\190719 DapX Dlg-488_DapX-cherry-HRP-647\tif\\DapRNAi-03_a3_m4_001_MaxBS.tif	752936.tif	752936.tif	45	17	0.37778
Z:\Current members\DelSignore\Data-2019\190719 DapX Dlg-488_DapX-cherry-HRP-647\tif\\DapdD-01_a4_m4_002_MaxBS.tif	759073.tif	759073.tif	25	8	0.32
Z:\Current members\DelSignore\Data-2019\190719 DapX Dlg-488_DapX-cherry-HRP-647\tif\\DapdCD-04_a3_m4_001_MaxBS.tif	765557.tif	765557.tif	34	4	0.11765
Z:\Current members\DelSignore\Data-2019\190719 DapX Dlg-488_DapX-cherry-HRP-647\tif\\CD8-05_a4_m4_003_MaxBS.tif	772747.tif	772747.tif	22	1	0.04545
Z:\Current members\DelSignore\Data-2019\190719 DapX Dlg-488_DapX-cherry-HRP-647\tif\\DapRNAi-02_a4_m4_002_MaxBS.tif	782510.tif	782510.tif	49	8	0.16327
Z:\Current members\DelSignore\Data-2019\190719 DapX Dlg-488_DapX-cherry-HRP-647\tif\\DapdD-04_a3_m4_001_MaxBS.tif	783933.tif	783933.tif	50	3	0.06
Z:\Current members\DelSignore\Data-2019\190719 DapX Dlg-488_DapX-cherry-HRP-647\tif\\DapdD-04_a4_m4_002_MaxBS.tif	786.tif	786.tif	76	2	0.02632
Z:\Current members\DelSignore\Data-2019\190719 DapX Dlg-488_DapX-cherry-HRP-647\tif\\DapdCD-02_a4_m4_003_MaxBS.tif	80140.tif	80140.tif	43	9	0.2093
Z:\Current members\DelSignore\Data-2019\190719 DapX Dlg-488_DapX-cherry-HRP-647\tif\\DapRNAi-05_a3_m4_004_MaxBS.tif	812394.tif	812394.tif	58	24	0.41379
Z:\Current members\DelSignore\Data-2019\190719 DapX Dlg-488_DapX-cherry-HRP-647\tif\\DapdCD-01_a3_m4_001_MaxBS.tif	82052.tif	82052.tif	62	2	0.03226
Z:\Current members\DelSignore\Data-2019\190719 DapX Dlg-488_DapX-cherry-HRP-647\tif\\DapdD-03_a4_m4_003_MaxBS.tif	82319.tif	82319.tif	45	7	0.15556
Z:\Current members\DelSignore\Data-2019\190719 DapX Dlg-488_DapX-cherry-HRP-647\tif\\DapRNAi-02_a4_m4_003_MaxBS.tif	828950.tif	828950.tif	41	3	0.07317
Z:\Current members\DelSignore\Data-2019\190719 DapX Dlg-488_DapX-cherry-HRP-647\tif\\DapFL_01_a4_003_MaxBS.tif	829688.tif	829688.tif	49	3	0.06122
Z:\Current members\DelSignore\Data-2019\190719 DapX Dlg-488_DapX-cherry-HRP-647\tif\\DapdD-05_a4_m4_002_MaxBS.tif	840143.tif	840143.tif	38	1	0.02632
Z:\Current members\DelSignore\Data-2019\190719 DapX Dlg-488_DapX-cherry-HRP-647\tif\\DapdCD-01_a4_m4_002_MaxBS.tif	8457.tif	8457.tif	67	0	0
Z:\Current members\DelSignore\Data-2019\190719 DapX Dlg-488_DapX-cherry-HRP-647\tif\\DapdD-05_a3_m4_003_MaxBS.tif	850090.tif	850090.tif	43	2	0.04651
Z:\Current members\DelSignore\Data-2019\190719 DapX Dlg-488_DapX-cherry-HRP-647\tif\\DapdD-02_a3_m4_001_MaxBS.tif	854899.tif	854899.tif	39	0	0
Z:\Current members\DelSignore\Data-2019\190719 DapX Dlg-488_DapX-cherry-HRP-647\tif\\DapRNAi-02_a3_m4_004_MaxBS.tif	859044.tif	859044.tif	35	13	0.37143
Z:\Current members\DelSignore\Data-2019\190719 DapX Dlg-488_DapX-cherry-HRP-647\tif\\DapFL_01_a3_004_MaxBS.tif	862688.tif	862688.tif	47	9	0.19149
Z:\Current members\DelSignore\Data-2019\190719 DapX Dlg-488_DapX-cherry-HRP-647\tif\\DapdCD-05_a3_m4_002_MaxBS.tif	876087.tif	876087.tif	69	1	0.01449
Z:\Current members\DelSignore\Data-2019\190719 DapX Dlg-488_DapX-cherry-HRP-647\tif\\DapRNAi-03_a3_m4_002_MaxBS.tif	878102.tif	878102.tif	25	0	0
Z:\Current members\DelSignore\Data-2019\190719 DapX Dlg-488_DapX-cherry-HRP-647\tif\\DapRNAi-06_a4_m4_002_MaxBS.tif	884648.tif	884648.tif	40	15	0.375
Z:\Current members\DelSignore\Data-2019\190719 DapX Dlg-488_DapX-cherry-HRP-647\tif\\DapRNAi-05_a3_m4_001_MaxBS.tif	890826.tif	890826.tif	82	35	0.42683
Z:\Current members\DelSignore\Data-2019\190719 DapX Dlg-488_DapX-cherry-HRP-647\tif\\DapRNAi-05_a4_m4_003_MaxBS.tif	905735.tif	905735.tif	58	16	0.27586
Z:\Current members\DelSignore\Data-2019\190719 DapX Dlg-488_DapX-cherry-HRP-647\tif\\DapRNAi-04_a3_m4_004_MaxBS.tif	910683.tif	910683.tif	22	9	0.40909
Z:\Current members\DelSignore\Data-2019\190719 DapX Dlg-488_DapX-cherry-HRP-647\tif\\DapFL_03_a3_003_MaxBS.tif	911783.tif	911783.tif	44	2	0.04545
Z:\Current members\DelSignore\Data-2019\190719 DapX Dlg-488_DapX-cherry-HRP-647\tif\\DapRNAi-01_a3_m4_004_MaxBS.tif	911839.tif	911839.tif	44	20	0.45455
Z:\Current members\DelSignore\Data-2019\190719 DapX Dlg-488_DapX-cherry-HRP-647\tif\\CD8-06_a4_m4_003_MaxBS.tif	928885.tif	928885.tif	46	4	0.08696
Z:\Current members\DelSignore\Data-2019\190719 DapX Dlg-488_DapX-cherry-HRP-647\tif\\CD8-06_a3_m4_001_MaxBS.tif	948131.tif	948131.tif	36	2	0.05556
Z:\Current members\DelSignore\Data-2019\190719 DapX Dlg-488_DapX-cherry-HRP-647\tif\\CD8-05_a4_m4_002_MaxBS.tif	955340.tif	955340.tif	46	7	0.15217
Z:\Current members\DelSignore\Data-2019\190719 DapX Dlg-488_DapX-cherry-HRP-647\tif\\DapdCD-03_a3_m4_001_MaxBS.tif	956219.tif	956219.tif	46	0	0
Z:\Current members\DelSignore\Data-2019\190719 DapX Dlg-488_DapX-cherry-HRP-647\tif\\DapdCD-01_a3_m4_004_MaxBS.tif	964861.tif	964861.tif	51	2	0.03922
Z:\Current members\DelSignore\Data-2019\190719 DapX Dlg-488_DapX-cherry-HRP-647\tif\\DapdCD-05_a4_m4_003_MaxBS.tif	968711.tif	968711.tif	44	4	0.09091
Z:\Current members\DelSignore\Data-2019\190719 DapX Dlg-488_DapX-cherry-HRP-647\tif\\DapRNAi-01_a4_m4_002_MaxBS.tif	970475.tif	970475.tif	65	20	0.30769
Z:\Current members\DelSignore\Data-2019\190719 DapX Dlg-488_DapX-cherry-HRP-647\tif\\CD8-04_a4_m4_003_MaxBS.tif	975351.tif	975351.tif	51	6	0.11765
Z:\Current members\DelSignore\Data-2019\190719 DapX Dlg-488_DapX-cherry-HRP-647\tif\\DapX-01_a3_m4_001_MaxBS.tif	983180.tif	983180.tif	50	9	0.18
Z:\Current members\DelSignore\Data-2019\190719 DapX Dlg-488_DapX-cherry-HRP-647\tif\\DapdCD-04_a3_m4_004_MaxBS.tif	992414.tif	992414.tif	47	6	0.12766

## Sheet: uncoded
										39.4091	46.2381	40.8333	46.8261	46.2083		4.27273	4.28571	2.27778	3.04348	13.125		0.0997255	0.0993319	0.0581628	0.0643109	0.266768
Original										Boutons		Boutons	Boutons	Boutons		Satellites	Satellites	Satellites	Satellites	Satellites		SatRatio	SatRatio	SatRatio	SatRatio	SatRatio
										CD8	FL	dD	dCD	dapRNAi		CD8	FL	dD	dCD	dapRNAi		CD8	FL	dD	dCD	dapRNAi
Z:\Current members\DelSignore\Data-2019\190719 DapX Dlg-488_DapX-cherry-HRP-647\tif\\CD8-01_a3_m4_001_MaxBS.tif	Z:\Current members\DelSignore\Data-2019\190719 DapX Dlg-488_DapX-cherry-HRP-647\tif\\DapFL_01_a3_001_MaxBS.tif	Z:\Current members\DelSignore\Data-2019\190719 DapX Dlg-488_DapX-cherry-HRP-647\tif\\DapdD-01_a3_m4_004_MaxBS.tif	Z:\Current members\DelSignore\Data-2019\190719 DapX Dlg-488_DapX-cherry-HRP-647\tif\\DapdCD-01_a3_m4_001_MaxBS.tif	Z:\Current members\DelSignore\Data-2019\190719 DapX Dlg-488_DapX-cherry-HRP-647\tif\\DapRNAi-01_a3_m4_001_MaxBS.tif						56	40	35	62	60		10	11	0	2	20		0.17857	0.275	0	0.03226	0.33333
Z:\Current members\DelSignore\Data-2019\190719 DapX Dlg-488_DapX-cherry-HRP-647\tif\\CD8-01_a3_m4_004_MaxBS.tif	Z:\Current members\DelSignore\Data-2019\190719 DapX Dlg-488_DapX-cherry-HRP-647\tif\\DapFL_01_a3_004_MaxBS.tif	Z:\Current members\DelSignore\Data-2019\190719 DapX Dlg-488_DapX-cherry-HRP-647\tif\\DapdD-01_a4_m4_002_MaxBS.tif	Z:\Current members\DelSignore\Data-2019\190719 DapX Dlg-488_DapX-cherry-HRP-647\tif\\DapdCD-01_a3_m4_004_MaxBS.tif	Z:\Current members\DelSignore\Data-2019\190719 DapX Dlg-488_DapX-cherry-HRP-647\tif\\DapRNAi-01_a3_m4_004_MaxBS.tif						42	47	25	51	44		12	9	8	2	20		0.28571	0.19149	0.32	0.03922	0.45455
Z:\Current members\DelSignore\Data-2019\190719 DapX Dlg-488_DapX-cherry-HRP-647\tif\\CD8-01_a4_m4_002_MaxBS.tif	Z:\Current members\DelSignore\Data-2019\190719 DapX Dlg-488_DapX-cherry-HRP-647\tif\\DapFL_01_a4_002_MaxBS.tif	Z:\Current members\DelSignore\Data-2019\190719 DapX Dlg-488_DapX-cherry-HRP-647\tif\\DapdD-01_a4_m4_003_MaxBS.tif	Z:\Current members\DelSignore\Data-2019\190719 DapX Dlg-488_DapX-cherry-HRP-647\tif\\DapdCD-01_a4_m4_002_MaxBS.tif	Z:\Current members\DelSignore\Data-2019\190719 DapX Dlg-488_DapX-cherry-HRP-647\tif\\DapRNAi-01_a4_m4_002_MaxBS.tif						26	42	41	67	65		0	5	2	0	20		0	0.11905	0.04878	0	0.30769
Z:\Current members\DelSignore\Data-2019\190719 DapX Dlg-488_DapX-cherry-HRP-647\tif\\CD8-01_a4_m4_003_MaxBS.tif	Z:\Current members\DelSignore\Data-2019\190719 DapX Dlg-488_DapX-cherry-HRP-647\tif\\DapFL_01_a4_003_MaxBS.tif	Z:\Current members\DelSignore\Data-2019\190719 DapX Dlg-488_DapX-cherry-HRP-647\tif\\DapdD-02_a3_m4_001_MaxBS.tif	Z:\Current members\DelSignore\Data-2019\190719 DapX Dlg-488_DapX-cherry-HRP-647\tif\\DapdCD-01_a4_m4_003_MaxBS.tif	Z:\Current members\DelSignore\Data-2019\190719 DapX Dlg-488_DapX-cherry-HRP-647\tif\\DapRNAi-01_a4_m4_003_MaxBS.tif						53	49	39	52	53		14	3	0	5	22		0.26415	0.06122	0	0.09615	0.41509
Z:\Current members\DelSignore\Data-2019\190719 DapX Dlg-488_DapX-cherry-HRP-647\tif\\CD8-02_a3_m4_001_MaxBS.tif	Z:\Current members\DelSignore\Data-2019\190719 DapX Dlg-488_DapX-cherry-HRP-647\tif\\DapFL_02_a3_001_MaxBS.tif	Z:\Current members\DelSignore\Data-2019\190719 DapX Dlg-488_DapX-cherry-HRP-647\tif\\DapdD-02_a3_m4_004_MaxBS.tif	Z:\Current members\DelSignore\Data-2019\190719 DapX Dlg-488_DapX-cherry-HRP-647\tif\\DapdCD-02_a3_m4_001_MaxBS.tif	Z:\Current members\DelSignore\Data-2019\190719 DapX Dlg-488_DapX-cherry-HRP-647\tif\\DapRNAi-02_a3_m4_001_MaxBS.tif						31	37	56	44	74		0	7	3	4	29		0	0.18919	0.05357	0.09091	0.39189
Z:\Current members\DelSignore\Data-2019\190719 DapX Dlg-488_DapX-cherry-HRP-647\tif\\CD8-02_a3_m4_004_MaxBS.tif	Z:\Current members\DelSignore\Data-2019\190719 DapX Dlg-488_DapX-cherry-HRP-647\tif\\DapFL_02_a3_004_MaxBS.tif	Z:\Current members\DelSignore\Data-2019\190719 DapX Dlg-488_DapX-cherry-HRP-647\tif\\DapdD-02_a4_m4_002_MaxBS.tif	Z:\Current members\DelSignore\Data-2019\190719 DapX Dlg-488_DapX-cherry-HRP-647\tif\\DapdCD-02_a4_m4_002_MaxBS.tif	Z:\Current members\DelSignore\Data-2019\190719 DapX Dlg-488_DapX-cherry-HRP-647\tif\\DapRNAi-02_a3_m4_004_MaxBS.tif						42	48	39	48	35		8	3	0	5	13		0.19048	0.0625	0	0.10417	0.37143
Z:\Current members\DelSignore\Data-2019\190719 DapX Dlg-488_DapX-cherry-HRP-647\tif\\CD8-02_a4_m4_002_MaxBS.tif	Z:\Current members\DelSignore\Data-2019\190719 DapX Dlg-488_DapX-cherry-HRP-647\tif\\DapFL_02_a4_002_MaxBS.tif	Z:\Current members\DelSignore\Data-2019\190719 DapX Dlg-488_DapX-cherry-HRP-647\tif\\DapdD-02_a4_m4_003_MaxBS.tif	Z:\Current members\DelSignore\Data-2019\190719 DapX Dlg-488_DapX-cherry-HRP-647\tif\\DapdCD-02_a4_m4_003_MaxBS.tif	Z:\Current members\DelSignore\Data-2019\190719 DapX Dlg-488_DapX-cherry-HRP-647\tif\\DapRNAi-02_a4_m4_002_MaxBS.tif						25	47	29	43	49		2	11	0	9	8		0.08	0.23404	0	0.2093	0.16327
Z:\Current members\DelSignore\Data-2019\190719 DapX Dlg-488_DapX-cherry-HRP-647\tif\\CD8-02_a4_m4_003_MaxBS.tif	Z:\Current members\DelSignore\Data-2019\190719 DapX Dlg-488_DapX-cherry-HRP-647\tif\\DapFL_02_a4_003_MaxBS.tif	Z:\Current members\DelSignore\Data-2019\190719 DapX Dlg-488_DapX-cherry-HRP-647\tif\\DapdD-03_a3_m4_001_MaxBS.tif	Z:\Current members\DelSignore\Data-2019\190719 DapX Dlg-488_DapX-cherry-HRP-647\tif\\DapdCD-02_a4_m4_004_MaxBS.tif	Z:\Current members\DelSignore\Data-2019\190719 DapX Dlg-488_DapX-cherry-HRP-647\tif\\DapRNAi-02_a4_m4_003_MaxBS.tif						36	55	36	33	41		1	1	1	0	3		0.02778	0.01818	0.02778	0	0.07317
Z:\Current members\DelSignore\Data-2019\190719 DapX Dlg-488_DapX-cherry-HRP-647\tif\\CD8-03_a3_m4_001_MaxBS.tif	Z:\Current members\DelSignore\Data-2019\190719 DapX Dlg-488_DapX-cherry-HRP-647\tif\\DapFL_03_a3_001_MaxBS.tif	Z:\Current members\DelSignore\Data-2019\190719 DapX Dlg-488_DapX-cherry-HRP-647\tif\\DapdD-03_a3_m4_004_MaxBS.tif	Z:\Current members\DelSignore\Data-2019\190719 DapX Dlg-488_DapX-cherry-HRP-647\tif\\DapdCD-03_a3_m4_001_MaxBS.tif	Z:\Current members\DelSignore\Data-2019\190719 DapX Dlg-488_DapX-cherry-HRP-647\tif\\DapRNAi-03_a3_m4_001_MaxBS.tif						36	22	24	46	45		3	0	1	0	17		0.08333	0	0.04167	0	0.37778
Z:\Current members\DelSignore\Data-2019\190719 DapX Dlg-488_DapX-cherry-HRP-647\tif\\CD8-03_a3_m4_002_MaxBS.tif	Z:\Current members\DelSignore\Data-2019\190719 DapX Dlg-488_DapX-cherry-HRP-647\tif\\DapFL_03_a3_003_MaxBS.tif	Z:\Current members\DelSignore\Data-2019\190719 DapX Dlg-488_DapX-cherry-HRP-647\tif\\DapdD-03_a4_m4_002_MaxBS.tif	Z:\Current members\DelSignore\Data-2019\190719 DapX Dlg-488_DapX-cherry-HRP-647\tif\\DapdCD-03_a3_m4_004_MaxBS.tif	Z:\Current members\DelSignore\Data-2019\190719 DapX Dlg-488_DapX-cherry-HRP-647\tif\\DapRNAi-03_a3_m4_002_MaxBS.tif						39	44	23	36	25		2	2	0	0	0		0.05128	0.04545	0	0	0
Z:\Current members\DelSignore\Data-2019\190719 DapX Dlg-488_DapX-cherry-HRP-647\tif\\CD8-04_a3_m4_001_MaxBS.tif	Z:\Current members\DelSignore\Data-2019\190719 DapX Dlg-488_DapX-cherry-HRP-647\tif\\DapFL_03_a4_002_MaxBS.tif	Z:\Current members\DelSignore\Data-2019\190719 DapX Dlg-488_DapX-cherry-HRP-647\tif\\DapdD-03_a4_m4_003_MaxBS.tif	Z:\Current members\DelSignore\Data-2019\190719 DapX Dlg-488_DapX-cherry-HRP-647\tif\\DapdCD-03_a4_m4_002_MaxBS.tif	Z:\Current members\DelSignore\Data-2019\190719 DapX Dlg-488_DapX-cherry-HRP-647\tif\\DapRNAi-03_a3_m4_003_MaxBS.tif						44	49	45	38	33		5	0	7	7	3		0.11364	0	0.15556	0.18421	0.09091
Z:\Current members\DelSignore\Data-2019\190719 DapX Dlg-488_DapX-cherry-HRP-647\tif\\CD8-04_a3_m4_004_MaxBS.tif	Z:\Current members\DelSignore\Data-2019\190719 DapX Dlg-488_DapX-cherry-HRP-647\tif\\DapFL_04_a3_001_MaxBS.tif	Z:\Current members\DelSignore\Data-2019\190719 DapX Dlg-488_DapX-cherry-HRP-647\tif\\DapdD-04_a3_m4_001_MaxBS.tif	Z:\Current members\DelSignore\Data-2019\190719 DapX Dlg-488_DapX-cherry-HRP-647\tif\\DapdCD-03_a4_m4_003_MaxBS.tif	Z:\Current members\DelSignore\Data-2019\190719 DapX Dlg-488_DapX-cherry-HRP-647\tif\\DapRNAi-03_a3_m4_004_MaxBS.tif						32	50	50	55	29		3	5	3	0	10		0.09375	0.1	0.06	0	0.34483
Z:\Current members\DelSignore\Data-2019\190719 DapX Dlg-488_DapX-cherry-HRP-647\tif\\CD8-04_a4_m4_002_MaxBS.tif	Z:\Current members\DelSignore\Data-2019\190719 DapX Dlg-488_DapX-cherry-HRP-647\tif\\DapFL_04_a3_004_MaxBS.tif	Z:\Current members\DelSignore\Data-2019\190719 DapX Dlg-488_DapX-cherry-HRP-647\tif\\DapdD-04_a4_m4_002_MaxBS.tif	Z:\Current members\DelSignore\Data-2019\190719 DapX Dlg-488_DapX-cherry-HRP-647\tif\\DapdCD-04_a3_m4_001_MaxBS.tif	Z:\Current members\DelSignore\Data-2019\190719 DapX Dlg-488_DapX-cherry-HRP-647\tif\\DapRNAi-04_a3_m4_001_MaxBS.tif						43	36	76	34	45		5	4	2	4	6		0.11628	0.11111	0.02632	0.11765	0.13333
Z:\Current members\DelSignore\Data-2019\190719 DapX Dlg-488_DapX-cherry-HRP-647\tif\\CD8-04_a4_m4_003_MaxBS.tif	Z:\Current members\DelSignore\Data-2019\190719 DapX Dlg-488_DapX-cherry-HRP-647\tif\\DapFL_04_a4_002_MaxBS.tif	Z:\Current members\DelSignore\Data-2019\190719 DapX Dlg-488_DapX-cherry-HRP-647\tif\\DapdD-04_a4_m4_004_MaxBS.tif	Z:\Current members\DelSignore\Data-2019\190719 DapX Dlg-488_DapX-cherry-HRP-647\tif\\DapdCD-04_a3_m4_004_MaxBS.tif	Z:\Current members\DelSignore\Data-2019\190719 DapX Dlg-488_DapX-cherry-HRP-647\tif\\DapRNAi-04_a3_m4_004_MaxBS.tif						51	52	46	47	22		6	4	0	6	9		0.11765	0.07692	0	0.12766	0.40909
Z:\Current members\DelSignore\Data-2019\190719 DapX Dlg-488_DapX-cherry-HRP-647\tif\\CD8-05_a3_m4_001_MaxBS.tif	Z:\Current members\DelSignore\Data-2019\190719 DapX Dlg-488_DapX-cherry-HRP-647\tif\\DapFL_04_a4_003_MaxBS.tif	Z:\Current members\DelSignore\Data-2019\190719 DapX Dlg-488_DapX-cherry-HRP-647\tif\\DapdD-05_a3_m4_001_MaxBS.tif	Z:\Current members\DelSignore\Data-2019\190719 DapX Dlg-488_DapX-cherry-HRP-647\tif\\DapdCD-04_a4_m4_002_MaxBS.tif	Z:\Current members\DelSignore\Data-2019\190719 DapX Dlg-488_DapX-cherry-HRP-647\tif\\DapRNAi-04_a4_m4_002_MaxBS.tif						43	32	41	33	29		5	7	4	2	0		0.11628	0.21875	0.09756	0.06061	0
Z:\Current members\DelSignore\Data-2019\190719 DapX Dlg-488_DapX-cherry-HRP-647\tif\\CD8-05_a3_m4_004_MaxBS.tif	Z:\Current members\DelSignore\Data-2019\190719 DapX Dlg-488_DapX-cherry-HRP-647\tif\\DapFL_05_a4_001_MaxBS.tif	Z:\Current members\DelSignore\Data-2019\190719 DapX Dlg-488_DapX-cherry-HRP-647\tif\\DapdD-05_a3_m4_003_MaxBS.tif	Z:\Current members\DelSignore\Data-2019\190719 DapX Dlg-488_DapX-cherry-HRP-647\tif\\DapdCD-04_a4_m4_003_MaxBS.tif	Z:\Current members\DelSignore\Data-2019\190719 DapX Dlg-488_DapX-cherry-HRP-647\tif\\DapRNAi-04_a4_m4_003_MaxBS.tif						49	38	43	19	53		0	9	2	0	7		0	0.23684	0.04651	0	0.13208
Z:\Current members\DelSignore\Data-2019\190719 DapX Dlg-488_DapX-cherry-HRP-647\tif\\CD8-05_a4_m4_002_MaxBS.tif	Z:\Current members\DelSignore\Data-2019\190719 DapX Dlg-488_DapX-cherry-HRP-647\tif\\DapFL_05_a4_002_MaxBS.tif	Z:\Current members\DelSignore\Data-2019\190719 DapX Dlg-488_DapX-cherry-HRP-647\tif\\DapdD-05_a4_m4_002_MaxBS.tif	Z:\Current members\DelSignore\Data-2019\190719 DapX Dlg-488_DapX-cherry-HRP-647\tif\\DapdCD-05_a3_m4_002_MaxBS.tif	Z:\Current members\DelSignore\Data-2019\190719 DapX Dlg-488_DapX-cherry-HRP-647\tif\\DapRNAi-05_a3_m4_001_MaxBS.tif						46	68	38	69	82		7	4	1	1	35		0.15217	0.05882	0.02632	0.01449	0.42683
Z:\Current members\DelSignore\Data-2019\190719 DapX Dlg-488_DapX-cherry-HRP-647\tif\\CD8-05_a4_m4_003_MaxBS.tif	Z:\Current members\DelSignore\Data-2019\190719 DapX Dlg-488_DapX-cherry-HRP-647\tif\\DapFL_06_a3_001_MaxBS.tif	Z:\Current members\DelSignore\Data-2019\190719 DapX Dlg-488_DapX-cherry-HRP-647\tif\\DapdD-05_a4_m4_004_MaxBS.tif	Z:\Current members\DelSignore\Data-2019\190719 DapX Dlg-488_DapX-cherry-HRP-647\tif\\DapdCD-05_a4_m4_001_MaxBS.tif	Z:\Current members\DelSignore\Data-2019\190719 DapX Dlg-488_DapX-cherry-HRP-647\tif\\DapRNAi-05_a3_m4_004_MaxBS.tif						22	59	49	57	58		1	4	7	6	24		0.04545	0.0678	0.14286	0.10526	0.41379
Z:\Current members\DelSignore\Data-2019\190719 DapX Dlg-488_DapX-cherry-HRP-647\tif\\CD8-06_a3_m4_001_MaxBS.tif	Z:\Current members\DelSignore\Data-2019\190719 DapX Dlg-488_DapX-cherry-HRP-647\tif\\DapFL_06_a3_004_MaxBS.tif		Z:\Current members\DelSignore\Data-2019\190719 DapX Dlg-488_DapX-cherry-HRP-647\tif\\DapdCD-05_a4_m4_003_MaxBS.tif	Z:\Current members\DelSignore\Data-2019\190719 DapX Dlg-488_DapX-cherry-HRP-647\tif\\DapRNAi-05_a4_m4_002_MaxBS.tif						36	51		44	40		2	1		4	6		0.05556	0.01961		0.09091	0.15
Z:\Current members\DelSignore\Data-2019\190719 DapX Dlg-488_DapX-cherry-HRP-647\tif\\CD8-06_a3_m4_004_MaxBS.tif	Z:\Current members\DelSignore\Data-2019\190719 DapX Dlg-488_DapX-cherry-HRP-647\tif\\DapFL_06_a4_002_MaxBS.tif		Z:\Current members\DelSignore\Data-2019\190719 DapX Dlg-488_DapX-cherry-HRP-647\tif\\DapdCD-06_a3_m4_001_MaxBS.tif	Z:\Current members\DelSignore\Data-2019\190719 DapX Dlg-488_DapX-cherry-HRP-647\tif\\DapRNAi-05_a4_m4_003_MaxBS.tif						42	54		58	58		1	0		0	16		0.02381	0		0	0.27586
Z:\Current members\DelSignore\Data-2019\190719 DapX Dlg-488_DapX-cherry-HRP-647\tif\\CD8-06_a4_m4_002_MaxBS.tif	Z:\Current members\DelSignore\Data-2019\190719 DapX Dlg-488_DapX-cherry-HRP-647\tif\\DapFL_06_a4_003_MaxBS.tif		Z:\Current members\DelSignore\Data-2019\190719 DapX Dlg-488_DapX-cherry-HRP-647\tif\\DapdCD-06_a3_m4_002_MaxBS.tif	Z:\Current members\DelSignore\Data-2019\190719 DapX Dlg-488_DapX-cherry-HRP-647\tif\\DapRNAi-06_a3_m4_001_MaxBS.tif						27	51		63	66		3	0		13	18		0.11111	0		0.20635	0.27273
Z:\Current members\DelSignore\Data-2019\190719 DapX Dlg-488_DapX-cherry-HRP-647\tif\\CD8-06_a4_m4_003_MaxBS.tif			Z:\Current members\DelSignore\Data-2019\190719 DapX Dlg-488_DapX-cherry-HRP-647\tif\\DapdCD-06_a4_m4_003_MaxBS.tif	Z:\Current members\DelSignore\Data-2019\190719 DapX Dlg-488_DapX-cherry-HRP-647\tif\\DapRNAi-06_a3_m4_004_MaxBS.tif						46			12	14		4			0	4		0.08696			0	0.28571
			Z:\Current members\DelSignore\Data-2019\190719 DapX Dlg-488_DapX-cherry-HRP-647\tif\\DapdCD-06_a4_m4_004_MaxBS.tif	Z:\Current members\DelSignore\Data-2019\190719 DapX Dlg-488_DapX-cherry-HRP-647\tif\\DapRNAi-06_a4_m4_002_MaxBS.tif									66	40					0	15					0	0.375
				Z:\Current members\DelSignore\Data-2019\190719 DapX Dlg-488_DapX-cherry-HRP-647\tif\\DapRNAi-06_a4_m4_003_MaxBS.tif										49						10						0.20408
