# Supplementary material for: An autoinhibitory clamp of actin assembly constrains and directs synaptic endocytosis
Source: eLife journal article supplement (doi:10.7554/elife.69597), 2021-07-29
Supplement: fig7-data1 [file Figure 7-supplement 3A-C_source data_NwkFM.xlsx]

## Sheet: Presynaptic-Intensity_CoV
		Load							Unload
File		PreArea	Ch-1_Mean	Ch-1_CoV	Ch-2_Mean	Ch-2_CoV									GFP Ratio	FM Ratio	Load	Unload
GFP	Unload
GFP_01_Load_m67_a3l_004-cleaned.tif	GFP_01_UnLoad_m67_a3l_005-cleaned.tif	1893.73	10808.5	0.3895	1146.98	0.47583			923.013	13275.8	0.39851	578.316	0.37194		-22.8275	49.5791	1146.98	578.316
GFP_01_Load_m67_a3r_001-cleaned.tif	GFP_01_UnLoad_m67_a3r_008-cleaned.tif	1597.83	11784.8	0.37787	1859.58	0.39311			2406.52	9798.66	0.40854	460.083	0.43244		16.8532	75.2587	1859.58	460.083
GFP_01_Load_m67_a4l_003-cleaned.tif	GFP_01_UnLoad_m67_a4l_006-cleaned.tif	1323.61	4098.08	0.37056	286.765	0.56716			2149.38	11268.5	0.34379	714.795	0.2508		-174.969	-149.262	286.765	714.795
GFP_01_Load_m67_a4r_002-cleaned.tif	GFP_01_UnLoad_m67_a4r_007-cleaned.tif	1800.15	10367.9	0.38365	2212.72	0.32912			2102.62	6868.42	0.41206	524.731	0.37381		33.7532	76.2857	2212.72	524.731
GFP_02_Load_m67_a3l_004-cleaned.tif	GFP_02_UnLoad_m67_a3l_005-cleaned.tif	983.013	11006.3	0.35383	1170.23	0.35934			902.223	17518.7	0.33186	624.703	0.34534		-59.1693	46.6172	1170.23	624.703
GFP_02_Load_m67_a3r_001-cleaned.tif	GFP_02_UnLoad_m67_a3r_008-cleaned.tif	2407.85	15681.3	0.3729	1644.92	0.3215			945.581	16719.3	0.35953	504.674	0.40998		-6.61932	69.3193	1644.92	504.674
GFP_02_Load_m67_a4l_003-cleaned.tif	GFP_02_UnLoad_m67_a4l_006-cleaned.tif	1171.06	13691.8	0.38765	1652.69	0.34839			1089.93	18366.9	0.39394	783.751	0.30932		-34.1452	52.5773	1652.69	783.751
GFP_02_Load_m67_a4r_002-cleaned.tif	GFP_02_UnLoad_m67_a4r_007-cleaned.tif	2216.99	21319.7	0.3889	1886.16	0.35278			2112.15	22792.2	0.36633	1043.42	0.23042		-6.90685	44.6804	1886.16	1043.42
GFP_03_Load_m67_a3l_004-cleaned.tif	GFP_03_UnLoad_m67_a3l_005-cleaned.tif	1378.62	14861.3	0.34413	1960.56	0.2765			1303.26	14578.4	0.32641	797.028	0.32434		1.90373	59.3469	1960.56	797.028
GFP_03_Load_m67_a3r_001-cleaned.tif	GFP_03_UnLoad_m67_a3r_008-cleaned.tif	1648.89	13998.6	0.3577	3118.43	0.29943			516.05	11937.3	0.36973	2971.45	0.41627		14.7249	4.71314	3118.43	2971.45
GFP_03_Load_m67_a4l_003-cleaned.tif	GFP_03_UnLoad_m67_a4l_006-cleaned.tif	2386.52	12928.2	0.36729	1698.11	0.32725			1715.31	12383.1	0.3596	852.929	0.33286		4.21657	49.7718	1698.11	852.929
GFP_03_Load_m67_a4r_002-cleaned.tif	GFP_03_UnLoad_m67_a4r_007-cleaned.tif	776.494	16077.7	0.31797	6312.33	0.32324			149.728	6069.17	0.3513	528.475	0.38066		62.2509	91.6279	6312.33	528.475
GFP_04_Load_m67_a3l_004-cleaned.tif	GFP_04_UnLoad_m67_a3l_005-cleaned.tif	2831.85	8354.33	0.36602	1446.18	0.27159			2080.49	6799.78	0.41482	450.766	0.40451		18.6078	68.8305	1446.18	450.766
GFP_04_Load_m67_a3r_001-cleaned.tif	GFP_04_UnLoad_m67_a3r_008-cleaned.tif	1509.24	9364.39	0.387	1359.29	0.42347			2175.8	10426	0.41119	563.552	0.38772		-11.3367	58.5408	1359.29	563.552
GFP_04_Load_m67_a4l_003-cleaned.tif	GFP_04_UnLoad_m67_a4l_006-cleaned.tif	951.21	27113.4	0.31539	1869	0.38228			927.605	21178.2	0.35121	1327.2	0.42813		21.8905	28.989	1869	1327.2
GFP_04_Load_m67_a4r_002-cleaned.tif	GFP_04_UnLoad_m67_a4r_007-cleaned.tif	1142.32	7905.61	0.33543	1259.29	0.37229			994.075	8561.32	0.34273	460.939	0.4209		-8.29413	63.3969	1259.29	460.939
NWK_01_Load_m67_a3l_004-cleaned.tif	NWK_01_UnLoad_m67_a3l_005-cleaned.tif	1809.33	2426.66	0.41995	969.281	0.44051			2117.68	3259.63	0.37723	512.951	0.43075		-34.3261	47.0792	969.281	512.951
NWK_01_Load_m67_a3r_001-cleaned.tif	NWK_01_UnLoad_m67_a3r_008-cleaned.tif	1084.05	2781.3	0.41091	990.965	0.51636			1128.79	2517.36	0.41715	411.708	0.49844		9.49	58.4538	990.965	411.708
NWK_01_Load_m67_a4l_003-cleaned.tif	NWK_01_UnLoad_m67_a4l_006-cleaned.tif	1386.12	1497.46	0.39026	1157.91	0.44717			1143.8	1518.18	0.37985	734.543	0.48534		-1.38372	36.5629	1157.91	734.543
NWK_01_Load_m67_a4r_002-cleaned.tif	NWK_01_UnLoad_m67_a4r_007-cleaned.tif	393.136	3842.37	0.32694	1459.73	0.36115			447.013	6508.76	0.32818	663.986	0.38608		-69.3945	54.513	1459.73	663.986
NWK_02_Load_m67_a3l_004-cleaned.tif	NWK_02_UnLoad_m67_a3l_005-cleaned.tif	1309.73	1590.88	0.3152	956.36	0.2496			1217.78	1592.01	0.42606	355.357	0.51527		-0.0704633	62.8427	956.36	355.357
NWK_02_Load_m67_a3r_001-cleaned.tif	NWK_02_UnLoad_m67_a3r_008-cleaned.tif	3706.42	2158.49	0.34306	1546.55	0.33237			3020.59	2302.58	0.41495	828.052	0.49038		-6.67522	46.4583	1546.55	828.052
NWK_02_Load_m67_a4l_003-cleaned.tif	NWK_02_UnLoad_m67_a4l_006-cleaned.tif	1966.37	1600.22	0.41226	768.145	0.44195			1740.59	1894.49	0.39877	422.276	0.46842		-18.3896	45.0265	768.145	422.276
NWK_02_Load_m67_a4r_002-cleaned.tif	NWK_02_UnLoad_m67_a4r_007-cleaned.tif	3295.66	2640.74	0.3954	750.153	0.43543			3773.04	2973.41	0.40484	422.262	0.47877		-12.5979	43.7099	750.153	422.262
NWK_03_Load_m67_a3l_004-cleaned.tif	NWK_03_UnLoad_m67_a3l_005-cleaned.tif	2089.33	125.711	0.76494	82.0303	1.01039			666.766	1319.53	0.3637	337.925	0.49288		-949.656	-311.952	82.0303	337.925
NWK_03_Load_m67_a3r_001-cleaned.tif	NWK_03_UnLoad_m67_a3r_008-cleaned.tif	1467.61	4179.24	0.36536	1274.74	0.45226			2784.3	3233.97	0.40646	314.473	0.56573		22.6181	75.3305	1274.74	314.473
NWK_03_Load_m67_a4l_003-cleaned.tif	NWK_03_UnLoad_m67_a4l_006-cleaned.tif	2635.75	891.053	0.43842	224.899	0.65016			2328.35	619.363	0.45107	159.163	0.72007		30.4908	29.2291	224.899	159.163
NWK_03_Load_m67_a4r_002-cleaned.tif	NWK_03_UnLoad_m67_a4r_007-cleaned.tif	3480.59	2937.3	0.35614	1181.33	0.30385			5178.82	2338.56	0.42807	351.316	0.52616		20.384	70.2609	1181.33	351.316
NWK_04_Load_m67_a3l_004-cleaned.tif	NWK_04_UnLoad_m67_a3l_005-cleaned.tif	3252.4	4866.85	0.32375	1151.46	0.33847			3171.8	5593.85	0.38486	351.049	0.51469		-14.938	69.5128	1151.46	351.049
NWK_04_Load_m67_a3r_001-cleaned.tif	NWK_04_UnLoad_m67_a3r_008-cleaned.tif	2186.17	4159.57	0.39569	667.888	0.50968			3919.31	4360.51	0.45608	271.175	0.57032		-4.83083	59.3982	667.888	271.175
NWK_04_Load_m67_a4l_003-cleaned.tif	NWK_04_UnLoad_m67_a4l_006-cleaned.tif	2811.66	5131.56	0.34185	756.38	0.30846			1428.84	4681.49	0.38153	211.253	0.61242		8.77067	72.0706	756.38	211.253
NWK_04_Load_m67_a4r_002-cleaned.tif	NWK_04_UnLoad_m67_a4r_007-cleaned.tif	1823.75	3673.45	0.35992	679.924	0.47027			2664.59	7146.73	0.36702	218.732	0.56567		-94.5509	67.8299	679.924	218.732
NWK_05_Load_m67_a3l_004-cleaned.tif	NWK_05_UnLoad_m67_a3l_005-cleaned.tif	1608.25	2297.79	0.34834	1145.05	0.26753			4251.16	2708.06	0.35187	696.7	0.24598		-17.8549	39.1553	1145.05	696.7
NWK_05_Load_m67_a3r_001-cleaned.tif	NWK_05_UnLoad_m67_a3r_008-cleaned.tif	901.531	3985.8	0.35307	1632.66	0.38367			3751.66	2506.59	0.42094	384.189	0.49931		37.1121	76.4685	1632.66	384.189
NWK_05_Load_m67_a4l_003-cleaned.tif	NWK_05_UnLoad_m67_a4l_006-cleaned.tif	2633.58	5747.74	0.35667	737.577	0.37456			2071.8	3950.33	0.36609	934.687	0.27705		31.2715	-26.7239	737.577	934.687
NWK_05_Load_m67_a4r_002-cleaned.tif	NWK_05_UnLoad_m67_a4r_007-cleaned.tif	2157.98	1325.21	0.40812	1104.82	0.39835			1443.9	1242.9	0.40784	631.613	0.46976		6.21106	42.8313	1104.82	631.613

## Sheet: Sheet1
			-9.37922	-52.916		55.969	51.0531		2039.76	1008.2		831.468	467.131
			GFP Ratio	GFP Ratio		FM Ratio	FM Ratio		Load	Load		Unload	Unload
Unload			GFP	Nwk		GFP	Nwk		GFP	Nwk		GFP	Nwk
GFP_01_UnLoad_m67_a3l_005-cleaned.tif	NWK_01_UnLoad_m67_a3l_005-cleaned.tif		-22.8275	-34.3261		49.5791	47.0792		1146.98	969.281		578.316	512.951
GFP_01_UnLoad_m67_a3r_008-cleaned.tif	NWK_01_UnLoad_m67_a3r_008-cleaned.tif		16.8532	9.49		75.2587	58.4538		1859.58	990.965		460.083	411.708
GFP_01_UnLoad_m67_a4l_006-cleaned.tif	NWK_01_UnLoad_m67_a4l_006-cleaned.tif		-174.969	-1.38372			36.5629			1157.91			734.543
GFP_01_UnLoad_m67_a4r_007-cleaned.tif	NWK_01_UnLoad_m67_a4r_007-cleaned.tif		33.7532	-69.3945		76.2857	54.513		2212.72	1459.73		524.731	663.986
GFP_02_UnLoad_m67_a3l_005-cleaned.tif	NWK_02_UnLoad_m67_a3l_005-cleaned.tif		-59.1693	-0.0704633		46.6172	62.8427		1170.23	956.36		624.703	355.357
GFP_02_UnLoad_m67_a3r_008-cleaned.tif	NWK_02_UnLoad_m67_a3r_008-cleaned.tif		-6.61932	-6.67522		69.3193	46.4583		1644.92	1546.55		504.674	828.052
GFP_02_UnLoad_m67_a4l_006-cleaned.tif	NWK_02_UnLoad_m67_a4l_006-cleaned.tif		-34.1452	-18.3896		52.5773	45.0265		1652.69	768.145		783.751	422.276
GFP_02_UnLoad_m67_a4r_007-cleaned.tif	NWK_02_UnLoad_m67_a4r_007-cleaned.tif		-6.90685	-12.5979		44.6804	43.7099		1886.16	750.153		1043.42	422.262
GFP_03_UnLoad_m67_a3l_005-cleaned.tif	NWK_03_UnLoad_m67_a3l_005-cleaned.tif		1.90373	-949.656		59.3469			1960.56			797.028
GFP_03_UnLoad_m67_a3r_008-cleaned.tif	NWK_03_UnLoad_m67_a3r_008-cleaned.tif		14.7249	22.6181		4.71314	75.3305		3118.43	1274.74		2971.45	314.473
GFP_03_UnLoad_m67_a4l_006-cleaned.tif	NWK_03_UnLoad_m67_a4l_006-cleaned.tif		4.21657	30.4908		49.7718	29.2291		1698.11	224.899		852.929	159.163
GFP_03_UnLoad_m67_a4r_007-cleaned.tif	NWK_03_UnLoad_m67_a4r_007-cleaned.tif		62.2509	20.384		91.6279	70.2609		6312.33	1181.33		528.475	351.316
GFP_04_UnLoad_m67_a3l_005-cleaned.tif	NWK_04_UnLoad_m67_a3l_005-cleaned.tif		18.6078	-14.938		68.8305	69.5128		1446.18	1151.46		450.766	351.049
GFP_04_UnLoad_m67_a3r_008-cleaned.tif	NWK_04_UnLoad_m67_a3r_008-cleaned.tif		-11.3367	-4.83083		58.5408	59.3982		1359.29	667.888		563.552	271.175
GFP_04_UnLoad_m67_a4l_006-cleaned.tif	NWK_04_UnLoad_m67_a4l_006-cleaned.tif		21.8905	8.77067		28.989	72.0706		1869	756.38		1327.2	211.253
GFP_04_UnLoad_m67_a4r_007-cleaned.tif	NWK_04_UnLoad_m67_a4r_007-cleaned.tif		-8.29413	-94.5509		63.3969	67.8299		1259.29	679.924		460.939	218.732
	NWK_05_UnLoad_m67_a3l_005-cleaned.tif			-17.8549			39.1553			1145.05			696.7
	NWK_05_UnLoad_m67_a3r_008-cleaned.tif			37.1121			76.4685			1632.66			384.189
	NWK_05_UnLoad_m67_a4l_006-cleaned.tif			31.2715			-26.7239			737.577			934.687
	NWK_05_UnLoad_m67_a4r_007-cleaned.tif			6.21106			42.8313			1104.82			631.613
