# Supplementary material for: An autoinhibitory clamp of actin assembly constrains and directs synaptic endocytosis
Source: eLife journal article supplement (doi:10.7554/elife.69597), 2021-07-29
Supplement: fig7-data1 [file Figure 7AB_source data_kymographTraces.xlsx]

## Sheet: ColumnTraces
Raw									Norm to 0								Norm 0-1
ResliceofSD569_L05_m67_a4_003_Max_Reg-1_C1	ResliceofSD569_L05_m67_a4_003_Max_Reg-1_C2	ResliceofSD569_L05_m67_a4_003_Max_Reg-3_C1	ResliceofSD569_L05_m67_a4_003_Max_Reg-3_C2	ResliceofSD569_L05_m67_a4_003_Max_Reg-6_C1	ResliceofSD569_L05_m67_a4_003_Max_Reg-6_C2				ResliceofSD569_L05_m67_a4_003_Max_Reg-1_C1	ResliceofSD569_L05_m67_a4_003_Max_Reg-1_C2	ResliceofSD569_L05_m67_a4_003_Max_Reg-3_C1	ResliceofSD569_L05_m67_a4_003_Max_Reg-3_C2	ResliceofSD569_L05_m67_a4_003_Max_Reg-6_C1	ResliceofSD569_L05_m67_a4_003_Max_Reg-6_C2			ResliceofSD569_L05_m67_a4_003_Max_Reg-1_C1	ResliceofSD569_L05_m67_a4_003_Max_Reg-1_C2	ResliceofSD569_L05_m67_a4_003_Max_Reg-3_C1	ResliceofSD569_L05_m67_a4_003_Max_Reg-3_C2	ResliceofSD569_L05_m67_a4_003_Max_Reg-6_C1	ResliceofSD569_L05_m67_a4_003_Max_Reg-6_C2
1381.43	1889.71	1028.57	1182.57	1360.14	1078.71			0	0.0443287	0.287033	-0.0140544	-0.171212	0.081671	-0.288197		0	0.5	0.583395	0.492358	0.216119	0.746188	0.101941
1508.43	2082.29	1018.43	1200.71	1271.57	1170.43			2.2	0.140338	0.418188	-0.0237769	-0.158496	0.0112334	-0.227678		2.2	0.75979	0.726876	0.47298	0.233736	0.536089	0.176993
1467.71	2087.71	1028.86	1197.29	1259.43	1351			4.4	0.109559	0.421885	-0.0137805	-0.160899	0.00157667	-0.108526		4.4	0.676505	0.730921	0.492904	0.230406	0.507286	0.32476
1492	2125.57	1031	960	1313.14	1425.71			6.6	0.127918	0.447669	-0.0117265	-0.327198	0.0442936	-0.0592244		6.6	0.726184	0.759127	0.496998	0	0.6347	0.385901
1424.43	2345.29	964.429	1083	1359.57	1370.14			8.8	0.0768357	0.59731	-0.0755391	-0.240995	0.0812166	-0.0958939		8.8	0.58796	0.922831	0.369814	0.119434	0.744832	0.340426
1503.29	2448.86	1145.57	1143.43	1414.43	1500.71			11	0.13645	0.66785	0.0980969	-0.198644	0.124842	-0.0097347		11	0.749269	1	0.715884	0.178111	0.874958	0.447276
1461	2128.29	1178.86	1165	1412.14	1467.14			13.2	0.104483	0.449518	0.130003	-0.183526	0.123025	-0.0318872		13.2	0.66277	0.76115	0.779476	0.199057	0.869536	0.419804
1513.86	1824.29	992	1140.14	1463	1738.29			15.4	0.144442	0.242471	-0.0491102	-0.200947	0.163469	0.14703		15.4	0.770894	0.534646	0.422489	0.17492	0.990173	0.641688
1625.86	1784.43	1007.14	1204.57	1282.29	1698.43			17.6	0.229111	0.215326	-0.0345949	-0.155793	0.0197541	0.12073		17.6	1	0.504949	0.451419	0.237481	0.561505	0.609072
1613.43	1642.43	1197.86	1454.86	1275.86	1850.43			19.8	0.219715	0.118613	0.148216	0.0196161	0.0146417	0.221029		19.8	0.974576	0.399148	0.815775	0.48051	0.546256	0.733458
1594	1582.57	1192.57	1407.43	1467.14	1769.29			22	0.205028	0.0778464	0.143149	-0.0136236	0.166764	0.167486		22	0.934833	0.35455	0.805677	0.434457	1	0.667056
1426.86	1541.71	1167.43	1393.29	1415.71	1683.29			24.2	0.0786717	0.0500197	0.119048	-0.0235354	0.125865	0.110737		24.2	0.592928	0.324109	0.757642	0.420724	0.878007	0.59668
1406.43	1291.71	1127.14	1572.43	1376.29	1755.14			26.4	0.0632282	-0.120249	0.0804321	0.102014	0.0945088	0.158153		26.4	0.55114	0.137839	0.680677	0.594673	0.78448	0.655483
1339	1294.14	1199.86	1309.14	1440.29	1900.86			28.6	0.0122537	-0.118594	0.150133	-0.0825057	0.145406	0.254305		28.6	0.413209	0.139649	0.819596	0.339021	0.936293	0.774725
1330.57	1312	1223.29	1543.14	1459.57	1823.71			30.8	0.00588187	-0.106432	0.172591	0.0814899	0.160743	0.203401		30.8	0.395967	0.152954	0.864356	0.566237	0.98204	0.711597
1307.86	1107.43	1156.43	1675.29	1310.29	1922			33	-0.0112896	-0.24576	0.108504	0.1741	0.0420215	0.268256		33	0.349503	0.000532198	0.736627	0.694548	0.627923	0.792027
1245	1196.14	1294.29	1748.57	1239.71	1872.57			35.2	-0.0588082	-0.18534	0.240648	0.225462	-0.0141014	0.23564		35.2	0.220923	0.0666312	1	0.76571	0.460522	0.751578
1253.14	1172.71	1236.71	1713.43	1250	1895.86			37.4	-0.0526524	-0.201296	0.185463	0.200832	-0.00592152	0.251005		37.4	0.23758	0.0491751	0.890011	0.731586	0.48492	0.770634
1281.14	1199.86	1229.57	1801.86	1161.57	2001			39.6	-0.031485	-0.18281	0.178616	0.262806	-0.0762455	0.320385		39.6	0.294857	0.0693986	0.876365	0.81745	0.275161	0.856675
1223.57	1248.14	1199.14	1989.86	1166.71	2069.14			41.8	-0.0750077	-0.149924	0.149448	0.394563	-0.0721556	0.36535		41.8	0.177089	0.105375	0.818231	1	0.28736	0.912439
1326	1367.86	1120.86	1989	1181.14	1720.86			44	0.00242598	-0.0683897	0.0744068	0.393963	-0.060681	0.135529		44	0.386616	0.194572	0.668668	0.999168	0.321586	0.627426
1231.29	1263.29	972.286	1913.43	1210.14	2176.14			46.2	-0.0691759	-0.13961	-0.0680075	0.340999	-0.0376184	0.435955		46.2	0.19287	0.116658	0.384825	0.925787	0.390376	1
1266.43	1303.43	1079.29	1834.14	1232.29	1682.57			48.4	-0.0426087	-0.11227	0.0345582	0.285433	-0.020009	0.110266		48.4	0.264757	0.146567	0.589247	0.8488	0.442901	0.596095
1190.57	1287.86	1059.29	1920.29	1182.86	1642.29			50.6	-0.099955	-0.122876	0.015387	0.345805	-0.0593177	0.083683		50.6	0.109585	0.134965	0.551037	0.932446	0.325652	0.563128
1245.29	1304	1110.57	1981.29	1045.57	1648.71			52.8	-0.0585922	-0.111881	0.0645474	0.388556	-0.168496	0.087925		52.8	0.221508	0.146993	0.649017	0.991677	0	0.568389
1232.57	1222.14	1024.43	1711.71	1147.71	1498.14			55	-0.0682039	-0.167632	-0.0180256	0.199631	-0.0872655	-0.0114315		55	0.1955	0.0860032	0.484443	0.729921	0.242291	0.445172
1137	1279.14	1086.14	1739.71	1134.86	1546.71			57.2	-0.140454	-0.128811	0.0411312	0.219254	-0.0974904	0.020619		57.2	0	0.128473	0.602347	0.757109	0.211793	0.484919
1227.29	1313.29	943.714	1677.57	1283.71	1446.57			59.4	-0.0721998	-0.105557	-0.0953949	0.175702	0.0208902	-0.0454615		59.4	0.184687	0.153912	0.33024	0.696768	0.564893	0.402969
1296.71	1248	972.714	1495	1180.43	1469.86			61.6	-0.0197134	-0.150021	-0.0675967	0.0477496	-0.0612491	-0.0300962		61.6	0.32671	0.105269	0.385644	0.51949	0.319892	0.422025
1234.57	1106.71	959.286	1545.29	1138.29	1300.14			63.8	-0.066692	-0.246247	-0.0804688	0.0829917	-0.0947637	-0.142084		63.8	0.199591	0	0.359989	0.568317	0.219925	0.283142
1197.14	1296.29	910.143	1372.43	1050.14	1224.57			66	-0.0949871	-0.117135	-0.127575	-0.0381528	-0.16486	-0.191951		66	0.123027	0.141245	0.266103	0.400472	0.0108438	0.2213
1322.43	1226.14	933.571	1254.43	1232.57	1396.14			68.2	-0.000273943	-0.164907	-0.105117	-0.120851	-0.0197818	-0.0787375		68.2	0.37931	0.0889835	0.310862	0.285893	0.443578	0.361702
1216.43	1360.57	945	1311.14	1152	1268.57			70.4	-0.0804075	-0.0733518	-0.0941625	-0.081104	-0.0838573	-0.162917		70.4	0.162478	0.189143	0.332697	0.340963	0.252457	0.257307
1272	1302	988.286	1157	1286.71	1126			72.6	-0.0383968	-0.113243	-0.0526706	-0.189133	0.023276	-0.256995		72.6	0.276154	0.145503	0.415393	0.191289	0.572009	0.140636
1189.29	1357.43	770.857	1209.43	1253	1258			74.8	-0.100927	-0.0754923	-0.261089	-0.152389	-0.00353573	-0.169893		74.8	0.106955	0.186801	0	0.242197	0.492037	0.248656
1189.43	1512.14	936.143	1254.71	1255.29	1186.29			77	-0.100819	0.0298794	-0.102653	-0.120651	-0.00171799	-0.217214		77	0.107247	0.302076	0.315775	0.28617	0.497458	0.18997
1197.71	1366.29	872	1072.14	1299.57	1160.14			79.2	-0.0945551	-0.0694599	-0.164137	-0.248604	0.0335008	-0.234465		79.2	0.124196	0.193401	0.193231	0.108892	0.602508	0.168576
1229	1191.86	811	1120.43	1097.57	1098			81.4	-0.0709038	-0.188258	-0.222609	-0.214763	-0.127142	-0.275471		81.4	0.188194	0.063438	0.0766921	0.155778	0.123348	0.117723
1158.86	1201.57	889	1032.14	1182	954.143			83.6	-0.12393	-0.181642	-0.147842	-0.276637	-0.0599994	-0.370397		83.6	0.0447107	0.0706759	0.22571	0.0700513	0.323619	0
1198.57	1169.43	896.429	997	1092.86	1005.71			85.8	-0.0939071	-0.203534	-0.140721	-0.301267	-0.130891	-0.336367		85.8	0.12595	0.046727	0.239902	0.0359273	0.112165	0.0422025
1276.86	1214.43	872.429	1027.29	1217.71	980.714			88	-0.0347249	-0.172886	-0.163726	-0.280041	-0.0315971	-0.352863		88	0.28609	0.0802555	0.19405	0.065335	0.408336	0.0217442
