# Supplementary material for: An autoinhibitory clamp of actin assembly constrains and directs synaptic endocytosis
Source: eLife journal article supplement (doi:10.7554/elife.69597), 2021-07-29
Supplement: fig7-data1 [file Figure 7DE_source data_shiTS-GMA.xlsx]

## Sheet: WholeNMJData
	new Thresh						new Thresh
	0.57				Threshold/AFU:	0.395378	0.32
		File	CellArea	Ch1Mean	Ch1CoV
	Con_01m_m67_a3_001	Con_01m_m67_a3_001_Max_ Reg_ BC_ BC_GB-75.tif	39.4311	497.824	0.4944	196.828	159.304
	Con_01m_m67_a3_003	Con_01m_m67_a3_003_Max_ Reg_ BC_ BC_GB-75.tif	73.0489	194.854	0.55335	77.0408	62.3532
	con_02m_m67_a3_002	con_02m_m67_a3_002_Max_ Reg_ BC_ BC_GB-75.tif	47.3956	276.406	0.59371	109.285	88.4499
	con_03m_m67_a3_001	con_03m_m67_a3_001_Max_ Reg_ BC_ BC_GB-75.tif	117.973	356.482	0.73968	140.945	114.074
	con_03m_m67_a3_002	con_03m_m67_a3_002_Max_ Reg_ BC_ BC_GB-75.tif	46.0267	345.094	0.59997	136.442	110.43
	con_03m_m67_a3_003	con_03m_m67_a3_003_Max_ Reg_ BC_ BC_GB-75.tif	50.7911	309.828	0.5318	122.499	99.1449
	con_04m_m67_a3_002	con_04m_m67_a3_002_Max_ Reg_ BC_ BC_GB-75.tif	83.0933	365.882	0.48975	144.662	117.082
	con_04m_m67_a3_003	con_04m_m67_a3_003_Max_ Reg_ BC_ BC_GB-75.tif	50.88	276.526	0.53582	109.332	88.4883
	con_05m_m67_a3_001	con_05m_m67_a3_001_Max_ Reg_ BC_ BC_GB-75.tif	58.6311	304.82	0.53556	120.519	97.5426
	con_06m_m67_a3_001	con_06m_m67_a3_001_Max_ Reg_ BC-1-111_ BC_GB-75.tif	45.8667	411.949	0.5337	162.875	131.824
	con_06m_m67_a3_002	con_06m_m67_a3_002_Max_ Reg_ BC_ BC_GB-75.tif	60.1778	355.508	0.56983	140.56	113.763
	con_07m_m67_a3_001	con_07m_m67_a3_001_Max_ Reg_ BC_ BC_GB-75.tif	42.8267	484.059	0.67617	191.386	154.899
	con_07m_m67_a3_002	con_07m_m67_a3_002_Max_ Reg_ BC_ BC_GB-75.tif	56.2844	303.528	0.60324	120.008	97.1289
	con_07m_m67_a3_003	con_07m_m67_a3_003_Max_ Reg_ BC_ BC_GB-75.tif	45.7244	227.988	0.51108	90.1415	72.9563
	con_08m_m67_a3_002	con_08m_m67_a3_002_Max_ Reg_ BC_ BC_GB-75.tif	89.6711	318.361	0.59238	125.873	101.876
	con_08m_m67_a3_003	con_08m_m67_a3_003_Max_ Reg_ BC_ BC_GB-75.tif	150.418	242.01	0.52199	95.6854	77.4433
	shi_01m_m67_a3_001	shi_01m_m67_a3_001_Max_ Reg_ BC_ BC_GB-75.tif	86.9511	412.99	0.66992	163.287	132.157
	shi_01m_m67_a3_002	shi_01m_m67_a3_002_Max_ Reg_ BC_ BC_GB-75.tif	29.2267	338.849	0.55309	133.973	108.432
	shi_01m_m67_a3_003	shi_01m_m67_a3_003_Max_ Reg_ BC_ BC_GB-75.tif	59.4311	253.177	0.62141	100.1	81.0166
	shi_02m_m67_a3_001	shi_02m_m67_a3_001_Max_ Reg_ BC_ BC_GB-75.tif	121.618	303.434	0.70578	119.971	97.0989
	shi_02m_m67_a3_003	shi_02m_m67_a3_003_Max_ Reg_ BCcrop_ BC_GB-75.tif	48.2667	221.696	0.26195	87.6536	70.9427
	shi_03m_m67_a3_001	shi_03m_m67_a3_001_Max_ Reg_ BC_ BC_GB-75.tif	103.893	279.531	0.51845	110.52	89.4498
	shi_03m_m67_a3_002	shi_03m_m67_a3_002_Max_ Reg_ BC_ BC_GB-75.tif	112.053	285.326	0.57593	112.812	91.3043
	shi_03m_m67_a3_003	shi_03m_m67_a3_003_Max_ Reg_ BC_ BC_GB-75.tif	101.973	349.283	0.41769	138.099	111.77
	shi_04m_m67_a3_001	shi_04m_m67_a3_001_Max_ Reg_ BC_ BC_GB-75.tif	152	283.752	0.53608	112.189	90.8005
	shi_04m_m67_a3_002	shi_04m_m67_a3_002_Max_ Reg_ BC_ BC_GB-75.tif	23.9822	245.973	0.43873	97.2523	78.7115
	shi_04m_m67_a3_003	shi_04m_m67_a3_003_Max_ Reg_ BC_ BC_GB-75.tif	74.6133	212.7	0.54503	84.0969	68.0641
	shi_05m_m67_a3_001	shi_05m_m67_a3_001_Max_ Reg_ BC_ BC_GB-75.tif	105.191	256.404	0.42926	101.376	82.0493
	shi_05m_m67_a3_002	shi_05m_m67_a3_002_Max_ Reg_ BC_ BC_GB-75.tif	185.778	216.365	0.53233	85.5458	69.2368
	shi_05m_m67_a3_003	shi_05m_m67_a3_003_Max_ Reg_ BC_ BC_GB-75.tif	48.4089	171.689	0.45106	67.8821	54.9406
	shi_06m_m67_a3_001	shi_06m_m67_a3_001_Max_ Reg_ BC_ BC_GB-75.tif	166.738	311.31	0.5378	123.085	99.6194
	shi_06m_m67_a3_002	shi_06m_m67_a3_002_Max_ Reg_ BC_ BC_GB-75.tif	142.436	175.107	0.52377	69.2336	56.0344
	shi_06m_m67_a3_003	shi_06m_m67_a3_003_Max_ Reg_ BC_ BC_GB-75.tif	174.009	179.683	0.53388	71.0428	57.4987
	shi_07m_m67_a3_001	shi_07m_m67_a3_001_Max_ Reg_ BC_ BC_GB-75.tif	78.72	248.785	0.57988	98.364	79.6112
	shi_07m_m67_a3_002	shi_07m_m67_a3_002_Max_ Reg_ BC_ BC_GB-75.tif	114.596	273.861	0.6811	108.278	87.6355

## Sheet: RawPTData
			17.3583
			25.9775
		NMJ-ROI	Duration	MeanIntensity	NormIntensityRange	NMJMean	NormPatchInt	NMJArea
	Con_01m_m67_a3_001	Con_01m_m67_a3_001.xlsx_RoiSetAuto-1.zip Distance px	7	4062.62	0.342224	497.824	8.16077	39.4311
	Con_01m_m67_a3_001	Con_01m_m67_a3_001.xlsx_RoiSetAuto-10.zip Distance px	3	3992.36	0.407899	497.824	8.01963	39.4311
	Con_01m_m67_a3_001	Con_01m_m67_a3_001.xlsx_RoiSetAuto-11.zip Distance px	4	3882.12	0.361497	497.824	7.79818	39.4311
	Con_01m_m67_a3_001	Con_01m_m67_a3_001.xlsx_RoiSetAuto-12.zip Distance px	5	4214.94	0.732152	497.824	8.46673	39.4311
	Con_01m_m67_a3_001	Con_01m_m67_a3_001.xlsx_RoiSetAuto-13.zip Distance px	19	5226.72	0.502305	497.824	10.4991	39.4311
	Con_01m_m67_a3_001	Con_01m_m67_a3_001.xlsx_RoiSetAuto-14.zip Distance px	15	5818.61	0.406434	497.824	11.6881	39.4311
	Con_01m_m67_a3_001	Con_01m_m67_a3_001.xlsx_RoiSetAuto-15.zip Distance px	30	4771.49	0.632692	497.824	9.58469	39.4311
	Con_01m_m67_a3_001	Con_01m_m67_a3_001.xlsx_RoiSetAuto-16.zip Distance px	7	5169.56	0.42543	497.824	10.3843	39.4311
	Con_01m_m67_a3_001	Con_01m_m67_a3_001.xlsx_RoiSetAuto-17.zip Distance px	6	4032.68	0.20369	497.824	8.10063	39.4311
	Con_01m_m67_a3_001	Con_01m_m67_a3_001.xlsx_RoiSetAuto-18.zip Distance px	45	5437.68	0.701333	497.824	10.9229	39.4311
	Con_01m_m67_a3_001	Con_01m_m67_a3_001.xlsx_RoiSetAuto-19.zip Distance px	8	4918.22	0.249419	497.824	9.87943	39.4311
	Con_01m_m67_a3_001	Con_01m_m67_a3_001.xlsx_RoiSetAuto-2.zip Distance px	23	4870.47	1.09956	497.824	9.78353	39.4311
	Con_01m_m67_a3_001	Con_01m_m67_a3_001.xlsx_RoiSetAuto-20.zip Distance px	5	3242.28	0.245071	497.824	6.51291	39.4311
	Con_01m_m67_a3_001	Con_01m_m67_a3_001.xlsx_RoiSetAuto-21.zip Distance px	20	4581.69	0.810862	497.824	9.20343	39.4311
	Con_01m_m67_a3_001	Con_01m_m67_a3_001.xlsx_RoiSetAuto-22.zip Distance px	4	4025.11	0.23744	497.824	8.08542	39.4311
	Con_01m_m67_a3_001	Con_01m_m67_a3_001.xlsx_RoiSetAuto-23.zip Distance px	14	4472.67	0.610702	497.824	8.98445	39.4311
	Con_01m_m67_a3_001	Con_01m_m67_a3_001.xlsx_RoiSetAuto-24.zip Distance px	17	4173.73	0.569339	497.824	8.38395	39.4311
	Con_01m_m67_a3_001	Con_01m_m67_a3_001.xlsx_RoiSetAuto-25.zip Distance px	43	5004.87	0.600081	497.824	10.0535	39.4311
	Con_01m_m67_a3_001	Con_01m_m67_a3_001.xlsx_RoiSetAuto-26.zip Distance px	10	4988.35	0.373731	497.824	10.0203	39.4311
	Con_01m_m67_a3_001	Con_01m_m67_a3_001.xlsx_RoiSetAuto-27.zip Distance px	54	6496.49	0.881857	497.824	13.0498	39.4311
	Con_01m_m67_a3_001	Con_01m_m67_a3_001.xlsx_RoiSetAuto-28.zip Distance px	7	4159.32	0.20201	497.824	8.355	39.4311
	Con_01m_m67_a3_001	Con_01m_m67_a3_001.xlsx_RoiSetAuto-29.zip Distance px	9	4278.06	0.438338	497.824	8.59352	39.4311
	Con_01m_m67_a3_001	Con_01m_m67_a3_001.xlsx_RoiSetAuto-3.zip Distance px	210	8128.53	0.896206	497.824	16.3281	39.4311
	Con_01m_m67_a3_001	Con_01m_m67_a3_001.xlsx_RoiSetAuto-30.zip Distance px	11	4212.12	0.452928	497.824	8.46108	39.4311
	Con_01m_m67_a3_001	Con_01m_m67_a3_001.xlsx_RoiSetAuto-31.zip Distance px	3	3890.97	0.13052	497.824	7.81595	39.4311
	Con_01m_m67_a3_001	Con_01m_m67_a3_001.xlsx_RoiSetAuto-32.zip Distance px	42	4514.81	0.806762	497.824	9.0691	39.4311
	Con_01m_m67_a3_001	Con_01m_m67_a3_001.xlsx_RoiSetAuto-33.zip Distance px	4	4031.91	0.210941	497.824	8.09907	39.4311
	Con_01m_m67_a3_001	Con_01m_m67_a3_001.xlsx_RoiSetAuto-34.zip Distance px	3	3850.17	0.174217	497.824	7.734	39.4311
	Con_01m_m67_a3_001	Con_01m_m67_a3_001.xlsx_RoiSetAuto-35.zip Distance px	6	4475.11	0.462537	497.824	8.98936	39.4311
	Con_01m_m67_a3_001	Con_01m_m67_a3_001.xlsx_RoiSetAuto-36.zip Distance px	41	4754.75	0.912443	497.824	9.55107	39.4311
	Con_01m_m67_a3_001	Con_01m_m67_a3_001.xlsx_RoiSetAuto-37.zip Distance px	60	6783.95	0.723555	497.824	13.6272	39.4311
	Con_01m_m67_a3_001	Con_01m_m67_a3_001.xlsx_RoiSetAuto-38.zip Distance px	11	4703.28	0.649504	497.824	9.44769	39.4311
	Con_01m_m67_a3_001	Con_01m_m67_a3_001.xlsx_RoiSetAuto-39.zip Distance px	8	4313	0.680304	497.824	8.66371	39.4311
	Con_01m_m67_a3_001	Con_01m_m67_a3_001.xlsx_RoiSetAuto-4.zip Distance px	5	3614.16	0.426141	497.824	7.25993	39.4311
	Con_01m_m67_a3_001	Con_01m_m67_a3_001.xlsx_RoiSetAuto-40.zip Distance px	34	6043.01	0.723124	497.824	12.1389	39.4311
	Con_01m_m67_a3_001	Con_01m_m67_a3_001.xlsx_RoiSetAuto-41.zip Distance px	11	4332.4	0.386901	497.824	8.70268	39.4311
	Con_01m_m67_a3_001	Con_01m_m67_a3_001.xlsx_RoiSetAuto-42.zip Distance px	3	3768.84	0.118424	497.824	7.57064	39.4311
	Con_01m_m67_a3_001	Con_01m_m67_a3_001.xlsx_RoiSetAuto-43.zip Distance px	3	4305.35	0.456151	497.824	8.64835	39.4311
	Con_01m_m67_a3_001	Con_01m_m67_a3_001.xlsx_RoiSetAuto-44.zip Distance px	7	4124.56	0.558181	497.824	8.28519	39.4311
	Con_01m_m67_a3_001	Con_01m_m67_a3_001.xlsx_RoiSetAuto-45.zip Distance px	46	7527.71	0.602377	497.824	15.1212	39.4311
	Con_01m_m67_a3_001	Con_01m_m67_a3_001.xlsx_RoiSetAuto-46.zip Distance px	26	5025.07	0.441121	497.824	10.0941	39.4311
	Con_01m_m67_a3_001	Con_01m_m67_a3_001.xlsx_RoiSetAuto-47.zip Distance px	54	6388.26	0.938006	497.824	12.8324	39.4311
	Con_01m_m67_a3_001	Con_01m_m67_a3_001.xlsx_RoiSetAuto-48.zip Distance px	7	4651.75	0.560473	497.824	9.34417	39.4311
	Con_01m_m67_a3_001	Con_01m_m67_a3_001.xlsx_RoiSetAuto-49.zip Distance px	8	4014.22	0.348594	497.824	8.06354	39.4311
	Con_01m_m67_a3_001	Con_01m_m67_a3_001.xlsx_RoiSetAuto-5.zip Distance px	4	3837.24	0.48884	497.824	7.70803	39.4311
	Con_01m_m67_a3_001	Con_01m_m67_a3_001.xlsx_RoiSetAuto-50.zip Distance px	57	6536.54	0.633503	497.824	13.1302	39.4311
	Con_01m_m67_a3_001	Con_01m_m67_a3_001.xlsx_RoiSetAuto-51.zip Distance px	3	4262.99	0.233834	497.824	8.56325	39.4311
	Con_01m_m67_a3_001	Con_01m_m67_a3_001.xlsx_RoiSetAuto-52.zip Distance px	14	4722.11	0.536275	497.824	9.4855	39.4311
	Con_01m_m67_a3_001	Con_01m_m67_a3_001.xlsx_RoiSetAuto-53.zip Distance px	4	3955.84	0.354143	497.824	7.94626	39.4311
	Con_01m_m67_a3_001	Con_01m_m67_a3_001.xlsx_RoiSetAuto-54.zip Distance px	6	4906.45	0.541895	497.824	9.8558	39.4311
	Con_01m_m67_a3_001	Con_01m_m67_a3_001.xlsx_RoiSetAuto-55.zip Distance px	56	6846.95	0.990452	497.824	13.7538	39.4311
	Con_01m_m67_a3_001	Con_01m_m67_a3_001.xlsx_RoiSetAuto-56.zip Distance px	3	3978.26	0.218178	497.824	7.9913	39.4311
	Con_01m_m67_a3_001	Con_01m_m67_a3_001.xlsx_RoiSetAuto-57.zip Distance px	4	4452.75	0.338392	497.824	8.94443	39.4311
	Con_01m_m67_a3_001	Con_01m_m67_a3_001.xlsx_RoiSetAuto-58.zip Distance px	3	4098.91	0.312716	497.824	8.23367	39.4311
	Con_01m_m67_a3_001	Con_01m_m67_a3_001.xlsx_RoiSetAuto-59.zip Distance px	10	4171.9	0.345253	497.824	8.38027	39.4311
	Con_01m_m67_a3_001	Con_01m_m67_a3_001.xlsx_RoiSetAuto-6.zip Distance px	7	3408.73	0.414464	497.824	6.84726	39.4311
	Con_01m_m67_a3_001	Con_01m_m67_a3_001.xlsx_RoiSetAuto-60.zip Distance px	3	3824.7	0.204993	497.824	7.68284	39.4311
	Con_01m_m67_a3_001	Con_01m_m67_a3_001.xlsx_RoiSetAuto-61.zip Distance px	23	4602.17	0.480713	497.824	9.24457	39.4311
	Con_01m_m67_a3_001	Con_01m_m67_a3_001.xlsx_RoiSetAuto-62.zip Distance px	4	4217.73	0.290424	497.824	8.47233	39.4311
	Con_01m_m67_a3_001	Con_01m_m67_a3_001.xlsx_RoiSetAuto-63.zip Distance px	40	4743.52	1.09036	497.824	9.52852	39.4311
	Con_01m_m67_a3_001	Con_01m_m67_a3_001.xlsx_RoiSetAuto-64.zip Distance px	44	5858.23	0.912366	497.824	11.7677	39.4311
	Con_01m_m67_a3_001	Con_01m_m67_a3_001.xlsx_RoiSetAuto-65.zip Distance px	4	4196.22	0.461245	497.824	8.42913	39.4311
	Con_01m_m67_a3_001	Con_01m_m67_a3_001.xlsx_RoiSetAuto-66.zip Distance px	4	4366.63	0.324069	497.824	8.77145	39.4311
	Con_01m_m67_a3_001	Con_01m_m67_a3_001.xlsx_RoiSetAuto-67.zip Distance px	17	5296.73	0.525863	497.824	10.6398	39.4311
	Con_01m_m67_a3_001	Con_01m_m67_a3_001.xlsx_RoiSetAuto-68.zip Distance px	5	4552.09	0.183616	497.824	9.14398	39.4311
	Con_01m_m67_a3_001	Con_01m_m67_a3_001.xlsx_RoiSetAuto-69.zip Distance px	6	4523.56	0.68072	497.824	9.08667	39.4311
	Con_01m_m67_a3_001	Con_01m_m67_a3_001.xlsx_RoiSetAuto-7.zip Distance px	6	5119.26	0.279161	497.824	10.2833	39.4311
	Con_01m_m67_a3_001	Con_01m_m67_a3_001.xlsx_RoiSetAuto-70.zip Distance px	22	5403.08	0.703067	497.824	10.8534	39.4311
	Con_01m_m67_a3_001	Con_01m_m67_a3_001.xlsx_RoiSetAuto-71.zip Distance px	9	4480.24	0.44268	497.824	8.99966	39.4311
	Con_01m_m67_a3_001	Con_01m_m67_a3_001.xlsx_RoiSetAuto-72.zip Distance px	11	4420.99	0.431877	497.824	8.88064	39.4311
	Con_01m_m67_a3_001	Con_01m_m67_a3_001.xlsx_RoiSetAuto-73.zip Distance px	22	7722.75	0.40326	497.824	15.513	39.4311
	Con_01m_m67_a3_001	Con_01m_m67_a3_001.xlsx_RoiSetAuto-74.zip Distance px	3	5104.68	0.3762	497.824	10.254	39.4311
	Con_01m_m67_a3_001	Con_01m_m67_a3_001.xlsx_RoiSetAuto-75.zip Distance px	5	4383.93	0.230255	497.824	8.80619	39.4311
	Con_01m_m67_a3_001	Con_01m_m67_a3_001.xlsx_RoiSetAuto-76.zip Distance px	16	4546.45	0.351136	497.824	9.13266	39.4311
	Con_01m_m67_a3_001	Con_01m_m67_a3_001.xlsx_RoiSetAuto-77.zip Distance px	14	4907.01	0.340908	497.824	9.85692	39.4311
	Con_01m_m67_a3_001	Con_01m_m67_a3_001.xlsx_RoiSetAuto-78.zip Distance px	5	6702.22	0.24671	497.824	13.463	39.4311
	Con_01m_m67_a3_001	Con_01m_m67_a3_001.xlsx_RoiSetAuto-8.zip Distance px	25	5509.53	0.767111	497.824	11.0672	39.4311
	Con_01m_m67_a3_001	Con_01m_m67_a3_001.xlsx_RoiSetAuto-9.zip Distance px	9	3950.72	0.407764	497.824	7.93598	39.4311
	Con_01m_m67_a3_003	Con_01m_m67_a3_003.xlsx_RoiSetAuto-1.zip Distance px	3	1322.5	0.595458	194.854	6.78715	73.0489
	Con_01m_m67_a3_003	Con_01m_m67_a3_003.xlsx_RoiSetAuto-100.zip Distance px	3	1483.79	0.219683	194.854	7.61487	73.0489
	Con_01m_m67_a3_003	Con_01m_m67_a3_003.xlsx_RoiSetAuto-101.zip Distance px	10	1807.76	0.924599	194.854	9.27751	73.0489
	Con_01m_m67_a3_003	Con_01m_m67_a3_003.xlsx_RoiSetAuto-102.zip Distance px	3	1506.17	0.302421	194.854	7.72975	73.0489
	Con_01m_m67_a3_003	Con_01m_m67_a3_003.xlsx_RoiSetAuto-103.zip Distance px	5	1740.69	0.462123	194.854	8.93332	73.0489
	Con_01m_m67_a3_003	Con_01m_m67_a3_003.xlsx_RoiSetAuto-12.zip Distance px	117	3232.26	0.9202	194.854	16.5881	73.0489
	Con_01m_m67_a3_003	Con_01m_m67_a3_003.xlsx_RoiSetAuto-15.zip Distance px	8	1466.22	0.330833	194.854	7.52474	73.0489
	Con_01m_m67_a3_003	Con_01m_m67_a3_003.xlsx_RoiSetAuto-17.zip Distance px	5	3229.54	0.274664	194.854	16.5742	73.0489
	Con_01m_m67_a3_003	Con_01m_m67_a3_003.xlsx_RoiSetAuto-18.zip Distance px	4	1579.17	0.434289	194.854	8.10437	73.0489
	Con_01m_m67_a3_003	Con_01m_m67_a3_003.xlsx_RoiSetAuto-19.zip Distance px	8	1548.56	0.477658	194.854	7.94728	73.0489
	Con_01m_m67_a3_003	Con_01m_m67_a3_003.xlsx_RoiSetAuto-2.zip Distance px	6	1797.26	0.650315	194.854	9.22366	73.0489
	Con_01m_m67_a3_003	Con_01m_m67_a3_003.xlsx_RoiSetAuto-20.zip Distance px	23	1592.11	0.542411	194.854	8.17077	73.0489
	Con_01m_m67_a3_003	Con_01m_m67_a3_003.xlsx_RoiSetAuto-21.zip Distance px	41	1723.45	0.743662	194.854	8.84484	73.0489
	Con_01m_m67_a3_003	Con_01m_m67_a3_003.xlsx_RoiSetAuto-23.zip Distance px	6	1762.71	0.381635	194.854	9.0463	73.0489
	Con_01m_m67_a3_003	Con_01m_m67_a3_003.xlsx_RoiSetAuto-24.zip Distance px	21	1632.35	0.559188	194.854	8.3773	73.0489
	Con_01m_m67_a3_003	Con_01m_m67_a3_003.xlsx_RoiSetAuto-25.zip Distance px	176	2291.54	1.17015	194.854	11.7603	73.0489
	Con_01m_m67_a3_003	Con_01m_m67_a3_003.xlsx_RoiSetAuto-28.zip Distance px	19	1643.62	0.607144	194.854	8.43516	73.0489
	Con_01m_m67_a3_003	Con_01m_m67_a3_003.xlsx_RoiSetAuto-29.zip Distance px	25	1856.93	0.790303	194.854	9.52988	73.0489
	Con_01m_m67_a3_003	Con_01m_m67_a3_003.xlsx_RoiSetAuto-3.zip Distance px	6	1920.88	0.402998	194.854	9.85806	73.0489
	Con_01m_m67_a3_003	Con_01m_m67_a3_003.xlsx_RoiSetAuto-30.zip Distance px	14	1591.03	0.592528	194.854	8.16527	73.0489
	Con_01m_m67_a3_003	Con_01m_m67_a3_003.xlsx_RoiSetAuto-31.zip Distance px	3	1632.99	0.647653	194.854	8.3806	73.0489
	Con_01m_m67_a3_003	Con_01m_m67_a3_003.xlsx_RoiSetAuto-32.zip Distance px	12	1717.84	0.419042	194.854	8.81607	73.0489
	Con_01m_m67_a3_003	Con_01m_m67_a3_003.xlsx_RoiSetAuto-33.zip Distance px	18	1897.53	0.922937	194.854	9.73824	73.0489
	Con_01m_m67_a3_003	Con_01m_m67_a3_003.xlsx_RoiSetAuto-34.zip Distance px	74	2788.73	0.963863	194.854	14.3119	73.0489
	Con_01m_m67_a3_003	Con_01m_m67_a3_003.xlsx_RoiSetAuto-35.zip Distance px	9	1761.32	0.425402	194.854	9.03919	73.0489
	Con_01m_m67_a3_003	Con_01m_m67_a3_003.xlsx_RoiSetAuto-36.zip Distance px	3	1328.74	0.225247	194.854	6.81915	73.0489
	Con_01m_m67_a3_003	Con_01m_m67_a3_003.xlsx_RoiSetAuto-38.zip Distance px	4	1715.64	0.547362	194.854	8.80474	73.0489
	Con_01m_m67_a3_003	Con_01m_m67_a3_003.xlsx_RoiSetAuto-39.zip Distance px	5	1573.58	0.528824	194.854	8.07572	73.0489
	Con_01m_m67_a3_003	Con_01m_m67_a3_003.xlsx_RoiSetAuto-4.zip Distance px	54	3240.52	0.676229	194.854	16.6305	73.0489
	Con_01m_m67_a3_003	Con_01m_m67_a3_003.xlsx_RoiSetAuto-40.zip Distance px	3	1290.38	0.291759	194.854	6.6223	73.0489
	Con_01m_m67_a3_003	Con_01m_m67_a3_003.xlsx_RoiSetAuto-41.zip Distance px	5	1768.4	0.394556	194.854	9.07551	73.0489
	Con_01m_m67_a3_003	Con_01m_m67_a3_003.xlsx_RoiSetAuto-42.zip Distance px	12	1698.94	0.380519	194.854	8.71906	73.0489
	Con_01m_m67_a3_003	Con_01m_m67_a3_003.xlsx_RoiSetAuto-45.zip Distance px	29	1897.42	0.76637	194.854	9.73768	73.0489
	Con_01m_m67_a3_003	Con_01m_m67_a3_003.xlsx_RoiSetAuto-46.zip Distance px	3	1613.78	0.631785	194.854	8.28199	73.0489
	Con_01m_m67_a3_003	Con_01m_m67_a3_003.xlsx_RoiSetAuto-47.zip Distance px	3	1380.47	0.396973	194.854	7.08463	73.0489
	Con_01m_m67_a3_003	Con_01m_m67_a3_003.xlsx_RoiSetAuto-48.zip Distance px	4	1546.38	0.197851	194.854	7.9361	73.0489
	Con_01m_m67_a3_003	Con_01m_m67_a3_003.xlsx_RoiSetAuto-49.zip Distance px	7	1738.98	0.492634	194.854	8.92453	73.0489
	Con_01m_m67_a3_003	Con_01m_m67_a3_003.xlsx_RoiSetAuto-5.zip Distance px	52	1959.72	0.901487	194.854	10.0574	73.0489
	Con_01m_m67_a3_003	Con_01m_m67_a3_003.xlsx_RoiSetAuto-51.zip Distance px	15	2059.95	0.515816	194.854	10.5718	73.0489
	Con_01m_m67_a3_003	Con_01m_m67_a3_003.xlsx_RoiSetAuto-52.zip Distance px	3	1372.41	0.254964	194.854	7.04329	73.0489
	Con_01m_m67_a3_003	Con_01m_m67_a3_003.xlsx_RoiSetAuto-53.zip Distance px	23	1780.03	1.14768	194.854	9.13522	73.0489
	Con_01m_m67_a3_003	Con_01m_m67_a3_003.xlsx_RoiSetAuto-54.zip Distance px	3	1676.77	0.353578	194.854	8.60527	73.0489
	Con_01m_m67_a3_003	Con_01m_m67_a3_003.xlsx_RoiSetAuto-55.zip Distance px	33	2118.6	0.818489	194.854	10.8728	73.0489
	Con_01m_m67_a3_003	Con_01m_m67_a3_003.xlsx_RoiSetAuto-57.zip Distance px	3	1527.62	0.387747	194.854	7.83984	73.0489
	Con_01m_m67_a3_003	Con_01m_m67_a3_003.xlsx_RoiSetAuto-58.zip Distance px	3	1641.98	0.516629	194.854	8.42671	73.0489
	Con_01m_m67_a3_003	Con_01m_m67_a3_003.xlsx_RoiSetAuto-59.zip Distance px	25	2200.96	0.954744	194.854	11.2954	73.0489
	Con_01m_m67_a3_003	Con_01m_m67_a3_003.xlsx_RoiSetAuto-6.zip Distance px	65	2693.47	1.2031	194.854	13.823	73.0489
	Con_01m_m67_a3_003	Con_01m_m67_a3_003.xlsx_RoiSetAuto-60.zip Distance px	22	1668.01	0.589555	194.854	8.56034	73.0489
	Con_01m_m67_a3_003	Con_01m_m67_a3_003.xlsx_RoiSetAuto-61.zip Distance px	17	1812.34	0.695949	194.854	9.30104	73.0489
	Con_01m_m67_a3_003	Con_01m_m67_a3_003.xlsx_RoiSetAuto-64.zip Distance px	11	1687.91	0.648201	194.854	8.66244	73.0489
	Con_01m_m67_a3_003	Con_01m_m67_a3_003.xlsx_RoiSetAuto-65.zip Distance px	9	1626.29	0.871733	194.854	8.34621	73.0489
	Con_01m_m67_a3_003	Con_01m_m67_a3_003.xlsx_RoiSetAuto-66.zip Distance px	4	1808.52	0.235377	194.854	9.28142	73.0489
	Con_01m_m67_a3_003	Con_01m_m67_a3_003.xlsx_RoiSetAuto-67.zip Distance px	4	1847.18	0.604429	194.854	9.47983	73.0489
	Con_01m_m67_a3_003	Con_01m_m67_a3_003.xlsx_RoiSetAuto-68.zip Distance px	8	1688.73	0.665762	194.854	8.66665	73.0489
	Con_01m_m67_a3_003	Con_01m_m67_a3_003.xlsx_RoiSetAuto-69.zip Distance px	3	1504.41	0.438071	194.854	7.72074	73.0489
	Con_01m_m67_a3_003	Con_01m_m67_a3_003.xlsx_RoiSetAuto-7.zip Distance px	9	1706.86	0.870239	194.854	8.75972	73.0489
	Con_01m_m67_a3_003	Con_01m_m67_a3_003.xlsx_RoiSetAuto-71.zip Distance px	22	1882.46	0.710676	194.854	9.66088	73.0489
	Con_01m_m67_a3_003	Con_01m_m67_a3_003.xlsx_RoiSetAuto-72.zip Distance px	3	2004.9	0.634023	194.854	10.2893	73.0489
	Con_01m_m67_a3_003	Con_01m_m67_a3_003.xlsx_RoiSetAuto-73.zip Distance px	9	1848.3	0.357778	194.854	9.48558	73.0489
	Con_01m_m67_a3_003	Con_01m_m67_a3_003.xlsx_RoiSetAuto-74.zip Distance px	4	1955.34	0.476439	194.854	10.0349	73.0489
	Con_01m_m67_a3_003	Con_01m_m67_a3_003.xlsx_RoiSetAuto-75.zip Distance px	6	1504.91	0.344672	194.854	7.72331	73.0489
	Con_01m_m67_a3_003	Con_01m_m67_a3_003.xlsx_RoiSetAuto-76.zip Distance px	9	1517.06	0.591182	194.854	7.78563	73.0489
	Con_01m_m67_a3_003	Con_01m_m67_a3_003.xlsx_RoiSetAuto-77.zip Distance px	15	1488.41	0.342119	194.854	7.6386	73.0489
	Con_01m_m67_a3_003	Con_01m_m67_a3_003.xlsx_RoiSetAuto-79.zip Distance px	9	1628.44	0.848023	194.854	8.35727	73.0489
	Con_01m_m67_a3_003	Con_01m_m67_a3_003.xlsx_RoiSetAuto-8.zip Distance px	35	2281.57	0.758123	194.854	11.7091	73.0489
	Con_01m_m67_a3_003	Con_01m_m67_a3_003.xlsx_RoiSetAuto-80.zip Distance px	15	2211.55	0.855894	194.854	11.3498	73.0489
	Con_01m_m67_a3_003	Con_01m_m67_a3_003.xlsx_RoiSetAuto-81.zip Distance px	19	2101.06	0.857192	194.854	10.7828	73.0489
	Con_01m_m67_a3_003	Con_01m_m67_a3_003.xlsx_RoiSetAuto-83.zip Distance px	4	1736.22	0.36449	194.854	8.91038	73.0489
	Con_01m_m67_a3_003	Con_01m_m67_a3_003.xlsx_RoiSetAuto-86.zip Distance px	17	1741.93	0.750357	194.854	8.93967	73.0489
	Con_01m_m67_a3_003	Con_01m_m67_a3_003.xlsx_RoiSetAuto-87.zip Distance px	7	1697.73	0.674239	194.854	8.71287	73.0489
	Con_01m_m67_a3_003	Con_01m_m67_a3_003.xlsx_RoiSetAuto-88.zip Distance px	11	1712.39	0.853095	194.854	8.78806	73.0489
	Con_01m_m67_a3_003	Con_01m_m67_a3_003.xlsx_RoiSetAuto-89.zip Distance px	3	1781.74	0.246782	194.854	9.14397	73.0489
	Con_01m_m67_a3_003	Con_01m_m67_a3_003.xlsx_RoiSetAuto-9.zip Distance px	5	1494.29	0.288595	194.854	7.66877	73.0489
	Con_01m_m67_a3_003	Con_01m_m67_a3_003.xlsx_RoiSetAuto-90.zip Distance px	4	1581.99	0.377371	194.854	8.11887	73.0489
	Con_01m_m67_a3_003	Con_01m_m67_a3_003.xlsx_RoiSetAuto-92.zip Distance px	10	2157.04	0.699022	194.854	11.07	73.0489
	Con_01m_m67_a3_003	Con_01m_m67_a3_003.xlsx_RoiSetAuto-93.zip Distance px	5	1610.71	0.377071	194.854	8.26623	73.0489
	Con_01m_m67_a3_003	Con_01m_m67_a3_003.xlsx_RoiSetAuto-94.zip Distance px	5	1608.27	0.337243	194.854	8.25371	73.0489
	Con_01m_m67_a3_003	Con_01m_m67_a3_003.xlsx_RoiSetAuto-95.zip Distance px	9	1573.27	0.66231	194.854	8.0741	73.0489
	Con_01m_m67_a3_003	Con_01m_m67_a3_003.xlsx_RoiSetAuto-96.zip Distance px	24	2010.53	0.69678	194.854	10.3181	73.0489
	Con_01m_m67_a3_003	Con_01m_m67_a3_003.xlsx_RoiSetAuto-97.zip Distance px	5	1812.44	0.797797	194.854	9.30152	73.0489
	Con_01m_m67_a3_003	Con_01m_m67_a3_003.xlsx_RoiSetAuto-99.zip Distance px	8	1793.61	0.673073	194.854	9.2049	73.0489
	con_02m_m67_a3_002	con_02m_m67_a3_002.xlsx_RoiSetAuto-1.zip Distance px	7	2129.51	0.662657	276.406	7.70429	47.3956
	con_02m_m67_a3_002	con_02m_m67_a3_002.xlsx_RoiSetAuto-10.zip Distance px	3	2234.29	0.220893	276.406	8.08337	47.3956
	con_02m_m67_a3_002	con_02m_m67_a3_002.xlsx_RoiSetAuto-11.zip Distance px	4	2257.49	0.166341	276.406	8.16732	47.3956
	con_02m_m67_a3_002	con_02m_m67_a3_002.xlsx_RoiSetAuto-12.zip Distance px	8	2197.74	0.278754	276.406	7.95114	47.3956
	con_02m_m67_a3_002	con_02m_m67_a3_002.xlsx_RoiSetAuto-13.zip Distance px	7	2215.91	0.36281	276.406	8.01688	47.3956
	con_02m_m67_a3_002	con_02m_m67_a3_002.xlsx_RoiSetAuto-14.zip Distance px	7	2158.84	0.556038	276.406	7.81041	47.3956
	con_02m_m67_a3_002	con_02m_m67_a3_002.xlsx_RoiSetAuto-15.zip Distance px	33	2794.9	0.69477	276.406	10.1116	47.3956
	con_02m_m67_a3_002	con_02m_m67_a3_002.xlsx_RoiSetAuto-16.zip Distance px	34	2934.77	0.853453	276.406	10.6176	47.3956
	con_02m_m67_a3_002	con_02m_m67_a3_002.xlsx_RoiSetAuto-17.zip Distance px	20	2687.72	0.926234	276.406	9.72382	47.3956
	con_02m_m67_a3_002	con_02m_m67_a3_002.xlsx_RoiSetAuto-18.zip Distance px	4	2074.36	0.420375	276.406	7.50475	47.3956
	con_02m_m67_a3_002	con_02m_m67_a3_002.xlsx_RoiSetAuto-19.zip Distance px	3	1869.95	0.377597	276.406	6.76522	47.3956
	con_02m_m67_a3_002	con_02m_m67_a3_002.xlsx_RoiSetAuto-2.zip Distance px	10	2242.33	0.507884	276.406	8.11246	47.3956
	con_02m_m67_a3_002	con_02m_m67_a3_002.xlsx_RoiSetAuto-20.zip Distance px	7	2191.43	0.585023	276.406	7.92829	47.3956
	con_02m_m67_a3_002	con_02m_m67_a3_002.xlsx_RoiSetAuto-21.zip Distance px	51	4924.24	1.43846	276.406	17.8152	47.3956
	con_02m_m67_a3_002	con_02m_m67_a3_002.xlsx_RoiSetAuto-22.zip Distance px	6	2096.91	0.366495	276.406	7.58633	47.3956
	con_02m_m67_a3_002	con_02m_m67_a3_002.xlsx_RoiSetAuto-23.zip Distance px	13	3534.52	1.63831	276.406	12.7874	47.3956
	con_02m_m67_a3_002	con_02m_m67_a3_002.xlsx_RoiSetAuto-24.zip Distance px	111	3525.46	1.07731	276.406	12.7546	47.3956
	con_02m_m67_a3_002	con_02m_m67_a3_002.xlsx_RoiSetAuto-25.zip Distance px	3	1907.8	0.133686	276.406	6.90218	47.3956
	con_02m_m67_a3_002	con_02m_m67_a3_002.xlsx_RoiSetAuto-26.zip Distance px	3	2205.03	0.453984	276.406	7.97753	47.3956
	con_02m_m67_a3_002	con_02m_m67_a3_002.xlsx_RoiSetAuto-27.zip Distance px	65	3043.65	1.12192	276.406	11.0115	47.3956
	con_02m_m67_a3_002	con_02m_m67_a3_002.xlsx_RoiSetAuto-28.zip Distance px	5	2148.73	0.53249	276.406	7.77384	47.3956
	con_02m_m67_a3_002	con_02m_m67_a3_002.xlsx_RoiSetAuto-29.zip Distance px	4	2558.19	0.396903	276.406	9.2552	47.3956
	con_02m_m67_a3_002	con_02m_m67_a3_002.xlsx_RoiSetAuto-3.zip Distance px	60	2990.82	1.106	276.406	10.8204	47.3956
	con_02m_m67_a3_002	con_02m_m67_a3_002.xlsx_RoiSetAuto-30.zip Distance px	15	2286.24	0.675384	276.406	8.27132	47.3956
	con_02m_m67_a3_002	con_02m_m67_a3_002.xlsx_RoiSetAuto-31.zip Distance px	19	3470.58	0.631113	276.406	12.5561	47.3956
	con_02m_m67_a3_002	con_02m_m67_a3_002.xlsx_RoiSetAuto-32.zip Distance px	4	2571.49	0.60287	276.406	9.3033	47.3956
	con_02m_m67_a3_002	con_02m_m67_a3_002.xlsx_RoiSetAuto-33.zip Distance px	3	2449.71	0.592201	276.406	8.86272	47.3956
	con_02m_m67_a3_002	con_02m_m67_a3_002.xlsx_RoiSetAuto-34.zip Distance px	3	2417.39	0.576344	276.406	8.74581	47.3956
	con_02m_m67_a3_002	con_02m_m67_a3_002.xlsx_RoiSetAuto-35.zip Distance px	3	1968.6	0.460694	276.406	7.12213	47.3956
	con_02m_m67_a3_002	con_02m_m67_a3_002.xlsx_RoiSetAuto-36.zip Distance px	13	2708.74	0.634866	276.406	9.79988	47.3956
	con_02m_m67_a3_002	con_02m_m67_a3_002.xlsx_RoiSetAuto-37.zip Distance px	11	2495.5	0.663461	276.406	9.02839	47.3956
	con_02m_m67_a3_002	con_02m_m67_a3_002.xlsx_RoiSetAuto-38.zip Distance px	5	1934.51	0.562065	276.406	6.99879	47.3956
	con_02m_m67_a3_002	con_02m_m67_a3_002.xlsx_RoiSetAuto-4.zip Distance px	148	4284.59	1.17992	276.406	15.5011	47.3956
	con_02m_m67_a3_002	con_02m_m67_a3_002.xlsx_RoiSetAuto-40.zip Distance px	4	2158.39	0.337434	276.406	7.80877	47.3956
	con_02m_m67_a3_002	con_02m_m67_a3_002.xlsx_RoiSetAuto-41.zip Distance px	3	2169.39	0.530273	276.406	7.84855	47.3956
	con_02m_m67_a3_002	con_02m_m67_a3_002.xlsx_RoiSetAuto-42.zip Distance px	8	2129.44	0.412573	276.406	7.70404	47.3956
	con_02m_m67_a3_002	con_02m_m67_a3_002.xlsx_RoiSetAuto-43.zip Distance px	7	3381.43	0.576733	276.406	12.2336	47.3956
	con_02m_m67_a3_002	con_02m_m67_a3_002.xlsx_RoiSetAuto-44.zip Distance px	23	2358.09	0.676545	276.406	8.53125	47.3956
	con_02m_m67_a3_002	con_02m_m67_a3_002.xlsx_RoiSetAuto-45.zip Distance px	3	2470.87	0.35828	276.406	8.93928	47.3956
	con_02m_m67_a3_002	con_02m_m67_a3_002.xlsx_RoiSetAuto-46.zip Distance px	9	3099.21	0.602066	276.406	11.2125	47.3956
	con_02m_m67_a3_002	con_02m_m67_a3_002.xlsx_RoiSetAuto-47.zip Distance px	79	4115.36	1.33826	276.406	14.8888	47.3956
	con_02m_m67_a3_002	con_02m_m67_a3_002.xlsx_RoiSetAuto-48.zip Distance px	19	2663.89	0.842821	276.406	9.63759	47.3956
	con_02m_m67_a3_002	con_02m_m67_a3_002.xlsx_RoiSetAuto-49.zip Distance px	3	2418.49	0.528909	276.406	8.74977	47.3956
	con_02m_m67_a3_002	con_02m_m67_a3_002.xlsx_RoiSetAuto-5.zip Distance px	157	4691.63	1.39915	276.406	16.9737	47.3956
	con_02m_m67_a3_002	con_02m_m67_a3_002.xlsx_RoiSetAuto-50.zip Distance px	5	2273.5	0.417064	276.406	8.22521	47.3956
	con_02m_m67_a3_002	con_02m_m67_a3_002.xlsx_RoiSetAuto-51.zip Distance px	3	2206.7	0.329016	276.406	7.98355	47.3956
	con_02m_m67_a3_002	con_02m_m67_a3_002.xlsx_RoiSetAuto-52.zip Distance px	4	2047.17	0.44203	276.406	7.40638	47.3956
	con_02m_m67_a3_002	con_02m_m67_a3_002.xlsx_RoiSetAuto-53.zip Distance px	34	2677.81	0.966081	276.406	9.68797	47.3956
	con_02m_m67_a3_002	con_02m_m67_a3_002.xlsx_RoiSetAuto-54.zip Distance px	5	2875.34	0.223499	276.406	10.4026	47.3956
	con_02m_m67_a3_002	con_02m_m67_a3_002.xlsx_RoiSetAuto-55.zip Distance px	4	2783.64	0.274254	276.406	10.0708	47.3956
	con_02m_m67_a3_002	con_02m_m67_a3_002.xlsx_RoiSetAuto-56.zip Distance px	17	3303.78	0.902218	276.406	11.9526	47.3956
	con_02m_m67_a3_002	con_02m_m67_a3_002.xlsx_RoiSetAuto-57.zip Distance px	49	3248.37	1.07582	276.406	11.7522	47.3956
	con_02m_m67_a3_002	con_02m_m67_a3_002.xlsx_RoiSetAuto-58.zip Distance px	3	2254.92	0.375785	276.406	8.158	47.3956
	con_02m_m67_a3_002	con_02m_m67_a3_002.xlsx_RoiSetAuto-59.zip Distance px	35	3194.2	0.947116	276.406	11.5562	47.3956
	con_02m_m67_a3_002	con_02m_m67_a3_002.xlsx_RoiSetAuto-6.zip Distance px	16	4546.34	0.471099	276.406	16.448	47.3956
	con_02m_m67_a3_002	con_02m_m67_a3_002.xlsx_RoiSetAuto-60.zip Distance px	18	2686.58	0.758933	276.406	9.71969	47.3956
	con_02m_m67_a3_002	con_02m_m67_a3_002.xlsx_RoiSetAuto-61.zip Distance px	53	4721.64	1.12322	276.406	17.0823	47.3956
	con_02m_m67_a3_002	con_02m_m67_a3_002.xlsx_RoiSetAuto-62.zip Distance px	8	2245.17	0.499626	276.406	8.12273	47.3956
	con_02m_m67_a3_002	con_02m_m67_a3_002.xlsx_RoiSetAuto-63.zip Distance px	3	2294.49	0.173852	276.406	8.30117	47.3956
	con_02m_m67_a3_002	con_02m_m67_a3_002.xlsx_RoiSetAuto-64.zip Distance px	5	2414.43	0.61265	276.406	8.73508	47.3956
	con_02m_m67_a3_002	con_02m_m67_a3_002.xlsx_RoiSetAuto-65.zip Distance px	5	2337.58	0.316319	276.406	8.45707	47.3956
	con_02m_m67_a3_002	con_02m_m67_a3_002.xlsx_RoiSetAuto-66.zip Distance px	3	2070.03	0.364244	276.406	7.4891	47.3956
	con_02m_m67_a3_002	con_02m_m67_a3_002.xlsx_RoiSetAuto-68.zip Distance px	5	2373.11	0.428248	276.406	8.5856	47.3956
	con_02m_m67_a3_002	con_02m_m67_a3_002.xlsx_RoiSetAuto-69.zip Distance px	4	2379.72	0.448179	276.406	8.60952	47.3956
	con_02m_m67_a3_002	con_02m_m67_a3_002.xlsx_RoiSetAuto-7.zip Distance px	74	5890.89	1.019	276.406	21.3124	47.3956
	con_02m_m67_a3_002	con_02m_m67_a3_002.xlsx_RoiSetAuto-70.zip Distance px	10	2403.54	0.804918	276.406	8.69568	47.3956
	con_02m_m67_a3_002	con_02m_m67_a3_002.xlsx_RoiSetAuto-71.zip Distance px	5	2387.46	1.02873	276.406	8.6375	47.3956
	con_02m_m67_a3_002	con_02m_m67_a3_002.xlsx_RoiSetAuto-72.zip Distance px	5	2457.57	0.364517	276.406	8.89118	47.3956
	con_02m_m67_a3_002	con_02m_m67_a3_002.xlsx_RoiSetAuto-73.zip Distance px	19	2718.19	0.599121	276.406	9.83404	47.3956
	con_02m_m67_a3_002	con_02m_m67_a3_002.xlsx_RoiSetAuto-74.zip Distance px	4	2618.49	0.333593	276.406	9.47336	47.3956
	con_02m_m67_a3_002	con_02m_m67_a3_002.xlsx_RoiSetAuto-75.zip Distance px	17	4061.4	0.714133	276.406	14.6936	47.3956
	con_02m_m67_a3_002	con_02m_m67_a3_002.xlsx_RoiSetAuto-76.zip Distance px	14	3678.36	1.04542	276.406	13.3078	47.3956
	con_02m_m67_a3_002	con_02m_m67_a3_002.xlsx_RoiSetAuto-77.zip Distance px	9	3076.1	0.584017	276.406	11.1289	47.3956
	con_02m_m67_a3_002	con_02m_m67_a3_002.xlsx_RoiSetAuto-78.zip Distance px	6	2083.7	0.549775	276.406	7.53854	47.3956
	con_02m_m67_a3_002	con_02m_m67_a3_002.xlsx_RoiSetAuto-79.zip Distance px	5	1804.85	0.332952	276.406	6.5297	47.3956
	con_02m_m67_a3_002	con_02m_m67_a3_002.xlsx_RoiSetAuto-8.zip Distance px	7	2499	0.549907	276.406	9.04107	47.3956
	con_02m_m67_a3_002	con_02m_m67_a3_002.xlsx_RoiSetAuto-80.zip Distance px	3	1826.09	0.216611	276.406	6.60654	47.3956
	con_02m_m67_a3_002	con_02m_m67_a3_002.xlsx_RoiSetAuto-9.zip Distance px	17	2245.53	0.706644	276.406	8.12403	47.3956
	con_03m_m67_a3_001	con_03m_m67_a3_001.xlsx_RoiSetAuto-1.zip Distance px	25	4450.75	0.961396	356.482	12.4852	117.973
	con_03m_m67_a3_001	con_03m_m67_a3_001.xlsx_RoiSetAuto-102.zip Distance px	3	2958.12	0.541246	356.482	8.29809	117.973
	con_03m_m67_a3_001	con_03m_m67_a3_001.xlsx_RoiSetAuto-104.zip Distance px	19	3242.34	1.73073	356.482	9.09539	117.973
	con_03m_m67_a3_001	con_03m_m67_a3_001.xlsx_RoiSetAuto-105.zip Distance px	17	3701.37	0.771221	356.482	10.383	117.973
	con_03m_m67_a3_001	con_03m_m67_a3_001.xlsx_RoiSetAuto-106.zip Distance px	10	4424.22	0.599818	356.482	12.4108	117.973
	con_03m_m67_a3_001	con_03m_m67_a3_001.xlsx_RoiSetAuto-107.zip Distance px	59	6808.2	1.29655	356.482	19.0983	117.973
	con_03m_m67_a3_001	con_03m_m67_a3_001.xlsx_RoiSetAuto-108.zip Distance px	3	3223.74	0.409875	356.482	9.04319	117.973
	con_03m_m67_a3_001	con_03m_m67_a3_001.xlsx_RoiSetAuto-11.zip Distance px	8	4568.17	0.286712	356.482	12.8146	117.973
	con_03m_m67_a3_001	con_03m_m67_a3_001.xlsx_RoiSetAuto-111.zip Distance px	34	5255.61	1.16821	356.482	14.743	117.973
	con_03m_m67_a3_001	con_03m_m67_a3_001.xlsx_RoiSetAuto-112.zip Distance px	4	3852.38	0.546548	356.482	10.8067	117.973
	con_03m_m67_a3_001	con_03m_m67_a3_001.xlsx_RoiSetAuto-113.zip Distance px	44	5721.19	1.25865	356.482	16.049	117.973
	con_03m_m67_a3_001	con_03m_m67_a3_001.xlsx_RoiSetAuto-116.zip Distance px	39	13737.4	0.784995	356.482	38.5361	117.973
	con_03m_m67_a3_001	con_03m_m67_a3_001.xlsx_RoiSetAuto-117.zip Distance px	3	3304.1	0.223247	356.482	9.26862	117.973
	con_03m_m67_a3_001	con_03m_m67_a3_001.xlsx_RoiSetAuto-118.zip Distance px	6	4092.78	0.578044	356.482	11.481	117.973
	con_03m_m67_a3_001	con_03m_m67_a3_001.xlsx_RoiSetAuto-119.zip Distance px	37	5275.05	1.09186	356.482	14.7975	117.973
	con_03m_m67_a3_001	con_03m_m67_a3_001.xlsx_RoiSetAuto-12.zip Distance px	33	3649.76	1.23486	356.482	10.2383	117.973
	con_03m_m67_a3_001	con_03m_m67_a3_001.xlsx_RoiSetAuto-122.zip Distance px	9	2865.84	0.405227	356.482	8.03923	117.973
	con_03m_m67_a3_001	con_03m_m67_a3_001.xlsx_RoiSetAuto-123.zip Distance px	3	2666.95	0.313966	356.482	7.4813	117.973
	con_03m_m67_a3_001	con_03m_m67_a3_001.xlsx_RoiSetAuto-124.zip Distance px	8	2647.67	0.522578	356.482	7.42722	117.973
	con_03m_m67_a3_001	con_03m_m67_a3_001.xlsx_RoiSetAuto-125.zip Distance px	21	13815.4	0.557579	356.482	38.7549	117.973
	con_03m_m67_a3_001	con_03m_m67_a3_001.xlsx_RoiSetAuto-127.zip Distance px	20	3101.15	1.02936	356.482	8.6993	117.973
	con_03m_m67_a3_001	con_03m_m67_a3_001.xlsx_RoiSetAuto-128.zip Distance px	3	3737.77	0.276645	356.482	10.4852	117.973
	con_03m_m67_a3_001	con_03m_m67_a3_001.xlsx_RoiSetAuto-129.zip Distance px	17	3128.07	1.47592	356.482	8.77482	117.973
	con_03m_m67_a3_001	con_03m_m67_a3_001.xlsx_RoiSetAuto-132.zip Distance px	4	2544.9	0.369258	356.482	7.13893	117.973
	con_03m_m67_a3_001	con_03m_m67_a3_001.xlsx_RoiSetAuto-133.zip Distance px	3	2734.23	0.503039	356.482	7.67004	117.973
	con_03m_m67_a3_001	con_03m_m67_a3_001.xlsx_RoiSetAuto-134.zip Distance px	10	3227.35	0.678631	356.482	9.05331	117.973
	con_03m_m67_a3_001	con_03m_m67_a3_001.xlsx_RoiSetAuto-135.zip Distance px	3	2950.98	0.657732	356.482	8.27805	117.973
	con_03m_m67_a3_001	con_03m_m67_a3_001.xlsx_RoiSetAuto-136.zip Distance px	7	3726.12	0.90068	356.482	10.4525	117.973
	con_03m_m67_a3_001	con_03m_m67_a3_001.xlsx_RoiSetAuto-137.zip Distance px	4	2504.23	0.300727	356.482	7.02483	117.973
	con_03m_m67_a3_001	con_03m_m67_a3_001.xlsx_RoiSetAuto-138.zip Distance px	6	3545.73	1.02193	356.482	9.94645	117.973
	con_03m_m67_a3_001	con_03m_m67_a3_001.xlsx_RoiSetAuto-139.zip Distance px	5	4005.65	0.958116	356.482	11.2366	117.973
	con_03m_m67_a3_001	con_03m_m67_a3_001.xlsx_RoiSetAuto-140.zip Distance px	5	3389.63	1.0877	356.482	9.50854	117.973
	con_03m_m67_a3_001	con_03m_m67_a3_001.xlsx_RoiSetAuto-16.zip Distance px	3	2504.48	0.169239	356.482	7.02552	117.973
	con_03m_m67_a3_001	con_03m_m67_a3_001.xlsx_RoiSetAuto-17.zip Distance px	16	3385.07	0.899972	356.482	9.49576	117.973
	con_03m_m67_a3_001	con_03m_m67_a3_001.xlsx_RoiSetAuto-20.zip Distance px	19	3592.41	1.05604	356.482	10.0774	117.973
	con_03m_m67_a3_001	con_03m_m67_a3_001.xlsx_RoiSetAuto-22.zip Distance px	22	4188.82	1.24671	356.482	11.7504	117.973
	con_03m_m67_a3_001	con_03m_m67_a3_001.xlsx_RoiSetAuto-23.zip Distance px	3	1875.57	0.638334	356.482	5.26133	117.973
	con_03m_m67_a3_001	con_03m_m67_a3_001.xlsx_RoiSetAuto-24.zip Distance px	3	3369.43	0.740346	356.482	9.45188	117.973
	con_03m_m67_a3_001	con_03m_m67_a3_001.xlsx_RoiSetAuto-3.zip Distance px	119	11721.9	1.22699	356.482	32.882	117.973
	con_03m_m67_a3_001	con_03m_m67_a3_001.xlsx_RoiSetAuto-30.zip Distance px	28	3185.64	0.569119	356.482	8.93633	117.973
	con_03m_m67_a3_001	con_03m_m67_a3_001.xlsx_RoiSetAuto-34.zip Distance px	9	3401.75	0.658889	356.482	9.54254	117.973
	con_03m_m67_a3_001	con_03m_m67_a3_001.xlsx_RoiSetAuto-35.zip Distance px	3	2631.64	0.744498	356.482	7.38226	117.973
	con_03m_m67_a3_001	con_03m_m67_a3_001.xlsx_RoiSetAuto-36.zip Distance px	4	2364.98	0.460662	356.482	6.63422	117.973
	con_03m_m67_a3_001	con_03m_m67_a3_001.xlsx_RoiSetAuto-39.zip Distance px	50	4034.62	1.0109	356.482	11.3179	117.973
	con_03m_m67_a3_001	con_03m_m67_a3_001.xlsx_RoiSetAuto-41.zip Distance px	3	2621.88	0.573039	356.482	7.35487	117.973
	con_03m_m67_a3_001	con_03m_m67_a3_001.xlsx_RoiSetAuto-42.zip Distance px	17	3346.75	0.893262	356.482	9.38825	117.973
	con_03m_m67_a3_001	con_03m_m67_a3_001.xlsx_RoiSetAuto-43.zip Distance px	24	4136.52	1.53227	356.482	11.6037	117.973
	con_03m_m67_a3_001	con_03m_m67_a3_001.xlsx_RoiSetAuto-44.zip Distance px	25	3714.59	1.15167	356.482	10.4201	117.973
	con_03m_m67_a3_001	con_03m_m67_a3_001.xlsx_RoiSetAuto-45.zip Distance px	19	3058.69	0.71208	356.482	8.58019	117.973
	con_03m_m67_a3_001	con_03m_m67_a3_001.xlsx_RoiSetAuto-47.zip Distance px	19	2972.01	0.800953	356.482	8.33705	117.973
	con_03m_m67_a3_001	con_03m_m67_a3_001.xlsx_RoiSetAuto-48.zip Distance px	5	2984.84	0.920834	356.482	8.37303	117.973
	con_03m_m67_a3_001	con_03m_m67_a3_001.xlsx_RoiSetAuto-49.zip Distance px	44	7377.74	1.05178	356.482	20.6959	117.973
	con_03m_m67_a3_001	con_03m_m67_a3_001.xlsx_RoiSetAuto-5.zip Distance px	30	3241.5	0.720975	356.482	9.09301	117.973
	con_03m_m67_a3_001	con_03m_m67_a3_001.xlsx_RoiSetAuto-50.zip Distance px	3	2695.84	0.720018	356.482	7.56234	117.973
	con_03m_m67_a3_001	con_03m_m67_a3_001.xlsx_RoiSetAuto-51.zip Distance px	3	2459.38	0.751832	356.482	6.89901	117.973
	con_03m_m67_a3_001	con_03m_m67_a3_001.xlsx_RoiSetAuto-52.zip Distance px	28	3121.77	1.25956	356.482	8.75715	117.973
	con_03m_m67_a3_001	con_03m_m67_a3_001.xlsx_RoiSetAuto-53.zip Distance px	14	3179.9	0.701372	356.482	8.92022	117.973
	con_03m_m67_a3_001	con_03m_m67_a3_001.xlsx_RoiSetAuto-54.zip Distance px	3	2317.07	0.470966	356.482	6.49981	117.973
	con_03m_m67_a3_001	con_03m_m67_a3_001.xlsx_RoiSetAuto-55.zip Distance px	4	3655.85	0.441017	356.482	10.2553	117.973
	con_03m_m67_a3_001	con_03m_m67_a3_001.xlsx_RoiSetAuto-56.zip Distance px	135	7485.01	1.20663	356.482	20.9968	117.973
	con_03m_m67_a3_001	con_03m_m67_a3_001.xlsx_RoiSetAuto-57.zip Distance px	24	4975.32	1.43007	356.482	13.9567	117.973
	con_03m_m67_a3_001	con_03m_m67_a3_001.xlsx_RoiSetAuto-58.zip Distance px	11	3127	0.889072	356.482	8.77181	117.973
	con_03m_m67_a3_001	con_03m_m67_a3_001.xlsx_RoiSetAuto-6.zip Distance px	17	3514.98	0.879185	356.482	9.86018	117.973
	con_03m_m67_a3_001	con_03m_m67_a3_001.xlsx_RoiSetAuto-60.zip Distance px	33	3695.39	1.0655	356.482	10.3663	117.973
	con_03m_m67_a3_001	con_03m_m67_a3_001.xlsx_RoiSetAuto-61.zip Distance px	3	2717.94	0.807326	356.482	7.62434	117.973
	con_03m_m67_a3_001	con_03m_m67_a3_001.xlsx_RoiSetAuto-62.zip Distance px	10	2945.97	0.806864	356.482	8.26401	117.973
	con_03m_m67_a3_001	con_03m_m67_a3_001.xlsx_RoiSetAuto-63.zip Distance px	16	6163.36	0.934465	356.482	17.2894	117.973
	con_03m_m67_a3_001	con_03m_m67_a3_001.xlsx_RoiSetAuto-65.zip Distance px	37	5717.85	1.04283	356.482	16.0396	117.973
	con_03m_m67_a3_001	con_03m_m67_a3_001.xlsx_RoiSetAuto-67.zip Distance px	16	3396.04	1.07632	356.482	9.52652	117.973
	con_03m_m67_a3_001	con_03m_m67_a3_001.xlsx_RoiSetAuto-68.zip Distance px	5	2571.8	0.866585	356.482	7.21439	117.973
	con_03m_m67_a3_001	con_03m_m67_a3_001.xlsx_RoiSetAuto-69.zip Distance px	3	2269.7	0.525634	356.482	6.36694	117.973
	con_03m_m67_a3_001	con_03m_m67_a3_001.xlsx_RoiSetAuto-7.zip Distance px	56	4492.99	1.1346	356.482	12.6037	117.973
	con_03m_m67_a3_001	con_03m_m67_a3_001.xlsx_RoiSetAuto-71.zip Distance px	3	2929.71	0.517107	356.482	8.21838	117.973
	con_03m_m67_a3_001	con_03m_m67_a3_001.xlsx_RoiSetAuto-72.zip Distance px	16	3340.64	1.24194	356.482	9.37111	117.973
	con_03m_m67_a3_001	con_03m_m67_a3_001.xlsx_RoiSetAuto-73.zip Distance px	3	2695.28	0.310952	356.482	7.56076	117.973
	con_03m_m67_a3_001	con_03m_m67_a3_001.xlsx_RoiSetAuto-75.zip Distance px	112	4745.48	1.5682	356.482	13.312	117.973
	con_03m_m67_a3_001	con_03m_m67_a3_001.xlsx_RoiSetAuto-76.zip Distance px	3	2751.39	0.597642	356.482	7.71818	117.973
	con_03m_m67_a3_001	con_03m_m67_a3_001.xlsx_RoiSetAuto-8.zip Distance px	15	6312.19	0.992167	356.482	17.7069	117.973
	con_03m_m67_a3_001	con_03m_m67_a3_001.xlsx_RoiSetAuto-81.zip Distance px	35	4474.97	1.14493	356.482	12.5531	117.973
	con_03m_m67_a3_001	con_03m_m67_a3_001.xlsx_RoiSetAuto-82.zip Distance px	4	3436.38	0.271577	356.482	9.63968	117.973
	con_03m_m67_a3_001	con_03m_m67_a3_001.xlsx_RoiSetAuto-85.zip Distance px	4	2388.02	0.681662	356.482	6.69885	117.973
	con_03m_m67_a3_001	con_03m_m67_a3_001.xlsx_RoiSetAuto-86.zip Distance px	20	4058.08	1.04379	356.482	11.3837	117.973
	con_03m_m67_a3_001	con_03m_m67_a3_001.xlsx_RoiSetAuto-88.zip Distance px	3	3341.79	0.726536	356.482	9.37435	117.973
	con_03m_m67_a3_001	con_03m_m67_a3_001.xlsx_RoiSetAuto-89.zip Distance px	14	4357.9	1.11786	356.482	12.2247	117.973
	con_03m_m67_a3_001	con_03m_m67_a3_001.xlsx_RoiSetAuto-90.zip Distance px	3	2489.75	0.574836	356.482	6.98422	117.973
	con_03m_m67_a3_001	con_03m_m67_a3_001.xlsx_RoiSetAuto-91.zip Distance px	88	5176.75	1.57634	356.482	14.5218	117.973
	con_03m_m67_a3_001	con_03m_m67_a3_001.xlsx_RoiSetAuto-92.zip Distance px	3	2953.02	0.275935	356.482	8.28376	117.973
	con_03m_m67_a3_001	con_03m_m67_a3_001.xlsx_RoiSetAuto-93.zip Distance px	15	3603.01	0.982077	356.482	10.1071	117.973
	con_03m_m67_a3_001	con_03m_m67_a3_001.xlsx_RoiSetAuto-94.zip Distance px	8	6648.87	0.829673	356.482	18.6513	117.973
	con_03m_m67_a3_001	con_03m_m67_a3_001.xlsx_RoiSetAuto-96.zip Distance px	8	3003.6	0.529194	356.482	8.42566	117.973
	con_03m_m67_a3_001	con_03m_m67_a3_001.xlsx_RoiSetAuto-97.zip Distance px	3	2666.34	0.604758	356.482	7.47958	117.973
	con_03m_m67_a3_001	con_03m_m67_a3_001.xlsx_RoiSetAuto-98.zip Distance px	55	14011.7	0.778745	356.482	39.3055	117.973
	con_03m_m67_a3_001	con_03m_m67_a3_001.xlsx_RoiSetAuto-99.zip Distance px	19	6598.06	1.11685	356.482	18.5088	117.973
	con_03m_m67_a3_002	con_03m_m67_a3_002.xlsx_RoiSetAuto-1.zip Distance px	8	3380.73	0.652639	345.094	9.79657	46.0267
	con_03m_m67_a3_002	con_03m_m67_a3_002.xlsx_RoiSetAuto-10.zip Distance px	27	3442.39	0.499837	345.094	9.97525	46.0267
	con_03m_m67_a3_002	con_03m_m67_a3_002.xlsx_RoiSetAuto-11.zip Distance px	10	2945.16	0.45269	345.094	8.53437	46.0267
	con_03m_m67_a3_002	con_03m_m67_a3_002.xlsx_RoiSetAuto-12.zip Distance px	6	2972.77	0.360545	345.094	8.61439	46.0267
	con_03m_m67_a3_002	con_03m_m67_a3_002.xlsx_RoiSetAuto-13.zip Distance px	101	3979.72	1.31349	345.094	11.5323	46.0267
	con_03m_m67_a3_002	con_03m_m67_a3_002.xlsx_RoiSetAuto-14.zip Distance px	4	2601.39	0.485081	345.094	7.53823	46.0267
	con_03m_m67_a3_002	con_03m_m67_a3_002.xlsx_RoiSetAuto-15.zip Distance px	10	2597.12	0.312138	345.094	7.52585	46.0267
	con_03m_m67_a3_002	con_03m_m67_a3_002.xlsx_RoiSetAuto-16.zip Distance px	37	3554.23	0.866593	345.094	10.2993	46.0267
	con_03m_m67_a3_002	con_03m_m67_a3_002.xlsx_RoiSetAuto-17.zip Distance px	3	2538.38	0.274122	345.094	7.35562	46.0267
	con_03m_m67_a3_002	con_03m_m67_a3_002.xlsx_RoiSetAuto-18.zip Distance px	170	5266.89	1.48812	345.094	15.2622	46.0267
	con_03m_m67_a3_002	con_03m_m67_a3_002.xlsx_RoiSetAuto-19.zip Distance px	8	2671.18	0.580733	345.094	7.74045	46.0267
	con_03m_m67_a3_002	con_03m_m67_a3_002.xlsx_RoiSetAuto-2.zip Distance px	11	3295.92	0.691514	345.094	9.55081	46.0267
	con_03m_m67_a3_002	con_03m_m67_a3_002.xlsx_RoiSetAuto-20.zip Distance px	56	4600.76	1.17438	345.094	13.3319	46.0267
	con_03m_m67_a3_002	con_03m_m67_a3_002.xlsx_RoiSetAuto-21.zip Distance px	16	3615.94	0.484322	345.094	10.4781	46.0267
	con_03m_m67_a3_002	con_03m_m67_a3_002.xlsx_RoiSetAuto-22.zip Distance px	8	3008.92	0.620603	345.094	8.71913	46.0267
	con_03m_m67_a3_002	con_03m_m67_a3_002.xlsx_RoiSetAuto-23.zip Distance px	5	2591.61	0.307601	345.094	7.50987	46.0267
	con_03m_m67_a3_002	con_03m_m67_a3_002.xlsx_RoiSetAuto-24.zip Distance px	3	2845.84	0.183277	345.094	8.24659	46.0267
	con_03m_m67_a3_002	con_03m_m67_a3_002.xlsx_RoiSetAuto-25.zip Distance px	17	3119.74	0.537571	345.094	9.04028	46.0267
	con_03m_m67_a3_002	con_03m_m67_a3_002.xlsx_RoiSetAuto-26.zip Distance px	64	3642.52	1.48402	345.094	10.5552	46.0267
	con_03m_m67_a3_002	con_03m_m67_a3_002.xlsx_RoiSetAuto-27.zip Distance px	53	5363.27	1.00263	345.094	15.5415	46.0267
	con_03m_m67_a3_002	con_03m_m67_a3_002.xlsx_RoiSetAuto-28.zip Distance px	5	2559.68	0.176113	345.094	7.41734	46.0267
	con_03m_m67_a3_002	con_03m_m67_a3_002.xlsx_RoiSetAuto-29.zip Distance px	129	7203.45	1.55931	345.094	20.8739	46.0267
	con_03m_m67_a3_002	con_03m_m67_a3_002.xlsx_RoiSetAuto-3.zip Distance px	11	2774.41	0.567339	345.094	8.03958	46.0267
	con_03m_m67_a3_002	con_03m_m67_a3_002.xlsx_RoiSetAuto-30.zip Distance px	6	2614.36	0.249941	345.094	7.5758	46.0267
	con_03m_m67_a3_002	con_03m_m67_a3_002.xlsx_RoiSetAuto-31.zip Distance px	3	3155.28	0.207704	345.094	9.14325	46.0267
	con_03m_m67_a3_002	con_03m_m67_a3_002.xlsx_RoiSetAuto-32.zip Distance px	68	4092.01	1.16493	345.094	11.8577	46.0267
	con_03m_m67_a3_002	con_03m_m67_a3_002.xlsx_RoiSetAuto-33.zip Distance px	7	3298.89	0.379537	345.094	9.5594	46.0267
	con_03m_m67_a3_002	con_03m_m67_a3_002.xlsx_RoiSetAuto-34.zip Distance px	101	5560.23	1.56809	345.094	16.1122	46.0267
	con_03m_m67_a3_002	con_03m_m67_a3_002.xlsx_RoiSetAuto-35.zip Distance px	71	3750.2	1.04277	345.094	10.8672	46.0267
	con_03m_m67_a3_002	con_03m_m67_a3_002.xlsx_RoiSetAuto-36.zip Distance px	3	2599.82	0.193637	345.094	7.53367	46.0267
	con_03m_m67_a3_002	con_03m_m67_a3_002.xlsx_RoiSetAuto-37.zip Distance px	73	6080.98	1.66089	345.094	17.6213	46.0267
	con_03m_m67_a3_002	con_03m_m67_a3_002.xlsx_RoiSetAuto-38.zip Distance px	5	4607.16	0.440672	345.094	13.3505	46.0267
	con_03m_m67_a3_002	con_03m_m67_a3_002.xlsx_RoiSetAuto-39.zip Distance px	9	3293.94	0.508278	345.094	9.54506	46.0267
	con_03m_m67_a3_002	con_03m_m67_a3_002.xlsx_RoiSetAuto-4.zip Distance px	209	10796.9	0.694466	345.094	31.2869	46.0267
	con_03m_m67_a3_002	con_03m_m67_a3_002.xlsx_RoiSetAuto-40.zip Distance px	5	3123.5	0.519215	345.094	9.05116	46.0267
	con_03m_m67_a3_002	con_03m_m67_a3_002.xlsx_RoiSetAuto-41.zip Distance px	9	3163.11	0.418608	345.094	9.16596	46.0267
	con_03m_m67_a3_002	con_03m_m67_a3_002.xlsx_RoiSetAuto-42.zip Distance px	8	2892.76	0.38493	345.094	8.38255	46.0267
	con_03m_m67_a3_002	con_03m_m67_a3_002.xlsx_RoiSetAuto-43.zip Distance px	3	2821.81	0.258988	345.094	8.17695	46.0267
	con_03m_m67_a3_002	con_03m_m67_a3_002.xlsx_RoiSetAuto-44.zip Distance px	6	2753.91	0.649135	345.094	7.98019	46.0267
	con_03m_m67_a3_002	con_03m_m67_a3_002.xlsx_RoiSetAuto-45.zip Distance px	5	2854.27	0.314101	345.094	8.27102	46.0267
	con_03m_m67_a3_002	con_03m_m67_a3_002.xlsx_RoiSetAuto-46.zip Distance px	28	5755.27	1.16449	345.094	16.6774	46.0267
	con_03m_m67_a3_002	con_03m_m67_a3_002.xlsx_RoiSetAuto-47.zip Distance px	4	2849.9	0.452514	345.094	8.25833	46.0267
	con_03m_m67_a3_002	con_03m_m67_a3_002.xlsx_RoiSetAuto-48.zip Distance px	5	3171.02	0.641027	345.094	9.18886	46.0267
	con_03m_m67_a3_002	con_03m_m67_a3_002.xlsx_RoiSetAuto-49.zip Distance px	6	2659.22	0.420888	345.094	7.70578	46.0267
	con_03m_m67_a3_002	con_03m_m67_a3_002.xlsx_RoiSetAuto-5.zip Distance px	16	3379.64	0.660261	345.094	9.79342	46.0267
	con_03m_m67_a3_002	con_03m_m67_a3_002.xlsx_RoiSetAuto-50.zip Distance px	8	5021.96	0.847406	345.094	14.5525	46.0267
	con_03m_m67_a3_002	con_03m_m67_a3_002.xlsx_RoiSetAuto-51.zip Distance px	7	3019.8	0.523628	345.094	8.75067	46.0267
	con_03m_m67_a3_002	con_03m_m67_a3_002.xlsx_RoiSetAuto-52.zip Distance px	3	3961.1	0.372236	345.094	11.4783	46.0267
	con_03m_m67_a3_002	con_03m_m67_a3_002.xlsx_RoiSetAuto-53.zip Distance px	3	3272.41	0.287666	345.094	9.48268	46.0267
	con_03m_m67_a3_002	con_03m_m67_a3_002.xlsx_RoiSetAuto-6.zip Distance px	3	3631.88	0.619161	345.094	10.5243	46.0267
	con_03m_m67_a3_002	con_03m_m67_a3_002.xlsx_RoiSetAuto-7.zip Distance px	8	3045.75	0.343353	345.094	8.82586	46.0267
	con_03m_m67_a3_002	con_03m_m67_a3_002.xlsx_RoiSetAuto-8.zip Distance px	31	3569.12	0.83472	345.094	10.3425	46.0267
	con_03m_m67_a3_002	con_03m_m67_a3_002.xlsx_RoiSetAuto-9.zip Distance px	6	2687.24	0.186519	345.094	7.78699	46.0267
	con_03m_m67_a3_003	con_03m_m67_a3_003.xlsx_RoiSetAuto-1.zip Distance px	3	1996.61	0.273414	309.828	6.44424	50.7911
	con_03m_m67_a3_003	con_03m_m67_a3_003.xlsx_RoiSetAuto-10.zip Distance px	3	2680.8	0.38705	309.828	8.65254	50.7911
	con_03m_m67_a3_003	con_03m_m67_a3_003.xlsx_RoiSetAuto-11.zip Distance px	13	4924.6	0.589166	309.828	15.8946	50.7911
	con_03m_m67_a3_003	con_03m_m67_a3_003.xlsx_RoiSetAuto-12.zip Distance px	4	2537.34	0.630144	309.828	8.1895	50.7911
	con_03m_m67_a3_003	con_03m_m67_a3_003.xlsx_RoiSetAuto-15.zip Distance px	4	3058.51	0.630161	309.828	9.87166	50.7911
	con_03m_m67_a3_003	con_03m_m67_a3_003.xlsx_RoiSetAuto-16.zip Distance px	5	2223.12	0.162529	309.828	7.17534	50.7911
	con_03m_m67_a3_003	con_03m_m67_a3_003.xlsx_RoiSetAuto-17.zip Distance px	6	3083.55	0.386792	309.828	9.95246	50.7911
	con_03m_m67_a3_003	con_03m_m67_a3_003.xlsx_RoiSetAuto-18.zip Distance px	8	2901.86	0.56716	309.828	9.36603	50.7911
	con_03m_m67_a3_003	con_03m_m67_a3_003.xlsx_RoiSetAuto-19.zip Distance px	29	4088.06	1.08109	309.828	13.1946	50.7911
	con_03m_m67_a3_003	con_03m_m67_a3_003.xlsx_RoiSetAuto-2.zip Distance px	13	2965.32	0.545061	309.828	9.57087	50.7911
	con_03m_m67_a3_003	con_03m_m67_a3_003.xlsx_RoiSetAuto-20.zip Distance px	42	3273.21	0.793642	309.828	10.5646	50.7911
	con_03m_m67_a3_003	con_03m_m67_a3_003.xlsx_RoiSetAuto-21.zip Distance px	39	3663.12	0.726064	309.828	11.8231	50.7911
	con_03m_m67_a3_003	con_03m_m67_a3_003.xlsx_RoiSetAuto-22.zip Distance px	4	2597.36	0.602507	309.828	8.38323	50.7911
	con_03m_m67_a3_003	con_03m_m67_a3_003.xlsx_RoiSetAuto-24.zip Distance px	48	3845.84	1.23996	309.828	12.4128	50.7911
	con_03m_m67_a3_003	con_03m_m67_a3_003.xlsx_RoiSetAuto-25.zip Distance px	4	2536.81	0.586107	309.828	8.18782	50.7911
	con_03m_m67_a3_003	con_03m_m67_a3_003.xlsx_RoiSetAuto-26.zip Distance px	11	2704.44	0.551932	309.828	8.72884	50.7911
	con_03m_m67_a3_003	con_03m_m67_a3_003.xlsx_RoiSetAuto-27.zip Distance px	9	3041.18	0.458625	309.828	9.8157	50.7911
	con_03m_m67_a3_003	con_03m_m67_a3_003.xlsx_RoiSetAuto-28.zip Distance px	30	2981.49	0.391573	309.828	9.62305	50.7911
	con_03m_m67_a3_003	con_03m_m67_a3_003.xlsx_RoiSetAuto-29.zip Distance px	5	2460.13	0.120114	309.828	7.9403	50.7911
	con_03m_m67_a3_003	con_03m_m67_a3_003.xlsx_RoiSetAuto-31.zip Distance px	4	2430.98	0.149763	309.828	7.84624	50.7911
	con_03m_m67_a3_003	con_03m_m67_a3_003.xlsx_RoiSetAuto-32.zip Distance px	6	2421.33	0.392631	309.828	7.81509	50.7911
	con_03m_m67_a3_003	con_03m_m67_a3_003.xlsx_RoiSetAuto-33.zip Distance px	27	3047.35	0.682085	309.828	9.83564	50.7911
	con_03m_m67_a3_003	con_03m_m67_a3_003.xlsx_RoiSetAuto-35.zip Distance px	4	2109.37	0.413025	309.828	6.80821	50.7911
	con_03m_m67_a3_003	con_03m_m67_a3_003.xlsx_RoiSetAuto-36.zip Distance px	5	3944.01	0.601351	309.828	12.7297	50.7911
	con_03m_m67_a3_003	con_03m_m67_a3_003.xlsx_RoiSetAuto-37.zip Distance px	3	2358.52	0.344199	309.828	7.61235	50.7911
	con_03m_m67_a3_003	con_03m_m67_a3_003.xlsx_RoiSetAuto-38.zip Distance px	25	4813.59	0.778721	309.828	15.5363	50.7911
	con_03m_m67_a3_003	con_03m_m67_a3_003.xlsx_RoiSetAuto-4.zip Distance px	50	4409.98	0.769229	309.828	14.2336	50.7911
	con_03m_m67_a3_003	con_03m_m67_a3_003.xlsx_RoiSetAuto-40.zip Distance px	12	2841.45	0.49987	309.828	9.17105	50.7911
	con_03m_m67_a3_003	con_03m_m67_a3_003.xlsx_RoiSetAuto-41.zip Distance px	3	2546.08	0.421866	309.828	8.21774	50.7911
	con_03m_m67_a3_003	con_03m_m67_a3_003.xlsx_RoiSetAuto-43.zip Distance px	14	2817.53	0.644608	309.828	9.09385	50.7911
	con_03m_m67_a3_003	con_03m_m67_a3_003.xlsx_RoiSetAuto-46.zip Distance px	11	2830.68	0.532064	309.828	9.13631	50.7911
	con_03m_m67_a3_003	con_03m_m67_a3_003.xlsx_RoiSetAuto-47.zip Distance px	5	2269.32	0.643338	309.828	7.32444	50.7911
	con_03m_m67_a3_003	con_03m_m67_a3_003.xlsx_RoiSetAuto-48.zip Distance px	8	2759.19	0.569864	309.828	8.90557	50.7911
	con_03m_m67_a3_003	con_03m_m67_a3_003.xlsx_RoiSetAuto-49.zip Distance px	3	2346.65	0.495711	309.828	7.57404	50.7911
	con_03m_m67_a3_003	con_03m_m67_a3_003.xlsx_RoiSetAuto-5.zip Distance px	32	5105.74	1.02476	309.828	16.4793	50.7911
	con_03m_m67_a3_003	con_03m_m67_a3_003.xlsx_RoiSetAuto-50.zip Distance px	13	2707.93	0.586969	309.828	8.74012	50.7911
	con_03m_m67_a3_003	con_03m_m67_a3_003.xlsx_RoiSetAuto-52.zip Distance px	3	2127.08	0.41534	309.828	6.86537	50.7911
	con_03m_m67_a3_003	con_03m_m67_a3_003.xlsx_RoiSetAuto-53.zip Distance px	12	3303.52	0.72442	309.828	10.6624	50.7911
	con_03m_m67_a3_003	con_03m_m67_a3_003.xlsx_RoiSetAuto-6.zip Distance px	12	2358.08	0.907537	309.828	7.61093	50.7911
	con_03m_m67_a3_003	con_03m_m67_a3_003.xlsx_RoiSetAuto-7.zip Distance px	4	2468.66	0.266622	309.828	7.96784	50.7911
	con_03m_m67_a3_003	con_03m_m67_a3_003.xlsx_RoiSetAuto-8.zip Distance px	59	4849.6	1.07428	309.828	15.6526	50.7911
	con_04m_m67_a3_002	con_04m_m67_a3_002.xlsx_RoiSetAuto-1.zip Distance px	43	5297.77	0.875361	365.882	14.4795	83.0933
	con_04m_m67_a3_002	con_04m_m67_a3_002.xlsx_RoiSetAuto-10.zip Distance px	17	2929.89	0.835597	365.882	8.00775	83.0933
	con_04m_m67_a3_002	con_04m_m67_a3_002.xlsx_RoiSetAuto-100.zip Distance px	3	2839.51	0.323003	365.882	7.76071	83.0933
	con_04m_m67_a3_002	con_04m_m67_a3_002.xlsx_RoiSetAuto-101.zip Distance px	3	2774.71	0.422872	365.882	7.58363	83.0933
	con_04m_m67_a3_002	con_04m_m67_a3_002.xlsx_RoiSetAuto-102.zip Distance px	20	2966.03	1.04949	365.882	8.10652	83.0933
	con_04m_m67_a3_002	con_04m_m67_a3_002.xlsx_RoiSetAuto-103.zip Distance px	16	4711.22	0.638663	365.882	12.8763	83.0933
	con_04m_m67_a3_002	con_04m_m67_a3_002.xlsx_RoiSetAuto-105.zip Distance px	18	3321.85	0.837924	365.882	9.07903	83.0933
	con_04m_m67_a3_002	con_04m_m67_a3_002.xlsx_RoiSetAuto-106.zip Distance px	15	2771.39	0.869453	365.882	7.57454	83.0933
	con_04m_m67_a3_002	con_04m_m67_a3_002.xlsx_RoiSetAuto-107.zip Distance px	17	3117.24	0.631585	365.882	8.51979	83.0933
	con_04m_m67_a3_002	con_04m_m67_a3_002.xlsx_RoiSetAuto-108.zip Distance px	4	2842.63	0.454558	365.882	7.76926	83.0933
	con_04m_m67_a3_002	con_04m_m67_a3_002.xlsx_RoiSetAuto-109.zip Distance px	4	1805.45	0.389186	365.882	4.93453	83.0933
	con_04m_m67_a3_002	con_04m_m67_a3_002.xlsx_RoiSetAuto-11.zip Distance px	16	3347.3	0.435816	365.882	9.14858	83.0933
	con_04m_m67_a3_002	con_04m_m67_a3_002.xlsx_RoiSetAuto-110.zip Distance px	3	2430.88	0.125721	365.882	6.64389	83.0933
	con_04m_m67_a3_002	con_04m_m67_a3_002.xlsx_RoiSetAuto-111.zip Distance px	13	3076.41	0.669537	365.882	8.40819	83.0933
	con_04m_m67_a3_002	con_04m_m67_a3_002.xlsx_RoiSetAuto-112.zip Distance px	12	4967.4	0.621689	365.882	13.5765	83.0933
	con_04m_m67_a3_002	con_04m_m67_a3_002.xlsx_RoiSetAuto-113.zip Distance px	13	3053.13	0.685007	365.882	8.34458	83.0933
	con_04m_m67_a3_002	con_04m_m67_a3_002.xlsx_RoiSetAuto-114.zip Distance px	3	2693.67	0.229528	365.882	7.36213	83.0933
	con_04m_m67_a3_002	con_04m_m67_a3_002.xlsx_RoiSetAuto-115.zip Distance px	6	1760.27	0.407567	365.882	4.81103	83.0933
	con_04m_m67_a3_002	con_04m_m67_a3_002.xlsx_RoiSetAuto-116.zip Distance px	3	2717.2	0.201299	365.882	7.42644	83.0933
	con_04m_m67_a3_002	con_04m_m67_a3_002.xlsx_RoiSetAuto-12.zip Distance px	18	3120.36	0.562751	365.882	8.52831	83.0933
	con_04m_m67_a3_002	con_04m_m67_a3_002.xlsx_RoiSetAuto-13.zip Distance px	6	2774.02	0.480415	365.882	7.58173	83.0933
	con_04m_m67_a3_002	con_04m_m67_a3_002.xlsx_RoiSetAuto-14.zip Distance px	4	2856.07	0.403817	365.882	7.806	83.0933
	con_04m_m67_a3_002	con_04m_m67_a3_002.xlsx_RoiSetAuto-15.zip Distance px	4	3055.69	0.34023	365.882	8.35158	83.0933
	con_04m_m67_a3_002	con_04m_m67_a3_002.xlsx_RoiSetAuto-16.zip Distance px	21	3355.01	0.81039	365.882	9.16964	83.0933
	con_04m_m67_a3_002	con_04m_m67_a3_002.xlsx_RoiSetAuto-17.zip Distance px	10	3113.57	0.612268	365.882	8.50977	83.0933
	con_04m_m67_a3_002	con_04m_m67_a3_002.xlsx_RoiSetAuto-19.zip Distance px	26	3518.08	0.55393	365.882	9.61534	83.0933
	con_04m_m67_a3_002	con_04m_m67_a3_002.xlsx_RoiSetAuto-2.zip Distance px	156	5076.99	0.978194	365.882	13.876	83.0933
	con_04m_m67_a3_002	con_04m_m67_a3_002.xlsx_RoiSetAuto-20.zip Distance px	24	3999.44	0.648549	365.882	10.931	83.0933
	con_04m_m67_a3_002	con_04m_m67_a3_002.xlsx_RoiSetAuto-21.zip Distance px	11	4350.02	0.651739	365.882	11.8891	83.0933
	con_04m_m67_a3_002	con_04m_m67_a3_002.xlsx_RoiSetAuto-22.zip Distance px	3	3413.15	0.612607	365.882	9.32855	83.0933
	con_04m_m67_a3_002	con_04m_m67_a3_002.xlsx_RoiSetAuto-23.zip Distance px	18	4101.81	0.747345	365.882	11.2108	83.0933
	con_04m_m67_a3_002	con_04m_m67_a3_002.xlsx_RoiSetAuto-24.zip Distance px	4	2983.09	0.421833	365.882	8.15314	83.0933
	con_04m_m67_a3_002	con_04m_m67_a3_002.xlsx_RoiSetAuto-25.zip Distance px	93	4585.55	1.07586	365.882	12.5329	83.0933
	con_04m_m67_a3_002	con_04m_m67_a3_002.xlsx_RoiSetAuto-26.zip Distance px	13	3824.18	0.611962	365.882	10.452	83.0933
	con_04m_m67_a3_002	con_04m_m67_a3_002.xlsx_RoiSetAuto-27.zip Distance px	26	3364.27	0.523917	365.882	9.19497	83.0933
	con_04m_m67_a3_002	con_04m_m67_a3_002.xlsx_RoiSetAuto-28.zip Distance px	149	4403.18	1.15196	365.882	12.0344	83.0933
	con_04m_m67_a3_002	con_04m_m67_a3_002.xlsx_RoiSetAuto-29.zip Distance px	4	3135.35	0.232096	365.882	8.56929	83.0933
	con_04m_m67_a3_002	con_04m_m67_a3_002.xlsx_RoiSetAuto-30.zip Distance px	3	2709.24	0.078547	365.882	7.40467	83.0933
	con_04m_m67_a3_002	con_04m_m67_a3_002.xlsx_RoiSetAuto-31.zip Distance px	15	3092.13	0.493744	365.882	8.45117	83.0933
	con_04m_m67_a3_002	con_04m_m67_a3_002.xlsx_RoiSetAuto-32.zip Distance px	3	2446.26	0.144587	365.882	6.68593	83.0933
	con_04m_m67_a3_002	con_04m_m67_a3_002.xlsx_RoiSetAuto-33.zip Distance px	4	3752.18	0.438637	365.882	10.2552	83.0933
	con_04m_m67_a3_002	con_04m_m67_a3_002.xlsx_RoiSetAuto-34.zip Distance px	4	2838.34	0.265463	365.882	7.75752	83.0933
	con_04m_m67_a3_002	con_04m_m67_a3_002.xlsx_RoiSetAuto-35.zip Distance px	3	2414	0.093098	365.882	6.59777	83.0933
	con_04m_m67_a3_002	con_04m_m67_a3_002.xlsx_RoiSetAuto-36.zip Distance px	3	3356.15	0.400281	365.882	9.17276	83.0933
	con_04m_m67_a3_002	con_04m_m67_a3_002.xlsx_RoiSetAuto-37.zip Distance px	100	3368.08	0.959988	365.882	9.20536	83.0933
	con_04m_m67_a3_002	con_04m_m67_a3_002.xlsx_RoiSetAuto-38.zip Distance px	47	4140.04	0.95329	365.882	11.3152	83.0933
	con_04m_m67_a3_002	con_04m_m67_a3_002.xlsx_RoiSetAuto-39.zip Distance px	9	2733.26	0.364608	365.882	7.47032	83.0933
	con_04m_m67_a3_002	con_04m_m67_a3_002.xlsx_RoiSetAuto-4.zip Distance px	12	3789.34	0.407008	365.882	10.3567	83.0933
	con_04m_m67_a3_002	con_04m_m67_a3_002.xlsx_RoiSetAuto-40.zip Distance px	15	4532.73	0.324894	365.882	12.3885	83.0933
	con_04m_m67_a3_002	con_04m_m67_a3_002.xlsx_RoiSetAuto-41.zip Distance px	65	4556.67	0.796858	365.882	12.4539	83.0933
	con_04m_m67_a3_002	con_04m_m67_a3_002.xlsx_RoiSetAuto-42.zip Distance px	3	2508.66	0.276635	365.882	6.85646	83.0933
	con_04m_m67_a3_002	con_04m_m67_a3_002.xlsx_RoiSetAuto-43.zip Distance px	67	5787.15	0.864743	365.882	15.817	83.0933
	con_04m_m67_a3_002	con_04m_m67_a3_002.xlsx_RoiSetAuto-44.zip Distance px	5	2678.57	0.286034	365.882	7.32085	83.0933
	con_04m_m67_a3_002	con_04m_m67_a3_002.xlsx_RoiSetAuto-45.zip Distance px	27	3782.98	0.991991	365.882	10.3393	83.0933
	con_04m_m67_a3_002	con_04m_m67_a3_002.xlsx_RoiSetAuto-46.zip Distance px	7	3334.38	0.329307	365.882	9.11327	83.0933
	con_04m_m67_a3_002	con_04m_m67_a3_002.xlsx_RoiSetAuto-47.zip Distance px	82	4838.02	1.20533	365.882	13.2229	83.0933
	con_04m_m67_a3_002	con_04m_m67_a3_002.xlsx_RoiSetAuto-48.zip Distance px	5	2694.25	0.247946	365.882	7.36372	83.0933
	con_04m_m67_a3_002	con_04m_m67_a3_002.xlsx_RoiSetAuto-49.zip Distance px	48	3780.26	0.78393	365.882	10.3319	83.0933
	con_04m_m67_a3_002	con_04m_m67_a3_002.xlsx_RoiSetAuto-5.zip Distance px	17	3715.47	0.528861	365.882	10.1548	83.0933
	con_04m_m67_a3_002	con_04m_m67_a3_002.xlsx_RoiSetAuto-50.zip Distance px	4	2705.86	0.182802	365.882	7.39544	83.0933
	con_04m_m67_a3_002	con_04m_m67_a3_002.xlsx_RoiSetAuto-51.zip Distance px	20	3767.5	0.751108	365.882	10.297	83.0933
	con_04m_m67_a3_002	con_04m_m67_a3_002.xlsx_RoiSetAuto-52.zip Distance px	18	2101.05	0.482774	365.882	5.74243	83.0933
	con_04m_m67_a3_002	con_04m_m67_a3_002.xlsx_RoiSetAuto-53.zip Distance px	4	2639.83	0.313134	365.882	7.21497	83.0933
	con_04m_m67_a3_002	con_04m_m67_a3_002.xlsx_RoiSetAuto-54.zip Distance px	31	3102.84	0.730047	365.882	8.48043	83.0933
	con_04m_m67_a3_002	con_04m_m67_a3_002.xlsx_RoiSetAuto-55.zip Distance px	6	3134.68	0.262241	365.882	8.56747	83.0933
	con_04m_m67_a3_002	con_04m_m67_a3_002.xlsx_RoiSetAuto-56.zip Distance px	3	2528.89	0.129924	365.882	6.91176	83.0933
	con_04m_m67_a3_002	con_04m_m67_a3_002.xlsx_RoiSetAuto-57.zip Distance px	3	2634.97	0.316982	365.882	7.20171	83.0933
	con_04m_m67_a3_002	con_04m_m67_a3_002.xlsx_RoiSetAuto-58.zip Distance px	7	2914.16	0.199488	365.882	7.96476	83.0933
	con_04m_m67_a3_002	con_04m_m67_a3_002.xlsx_RoiSetAuto-59.zip Distance px	3	2769.98	0.184522	365.882	7.57069	83.0933
	con_04m_m67_a3_002	con_04m_m67_a3_002.xlsx_RoiSetAuto-6.zip Distance px	40	4532.74	0.694937	365.882	12.3885	83.0933
	con_04m_m67_a3_002	con_04m_m67_a3_002.xlsx_RoiSetAuto-60.zip Distance px	14	2084.19	0.532644	365.882	5.69635	83.0933
	con_04m_m67_a3_002	con_04m_m67_a3_002.xlsx_RoiSetAuto-61.zip Distance px	5	2548.74	0.206679	365.882	6.96601	83.0933
	con_04m_m67_a3_002	con_04m_m67_a3_002.xlsx_RoiSetAuto-62.zip Distance px	4	3209.08	0.375113	365.882	8.77082	83.0933
	con_04m_m67_a3_002	con_04m_m67_a3_002.xlsx_RoiSetAuto-65.zip Distance px	3	2618.52	0.391757	365.882	7.15673	83.0933
	con_04m_m67_a3_002	con_04m_m67_a3_002.xlsx_RoiSetAuto-66.zip Distance px	4	2657.72	0.442173	365.882	7.26388	83.0933
	con_04m_m67_a3_002	con_04m_m67_a3_002.xlsx_RoiSetAuto-67.zip Distance px	6	2580.25	0.300652	365.882	7.05215	83.0933
	con_04m_m67_a3_002	con_04m_m67_a3_002.xlsx_RoiSetAuto-68.zip Distance px	19	3398.89	0.878959	365.882	9.28958	83.0933
	con_04m_m67_a3_002	con_04m_m67_a3_002.xlsx_RoiSetAuto-69.zip Distance px	58	2149.04	0.72099	365.882	5.87358	83.0933
	con_04m_m67_a3_002	con_04m_m67_a3_002.xlsx_RoiSetAuto-7.zip Distance px	37	3597.29	0.908207	365.882	9.83183	83.0933
	con_04m_m67_a3_002	con_04m_m67_a3_002.xlsx_RoiSetAuto-70.zip Distance px	85	5011.74	1.01543	365.882	13.6977	83.0933
	con_04m_m67_a3_002	con_04m_m67_a3_002.xlsx_RoiSetAuto-71.zip Distance px	58	3939.03	0.864849	365.882	10.7659	83.0933
	con_04m_m67_a3_002	con_04m_m67_a3_002.xlsx_RoiSetAuto-72.zip Distance px	18	3010.65	0.718031	365.882	8.22849	83.0933
	con_04m_m67_a3_002	con_04m_m67_a3_002.xlsx_RoiSetAuto-73.zip Distance px	3	2541.5	0.216371	365.882	6.94622	83.0933
	con_04m_m67_a3_002	con_04m_m67_a3_002.xlsx_RoiSetAuto-74.zip Distance px	39	3163.57	0.702479	365.882	8.64641	83.0933
	con_04m_m67_a3_002	con_04m_m67_a3_002.xlsx_RoiSetAuto-75.zip Distance px	4	2788.76	0.072485	365.882	7.62203	83.0933
	con_04m_m67_a3_002	con_04m_m67_a3_002.xlsx_RoiSetAuto-76.zip Distance px	3	3070.34	0.478712	365.882	8.3916	83.0933
	con_04m_m67_a3_002	con_04m_m67_a3_002.xlsx_RoiSetAuto-77.zip Distance px	49	5801.47	0.592345	365.882	15.8561	83.0933
	con_04m_m67_a3_002	con_04m_m67_a3_002.xlsx_RoiSetAuto-78.zip Distance px	3	2532.91	0.231844	365.882	6.92274	83.0933
	con_04m_m67_a3_002	con_04m_m67_a3_002.xlsx_RoiSetAuto-79.zip Distance px	29	2982.31	0.895833	365.882	8.15103	83.0933
	con_04m_m67_a3_002	con_04m_m67_a3_002.xlsx_RoiSetAuto-8.zip Distance px	27	4557.51	0.957848	365.882	12.4562	83.0933
	con_04m_m67_a3_002	con_04m_m67_a3_002.xlsx_RoiSetAuto-80.zip Distance px	6	2391.93	0.306253	365.882	6.53742	83.0933
	con_04m_m67_a3_002	con_04m_m67_a3_002.xlsx_RoiSetAuto-81.zip Distance px	83	4496.1	0.917013	365.882	12.2884	83.0933
	con_04m_m67_a3_002	con_04m_m67_a3_002.xlsx_RoiSetAuto-82.zip Distance px	22	3254.37	0.589018	365.882	8.8946	83.0933
	con_04m_m67_a3_002	con_04m_m67_a3_002.xlsx_RoiSetAuto-83.zip Distance px	18	3189.53	0.635051	365.882	8.71738	83.0933
	con_04m_m67_a3_002	con_04m_m67_a3_002.xlsx_RoiSetAuto-85.zip Distance px	29	3551.84	0.67092	365.882	9.70761	83.0933
	con_04m_m67_a3_002	con_04m_m67_a3_002.xlsx_RoiSetAuto-86.zip Distance px	3	2637.85	0.531491	365.882	7.20958	83.0933
	con_04m_m67_a3_002	con_04m_m67_a3_002.xlsx_RoiSetAuto-87.zip Distance px	64	6781.24	0.787815	365.882	18.534	83.0933
	con_04m_m67_a3_002	con_04m_m67_a3_002.xlsx_RoiSetAuto-88.zip Distance px	3	2641.51	0.231929	365.882	7.21957	83.0933
	con_04m_m67_a3_002	con_04m_m67_a3_002.xlsx_RoiSetAuto-89.zip Distance px	10	2674.44	0.331667	365.882	7.30958	83.0933
	con_04m_m67_a3_002	con_04m_m67_a3_002.xlsx_RoiSetAuto-9.zip Distance px	80	3654.12	0.918438	365.882	9.98716	83.0933
	con_04m_m67_a3_002	con_04m_m67_a3_002.xlsx_RoiSetAuto-90.zip Distance px	35	3933.32	0.767549	365.882	10.7502	83.0933
	con_04m_m67_a3_002	con_04m_m67_a3_002.xlsx_RoiSetAuto-91.zip Distance px	28	3365.59	0.96522	365.882	9.19858	83.0933
	con_04m_m67_a3_002	con_04m_m67_a3_002.xlsx_RoiSetAuto-92.zip Distance px	11	2109.01	0.472254	365.882	5.76417	83.0933
	con_04m_m67_a3_002	con_04m_m67_a3_002.xlsx_RoiSetAuto-93.zip Distance px	10	3912.1	0.626361	365.882	10.6922	83.0933
	con_04m_m67_a3_002	con_04m_m67_a3_002.xlsx_RoiSetAuto-94.zip Distance px	13	3079.55	0.959428	365.882	8.41678	83.0933
	con_04m_m67_a3_002	con_04m_m67_a3_002.xlsx_RoiSetAuto-95.zip Distance px	29	4348.77	0.821163	365.882	11.8857	83.0933
	con_04m_m67_a3_002	con_04m_m67_a3_002.xlsx_RoiSetAuto-96.zip Distance px	3	2764.59	0.529029	365.882	7.55595	83.0933
	con_04m_m67_a3_002	con_04m_m67_a3_002.xlsx_RoiSetAuto-97.zip Distance px	6	3299.31	0.583742	365.882	9.01741	83.0933
	con_04m_m67_a3_002	con_04m_m67_a3_002.xlsx_RoiSetAuto-98.zip Distance px	6	2649.16	0.358665	365.882	7.24047	83.0933
	con_04m_m67_a3_002	con_04m_m67_a3_002.xlsx_RoiSetAuto-99.zip Distance px	3	2273.91	0.122631	365.882	6.21489	83.0933
	con_04m_m67_a3_003	con_04m_m67_a3_003.xlsx_RoiSetAuto-1.zip Distance px	3	2358.76	0.15157	276.526	8.52998	50.88
	con_04m_m67_a3_003	con_04m_m67_a3_003.xlsx_RoiSetAuto-10.zip Distance px	32	2664.26	0.668184	276.526	9.63477	50.88
	con_04m_m67_a3_003	con_04m_m67_a3_003.xlsx_RoiSetAuto-11.zip Distance px	7	2096.55	0.450745	276.526	7.58174	50.88
	con_04m_m67_a3_003	con_04m_m67_a3_003.xlsx_RoiSetAuto-12.zip Distance px	11	2309.57	0.819907	276.526	8.35209	50.88
	con_04m_m67_a3_003	con_04m_m67_a3_003.xlsx_RoiSetAuto-13.zip Distance px	13	3023.78	1.04211	276.526	10.9349	50.88
	con_04m_m67_a3_003	con_04m_m67_a3_003.xlsx_RoiSetAuto-14.zip Distance px	13	2707.09	0.608326	276.526	9.78965	50.88
	con_04m_m67_a3_003	con_04m_m67_a3_003.xlsx_RoiSetAuto-15.zip Distance px	12	2646.7	0.715922	276.526	9.57125	50.88
	con_04m_m67_a3_003	con_04m_m67_a3_003.xlsx_RoiSetAuto-16.zip Distance px	7	3511.48	0.57	276.526	12.6986	50.88
	con_04m_m67_a3_003	con_04m_m67_a3_003.xlsx_RoiSetAuto-17.zip Distance px	73	3815.71	1.31591	276.526	13.7987	50.88
	con_04m_m67_a3_003	con_04m_m67_a3_003.xlsx_RoiSetAuto-18.zip Distance px	6	2375.99	0.436067	276.526	8.59228	50.88
	con_04m_m67_a3_003	con_04m_m67_a3_003.xlsx_RoiSetAuto-19.zip Distance px	16	3026.7	0.973879	276.526	10.9454	50.88
	con_04m_m67_a3_003	con_04m_m67_a3_003.xlsx_RoiSetAuto-2.zip Distance px	4	2673.71	0.249168	276.526	9.66893	50.88
	con_04m_m67_a3_003	con_04m_m67_a3_003.xlsx_RoiSetAuto-20.zip Distance px	5	3053.39	0.424598	276.526	11.042	50.88
	con_04m_m67_a3_003	con_04m_m67_a3_003.xlsx_RoiSetAuto-21.zip Distance px	6	2032.79	0.180361	276.526	7.35116	50.88
	con_04m_m67_a3_003	con_04m_m67_a3_003.xlsx_RoiSetAuto-23.zip Distance px	19	2466.03	0.863296	276.526	8.9179	50.88
	con_04m_m67_a3_003	con_04m_m67_a3_003.xlsx_RoiSetAuto-24.zip Distance px	12	2414.74	0.688153	276.526	8.73243	50.88
	con_04m_m67_a3_003	con_04m_m67_a3_003.xlsx_RoiSetAuto-25.zip Distance px	10	2394.03	0.534562	276.526	8.65753	50.88
	con_04m_m67_a3_003	con_04m_m67_a3_003.xlsx_RoiSetAuto-27.zip Distance px	3	2559.49	0.445217	276.526	9.25588	50.88
	con_04m_m67_a3_003	con_04m_m67_a3_003.xlsx_RoiSetAuto-28.zip Distance px	3	2294.05	0.561713	276.526	8.29597	50.88
	con_04m_m67_a3_003	con_04m_m67_a3_003.xlsx_RoiSetAuto-29.zip Distance px	25	3613.85	0.706155	276.526	13.0688	50.88
	con_04m_m67_a3_003	con_04m_m67_a3_003.xlsx_RoiSetAuto-30.zip Distance px	61	4227.45	1.11367	276.526	15.2877	50.88
	con_04m_m67_a3_003	con_04m_m67_a3_003.xlsx_RoiSetAuto-31.zip Distance px	6	2005	0.460822	276.526	7.25068	50.88
	con_04m_m67_a3_003	con_04m_m67_a3_003.xlsx_RoiSetAuto-32.zip Distance px	30	3056.29	1.05006	276.526	11.0525	50.88
	con_04m_m67_a3_003	con_04m_m67_a3_003.xlsx_RoiSetAuto-34.zip Distance px	52	2751.69	0.956416	276.526	9.95092	50.88
	con_04m_m67_a3_003	con_04m_m67_a3_003.xlsx_RoiSetAuto-35.zip Distance px	4	2171.17	0.248216	276.526	7.85161	50.88
	con_04m_m67_a3_003	con_04m_m67_a3_003.xlsx_RoiSetAuto-36.zip Distance px	19	2237.84	0.695515	276.526	8.09271	50.88
	con_04m_m67_a3_003	con_04m_m67_a3_003.xlsx_RoiSetAuto-38.zip Distance px	30	2946.97	0.953747	276.526	10.6571	50.88
	con_04m_m67_a3_003	con_04m_m67_a3_003.xlsx_RoiSetAuto-39.zip Distance px	25	2537.79	0.702077	276.526	9.1774	50.88
	con_04m_m67_a3_003	con_04m_m67_a3_003.xlsx_RoiSetAuto-4.zip Distance px	39	4051.54	0.945695	276.526	14.6516	50.88
	con_04m_m67_a3_003	con_04m_m67_a3_003.xlsx_RoiSetAuto-40.zip Distance px	5	2169.32	0.378377	276.526	7.8449	50.88
	con_04m_m67_a3_003	con_04m_m67_a3_003.xlsx_RoiSetAuto-41.zip Distance px	3	2909.5	0.499582	276.526	10.5216	50.88
	con_04m_m67_a3_003	con_04m_m67_a3_003.xlsx_RoiSetAuto-42.zip Distance px	3	2479.95	0.483606	276.526	8.96824	50.88
	con_04m_m67_a3_003	con_04m_m67_a3_003.xlsx_RoiSetAuto-43.zip Distance px	7	1977.58	0.500365	276.526	7.1515	50.88
	con_04m_m67_a3_003	con_04m_m67_a3_003.xlsx_RoiSetAuto-44.zip Distance px	30	3500.04	0.915796	276.526	12.6572	50.88
	con_04m_m67_a3_003	con_04m_m67_a3_003.xlsx_RoiSetAuto-45.zip Distance px	10	2323.09	0.637473	276.526	8.40099	50.88
	con_04m_m67_a3_003	con_04m_m67_a3_003.xlsx_RoiSetAuto-46.zip Distance px	10	2654.45	1.18773	276.526	9.5993	50.88
	con_04m_m67_a3_003	con_04m_m67_a3_003.xlsx_RoiSetAuto-47.zip Distance px	9	2979.43	0.693895	276.526	10.7745	50.88
	con_04m_m67_a3_003	con_04m_m67_a3_003.xlsx_RoiSetAuto-49.zip Distance px	57	5491.74	1.27356	276.526	19.8598	50.88
	con_04m_m67_a3_003	con_04m_m67_a3_003.xlsx_RoiSetAuto-5.zip Distance px	6	2406.39	0.833249	276.526	8.70222	50.88
	con_04m_m67_a3_003	con_04m_m67_a3_003.xlsx_RoiSetAuto-50.zip Distance px	4	2257.8	0.207671	276.526	8.16489	50.88
	con_04m_m67_a3_003	con_04m_m67_a3_003.xlsx_RoiSetAuto-51.zip Distance px	21	3696.24	1.06708	276.526	13.3667	50.88
	con_04m_m67_a3_003	con_04m_m67_a3_003.xlsx_RoiSetAuto-52.zip Distance px	7	3616.65	0.65578	276.526	13.0789	50.88
	con_04m_m67_a3_003	con_04m_m67_a3_003.xlsx_RoiSetAuto-53.zip Distance px	9	2002.46	0.881865	276.526	7.24148	50.88
	con_04m_m67_a3_003	con_04m_m67_a3_003.xlsx_RoiSetAuto-54.zip Distance px	7	2783.05	0.785296	276.526	10.0643	50.88
	con_04m_m67_a3_003	con_04m_m67_a3_003.xlsx_RoiSetAuto-55.zip Distance px	4	2441.68	0.607065	276.526	8.82985	50.88
	con_04m_m67_a3_003	con_04m_m67_a3_003.xlsx_RoiSetAuto-56.zip Distance px	20	2981.68	0.620179	276.526	10.7827	50.88
	con_04m_m67_a3_003	con_04m_m67_a3_003.xlsx_RoiSetAuto-57.zip Distance px	3	2112.5	0.185911	276.526	7.63942	50.88
	con_04m_m67_a3_003	con_04m_m67_a3_003.xlsx_RoiSetAuto-58.zip Distance px	17	3176.99	0.909669	276.526	11.4889	50.88
	con_04m_m67_a3_003	con_04m_m67_a3_003.xlsx_RoiSetAuto-59.zip Distance px	29	3325.83	0.793342	276.526	12.0272	50.88
	con_04m_m67_a3_003	con_04m_m67_a3_003.xlsx_RoiSetAuto-6.zip Distance px	61	3765.09	1.03744	276.526	13.6157	50.88
	con_04m_m67_a3_003	con_04m_m67_a3_003.xlsx_RoiSetAuto-60.zip Distance px	19	3368.37	1.0725	276.526	12.181	50.88
	con_04m_m67_a3_003	con_04m_m67_a3_003.xlsx_RoiSetAuto-61.zip Distance px	44	5673.67	0.766392	276.526	20.5177	50.88
	con_04m_m67_a3_003	con_04m_m67_a3_003.xlsx_RoiSetAuto-62.zip Distance px	5	2109.55	0.22565	276.526	7.62876	50.88
	con_04m_m67_a3_003	con_04m_m67_a3_003.xlsx_RoiSetAuto-63.zip Distance px	3	2452.17	0.354767	276.526	8.86778	50.88
	con_04m_m67_a3_003	con_04m_m67_a3_003.xlsx_RoiSetAuto-64.zip Distance px	13	2394.83	0.631535	276.526	8.66042	50.88
	con_04m_m67_a3_003	con_04m_m67_a3_003.xlsx_RoiSetAuto-65.zip Distance px	5	2314.54	0.187023	276.526	8.37007	50.88
	con_04m_m67_a3_003	con_04m_m67_a3_003.xlsx_RoiSetAuto-66.zip Distance px	6	2116.54	0.406313	276.526	7.65405	50.88
	con_04m_m67_a3_003	con_04m_m67_a3_003.xlsx_RoiSetAuto-67.zip Distance px	4	2254.21	0.493601	276.526	8.15191	50.88
	con_04m_m67_a3_003	con_04m_m67_a3_003.xlsx_RoiSetAuto-68.zip Distance px	5	3029.83	0.496901	276.526	10.9568	50.88
	con_04m_m67_a3_003	con_04m_m67_a3_003.xlsx_RoiSetAuto-7.zip Distance px	17	2366.53	0.58145	276.526	8.55808	50.88
	con_04m_m67_a3_003	con_04m_m67_a3_003.xlsx_RoiSetAuto-70.zip Distance px	5	2282.24	0.601424	276.526	8.25326	50.88
	con_04m_m67_a3_003	con_04m_m67_a3_003.xlsx_RoiSetAuto-71.zip Distance px	10	2286.45	0.756102	276.526	8.26847	50.88
	con_04m_m67_a3_003	con_04m_m67_a3_003.xlsx_RoiSetAuto-72.zip Distance px	3	2097.26	0.24812	276.526	7.58432	50.88
	con_04m_m67_a3_003	con_04m_m67_a3_003.xlsx_RoiSetAuto-73.zip Distance px	10	2623.07	0.772093	276.526	9.48579	50.88
	con_04m_m67_a3_003	con_04m_m67_a3_003.xlsx_RoiSetAuto-74.zip Distance px	3	2991.74	1.26932	276.526	10.819	50.88
	con_04m_m67_a3_003	con_04m_m67_a3_003.xlsx_RoiSetAuto-75.zip Distance px	6	2351.42	0.125233	276.526	8.50343	50.88
	con_04m_m67_a3_003	con_04m_m67_a3_003.xlsx_RoiSetAuto-76.zip Distance px	48	4264.66	0.91958	276.526	15.4223	50.88
	con_04m_m67_a3_003	con_04m_m67_a3_003.xlsx_RoiSetAuto-77.zip Distance px	14	2726.28	0.738712	276.526	9.85905	50.88
	con_04m_m67_a3_003	con_04m_m67_a3_003.xlsx_RoiSetAuto-78.zip Distance px	29	2365.44	0.843832	276.526	8.55415	50.88
	con_04m_m67_a3_003	con_04m_m67_a3_003.xlsx_RoiSetAuto-79.zip Distance px	5	2040.94	0.48075	276.526	7.38066	50.88
	con_04m_m67_a3_003	con_04m_m67_a3_003.xlsx_RoiSetAuto-8.zip Distance px	5	2346.14	0.499411	276.526	8.48436	50.88
	con_04m_m67_a3_003	con_04m_m67_a3_003.xlsx_RoiSetAuto-80.zip Distance px	5	1972.9	0.623291	276.526	7.13461	50.88
	con_04m_m67_a3_003	con_04m_m67_a3_003.xlsx_RoiSetAuto-81.zip Distance px	4	2414.64	0.372331	276.526	8.73207	50.88
	con_04m_m67_a3_003	con_04m_m67_a3_003.xlsx_RoiSetAuto-82.zip Distance px	3	2432.64	0.815433	276.526	8.79714	50.88
	con_04m_m67_a3_003	con_04m_m67_a3_003.xlsx_RoiSetAuto-83.zip Distance px	7	2082.5	0.222152	276.526	7.53095	50.88
	con_04m_m67_a3_003	con_04m_m67_a3_003.xlsx_RoiSetAuto-84.zip Distance px	9	2544.78	0.45552	276.526	9.20269	50.88
	con_04m_m67_a3_003	con_04m_m67_a3_003.xlsx_RoiSetAuto-85.zip Distance px	11	6295.33	0.367406	276.526	22.7658	50.88
	con_04m_m67_a3_003	con_04m_m67_a3_003.xlsx_RoiSetAuto-86.zip Distance px	16	3088.58	0.855162	276.526	11.1692	50.88
	con_04m_m67_a3_003	con_04m_m67_a3_003.xlsx_RoiSetAuto-87.zip Distance px	15	2904.6	0.899971	276.526	10.5039	50.88
	con_04m_m67_a3_003	con_04m_m67_a3_003.xlsx_RoiSetAuto-89.zip Distance px	11	2286.14	0.802065	276.526	8.26738	50.88
	con_04m_m67_a3_003	con_04m_m67_a3_003.xlsx_RoiSetAuto-90.zip Distance px	8	1895.04	0.538827	276.526	6.85302	50.88
	con_04m_m67_a3_003	con_04m_m67_a3_003.xlsx_RoiSetAuto-91.zip Distance px	12	2069.98	0.526672	276.526	7.48565	50.88
	con_04m_m67_a3_003	con_04m_m67_a3_003.xlsx_RoiSetAuto-92.zip Distance px	15	2513.7	0.742738	276.526	9.09029	50.88
	con_04m_m67_a3_003	con_04m_m67_a3_003.xlsx_RoiSetAuto-93.zip Distance px	14	2811.71	0.893582	276.526	10.168	50.88
	con_04m_m67_a3_003	con_04m_m67_a3_003.xlsx_RoiSetAuto-95.zip Distance px	9	5855.88	0.254155	276.526	21.1766	50.88
	con_04m_m67_a3_003	con_04m_m67_a3_003.xlsx_RoiSetAuto-96.zip Distance px	4	3025.3	0.392884	276.526	10.9404	50.88
	con_04m_m67_a3_003	con_04m_m67_a3_003.xlsx_RoiSetAuto-99.zip Distance px	3	2587	0.837374	276.526	9.35536	50.88
	con_05m_m67_a3_001	con_05m_m67_a3_001.xlsx_RoiSetAuto-100.zip Distance px	7	2597.7	0.26101	304.82	8.52207	58.6311
	con_05m_m67_a3_001	con_05m_m67_a3_001.xlsx_RoiSetAuto-101.zip Distance px	5	2539.9	0.306593	304.82	8.33245	58.6311
	con_05m_m67_a3_001	con_05m_m67_a3_001.xlsx_RoiSetAuto-102.zip Distance px	6	4979.35	0.383951	304.82	16.3354	58.6311
	con_05m_m67_a3_001	con_05m_m67_a3_001.xlsx_RoiSetAuto-12.zip Distance px	3	2344.64	0.154894	304.82	7.69187	58.6311
	con_05m_m67_a3_001	con_05m_m67_a3_001.xlsx_RoiSetAuto-13.zip Distance px	54	4101.88	1.23107	304.82	13.4567	58.6311
	con_05m_m67_a3_001	con_05m_m67_a3_001.xlsx_RoiSetAuto-14.zip Distance px	6	2469.07	0.288298	304.82	8.10009	58.6311
	con_05m_m67_a3_001	con_05m_m67_a3_001.xlsx_RoiSetAuto-16.zip Distance px	4	2875.14	0.305352	304.82	9.43224	58.6311
	con_05m_m67_a3_001	con_05m_m67_a3_001.xlsx_RoiSetAuto-18.zip Distance px	4	2894.5	0.304152	304.82	9.49576	58.6311
	con_05m_m67_a3_001	con_05m_m67_a3_001.xlsx_RoiSetAuto-19.zip Distance px	4	2064.43	0.100509	304.82	6.77263	58.6311
	con_05m_m67_a3_001	con_05m_m67_a3_001.xlsx_RoiSetAuto-2.zip Distance px	28	4870.2	1.06582	304.82	15.9773	58.6311
	con_05m_m67_a3_001	con_05m_m67_a3_001.xlsx_RoiSetAuto-21.zip Distance px	134	5720.67	0.932251	304.82	18.7673	58.6311
	con_05m_m67_a3_001	con_05m_m67_a3_001.xlsx_RoiSetAuto-25.zip Distance px	23	2830.7	0.834155	304.82	9.28647	58.6311
	con_05m_m67_a3_001	con_05m_m67_a3_001.xlsx_RoiSetAuto-26.zip Distance px	6	2390.27	0.345682	304.82	7.84157	58.6311
	con_05m_m67_a3_001	con_05m_m67_a3_001.xlsx_RoiSetAuto-27.zip Distance px	3	2297.94	0.256891	304.82	7.53867	58.6311
	con_05m_m67_a3_001	con_05m_m67_a3_001.xlsx_RoiSetAuto-28.zip Distance px	17	2573.13	0.574317	304.82	8.44146	58.6311
	con_05m_m67_a3_001	con_05m_m67_a3_001.xlsx_RoiSetAuto-29.zip Distance px	46	4064.95	1.08571	304.82	13.3356	58.6311
	con_05m_m67_a3_001	con_05m_m67_a3_001.xlsx_RoiSetAuto-3.zip Distance px	18	2410.8	0.405936	304.82	7.90893	58.6311
	con_05m_m67_a3_001	con_05m_m67_a3_001.xlsx_RoiSetAuto-30.zip Distance px	11	2827.12	0.517741	304.82	9.27471	58.6311
	con_05m_m67_a3_001	con_05m_m67_a3_001.xlsx_RoiSetAuto-31.zip Distance px	9	2795.39	0.328757	304.82	9.1706	58.6311
	con_05m_m67_a3_001	con_05m_m67_a3_001.xlsx_RoiSetAuto-34.zip Distance px	74	3642.36	1.21105	304.82	11.9492	58.6311
	con_05m_m67_a3_001	con_05m_m67_a3_001.xlsx_RoiSetAuto-37.zip Distance px	3	2222.59	0.264006	304.82	7.29146	58.6311
	con_05m_m67_a3_001	con_05m_m67_a3_001.xlsx_RoiSetAuto-39.zip Distance px	26	3650.44	0.707729	304.82	11.9757	58.6311
	con_05m_m67_a3_001	con_05m_m67_a3_001.xlsx_RoiSetAuto-4.zip Distance px	7	2507.8	0.711782	304.82	8.22713	58.6311
	con_05m_m67_a3_001	con_05m_m67_a3_001.xlsx_RoiSetAuto-41.zip Distance px	8	2706.52	0.458977	304.82	8.87905	58.6311
	con_05m_m67_a3_001	con_05m_m67_a3_001.xlsx_RoiSetAuto-42.zip Distance px	9	2578.53	0.302017	304.82	8.45916	58.6311
	con_05m_m67_a3_001	con_05m_m67_a3_001.xlsx_RoiSetAuto-43.zip Distance px	6	2805.03	0.470044	304.82	9.20225	58.6311
	con_05m_m67_a3_001	con_05m_m67_a3_001.xlsx_RoiSetAuto-46.zip Distance px	45	3847.47	0.929308	304.82	12.6221	58.6311
	con_05m_m67_a3_001	con_05m_m67_a3_001.xlsx_RoiSetAuto-48.zip Distance px	6	2266.41	0.631958	304.82	7.43522	58.6311
	con_05m_m67_a3_001	con_05m_m67_a3_001.xlsx_RoiSetAuto-49.zip Distance px	9	2061.5	0.497819	304.82	6.76301	58.6311
	con_05m_m67_a3_001	con_05m_m67_a3_001.xlsx_RoiSetAuto-5.zip Distance px	32	3710.81	0.785713	304.82	12.1737	58.6311
	con_05m_m67_a3_001	con_05m_m67_a3_001.xlsx_RoiSetAuto-50.zip Distance px	13	2562.26	0.588322	304.82	8.40581	58.6311
	con_05m_m67_a3_001	con_05m_m67_a3_001.xlsx_RoiSetAuto-51.zip Distance px	6	2377.22	0.344715	304.82	7.79875	58.6311
	con_05m_m67_a3_001	con_05m_m67_a3_001.xlsx_RoiSetAuto-52.zip Distance px	4	2285.25	0.572889	304.82	7.49703	58.6311
	con_05m_m67_a3_001	con_05m_m67_a3_001.xlsx_RoiSetAuto-53.zip Distance px	10	2487.05	0.583679	304.82	8.15908	58.6311
	con_05m_m67_a3_001	con_05m_m67_a3_001.xlsx_RoiSetAuto-54.zip Distance px	5	2467.95	0.498928	304.82	8.09641	58.6311
	con_05m_m67_a3_001	con_05m_m67_a3_001.xlsx_RoiSetAuto-55.zip Distance px	3	2292.93	0.23283	304.82	7.52225	58.6311
	con_05m_m67_a3_001	con_05m_m67_a3_001.xlsx_RoiSetAuto-56.zip Distance px	30	3262.2	0.761535	304.82	10.702	58.6311
	con_05m_m67_a3_001	con_05m_m67_a3_001.xlsx_RoiSetAuto-57.zip Distance px	11	3062.03	0.54226	304.82	10.0454	58.6311
	con_05m_m67_a3_001	con_05m_m67_a3_001.xlsx_RoiSetAuto-59.zip Distance px	26	3062.14	0.9145	304.82	10.0457	58.6311
	con_05m_m67_a3_001	con_05m_m67_a3_001.xlsx_RoiSetAuto-6.zip Distance px	21	3354.5	0.825566	304.82	11.0048	58.6311
	con_05m_m67_a3_001	con_05m_m67_a3_001.xlsx_RoiSetAuto-60.zip Distance px	6	3091.51	0.559314	304.82	10.1421	58.6311
	con_05m_m67_a3_001	con_05m_m67_a3_001.xlsx_RoiSetAuto-61.zip Distance px	5	2744.84	0.72576	304.82	9.00477	58.6311
	con_05m_m67_a3_001	con_05m_m67_a3_001.xlsx_RoiSetAuto-63.zip Distance px	30	2772.99	0.885198	304.82	9.09713	58.6311
	con_05m_m67_a3_001	con_05m_m67_a3_001.xlsx_RoiSetAuto-64.zip Distance px	8	2365.9	0.415503	304.82	7.76161	58.6311
	con_05m_m67_a3_001	con_05m_m67_a3_001.xlsx_RoiSetAuto-65.zip Distance px	5	2693.24	0.401265	304.82	8.83548	58.6311
	con_05m_m67_a3_001	con_05m_m67_a3_001.xlsx_RoiSetAuto-67.zip Distance px	7	2501.79	0.25717	304.82	8.20741	58.6311
	con_05m_m67_a3_001	con_05m_m67_a3_001.xlsx_RoiSetAuto-69.zip Distance px	4	2637.82	0.274286	304.82	8.65367	58.6311
	con_05m_m67_a3_001	con_05m_m67_a3_001.xlsx_RoiSetAuto-7.zip Distance px	20	3405.68	0.458174	304.82	11.1727	58.6311
	con_05m_m67_a3_001	con_05m_m67_a3_001.xlsx_RoiSetAuto-70.zip Distance px	17	2381.42	0.42007	304.82	7.81252	58.6311
	con_05m_m67_a3_001	con_05m_m67_a3_001.xlsx_RoiSetAuto-71.zip Distance px	4	2499.38	0.336218	304.82	8.19951	58.6311
	con_05m_m67_a3_001	con_05m_m67_a3_001.xlsx_RoiSetAuto-72.zip Distance px	40	3092.6	0.934425	304.82	10.1457	58.6311
	con_05m_m67_a3_001	con_05m_m67_a3_001.xlsx_RoiSetAuto-73.zip Distance px	32	3109.17	0.927202	304.82	10.2	58.6311
	con_05m_m67_a3_001	con_05m_m67_a3_001.xlsx_RoiSetAuto-74.zip Distance px	23	3572.96	0.81879	304.82	11.7215	58.6311
	con_05m_m67_a3_001	con_05m_m67_a3_001.xlsx_RoiSetAuto-75.zip Distance px	3	2431.93	0.144614	304.82	7.97822	58.6311
	con_05m_m67_a3_001	con_05m_m67_a3_001.xlsx_RoiSetAuto-76.zip Distance px	12	2449.85	0.595016	304.82	8.03703	58.6311
	con_05m_m67_a3_001	con_05m_m67_a3_001.xlsx_RoiSetAuto-77.zip Distance px	5	2352.72	0.551727	304.82	7.71836	58.6311
	con_05m_m67_a3_001	con_05m_m67_a3_001.xlsx_RoiSetAuto-78.zip Distance px	3	2127.26	0.300719	304.82	6.97874	58.6311
	con_05m_m67_a3_001	con_05m_m67_a3_001.xlsx_RoiSetAuto-79.zip Distance px	4	2124.47	0.230637	304.82	6.96959	58.6311
	con_05m_m67_a3_001	con_05m_m67_a3_001.xlsx_RoiSetAuto-8.zip Distance px	78	4421.17	1.34227	304.82	14.5042	58.6311
	con_05m_m67_a3_001	con_05m_m67_a3_001.xlsx_RoiSetAuto-80.zip Distance px	7	2815.1	0.457549	304.82	9.23527	58.6311
	con_05m_m67_a3_001	con_05m_m67_a3_001.xlsx_RoiSetAuto-82.zip Distance px	4	2072.82	0.253525	304.82	6.80012	58.6311
	con_05m_m67_a3_001	con_05m_m67_a3_001.xlsx_RoiSetAuto-83.zip Distance px	4	2463.36	0.235132	304.82	8.08133	58.6311
	con_05m_m67_a3_001	con_05m_m67_a3_001.xlsx_RoiSetAuto-84.zip Distance px	3	2586.38	0.207669	304.82	8.48493	58.6311
	con_05m_m67_a3_001	con_05m_m67_a3_001.xlsx_RoiSetAuto-85.zip Distance px	5	2605.84	0.74381	304.82	8.54877	58.6311
	con_05m_m67_a3_001	con_05m_m67_a3_001.xlsx_RoiSetAuto-87.zip Distance px	35	2696.88	0.760416	304.82	8.84745	58.6311
	con_05m_m67_a3_001	con_05m_m67_a3_001.xlsx_RoiSetAuto-88.zip Distance px	3	2106.09	0.048249	304.82	6.90929	58.6311
	con_05m_m67_a3_001	con_05m_m67_a3_001.xlsx_RoiSetAuto-90.zip Distance px	35	3428.4	1.00639	304.82	11.2473	58.6311
	con_05m_m67_a3_001	con_05m_m67_a3_001.xlsx_RoiSetAuto-92.zip Distance px	19	3429.89	0.755423	304.82	11.2522	58.6311
	con_05m_m67_a3_001	con_05m_m67_a3_001.xlsx_RoiSetAuto-93.zip Distance px	26	2757.51	0.659774	304.82	9.04633	58.6311
	con_05m_m67_a3_001	con_05m_m67_a3_001.xlsx_RoiSetAuto-94.zip Distance px	27	4865.48	0.978813	304.82	15.9618	58.6311
	con_05m_m67_a3_001	con_05m_m67_a3_001.xlsx_RoiSetAuto-95.zip Distance px	5	2423.78	0.596871	304.82	7.9515	58.6311
	con_05m_m67_a3_001	con_05m_m67_a3_001.xlsx_RoiSetAuto-96.zip Distance px	3	2172.01	0.622214	304.82	7.12555	58.6311
	con_05m_m67_a3_001	con_05m_m67_a3_001.xlsx_RoiSetAuto-98.zip Distance px	5	2286.99	0.682542	304.82	7.50275	58.6311
	con_05m_m67_a3_001	con_05m_m67_a3_001.xlsx_RoiSetAuto-99.zip Distance px	3	2237.09	0.565725	304.82	7.33904	58.6311
	con_06m_m67_a3_001	con_06m_m67_a3_001.xlsx_RoiSetAuto-1.zip Distance px	41	5771.14	1.12942	411.949	14.0094	45.8667
	con_06m_m67_a3_001	con_06m_m67_a3_001.xlsx_RoiSetAuto-10.zip Distance px	3	2733.77	0.160462	411.949	6.63619	45.8667
	con_06m_m67_a3_001	con_06m_m67_a3_001.xlsx_RoiSetAuto-12.zip Distance px	41	5762.49	1.1081	411.949	13.9884	45.8667
	con_06m_m67_a3_001	con_06m_m67_a3_001.xlsx_RoiSetAuto-13.zip Distance px	9	2962.24	0.34953	411.949	7.19079	45.8667
	con_06m_m67_a3_001	con_06m_m67_a3_001.xlsx_RoiSetAuto-15.zip Distance px	7	3529.44	0.459283	411.949	8.56768	45.8667
	con_06m_m67_a3_001	con_06m_m67_a3_001.xlsx_RoiSetAuto-16.zip Distance px	19	3466.36	0.612934	411.949	8.41455	45.8667
	con_06m_m67_a3_001	con_06m_m67_a3_001.xlsx_RoiSetAuto-17.zip Distance px	9	3359.96	0.675258	411.949	8.15625	45.8667
	con_06m_m67_a3_001	con_06m_m67_a3_001.xlsx_RoiSetAuto-18.zip Distance px	5	3610.66	0.388051	411.949	8.76483	45.8667
	con_06m_m67_a3_001	con_06m_m67_a3_001.xlsx_RoiSetAuto-2.zip Distance px	5	3558.15	0.363521	411.949	8.63737	45.8667
	con_06m_m67_a3_001	con_06m_m67_a3_001.xlsx_RoiSetAuto-20.zip Distance px	6	3224.19	0.38536	411.949	7.82667	45.8667
	con_06m_m67_a3_001	con_06m_m67_a3_001.xlsx_RoiSetAuto-21.zip Distance px	5	3236.65	0.294596	411.949	7.85693	45.8667
	con_06m_m67_a3_001	con_06m_m67_a3_001.xlsx_RoiSetAuto-22.zip Distance px	3	3313.82	0.064563	411.949	8.04426	45.8667
	con_06m_m67_a3_001	con_06m_m67_a3_001.xlsx_RoiSetAuto-23.zip Distance px	11	3420.3	0.432387	411.949	8.30274	45.8667
	con_06m_m67_a3_001	con_06m_m67_a3_001.xlsx_RoiSetAuto-26.zip Distance px	6	3339.06	0.351043	411.949	8.10552	45.8667
	con_06m_m67_a3_001	con_06m_m67_a3_001.xlsx_RoiSetAuto-27.zip Distance px	23	3663.03	0.493592	411.949	8.89194	45.8667
	con_06m_m67_a3_001	con_06m_m67_a3_001.xlsx_RoiSetAuto-29.zip Distance px	4	3031.68	0.41915	411.949	7.35936	45.8667
	con_06m_m67_a3_001	con_06m_m67_a3_001.xlsx_RoiSetAuto-3.zip Distance px	65	8103.07	1.00316	411.949	19.6701	45.8667
	con_06m_m67_a3_001	con_06m_m67_a3_001.xlsx_RoiSetAuto-30.zip Distance px	16	3605.55	0.511596	411.949	8.75242	45.8667
	con_06m_m67_a3_001	con_06m_m67_a3_001.xlsx_RoiSetAuto-31.zip Distance px	9	3591.93	0.44778	411.949	8.71936	45.8667
	con_06m_m67_a3_001	con_06m_m67_a3_001.xlsx_RoiSetAuto-32.zip Distance px	49	5120.81	0.605836	411.949	12.4307	45.8667
	con_06m_m67_a3_001	con_06m_m67_a3_001.xlsx_RoiSetAuto-33.zip Distance px	4	3358.18	0.232949	411.949	8.15194	45.8667
	con_06m_m67_a3_001	con_06m_m67_a3_001.xlsx_RoiSetAuto-34.zip Distance px	7	3337.83	0.346874	411.949	8.10254	45.8667
	con_06m_m67_a3_001	con_06m_m67_a3_001.xlsx_RoiSetAuto-35.zip Distance px	6	3769.52	0.27004	411.949	9.15046	45.8667
	con_06m_m67_a3_001	con_06m_m67_a3_001.xlsx_RoiSetAuto-36.zip Distance px	33	7948.24	0.456027	411.949	19.2942	45.8667
	con_06m_m67_a3_001	con_06m_m67_a3_001.xlsx_RoiSetAuto-38.zip Distance px	3	3895.85	0.523207	411.949	9.45713	45.8667
	con_06m_m67_a3_001	con_06m_m67_a3_001.xlsx_RoiSetAuto-4.zip Distance px	19	4997.48	0.645731	411.949	12.1313	45.8667
	con_06m_m67_a3_001	con_06m_m67_a3_001.xlsx_RoiSetAuto-41.zip Distance px	29	4530.26	0.657787	411.949	10.9971	45.8667
	con_06m_m67_a3_001	con_06m_m67_a3_001.xlsx_RoiSetAuto-42.zip Distance px	30	4909.85	0.456032	411.949	11.9186	45.8667
	con_06m_m67_a3_001	con_06m_m67_a3_001.xlsx_RoiSetAuto-45.zip Distance px	13	3717.81	0.682522	411.949	9.02492	45.8667
	con_06m_m67_a3_001	con_06m_m67_a3_001.xlsx_RoiSetAuto-46.zip Distance px	4	3370.93	0.252908	411.949	8.18289	45.8667
	con_06m_m67_a3_001	con_06m_m67_a3_001.xlsx_RoiSetAuto-47.zip Distance px	4	3307.95	0.148364	411.949	8.03001	45.8667
	con_06m_m67_a3_001	con_06m_m67_a3_001.xlsx_RoiSetAuto-49.zip Distance px	4	3666.04	0.348933	411.949	8.89925	45.8667
	con_06m_m67_a3_001	con_06m_m67_a3_001.xlsx_RoiSetAuto-5.zip Distance px	4	3835.75	0.478697	411.949	9.31124	45.8667
	con_06m_m67_a3_001	con_06m_m67_a3_001.xlsx_RoiSetAuto-50.zip Distance px	7	4414.07	0.405488	411.949	10.7151	45.8667
	con_06m_m67_a3_001	con_06m_m67_a3_001.xlsx_RoiSetAuto-51.zip Distance px	6	9029.05	0.240655	411.949	21.9179	45.8667
	con_06m_m67_a3_001	con_06m_m67_a3_001.xlsx_RoiSetAuto-7.zip Distance px	20	6572.19	1.31073	411.949	15.9539	45.8667
	con_06m_m67_a3_001	con_06m_m67_a3_001.xlsx_RoiSetAuto-8.zip Distance px	17	3675.73	0.411419	411.949	8.92277	45.8667
	con_06m_m67_a3_001	con_06m_m67_a3_001.xlsx_RoiSetAuto-9.zip Distance px	26	4181.06	0.85997	411.949	10.1495	45.8667
	con_06m_m67_a3_002	con_06m_m67_a3_002.xlsx_RoiSetAuto-1.zip Distance px	6	3163.92	0.400381	355.508	8.89972	60.1778
	con_06m_m67_a3_002	con_06m_m67_a3_002.xlsx_RoiSetAuto-10.zip Distance px	50	3501.59	0.797975	355.508	9.84954	60.1778
	con_06m_m67_a3_002	con_06m_m67_a3_002.xlsx_RoiSetAuto-100.zip Distance px	6	3924.53	0.642566	355.508	11.0392	60.1778
	con_06m_m67_a3_002	con_06m_m67_a3_002.xlsx_RoiSetAuto-101.zip Distance px	3	3513.51	0.481921	355.508	9.88305	60.1778
	con_06m_m67_a3_002	con_06m_m67_a3_002.xlsx_RoiSetAuto-103.zip Distance px	6	3254.33	0.343694	355.508	9.15403	60.1778
	con_06m_m67_a3_002	con_06m_m67_a3_002.xlsx_RoiSetAuto-104.zip Distance px	5	4046.22	0.705769	355.508	11.3815	60.1778
	con_06m_m67_a3_002	con_06m_m67_a3_002.xlsx_RoiSetAuto-105.zip Distance px	17	3908.66	0.715638	355.508	10.9946	60.1778
	con_06m_m67_a3_002	con_06m_m67_a3_002.xlsx_RoiSetAuto-106.zip Distance px	11	4798.04	0.852192	355.508	13.4963	60.1778
	con_06m_m67_a3_002	con_06m_m67_a3_002.xlsx_RoiSetAuto-107.zip Distance px	22	3800.55	1.01895	355.508	10.6905	60.1778
	con_06m_m67_a3_002	con_06m_m67_a3_002.xlsx_RoiSetAuto-109.zip Distance px	32	7352.47	0.949078	355.508	20.6816	60.1778
	con_06m_m67_a3_002	con_06m_m67_a3_002.xlsx_RoiSetAuto-11.zip Distance px	32	4896.81	0.736688	355.508	13.7741	60.1778
	con_06m_m67_a3_002	con_06m_m67_a3_002.xlsx_RoiSetAuto-110.zip Distance px	5	3611.77	0.317109	355.508	10.1595	60.1778
	con_06m_m67_a3_002	con_06m_m67_a3_002.xlsx_RoiSetAuto-111.zip Distance px	18	3334.76	0.550735	355.508	9.38025	60.1778
	con_06m_m67_a3_002	con_06m_m67_a3_002.xlsx_RoiSetAuto-112.zip Distance px	6	3981.04	0.450332	355.508	11.1982	60.1778
	con_06m_m67_a3_002	con_06m_m67_a3_002.xlsx_RoiSetAuto-113.zip Distance px	16	4554.72	0.640417	355.508	12.8119	60.1778
	con_06m_m67_a3_002	con_06m_m67_a3_002.xlsx_RoiSetAuto-114.zip Distance px	5	3104.27	0.446906	355.508	8.73192	60.1778
	con_06m_m67_a3_002	con_06m_m67_a3_002.xlsx_RoiSetAuto-115.zip Distance px	24	7067.12	1.28876	355.508	19.8789	60.1778
	con_06m_m67_a3_002	con_06m_m67_a3_002.xlsx_RoiSetAuto-116.zip Distance px	3	3414.08	0.491949	355.508	9.60338	60.1778
	con_06m_m67_a3_002	con_06m_m67_a3_002.xlsx_RoiSetAuto-117.zip Distance px	20	5539.49	0.719657	355.508	15.5819	60.1778
	con_06m_m67_a3_002	con_06m_m67_a3_002.xlsx_RoiSetAuto-118.zip Distance px	16	4349.17	0.738481	355.508	12.2337	60.1778
	con_06m_m67_a3_002	con_06m_m67_a3_002.xlsx_RoiSetAuto-119.zip Distance px	6	3213.39	0.629624	355.508	9.03885	60.1778
	con_06m_m67_a3_002	con_06m_m67_a3_002.xlsx_RoiSetAuto-12.zip Distance px	14	3550.47	0.636945	355.508	9.98704	60.1778
	con_06m_m67_a3_002	con_06m_m67_a3_002.xlsx_RoiSetAuto-120.zip Distance px	7	3206.82	0.418173	355.508	9.0204	60.1778
	con_06m_m67_a3_002	con_06m_m67_a3_002.xlsx_RoiSetAuto-121.zip Distance px	13	3704.31	0.701547	355.508	10.4198	60.1778
	con_06m_m67_a3_002	con_06m_m67_a3_002.xlsx_RoiSetAuto-122.zip Distance px	7	3322.05	0.641763	355.508	9.3445	60.1778
	con_06m_m67_a3_002	con_06m_m67_a3_002.xlsx_RoiSetAuto-124.zip Distance px	9	3764.6	0.846401	355.508	10.5893	60.1778
	con_06m_m67_a3_002	con_06m_m67_a3_002.xlsx_RoiSetAuto-125.zip Distance px	11	4017.49	0.503085	355.508	11.3007	60.1778
	con_06m_m67_a3_002	con_06m_m67_a3_002.xlsx_RoiSetAuto-126.zip Distance px	10	4386.95	0.908427	355.508	12.3399	60.1778
	con_06m_m67_a3_002	con_06m_m67_a3_002.xlsx_RoiSetAuto-127.zip Distance px	10	4401.05	0.501378	355.508	12.3796	60.1778
	con_06m_m67_a3_002	con_06m_m67_a3_002.xlsx_RoiSetAuto-129.zip Distance px	3	4102.49	0.489728	355.508	11.5398	60.1778
	con_06m_m67_a3_002	con_06m_m67_a3_002.xlsx_RoiSetAuto-13.zip Distance px	5	2355.76	0.416364	355.508	6.62646	60.1778
	con_06m_m67_a3_002	con_06m_m67_a3_002.xlsx_RoiSetAuto-130.zip Distance px	6	3507.8	0.634704	355.508	9.867	60.1778
	con_06m_m67_a3_002	con_06m_m67_a3_002.xlsx_RoiSetAuto-131.zip Distance px	3	3617.22	0.43153	355.508	10.1748	60.1778
	con_06m_m67_a3_002	con_06m_m67_a3_002.xlsx_RoiSetAuto-15.zip Distance px	8	2719.49	0.362775	355.508	7.64958	60.1778
	con_06m_m67_a3_002	con_06m_m67_a3_002.xlsx_RoiSetAuto-16.zip Distance px	27	3886.32	1.13839	355.508	10.9317	60.1778
	con_06m_m67_a3_002	con_06m_m67_a3_002.xlsx_RoiSetAuto-18.zip Distance px	125	7575.99	1.14917	355.508	21.3103	60.1778
	con_06m_m67_a3_002	con_06m_m67_a3_002.xlsx_RoiSetAuto-2.zip Distance px	111	4088.46	1.10976	355.508	11.5003	60.1778
	con_06m_m67_a3_002	con_06m_m67_a3_002.xlsx_RoiSetAuto-20.zip Distance px	45	5552.94	1.11834	355.508	15.6197	60.1778
	con_06m_m67_a3_002	con_06m_m67_a3_002.xlsx_RoiSetAuto-21.zip Distance px	6	2352.31	0.195358	355.508	6.61677	60.1778
	con_06m_m67_a3_002	con_06m_m67_a3_002.xlsx_RoiSetAuto-22.zip Distance px	3	2711.5	0.121991	355.508	7.62712	60.1778
	con_06m_m67_a3_002	con_06m_m67_a3_002.xlsx_RoiSetAuto-24.zip Distance px	18	3548.63	0.849953	355.508	9.98185	60.1778
	con_06m_m67_a3_002	con_06m_m67_a3_002.xlsx_RoiSetAuto-25.zip Distance px	18	4205.89	0.727769	355.508	11.8307	60.1778
	con_06m_m67_a3_002	con_06m_m67_a3_002.xlsx_RoiSetAuto-26.zip Distance px	26	3292.93	0.567548	355.508	9.26259	60.1778
	con_06m_m67_a3_002	con_06m_m67_a3_002.xlsx_RoiSetAuto-27.zip Distance px	21	3322.32	0.668455	355.508	9.34527	60.1778
	con_06m_m67_a3_002	con_06m_m67_a3_002.xlsx_RoiSetAuto-28.zip Distance px	10	3064.5	0.286958	355.508	8.62005	60.1778
	con_06m_m67_a3_002	con_06m_m67_a3_002.xlsx_RoiSetAuto-29.zip Distance px	40	3374.22	0.650021	355.508	9.49126	60.1778
	con_06m_m67_a3_002	con_06m_m67_a3_002.xlsx_RoiSetAuto-3.zip Distance px	20	4874.64	0.453593	355.508	13.7118	60.1778
	con_06m_m67_a3_002	con_06m_m67_a3_002.xlsx_RoiSetAuto-30.zip Distance px	3	2544.19	0.207072	355.508	7.1565	60.1778
	con_06m_m67_a3_002	con_06m_m67_a3_002.xlsx_RoiSetAuto-32.zip Distance px	3	2744.8	0.108073	355.508	7.72078	60.1778
	con_06m_m67_a3_002	con_06m_m67_a3_002.xlsx_RoiSetAuto-33.zip Distance px	3	2673.48	0.330402	355.508	7.52017	60.1778
	con_06m_m67_a3_002	con_06m_m67_a3_002.xlsx_RoiSetAuto-35.zip Distance px	20	2843.09	0.82032	355.508	7.99726	60.1778
	con_06m_m67_a3_002	con_06m_m67_a3_002.xlsx_RoiSetAuto-36.zip Distance px	13	2762.89	0.519789	355.508	7.77166	60.1778
	con_06m_m67_a3_002	con_06m_m67_a3_002.xlsx_RoiSetAuto-37.zip Distance px	5	3064.68	0.382939	355.508	8.62055	60.1778
	con_06m_m67_a3_002	con_06m_m67_a3_002.xlsx_RoiSetAuto-38.zip Distance px	6	2903.05	0.398032	355.508	8.16593	60.1778
	con_06m_m67_a3_002	con_06m_m67_a3_002.xlsx_RoiSetAuto-39.zip Distance px	3	2730.28	0.306619	355.508	7.67993	60.1778
	con_06m_m67_a3_002	con_06m_m67_a3_002.xlsx_RoiSetAuto-4.zip Distance px	49	3760.36	0.887172	355.508	10.5774	60.1778
	con_06m_m67_a3_002	con_06m_m67_a3_002.xlsx_RoiSetAuto-41.zip Distance px	10	3795.3	0.536446	355.508	10.6757	60.1778
	con_06m_m67_a3_002	con_06m_m67_a3_002.xlsx_RoiSetAuto-44.zip Distance px	7	2808.32	0.584875	355.508	7.89945	60.1778
	con_06m_m67_a3_002	con_06m_m67_a3_002.xlsx_RoiSetAuto-45.zip Distance px	121	4786.35	0.929047	355.508	13.4634	60.1778
	con_06m_m67_a3_002	con_06m_m67_a3_002.xlsx_RoiSetAuto-47.zip Distance px	150	5640.18	1.23188	355.508	15.8651	60.1778
	con_06m_m67_a3_002	con_06m_m67_a3_002.xlsx_RoiSetAuto-48.zip Distance px	13	5012.18	0.689027	355.508	14.0986	60.1778
	con_06m_m67_a3_002	con_06m_m67_a3_002.xlsx_RoiSetAuto-49.zip Distance px	5	2562.16	0.404269	355.508	7.20702	60.1778
	con_06m_m67_a3_002	con_06m_m67_a3_002.xlsx_RoiSetAuto-5.zip Distance px	70	4170.32	1.00222	355.508	11.7306	60.1778
	con_06m_m67_a3_002	con_06m_m67_a3_002.xlsx_RoiSetAuto-50.zip Distance px	13	3811.68	0.448517	355.508	10.7218	60.1778
	con_06m_m67_a3_002	con_06m_m67_a3_002.xlsx_RoiSetAuto-51.zip Distance px	4	3251.85	0.53476	355.508	9.14704	60.1778
	con_06m_m67_a3_002	con_06m_m67_a3_002.xlsx_RoiSetAuto-52.zip Distance px	6	3032.33	0.365055	355.508	8.52957	60.1778
	con_06m_m67_a3_002	con_06m_m67_a3_002.xlsx_RoiSetAuto-53.zip Distance px	16	3750.05	0.541627	355.508	10.5484	60.1778
	con_06m_m67_a3_002	con_06m_m67_a3_002.xlsx_RoiSetAuto-55.zip Distance px	34	4348.37	0.874641	355.508	12.2314	60.1778
	con_06m_m67_a3_002	con_06m_m67_a3_002.xlsx_RoiSetAuto-57.zip Distance px	4	3230.34	0.378399	355.508	9.08654	60.1778
	con_06m_m67_a3_002	con_06m_m67_a3_002.xlsx_RoiSetAuto-58.zip Distance px	30	5323.36	0.637474	355.508	14.9739	60.1778
	con_06m_m67_a3_002	con_06m_m67_a3_002.xlsx_RoiSetAuto-59.zip Distance px	6	3485.21	0.471871	355.508	9.80346	60.1778
	con_06m_m67_a3_002	con_06m_m67_a3_002.xlsx_RoiSetAuto-6.zip Distance px	38	5917.8	0.557556	355.508	16.646	60.1778
	con_06m_m67_a3_002	con_06m_m67_a3_002.xlsx_RoiSetAuto-61.zip Distance px	36	5254.54	0.764666	355.508	14.7804	60.1778
	con_06m_m67_a3_002	con_06m_m67_a3_002.xlsx_RoiSetAuto-62.zip Distance px	3	3024.65	0.141662	355.508	8.50797	60.1778
	con_06m_m67_a3_002	con_06m_m67_a3_002.xlsx_RoiSetAuto-63.zip Distance px	3	2870.32	0.378094	355.508	8.07384	60.1778
	con_06m_m67_a3_002	con_06m_m67_a3_002.xlsx_RoiSetAuto-64.zip Distance px	5	2941.46	0.393893	355.508	8.27397	60.1778
	con_06m_m67_a3_002	con_06m_m67_a3_002.xlsx_RoiSetAuto-65.zip Distance px	14	3749.76	0.506903	355.508	10.5476	60.1778
	con_06m_m67_a3_002	con_06m_m67_a3_002.xlsx_RoiSetAuto-66.zip Distance px	10	3259.44	0.4951	355.508	9.16841	60.1778
	con_06m_m67_a3_002	con_06m_m67_a3_002.xlsx_RoiSetAuto-69.zip Distance px	6	3450.64	0.573587	355.508	9.70621	60.1778
	con_06m_m67_a3_002	con_06m_m67_a3_002.xlsx_RoiSetAuto-7.zip Distance px	20	3045.51	0.691025	355.508	8.56665	60.1778
	con_06m_m67_a3_002	con_06m_m67_a3_002.xlsx_RoiSetAuto-70.zip Distance px	16	3118.16	0.863597	355.508	8.77098	60.1778
	con_06m_m67_a3_002	con_06m_m67_a3_002.xlsx_RoiSetAuto-71.zip Distance px	8	2983.46	0.381613	355.508	8.39211	60.1778
	con_06m_m67_a3_002	con_06m_m67_a3_002.xlsx_RoiSetAuto-73.zip Distance px	65	4666.51	1.09989	355.508	13.1263	60.1778
	con_06m_m67_a3_002	con_06m_m67_a3_002.xlsx_RoiSetAuto-74.zip Distance px	3	3073.06	0.271337	355.508	8.64414	60.1778
	con_06m_m67_a3_002	con_06m_m67_a3_002.xlsx_RoiSetAuto-75.zip Distance px	13	3365.39	0.596212	355.508	9.46644	60.1778
	con_06m_m67_a3_002	con_06m_m67_a3_002.xlsx_RoiSetAuto-76.zip Distance px	3	2659.99	0.092658	355.508	7.48222	60.1778
	con_06m_m67_a3_002	con_06m_m67_a3_002.xlsx_RoiSetAuto-77.zip Distance px	3	3670.74	0.308069	355.508	10.3253	60.1778
	con_06m_m67_a3_002	con_06m_m67_a3_002.xlsx_RoiSetAuto-78.zip Distance px	13	4430.84	0.549051	355.508	12.4634	60.1778
	con_06m_m67_a3_002	con_06m_m67_a3_002.xlsx_RoiSetAuto-80.zip Distance px	14	3445.11	0.665533	355.508	9.69067	60.1778
	con_06m_m67_a3_002	con_06m_m67_a3_002.xlsx_RoiSetAuto-81.zip Distance px	9	3604.1	0.534101	355.508	10.1379	60.1778
	con_06m_m67_a3_002	con_06m_m67_a3_002.xlsx_RoiSetAuto-82.zip Distance px	24	4843.96	0.810424	355.508	13.6255	60.1778
	con_06m_m67_a3_002	con_06m_m67_a3_002.xlsx_RoiSetAuto-83.zip Distance px	3	3682.55	0.219796	355.508	10.3585	60.1778
	con_06m_m67_a3_002	con_06m_m67_a3_002.xlsx_RoiSetAuto-84.zip Distance px	9	3643.84	0.644507	355.508	10.2497	60.1778
	con_06m_m67_a3_002	con_06m_m67_a3_002.xlsx_RoiSetAuto-87.zip Distance px	12	3995.81	0.722735	355.508	11.2397	60.1778
	con_06m_m67_a3_002	con_06m_m67_a3_002.xlsx_RoiSetAuto-88.zip Distance px	3	2761.3	0.22956	355.508	7.76719	60.1778
	con_06m_m67_a3_002	con_06m_m67_a3_002.xlsx_RoiSetAuto-89.zip Distance px	18	3953.11	0.716661	355.508	11.1196	60.1778
	con_06m_m67_a3_002	con_06m_m67_a3_002.xlsx_RoiSetAuto-9.zip Distance px	43	5325.03	1.17216	355.508	14.9787	60.1778
	con_06m_m67_a3_002	con_06m_m67_a3_002.xlsx_RoiSetAuto-90.zip Distance px	34	3980.71	0.738564	355.508	11.1972	60.1778
	con_06m_m67_a3_002	con_06m_m67_a3_002.xlsx_RoiSetAuto-91.zip Distance px	11	3703.33	0.690204	355.508	10.417	60.1778
	con_06m_m67_a3_002	con_06m_m67_a3_002.xlsx_RoiSetAuto-92.zip Distance px	4	3583.73	0.489894	355.508	10.0806	60.1778
	con_06m_m67_a3_002	con_06m_m67_a3_002.xlsx_RoiSetAuto-93.zip Distance px	4	2909.02	0.330785	355.508	8.1827	60.1778
	con_06m_m67_a3_002	con_06m_m67_a3_002.xlsx_RoiSetAuto-94.zip Distance px	14	3610.46	1.11825	355.508	10.1558	60.1778
	con_06m_m67_a3_002	con_06m_m67_a3_002.xlsx_RoiSetAuto-95.zip Distance px	3	2971.07	0.043468	355.508	8.35725	60.1778
	con_06m_m67_a3_002	con_06m_m67_a3_002.xlsx_RoiSetAuto-96.zip Distance px	56	10176.6	0.992219	355.508	28.6256	60.1778
	con_06m_m67_a3_002	con_06m_m67_a3_002.xlsx_RoiSetAuto-98.zip Distance px	32	6448.85	0.97652	355.508	18.1398	60.1778
	con_06m_m67_a3_002	con_06m_m67_a3_002.xlsx_RoiSetAuto-99.zip Distance px	44	5637.62	0.958357	355.508	15.8579	60.1778
	con_07m_m67_a3_001	con_07m_m67_a3_001.xlsx_RoiSetAuto-1.zip Distance px	65	5748.51	0.60056	484.059	11.8756	42.8267
	con_07m_m67_a3_001	con_07m_m67_a3_001.xlsx_RoiSetAuto-10.zip Distance px	21	7078.14	0.747367	484.059	14.6225	42.8267
	con_07m_m67_a3_001	con_07m_m67_a3_001.xlsx_RoiSetAuto-11.zip Distance px	3	3681.55	0.345563	484.059	7.60559	42.8267
	con_07m_m67_a3_001	con_07m_m67_a3_001.xlsx_RoiSetAuto-12.zip Distance px	4	3525.81	0.25942	484.059	7.28384	42.8267
	con_07m_m67_a3_001	con_07m_m67_a3_001.xlsx_RoiSetAuto-13.zip Distance px	16	5796.75	0.851013	484.059	11.9753	42.8267
	con_07m_m67_a3_001	con_07m_m67_a3_001.xlsx_RoiSetAuto-14.zip Distance px	10	3900.09	0.347757	484.059	8.05706	42.8267
	con_07m_m67_a3_001	con_07m_m67_a3_001.xlsx_RoiSetAuto-15.zip Distance px	36	5046.74	0.755298	484.059	10.4259	42.8267
	con_07m_m67_a3_001	con_07m_m67_a3_001.xlsx_RoiSetAuto-16.zip Distance px	5	4123.46	0.14756	484.059	8.5185	42.8267
	con_07m_m67_a3_001	con_07m_m67_a3_001.xlsx_RoiSetAuto-17.zip Distance px	16	5880.43	0.746959	484.059	12.1482	42.8267
	con_07m_m67_a3_001	con_07m_m67_a3_001.xlsx_RoiSetAuto-18.zip Distance px	3	3571.67	0.210795	484.059	7.37858	42.8267
	con_07m_m67_a3_001	con_07m_m67_a3_001.xlsx_RoiSetAuto-19.zip Distance px	96	6692.44	1.19657	484.059	13.8257	42.8267
	con_07m_m67_a3_001	con_07m_m67_a3_001.xlsx_RoiSetAuto-2.zip Distance px	3	3936.16	0.267504	484.059	8.13156	42.8267
	con_07m_m67_a3_001	con_07m_m67_a3_001.xlsx_RoiSetAuto-20.zip Distance px	3	3149.15	0.043233	484.059	6.50572	42.8267
	con_07m_m67_a3_001	con_07m_m67_a3_001.xlsx_RoiSetAuto-21.zip Distance px	10	7305.56	0.239034	484.059	15.0923	42.8267
	con_07m_m67_a3_001	con_07m_m67_a3_001.xlsx_RoiSetAuto-22.zip Distance px	65	7485.19	1.20914	484.059	15.4634	42.8267
	con_07m_m67_a3_001	con_07m_m67_a3_001.xlsx_RoiSetAuto-23.zip Distance px	5	4488.12	0.461522	484.059	9.27184	42.8267
	con_07m_m67_a3_001	con_07m_m67_a3_001.xlsx_RoiSetAuto-24.zip Distance px	52	6063.76	1.17067	484.059	12.5269	42.8267
	con_07m_m67_a3_001	con_07m_m67_a3_001.xlsx_RoiSetAuto-25.zip Distance px	35	5046.8	0.694944	484.059	10.426	42.8267
	con_07m_m67_a3_001	con_07m_m67_a3_001.xlsx_RoiSetAuto-27.zip Distance px	50	5747.12	1.39746	484.059	11.8728	42.8267
	con_07m_m67_a3_001	con_07m_m67_a3_001.xlsx_RoiSetAuto-28.zip Distance px	12	4419	0.60309	484.059	9.12905	42.8267
	con_07m_m67_a3_001	con_07m_m67_a3_001.xlsx_RoiSetAuto-29.zip Distance px	18	5488.19	0.708062	484.059	11.3378	42.8267
	con_07m_m67_a3_001	con_07m_m67_a3_001.xlsx_RoiSetAuto-3.zip Distance px	59	5827.06	1.0795	484.059	12.0379	42.8267
	con_07m_m67_a3_001	con_07m_m67_a3_001.xlsx_RoiSetAuto-30.zip Distance px	11	4955.08	0.551181	484.059	10.2365	42.8267
	con_07m_m67_a3_001	con_07m_m67_a3_001.xlsx_RoiSetAuto-31.zip Distance px	19	6312.75	1.24151	484.059	13.0413	42.8267
	con_07m_m67_a3_001	con_07m_m67_a3_001.xlsx_RoiSetAuto-32.zip Distance px	13	4757.26	0.694065	484.059	9.82785	42.8267
	con_07m_m67_a3_001	con_07m_m67_a3_001.xlsx_RoiSetAuto-33.zip Distance px	64	6604.56	0.707736	484.059	13.6441	42.8267
	con_07m_m67_a3_001	con_07m_m67_a3_001.xlsx_RoiSetAuto-34.zip Distance px	66	13092.9	1.34845	484.059	27.0482	42.8267
	con_07m_m67_a3_001	con_07m_m67_a3_001.xlsx_RoiSetAuto-35.zip Distance px	5	3982.3	0.319244	484.059	8.22689	42.8267
	con_07m_m67_a3_001	con_07m_m67_a3_001.xlsx_RoiSetAuto-36.zip Distance px	9	3998.79	0.480374	484.059	8.26095	42.8267
	con_07m_m67_a3_001	con_07m_m67_a3_001.xlsx_RoiSetAuto-37.zip Distance px	4	3720.22	0.355671	484.059	7.68547	42.8267
	con_07m_m67_a3_001	con_07m_m67_a3_001.xlsx_RoiSetAuto-38.zip Distance px	3	4251.54	0.217331	484.059	8.78309	42.8267
	con_07m_m67_a3_001	con_07m_m67_a3_001.xlsx_RoiSetAuto-39.zip Distance px	21	6521.62	0.8857	484.059	13.4728	42.8267
	con_07m_m67_a3_001	con_07m_m67_a3_001.xlsx_RoiSetAuto-4.zip Distance px	4	4486.13	0.348391	484.059	9.26774	42.8267
	con_07m_m67_a3_001	con_07m_m67_a3_001.xlsx_RoiSetAuto-40.zip Distance px	6	4941.58	0.600684	484.059	10.2086	42.8267
	con_07m_m67_a3_001	con_07m_m67_a3_001.xlsx_RoiSetAuto-41.zip Distance px	8	3695.96	0.358656	484.059	7.63535	42.8267
	con_07m_m67_a3_001	con_07m_m67_a3_001.xlsx_RoiSetAuto-42.zip Distance px	3	3649.38	0.26645	484.059	7.53911	42.8267
	con_07m_m67_a3_001	con_07m_m67_a3_001.xlsx_RoiSetAuto-43.zip Distance px	10	3900.26	0.435007	484.059	8.0574	42.8267
	con_07m_m67_a3_001	con_07m_m67_a3_001.xlsx_RoiSetAuto-44.zip Distance px	4	3550.28	0.290571	484.059	7.3344	42.8267
	con_07m_m67_a3_001	con_07m_m67_a3_001.xlsx_RoiSetAuto-45.zip Distance px	4	3804.18	0.314583	484.059	7.85891	42.8267
	con_07m_m67_a3_001	con_07m_m67_a3_001.xlsx_RoiSetAuto-46.zip Distance px	4	3717.79	0.136337	484.059	7.68045	42.8267
	con_07m_m67_a3_001	con_07m_m67_a3_001.xlsx_RoiSetAuto-47.zip Distance px	6	4514.12	0.348805	484.059	9.32555	42.8267
	con_07m_m67_a3_001	con_07m_m67_a3_001.xlsx_RoiSetAuto-48.zip Distance px	29	4269.5	0.778832	484.059	8.8202	42.8267
	con_07m_m67_a3_001	con_07m_m67_a3_001.xlsx_RoiSetAuto-49.zip Distance px	12	4414.43	0.524679	484.059	9.11962	42.8267
	con_07m_m67_a3_001	con_07m_m67_a3_001.xlsx_RoiSetAuto-5.zip Distance px	60	8205.82	1.8922	484.059	16.9521	42.8267
	con_07m_m67_a3_001	con_07m_m67_a3_001.xlsx_RoiSetAuto-50.zip Distance px	4	3973.47	0.15517	484.059	8.20865	42.8267
	con_07m_m67_a3_001	con_07m_m67_a3_001.xlsx_RoiSetAuto-51.zip Distance px	18	4984.03	0.951822	484.059	10.2963	42.8267
	con_07m_m67_a3_001	con_07m_m67_a3_001.xlsx_RoiSetAuto-52.zip Distance px	26	5927.59	0.874123	484.059	12.2456	42.8267
	con_07m_m67_a3_001	con_07m_m67_a3_001.xlsx_RoiSetAuto-53.zip Distance px	5	3998.04	0.301417	484.059	8.2594	42.8267
	con_07m_m67_a3_001	con_07m_m67_a3_001.xlsx_RoiSetAuto-54.zip Distance px	6	3906.93	0.381211	484.059	8.07119	42.8267
	con_07m_m67_a3_001	con_07m_m67_a3_001.xlsx_RoiSetAuto-55.zip Distance px	19	4977.23	0.880058	484.059	10.2823	42.8267
	con_07m_m67_a3_001	con_07m_m67_a3_001.xlsx_RoiSetAuto-56.zip Distance px	5	3948.84	0.336601	484.059	8.15776	42.8267
	con_07m_m67_a3_001	con_07m_m67_a3_001.xlsx_RoiSetAuto-57.zip Distance px	3	4027.47	0.241046	484.059	8.3202	42.8267
	con_07m_m67_a3_001	con_07m_m67_a3_001.xlsx_RoiSetAuto-6.zip Distance px	13	4181.79	0.399031	484.059	8.63901	42.8267
	con_07m_m67_a3_001	con_07m_m67_a3_001.xlsx_RoiSetAuto-7.zip Distance px	210	18158.8	0.837009	484.059	37.5136	42.8267
	con_07m_m67_a3_001	con_07m_m67_a3_001.xlsx_RoiSetAuto-8.zip Distance px	80	6307.81	1.41683	484.059	13.0311	42.8267
	con_07m_m67_a3_001	con_07m_m67_a3_001.xlsx_RoiSetAuto-9.zip Distance px	5	7567.16	0.391306	484.059	15.6327	42.8267
	con_07m_m67_a3_002	con_07m_m67_a3_002.xlsx_RoiSetAuto-1.zip Distance px	68	3931.86	1.38146	303.528	12.9539	56.2844
	con_07m_m67_a3_002	con_07m_m67_a3_002.xlsx_RoiSetAuto-10.zip Distance px	14	3357.36	0.693136	303.528	11.0611	56.2844
	con_07m_m67_a3_002	con_07m_m67_a3_002.xlsx_RoiSetAuto-11.zip Distance px	59	4385.27	1.05595	303.528	14.4477	56.2844
	con_07m_m67_a3_002	con_07m_m67_a3_002.xlsx_RoiSetAuto-12.zip Distance px	9	2458.95	0.640725	303.528	8.10122	56.2844
	con_07m_m67_a3_002	con_07m_m67_a3_002.xlsx_RoiSetAuto-13.zip Distance px	10	2382.18	0.622741	303.528	7.84832	56.2844
	con_07m_m67_a3_002	con_07m_m67_a3_002.xlsx_RoiSetAuto-14.zip Distance px	4	1936.08	0.561172	303.528	6.37858	56.2844
	con_07m_m67_a3_002	con_07m_m67_a3_002.xlsx_RoiSetAuto-15.zip Distance px	28	2970.17	1.21517	303.528	9.7855	56.2844
	con_07m_m67_a3_002	con_07m_m67_a3_002.xlsx_RoiSetAuto-16.zip Distance px	15	3073.99	0.67457	303.528	10.1275	56.2844
	con_07m_m67_a3_002	con_07m_m67_a3_002.xlsx_RoiSetAuto-17.zip Distance px	10	5980.87	0.446447	303.528	19.7045	56.2844
	con_07m_m67_a3_002	con_07m_m67_a3_002.xlsx_RoiSetAuto-19.zip Distance px	18	2616.34	0.600614	303.528	8.61977	56.2844
	con_07m_m67_a3_002	con_07m_m67_a3_002.xlsx_RoiSetAuto-2.zip Distance px	28	4895.51	1.28378	303.528	16.1287	56.2844
	con_07m_m67_a3_002	con_07m_m67_a3_002.xlsx_RoiSetAuto-20.zip Distance px	3	2963.74	0.856932	303.528	9.7643	56.2844
	con_07m_m67_a3_002	con_07m_m67_a3_002.xlsx_RoiSetAuto-21.zip Distance px	8	2637.25	0.785216	303.528	8.68865	56.2844
	con_07m_m67_a3_002	con_07m_m67_a3_002.xlsx_RoiSetAuto-22.zip Distance px	3	2335.65	0.410241	303.528	7.69501	56.2844
	con_07m_m67_a3_002	con_07m_m67_a3_002.xlsx_RoiSetAuto-23.zip Distance px	3	2519.12	0.233885	303.528	8.29946	56.2844
	con_07m_m67_a3_002	con_07m_m67_a3_002.xlsx_RoiSetAuto-24.zip Distance px	16	5005.44	1.07167	303.528	16.4909	56.2844
	con_07m_m67_a3_002	con_07m_m67_a3_002.xlsx_RoiSetAuto-25.zip Distance px	49	4530.57	1.44314	303.528	14.9264	56.2844
	con_07m_m67_a3_002	con_07m_m67_a3_002.xlsx_RoiSetAuto-26.zip Distance px	17	2931.72	1.0992	303.528	9.65881	56.2844
	con_07m_m67_a3_002	con_07m_m67_a3_002.xlsx_RoiSetAuto-27.zip Distance px	28	2761.33	1.04126	303.528	9.09745	56.2844
	con_07m_m67_a3_002	con_07m_m67_a3_002.xlsx_RoiSetAuto-28.zip Distance px	12	2667	0.914899	303.528	8.78666	56.2844
	con_07m_m67_a3_002	con_07m_m67_a3_002.xlsx_RoiSetAuto-29.zip Distance px	22	2337.35	1.13966	303.528	7.70063	56.2844
	con_07m_m67_a3_002	con_07m_m67_a3_002.xlsx_RoiSetAuto-3.zip Distance px	120	5350.89	1.63203	303.528	17.629	56.2844
	con_07m_m67_a3_002	con_07m_m67_a3_002.xlsx_RoiSetAuto-30.zip Distance px	10	2919.8	0.783175	303.528	9.61956	56.2844
	con_07m_m67_a3_002	con_07m_m67_a3_002.xlsx_RoiSetAuto-31.zip Distance px	8	2393.9	0.888153	303.528	7.88691	56.2844
	con_07m_m67_a3_002	con_07m_m67_a3_002.xlsx_RoiSetAuto-33.zip Distance px	47	4937.72	1.08019	303.528	16.2678	56.2844
	con_07m_m67_a3_002	con_07m_m67_a3_002.xlsx_RoiSetAuto-35.zip Distance px	7	2251.89	0.922811	303.528	7.41907	56.2844
	con_07m_m67_a3_002	con_07m_m67_a3_002.xlsx_RoiSetAuto-36.zip Distance px	29	2985.66	1.51871	303.528	9.83652	56.2844
	con_07m_m67_a3_002	con_07m_m67_a3_002.xlsx_RoiSetAuto-37.zip Distance px	21	6856.86	1.29134	303.528	22.5905	56.2844
	con_07m_m67_a3_002	con_07m_m67_a3_002.xlsx_RoiSetAuto-38.zip Distance px	7	3644.23	0.514925	303.528	12.0063	56.2844
	con_07m_m67_a3_002	con_07m_m67_a3_002.xlsx_RoiSetAuto-39.zip Distance px	6	2563.36	0.982597	303.528	8.44522	56.2844
	con_07m_m67_a3_002	con_07m_m67_a3_002.xlsx_RoiSetAuto-4.zip Distance px	8	3682.8	0.964416	303.528	12.1333	56.2844
	con_07m_m67_a3_002	con_07m_m67_a3_002.xlsx_RoiSetAuto-41.zip Distance px	6	2676.29	0.235623	303.528	8.81727	56.2844
	con_07m_m67_a3_002	con_07m_m67_a3_002.xlsx_RoiSetAuto-42.zip Distance px	61	3951.26	1.04318	303.528	13.0178	56.2844
	con_07m_m67_a3_002	con_07m_m67_a3_002.xlsx_RoiSetAuto-43.zip Distance px	6	5919.83	0.388713	303.528	19.5034	56.2844
	con_07m_m67_a3_002	con_07m_m67_a3_002.xlsx_RoiSetAuto-44.zip Distance px	4	2039.36	0.2495	303.528	6.71885	56.2844
	con_07m_m67_a3_002	con_07m_m67_a3_002.xlsx_RoiSetAuto-45.zip Distance px	8	9215.93	0.468691	303.528	30.3627	56.2844
	con_07m_m67_a3_002	con_07m_m67_a3_002.xlsx_RoiSetAuto-47.zip Distance px	6	3243.08	1.0399	303.528	10.6846	56.2844
	con_07m_m67_a3_002	con_07m_m67_a3_002.xlsx_RoiSetAuto-49.zip Distance px	26	5332.38	0.977427	303.528	17.568	56.2844
	con_07m_m67_a3_002	con_07m_m67_a3_002.xlsx_RoiSetAuto-5.zip Distance px	82	3736.3	0.919681	303.528	12.3096	56.2844
	con_07m_m67_a3_002	con_07m_m67_a3_002.xlsx_RoiSetAuto-50.zip Distance px	10	2325.79	1.22354	303.528	7.66253	56.2844
	con_07m_m67_a3_002	con_07m_m67_a3_002.xlsx_RoiSetAuto-52.zip Distance px	49	4395.14	1.7168	303.528	14.4802	56.2844
	con_07m_m67_a3_002	con_07m_m67_a3_002.xlsx_RoiSetAuto-53.zip Distance px	26	5136.65	1.27051	303.528	16.9232	56.2844
	con_07m_m67_a3_002	con_07m_m67_a3_002.xlsx_RoiSetAuto-54.zip Distance px	8	2939.2	0.8676	303.528	9.68346	56.2844
	con_07m_m67_a3_002	con_07m_m67_a3_002.xlsx_RoiSetAuto-55.zip Distance px	4	3222.4	0.283692	303.528	10.6165	56.2844
	con_07m_m67_a3_002	con_07m_m67_a3_002.xlsx_RoiSetAuto-56.zip Distance px	8	2599.69	0.665381	303.528	8.56493	56.2844
	con_07m_m67_a3_002	con_07m_m67_a3_002.xlsx_RoiSetAuto-57.zip Distance px	7	2096.04	1.00267	303.528	6.90558	56.2844
	con_07m_m67_a3_002	con_07m_m67_a3_002.xlsx_RoiSetAuto-58.zip Distance px	53	8665.02	1.18603	303.528	28.5477	56.2844
	con_07m_m67_a3_002	con_07m_m67_a3_002.xlsx_RoiSetAuto-59.zip Distance px	50	4717.72	1.44569	303.528	15.5429	56.2844
	con_07m_m67_a3_002	con_07m_m67_a3_002.xlsx_RoiSetAuto-6.zip Distance px	68	6900.01	1.40304	303.528	22.7327	56.2844
	con_07m_m67_a3_002	con_07m_m67_a3_002.xlsx_RoiSetAuto-61.zip Distance px	4	2076.11	1.21274	303.528	6.83995	56.2844
	con_07m_m67_a3_002	con_07m_m67_a3_002.xlsx_RoiSetAuto-62.zip Distance px	8	2267.43	0.634378	303.528	7.47026	56.2844
	con_07m_m67_a3_002	con_07m_m67_a3_002.xlsx_RoiSetAuto-63.zip Distance px	4	2549.9	0.526991	303.528	8.40089	56.2844
	con_07m_m67_a3_002	con_07m_m67_a3_002.xlsx_RoiSetAuto-64.zip Distance px	4	2684.52	0.295467	303.528	8.8444	56.2844
	con_07m_m67_a3_002	con_07m_m67_a3_002.xlsx_RoiSetAuto-65.zip Distance px	9	2346.56	0.649377	303.528	7.73094	56.2844
	con_07m_m67_a3_002	con_07m_m67_a3_002.xlsx_RoiSetAuto-66.zip Distance px	6	2768.86	0.506016	303.528	9.12226	56.2844
	con_07m_m67_a3_002	con_07m_m67_a3_002.xlsx_RoiSetAuto-67.zip Distance px	3	2368.38	0.754774	303.528	7.80283	56.2844
	con_07m_m67_a3_002	con_07m_m67_a3_002.xlsx_RoiSetAuto-68.zip Distance px	14	3085.54	1.2	303.528	10.1656	56.2844
	con_07m_m67_a3_002	con_07m_m67_a3_002.xlsx_RoiSetAuto-69.zip Distance px	6	2676.32	1.04842	303.528	8.81738	56.2844
	con_07m_m67_a3_002	con_07m_m67_a3_002.xlsx_RoiSetAuto-7.zip Distance px	13	3465.84	0.900154	303.528	11.4185	56.2844
	con_07m_m67_a3_002	con_07m_m67_a3_002.xlsx_RoiSetAuto-70.zip Distance px	3	2266.01	0.848853	303.528	7.46557	56.2844
	con_07m_m67_a3_002	con_07m_m67_a3_002.xlsx_RoiSetAuto-71.zip Distance px	5	2700.9	0.587584	303.528	8.89837	56.2844
	con_07m_m67_a3_002	con_07m_m67_a3_002.xlsx_RoiSetAuto-72.zip Distance px	9	2820.03	0.707159	303.528	9.29085	56.2844
	con_07m_m67_a3_002	con_07m_m67_a3_002.xlsx_RoiSetAuto-74.zip Distance px	9	2124.54	1.6317	303.528	6.99948	56.2844
	con_07m_m67_a3_002	con_07m_m67_a3_002.xlsx_RoiSetAuto-75.zip Distance px	9	2973.03	0.650215	303.528	9.79493	56.2844
	con_07m_m67_a3_002	con_07m_m67_a3_002.xlsx_RoiSetAuto-76.zip Distance px	3	2577.12	0.834364	303.528	8.49055	56.2844
	con_07m_m67_a3_002	con_07m_m67_a3_002.xlsx_RoiSetAuto-77.zip Distance px	4	3293.9	0.516555	303.528	10.8521	56.2844
	con_07m_m67_a3_002	con_07m_m67_a3_002.xlsx_RoiSetAuto-8.zip Distance px	13	2617.39	0.492996	303.528	8.62322	56.2844
	con_07m_m67_a3_002	con_07m_m67_a3_002.xlsx_RoiSetAuto-9.zip Distance px	3	1844.77	0.220644	303.528	6.07775	56.2844
	con_07m_m67_a3_003	con_07m_m67_a3_003.xlsx_RoiSetAuto-1.zip Distance px	86	3492.6	0.823371	227.988	15.3192	45.7244
	con_07m_m67_a3_003	con_07m_m67_a3_003.xlsx_RoiSetAuto-10.zip Distance px	7	1918.67	0.502727	227.988	8.41567	45.7244
	con_07m_m67_a3_003	con_07m_m67_a3_003.xlsx_RoiSetAuto-11.zip Distance px	23	2392.14	0.607278	227.988	10.4924	45.7244
	con_07m_m67_a3_003	con_07m_m67_a3_003.xlsx_RoiSetAuto-12.zip Distance px	29	2700.58	0.604621	227.988	11.8453	45.7244
	con_07m_m67_a3_003	con_07m_m67_a3_003.xlsx_RoiSetAuto-14.zip Distance px	57	2297.14	0.85699	227.988	10.0757	45.7244
	con_07m_m67_a3_003	con_07m_m67_a3_003.xlsx_RoiSetAuto-15.zip Distance px	5	1853.09	0.439023	227.988	8.128	45.7244
	con_07m_m67_a3_003	con_07m_m67_a3_003.xlsx_RoiSetAuto-16.zip Distance px	3	2150.14	0.21536	227.988	9.43091	45.7244
	con_07m_m67_a3_003	con_07m_m67_a3_003.xlsx_RoiSetAuto-18.zip Distance px	11	2088.34	0.533374	227.988	9.15986	45.7244
	con_07m_m67_a3_003	con_07m_m67_a3_003.xlsx_RoiSetAuto-2.zip Distance px	4	2418	0.442791	227.988	10.6058	45.7244
	con_07m_m67_a3_003	con_07m_m67_a3_003.xlsx_RoiSetAuto-20.zip Distance px	53	1933.17	0.70922	227.988	8.47926	45.7244
	con_07m_m67_a3_003	con_07m_m67_a3_003.xlsx_RoiSetAuto-21.zip Distance px	21	2056.35	0.575825	227.988	9.01954	45.7244
	con_07m_m67_a3_003	con_07m_m67_a3_003.xlsx_RoiSetAuto-22.zip Distance px	33	2631.13	0.631542	227.988	11.5406	45.7244
	con_07m_m67_a3_003	con_07m_m67_a3_003.xlsx_RoiSetAuto-23.zip Distance px	3	2089.12	0.529631	227.988	9.16327	45.7244
	con_07m_m67_a3_003	con_07m_m67_a3_003.xlsx_RoiSetAuto-25.zip Distance px	32	2265.17	0.862529	227.988	9.93547	45.7244
	con_07m_m67_a3_003	con_07m_m67_a3_003.xlsx_RoiSetAuto-26.zip Distance px	37	2349.22	0.709114	227.988	10.3041	45.7244
	con_07m_m67_a3_003	con_07m_m67_a3_003.xlsx_RoiSetAuto-27.zip Distance px	38	2964.56	0.794488	227.988	13.0031	45.7244
	con_07m_m67_a3_003	con_07m_m67_a3_003.xlsx_RoiSetAuto-3.zip Distance px	197	5187.61	0.681475	227.988	22.7538	45.7244
	con_07m_m67_a3_003	con_07m_m67_a3_003.xlsx_RoiSetAuto-30.zip Distance px	5	1791.34	0.578866	227.988	7.85716	45.7244
	con_07m_m67_a3_003	con_07m_m67_a3_003.xlsx_RoiSetAuto-31.zip Distance px	3	1705.13	0.205085	227.988	7.47904	45.7244
	con_07m_m67_a3_003	con_07m_m67_a3_003.xlsx_RoiSetAuto-32.zip Distance px	3	2117.26	0.498887	227.988	9.28669	45.7244
	con_07m_m67_a3_003	con_07m_m67_a3_003.xlsx_RoiSetAuto-34.zip Distance px	57	3371.97	1.15589	227.988	14.7901	45.7244
	con_07m_m67_a3_003	con_07m_m67_a3_003.xlsx_RoiSetAuto-36.zip Distance px	3	2029.76	0.316164	227.988	8.90293	45.7244
	con_07m_m67_a3_003	con_07m_m67_a3_003.xlsx_RoiSetAuto-38.zip Distance px	25	2622.72	0.753106	227.988	11.5037	45.7244
	con_07m_m67_a3_003	con_07m_m67_a3_003.xlsx_RoiSetAuto-39.zip Distance px	3	1617.5	0.185843	227.988	7.09465	45.7244
	con_07m_m67_a3_003	con_07m_m67_a3_003.xlsx_RoiSetAuto-4.zip Distance px	91	2801.75	0.94484	227.988	12.289	45.7244
	con_07m_m67_a3_003	con_07m_m67_a3_003.xlsx_RoiSetAuto-41.zip Distance px	35	2624.35	0.875222	227.988	11.5109	45.7244
	con_07m_m67_a3_003	con_07m_m67_a3_003.xlsx_RoiSetAuto-43.zip Distance px	8	2281.05	0.839898	227.988	10.0051	45.7244
	con_07m_m67_a3_003	con_07m_m67_a3_003.xlsx_RoiSetAuto-44.zip Distance px	3	1838.63	0.421694	227.988	8.06457	45.7244
	con_07m_m67_a3_003	con_07m_m67_a3_003.xlsx_RoiSetAuto-45.zip Distance px	21	2278.05	0.856226	227.988	9.99196	45.7244
	con_07m_m67_a3_003	con_07m_m67_a3_003.xlsx_RoiSetAuto-51.zip Distance px	3	1862.37	0.346851	227.988	8.16869	45.7244
	con_07m_m67_a3_003	con_07m_m67_a3_003.xlsx_RoiSetAuto-52.zip Distance px	7	2150.25	0.542716	227.988	9.43141	45.7244
	con_07m_m67_a3_003	con_07m_m67_a3_003.xlsx_RoiSetAuto-54.zip Distance px	28	2484.68	0.621119	227.988	10.8983	45.7244
	con_07m_m67_a3_003	con_07m_m67_a3_003.xlsx_RoiSetAuto-56.zip Distance px	3	1652.21	0.375995	227.988	7.2469	45.7244
	con_07m_m67_a3_003	con_07m_m67_a3_003.xlsx_RoiSetAuto-57.zip Distance px	3	1826.79	0.281026	227.988	8.01264	45.7244
	con_07m_m67_a3_003	con_07m_m67_a3_003.xlsx_RoiSetAuto-59.zip Distance px	3	2062.02	0.234721	227.988	9.0444	45.7244
	con_07m_m67_a3_003	con_07m_m67_a3_003.xlsx_RoiSetAuto-6.zip Distance px	9	3329.65	0.709094	227.988	14.6045	45.7244
	con_07m_m67_a3_003	con_07m_m67_a3_003.xlsx_RoiSetAuto-60.zip Distance px	4	1935.66	0.581075	227.988	8.49018	45.7244
	con_07m_m67_a3_003	con_07m_m67_a3_003.xlsx_RoiSetAuto-61.zip Distance px	9	2012.12	0.754883	227.988	8.82555	45.7244
	con_07m_m67_a3_003	con_07m_m67_a3_003.xlsx_RoiSetAuto-62.zip Distance px	25	2263.45	0.864814	227.988	9.92791	45.7244
	con_07m_m67_a3_003	con_07m_m67_a3_003.xlsx_RoiSetAuto-63.zip Distance px	3	1976.25	0.449183	227.988	8.66823	45.7244
	con_07m_m67_a3_003	con_07m_m67_a3_003.xlsx_RoiSetAuto-67.zip Distance px	14	2116.06	0.532747	227.988	9.28142	45.7244
	con_07m_m67_a3_003	con_07m_m67_a3_003.xlsx_RoiSetAuto-68.zip Distance px	3	1744.53	0.385293	227.988	7.65183	45.7244
	con_07m_m67_a3_003	con_07m_m67_a3_003.xlsx_RoiSetAuto-69.zip Distance px	3	1718.05	0.276445	227.988	7.53568	45.7244
	con_07m_m67_a3_003	con_07m_m67_a3_003.xlsx_RoiSetAuto-70.zip Distance px	70	3841.25	1.28126	227.988	16.8485	45.7244
	con_07m_m67_a3_003	con_07m_m67_a3_003.xlsx_RoiSetAuto-71.zip Distance px	8	2029.79	0.67316	227.988	8.90306	45.7244
	con_07m_m67_a3_003	con_07m_m67_a3_003.xlsx_RoiSetAuto-72.zip Distance px	3	1854.38	0.394214	227.988	8.13367	45.7244
	con_07m_m67_a3_003	con_07m_m67_a3_003.xlsx_RoiSetAuto-73.zip Distance px	30	2918.84	0.723333	227.988	12.8026	45.7244
	con_07m_m67_a3_003	con_07m_m67_a3_003.xlsx_RoiSetAuto-74.zip Distance px	3	1792.48	0.106454	227.988	7.86218	45.7244
	con_07m_m67_a3_003	con_07m_m67_a3_003.xlsx_RoiSetAuto-77.zip Distance px	3	1710.45	0.161524	227.988	7.50236	45.7244
	con_07m_m67_a3_003	con_07m_m67_a3_003.xlsx_RoiSetAuto-78.zip Distance px	8	2390.17	0.524915	227.988	10.4837	45.7244
	con_07m_m67_a3_003	con_07m_m67_a3_003.xlsx_RoiSetAuto-79.zip Distance px	3	1901.02	0.464559	227.988	8.33822	45.7244
	con_07m_m67_a3_003	con_07m_m67_a3_003.xlsx_RoiSetAuto-8.zip Distance px	8	2143.59	0.676231	227.988	9.40221	45.7244
	con_07m_m67_a3_003	con_07m_m67_a3_003.xlsx_RoiSetAuto-80.zip Distance px	24	2232.81	0.704343	227.988	9.79354	45.7244
	con_07m_m67_a3_003	con_07m_m67_a3_003.xlsx_RoiSetAuto-81.zip Distance px	3	1998.36	0.267257	227.988	8.7652	45.7244
	con_07m_m67_a3_003	con_07m_m67_a3_003.xlsx_RoiSetAuto-82.zip Distance px	3	1613.46	0.27645	227.988	7.07695	45.7244
	con_07m_m67_a3_003	con_07m_m67_a3_003.xlsx_RoiSetAuto-83.zip Distance px	3	1613.08	0.486573	227.988	7.07528	45.7244
	con_07m_m67_a3_003	con_07m_m67_a3_003.xlsx_RoiSetAuto-85.zip Distance px	3	2331.84	0.889479	227.988	10.2279	45.7244
	con_07m_m67_a3_003	con_07m_m67_a3_003.xlsx_RoiSetAuto-86.zip Distance px	5	1985.45	0.69142	227.988	8.70858	45.7244
	con_07m_m67_a3_003	con_07m_m67_a3_003.xlsx_RoiSetAuto-87.zip Distance px	37	2078.32	1.03522	227.988	9.11592	45.7244
	con_07m_m67_a3_003	con_07m_m67_a3_003.xlsx_RoiSetAuto-89.zip Distance px	9	2897.31	0.705022	227.988	12.7082	45.7244
	con_07m_m67_a3_003	con_07m_m67_a3_003.xlsx_RoiSetAuto-9.zip Distance px	35	2703.11	0.738087	227.988	11.8563	45.7244
	con_07m_m67_a3_003	con_07m_m67_a3_003.xlsx_RoiSetAuto-91.zip Distance px	3	1777.05	0.201111	227.988	7.79447	45.7244
	con_07m_m67_a3_003	con_07m_m67_a3_003.xlsx_RoiSetAuto-93.zip Distance px	9	1989.23	0.717736	227.988	8.72512	45.7244
	con_07m_m67_a3_003	con_07m_m67_a3_003.xlsx_RoiSetAuto-94.zip Distance px	4	1793.61	0.172797	227.988	7.86713	45.7244
	con_07m_m67_a3_003	con_07m_m67_a3_003.xlsx_RoiSetAuto-95.zip Distance px	8	2334.16	0.908921	227.988	10.2381	45.7244
	con_07m_m67_a3_003	con_07m_m67_a3_003.xlsx_RoiSetAuto-96.zip Distance px	8	3954.38	0.518788	227.988	17.3446	45.7244
	con_07m_m67_a3_003	con_07m_m67_a3_003.xlsx_RoiSetAuto-98.zip Distance px	3	2081.62	0.461741	227.988	9.13038	45.7244
	con_08m_m67_a3_002	con_08m_m67_a3_002.xlsx_RoiSetAuto-1.zip Distance px	16	2908.62	0.781502	318.361	9.13622	89.6711
	con_08m_m67_a3_002	con_08m_m67_a3_002.xlsx_RoiSetAuto-10.zip Distance px	137	3653.66	1.15607	318.361	11.4765	89.6711
	con_08m_m67_a3_002	con_08m_m67_a3_002.xlsx_RoiSetAuto-101.zip Distance px	6	2303.16	0.592654	318.361	7.23443	89.6711
	con_08m_m67_a3_002	con_08m_m67_a3_002.xlsx_RoiSetAuto-103.zip Distance px	6	2536.87	0.183693	318.361	7.96852	89.6711
	con_08m_m67_a3_002	con_08m_m67_a3_002.xlsx_RoiSetAuto-104.zip Distance px	54	3529.12	0.969692	318.361	11.0853	89.6711
	con_08m_m67_a3_002	con_08m_m67_a3_002.xlsx_RoiSetAuto-105.zip Distance px	3	2617.36	0.39532	318.361	8.22136	89.6711
	con_08m_m67_a3_002	con_08m_m67_a3_002.xlsx_RoiSetAuto-106.zip Distance px	30	3939.88	1.12666	318.361	12.3755	89.6711
	con_08m_m67_a3_002	con_08m_m67_a3_002.xlsx_RoiSetAuto-107.zip Distance px	3	2375.76	0.775999	318.361	7.46247	89.6711
	con_08m_m67_a3_002	con_08m_m67_a3_002.xlsx_RoiSetAuto-108.zip Distance px	10	2427.4	0.636426	318.361	7.62468	89.6711
	con_08m_m67_a3_002	con_08m_m67_a3_002.xlsx_RoiSetAuto-109.zip Distance px	3	2338.5	0.269487	318.361	7.34544	89.6711
	con_08m_m67_a3_002	con_08m_m67_a3_002.xlsx_RoiSetAuto-110.zip Distance px	5	2260.64	0.331975	318.361	7.10085	89.6711
	con_08m_m67_a3_002	con_08m_m67_a3_002.xlsx_RoiSetAuto-112.zip Distance px	25	2480.49	0.871339	318.361	7.79143	89.6711
	con_08m_m67_a3_002	con_08m_m67_a3_002.xlsx_RoiSetAuto-115.zip Distance px	3	2179.11	0.11392	318.361	6.84478	89.6711
	con_08m_m67_a3_002	con_08m_m67_a3_002.xlsx_RoiSetAuto-116.zip Distance px	6	2257.61	0.552152	318.361	7.09135	89.6711
	con_08m_m67_a3_002	con_08m_m67_a3_002.xlsx_RoiSetAuto-117.zip Distance px	3	2239.05	0.691421	318.361	7.03306	89.6711
	con_08m_m67_a3_002	con_08m_m67_a3_002.xlsx_RoiSetAuto-118.zip Distance px	18	3110.11	0.368978	318.361	9.76914	89.6711
	con_08m_m67_a3_002	con_08m_m67_a3_002.xlsx_RoiSetAuto-119.zip Distance px	4	2486.76	0.412266	318.361	7.81111	89.6711
	con_08m_m67_a3_002	con_08m_m67_a3_002.xlsx_RoiSetAuto-12.zip Distance px	10	2919.36	0.72638	318.361	9.16995	89.6711
	con_08m_m67_a3_002	con_08m_m67_a3_002.xlsx_RoiSetAuto-120.zip Distance px	4	2314.77	0.640045	318.361	7.27089	89.6711
	con_08m_m67_a3_002	con_08m_m67_a3_002.xlsx_RoiSetAuto-122.zip Distance px	9	2521.62	0.67675	318.361	7.92063	89.6711
	con_08m_m67_a3_002	con_08m_m67_a3_002.xlsx_RoiSetAuto-123.zip Distance px	4	6715.16	0.168989	318.361	21.0929	89.6711
	con_08m_m67_a3_002	con_08m_m67_a3_002.xlsx_RoiSetAuto-124.zip Distance px	4	1936.73	0.186405	318.361	6.08345	89.6711
	con_08m_m67_a3_002	con_08m_m67_a3_002.xlsx_RoiSetAuto-125.zip Distance px	3	2232.26	0.458138	318.361	7.01171	89.6711
	con_08m_m67_a3_002	con_08m_m67_a3_002.xlsx_RoiSetAuto-126.zip Distance px	7	2464.68	0.449122	318.361	7.74178	89.6711
	con_08m_m67_a3_002	con_08m_m67_a3_002.xlsx_RoiSetAuto-127.zip Distance px	22	3990.31	1.05532	318.361	12.5339	89.6711
	con_08m_m67_a3_002	con_08m_m67_a3_002.xlsx_RoiSetAuto-128.zip Distance px	5	2280.73	0.258811	318.361	7.16396	89.6711
	con_08m_m67_a3_002	con_08m_m67_a3_002.xlsx_RoiSetAuto-129.zip Distance px	16	2556.37	0.659051	318.361	8.02977	89.6711
	con_08m_m67_a3_002	con_08m_m67_a3_002.xlsx_RoiSetAuto-13.zip Distance px	8	2557.84	0.554737	318.361	8.03441	89.6711
	con_08m_m67_a3_002	con_08m_m67_a3_002.xlsx_RoiSetAuto-131.zip Distance px	21	2939.67	0.884268	318.361	9.23375	89.6711
	con_08m_m67_a3_002	con_08m_m67_a3_002.xlsx_RoiSetAuto-132.zip Distance px	5	2574.18	0.800993	318.361	8.08572	89.6711
	con_08m_m67_a3_002	con_08m_m67_a3_002.xlsx_RoiSetAuto-133.zip Distance px	23	3375.4	0.802473	318.361	10.6024	89.6711
	con_08m_m67_a3_002	con_08m_m67_a3_002.xlsx_RoiSetAuto-135.zip Distance px	3	2027.65	0.379498	318.361	6.36902	89.6711
	con_08m_m67_a3_002	con_08m_m67_a3_002.xlsx_RoiSetAuto-136.zip Distance px	5	2070.59	0.383659	318.361	6.5039	89.6711
	con_08m_m67_a3_002	con_08m_m67_a3_002.xlsx_RoiSetAuto-137.zip Distance px	4	2506.12	0.311798	318.361	7.87194	89.6711
	con_08m_m67_a3_002	con_08m_m67_a3_002.xlsx_RoiSetAuto-138.zip Distance px	6	3130.53	0.512537	318.361	9.83326	89.6711
	con_08m_m67_a3_002	con_08m_m67_a3_002.xlsx_RoiSetAuto-141.zip Distance px	9	2717.9	0.64858	318.361	8.53715	89.6711
	con_08m_m67_a3_002	con_08m_m67_a3_002.xlsx_RoiSetAuto-142.zip Distance px	3	1988.48	0.287677	318.361	6.24599	89.6711
	con_08m_m67_a3_002	con_08m_m67_a3_002.xlsx_RoiSetAuto-143.zip Distance px	7	3986.64	0.304688	318.361	12.5224	89.6711
	con_08m_m67_a3_002	con_08m_m67_a3_002.xlsx_RoiSetAuto-144.zip Distance px	4	2512.18	0.639544	318.361	7.89096	89.6711
	con_08m_m67_a3_002	con_08m_m67_a3_002.xlsx_RoiSetAuto-145.zip Distance px	3	2781.69	0.6215	318.361	8.73754	89.6711
	con_08m_m67_a3_002	con_08m_m67_a3_002.xlsx_RoiSetAuto-146.zip Distance px	5	2960.77	0.484067	318.361	9.30004	89.6711
	con_08m_m67_a3_002	con_08m_m67_a3_002.xlsx_RoiSetAuto-147.zip Distance px	4	3865.6	0.100206	318.361	12.1422	89.6711
	con_08m_m67_a3_002	con_08m_m67_a3_002.xlsx_RoiSetAuto-148.zip Distance px	4	2496.32	0.334087	318.361	7.84114	89.6711
	con_08m_m67_a3_002	con_08m_m67_a3_002.xlsx_RoiSetAuto-15.zip Distance px	11	3275.43	0.493799	318.361	10.2884	89.6711
	con_08m_m67_a3_002	con_08m_m67_a3_002.xlsx_RoiSetAuto-16.zip Distance px	6	2566.74	0.519119	318.361	8.06237	89.6711
	con_08m_m67_a3_002	con_08m_m67_a3_002.xlsx_RoiSetAuto-17.zip Distance px	5	2648.96	0.333023	318.361	8.32062	89.6711
	con_08m_m67_a3_002	con_08m_m67_a3_002.xlsx_RoiSetAuto-19.zip Distance px	5	2369.54	0.279144	318.361	7.44294	89.6711
	con_08m_m67_a3_002	con_08m_m67_a3_002.xlsx_RoiSetAuto-2.zip Distance px	18	3767.66	0.974616	318.361	11.8345	89.6711
	con_08m_m67_a3_002	con_08m_m67_a3_002.xlsx_RoiSetAuto-20.zip Distance px	3	2370.9	0.229409	318.361	7.44719	89.6711
	con_08m_m67_a3_002	con_08m_m67_a3_002.xlsx_RoiSetAuto-21.zip Distance px	35	3096.79	0.98331	318.361	9.72728	89.6711
	con_08m_m67_a3_002	con_08m_m67_a3_002.xlsx_RoiSetAuto-22.zip Distance px	3	2482.17	0.280913	318.361	7.7967	89.6711
	con_08m_m67_a3_002	con_08m_m67_a3_002.xlsx_RoiSetAuto-23.zip Distance px	19	3192.07	1.02244	318.361	10.0266	89.6711
	con_08m_m67_a3_002	con_08m_m67_a3_002.xlsx_RoiSetAuto-24.zip Distance px	52	5708.84	0.661122	318.361	17.932	89.6711
	con_08m_m67_a3_002	con_08m_m67_a3_002.xlsx_RoiSetAuto-26.zip Distance px	4	2384.05	0.300268	318.361	7.48849	89.6711
	con_08m_m67_a3_002	con_08m_m67_a3_002.xlsx_RoiSetAuto-28.zip Distance px	3	2129.25	0.226768	318.361	6.68815	89.6711
	con_08m_m67_a3_002	con_08m_m67_a3_002.xlsx_RoiSetAuto-29.zip Distance px	79	3526.5	0.708141	318.361	11.0771	89.6711
	con_08m_m67_a3_002	con_08m_m67_a3_002.xlsx_RoiSetAuto-3.zip Distance px	141	5267.35	1.67265	318.361	16.5452	89.6711
	con_08m_m67_a3_002	con_08m_m67_a3_002.xlsx_RoiSetAuto-30.zip Distance px	89	5213.45	0.841855	318.361	16.3759	89.6711
	con_08m_m67_a3_002	con_08m_m67_a3_002.xlsx_RoiSetAuto-31.zip Distance px	66	3993.63	0.955437	318.361	12.5443	89.6711
	con_08m_m67_a3_002	con_08m_m67_a3_002.xlsx_RoiSetAuto-32.zip Distance px	57	4357.43	0.965864	318.361	13.6871	89.6711
	con_08m_m67_a3_002	con_08m_m67_a3_002.xlsx_RoiSetAuto-33.zip Distance px	43	3637	0.863073	318.361	11.4241	89.6711
	con_08m_m67_a3_002	con_08m_m67_a3_002.xlsx_RoiSetAuto-34.zip Distance px	50	4124.15	0.91051	318.361	12.9543	89.6711
	con_08m_m67_a3_002	con_08m_m67_a3_002.xlsx_RoiSetAuto-35.zip Distance px	6	2844.74	0.607749	318.361	8.93559	89.6711
	con_08m_m67_a3_002	con_08m_m67_a3_002.xlsx_RoiSetAuto-36.zip Distance px	92	3915.3	0.98514	318.361	12.2983	89.6711
	con_08m_m67_a3_002	con_08m_m67_a3_002.xlsx_RoiSetAuto-37.zip Distance px	22	2711.54	0.553417	318.361	8.51717	89.6711
	con_08m_m67_a3_002	con_08m_m67_a3_002.xlsx_RoiSetAuto-38.zip Distance px	17	3109.89	0.729867	318.361	9.76845	89.6711
	con_08m_m67_a3_002	con_08m_m67_a3_002.xlsx_RoiSetAuto-4.zip Distance px	76	3829.08	0.938762	318.361	12.0275	89.6711
	con_08m_m67_a3_002	con_08m_m67_a3_002.xlsx_RoiSetAuto-40.zip Distance px	3	2248.13	0.194933	318.361	7.06156	89.6711
	con_08m_m67_a3_002	con_08m_m67_a3_002.xlsx_RoiSetAuto-41.zip Distance px	30	4036.82	0.913118	318.361	12.68	89.6711
	con_08m_m67_a3_002	con_08m_m67_a3_002.xlsx_RoiSetAuto-42.zip Distance px	48	4171.55	1.38138	318.361	13.1032	89.6711
	con_08m_m67_a3_002	con_08m_m67_a3_002.xlsx_RoiSetAuto-43.zip Distance px	5	4896.87	0.501017	318.361	15.3815	89.6711
	con_08m_m67_a3_002	con_08m_m67_a3_002.xlsx_RoiSetAuto-44.zip Distance px	7	2496.26	0.88341	318.361	7.84097	89.6711
	con_08m_m67_a3_002	con_08m_m67_a3_002.xlsx_RoiSetAuto-45.zip Distance px	10	2861.71	0.689826	318.361	8.98888	89.6711
	con_08m_m67_a3_002	con_08m_m67_a3_002.xlsx_RoiSetAuto-47.zip Distance px	11	2994.73	0.71712	318.361	9.40671	89.6711
	con_08m_m67_a3_002	con_08m_m67_a3_002.xlsx_RoiSetAuto-48.zip Distance px	113	4087.45	1.28004	318.361	12.839	89.6711
	con_08m_m67_a3_002	con_08m_m67_a3_002.xlsx_RoiSetAuto-49.zip Distance px	3	2535.32	0.218418	318.361	7.96366	89.6711
	con_08m_m67_a3_002	con_08m_m67_a3_002.xlsx_RoiSetAuto-50.zip Distance px	30	2755.71	0.711563	318.361	8.65592	89.6711
	con_08m_m67_a3_002	con_08m_m67_a3_002.xlsx_RoiSetAuto-51.zip Distance px	79	3926.61	0.951806	318.361	12.3338	89.6711
	con_08m_m67_a3_002	con_08m_m67_a3_002.xlsx_RoiSetAuto-52.zip Distance px	11	2699.01	0.496682	318.361	8.47784	89.6711
	con_08m_m67_a3_002	con_08m_m67_a3_002.xlsx_RoiSetAuto-53.zip Distance px	35	3143.17	0.84917	318.361	9.87298	89.6711
	con_08m_m67_a3_002	con_08m_m67_a3_002.xlsx_RoiSetAuto-54.zip Distance px	5	2480.7	0.445351	318.361	7.7921	89.6711
	con_08m_m67_a3_002	con_08m_m67_a3_002.xlsx_RoiSetAuto-55.zip Distance px	4	2213.63	0.260544	318.361	6.95321	89.6711
	con_08m_m67_a3_002	con_08m_m67_a3_002.xlsx_RoiSetAuto-56.zip Distance px	25	2872.13	0.831903	318.361	9.02162	89.6711
	con_08m_m67_a3_002	con_08m_m67_a3_002.xlsx_RoiSetAuto-57.zip Distance px	6	2678.57	0.294148	318.361	8.41363	89.6711
	con_08m_m67_a3_002	con_08m_m67_a3_002.xlsx_RoiSetAuto-59.zip Distance px	28	3612.26	1.07233	318.361	11.3464	89.6711
	con_08m_m67_a3_002	con_08m_m67_a3_002.xlsx_RoiSetAuto-6.zip Distance px	103	6853.67	0.75706	318.361	21.528	89.6711
	con_08m_m67_a3_002	con_08m_m67_a3_002.xlsx_RoiSetAuto-60.zip Distance px	3	2265.03	0.072957	318.361	7.11465	89.6711
	con_08m_m67_a3_002	con_08m_m67_a3_002.xlsx_RoiSetAuto-61.zip Distance px	4	2207.4	0.526065	318.361	6.93363	89.6711
	con_08m_m67_a3_002	con_08m_m67_a3_002.xlsx_RoiSetAuto-62.zip Distance px	5	2368.45	0.465351	318.361	7.43949	89.6711
	con_08m_m67_a3_002	con_08m_m67_a3_002.xlsx_RoiSetAuto-63.zip Distance px	5	2310.76	0.267498	318.361	7.25828	89.6711
	con_08m_m67_a3_002	con_08m_m67_a3_002.xlsx_RoiSetAuto-64.zip Distance px	100	3816.51	0.96818	318.361	11.988	89.6711
	con_08m_m67_a3_002	con_08m_m67_a3_002.xlsx_RoiSetAuto-65.zip Distance px	53	3721.56	1.30009	318.361	11.6897	89.6711
	con_08m_m67_a3_002	con_08m_m67_a3_002.xlsx_RoiSetAuto-66.zip Distance px	64	4034.1	1.13502	318.361	12.6715	89.6711
	con_08m_m67_a3_002	con_08m_m67_a3_002.xlsx_RoiSetAuto-67.zip Distance px	138	5774.69	1.11368	318.361	18.1388	89.6711
	con_08m_m67_a3_002	con_08m_m67_a3_002.xlsx_RoiSetAuto-68.zip Distance px	8	2490.84	0.461851	318.361	7.82393	89.6711
	con_08m_m67_a3_002	con_08m_m67_a3_002.xlsx_RoiSetAuto-69.zip Distance px	71	5104.77	1.22591	318.361	16.0345	89.6711
	con_08m_m67_a3_002	con_08m_m67_a3_002.xlsx_RoiSetAuto-7.zip Distance px	40	3718.18	0.635888	318.361	11.6791	89.6711
	con_08m_m67_a3_002	con_08m_m67_a3_002.xlsx_RoiSetAuto-70.zip Distance px	13	3328.34	0.485	318.361	10.4546	89.6711
	con_08m_m67_a3_002	con_08m_m67_a3_002.xlsx_RoiSetAuto-71.zip Distance px	8	2822.14	0.558379	318.361	8.86459	89.6711
	con_08m_m67_a3_002	con_08m_m67_a3_002.xlsx_RoiSetAuto-72.zip Distance px	3	2457.38	0.074266	318.361	7.71884	89.6711
	con_08m_m67_a3_002	con_08m_m67_a3_002.xlsx_RoiSetAuto-73.zip Distance px	33	3578.87	1.05925	318.361	11.2415	89.6711
	con_08m_m67_a3_002	con_08m_m67_a3_002.xlsx_RoiSetAuto-74.zip Distance px	110	5671.11	1.16935	318.361	17.8135	89.6711
	con_08m_m67_a3_002	con_08m_m67_a3_002.xlsx_RoiSetAuto-75.zip Distance px	3	1848.41	0.313944	318.361	5.80602	89.6711
	con_08m_m67_a3_002	con_08m_m67_a3_002.xlsx_RoiSetAuto-76.zip Distance px	11	2759.77	0.58524	318.361	8.66867	89.6711
	con_08m_m67_a3_002	con_08m_m67_a3_002.xlsx_RoiSetAuto-77.zip Distance px	6	3215.76	0.475319	318.361	10.101	89.6711
	con_08m_m67_a3_002	con_08m_m67_a3_002.xlsx_RoiSetAuto-78.zip Distance px	6	2404.17	0.344111	318.361	7.5517	89.6711
	con_08m_m67_a3_002	con_08m_m67_a3_002.xlsx_RoiSetAuto-79.zip Distance px	109	8244.47	1.14887	318.361	25.8966	89.6711
	con_08m_m67_a3_002	con_08m_m67_a3_002.xlsx_RoiSetAuto-8.zip Distance px	34	4612.77	0.678073	318.361	14.4891	89.6711
	con_08m_m67_a3_002	con_08m_m67_a3_002.xlsx_RoiSetAuto-80.zip Distance px	4	2371.9	0.098283	318.361	7.45033	89.6711
	con_08m_m67_a3_002	con_08m_m67_a3_002.xlsx_RoiSetAuto-81.zip Distance px	10	3914.51	0.532464	318.361	12.2958	89.6711
	con_08m_m67_a3_002	con_08m_m67_a3_002.xlsx_RoiSetAuto-82.zip Distance px	6	2212.25	0.508843	318.361	6.94886	89.6711
	con_08m_m67_a3_002	con_08m_m67_a3_002.xlsx_RoiSetAuto-84.zip Distance px	3	2471.44	0.201369	318.361	7.763	89.6711
	con_08m_m67_a3_002	con_08m_m67_a3_002.xlsx_RoiSetAuto-85.zip Distance px	3	2375.1	0.323672	318.361	7.46038	89.6711
	con_08m_m67_a3_002	con_08m_m67_a3_002.xlsx_RoiSetAuto-86.zip Distance px	26	4133.6	0.670673	318.361	12.984	89.6711
	con_08m_m67_a3_002	con_08m_m67_a3_002.xlsx_RoiSetAuto-87.zip Distance px	8	4167.8	0.20189	318.361	13.0914	89.6711
	con_08m_m67_a3_002	con_08m_m67_a3_002.xlsx_RoiSetAuto-88.zip Distance px	44	3390.22	1.24934	318.361	10.649	89.6711
	con_08m_m67_a3_002	con_08m_m67_a3_002.xlsx_RoiSetAuto-89.zip Distance px	18	2893.71	0.527034	318.361	9.0894	89.6711
	con_08m_m67_a3_002	con_08m_m67_a3_002.xlsx_RoiSetAuto-9.zip Distance px	9	3033.91	0.679232	318.361	9.52976	89.6711
	con_08m_m67_a3_002	con_08m_m67_a3_002.xlsx_RoiSetAuto-91.zip Distance px	13	2490.02	0.543285	318.361	7.82136	89.6711
	con_08m_m67_a3_002	con_08m_m67_a3_002.xlsx_RoiSetAuto-92.zip Distance px	23	3872.21	1.13101	318.361	12.1629	89.6711
	con_08m_m67_a3_002	con_08m_m67_a3_002.xlsx_RoiSetAuto-93.zip Distance px	3	2407.35	0.259061	318.361	7.5617	89.6711
	con_08m_m67_a3_002	con_08m_m67_a3_002.xlsx_RoiSetAuto-94.zip Distance px	73	3075.03	1.07497	318.361	9.65892	89.6711
	con_08m_m67_a3_002	con_08m_m67_a3_002.xlsx_RoiSetAuto-95.zip Distance px	20	3709.12	1.08778	318.361	11.6507	89.6711
	con_08m_m67_a3_002	con_08m_m67_a3_002.xlsx_RoiSetAuto-96.zip Distance px	4	2141.97	0.279037	318.361	6.7281	89.6711
	con_08m_m67_a3_002	con_08m_m67_a3_002.xlsx_RoiSetAuto-97.zip Distance px	21	6187.35	0.557765	318.361	19.435	89.6711
	con_08m_m67_a3_002	con_08m_m67_a3_002.xlsx_RoiSetAuto-98.zip Distance px	64	3814.2	1.0609	318.361	11.9807	89.6711
	con_08m_m67_a3_002	con_08m_m67_a3_002.xlsx_RoiSetAuto-99.zip Distance px	4	2853.3	0.488145	318.361	8.96245	89.6711
	con_08m_m67_a3_003	con_08m_m67_a3_003.xlsx_RoiSetAuto-1.zip Distance px	12	2794.46	0.873838	242.01	11.5469	150.418
	con_08m_m67_a3_003	con_08m_m67_a3_003.xlsx_RoiSetAuto-100.zip Distance px	105	3657.26	1.04865	242.01	15.112	150.418
	con_08m_m67_a3_003	con_08m_m67_a3_003.xlsx_RoiSetAuto-101.zip Distance px	6	2252.59	0.531708	242.01	9.30781	150.418
	con_08m_m67_a3_003	con_08m_m67_a3_003.xlsx_RoiSetAuto-102.zip Distance px	16	2134.75	0.39798	242.01	8.82091	150.418
	con_08m_m67_a3_003	con_08m_m67_a3_003.xlsx_RoiSetAuto-103.zip Distance px	34	3214.47	0.908725	242.01	13.2824	150.418
	con_08m_m67_a3_003	con_08m_m67_a3_003.xlsx_RoiSetAuto-104.zip Distance px	31	2306.67	0.696099	242.01	9.53128	150.418
	con_08m_m67_a3_003	con_08m_m67_a3_003.xlsx_RoiSetAuto-105.zip Distance px	3	1883.53	0.466592	242.01	7.78284	150.418
	con_08m_m67_a3_003	con_08m_m67_a3_003.xlsx_RoiSetAuto-106.zip Distance px	9	2176.04	0.357119	242.01	8.99153	150.418
	con_08m_m67_a3_003	con_08m_m67_a3_003.xlsx_RoiSetAuto-107.zip Distance px	5	2449.17	0.28021	242.01	10.1201	150.418
	con_08m_m67_a3_003	con_08m_m67_a3_003.xlsx_RoiSetAuto-109.zip Distance px	32	2337.47	0.628449	242.01	9.65855	150.418
	con_08m_m67_a3_003	con_08m_m67_a3_003.xlsx_RoiSetAuto-110.zip Distance px	4	1825.48	0.230006	242.01	7.543	150.418
	con_08m_m67_a3_003	con_08m_m67_a3_003.xlsx_RoiSetAuto-112.zip Distance px	42	2472.98	1.16415	242.01	10.2185	150.418
	con_08m_m67_a3_003	con_08m_m67_a3_003.xlsx_RoiSetAuto-113.zip Distance px	34	2617.56	0.759507	242.01	10.8159	150.418
	con_08m_m67_a3_003	con_08m_m67_a3_003.xlsx_RoiSetAuto-114.zip Distance px	51	3151.47	1.01052	242.01	13.0221	150.418
	con_08m_m67_a3_003	con_08m_m67_a3_003.xlsx_RoiSetAuto-115.zip Distance px	7	2660.76	0.415722	242.01	10.9944	150.418
	con_08m_m67_a3_003	con_08m_m67_a3_003.xlsx_RoiSetAuto-116.zip Distance px	4	2081.41	0.887418	242.01	8.60048	150.418
	con_08m_m67_a3_003	con_08m_m67_a3_003.xlsx_RoiSetAuto-117.zip Distance px	45	2653.28	0.75993	242.01	10.9635	150.418
	con_08m_m67_a3_003	con_08m_m67_a3_003.xlsx_RoiSetAuto-118.zip Distance px	5	1769.24	0.39498	242.01	7.31062	150.418
	con_08m_m67_a3_003	con_08m_m67_a3_003.xlsx_RoiSetAuto-119.zip Distance px	39	2276.89	0.805619	242.01	9.40823	150.418
	con_08m_m67_a3_003	con_08m_m67_a3_003.xlsx_RoiSetAuto-12.zip Distance px	7	2143.15	0.40133	242.01	8.8556	150.418
	con_08m_m67_a3_003	con_08m_m67_a3_003.xlsx_RoiSetAuto-120.zip Distance px	14	2397.62	0.63605	242.01	9.90712	150.418
	con_08m_m67_a3_003	con_08m_m67_a3_003.xlsx_RoiSetAuto-123.zip Distance px	36	2593.36	0.885393	242.01	10.7159	150.418
	con_08m_m67_a3_003	con_08m_m67_a3_003.xlsx_RoiSetAuto-124.zip Distance px	30	3407.63	1.05298	242.01	14.0805	150.418
	con_08m_m67_a3_003	con_08m_m67_a3_003.xlsx_RoiSetAuto-126.zip Distance px	3	1842.32	0.191612	242.01	7.61255	150.418
	con_08m_m67_a3_003	con_08m_m67_a3_003.xlsx_RoiSetAuto-128.zip Distance px	3	2322.8	0.313914	242.01	9.59796	150.418
	con_08m_m67_a3_003	con_08m_m67_a3_003.xlsx_RoiSetAuto-131.zip Distance px	5	1927.2	0.279436	242.01	7.96332	150.418
	con_08m_m67_a3_003	con_08m_m67_a3_003.xlsx_RoiSetAuto-132.zip Distance px	7	1908.25	0.296811	242.01	7.88501	150.418
	con_08m_m67_a3_003	con_08m_m67_a3_003.xlsx_RoiSetAuto-133.zip Distance px	22	2543.23	0.891215	242.01	10.5088	150.418
	con_08m_m67_a3_003	con_08m_m67_a3_003.xlsx_RoiSetAuto-134.zip Distance px	32	2410.9	0.919382	242.01	9.96199	150.418
	con_08m_m67_a3_003	con_08m_m67_a3_003.xlsx_RoiSetAuto-137.zip Distance px	10	2621.53	0.611848	242.01	10.8323	150.418
	con_08m_m67_a3_003	con_08m_m67_a3_003.xlsx_RoiSetAuto-138.zip Distance px	5	2352.12	0.546557	242.01	9.71908	150.418
	con_08m_m67_a3_003	con_08m_m67_a3_003.xlsx_RoiSetAuto-14.zip Distance px	14	5186.41	0.549217	242.01	21.4305	150.418
	con_08m_m67_a3_003	con_08m_m67_a3_003.xlsx_RoiSetAuto-140.zip Distance px	89	2990.64	1.56746	242.01	12.3575	150.418
	con_08m_m67_a3_003	con_08m_m67_a3_003.xlsx_RoiSetAuto-141.zip Distance px	3	1653.63	0.199	242.01	6.83291	150.418
	con_08m_m67_a3_003	con_08m_m67_a3_003.xlsx_RoiSetAuto-143.zip Distance px	3	1654.68	0.153137	242.01	6.83722	150.418
	con_08m_m67_a3_003	con_08m_m67_a3_003.xlsx_RoiSetAuto-144.zip Distance px	4	2327.34	0.542253	242.01	9.61668	150.418
	con_08m_m67_a3_003	con_08m_m67_a3_003.xlsx_RoiSetAuto-145.zip Distance px	5	2243.39	0.265617	242.01	9.2698	150.418
	con_08m_m67_a3_003	con_08m_m67_a3_003.xlsx_RoiSetAuto-147.zip Distance px	4	1928.39	0.503434	242.01	7.9682	150.418
	con_08m_m67_a3_003	con_08m_m67_a3_003.xlsx_RoiSetAuto-148.zip Distance px	32	3040.51	0.774425	242.01	12.5635	150.418
	con_08m_m67_a3_003	con_08m_m67_a3_003.xlsx_RoiSetAuto-149.zip Distance px	52	2615.87	0.723843	242.01	10.8089	150.418
	con_08m_m67_a3_003	con_08m_m67_a3_003.xlsx_RoiSetAuto-151.zip Distance px	3	1854	0.481544	242.01	7.66082	150.418
	con_08m_m67_a3_003	con_08m_m67_a3_003.xlsx_RoiSetAuto-152.zip Distance px	8	2436.51	0.723084	242.01	10.0678	150.418
	con_08m_m67_a3_003	con_08m_m67_a3_003.xlsx_RoiSetAuto-153.zip Distance px	3	2270.12	0.264389	242.01	9.38027	150.418
	con_08m_m67_a3_003	con_08m_m67_a3_003.xlsx_RoiSetAuto-156.zip Distance px	67	6317.35	0.9881	242.01	26.1036	150.418
	con_08m_m67_a3_003	con_08m_m67_a3_003.xlsx_RoiSetAuto-157.zip Distance px	5	2182.9	0.707642	242.01	9.01987	150.418
	con_08m_m67_a3_003	con_08m_m67_a3_003.xlsx_RoiSetAuto-158.zip Distance px	3	2568.61	0.399822	242.01	10.6136	150.418
	con_08m_m67_a3_003	con_08m_m67_a3_003.xlsx_RoiSetAuto-159.zip Distance px	3	2054.18	0.438822	242.01	8.48798	150.418
	con_08m_m67_a3_003	con_08m_m67_a3_003.xlsx_RoiSetAuto-16.zip Distance px	210	6975.56	0.856107	242.01	28.8234	150.418
	con_08m_m67_a3_003	con_08m_m67_a3_003.xlsx_RoiSetAuto-160.zip Distance px	3	2411.14	0.456225	242.01	9.96299	150.418
	con_08m_m67_a3_003	con_08m_m67_a3_003.xlsx_RoiSetAuto-161.zip Distance px	8	2192.43	0.907696	242.01	9.05925	150.418
	con_08m_m67_a3_003	con_08m_m67_a3_003.xlsx_RoiSetAuto-162.zip Distance px	41	2376.3	0.763859	242.01	9.81902	150.418
	con_08m_m67_a3_003	con_08m_m67_a3_003.xlsx_RoiSetAuto-163.zip Distance px	12	2053.91	0.91441	242.01	8.48685	150.418
	con_08m_m67_a3_003	con_08m_m67_a3_003.xlsx_RoiSetAuto-164.zip Distance px	57	3145.7	1.06466	242.01	12.9982	150.418
	con_08m_m67_a3_003	con_08m_m67_a3_003.xlsx_RoiSetAuto-165.zip Distance px	5	2006.02	0.193617	242.01	8.28901	150.418
	con_08m_m67_a3_003	con_08m_m67_a3_003.xlsx_RoiSetAuto-168.zip Distance px	32	3316.01	1.04288	242.01	13.7019	150.418
	con_08m_m67_a3_003	con_08m_m67_a3_003.xlsx_RoiSetAuto-17.zip Distance px	11	2667.29	0.387735	242.01	11.0214	150.418
	con_08m_m67_a3_003	con_08m_m67_a3_003.xlsx_RoiSetAuto-170.zip Distance px	5	2426.01	0.685535	242.01	10.0244	150.418
	con_08m_m67_a3_003	con_08m_m67_a3_003.xlsx_RoiSetAuto-173.zip Distance px	3	1956.04	0.378357	242.01	8.08248	150.418
	con_08m_m67_a3_003	con_08m_m67_a3_003.xlsx_RoiSetAuto-175.zip Distance px	9	5129.42	0.621262	242.01	21.1951	150.418
	con_08m_m67_a3_003	con_08m_m67_a3_003.xlsx_RoiSetAuto-176.zip Distance px	15	1979.58	0.706368	242.01	8.17974	150.418
	con_08m_m67_a3_003	con_08m_m67_a3_003.xlsx_RoiSetAuto-177.zip Distance px	5	1960.81	0.48572	242.01	8.1022	150.418
	con_08m_m67_a3_003	con_08m_m67_a3_003.xlsx_RoiSetAuto-178.zip Distance px	34	2367.92	0.615211	242.01	9.7844	150.418
	con_08m_m67_a3_003	con_08m_m67_a3_003.xlsx_RoiSetAuto-18.zip Distance px	12	1978.41	0.599379	242.01	8.1749	150.418
	con_08m_m67_a3_003	con_08m_m67_a3_003.xlsx_RoiSetAuto-180.zip Distance px	50	4420.56	1.34071	242.01	18.266	150.418
	con_08m_m67_a3_003	con_08m_m67_a3_003.xlsx_RoiSetAuto-182.zip Distance px	8	2269.57	0.824357	242.01	9.378	150.418
	con_08m_m67_a3_003	con_08m_m67_a3_003.xlsx_RoiSetAuto-183.zip Distance px	48	2589.66	0.821377	242.01	10.7006	150.418
	con_08m_m67_a3_003	con_08m_m67_a3_003.xlsx_RoiSetAuto-184.zip Distance px	4	2419.97	0.678221	242.01	9.99946	150.418
	con_08m_m67_a3_003	con_08m_m67_a3_003.xlsx_RoiSetAuto-185.zip Distance px	13	3149.79	0.946344	242.01	13.0151	150.418
	con_08m_m67_a3_003	con_08m_m67_a3_003.xlsx_RoiSetAuto-186.zip Distance px	9	2123.6	0.470111	242.01	8.77483	150.418
	con_08m_m67_a3_003	con_08m_m67_a3_003.xlsx_RoiSetAuto-187.zip Distance px	38	2646.9	1.10684	242.01	10.9371	150.418
	con_08m_m67_a3_003	con_08m_m67_a3_003.xlsx_RoiSetAuto-190.zip Distance px	3	2261.75	0.256485	242.01	9.34566	150.418
	con_08m_m67_a3_003	con_08m_m67_a3_003.xlsx_RoiSetAuto-191.zip Distance px	4	2232.91	0.633785	242.01	9.22649	150.418
	con_08m_m67_a3_003	con_08m_m67_a3_003.xlsx_RoiSetAuto-193.zip Distance px	11	2542.22	0.638366	242.01	10.5046	150.418
	con_08m_m67_a3_003	con_08m_m67_a3_003.xlsx_RoiSetAuto-194.zip Distance px	5	2451.15	0.504754	242.01	10.1283	150.418
	con_08m_m67_a3_003	con_08m_m67_a3_003.xlsx_RoiSetAuto-196.zip Distance px	16	2440.51	0.935428	242.01	10.0843	150.418
	con_08m_m67_a3_003	con_08m_m67_a3_003.xlsx_RoiSetAuto-197.zip Distance px	18	2217.28	0.89373	242.01	9.16191	150.418
	con_08m_m67_a3_003	con_08m_m67_a3_003.xlsx_RoiSetAuto-198.zip Distance px	22	4064.62	0.736695	242.01	16.7952	150.418
	con_08m_m67_a3_003	con_08m_m67_a3_003.xlsx_RoiSetAuto-199.zip Distance px	4	1850.13	0.306223	242.01	7.64484	150.418
	con_08m_m67_a3_003	con_08m_m67_a3_003.xlsx_RoiSetAuto-2.zip Distance px	4	2180.41	0.289341	242.01	9.00957	150.418
	con_08m_m67_a3_003	con_08m_m67_a3_003.xlsx_RoiSetAuto-20.zip Distance px	3	1692.13	0.234986	242.01	6.99198	150.418
	con_08m_m67_a3_003	con_08m_m67_a3_003.xlsx_RoiSetAuto-200.zip Distance px	27	3556.28	0.885359	242.01	14.6947	150.418
	con_08m_m67_a3_003	con_08m_m67_a3_003.xlsx_RoiSetAuto-201.zip Distance px	4	2098.91	0.185205	242.01	8.67283	150.418
	con_08m_m67_a3_003	con_08m_m67_a3_003.xlsx_RoiSetAuto-202.zip Distance px	14	2136.07	0.758475	242.01	8.82638	150.418
	con_08m_m67_a3_003	con_08m_m67_a3_003.xlsx_RoiSetAuto-203.zip Distance px	8	1946.23	0.511353	242.01	8.04192	150.418
	con_08m_m67_a3_003	con_08m_m67_a3_003.xlsx_RoiSetAuto-206.zip Distance px	25	2876.89	0.850886	242.01	11.8875	150.418
	con_08m_m67_a3_003	con_08m_m67_a3_003.xlsx_RoiSetAuto-208.zip Distance px	10	3446.05	0.636361	242.01	14.2393	150.418
	con_08m_m67_a3_003	con_08m_m67_a3_003.xlsx_RoiSetAuto-210.zip Distance px	6	1874.73	0.600588	242.01	7.7465	150.418
	con_08m_m67_a3_003	con_08m_m67_a3_003.xlsx_RoiSetAuto-211.zip Distance px	4	1844.23	0.482392	242.01	7.62046	150.418
	con_08m_m67_a3_003	con_08m_m67_a3_003.xlsx_RoiSetAuto-212.zip Distance px	4	1805.62	0.236775	242.01	7.46093	150.418
	con_08m_m67_a3_003	con_08m_m67_a3_003.xlsx_RoiSetAuto-213.zip Distance px	3	1627.03	0.389896	242.01	6.72296	150.418
	con_08m_m67_a3_003	con_08m_m67_a3_003.xlsx_RoiSetAuto-214.zip Distance px	14	2876.47	0.733387	242.01	11.8858	150.418
	con_08m_m67_a3_003	con_08m_m67_a3_003.xlsx_RoiSetAuto-215.zip Distance px	3	2431.31	0.426224	242.01	10.0463	150.418
	con_08m_m67_a3_003	con_08m_m67_a3_003.xlsx_RoiSetAuto-216.zip Distance px	4	1808.97	0.377341	242.01	7.47477	150.418
	con_08m_m67_a3_003	con_08m_m67_a3_003.xlsx_RoiSetAuto-217.zip Distance px	4	2164.29	0.54773	242.01	8.94299	150.418
	con_08m_m67_a3_003	con_08m_m67_a3_003.xlsx_RoiSetAuto-219.zip Distance px	3	2296.86	0.468885	242.01	9.49077	150.418
	con_08m_m67_a3_003	con_08m_m67_a3_003.xlsx_RoiSetAuto-22.zip Distance px	9	1999.56	0.464185	242.01	8.26228	150.418
	con_08m_m67_a3_003	con_08m_m67_a3_003.xlsx_RoiSetAuto-221.zip Distance px	4	2136.57	0.472147	242.01	8.82844	150.418
	con_08m_m67_a3_003	con_08m_m67_a3_003.xlsx_RoiSetAuto-222.zip Distance px	4	2989.99	0.196275	242.01	12.3548	150.418
	con_08m_m67_a3_003	con_08m_m67_a3_003.xlsx_RoiSetAuto-223.zip Distance px	3	2700.18	0.646783	242.01	11.1573	150.418
	con_08m_m67_a3_003	con_08m_m67_a3_003.xlsx_RoiSetAuto-24.zip Distance px	4	1898.59	0.189252	242.01	7.8451	150.418
	con_08m_m67_a3_003	con_08m_m67_a3_003.xlsx_RoiSetAuto-27.zip Distance px	4	1711.65	0.148547	242.01	7.07264	150.418
	con_08m_m67_a3_003	con_08m_m67_a3_003.xlsx_RoiSetAuto-29.zip Distance px	5	2047.73	0.291318	242.01	8.46135	150.418
	con_08m_m67_a3_003	con_08m_m67_a3_003.xlsx_RoiSetAuto-3.zip Distance px	141	4699.9	1.11263	242.01	19.4203	150.418
	con_08m_m67_a3_003	con_08m_m67_a3_003.xlsx_RoiSetAuto-31.zip Distance px	30	3649.08	1.05982	242.01	15.0782	150.418
	con_08m_m67_a3_003	con_08m_m67_a3_003.xlsx_RoiSetAuto-32.zip Distance px	95	3819.91	1.35778	242.01	15.7841	150.418
	con_08m_m67_a3_003	con_08m_m67_a3_003.xlsx_RoiSetAuto-34.zip Distance px	21	2449.04	0.906635	242.01	10.1196	150.418
	con_08m_m67_a3_003	con_08m_m67_a3_003.xlsx_RoiSetAuto-37.zip Distance px	14	1857.77	0.505768	242.01	7.67642	150.418
	con_08m_m67_a3_003	con_08m_m67_a3_003.xlsx_RoiSetAuto-38.zip Distance px	22	2133.23	0.638453	242.01	8.81462	150.418
	con_08m_m67_a3_003	con_08m_m67_a3_003.xlsx_RoiSetAuto-4.zip Distance px	42	3353.1	0.889442	242.01	13.8552	150.418
	con_08m_m67_a3_003	con_08m_m67_a3_003.xlsx_RoiSetAuto-40.zip Distance px	5	2168.17	0.46127	242.01	8.95901	150.418
	con_08m_m67_a3_003	con_08m_m67_a3_003.xlsx_RoiSetAuto-44.zip Distance px	4	2148.6	0.18419	242.01	8.87813	150.418
	con_08m_m67_a3_003	con_08m_m67_a3_003.xlsx_RoiSetAuto-45.zip Distance px	4	2028.2	0.616185	242.01	8.38063	150.418
	con_08m_m67_a3_003	con_08m_m67_a3_003.xlsx_RoiSetAuto-46.zip Distance px	47	2994.86	0.971883	242.01	12.3749	150.418
	con_08m_m67_a3_003	con_08m_m67_a3_003.xlsx_RoiSetAuto-47.zip Distance px	37	3971.6	1.01065	242.01	16.4109	150.418
	con_08m_m67_a3_003	con_08m_m67_a3_003.xlsx_RoiSetAuto-48.zip Distance px	139	3905.24	1.7203	242.01	16.1367	150.418
	con_08m_m67_a3_003	con_08m_m67_a3_003.xlsx_RoiSetAuto-49.zip Distance px	3	2130.95	0.378662	242.01	8.80519	150.418
	con_08m_m67_a3_003	con_08m_m67_a3_003.xlsx_RoiSetAuto-50.zip Distance px	60	4516.07	1.33535	242.01	18.6606	150.418
	con_08m_m67_a3_003	con_08m_m67_a3_003.xlsx_RoiSetAuto-51.zip Distance px	94	3715.3	1.28681	242.01	15.3518	150.418
	con_08m_m67_a3_003	con_08m_m67_a3_003.xlsx_RoiSetAuto-52.zip Distance px	11	2212.53	0.573736	242.01	9.14229	150.418
	con_08m_m67_a3_003	con_08m_m67_a3_003.xlsx_RoiSetAuto-56.zip Distance px	19	2653.9	0.536177	242.01	10.9661	150.418
	con_08m_m67_a3_003	con_08m_m67_a3_003.xlsx_RoiSetAuto-57.zip Distance px	5	2082.53	0.491668	242.01	8.60511	150.418
	con_08m_m67_a3_003	con_08m_m67_a3_003.xlsx_RoiSetAuto-58.zip Distance px	6	2110.12	0.505112	242.01	8.71915	150.418
	con_08m_m67_a3_003	con_08m_m67_a3_003.xlsx_RoiSetAuto-59.zip Distance px	4	1829.25	0.329597	242.01	7.55856	150.418
	con_08m_m67_a3_003	con_08m_m67_a3_003.xlsx_RoiSetAuto-60.zip Distance px	9	2006.35	0.368958	242.01	8.29036	150.418
	con_08m_m67_a3_003	con_08m_m67_a3_003.xlsx_RoiSetAuto-61.zip Distance px	9	2582.71	0.577883	242.01	10.6719	150.418
	con_08m_m67_a3_003	con_08m_m67_a3_003.xlsx_RoiSetAuto-62.zip Distance px	4	2134.3	0.435214	242.01	8.81907	150.418
	con_08m_m67_a3_003	con_08m_m67_a3_003.xlsx_RoiSetAuto-64.zip Distance px	7	2223.79	0.535523	242.01	9.18884	150.418
	con_08m_m67_a3_003	con_08m_m67_a3_003.xlsx_RoiSetAuto-65.zip Distance px	3	1856.09	0.81457	242.01	7.66948	150.418
	con_08m_m67_a3_003	con_08m_m67_a3_003.xlsx_RoiSetAuto-66.zip Distance px	89	3526.36	1.24542	242.01	14.5711	150.418
	con_08m_m67_a3_003	con_08m_m67_a3_003.xlsx_RoiSetAuto-69.zip Distance px	4	2503.3	0.514486	242.01	10.3438	150.418
	con_08m_m67_a3_003	con_08m_m67_a3_003.xlsx_RoiSetAuto-7.zip Distance px	20	2474.02	0.602779	242.01	10.2228	150.418
	con_08m_m67_a3_003	con_08m_m67_a3_003.xlsx_RoiSetAuto-70.zip Distance px	30	2440.02	0.747676	242.01	10.0823	150.418
	con_08m_m67_a3_003	con_08m_m67_a3_003.xlsx_RoiSetAuto-71.zip Distance px	3	2043.91	0.357821	242.01	8.44557	150.418
	con_08m_m67_a3_003	con_08m_m67_a3_003.xlsx_RoiSetAuto-72.zip Distance px	16	2180.77	0.672354	242.01	9.01107	150.418
	con_08m_m67_a3_003	con_08m_m67_a3_003.xlsx_RoiSetAuto-73.zip Distance px	5	1892.88	0.293042	242.01	7.82151	150.418
	con_08m_m67_a3_003	con_08m_m67_a3_003.xlsx_RoiSetAuto-74.zip Distance px	3	1906.09	0.113296	242.01	7.87608	150.418
	con_08m_m67_a3_003	con_08m_m67_a3_003.xlsx_RoiSetAuto-76.zip Distance px	6	2120.34	0.498565	242.01	8.76139	150.418
	con_08m_m67_a3_003	con_08m_m67_a3_003.xlsx_RoiSetAuto-79.zip Distance px	107	4166.01	1.26698	242.01	17.2142	150.418
	con_08m_m67_a3_003	con_08m_m67_a3_003.xlsx_RoiSetAuto-8.zip Distance px	7	3669.98	0.308885	242.01	15.1646	150.418
	con_08m_m67_a3_003	con_08m_m67_a3_003.xlsx_RoiSetAuto-80.zip Distance px	5	2102.68	0.411935	242.01	8.6884	150.418
	con_08m_m67_a3_003	con_08m_m67_a3_003.xlsx_RoiSetAuto-82.zip Distance px	32	2674.47	0.995996	242.01	11.0511	150.418
	con_08m_m67_a3_003	con_08m_m67_a3_003.xlsx_RoiSetAuto-83.zip Distance px	4	1988.51	0.430432	242.01	8.21664	150.418
	con_08m_m67_a3_003	con_08m_m67_a3_003.xlsx_RoiSetAuto-84.zip Distance px	22	2293.28	0.67627	242.01	9.47595	150.418
	con_08m_m67_a3_003	con_08m_m67_a3_003.xlsx_RoiSetAuto-86.zip Distance px	6	2082.37	0.45465	242.01	8.60446	150.418
	con_08m_m67_a3_003	con_08m_m67_a3_003.xlsx_RoiSetAuto-89.zip Distance px	4	1692.12	0.506248	242.01	6.99194	150.418
	con_08m_m67_a3_003	con_08m_m67_a3_003.xlsx_RoiSetAuto-9.zip Distance px	28	3708.72	0.732803	242.01	15.3246	150.418
	con_08m_m67_a3_003	con_08m_m67_a3_003.xlsx_RoiSetAuto-90.zip Distance px	4	1899.76	0.250535	242.01	7.84993	150.418
	con_08m_m67_a3_003	con_08m_m67_a3_003.xlsx_RoiSetAuto-93.zip Distance px	3	1842.97	0.307297	242.01	7.61527	150.418
	con_08m_m67_a3_003	con_08m_m67_a3_003.xlsx_RoiSetAuto-95.zip Distance px	5	1991.92	0.630948	242.01	8.23073	150.418
	con_08m_m67_a3_003	con_08m_m67_a3_003.xlsx_RoiSetAuto-96.zip Distance px	3	1838.01	0.266226	242.01	7.59477	150.418
	con_08m_m67_a3_003	con_08m_m67_a3_003.xlsx_RoiSetAuto-98.zip Distance px	4	2310.39	0.468493	242.01	9.54667	150.418
	con_08m_m67_a3_003	con_08m_m67_a3_003.xlsx_RoiSetAuto-99.zip Distance px	4	1910.67	0.575454	242.01	7.895	150.418
	shi_01m_m67_a3_001	shi_01m_m67_a3_001.xlsx_RoiSetAuto-1.zip Distance px	9	4095.55	0.568225	412.99	9.91681	86.9511
	shi_01m_m67_a3_001	shi_01m_m67_a3_001.xlsx_RoiSetAuto-10.zip Distance px	62	7707.6	0.895952	412.99	18.6629	86.9511
	shi_01m_m67_a3_001	shi_01m_m67_a3_001.xlsx_RoiSetAuto-11.zip Distance px	40	4336.82	1.28683	412.99	10.501	86.9511
	shi_01m_m67_a3_001	shi_01m_m67_a3_001.xlsx_RoiSetAuto-13.zip Distance px	3	3643.19	0.294967	412.99	8.8215	86.9511
	shi_01m_m67_a3_001	shi_01m_m67_a3_001.xlsx_RoiSetAuto-18.zip Distance px	9	3375.94	0.354877	412.99	8.1744	86.9511
	shi_01m_m67_a3_001	shi_01m_m67_a3_001.xlsx_RoiSetAuto-19.zip Distance px	8	4086.52	0.692899	412.99	9.89497	86.9511
	shi_01m_m67_a3_001	shi_01m_m67_a3_001.xlsx_RoiSetAuto-2.zip Distance px	62	6197.41	0.889997	412.99	15.0062	86.9511
	shi_01m_m67_a3_001	shi_01m_m67_a3_001.xlsx_RoiSetAuto-20.zip Distance px	47	4640.03	0.734293	412.99	11.2352	86.9511
	shi_01m_m67_a3_001	shi_01m_m67_a3_001.xlsx_RoiSetAuto-21.zip Distance px	3	3303.75	0.39692	412.99	7.99958	86.9511
	shi_01m_m67_a3_001	shi_01m_m67_a3_001.xlsx_RoiSetAuto-22.zip Distance px	42	4599.74	0.895148	412.99	11.1376	86.9511
	shi_01m_m67_a3_001	shi_01m_m67_a3_001.xlsx_RoiSetAuto-25.zip Distance px	4	3677.56	0.438439	412.99	8.90471	86.9511
	shi_01m_m67_a3_001	shi_01m_m67_a3_001.xlsx_RoiSetAuto-27.zip Distance px	26	7904.17	1.01284	412.99	19.1389	86.9511
	shi_01m_m67_a3_001	shi_01m_m67_a3_001.xlsx_RoiSetAuto-3.zip Distance px	5	3918.63	0.338611	412.99	9.48845	86.9511
	shi_01m_m67_a3_001	shi_01m_m67_a3_001.xlsx_RoiSetAuto-32.zip Distance px	146	7323.58	1.23022	412.99	17.7331	86.9511
	shi_01m_m67_a3_001	shi_01m_m67_a3_001.xlsx_RoiSetAuto-34.zip Distance px	9	3958.99	0.577659	412.99	9.58617	86.9511
	shi_01m_m67_a3_001	shi_01m_m67_a3_001.xlsx_RoiSetAuto-35.zip Distance px	26	5120.34	0.483261	412.99	12.3982	86.9511
	shi_01m_m67_a3_001	shi_01m_m67_a3_001.xlsx_RoiSetAuto-36.zip Distance px	41	9017.25	0.930841	412.99	21.8341	86.9511
	shi_01m_m67_a3_001	shi_01m_m67_a3_001.xlsx_RoiSetAuto-37.zip Distance px	19	4419.21	1.0524	412.99	10.7005	86.9511
	shi_01m_m67_a3_001	shi_01m_m67_a3_001.xlsx_RoiSetAuto-38.zip Distance px	22	6700.72	0.768805	412.99	16.2249	86.9511
	shi_01m_m67_a3_001	shi_01m_m67_a3_001.xlsx_RoiSetAuto-39.zip Distance px	10	4106.62	0.72975	412.99	9.94364	86.9511
	shi_01m_m67_a3_001	shi_01m_m67_a3_001.xlsx_RoiSetAuto-4.zip Distance px	5	6022.77	0.248476	412.99	14.5833	86.9511
	shi_01m_m67_a3_001	shi_01m_m67_a3_001.xlsx_RoiSetAuto-40.zip Distance px	111	7133.77	1.01578	412.99	17.2735	86.9511
	shi_01m_m67_a3_001	shi_01m_m67_a3_001.xlsx_RoiSetAuto-41.zip Distance px	3	3584.3	0.30358	412.99	8.67891	86.9511
	shi_01m_m67_a3_001	shi_01m_m67_a3_001.xlsx_RoiSetAuto-43.zip Distance px	12	4144.36	0.802033	412.99	10.035	86.9511
	shi_01m_m67_a3_001	shi_01m_m67_a3_001.xlsx_RoiSetAuto-48.zip Distance px	3	3215.38	0.187825	412.99	7.78562	86.9511
	shi_01m_m67_a3_001	shi_01m_m67_a3_001.xlsx_RoiSetAuto-5.zip Distance px	50	5377.47	1.16543	412.99	13.0208	86.9511
	shi_01m_m67_a3_001	shi_01m_m67_a3_001.xlsx_RoiSetAuto-50.zip Distance px	12	4829.15	0.454096	412.99	11.6931	86.9511
	shi_01m_m67_a3_001	shi_01m_m67_a3_001.xlsx_RoiSetAuto-51.zip Distance px	105	10639	0.531524	412.99	25.761	86.9511
	shi_01m_m67_a3_001	shi_01m_m67_a3_001.xlsx_RoiSetAuto-52.zip Distance px	12	4173.03	0.601492	412.99	10.1044	86.9511
	shi_01m_m67_a3_001	shi_01m_m67_a3_001.xlsx_RoiSetAuto-55.zip Distance px	36	7011.45	1.11414	412.99	16.9773	86.9511
	shi_01m_m67_a3_001	shi_01m_m67_a3_001.xlsx_RoiSetAuto-56.zip Distance px	90	6127.44	1.02626	412.99	14.8368	86.9511
	shi_01m_m67_a3_001	shi_01m_m67_a3_001.xlsx_RoiSetAuto-6.zip Distance px	20	4459.54	0.656509	412.99	10.7982	86.9511
	shi_01m_m67_a3_001	shi_01m_m67_a3_001.xlsx_RoiSetAuto-62.zip Distance px	4	4313.19	0.180374	412.99	10.4438	86.9511
	shi_01m_m67_a3_001	shi_01m_m67_a3_001.xlsx_RoiSetAuto-63.zip Distance px	3	2695.9	0.179104	412.99	6.52775	86.9511
	shi_01m_m67_a3_001	shi_01m_m67_a3_001.xlsx_RoiSetAuto-65.zip Distance px	19	5038.39	0.659572	412.99	12.1998	86.9511
	shi_01m_m67_a3_001	shi_01m_m67_a3_001.xlsx_RoiSetAuto-66.zip Distance px	4	3395.22	0.397479	412.99	8.22106	86.9511
	shi_01m_m67_a3_001	shi_01m_m67_a3_001.xlsx_RoiSetAuto-67.zip Distance px	3	2818.52	0.32839	412.99	6.82468	86.9511
	shi_01m_m67_a3_001	shi_01m_m67_a3_001.xlsx_RoiSetAuto-69.zip Distance px	55	8767.14	0.701362	412.99	21.2285	86.9511
	shi_01m_m67_a3_001	shi_01m_m67_a3_001.xlsx_RoiSetAuto-7.zip Distance px	37	4352.52	0.702533	412.99	10.5391	86.9511
	shi_01m_m67_a3_001	shi_01m_m67_a3_001.xlsx_RoiSetAuto-72.zip Distance px	14	5181.94	0.404011	412.99	12.5474	86.9511
	shi_01m_m67_a3_001	shi_01m_m67_a3_001.xlsx_RoiSetAuto-75.zip Distance px	21	4329.73	0.605144	412.99	10.4839	86.9511
	shi_01m_m67_a3_001	shi_01m_m67_a3_001.xlsx_RoiSetAuto-76.zip Distance px	15	4675.39	0.626204	412.99	11.3208	86.9511
	shi_01m_m67_a3_001	shi_01m_m67_a3_001.xlsx_RoiSetAuto-79.zip Distance px	5	3598.25	0.611305	412.99	8.71268	86.9511
	shi_01m_m67_a3_001	shi_01m_m67_a3_001.xlsx_RoiSetAuto-80.zip Distance px	3	3939.94	0.232369	412.99	9.54004	86.9511
	shi_01m_m67_a3_001	shi_01m_m67_a3_001.xlsx_RoiSetAuto-81.zip Distance px	7	3862.49	0.364808	412.99	9.3525	86.9511
	shi_01m_m67_a3_001	shi_01m_m67_a3_001.xlsx_RoiSetAuto-84.zip Distance px	3	4200.19	0.395996	412.99	10.1702	86.9511
	shi_01m_m67_a3_001	shi_01m_m67_a3_001.xlsx_RoiSetAuto-85.zip Distance px	8	4395.86	0.412699	412.99	10.644	86.9511
	shi_01m_m67_a3_001	shi_01m_m67_a3_001.xlsx_RoiSetAuto-87.zip Distance px	4	4651.23	0.558698	412.99	11.2623	86.9511
	shi_01m_m67_a3_001	shi_01m_m67_a3_001.xlsx_RoiSetAuto-88.zip Distance px	3	4724.05	0.064279	412.99	11.4386	86.9511
	shi_01m_m67_a3_001	shi_01m_m67_a3_001.xlsx_RoiSetAuto-9.zip Distance px	3	3393.53	0.274621	412.99	8.21698	86.9511
	shi_01m_m67_a3_002	shi_01m_m67_a3_002.xlsx_RoiSetAuto-1.zip Distance px	210	7044.05	0.855847	338.849	20.7882	29.2267
	shi_01m_m67_a3_002	shi_01m_m67_a3_002.xlsx_RoiSetAuto-10.zip Distance px	8	3041.57	0.891395	338.849	8.97619	29.2267
	shi_01m_m67_a3_002	shi_01m_m67_a3_002.xlsx_RoiSetAuto-12.zip Distance px	5	3064.43	0.472722	338.849	9.04367	29.2267
	shi_01m_m67_a3_002	shi_01m_m67_a3_002.xlsx_RoiSetAuto-13.zip Distance px	72	4920.81	0.800145	338.849	14.5221	29.2267
	shi_01m_m67_a3_002	shi_01m_m67_a3_002.xlsx_RoiSetAuto-14.zip Distance px	7	3012.45	0.275745	338.849	8.89024	29.2267
	shi_01m_m67_a3_002	shi_01m_m67_a3_002.xlsx_RoiSetAuto-16.zip Distance px	7	2871.4	0.475198	338.849	8.47398	29.2267
	shi_01m_m67_a3_002	shi_01m_m67_a3_002.xlsx_RoiSetAuto-17.zip Distance px	13	4379.11	0.337655	338.849	12.9235	29.2267
	shi_01m_m67_a3_002	shi_01m_m67_a3_002.xlsx_RoiSetAuto-18.zip Distance px	9	2925.13	0.643844	338.849	8.63257	29.2267
	shi_01m_m67_a3_002	shi_01m_m67_a3_002.xlsx_RoiSetAuto-19.zip Distance px	3	2868.22	0.184327	338.849	8.46462	29.2267
	shi_01m_m67_a3_002	shi_01m_m67_a3_002.xlsx_RoiSetAuto-2.zip Distance px	8	5002.8	0.354349	338.849	14.7641	29.2267
	shi_01m_m67_a3_002	shi_01m_m67_a3_002.xlsx_RoiSetAuto-20.zip Distance px	6	3505.64	0.393319	338.849	10.3457	29.2267
	shi_01m_m67_a3_002	shi_01m_m67_a3_002.xlsx_RoiSetAuto-21.zip Distance px	6	3017.53	0.43181	338.849	8.90525	29.2267
	shi_01m_m67_a3_002	shi_01m_m67_a3_002.xlsx_RoiSetAuto-22.zip Distance px	6	3084.43	0.26398	338.849	9.10268	29.2267
	shi_01m_m67_a3_002	shi_01m_m67_a3_002.xlsx_RoiSetAuto-23.zip Distance px	7	2860.4	0.365749	338.849	8.44152	29.2267
	shi_01m_m67_a3_002	shi_01m_m67_a3_002.xlsx_RoiSetAuto-24.zip Distance px	5	3227.58	0.198953	338.849	9.52513	29.2267
	shi_01m_m67_a3_002	shi_01m_m67_a3_002.xlsx_RoiSetAuto-25.zip Distance px	32	4643.47	0.601318	338.849	13.7037	29.2267
	shi_01m_m67_a3_002	shi_01m_m67_a3_002.xlsx_RoiSetAuto-26.zip Distance px	36	3508.71	0.6605	338.849	10.3548	29.2267
	shi_01m_m67_a3_002	shi_01m_m67_a3_002.xlsx_RoiSetAuto-27.zip Distance px	4	4014.11	0.232701	338.849	11.8463	29.2267
	shi_01m_m67_a3_002	shi_01m_m67_a3_002.xlsx_RoiSetAuto-28.zip Distance px	6	3818.75	0.602737	338.849	11.2698	29.2267
	shi_01m_m67_a3_002	shi_01m_m67_a3_002.xlsx_RoiSetAuto-29.zip Distance px	3	3520.87	0.379469	338.849	10.3907	29.2267
	shi_01m_m67_a3_002	shi_01m_m67_a3_002.xlsx_RoiSetAuto-3.zip Distance px	30	2898.09	0.50946	338.849	8.55277	29.2267
	shi_01m_m67_a3_002	shi_01m_m67_a3_002.xlsx_RoiSetAuto-30.zip Distance px	3	3350	0.407932	338.849	9.88642	29.2267
	shi_01m_m67_a3_002	shi_01m_m67_a3_002.xlsx_RoiSetAuto-31.zip Distance px	8	4422.09	0.460104	338.849	13.0503	29.2267
	shi_01m_m67_a3_002	shi_01m_m67_a3_002.xlsx_RoiSetAuto-32.zip Distance px	8	3315.32	0.520217	338.849	9.78407	29.2267
	shi_01m_m67_a3_002	shi_01m_m67_a3_002.xlsx_RoiSetAuto-33.zip Distance px	3	3183.87	0.122578	338.849	9.39615	29.2267
	shi_01m_m67_a3_002	shi_01m_m67_a3_002.xlsx_RoiSetAuto-34.zip Distance px	20	4095.87	0.787384	338.849	12.0876	29.2267
	shi_01m_m67_a3_002	shi_01m_m67_a3_002.xlsx_RoiSetAuto-35.zip Distance px	4	3548.51	0.40985	338.849	10.4723	29.2267
	shi_01m_m67_a3_002	shi_01m_m67_a3_002.xlsx_RoiSetAuto-36.zip Distance px	26	5529.98	0.466513	338.849	16.3199	29.2267
	shi_01m_m67_a3_002	shi_01m_m67_a3_002.xlsx_RoiSetAuto-37.zip Distance px	8	4695.28	0.794345	338.849	13.8566	29.2267
	shi_01m_m67_a3_002	shi_01m_m67_a3_002.xlsx_RoiSetAuto-38.zip Distance px	4	3973.24	0.300823	338.849	11.7257	29.2267
	shi_01m_m67_a3_002	shi_01m_m67_a3_002.xlsx_RoiSetAuto-39.zip Distance px	9	4088.33	0.498709	338.849	12.0654	29.2267
	shi_01m_m67_a3_002	shi_01m_m67_a3_002.xlsx_RoiSetAuto-5.zip Distance px	12	3416.43	0.564379	338.849	10.0825	29.2267
	shi_01m_m67_a3_002	shi_01m_m67_a3_002.xlsx_RoiSetAuto-6.zip Distance px	14	3843.54	0.498056	338.849	11.3429	29.2267
	shi_01m_m67_a3_002	shi_01m_m67_a3_002.xlsx_RoiSetAuto-7.zip Distance px	196	4723.64	1.0075	338.849	13.9403	29.2267
	shi_01m_m67_a3_002	shi_01m_m67_a3_002.xlsx_RoiSetAuto-8.zip Distance px	19	4092.62	0.914402	338.849	12.078	29.2267
	shi_01m_m67_a3_002	shi_01m_m67_a3_002.xlsx_RoiSetAuto-9.zip Distance px	17	2996.27	0.663113	338.849	8.84252	29.2267
	shi_01m_m67_a3_003	shi_01m_m67_a3_003.xlsx_RoiSetAuto-1.zip Distance px	34	4731.72	0.612861	253.177	18.6894	59.4311
	shi_01m_m67_a3_003	shi_01m_m67_a3_003.xlsx_RoiSetAuto-10.zip Distance px	17	2854.79	0.532293	253.177	11.2759	59.4311
	shi_01m_m67_a3_003	shi_01m_m67_a3_003.xlsx_RoiSetAuto-12.zip Distance px	19	4059.11	0.912004	253.177	16.0327	59.4311
	shi_01m_m67_a3_003	shi_01m_m67_a3_003.xlsx_RoiSetAuto-14.zip Distance px	13	2595.99	0.599706	253.177	10.2537	59.4311
	shi_01m_m67_a3_003	shi_01m_m67_a3_003.xlsx_RoiSetAuto-15.zip Distance px	11	3202.93	0.905348	253.177	12.651	59.4311
	shi_01m_m67_a3_003	shi_01m_m67_a3_003.xlsx_RoiSetAuto-16.zip Distance px	4	1696.9	0.235373	253.177	6.70243	59.4311
	shi_01m_m67_a3_003	shi_01m_m67_a3_003.xlsx_RoiSetAuto-17.zip Distance px	22	3566.4	0.54175	253.177	14.0866	59.4311
	shi_01m_m67_a3_003	shi_01m_m67_a3_003.xlsx_RoiSetAuto-2.zip Distance px	48	4192.9	1.03819	253.177	16.5612	59.4311
	shi_01m_m67_a3_003	shi_01m_m67_a3_003.xlsx_RoiSetAuto-20.zip Distance px	5	1850.84	0.337793	253.177	7.31047	59.4311
	shi_01m_m67_a3_003	shi_01m_m67_a3_003.xlsx_RoiSetAuto-21.zip Distance px	16	2282.6	0.65555	253.177	9.01584	59.4311
	shi_01m_m67_a3_003	shi_01m_m67_a3_003.xlsx_RoiSetAuto-23.zip Distance px	67	3175.7	0.953844	253.177	12.5434	59.4311
	shi_01m_m67_a3_003	shi_01m_m67_a3_003.xlsx_RoiSetAuto-24.zip Distance px	32	3711.71	0.801277	253.177	14.6606	59.4311
	shi_01m_m67_a3_003	shi_01m_m67_a3_003.xlsx_RoiSetAuto-25.zip Distance px	102	3608.74	1.17989	253.177	14.2538	59.4311
	shi_01m_m67_a3_003	shi_01m_m67_a3_003.xlsx_RoiSetAuto-26.zip Distance px	15	2958.54	0.802762	253.177	11.6857	59.4311
	shi_01m_m67_a3_003	shi_01m_m67_a3_003.xlsx_RoiSetAuto-27.zip Distance px	3	1881.75	0.253694	253.177	7.43255	59.4311
	shi_01m_m67_a3_003	shi_01m_m67_a3_003.xlsx_RoiSetAuto-28.zip Distance px	15	2062.68	0.516849	253.177	8.14719	59.4311
	shi_01m_m67_a3_003	shi_01m_m67_a3_003.xlsx_RoiSetAuto-29.zip Distance px	9	1941.12	0.687404	253.177	7.66707	59.4311
	shi_01m_m67_a3_003	shi_01m_m67_a3_003.xlsx_RoiSetAuto-3.zip Distance px	5	2626.2	0.377831	253.177	10.373	59.4311
	shi_01m_m67_a3_003	shi_01m_m67_a3_003.xlsx_RoiSetAuto-30.zip Distance px	6	2156.09	0.648076	253.177	8.51615	59.4311
	shi_01m_m67_a3_003	shi_01m_m67_a3_003.xlsx_RoiSetAuto-31.zip Distance px	5	2040.13	0.648383	253.177	8.05814	59.4311
	shi_01m_m67_a3_003	shi_01m_m67_a3_003.xlsx_RoiSetAuto-32.zip Distance px	25	2748.48	0.769772	253.177	10.856	59.4311
	shi_01m_m67_a3_003	shi_01m_m67_a3_003.xlsx_RoiSetAuto-33.zip Distance px	15	2576.05	0.728116	253.177	10.1749	59.4311
	shi_01m_m67_a3_003	shi_01m_m67_a3_003.xlsx_RoiSetAuto-34.zip Distance px	5	1971.98	0.450246	253.177	7.78894	59.4311
	shi_01m_m67_a3_003	shi_01m_m67_a3_003.xlsx_RoiSetAuto-35.zip Distance px	3	2113.61	0.36665	253.177	8.34836	59.4311
	shi_01m_m67_a3_003	shi_01m_m67_a3_003.xlsx_RoiSetAuto-36.zip Distance px	5	1795.17	0.542141	253.177	7.09056	59.4311
	shi_01m_m67_a3_003	shi_01m_m67_a3_003.xlsx_RoiSetAuto-37.zip Distance px	6	1921.29	0.414126	253.177	7.58873	59.4311
	shi_01m_m67_a3_003	shi_01m_m67_a3_003.xlsx_RoiSetAuto-38.zip Distance px	9	2566.82	0.682371	253.177	10.1384	59.4311
	shi_01m_m67_a3_003	shi_01m_m67_a3_003.xlsx_RoiSetAuto-39.zip Distance px	40	3836.27	1.3401	253.177	15.1525	59.4311
	shi_01m_m67_a3_003	shi_01m_m67_a3_003.xlsx_RoiSetAuto-4.zip Distance px	52	5651.14	0.94212	253.177	22.3209	59.4311
	shi_01m_m67_a3_003	shi_01m_m67_a3_003.xlsx_RoiSetAuto-40.zip Distance px	23	2672.71	0.785649	253.177	10.5567	59.4311
	shi_01m_m67_a3_003	shi_01m_m67_a3_003.xlsx_RoiSetAuto-41.zip Distance px	4	1958.35	0.426593	253.177	7.7351	59.4311
	shi_01m_m67_a3_003	shi_01m_m67_a3_003.xlsx_RoiSetAuto-43.zip Distance px	10	2616.79	0.828333	253.177	10.3358	59.4311
	shi_01m_m67_a3_003	shi_01m_m67_a3_003.xlsx_RoiSetAuto-44.zip Distance px	4	2911.5	0.675925	253.177	11.4999	59.4311
	shi_01m_m67_a3_003	shi_01m_m67_a3_003.xlsx_RoiSetAuto-45.zip Distance px	3	2566.8	0.628735	253.177	10.1384	59.4311
	shi_01m_m67_a3_003	shi_01m_m67_a3_003.xlsx_RoiSetAuto-46.zip Distance px	5	2265.73	0.51274	253.177	8.9492	59.4311
	shi_01m_m67_a3_003	shi_01m_m67_a3_003.xlsx_RoiSetAuto-47.zip Distance px	5	3741.57	0.795857	253.177	14.7785	59.4311
	shi_01m_m67_a3_003	shi_01m_m67_a3_003.xlsx_RoiSetAuto-48.zip Distance px	17	2168	0.725109	253.177	8.5632	59.4311
	shi_01m_m67_a3_003	shi_01m_m67_a3_003.xlsx_RoiSetAuto-49.zip Distance px	5	2625.46	0.318644	253.177	10.3701	59.4311
	shi_01m_m67_a3_003	shi_01m_m67_a3_003.xlsx_RoiSetAuto-5.zip Distance px	69	3972.12	1.22298	253.177	15.6891	59.4311
	shi_01m_m67_a3_003	shi_01m_m67_a3_003.xlsx_RoiSetAuto-50.zip Distance px	4	1971.18	0.243337	253.177	7.78578	59.4311
	shi_01m_m67_a3_003	shi_01m_m67_a3_003.xlsx_RoiSetAuto-51.zip Distance px	63	4433.65	0.9689	253.177	17.5121	59.4311
	shi_01m_m67_a3_003	shi_01m_m67_a3_003.xlsx_RoiSetAuto-53.zip Distance px	3	1936.32	0.698648	253.177	7.64808	59.4311
	shi_01m_m67_a3_003	shi_01m_m67_a3_003.xlsx_RoiSetAuto-56.zip Distance px	52	4194.56	0.856156	253.177	16.5677	59.4311
	shi_01m_m67_a3_003	shi_01m_m67_a3_003.xlsx_RoiSetAuto-58.zip Distance px	6	1731.41	0.496928	253.177	6.83875	59.4311
	shi_01m_m67_a3_003	shi_01m_m67_a3_003.xlsx_RoiSetAuto-59.zip Distance px	8	2278.15	0.855471	253.177	8.99825	59.4311
	shi_01m_m67_a3_003	shi_01m_m67_a3_003.xlsx_RoiSetAuto-6.zip Distance px	3	2078.52	0.638618	253.177	8.20975	59.4311
	shi_01m_m67_a3_003	shi_01m_m67_a3_003.xlsx_RoiSetAuto-61.zip Distance px	3	2700.64	0.81016	253.177	10.667	59.4311
	shi_01m_m67_a3_003	shi_01m_m67_a3_003.xlsx_RoiSetAuto-62.zip Distance px	11	2230.4	0.536065	253.177	8.80964	59.4311
	shi_01m_m67_a3_003	shi_01m_m67_a3_003.xlsx_RoiSetAuto-65.zip Distance px	9	2470.39	0.751516	253.177	9.75758	59.4311
	shi_01m_m67_a3_003	shi_01m_m67_a3_003.xlsx_RoiSetAuto-66.zip Distance px	12	1986.74	0.696132	253.177	7.84723	59.4311
	shi_01m_m67_a3_003	shi_01m_m67_a3_003.xlsx_RoiSetAuto-70.zip Distance px	8	2853.96	0.54365	253.177	11.2726	59.4311
	shi_01m_m67_a3_003	shi_01m_m67_a3_003.xlsx_RoiSetAuto-71.zip Distance px	4	3263.86	0.826117	253.177	12.8916	59.4311
	shi_01m_m67_a3_003	shi_01m_m67_a3_003.xlsx_RoiSetAuto-8.zip Distance px	29	3089.86	1.00592	253.177	12.2043	59.4311
	shi_01m_m67_a3_003	shi_01m_m67_a3_003.xlsx_RoiSetAuto-9.zip Distance px	32	4881.01	0.711481	253.177	19.2791	59.4311
	shi_02m_m67_a3_001	shi_02m_m67_a3_001.xlsx_RoiSetAuto-10.zip Distance px	7	2110.26	0.191461	303.434	6.95461	121.618
	shi_02m_m67_a3_001	shi_02m_m67_a3_001.xlsx_RoiSetAuto-11.zip Distance px	9	2730.76	0.326493	303.434	8.99952	121.618
	shi_02m_m67_a3_001	shi_02m_m67_a3_001.xlsx_RoiSetAuto-13.zip Distance px	44	3628.36	0.588254	303.434	11.9577	121.618
	shi_02m_m67_a3_001	shi_02m_m67_a3_001.xlsx_RoiSetAuto-14.zip Distance px	3	2290.84	0.245662	303.434	7.54972	121.618
	shi_02m_m67_a3_001	shi_02m_m67_a3_001.xlsx_RoiSetAuto-15.zip Distance px	12	2477.28	0.355412	303.434	8.16414	121.618
	shi_02m_m67_a3_001	shi_02m_m67_a3_001.xlsx_RoiSetAuto-16.zip Distance px	5	2549.37	0.231223	303.434	8.40174	121.618
	shi_02m_m67_a3_001	shi_02m_m67_a3_001.xlsx_RoiSetAuto-18.zip Distance px	5	2297.2	0.143675	303.434	7.57069	121.618
	shi_02m_m67_a3_001	shi_02m_m67_a3_001.xlsx_RoiSetAuto-19.zip Distance px	12	2622.44	0.402448	303.434	8.64254	121.618
	shi_02m_m67_a3_001	shi_02m_m67_a3_001.xlsx_RoiSetAuto-2.zip Distance px	210	6656.42	1.12255	303.434	21.937	121.618
	shi_02m_m67_a3_001	shi_02m_m67_a3_001.xlsx_RoiSetAuto-20.zip Distance px	4	2195.66	0.358408	303.434	7.23603	121.618
	shi_02m_m67_a3_001	shi_02m_m67_a3_001.xlsx_RoiSetAuto-21.zip Distance px	10	2442.38	0.500798	303.434	8.04911	121.618
	shi_02m_m67_a3_001	shi_02m_m67_a3_001.xlsx_RoiSetAuto-22.zip Distance px	3	2550.69	0.242521	303.434	8.40609	121.618
	shi_02m_m67_a3_001	shi_02m_m67_a3_001.xlsx_RoiSetAuto-23.zip Distance px	18	2393.51	0.568475	303.434	7.88806	121.618
	shi_02m_m67_a3_001	shi_02m_m67_a3_001.xlsx_RoiSetAuto-24.zip Distance px	10	2263.42	0.355065	303.434	7.45936	121.618
	shi_02m_m67_a3_001	shi_02m_m67_a3_001.xlsx_RoiSetAuto-26.zip Distance px	5	2148.14	0.298549	303.434	7.07945	121.618
	shi_02m_m67_a3_001	shi_02m_m67_a3_001.xlsx_RoiSetAuto-27.zip Distance px	3	2292.31	0.160293	303.434	7.55455	121.618
	shi_02m_m67_a3_001	shi_02m_m67_a3_001.xlsx_RoiSetAuto-28.zip Distance px	29	2699.34	0.465016	303.434	8.89595	121.618
	shi_02m_m67_a3_001	shi_02m_m67_a3_001.xlsx_RoiSetAuto-29.zip Distance px	49	3157.24	0.58153	303.434	10.405	121.618
	shi_02m_m67_a3_001	shi_02m_m67_a3_001.xlsx_RoiSetAuto-3.zip Distance px	8	3966.99	0.659058	303.434	13.0737	121.618
	shi_02m_m67_a3_001	shi_02m_m67_a3_001.xlsx_RoiSetAuto-30.zip Distance px	15	3822.49	0.658474	303.434	12.5974	121.618
	shi_02m_m67_a3_001	shi_02m_m67_a3_001.xlsx_RoiSetAuto-31.zip Distance px	3	2412.55	0.434928	303.434	7.95084	121.618
	shi_02m_m67_a3_001	shi_02m_m67_a3_001.xlsx_RoiSetAuto-32.zip Distance px	8	2180.79	0.382824	303.434	7.18704	121.618
	shi_02m_m67_a3_001	shi_02m_m67_a3_001.xlsx_RoiSetAuto-33.zip Distance px	3	2184.82	0.101819	303.434	7.20032	121.618
	shi_02m_m67_a3_001	shi_02m_m67_a3_001.xlsx_RoiSetAuto-34.zip Distance px	6	2403.65	0.444174	303.434	7.9215	121.618
	shi_02m_m67_a3_001	shi_02m_m67_a3_001.xlsx_RoiSetAuto-35.zip Distance px	3	1984.51	0.276944	303.434	6.54017	121.618
	shi_02m_m67_a3_001	shi_02m_m67_a3_001.xlsx_RoiSetAuto-36.zip Distance px	3	1910.5	0.177652	303.434	6.29626	121.618
	shi_02m_m67_a3_001	shi_02m_m67_a3_001.xlsx_RoiSetAuto-37.zip Distance px	9	2391.67	0.488917	303.434	7.88201	121.618
	shi_02m_m67_a3_001	shi_02m_m67_a3_001.xlsx_RoiSetAuto-38.zip Distance px	3	2264.34	0.407986	303.434	7.46237	121.618
	shi_02m_m67_a3_001	shi_02m_m67_a3_001.xlsx_RoiSetAuto-39.zip Distance px	7	2010.42	0.328033	303.434	6.62557	121.618
	shi_02m_m67_a3_001	shi_02m_m67_a3_001.xlsx_RoiSetAuto-4.zip Distance px	43	3254.48	0.774599	303.434	10.7255	121.618
	shi_02m_m67_a3_001	shi_02m_m67_a3_001.xlsx_RoiSetAuto-40.zip Distance px	3	1766.45	0.249807	303.434	5.82152	121.618
	shi_02m_m67_a3_001	shi_02m_m67_a3_001.xlsx_RoiSetAuto-41.zip Distance px	4	2026.01	0.367709	303.434	6.67692	121.618
	shi_02m_m67_a3_001	shi_02m_m67_a3_001.xlsx_RoiSetAuto-43.zip Distance px	3	2266.44	0.807538	303.434	7.4693	121.618
	shi_02m_m67_a3_001	shi_02m_m67_a3_001.xlsx_RoiSetAuto-44.zip Distance px	9	2654.22	0.656656	303.434	8.74728	121.618
	shi_02m_m67_a3_001	shi_02m_m67_a3_001.xlsx_RoiSetAuto-45.zip Distance px	102	2742.13	0.987559	303.434	9.037	121.618
	shi_02m_m67_a3_001	shi_02m_m67_a3_001.xlsx_RoiSetAuto-46.zip Distance px	3	1669.92	0.127913	303.434	5.50339	121.618
	shi_02m_m67_a3_001	shi_02m_m67_a3_001.xlsx_RoiSetAuto-47.zip Distance px	8	1917.65	0.498968	303.434	6.31983	121.618
	shi_02m_m67_a3_001	shi_02m_m67_a3_001.xlsx_RoiSetAuto-48.zip Distance px	3	1895.1	0.13335	303.434	6.24551	121.618
	shi_02m_m67_a3_001	shi_02m_m67_a3_001.xlsx_RoiSetAuto-49.zip Distance px	34	3212	0.572717	303.434	10.5855	121.618
	shi_02m_m67_a3_001	shi_02m_m67_a3_001.xlsx_RoiSetAuto-50.zip Distance px	3	1943.32	0.123422	303.434	6.40442	121.618
	shi_02m_m67_a3_001	shi_02m_m67_a3_001.xlsx_RoiSetAuto-51.zip Distance px	3	1920.93	0.170653	303.434	6.33065	121.618
	shi_02m_m67_a3_001	shi_02m_m67_a3_001.xlsx_RoiSetAuto-52.zip Distance px	3	1979.34	0.278321	303.434	6.52313	121.618
	shi_02m_m67_a3_001	shi_02m_m67_a3_001.xlsx_RoiSetAuto-53.zip Distance px	5	2158.3	0.424556	303.434	7.11292	121.618
	shi_02m_m67_a3_001	shi_02m_m67_a3_001.xlsx_RoiSetAuto-54.zip Distance px	6	1716.3	0.313076	303.434	5.65625	121.618
	shi_02m_m67_a3_001	shi_02m_m67_a3_001.xlsx_RoiSetAuto-55.zip Distance px	18	2068.57	0.551041	303.434	6.81722	121.618
	shi_02m_m67_a3_001	shi_02m_m67_a3_001.xlsx_RoiSetAuto-56.zip Distance px	5	2206.43	0.571184	303.434	7.27153	121.618
	shi_02m_m67_a3_001	shi_02m_m67_a3_001.xlsx_RoiSetAuto-57.zip Distance px	3	1989.29	0.433656	303.434	6.55591	121.618
	shi_02m_m67_a3_001	shi_02m_m67_a3_001.xlsx_RoiSetAuto-58.zip Distance px	5	2043.01	0.367207	303.434	6.73296	121.618
	shi_02m_m67_a3_001	shi_02m_m67_a3_001.xlsx_RoiSetAuto-59.zip Distance px	12	2437.74	0.507055	303.434	8.03382	121.618
	shi_02m_m67_a3_001	shi_02m_m67_a3_001.xlsx_RoiSetAuto-6.zip Distance px	210	4988.1	0.939662	303.434	16.4388	121.618
	shi_02m_m67_a3_001	shi_02m_m67_a3_001.xlsx_RoiSetAuto-60.zip Distance px	3	2143.51	0.443084	303.434	7.06416	121.618
	shi_02m_m67_a3_001	shi_02m_m67_a3_001.xlsx_RoiSetAuto-62.zip Distance px	4	1907.8	0.290523	303.434	6.28736	121.618
	shi_02m_m67_a3_001	shi_02m_m67_a3_001.xlsx_RoiSetAuto-63.zip Distance px	4	2966.45	0.416679	303.434	9.77625	121.618
	shi_02m_m67_a3_001	shi_02m_m67_a3_001.xlsx_RoiSetAuto-64.zip Distance px	3	1793.88	0.140075	303.434	5.91193	121.618
	shi_02m_m67_a3_001	shi_02m_m67_a3_001.xlsx_RoiSetAuto-8.zip Distance px	208	3463.66	0.783454	303.434	11.4149	121.618
	shi_02m_m67_a3_001	shi_02m_m67_a3_001.xlsx_RoiSetAuto-9.zip Distance px	3	2616.91	0.477935	303.434	8.6243	121.618
	shi_02m_m67_a3_003	shi_02m_m67_a3_003.xlsx_RoiSetAuto-1.zip Distance px	5	1773.27	0.349803	221.696	7.99868	48.2667
	shi_02m_m67_a3_003	shi_02m_m67_a3_003.xlsx_RoiSetAuto-10.zip Distance px	4	1635.57	0.092998	221.696	7.37754	48.2667
	shi_02m_m67_a3_003	shi_02m_m67_a3_003.xlsx_RoiSetAuto-11.zip Distance px	10	1814.54	0.653125	221.696	8.18481	48.2667
	shi_02m_m67_a3_003	shi_02m_m67_a3_003.xlsx_RoiSetAuto-12.zip Distance px	36	2167.59	0.990463	221.696	9.7773	48.2667
	shi_02m_m67_a3_003	shi_02m_m67_a3_003.xlsx_RoiSetAuto-13.zip Distance px	7	1627.1	0.398067	221.696	7.33935	48.2667
	shi_02m_m67_a3_003	shi_02m_m67_a3_003.xlsx_RoiSetAuto-14.zip Distance px	13	1807.35	0.462707	221.696	8.15238	48.2667
	shi_02m_m67_a3_003	shi_02m_m67_a3_003.xlsx_RoiSetAuto-16.zip Distance px	8	1936.6	0.346809	221.696	8.73538	48.2667
	shi_02m_m67_a3_003	shi_02m_m67_a3_003.xlsx_RoiSetAuto-18.zip Distance px	4	1831.75	0.506281	221.696	8.26246	48.2667
	shi_02m_m67_a3_003	shi_02m_m67_a3_003.xlsx_RoiSetAuto-2.zip Distance px	3	1747.73	0.166905	221.696	7.88345	48.2667
	shi_02m_m67_a3_003	shi_02m_m67_a3_003.xlsx_RoiSetAuto-21.zip Distance px	10	2085.17	0.577441	221.696	9.40555	48.2667
	shi_02m_m67_a3_003	shi_02m_m67_a3_003.xlsx_RoiSetAuto-22.zip Distance px	3	1726.01	0.463532	221.696	7.78547	48.2667
	shi_02m_m67_a3_003	shi_02m_m67_a3_003.xlsx_RoiSetAuto-23.zip Distance px	4	1735.4	0.396596	221.696	7.82784	48.2667
	shi_02m_m67_a3_003	shi_02m_m67_a3_003.xlsx_RoiSetAuto-24.zip Distance px	7	1651.21	0.659959	221.696	7.44811	48.2667
	shi_02m_m67_a3_003	shi_02m_m67_a3_003.xlsx_RoiSetAuto-3.zip Distance px	3	1634.11	0.221402	221.696	7.37094	48.2667
	shi_02m_m67_a3_003	shi_02m_m67_a3_003.xlsx_RoiSetAuto-4.zip Distance px	3	1802.15	0.454705	221.696	8.12891	48.2667
	shi_02m_m67_a3_003	shi_02m_m67_a3_003.xlsx_RoiSetAuto-5.zip Distance px	12	1752.28	0.713143	221.696	7.90397	48.2667
	shi_02m_m67_a3_003	shi_02m_m67_a3_003.xlsx_RoiSetAuto-6.zip Distance px	3	1570.93	0.275856	221.696	7.08599	48.2667
	shi_02m_m67_a3_003	shi_02m_m67_a3_003.xlsx_RoiSetAuto-9.zip Distance px	13	1657.16	0.60761	221.696	7.47494	48.2667
	shi_03m_m67_a3_001	shi_03m_m67_a3_001.xlsx_RoiSetAuto-1.zip Distance px	19	3345.28	0.734584	279.531	11.9675	103.893
	shi_03m_m67_a3_001	shi_03m_m67_a3_001.xlsx_RoiSetAuto-10.zip Distance px	4	2095.34	0.368936	279.531	7.49591	103.893
	shi_03m_m67_a3_001	shi_03m_m67_a3_001.xlsx_RoiSetAuto-101.zip Distance px	5	2098.15	0.416951	279.531	7.50596	103.893
	shi_03m_m67_a3_001	shi_03m_m67_a3_001.xlsx_RoiSetAuto-102.zip Distance px	53	3493.36	0.838198	279.531	12.4972	103.893
	shi_03m_m67_a3_001	shi_03m_m67_a3_001.xlsx_RoiSetAuto-103.zip Distance px	12	2341.69	0.658754	279.531	8.37723	103.893
	shi_03m_m67_a3_001	shi_03m_m67_a3_001.xlsx_RoiSetAuto-104.zip Distance px	6	1921.65	0.230684	279.531	6.87457	103.893
	shi_03m_m67_a3_001	shi_03m_m67_a3_001.xlsx_RoiSetAuto-105.zip Distance px	5	1554.04	0.461431	279.531	5.55945	103.893
	shi_03m_m67_a3_001	shi_03m_m67_a3_001.xlsx_RoiSetAuto-106.zip Distance px	44	3614.1	0.922648	279.531	12.9292	103.893
	shi_03m_m67_a3_001	shi_03m_m67_a3_001.xlsx_RoiSetAuto-107.zip Distance px	3	2069.76	0.548659	279.531	7.4044	103.893
	shi_03m_m67_a3_001	shi_03m_m67_a3_001.xlsx_RoiSetAuto-108.zip Distance px	5	2004.76	0.486321	279.531	7.17189	103.893
	shi_03m_m67_a3_001	shi_03m_m67_a3_001.xlsx_RoiSetAuto-109.zip Distance px	4	1906.31	0.634523	279.531	6.81969	103.893
	shi_03m_m67_a3_001	shi_03m_m67_a3_001.xlsx_RoiSetAuto-11.zip Distance px	26	3315.36	0.819513	279.531	11.8605	103.893
	shi_03m_m67_a3_001	shi_03m_m67_a3_001.xlsx_RoiSetAuto-110.zip Distance px	4	1619.38	0.171422	279.531	5.79322	103.893
	shi_03m_m67_a3_001	shi_03m_m67_a3_001.xlsx_RoiSetAuto-111.zip Distance px	6	1831.84	0.547968	279.531	6.55326	103.893
	shi_03m_m67_a3_001	shi_03m_m67_a3_001.xlsx_RoiSetAuto-113.zip Distance px	10	2350.18	0.713987	279.531	8.40761	103.893
	shi_03m_m67_a3_001	shi_03m_m67_a3_001.xlsx_RoiSetAuto-114.zip Distance px	23	2569.77	0.757356	279.531	9.19317	103.893
	shi_03m_m67_a3_001	shi_03m_m67_a3_001.xlsx_RoiSetAuto-115.zip Distance px	4	1715.57	0.333077	279.531	6.13731	103.893
	shi_03m_m67_a3_001	shi_03m_m67_a3_001.xlsx_RoiSetAuto-116.zip Distance px	3	1784.72	0.11908	279.531	6.38469	103.893
	shi_03m_m67_a3_001	shi_03m_m67_a3_001.xlsx_RoiSetAuto-117.zip Distance px	4	1848.04	0.529083	279.531	6.61124	103.893
	shi_03m_m67_a3_001	shi_03m_m67_a3_001.xlsx_RoiSetAuto-118.zip Distance px	5	1994.06	0.247152	279.531	7.13359	103.893
	shi_03m_m67_a3_001	shi_03m_m67_a3_001.xlsx_RoiSetAuto-119.zip Distance px	7	2482.45	0.606671	279.531	8.8808	103.893
	shi_03m_m67_a3_001	shi_03m_m67_a3_001.xlsx_RoiSetAuto-12.zip Distance px	27	3420.92	1.07693	279.531	12.2381	103.893
	shi_03m_m67_a3_001	shi_03m_m67_a3_001.xlsx_RoiSetAuto-120.zip Distance px	6	2068.19	0.668924	279.531	7.39881	103.893
	shi_03m_m67_a3_001	shi_03m_m67_a3_001.xlsx_RoiSetAuto-121.zip Distance px	19	2110.43	1.0687	279.531	7.54991	103.893
	shi_03m_m67_a3_001	shi_03m_m67_a3_001.xlsx_RoiSetAuto-122.zip Distance px	4	1813.03	0.634867	279.531	6.48597	103.893
	shi_03m_m67_a3_001	shi_03m_m67_a3_001.xlsx_RoiSetAuto-124.zip Distance px	3	1536.4	0.429946	279.531	5.49635	103.893
	shi_03m_m67_a3_001	shi_03m_m67_a3_001.xlsx_RoiSetAuto-125.zip Distance px	16	2419.42	0.959538	279.531	8.6553	103.893
	shi_03m_m67_a3_001	shi_03m_m67_a3_001.xlsx_RoiSetAuto-126.zip Distance px	4	2060.19	0.483372	279.531	7.37018	103.893
	shi_03m_m67_a3_001	shi_03m_m67_a3_001.xlsx_RoiSetAuto-127.zip Distance px	7	2267.92	0.627632	279.531	8.1133	103.893
	shi_03m_m67_a3_001	shi_03m_m67_a3_001.xlsx_RoiSetAuto-128.zip Distance px	3	2150.5	0.335057	279.531	7.69327	103.893
	shi_03m_m67_a3_001	shi_03m_m67_a3_001.xlsx_RoiSetAuto-13.zip Distance px	4	2294.69	0.525719	279.531	8.20907	103.893
	shi_03m_m67_a3_001	shi_03m_m67_a3_001.xlsx_RoiSetAuto-130.zip Distance px	3	2002.74	0.575931	279.531	7.16465	103.893
	shi_03m_m67_a3_001	shi_03m_m67_a3_001.xlsx_RoiSetAuto-131.zip Distance px	11	2278.65	0.769398	279.531	8.1517	103.893
	shi_03m_m67_a3_001	shi_03m_m67_a3_001.xlsx_RoiSetAuto-132.zip Distance px	14	2743.36	0.890511	279.531	9.81418	103.893
	shi_03m_m67_a3_001	shi_03m_m67_a3_001.xlsx_RoiSetAuto-133.zip Distance px	6	1796.01	0.390883	279.531	6.42509	103.893
	shi_03m_m67_a3_001	shi_03m_m67_a3_001.xlsx_RoiSetAuto-134.zip Distance px	9	1885.62	0.66563	279.531	6.74565	103.893
	shi_03m_m67_a3_001	shi_03m_m67_a3_001.xlsx_RoiSetAuto-136.zip Distance px	4	1813.06	0.350971	279.531	6.48607	103.893
	shi_03m_m67_a3_001	shi_03m_m67_a3_001.xlsx_RoiSetAuto-137.zip Distance px	11	2449.54	0.490875	279.531	8.76304	103.893
	shi_03m_m67_a3_001	shi_03m_m67_a3_001.xlsx_RoiSetAuto-138.zip Distance px	4	1956.5	0.448303	279.531	6.99922	103.893
	shi_03m_m67_a3_001	shi_03m_m67_a3_001.xlsx_RoiSetAuto-139.zip Distance px	6	2474.74	0.716123	279.531	8.85319	103.893
	shi_03m_m67_a3_001	shi_03m_m67_a3_001.xlsx_RoiSetAuto-140.zip Distance px	6	3306.65	0.312333	279.531	11.8293	103.893
	shi_03m_m67_a3_001	shi_03m_m67_a3_001.xlsx_RoiSetAuto-15.zip Distance px	5	1769.09	0.176788	279.531	6.32878	103.893
	shi_03m_m67_a3_001	shi_03m_m67_a3_001.xlsx_RoiSetAuto-16.zip Distance px	39	3184.96	1.18688	279.531	11.394	103.893
	shi_03m_m67_a3_001	shi_03m_m67_a3_001.xlsx_RoiSetAuto-17.zip Distance px	12	2774.09	0.556573	279.531	9.92412	103.893
	shi_03m_m67_a3_001	shi_03m_m67_a3_001.xlsx_RoiSetAuto-19.zip Distance px	7	2155.32	0.309548	279.531	7.71052	103.893
	shi_03m_m67_a3_001	shi_03m_m67_a3_001.xlsx_RoiSetAuto-2.zip Distance px	7	2191.57	0.358634	279.531	7.84018	103.893
	shi_03m_m67_a3_001	shi_03m_m67_a3_001.xlsx_RoiSetAuto-20.zip Distance px	4	2462.99	0.392938	279.531	8.81117	103.893
	shi_03m_m67_a3_001	shi_03m_m67_a3_001.xlsx_RoiSetAuto-21.zip Distance px	83	3585.75	1.18441	279.531	12.8277	103.893
	shi_03m_m67_a3_001	shi_03m_m67_a3_001.xlsx_RoiSetAuto-23.zip Distance px	35	2656.78	1.04766	279.531	9.50445	103.893
	shi_03m_m67_a3_001	shi_03m_m67_a3_001.xlsx_RoiSetAuto-24.zip Distance px	5	2418.68	0.318082	279.531	8.65263	103.893
	shi_03m_m67_a3_001	shi_03m_m67_a3_001.xlsx_RoiSetAuto-25.zip Distance px	3	1963.43	0.138145	279.531	7.02402	103.893
	shi_03m_m67_a3_001	shi_03m_m67_a3_001.xlsx_RoiSetAuto-26.zip Distance px	3	2810.64	0.253017	279.531	10.0549	103.893
	shi_03m_m67_a3_001	shi_03m_m67_a3_001.xlsx_RoiSetAuto-27.zip Distance px	34	3944.25	0.794893	279.531	14.1103	103.893
	shi_03m_m67_a3_001	shi_03m_m67_a3_001.xlsx_RoiSetAuto-28.zip Distance px	24	2995.38	0.971987	279.531	10.7157	103.893
	shi_03m_m67_a3_001	shi_03m_m67_a3_001.xlsx_RoiSetAuto-29.zip Distance px	5	1937.19	0.187816	279.531	6.93015	103.893
	shi_03m_m67_a3_001	shi_03m_m67_a3_001.xlsx_RoiSetAuto-3.zip Distance px	55	3047.01	1.04181	279.531	10.9004	103.893
	shi_03m_m67_a3_001	shi_03m_m67_a3_001.xlsx_RoiSetAuto-30.zip Distance px	63	3169.63	1.15046	279.531	11.3391	103.893
	shi_03m_m67_a3_001	shi_03m_m67_a3_001.xlsx_RoiSetAuto-32.zip Distance px	23	3416.01	1.04744	279.531	12.2205	103.893
	shi_03m_m67_a3_001	shi_03m_m67_a3_001.xlsx_RoiSetAuto-33.zip Distance px	3	1799.25	0.463475	279.531	6.43667	103.893
	shi_03m_m67_a3_001	shi_03m_m67_a3_001.xlsx_RoiSetAuto-34.zip Distance px	3	2058.51	0.315671	279.531	7.36418	103.893
	shi_03m_m67_a3_001	shi_03m_m67_a3_001.xlsx_RoiSetAuto-36.zip Distance px	66	2642.08	0.920857	279.531	9.45185	103.893
	shi_03m_m67_a3_001	shi_03m_m67_a3_001.xlsx_RoiSetAuto-37.zip Distance px	4	2257.81	0.345612	279.531	8.07714	103.893
	shi_03m_m67_a3_001	shi_03m_m67_a3_001.xlsx_RoiSetAuto-38.zip Distance px	21	2963.55	0.877258	279.531	10.6019	103.893
	shi_03m_m67_a3_001	shi_03m_m67_a3_001.xlsx_RoiSetAuto-39.zip Distance px	4	1681.99	0.225092	279.531	6.0172	103.893
	shi_03m_m67_a3_001	shi_03m_m67_a3_001.xlsx_RoiSetAuto-4.zip Distance px	13	2988.89	0.74816	279.531	10.6925	103.893
	shi_03m_m67_a3_001	shi_03m_m67_a3_001.xlsx_RoiSetAuto-40.zip Distance px	3	1917.93	0.069742	279.531	6.86126	103.893
	shi_03m_m67_a3_001	shi_03m_m67_a3_001.xlsx_RoiSetAuto-41.zip Distance px	71	3467.36	0.985267	279.531	12.4042	103.893
	shi_03m_m67_a3_001	shi_03m_m67_a3_001.xlsx_RoiSetAuto-42.zip Distance px	3	1890.06	0.272754	279.531	6.76153	103.893
	shi_03m_m67_a3_001	shi_03m_m67_a3_001.xlsx_RoiSetAuto-43.zip Distance px	61	3169.76	1.3193	279.531	11.3396	103.893
	shi_03m_m67_a3_001	shi_03m_m67_a3_001.xlsx_RoiSetAuto-44.zip Distance px	5	2006.46	0.262059	279.531	7.17795	103.893
	shi_03m_m67_a3_001	shi_03m_m67_a3_001.xlsx_RoiSetAuto-45.zip Distance px	18	2507.49	0.641497	279.531	8.97037	103.893
	shi_03m_m67_a3_001	shi_03m_m67_a3_001.xlsx_RoiSetAuto-46.zip Distance px	4	1729.14	0.208964	279.531	6.18588	103.893
	shi_03m_m67_a3_001	shi_03m_m67_a3_001.xlsx_RoiSetAuto-47.zip Distance px	3	2160.15	0.40569	279.531	7.72777	103.893
	shi_03m_m67_a3_001	shi_03m_m67_a3_001.xlsx_RoiSetAuto-48.zip Distance px	4	2203.43	0.388791	279.531	7.8826	103.893
	shi_03m_m67_a3_001	shi_03m_m67_a3_001.xlsx_RoiSetAuto-49.zip Distance px	7	2024.44	0.596006	279.531	7.24229	103.893
	shi_03m_m67_a3_001	shi_03m_m67_a3_001.xlsx_RoiSetAuto-5.zip Distance px	17	2480.73	0.624088	279.531	8.87462	103.893
	shi_03m_m67_a3_001	shi_03m_m67_a3_001.xlsx_RoiSetAuto-50.zip Distance px	3	1791.11	0.145837	279.531	6.40756	103.893
	shi_03m_m67_a3_001	shi_03m_m67_a3_001.xlsx_RoiSetAuto-51.zip Distance px	9	2593.29	0.708761	279.531	9.27731	103.893
	shi_03m_m67_a3_001	shi_03m_m67_a3_001.xlsx_RoiSetAuto-52.zip Distance px	6	1979.06	0.554996	279.531	7.07993	103.893
	shi_03m_m67_a3_001	shi_03m_m67_a3_001.xlsx_RoiSetAuto-53.zip Distance px	6	2493.62	0.889256	279.531	8.92073	103.893
	shi_03m_m67_a3_001	shi_03m_m67_a3_001.xlsx_RoiSetAuto-55.zip Distance px	10	1982.77	0.671078	279.531	7.09321	103.893
	shi_03m_m67_a3_001	shi_03m_m67_a3_001.xlsx_RoiSetAuto-56.zip Distance px	3	1964.46	0.486865	279.531	7.0277	103.893
	shi_03m_m67_a3_001	shi_03m_m67_a3_001.xlsx_RoiSetAuto-57.zip Distance px	58	2361.29	0.683676	279.531	8.44734	103.893
	shi_03m_m67_a3_001	shi_03m_m67_a3_001.xlsx_RoiSetAuto-58.zip Distance px	36	3076.07	1.10565	279.531	11.0044	103.893
	shi_03m_m67_a3_001	shi_03m_m67_a3_001.xlsx_RoiSetAuto-6.zip Distance px	21	2876.38	0.876086	279.531	10.29	103.893
	shi_03m_m67_a3_001	shi_03m_m67_a3_001.xlsx_RoiSetAuto-60.zip Distance px	4	1914.83	0.387885	279.531	6.85014	103.893
	shi_03m_m67_a3_001	shi_03m_m67_a3_001.xlsx_RoiSetAuto-61.zip Distance px	4	1991.45	0.457617	279.531	7.12428	103.893
	shi_03m_m67_a3_001	shi_03m_m67_a3_001.xlsx_RoiSetAuto-62.zip Distance px	12	3254.54	0.367631	279.531	11.6429	103.893
	shi_03m_m67_a3_001	shi_03m_m67_a3_001.xlsx_RoiSetAuto-63.zip Distance px	4	2405.26	0.496673	279.531	8.60463	103.893
	shi_03m_m67_a3_001	shi_03m_m67_a3_001.xlsx_RoiSetAuto-66.zip Distance px	5	2190.76	0.434827	279.531	7.83727	103.893
	shi_03m_m67_a3_001	shi_03m_m67_a3_001.xlsx_RoiSetAuto-67.zip Distance px	7	2188.49	0.605015	279.531	7.82917	103.893
	shi_03m_m67_a3_001	shi_03m_m67_a3_001.xlsx_RoiSetAuto-68.zip Distance px	23	2084.68	0.630818	279.531	7.45777	103.893
	shi_03m_m67_a3_001	shi_03m_m67_a3_001.xlsx_RoiSetAuto-69.zip Distance px	7	1887.86	0.359515	279.531	6.75369	103.893
	shi_03m_m67_a3_001	shi_03m_m67_a3_001.xlsx_RoiSetAuto-7.zip Distance px	6	2059.68	0.415611	279.531	7.36835	103.893
	shi_03m_m67_a3_001	shi_03m_m67_a3_001.xlsx_RoiSetAuto-70.zip Distance px	5	1974.19	0.396993	279.531	7.06252	103.893
	shi_03m_m67_a3_001	shi_03m_m67_a3_001.xlsx_RoiSetAuto-71.zip Distance px	10	1759.41	0.745249	279.531	6.29416	103.893
	shi_03m_m67_a3_001	shi_03m_m67_a3_001.xlsx_RoiSetAuto-72.zip Distance px	10	2238.77	0.620867	279.531	8.00903	103.893
	shi_03m_m67_a3_001	shi_03m_m67_a3_001.xlsx_RoiSetAuto-73.zip Distance px	4	2040.79	0.145808	279.531	7.30078	103.893
	shi_03m_m67_a3_001	shi_03m_m67_a3_001.xlsx_RoiSetAuto-74.zip Distance px	21	2409.01	0.759318	279.531	8.61807	103.893
	shi_03m_m67_a3_001	shi_03m_m67_a3_001.xlsx_RoiSetAuto-75.zip Distance px	3	1801.89	0.168995	279.531	6.44612	103.893
	shi_03m_m67_a3_001	shi_03m_m67_a3_001.xlsx_RoiSetAuto-76.zip Distance px	8	2211.29	0.451043	279.531	7.91074	103.893
	shi_03m_m67_a3_001	shi_03m_m67_a3_001.xlsx_RoiSetAuto-77.zip Distance px	4	1786.02	0.307356	279.531	6.38934	103.893
	shi_03m_m67_a3_001	shi_03m_m67_a3_001.xlsx_RoiSetAuto-78.zip Distance px	5	1941.55	0.478173	279.531	6.94575	103.893
	shi_03m_m67_a3_001	shi_03m_m67_a3_001.xlsx_RoiSetAuto-79.zip Distance px	4	1752.21	0.179196	279.531	6.2684	103.893
	shi_03m_m67_a3_001	shi_03m_m67_a3_001.xlsx_RoiSetAuto-8.zip Distance px	28	3439.81	0.898689	279.531	12.3057	103.893
	shi_03m_m67_a3_001	shi_03m_m67_a3_001.xlsx_RoiSetAuto-80.zip Distance px	4	1763.62	0.059047	279.531	6.30923	103.893
	shi_03m_m67_a3_001	shi_03m_m67_a3_001.xlsx_RoiSetAuto-81.zip Distance px	4	1787.47	0.334034	279.531	6.39453	103.893
	shi_03m_m67_a3_001	shi_03m_m67_a3_001.xlsx_RoiSetAuto-82.zip Distance px	4	2038.36	0.482342	279.531	7.29209	103.893
	shi_03m_m67_a3_001	shi_03m_m67_a3_001.xlsx_RoiSetAuto-83.zip Distance px	35	2314.92	0.765537	279.531	8.28145	103.893
	shi_03m_m67_a3_001	shi_03m_m67_a3_001.xlsx_RoiSetAuto-84.zip Distance px	8	1820.42	0.174341	279.531	6.51241	103.893
	shi_03m_m67_a3_001	shi_03m_m67_a3_001.xlsx_RoiSetAuto-85.zip Distance px	14	2322.02	0.80963	279.531	8.30686	103.893
	shi_03m_m67_a3_001	shi_03m_m67_a3_001.xlsx_RoiSetAuto-86.zip Distance px	7	2053.33	0.628626	279.531	7.34563	103.893
	shi_03m_m67_a3_001	shi_03m_m67_a3_001.xlsx_RoiSetAuto-87.zip Distance px	12	2241.23	0.69215	279.531	8.01782	103.893
	shi_03m_m67_a3_001	shi_03m_m67_a3_001.xlsx_RoiSetAuto-88.zip Distance px	4	2064	0.381048	279.531	7.3838	103.893
	shi_03m_m67_a3_001	shi_03m_m67_a3_001.xlsx_RoiSetAuto-89.zip Distance px	6	2146.2	0.702207	279.531	7.67786	103.893
	shi_03m_m67_a3_001	shi_03m_m67_a3_001.xlsx_RoiSetAuto-9.zip Distance px	19	2879.34	0.498903	279.531	10.3006	103.893
	shi_03m_m67_a3_001	shi_03m_m67_a3_001.xlsx_RoiSetAuto-90.zip Distance px	4	2264.71	0.620011	279.531	8.10183	103.893
	shi_03m_m67_a3_001	shi_03m_m67_a3_001.xlsx_RoiSetAuto-91.zip Distance px	4	1722.48	0.194197	279.531	6.16203	103.893
	shi_03m_m67_a3_001	shi_03m_m67_a3_001.xlsx_RoiSetAuto-92.zip Distance px	5	2238.37	0.620129	279.531	8.00762	103.893
	shi_03m_m67_a3_001	shi_03m_m67_a3_001.xlsx_RoiSetAuto-93.zip Distance px	68	3260.65	0.757656	279.531	11.6647	103.893
	shi_03m_m67_a3_001	shi_03m_m67_a3_001.xlsx_RoiSetAuto-94.zip Distance px	11	3181.98	0.784264	279.531	11.3833	103.893
	shi_03m_m67_a3_001	shi_03m_m67_a3_001.xlsx_RoiSetAuto-95.zip Distance px	39	2269.56	0.900777	279.531	8.1192	103.893
	shi_03m_m67_a3_001	shi_03m_m67_a3_001.xlsx_RoiSetAuto-96.zip Distance px	20	2307.61	0.584873	279.531	8.25532	103.893
	shi_03m_m67_a3_001	shi_03m_m67_a3_001.xlsx_RoiSetAuto-97.zip Distance px	9	1904.68	0.453468	279.531	6.81387	103.893
	shi_03m_m67_a3_001	shi_03m_m67_a3_001.xlsx_RoiSetAuto-98.zip Distance px	5	1697.87	0.427281	279.531	6.074	103.893
	shi_03m_m67_a3_001	shi_03m_m67_a3_001.xlsx_RoiSetAuto-99.zip Distance px	10	2082.54	0.787484	279.531	7.45013	103.893
	shi_03m_m67_a3_002	shi_03m_m67_a3_002.xlsx_RoiSetAuto-1.zip Distance px	10	2290.09	0.472437	285.326	8.02622	112.053
	shi_03m_m67_a3_002	shi_03m_m67_a3_002.xlsx_RoiSetAuto-10.zip Distance px	9	2147.84	0.373868	285.326	7.52765	112.053
	shi_03m_m67_a3_002	shi_03m_m67_a3_002.xlsx_RoiSetAuto-100.zip Distance px	10	2455.81	0.450657	285.326	8.60704	112.053
	shi_03m_m67_a3_002	shi_03m_m67_a3_002.xlsx_RoiSetAuto-101.zip Distance px	3	2363.47	0.456517	285.326	8.2834	112.053
	shi_03m_m67_a3_002	shi_03m_m67_a3_002.xlsx_RoiSetAuto-102.zip Distance px	6	2698.16	0.627363	285.326	9.45643	112.053
	shi_03m_m67_a3_002	shi_03m_m67_a3_002.xlsx_RoiSetAuto-103.zip Distance px	7	1934.34	0.307332	285.326	6.77941	112.053
	shi_03m_m67_a3_002	shi_03m_m67_a3_002.xlsx_RoiSetAuto-104.zip Distance px	10	2278.94	0.745504	285.326	7.98716	112.053
	shi_03m_m67_a3_002	shi_03m_m67_a3_002.xlsx_RoiSetAuto-105.zip Distance px	21	2737.39	1.14809	285.326	9.59391	112.053
	shi_03m_m67_a3_002	shi_03m_m67_a3_002.xlsx_RoiSetAuto-106.zip Distance px	3	2486.37	0.445755	285.326	8.71414	112.053
	shi_03m_m67_a3_002	shi_03m_m67_a3_002.xlsx_RoiSetAuto-107.zip Distance px	3	1783.18	0.210212	285.326	6.24962	112.053
	shi_03m_m67_a3_002	shi_03m_m67_a3_002.xlsx_RoiSetAuto-108.zip Distance px	7	2118.52	0.82155	285.326	7.42491	112.053
	shi_03m_m67_a3_002	shi_03m_m67_a3_002.xlsx_RoiSetAuto-109.zip Distance px	9	3945.9	0.484559	285.326	13.8294	112.053
	shi_03m_m67_a3_002	shi_03m_m67_a3_002.xlsx_RoiSetAuto-11.zip Distance px	9	2125.79	0.301432	285.326	7.4504	112.053
	shi_03m_m67_a3_002	shi_03m_m67_a3_002.xlsx_RoiSetAuto-110.zip Distance px	5	2352.62	0.525318	285.326	8.24536	112.053
	shi_03m_m67_a3_002	shi_03m_m67_a3_002.xlsx_RoiSetAuto-111.zip Distance px	4	2572.7	0.246211	285.326	9.01672	112.053
	shi_03m_m67_a3_002	shi_03m_m67_a3_002.xlsx_RoiSetAuto-112.zip Distance px	19	4065.53	0.767622	285.326	14.2487	112.053
	shi_03m_m67_a3_002	shi_03m_m67_a3_002.xlsx_RoiSetAuto-113.zip Distance px	5	2218.84	0.313339	285.326	7.77653	112.053
	shi_03m_m67_a3_002	shi_03m_m67_a3_002.xlsx_RoiSetAuto-114.zip Distance px	18	3304.66	0.522378	285.326	11.5821	112.053
	shi_03m_m67_a3_002	shi_03m_m67_a3_002.xlsx_RoiSetAuto-115.zip Distance px	8	2412.78	0.621972	285.326	8.45623	112.053
	shi_03m_m67_a3_002	shi_03m_m67_a3_002.xlsx_RoiSetAuto-116.zip Distance px	4	2370.89	0.503675	285.326	8.3094	112.053
	shi_03m_m67_a3_002	shi_03m_m67_a3_002.xlsx_RoiSetAuto-117.zip Distance px	8	2700.46	0.513506	285.326	9.46448	112.053
	shi_03m_m67_a3_002	shi_03m_m67_a3_002.xlsx_RoiSetAuto-118.zip Distance px	7	2272.43	0.458108	285.326	7.96432	112.053
	shi_03m_m67_a3_002	shi_03m_m67_a3_002.xlsx_RoiSetAuto-119.zip Distance px	5	2629.39	0.5227	285.326	9.21537	112.053
	shi_03m_m67_a3_002	shi_03m_m67_a3_002.xlsx_RoiSetAuto-12.zip Distance px	30	2938.99	0.719583	285.326	10.3005	112.053
	shi_03m_m67_a3_002	shi_03m_m67_a3_002.xlsx_RoiSetAuto-120.zip Distance px	3	2636.58	0.41001	285.326	9.24059	112.053
	shi_03m_m67_a3_002	shi_03m_m67_a3_002.xlsx_RoiSetAuto-13.zip Distance px	20	2695.95	0.976244	285.326	9.44866	112.053
	shi_03m_m67_a3_002	shi_03m_m67_a3_002.xlsx_RoiSetAuto-14.zip Distance px	4	2113.56	0.378799	285.326	7.40752	112.053
	shi_03m_m67_a3_002	shi_03m_m67_a3_002.xlsx_RoiSetAuto-15.zip Distance px	5	2505.17	0.371585	285.326	8.78002	112.053
	shi_03m_m67_a3_002	shi_03m_m67_a3_002.xlsx_RoiSetAuto-16.zip Distance px	5	2351.85	0.553453	285.326	8.24268	112.053
	shi_03m_m67_a3_002	shi_03m_m67_a3_002.xlsx_RoiSetAuto-17.zip Distance px	4	2605.91	0.189394	285.326	9.1331	112.053
	shi_03m_m67_a3_002	shi_03m_m67_a3_002.xlsx_RoiSetAuto-18.zip Distance px	4	1989.66	0.582086	285.326	6.97329	112.053
	shi_03m_m67_a3_002	shi_03m_m67_a3_002.xlsx_RoiSetAuto-19.zip Distance px	11	2464.23	0.470505	285.326	8.63654	112.053
	shi_03m_m67_a3_002	shi_03m_m67_a3_002.xlsx_RoiSetAuto-2.zip Distance px	106	4968.98	1.22513	285.326	17.4151	112.053
	shi_03m_m67_a3_002	shi_03m_m67_a3_002.xlsx_RoiSetAuto-20.zip Distance px	3	2388.76	0.400241	285.326	8.37204	112.053
	shi_03m_m67_a3_002	shi_03m_m67_a3_002.xlsx_RoiSetAuto-21.zip Distance px	6	2842.5	0.764687	285.326	9.96227	112.053
	shi_03m_m67_a3_002	shi_03m_m67_a3_002.xlsx_RoiSetAuto-22.zip Distance px	46	4047.07	0.809564	285.326	14.184	112.053
	shi_03m_m67_a3_002	shi_03m_m67_a3_002.xlsx_RoiSetAuto-23.zip Distance px	8	2187.02	0.552651	285.326	7.66499	112.053
	shi_03m_m67_a3_002	shi_03m_m67_a3_002.xlsx_RoiSetAuto-25.zip Distance px	3	2054.42	0.273476	285.326	7.20027	112.053
	shi_03m_m67_a3_002	shi_03m_m67_a3_002.xlsx_RoiSetAuto-26.zip Distance px	4	2228.61	0.347709	285.326	7.81075	112.053
	shi_03m_m67_a3_002	shi_03m_m67_a3_002.xlsx_RoiSetAuto-27.zip Distance px	21	2763.67	0.82938	285.326	9.68602	112.053
	shi_03m_m67_a3_002	shi_03m_m67_a3_002.xlsx_RoiSetAuto-28.zip Distance px	5	2052.95	0.469866	285.326	7.19511	112.053
	shi_03m_m67_a3_002	shi_03m_m67_a3_002.xlsx_RoiSetAuto-29.zip Distance px	7	2091.64	0.389836	285.326	7.3307	112.053
	shi_03m_m67_a3_002	shi_03m_m67_a3_002.xlsx_RoiSetAuto-3.zip Distance px	7	2306.28	0.358645	285.326	8.08298	112.053
	shi_03m_m67_a3_002	shi_03m_m67_a3_002.xlsx_RoiSetAuto-30.zip Distance px	15	2158.89	0.531511	285.326	7.56641	112.053
	shi_03m_m67_a3_002	shi_03m_m67_a3_002.xlsx_RoiSetAuto-31.zip Distance px	5	2616.28	0.61053	285.326	9.16946	112.053
	shi_03m_m67_a3_002	shi_03m_m67_a3_002.xlsx_RoiSetAuto-32.zip Distance px	24	2752.03	0.792217	285.326	9.64521	112.053
	shi_03m_m67_a3_002	shi_03m_m67_a3_002.xlsx_RoiSetAuto-33.zip Distance px	4	2343.51	0.504871	285.326	8.21344	112.053
	shi_03m_m67_a3_002	shi_03m_m67_a3_002.xlsx_RoiSetAuto-34.zip Distance px	3	2179.68	0.492889	285.326	7.63927	112.053
	shi_03m_m67_a3_002	shi_03m_m67_a3_002.xlsx_RoiSetAuto-35.zip Distance px	3	2443.17	0.329422	285.326	8.56274	112.053
	shi_03m_m67_a3_002	shi_03m_m67_a3_002.xlsx_RoiSetAuto-36.zip Distance px	3	2398.16	0.355609	285.326	8.40499	112.053
	shi_03m_m67_a3_002	shi_03m_m67_a3_002.xlsx_RoiSetAuto-37.zip Distance px	13	2607.99	0.791473	285.326	9.14038	112.053
	shi_03m_m67_a3_002	shi_03m_m67_a3_002.xlsx_RoiSetAuto-38.zip Distance px	6	2207.52	0.455124	285.326	7.73683	112.053
	shi_03m_m67_a3_002	shi_03m_m67_a3_002.xlsx_RoiSetAuto-39.zip Distance px	8	2249.01	0.458337	285.326	7.88223	112.053
	shi_03m_m67_a3_002	shi_03m_m67_a3_002.xlsx_RoiSetAuto-4.zip Distance px	19	3083.54	0.536245	285.326	10.8071	112.053
	shi_03m_m67_a3_002	shi_03m_m67_a3_002.xlsx_RoiSetAuto-40.zip Distance px	34	2729.89	0.978613	285.326	9.56761	112.053
	shi_03m_m67_a3_002	shi_03m_m67_a3_002.xlsx_RoiSetAuto-41.zip Distance px	5	2102.38	0.302839	285.326	7.36833	112.053
	shi_03m_m67_a3_002	shi_03m_m67_a3_002.xlsx_RoiSetAuto-42.zip Distance px	4	2354.94	0.297544	285.326	8.25352	112.053
	shi_03m_m67_a3_002	shi_03m_m67_a3_002.xlsx_RoiSetAuto-43.zip Distance px	16	2161.27	0.429533	285.326	7.57474	112.053
	shi_03m_m67_a3_002	shi_03m_m67_a3_002.xlsx_RoiSetAuto-44.zip Distance px	6	2018.77	0.517558	285.326	7.07532	112.053
	shi_03m_m67_a3_002	shi_03m_m67_a3_002.xlsx_RoiSetAuto-45.zip Distance px	20	2468.32	0.70253	285.326	8.65087	112.053
	shi_03m_m67_a3_002	shi_03m_m67_a3_002.xlsx_RoiSetAuto-46.zip Distance px	8	2322.35	0.428232	285.326	8.13927	112.053
	shi_03m_m67_a3_002	shi_03m_m67_a3_002.xlsx_RoiSetAuto-47.zip Distance px	4	2956.78	0.206201	285.326	10.3628	112.053
	shi_03m_m67_a3_002	shi_03m_m67_a3_002.xlsx_RoiSetAuto-48.zip Distance px	15	2396.31	0.732755	285.326	8.39849	112.053
	shi_03m_m67_a3_002	shi_03m_m67_a3_002.xlsx_RoiSetAuto-49.zip Distance px	19	2367.35	0.712446	285.326	8.29699	112.053
	shi_03m_m67_a3_002	shi_03m_m67_a3_002.xlsx_RoiSetAuto-5.zip Distance px	4	2034.79	0.28299	285.326	7.13146	112.053
	shi_03m_m67_a3_002	shi_03m_m67_a3_002.xlsx_RoiSetAuto-50.zip Distance px	8	2308.01	0.802811	285.326	8.08901	112.053
	shi_03m_m67_a3_002	shi_03m_m67_a3_002.xlsx_RoiSetAuto-51.zip Distance px	9	2728.64	0.628702	285.326	9.56325	112.053
	shi_03m_m67_a3_002	shi_03m_m67_a3_002.xlsx_RoiSetAuto-52.zip Distance px	3	2472.11	0.129319	285.326	8.66417	112.053
	shi_03m_m67_a3_002	shi_03m_m67_a3_002.xlsx_RoiSetAuto-53.zip Distance px	4	1948.5	0.278653	285.326	6.82902	112.053
	shi_03m_m67_a3_002	shi_03m_m67_a3_002.xlsx_RoiSetAuto-54.zip Distance px	6	2372.15	0.374993	285.326	8.31382	112.053
	shi_03m_m67_a3_002	shi_03m_m67_a3_002.xlsx_RoiSetAuto-55.zip Distance px	3	2003.18	0.11542	285.326	7.02069	112.053
	shi_03m_m67_a3_002	shi_03m_m67_a3_002.xlsx_RoiSetAuto-56.zip Distance px	6	2066.3	0.251779	285.326	7.24191	112.053
	shi_03m_m67_a3_002	shi_03m_m67_a3_002.xlsx_RoiSetAuto-57.zip Distance px	3	1886.13	0.499808	285.326	6.61042	112.053
	shi_03m_m67_a3_002	shi_03m_m67_a3_002.xlsx_RoiSetAuto-58.zip Distance px	6	2101.31	0.29666	285.326	7.36459	112.053
	shi_03m_m67_a3_002	shi_03m_m67_a3_002.xlsx_RoiSetAuto-59.zip Distance px	4	2071.21	0.143581	285.326	7.25909	112.053
	shi_03m_m67_a3_002	shi_03m_m67_a3_002.xlsx_RoiSetAuto-6.zip Distance px	5	2570.03	0.345398	285.326	9.00733	112.053
	shi_03m_m67_a3_002	shi_03m_m67_a3_002.xlsx_RoiSetAuto-60.zip Distance px	7	2133.75	0.156884	285.326	7.4783	112.053
	shi_03m_m67_a3_002	shi_03m_m67_a3_002.xlsx_RoiSetAuto-61.zip Distance px	16	5259.21	0.73706	285.326	18.4323	112.053
	shi_03m_m67_a3_002	shi_03m_m67_a3_002.xlsx_RoiSetAuto-62.zip Distance px	3	2203.73	0.031952	285.326	7.72356	112.053
	shi_03m_m67_a3_002	shi_03m_m67_a3_002.xlsx_RoiSetAuto-63.zip Distance px	56	4053.37	1.07667	285.326	14.2061	112.053
	shi_03m_m67_a3_002	shi_03m_m67_a3_002.xlsx_RoiSetAuto-64.zip Distance px	3	1981.27	0.340492	285.326	6.94386	112.053
	shi_03m_m67_a3_002	shi_03m_m67_a3_002.xlsx_RoiSetAuto-65.zip Distance px	6	1854.93	0.265528	285.326	6.5011	112.053
	shi_03m_m67_a3_002	shi_03m_m67_a3_002.xlsx_RoiSetAuto-66.zip Distance px	9	2457.75	0.638309	285.326	8.61385	112.053
	shi_03m_m67_a3_002	shi_03m_m67_a3_002.xlsx_RoiSetAuto-67.zip Distance px	15	2722.25	0.987398	285.326	9.54084	112.053
	shi_03m_m67_a3_002	shi_03m_m67_a3_002.xlsx_RoiSetAuto-68.zip Distance px	25	2339.64	0.48599	285.326	8.19988	112.053
	shi_03m_m67_a3_002	shi_03m_m67_a3_002.xlsx_RoiSetAuto-69.zip Distance px	6	2311.59	0.312628	285.326	8.10156	112.053
	shi_03m_m67_a3_002	shi_03m_m67_a3_002.xlsx_RoiSetAuto-7.zip Distance px	5	2304.2	0.393356	285.326	8.07569	112.053
	shi_03m_m67_a3_002	shi_03m_m67_a3_002.xlsx_RoiSetAuto-70.zip Distance px	4	2070.85	0.226354	285.326	7.25783	112.053
	shi_03m_m67_a3_002	shi_03m_m67_a3_002.xlsx_RoiSetAuto-71.zip Distance px	9	2078.97	0.594219	285.326	7.2863	112.053
	shi_03m_m67_a3_002	shi_03m_m67_a3_002.xlsx_RoiSetAuto-72.zip Distance px	5	1903.68	0.240159	285.326	6.67196	112.053
	shi_03m_m67_a3_002	shi_03m_m67_a3_002.xlsx_RoiSetAuto-73.zip Distance px	6	2169.87	0.513949	285.326	7.60488	112.053
	shi_03m_m67_a3_002	shi_03m_m67_a3_002.xlsx_RoiSetAuto-74.zip Distance px	8	2484.49	0.698144	285.326	8.70753	112.053
	shi_03m_m67_a3_002	shi_03m_m67_a3_002.xlsx_RoiSetAuto-75.zip Distance px	45	4457.18	0.650642	285.326	15.6213	112.053
	shi_03m_m67_a3_002	shi_03m_m67_a3_002.xlsx_RoiSetAuto-76.zip Distance px	8	2490.71	0.831982	285.326	8.72934	112.053
	shi_03m_m67_a3_002	shi_03m_m67_a3_002.xlsx_RoiSetAuto-77.zip Distance px	7	2474.76	0.292296	285.326	8.67343	112.053
	shi_03m_m67_a3_002	shi_03m_m67_a3_002.xlsx_RoiSetAuto-78.zip Distance px	3	2157.3	0.323636	285.326	7.56082	112.053
	shi_03m_m67_a3_002	shi_03m_m67_a3_002.xlsx_RoiSetAuto-79.zip Distance px	4	2274.96	0.352291	285.326	7.97319	112.053
	shi_03m_m67_a3_002	shi_03m_m67_a3_002.xlsx_RoiSetAuto-8.zip Distance px	11	2116.03	0.273296	285.326	7.41619	112.053
	shi_03m_m67_a3_002	shi_03m_m67_a3_002.xlsx_RoiSetAuto-80.zip Distance px	7	2055.42	0.557704	285.326	7.20375	112.053
	shi_03m_m67_a3_002	shi_03m_m67_a3_002.xlsx_RoiSetAuto-81.zip Distance px	4	2285.32	0.522485	285.326	8.0095	112.053
	shi_03m_m67_a3_002	shi_03m_m67_a3_002.xlsx_RoiSetAuto-82.zip Distance px	8	2071.34	0.551921	285.326	7.25956	112.053
	shi_03m_m67_a3_002	shi_03m_m67_a3_002.xlsx_RoiSetAuto-83.zip Distance px	10	2354.17	0.464866	285.326	8.2508	112.053
	shi_03m_m67_a3_002	shi_03m_m67_a3_002.xlsx_RoiSetAuto-84.zip Distance px	16	2404.24	0.914022	285.326	8.4263	112.053
	shi_03m_m67_a3_002	shi_03m_m67_a3_002.xlsx_RoiSetAuto-85.zip Distance px	3	1957.41	0.454881	285.326	6.86027	112.053
	shi_03m_m67_a3_002	shi_03m_m67_a3_002.xlsx_RoiSetAuto-86.zip Distance px	14	2398.03	0.762015	285.326	8.40451	112.053
	shi_03m_m67_a3_002	shi_03m_m67_a3_002.xlsx_RoiSetAuto-87.zip Distance px	3	2195.93	0.395945	285.326	7.69621	112.053
	shi_03m_m67_a3_002	shi_03m_m67_a3_002.xlsx_RoiSetAuto-88.zip Distance px	19	2564.11	0.638836	285.326	8.98658	112.053
	shi_03m_m67_a3_002	shi_03m_m67_a3_002.xlsx_RoiSetAuto-89.zip Distance px	6	2088.21	0.568299	285.326	7.31868	112.053
	shi_03m_m67_a3_002	shi_03m_m67_a3_002.xlsx_RoiSetAuto-9.zip Distance px	7	2277.01	0.632309	285.326	7.98039	112.053
	shi_03m_m67_a3_002	shi_03m_m67_a3_002.xlsx_RoiSetAuto-90.zip Distance px	3	2326.51	0.490523	285.326	8.15387	112.053
	shi_03m_m67_a3_002	shi_03m_m67_a3_002.xlsx_RoiSetAuto-91.zip Distance px	20	2706.57	0.760738	285.326	9.48589	112.053
	shi_03m_m67_a3_002	shi_03m_m67_a3_002.xlsx_RoiSetAuto-92.zip Distance px	3	2138.25	0.247563	285.326	7.49406	112.053
	shi_03m_m67_a3_002	shi_03m_m67_a3_002.xlsx_RoiSetAuto-93.zip Distance px	3	1879.98	0.274485	285.326	6.58887	112.053
	shi_03m_m67_a3_002	shi_03m_m67_a3_002.xlsx_RoiSetAuto-94.zip Distance px	7	2269.49	0.623214	285.326	7.95403	112.053
	shi_03m_m67_a3_002	shi_03m_m67_a3_002.xlsx_RoiSetAuto-96.zip Distance px	30	2725.82	0.628777	285.326	9.55334	112.053
	shi_03m_m67_a3_002	shi_03m_m67_a3_002.xlsx_RoiSetAuto-97.zip Distance px	4	2514.53	0.522388	285.326	8.81283	112.053
	shi_03m_m67_a3_002	shi_03m_m67_a3_002.xlsx_RoiSetAuto-99.zip Distance px	13	3583.4	0.421917	285.326	12.559	112.053
	shi_03m_m67_a3_003	shi_03m_m67_a3_003.xlsx_RoiSetAuto-1.zip Distance px	3	2929.95	0.472073	349.283	8.38848	101.973
	shi_03m_m67_a3_003	shi_03m_m67_a3_003.xlsx_RoiSetAuto-10.zip Distance px	210	8887.8	0.522719	349.283	25.4459	101.973
	shi_03m_m67_a3_003	shi_03m_m67_a3_003.xlsx_RoiSetAuto-100.zip Distance px	8	3008.12	0.523968	349.283	8.61228	101.973
	shi_03m_m67_a3_003	shi_03m_m67_a3_003.xlsx_RoiSetAuto-101.zip Distance px	8	2797.44	0.394947	349.283	8.00909	101.973
	shi_03m_m67_a3_003	shi_03m_m67_a3_003.xlsx_RoiSetAuto-102.zip Distance px	3	2689.68	0.165463	349.283	7.70059	101.973
	shi_03m_m67_a3_003	shi_03m_m67_a3_003.xlsx_RoiSetAuto-103.zip Distance px	16	3410.72	0.579788	349.283	9.76493	101.973
	shi_03m_m67_a3_003	shi_03m_m67_a3_003.xlsx_RoiSetAuto-104.zip Distance px	6	2780.27	0.425249	349.283	7.95994	101.973
	shi_03m_m67_a3_003	shi_03m_m67_a3_003.xlsx_RoiSetAuto-105.zip Distance px	7	2905	0.312364	349.283	8.31704	101.973
	shi_03m_m67_a3_003	shi_03m_m67_a3_003.xlsx_RoiSetAuto-106.zip Distance px	5	3200.29	0.327297	349.283	9.16245	101.973
	shi_03m_m67_a3_003	shi_03m_m67_a3_003.xlsx_RoiSetAuto-107.zip Distance px	3	3153.14	0.429947	349.283	9.02747	101.973
	shi_03m_m67_a3_003	shi_03m_m67_a3_003.xlsx_RoiSetAuto-108.zip Distance px	32	3708.25	0.626046	349.283	10.6168	101.973
	shi_03m_m67_a3_003	shi_03m_m67_a3_003.xlsx_RoiSetAuto-109.zip Distance px	4	2779.26	0.318771	349.283	7.95705	101.973
	shi_03m_m67_a3_003	shi_03m_m67_a3_003.xlsx_RoiSetAuto-11.zip Distance px	107	4083.4	0.781557	349.283	11.6908	101.973
	shi_03m_m67_a3_003	shi_03m_m67_a3_003.xlsx_RoiSetAuto-110.zip Distance px	4	3035.95	0.398933	349.283	8.69195	101.973
	shi_03m_m67_a3_003	shi_03m_m67_a3_003.xlsx_RoiSetAuto-111.zip Distance px	3	2928.44	0.126198	349.283	8.38415	101.973
	shi_03m_m67_a3_003	shi_03m_m67_a3_003.xlsx_RoiSetAuto-112.zip Distance px	24	3692.06	0.696097	349.283	10.5704	101.973
	shi_03m_m67_a3_003	shi_03m_m67_a3_003.xlsx_RoiSetAuto-113.zip Distance px	11	3228.69	0.382217	349.283	9.24378	101.973
	shi_03m_m67_a3_003	shi_03m_m67_a3_003.xlsx_RoiSetAuto-114.zip Distance px	10	3081.44	0.483459	349.283	8.82221	101.973
	shi_03m_m67_a3_003	shi_03m_m67_a3_003.xlsx_RoiSetAuto-115.zip Distance px	3	3052.32	0.559774	349.283	8.73883	101.973
	shi_03m_m67_a3_003	shi_03m_m67_a3_003.xlsx_RoiSetAuto-116.zip Distance px	3	3071.25	0.411228	349.283	8.79302	101.973
	shi_03m_m67_a3_003	shi_03m_m67_a3_003.xlsx_RoiSetAuto-117.zip Distance px	4	2810.93	0.388524	349.283	8.04773	101.973
	shi_03m_m67_a3_003	shi_03m_m67_a3_003.xlsx_RoiSetAuto-118.zip Distance px	3	3090.07	0.284466	349.283	8.8469	101.973
	shi_03m_m67_a3_003	shi_03m_m67_a3_003.xlsx_RoiSetAuto-119.zip Distance px	4	3630.83	0.526829	349.283	10.3951	101.973
	shi_03m_m67_a3_003	shi_03m_m67_a3_003.xlsx_RoiSetAuto-12.zip Distance px	98	4040.49	0.813931	349.283	11.568	101.973
	shi_03m_m67_a3_003	shi_03m_m67_a3_003.xlsx_RoiSetAuto-13.zip Distance px	4	3021.76	0.352953	349.283	8.65133	101.973
	shi_03m_m67_a3_003	shi_03m_m67_a3_003.xlsx_RoiSetAuto-14.zip Distance px	4	2295.93	0.274356	349.283	6.57326	101.973
	shi_03m_m67_a3_003	shi_03m_m67_a3_003.xlsx_RoiSetAuto-15.zip Distance px	4	2633.14	0.205207	349.283	7.5387	101.973
	shi_03m_m67_a3_003	shi_03m_m67_a3_003.xlsx_RoiSetAuto-16.zip Distance px	6	2592.4	0.488588	349.283	7.42206	101.973
	shi_03m_m67_a3_003	shi_03m_m67_a3_003.xlsx_RoiSetAuto-17.zip Distance px	3	2627.73	0.359313	349.283	7.52323	101.973
	shi_03m_m67_a3_003	shi_03m_m67_a3_003.xlsx_RoiSetAuto-18.zip Distance px	6	2562.86	0.365498	349.283	7.3375	101.973
	shi_03m_m67_a3_003	shi_03m_m67_a3_003.xlsx_RoiSetAuto-19.zip Distance px	17	3051.36	0.377044	349.283	8.73607	101.973
	shi_03m_m67_a3_003	shi_03m_m67_a3_003.xlsx_RoiSetAuto-2.zip Distance px	14	3683.14	0.957166	349.283	10.5449	101.973
	shi_03m_m67_a3_003	shi_03m_m67_a3_003.xlsx_RoiSetAuto-20.zip Distance px	20	2923.83	0.490851	349.283	8.37096	101.973
	shi_03m_m67_a3_003	shi_03m_m67_a3_003.xlsx_RoiSetAuto-21.zip Distance px	75	4178.29	0.757725	349.283	11.9625	101.973
	shi_03m_m67_a3_003	shi_03m_m67_a3_003.xlsx_RoiSetAuto-22.zip Distance px	3	2639.84	0.283487	349.283	7.55789	101.973
	shi_03m_m67_a3_003	shi_03m_m67_a3_003.xlsx_RoiSetAuto-23.zip Distance px	10	2811.66	0.681096	349.283	8.0498	101.973
	shi_03m_m67_a3_003	shi_03m_m67_a3_003.xlsx_RoiSetAuto-24.zip Distance px	5	2524.84	0.451163	349.283	7.22865	101.973
	shi_03m_m67_a3_003	shi_03m_m67_a3_003.xlsx_RoiSetAuto-25.zip Distance px	8	2768.11	0.3653	349.283	7.92512	101.973
	shi_03m_m67_a3_003	shi_03m_m67_a3_003.xlsx_RoiSetAuto-26.zip Distance px	23	3371.76	0.414236	349.283	9.6534	101.973
	shi_03m_m67_a3_003	shi_03m_m67_a3_003.xlsx_RoiSetAuto-27.zip Distance px	5	2875.14	0.105709	349.283	8.23157	101.973
	shi_03m_m67_a3_003	shi_03m_m67_a3_003.xlsx_RoiSetAuto-28.zip Distance px	5	2742.02	0.296181	349.283	7.85042	101.973
	shi_03m_m67_a3_003	shi_03m_m67_a3_003.xlsx_RoiSetAuto-29.zip Distance px	5	3049.56	0.306183	349.283	8.73092	101.973
	shi_03m_m67_a3_003	shi_03m_m67_a3_003.xlsx_RoiSetAuto-3.zip Distance px	34	3610.42	0.931381	349.283	10.3367	101.973
	shi_03m_m67_a3_003	shi_03m_m67_a3_003.xlsx_RoiSetAuto-30.zip Distance px	25	3173.85	0.583221	349.283	9.08676	101.973
	shi_03m_m67_a3_003	shi_03m_m67_a3_003.xlsx_RoiSetAuto-31.zip Distance px	50	3437.92	0.688812	349.283	9.84281	101.973
	shi_03m_m67_a3_003	shi_03m_m67_a3_003.xlsx_RoiSetAuto-32.zip Distance px	16	2964.79	0.484027	349.283	8.48824	101.973
	shi_03m_m67_a3_003	shi_03m_m67_a3_003.xlsx_RoiSetAuto-33.zip Distance px	6	2854.56	0.382157	349.283	8.17265	101.973
	shi_03m_m67_a3_003	shi_03m_m67_a3_003.xlsx_RoiSetAuto-34.zip Distance px	3	3028.36	0.305913	349.283	8.67022	101.973
	shi_03m_m67_a3_003	shi_03m_m67_a3_003.xlsx_RoiSetAuto-35.zip Distance px	13	3112.71	0.522172	349.283	8.91171	101.973
	shi_03m_m67_a3_003	shi_03m_m67_a3_003.xlsx_RoiSetAuto-36.zip Distance px	4	2600.31	0.337177	349.283	7.44472	101.973
	shi_03m_m67_a3_003	shi_03m_m67_a3_003.xlsx_RoiSetAuto-37.zip Distance px	52	3516.72	0.879472	349.283	10.0684	101.973
	shi_03m_m67_a3_003	shi_03m_m67_a3_003.xlsx_RoiSetAuto-38.zip Distance px	6	2660.62	0.228757	349.283	7.61739	101.973
	shi_03m_m67_a3_003	shi_03m_m67_a3_003.xlsx_RoiSetAuto-39.zip Distance px	13	2825.28	0.570185	349.283	8.08881	101.973
	shi_03m_m67_a3_003	shi_03m_m67_a3_003.xlsx_RoiSetAuto-4.zip Distance px	106	3701.58	0.845388	349.283	10.5977	101.973
	shi_03m_m67_a3_003	shi_03m_m67_a3_003.xlsx_RoiSetAuto-40.zip Distance px	3	2565.75	0.054791	349.283	7.34576	101.973
	shi_03m_m67_a3_003	shi_03m_m67_a3_003.xlsx_RoiSetAuto-41.zip Distance px	3	2592.19	0.338633	349.283	7.42146	101.973
	shi_03m_m67_a3_003	shi_03m_m67_a3_003.xlsx_RoiSetAuto-42.zip Distance px	48	3588.2	0.81869	349.283	10.2731	101.973
	shi_03m_m67_a3_003	shi_03m_m67_a3_003.xlsx_RoiSetAuto-43.zip Distance px	3	2513.35	0.259485	349.283	7.19574	101.973
	shi_03m_m67_a3_003	shi_03m_m67_a3_003.xlsx_RoiSetAuto-44.zip Distance px	4	3205.38	0.354964	349.283	9.17702	101.973
	shi_03m_m67_a3_003	shi_03m_m67_a3_003.xlsx_RoiSetAuto-45.zip Distance px	3	2782.72	0.154647	349.283	7.96697	101.973
	shi_03m_m67_a3_003	shi_03m_m67_a3_003.xlsx_RoiSetAuto-46.zip Distance px	3	2720.56	0.393767	349.283	7.78899	101.973
	shi_03m_m67_a3_003	shi_03m_m67_a3_003.xlsx_RoiSetAuto-47.zip Distance px	31	3083.05	0.588453	349.283	8.82679	101.973
	shi_03m_m67_a3_003	shi_03m_m67_a3_003.xlsx_RoiSetAuto-48.zip Distance px	3	2588.08	0.303946	349.283	7.40969	101.973
	shi_03m_m67_a3_003	shi_03m_m67_a3_003.xlsx_RoiSetAuto-49.zip Distance px	4	2568.96	0.138775	349.283	7.35496	101.973
	shi_03m_m67_a3_003	shi_03m_m67_a3_003.xlsx_RoiSetAuto-5.zip Distance px	4	2541.67	0.247176	349.283	7.27683	101.973
	shi_03m_m67_a3_003	shi_03m_m67_a3_003.xlsx_RoiSetAuto-50.zip Distance px	5	3000.17	0.275824	349.283	8.58953	101.973
	shi_03m_m67_a3_003	shi_03m_m67_a3_003.xlsx_RoiSetAuto-51.zip Distance px	5	2642.83	0.311777	349.283	7.56644	101.973
	shi_03m_m67_a3_003	shi_03m_m67_a3_003.xlsx_RoiSetAuto-52.zip Distance px	18	2703.25	0.415317	349.283	7.73943	101.973
	shi_03m_m67_a3_003	shi_03m_m67_a3_003.xlsx_RoiSetAuto-53.zip Distance px	5	2638.49	0.487563	349.283	7.55404	101.973
	shi_03m_m67_a3_003	shi_03m_m67_a3_003.xlsx_RoiSetAuto-54.zip Distance px	3	2862.99	0.212006	349.283	8.19677	101.973
	shi_03m_m67_a3_003	shi_03m_m67_a3_003.xlsx_RoiSetAuto-55.zip Distance px	9	2886.89	0.433308	349.283	8.2652	101.973
	shi_03m_m67_a3_003	shi_03m_m67_a3_003.xlsx_RoiSetAuto-56.zip Distance px	3	2518.17	0.22923	349.283	7.20954	101.973
	shi_03m_m67_a3_003	shi_03m_m67_a3_003.xlsx_RoiSetAuto-57.zip Distance px	7	2851.04	0.348485	349.283	8.16255	101.973
	shi_03m_m67_a3_003	shi_03m_m67_a3_003.xlsx_RoiSetAuto-58.zip Distance px	18	3065.79	0.491325	349.283	8.7774	101.973
	shi_03m_m67_a3_003	shi_03m_m67_a3_003.xlsx_RoiSetAuto-59.zip Distance px	13	3060.79	0.540618	349.283	8.76308	101.973
	shi_03m_m67_a3_003	shi_03m_m67_a3_003.xlsx_RoiSetAuto-6.zip Distance px	6	2558.03	0.153698	349.283	7.32367	101.973
	shi_03m_m67_a3_003	shi_03m_m67_a3_003.xlsx_RoiSetAuto-60.zip Distance px	4	2715.14	0.223866	349.283	7.77348	101.973
	shi_03m_m67_a3_003	shi_03m_m67_a3_003.xlsx_RoiSetAuto-61.zip Distance px	24	2778.01	0.551846	349.283	7.95347	101.973
	shi_03m_m67_a3_003	shi_03m_m67_a3_003.xlsx_RoiSetAuto-62.zip Distance px	12	3017.24	0.360099	349.283	8.63838	101.973
	shi_03m_m67_a3_003	shi_03m_m67_a3_003.xlsx_RoiSetAuto-63.zip Distance px	17	3427.03	0.64141	349.283	9.81161	101.973
	shi_03m_m67_a3_003	shi_03m_m67_a3_003.xlsx_RoiSetAuto-64.zip Distance px	17	3243.61	0.696462	349.283	9.2865	101.973
	shi_03m_m67_a3_003	shi_03m_m67_a3_003.xlsx_RoiSetAuto-65.zip Distance px	4	2668.58	0.407881	349.283	7.64016	101.973
	shi_03m_m67_a3_003	shi_03m_m67_a3_003.xlsx_RoiSetAuto-66.zip Distance px	5	2656.55	0.258727	349.283	7.60574	101.973
	shi_03m_m67_a3_003	shi_03m_m67_a3_003.xlsx_RoiSetAuto-67.zip Distance px	10	2922.46	0.288051	349.283	8.36703	101.973
	shi_03m_m67_a3_003	shi_03m_m67_a3_003.xlsx_RoiSetAuto-68.zip Distance px	3	2734.44	0.218226	349.283	7.82874	101.973
	shi_03m_m67_a3_003	shi_03m_m67_a3_003.xlsx_RoiSetAuto-69.zip Distance px	3	2633.67	0.189994	349.283	7.54022	101.973
	shi_03m_m67_a3_003	shi_03m_m67_a3_003.xlsx_RoiSetAuto-7.zip Distance px	7	3344.97	0.434009	349.283	9.57668	101.973
	shi_03m_m67_a3_003	shi_03m_m67_a3_003.xlsx_RoiSetAuto-70.zip Distance px	4	3187.64	0.241893	349.283	9.12625	101.973
	shi_03m_m67_a3_003	shi_03m_m67_a3_003.xlsx_RoiSetAuto-71.zip Distance px	3	2927.05	0.416094	349.283	8.38018	101.973
	shi_03m_m67_a3_003	shi_03m_m67_a3_003.xlsx_RoiSetAuto-72.zip Distance px	60	3876.84	0.967415	349.283	11.0994	101.973
	shi_03m_m67_a3_003	shi_03m_m67_a3_003.xlsx_RoiSetAuto-73.zip Distance px	14	2850.19	0.459801	349.283	8.16013	101.973
	shi_03m_m67_a3_003	shi_03m_m67_a3_003.xlsx_RoiSetAuto-74.zip Distance px	4	3331.03	0.535609	349.283	9.53679	101.973
	shi_03m_m67_a3_003	shi_03m_m67_a3_003.xlsx_RoiSetAuto-75.zip Distance px	42	3682.39	0.664799	349.283	10.5427	101.973
	shi_03m_m67_a3_003	shi_03m_m67_a3_003.xlsx_RoiSetAuto-76.zip Distance px	21	3431.7	0.622409	349.283	9.82498	101.973
	shi_03m_m67_a3_003	shi_03m_m67_a3_003.xlsx_RoiSetAuto-77.zip Distance px	3	3177.92	0.105877	349.283	9.09842	101.973
	shi_03m_m67_a3_003	shi_03m_m67_a3_003.xlsx_RoiSetAuto-78.zip Distance px	6	2641.64	0.25502	349.283	7.56305	101.973
	shi_03m_m67_a3_003	shi_03m_m67_a3_003.xlsx_RoiSetAuto-79.zip Distance px	5	3001.91	0.339818	349.283	8.59451	101.973
	shi_03m_m67_a3_003	shi_03m_m67_a3_003.xlsx_RoiSetAuto-8.zip Distance px	30	2876.39	0.494965	349.283	8.23512	101.973
	shi_03m_m67_a3_003	shi_03m_m67_a3_003.xlsx_RoiSetAuto-80.zip Distance px	3	2712.77	0.090081	349.283	7.76669	101.973
	shi_03m_m67_a3_003	shi_03m_m67_a3_003.xlsx_RoiSetAuto-81.zip Distance px	26	3460.88	0.708727	349.283	9.90854	101.973
	shi_03m_m67_a3_003	shi_03m_m67_a3_003.xlsx_RoiSetAuto-82.zip Distance px	5	2931.8	0.38359	349.283	8.39376	101.973
	shi_03m_m67_a3_003	shi_03m_m67_a3_003.xlsx_RoiSetAuto-83.zip Distance px	40	3475.45	0.671118	349.283	9.95025	101.973
	shi_03m_m67_a3_003	shi_03m_m67_a3_003.xlsx_RoiSetAuto-84.zip Distance px	4	2933.24	0.313685	349.283	8.3979	101.973
	shi_03m_m67_a3_003	shi_03m_m67_a3_003.xlsx_RoiSetAuto-85.zip Distance px	29	3460.06	0.685336	349.283	9.90619	101.973
	shi_03m_m67_a3_003	shi_03m_m67_a3_003.xlsx_RoiSetAuto-86.zip Distance px	17	3162.78	0.475068	349.283	9.05507	101.973
	shi_03m_m67_a3_003	shi_03m_m67_a3_003.xlsx_RoiSetAuto-87.zip Distance px	15	3224.57	0.47413	349.283	9.23198	101.973
	shi_03m_m67_a3_003	shi_03m_m67_a3_003.xlsx_RoiSetAuto-88.zip Distance px	17	3473.26	0.367886	349.283	9.94399	101.973
	shi_03m_m67_a3_003	shi_03m_m67_a3_003.xlsx_RoiSetAuto-89.zip Distance px	43	3592.68	0.573272	349.283	10.2859	101.973
	shi_03m_m67_a3_003	shi_03m_m67_a3_003.xlsx_RoiSetAuto-9.zip Distance px	24	3801.65	0.529766	349.283	10.8842	101.973
	shi_03m_m67_a3_003	shi_03m_m67_a3_003.xlsx_RoiSetAuto-90.zip Distance px	56	3288.9	0.571536	349.283	9.41615	101.973
	shi_03m_m67_a3_003	shi_03m_m67_a3_003.xlsx_RoiSetAuto-91.zip Distance px	3	3149.34	0.45186	349.283	9.01658	101.973
	shi_03m_m67_a3_003	shi_03m_m67_a3_003.xlsx_RoiSetAuto-92.zip Distance px	66	3258.35	0.775257	349.283	9.32868	101.973
	shi_03m_m67_a3_003	shi_03m_m67_a3_003.xlsx_RoiSetAuto-93.zip Distance px	4	3257.21	0.124522	349.283	9.32544	101.973
	shi_03m_m67_a3_003	shi_03m_m67_a3_003.xlsx_RoiSetAuto-94.zip Distance px	21	2997.61	0.59904	349.283	8.58219	101.973
	shi_03m_m67_a3_003	shi_03m_m67_a3_003.xlsx_RoiSetAuto-95.zip Distance px	21	3397.18	0.685864	349.283	9.72617	101.973
	shi_03m_m67_a3_003	shi_03m_m67_a3_003.xlsx_RoiSetAuto-96.zip Distance px	8	2557.26	0.656207	349.283	7.32146	101.973
	shi_03m_m67_a3_003	shi_03m_m67_a3_003.xlsx_RoiSetAuto-97.zip Distance px	5	2658.08	0.411086	349.283	7.6101	101.973
	shi_03m_m67_a3_003	shi_03m_m67_a3_003.xlsx_RoiSetAuto-98.zip Distance px	57	4219.27	0.922315	349.283	12.0798	101.973
	shi_03m_m67_a3_003	shi_03m_m67_a3_003.xlsx_RoiSetAuto-99.zip Distance px	8	3042.41	0.457112	349.283	8.71047	101.973
	shi_04m_m67_a3_001	shi_04m_m67_a3_001.xlsx_RoiSetAuto-10.zip Distance px	118	5405.37	0.838375	283.752	19.0497	152
	shi_04m_m67_a3_001	shi_04m_m67_a3_001.xlsx_RoiSetAuto-100.zip Distance px	5	2745.6	0.504839	283.752	9.67606	152
	shi_04m_m67_a3_001	shi_04m_m67_a3_001.xlsx_RoiSetAuto-101.zip Distance px	31	3179.04	0.862165	283.752	11.2036	152
	shi_04m_m67_a3_001	shi_04m_m67_a3_001.xlsx_RoiSetAuto-102.zip Distance px	20	3012.56	0.693272	283.752	10.6169	152
	shi_04m_m67_a3_001	shi_04m_m67_a3_001.xlsx_RoiSetAuto-103.zip Distance px	10	2636.6	0.639889	283.752	9.29194	152
	shi_04m_m67_a3_001	shi_04m_m67_a3_001.xlsx_RoiSetAuto-105.zip Distance px	5	2655.97	0.101916	283.752	9.36021	152
	shi_04m_m67_a3_001	shi_04m_m67_a3_001.xlsx_RoiSetAuto-108.zip Distance px	35	3072.29	0.87643	283.752	10.8274	152
	shi_04m_m67_a3_001	shi_04m_m67_a3_001.xlsx_RoiSetAuto-11.zip Distance px	6	3867.77	0.402166	283.752	13.6308	152
	shi_04m_m67_a3_001	shi_04m_m67_a3_001.xlsx_RoiSetAuto-110.zip Distance px	4	2956.38	0.512343	283.752	10.4189	152
	shi_04m_m67_a3_001	shi_04m_m67_a3_001.xlsx_RoiSetAuto-114.zip Distance px	14	2798.62	0.68366	283.752	9.86294	152
	shi_04m_m67_a3_001	shi_04m_m67_a3_001.xlsx_RoiSetAuto-116.zip Distance px	5	2288.34	0.277524	283.752	8.0646	152
	shi_04m_m67_a3_001	shi_04m_m67_a3_001.xlsx_RoiSetAuto-118.zip Distance px	13	2519.93	0.571216	283.752	8.88078	152
	shi_04m_m67_a3_001	shi_04m_m67_a3_001.xlsx_RoiSetAuto-119.zip Distance px	46	4173.92	0.880607	283.752	14.7098	152
	shi_04m_m67_a3_001	shi_04m_m67_a3_001.xlsx_RoiSetAuto-12.zip Distance px	44	4951.88	0.665929	283.752	17.4515	152
	shi_04m_m67_a3_001	shi_04m_m67_a3_001.xlsx_RoiSetAuto-120.zip Distance px	19	2714.95	0.887647	283.752	9.56805	152
	shi_04m_m67_a3_001	shi_04m_m67_a3_001.xlsx_RoiSetAuto-122.zip Distance px	5	3417.13	0.255918	283.752	12.0427	152
	shi_04m_m67_a3_001	shi_04m_m67_a3_001.xlsx_RoiSetAuto-124.zip Distance px	4	2723.95	0.607481	283.752	9.59979	152
	shi_04m_m67_a3_001	shi_04m_m67_a3_001.xlsx_RoiSetAuto-125.zip Distance px	25	3238.31	0.685714	283.752	11.4125	152
	shi_04m_m67_a3_001	shi_04m_m67_a3_001.xlsx_RoiSetAuto-127.zip Distance px	4	2710.11	0.328493	283.752	9.551	152
	shi_04m_m67_a3_001	shi_04m_m67_a3_001.xlsx_RoiSetAuto-129.zip Distance px	6	2347.02	0.450839	283.752	8.2714	152
	shi_04m_m67_a3_001	shi_04m_m67_a3_001.xlsx_RoiSetAuto-131.zip Distance px	5	2532.12	0.554309	283.752	8.92371	152
	shi_04m_m67_a3_001	shi_04m_m67_a3_001.xlsx_RoiSetAuto-134.zip Distance px	3	2365.24	0.238613	283.752	8.33561	152
	shi_04m_m67_a3_001	shi_04m_m67_a3_001.xlsx_RoiSetAuto-135.zip Distance px	32	3493.01	0.855995	283.752	12.3101	152
	shi_04m_m67_a3_001	shi_04m_m67_a3_001.xlsx_RoiSetAuto-136.zip Distance px	33	3245.45	0.966009	283.752	11.4376	152
	shi_04m_m67_a3_001	shi_04m_m67_a3_001.xlsx_RoiSetAuto-137.zip Distance px	36	3854.66	0.755019	283.752	13.5846	152
	shi_04m_m67_a3_001	shi_04m_m67_a3_001.xlsx_RoiSetAuto-139.zip Distance px	28	4277.21	1.00238	283.752	15.0738	152
	shi_04m_m67_a3_001	shi_04m_m67_a3_001.xlsx_RoiSetAuto-142.zip Distance px	13	2526.26	0.555388	283.752	8.90307	152
	shi_04m_m67_a3_001	shi_04m_m67_a3_001.xlsx_RoiSetAuto-143.zip Distance px	4	2169.89	0.335985	283.752	7.64715	152
	shi_04m_m67_a3_001	shi_04m_m67_a3_001.xlsx_RoiSetAuto-144.zip Distance px	8	2711.96	0.804323	283.752	9.55751	152
	shi_04m_m67_a3_001	shi_04m_m67_a3_001.xlsx_RoiSetAuto-145.zip Distance px	34	2974.66	0.922016	283.752	10.4833	152
	shi_04m_m67_a3_001	shi_04m_m67_a3_001.xlsx_RoiSetAuto-146.zip Distance px	6	2242.99	0.362337	283.752	7.90476	152
	shi_04m_m67_a3_001	shi_04m_m67_a3_001.xlsx_RoiSetAuto-147.zip Distance px	41	3488.58	0.724204	283.752	12.2945	152
	shi_04m_m67_a3_001	shi_04m_m67_a3_001.xlsx_RoiSetAuto-149.zip Distance px	4	2684.19	0.438974	283.752	9.45963	152
	shi_04m_m67_a3_001	shi_04m_m67_a3_001.xlsx_RoiSetAuto-15.zip Distance px	17	4076.69	0.871441	283.752	14.3671	152
	shi_04m_m67_a3_001	shi_04m_m67_a3_001.xlsx_RoiSetAuto-150.zip Distance px	7	3176.38	0.37551	283.752	11.1942	152
	shi_04m_m67_a3_001	shi_04m_m67_a3_001.xlsx_RoiSetAuto-151.zip Distance px	4	1915.42	0.278734	283.752	6.75033	152
	shi_04m_m67_a3_001	shi_04m_m67_a3_001.xlsx_RoiSetAuto-156.zip Distance px	28	2978.94	0.905351	283.752	10.4984	152
	shi_04m_m67_a3_001	shi_04m_m67_a3_001.xlsx_RoiSetAuto-157.zip Distance px	37	2929.91	0.648798	283.752	10.3256	152
	shi_04m_m67_a3_001	shi_04m_m67_a3_001.xlsx_RoiSetAuto-159.zip Distance px	88	4405.67	0.810178	283.752	15.5265	152
	shi_04m_m67_a3_001	shi_04m_m67_a3_001.xlsx_RoiSetAuto-16.zip Distance px	25	4048.13	0.903723	283.752	14.2665	152
	shi_04m_m67_a3_001	shi_04m_m67_a3_001.xlsx_RoiSetAuto-161.zip Distance px	4	2794.22	0.565315	283.752	9.84742	152
	shi_04m_m67_a3_001	shi_04m_m67_a3_001.xlsx_RoiSetAuto-164.zip Distance px	14	2447.84	0.306992	283.752	8.6267	152
	shi_04m_m67_a3_001	shi_04m_m67_a3_001.xlsx_RoiSetAuto-172.zip Distance px	23	3794.3	1.00119	283.752	13.3719	152
	shi_04m_m67_a3_001	shi_04m_m67_a3_001.xlsx_RoiSetAuto-173.zip Distance px	53	3142.99	0.895787	283.752	11.0765	152
	shi_04m_m67_a3_001	shi_04m_m67_a3_001.xlsx_RoiSetAuto-175.zip Distance px	4	2844.87	0.416324	283.752	10.0259	152
	shi_04m_m67_a3_001	shi_04m_m67_a3_001.xlsx_RoiSetAuto-177.zip Distance px	6	2367.13	0.357468	283.752	8.34225	152
	shi_04m_m67_a3_001	shi_04m_m67_a3_001.xlsx_RoiSetAuto-178.zip Distance px	8	2442.04	0.546475	283.752	8.60625	152
	shi_04m_m67_a3_001	shi_04m_m67_a3_001.xlsx_RoiSetAuto-18.zip Distance px	39	2960.28	0.657299	283.752	10.4327	152
	shi_04m_m67_a3_001	shi_04m_m67_a3_001.xlsx_RoiSetAuto-181.zip Distance px	21	3831.82	0.891596	283.752	13.5041	152
	shi_04m_m67_a3_001	shi_04m_m67_a3_001.xlsx_RoiSetAuto-184.zip Distance px	15	2746.41	0.577035	283.752	9.67892	152
	shi_04m_m67_a3_001	shi_04m_m67_a3_001.xlsx_RoiSetAuto-186.zip Distance px	7	3057.23	0.725865	283.752	10.7743	152
	shi_04m_m67_a3_001	shi_04m_m67_a3_001.xlsx_RoiSetAuto-187.zip Distance px	40	3448.18	0.768558	283.752	12.1521	152
	shi_04m_m67_a3_001	shi_04m_m67_a3_001.xlsx_RoiSetAuto-188.zip Distance px	38	3578.12	1.05271	283.752	12.6101	152
	shi_04m_m67_a3_001	shi_04m_m67_a3_001.xlsx_RoiSetAuto-190.zip Distance px	5	3109.33	0.429111	283.752	10.9579	152
	shi_04m_m67_a3_001	shi_04m_m67_a3_001.xlsx_RoiSetAuto-191.zip Distance px	36	3687.28	1.01488	283.752	12.9948	152
	shi_04m_m67_a3_001	shi_04m_m67_a3_001.xlsx_RoiSetAuto-197.zip Distance px	4	2827.33	0.458586	283.752	9.9641	152
	shi_04m_m67_a3_001	shi_04m_m67_a3_001.xlsx_RoiSetAuto-198.zip Distance px	22	3186.02	0.714174	283.752	11.2282	152
	shi_04m_m67_a3_001	shi_04m_m67_a3_001.xlsx_RoiSetAuto-2.zip Distance px	16	2757.34	0.944646	283.752	9.71745	152
	shi_04m_m67_a3_001	shi_04m_m67_a3_001.xlsx_RoiSetAuto-202.zip Distance px	32	4171.7	0.738401	283.752	14.702	152
	shi_04m_m67_a3_001	shi_04m_m67_a3_001.xlsx_RoiSetAuto-203.zip Distance px	14	2767.47	0.936025	283.752	9.75316	152
	shi_04m_m67_a3_001	shi_04m_m67_a3_001.xlsx_RoiSetAuto-206.zip Distance px	5	2494.95	0.652265	283.752	8.79271	152
	shi_04m_m67_a3_001	shi_04m_m67_a3_001.xlsx_RoiSetAuto-209.zip Distance px	8	2624.42	0.437015	283.752	9.249	152
	shi_04m_m67_a3_001	shi_04m_m67_a3_001.xlsx_RoiSetAuto-214.zip Distance px	18	2674.9	0.693591	283.752	9.42691	152
	shi_04m_m67_a3_001	shi_04m_m67_a3_001.xlsx_RoiSetAuto-217.zip Distance px	4	2924.03	0.422392	283.752	10.3049	152
	shi_04m_m67_a3_001	shi_04m_m67_a3_001.xlsx_RoiSetAuto-219.zip Distance px	4	2605.05	0.331158	283.752	9.18075	152
	shi_04m_m67_a3_001	shi_04m_m67_a3_001.xlsx_RoiSetAuto-221.zip Distance px	7	2901.95	0.719773	283.752	10.2271	152
	shi_04m_m67_a3_001	shi_04m_m67_a3_001.xlsx_RoiSetAuto-222.zip Distance px	4	2569.81	0.443607	283.752	9.05656	152
	shi_04m_m67_a3_001	shi_04m_m67_a3_001.xlsx_RoiSetAuto-224.zip Distance px	3	2459.4	0.303502	283.752	8.66743	152
	shi_04m_m67_a3_001	shi_04m_m67_a3_001.xlsx_RoiSetAuto-23.zip Distance px	44	3391.09	0.962792	283.752	11.9509	152
	shi_04m_m67_a3_001	shi_04m_m67_a3_001.xlsx_RoiSetAuto-231.zip Distance px	10	5155.8	0.767917	283.752	18.1701	152
	shi_04m_m67_a3_001	shi_04m_m67_a3_001.xlsx_RoiSetAuto-232.zip Distance px	7	2907.87	0.468037	283.752	10.2479	152
	shi_04m_m67_a3_001	shi_04m_m67_a3_001.xlsx_RoiSetAuto-235.zip Distance px	4	2676.36	0.446827	283.752	9.43205	152
	shi_04m_m67_a3_001	shi_04m_m67_a3_001.xlsx_RoiSetAuto-24.zip Distance px	22	2661.08	0.777505	283.752	9.3782	152
	shi_04m_m67_a3_001	shi_04m_m67_a3_001.xlsx_RoiSetAuto-27.zip Distance px	9	2393.31	0.329211	283.752	8.43454	152
	shi_04m_m67_a3_001	shi_04m_m67_a3_001.xlsx_RoiSetAuto-28.zip Distance px	5	2326.23	0.275898	283.752	8.19813	152
	shi_04m_m67_a3_001	shi_04m_m67_a3_001.xlsx_RoiSetAuto-29.zip Distance px	6	4461.58	0.269956	283.752	15.7235	152
	shi_04m_m67_a3_001	shi_04m_m67_a3_001.xlsx_RoiSetAuto-31.zip Distance px	5	2256.32	0.394529	283.752	7.95174	152
	shi_04m_m67_a3_001	shi_04m_m67_a3_001.xlsx_RoiSetAuto-4.zip Distance px	12	2752.53	0.730565	283.752	9.70051	152
	shi_04m_m67_a3_001	shi_04m_m67_a3_001.xlsx_RoiSetAuto-40.zip Distance px	5	2165.9	0.286442	283.752	7.6331	152
	shi_04m_m67_a3_001	shi_04m_m67_a3_001.xlsx_RoiSetAuto-45.zip Distance px	4	2337.8	0.257623	283.752	8.23891	152
	shi_04m_m67_a3_001	shi_04m_m67_a3_001.xlsx_RoiSetAuto-47.zip Distance px	5	2331.14	0.427828	283.752	8.21543	152
	shi_04m_m67_a3_001	shi_04m_m67_a3_001.xlsx_RoiSetAuto-49.zip Distance px	17	3264.73	0.597736	283.752	11.5056	152
	shi_04m_m67_a3_001	shi_04m_m67_a3_001.xlsx_RoiSetAuto-5.zip Distance px	62	3335.52	0.897824	283.752	11.7551	152
	shi_04m_m67_a3_001	shi_04m_m67_a3_001.xlsx_RoiSetAuto-50.zip Distance px	23	2577.63	0.658211	283.752	9.08411	152
	shi_04m_m67_a3_001	shi_04m_m67_a3_001.xlsx_RoiSetAuto-53.zip Distance px	11	2761.34	0.580669	283.752	9.73154	152
	shi_04m_m67_a3_001	shi_04m_m67_a3_001.xlsx_RoiSetAuto-54.zip Distance px	14	2960.03	0.684341	283.752	10.4318	152
	shi_04m_m67_a3_001	shi_04m_m67_a3_001.xlsx_RoiSetAuto-55.zip Distance px	4	2141.61	0.211695	283.752	7.5475	152
	shi_04m_m67_a3_001	shi_04m_m67_a3_001.xlsx_RoiSetAuto-56.zip Distance px	15	3296.15	0.541576	283.752	11.6163	152
	shi_04m_m67_a3_001	shi_04m_m67_a3_001.xlsx_RoiSetAuto-57.zip Distance px	4	2230.33	0.180006	283.752	7.86016	152
	shi_04m_m67_a3_001	shi_04m_m67_a3_001.xlsx_RoiSetAuto-58.zip Distance px	4	2083.36	0.23508	283.752	7.3422	152
	shi_04m_m67_a3_001	shi_04m_m67_a3_001.xlsx_RoiSetAuto-6.zip Distance px	10	2550.96	0.802437	283.752	8.99011	152
	shi_04m_m67_a3_001	shi_04m_m67_a3_001.xlsx_RoiSetAuto-62.zip Distance px	10	2965.78	0.579399	283.752	10.452	152
	shi_04m_m67_a3_001	shi_04m_m67_a3_001.xlsx_RoiSetAuto-63.zip Distance px	21	2596.29	1.04771	283.752	9.14986	152
	shi_04m_m67_a3_001	shi_04m_m67_a3_001.xlsx_RoiSetAuto-66.zip Distance px	12	2518.55	0.256743	283.752	8.87591	152
	shi_04m_m67_a3_001	shi_04m_m67_a3_001.xlsx_RoiSetAuto-69.zip Distance px	5	3249.08	0.552658	283.752	11.4504	152
	shi_04m_m67_a3_001	shi_04m_m67_a3_001.xlsx_RoiSetAuto-7.zip Distance px	101	3766.77	0.795571	283.752	13.2749	152
	shi_04m_m67_a3_001	shi_04m_m67_a3_001.xlsx_RoiSetAuto-71.zip Distance px	48	4068.84	0.928719	283.752	14.3394	152
	shi_04m_m67_a3_001	shi_04m_m67_a3_001.xlsx_RoiSetAuto-72.zip Distance px	19	3104.77	0.684561	283.752	10.9419	152
	shi_04m_m67_a3_001	shi_04m_m67_a3_001.xlsx_RoiSetAuto-74.zip Distance px	18	3119.43	0.565198	283.752	10.9935	152
	shi_04m_m67_a3_001	shi_04m_m67_a3_001.xlsx_RoiSetAuto-8.zip Distance px	17	3177.75	0.846546	283.752	11.1991	152
	shi_04m_m67_a3_001	shi_04m_m67_a3_001.xlsx_RoiSetAuto-81.zip Distance px	13	2886.23	0.745234	283.752	10.1717	152
	shi_04m_m67_a3_001	shi_04m_m67_a3_001.xlsx_RoiSetAuto-83.zip Distance px	32	5123.21	0.533544	283.752	18.0553	152
	shi_04m_m67_a3_001	shi_04m_m67_a3_001.xlsx_RoiSetAuto-86.zip Distance px	52	3159.83	0.846482	283.752	11.1359	152
	shi_04m_m67_a3_001	shi_04m_m67_a3_001.xlsx_RoiSetAuto-87.zip Distance px	17	2727.64	0.759074	283.752	9.61277	152
	shi_04m_m67_a3_001	shi_04m_m67_a3_001.xlsx_RoiSetAuto-9.zip Distance px	5	3585.09	0.259943	283.752	12.6346	152
	shi_04m_m67_a3_001	shi_04m_m67_a3_001.xlsx_RoiSetAuto-90.zip Distance px	23	3839.1	1.07133	283.752	13.5298	152
	shi_04m_m67_a3_001	shi_04m_m67_a3_001.xlsx_RoiSetAuto-91.zip Distance px	62	4042.39	1.06261	283.752	14.2462	152
	shi_04m_m67_a3_001	shi_04m_m67_a3_001.xlsx_RoiSetAuto-93.zip Distance px	9	3167.93	0.508125	283.752	11.1645	152
	shi_04m_m67_a3_001	shi_04m_m67_a3_001.xlsx_RoiSetAuto-95.zip Distance px	5	2477.16	0.344392	283.752	8.73004	152
	shi_04m_m67_a3_001	shi_04m_m67_a3_001.xlsx_RoiSetAuto-96.zip Distance px	11	3158.39	0.402297	283.752	11.1308	152
	shi_04m_m67_a3_001	shi_04m_m67_a3_001.xlsx_RoiSetAuto-99.zip Distance px	5	2434.85	0.41979	283.752	8.58092	152
	shi_04m_m67_a3_002	shi_04m_m67_a3_002.xlsx_RoiSetAuto-1.zip Distance px	3	2445.1	0.231481	245.973	9.94053	23.9822
[truncated: 1,453 more rows]

## Sheet: PT-NMJ-LiveFormulae
	File	CellArea	Ch1Mean	Ch1CoV	MovieDuration	Duration	Intensity	NormIntRange	Patch/Area	Patch<32/10um/min	Patch/10um2/min	Pct4-28	Pct32-100	>100	Cumulative Actin
Con_01m_m67_a3_001	Con_01m_m67_a3_001_Max_ Reg_ BC_ BC_GB-75.tif	39.4311	497.824	0.4944	211	18.2821	4780.58	0.490204	1.97813	4.6154	5.62502	82.0513	19.2308	#DIV/0!	#DIV/0!
Con_01m_m67_a3_003	Con_01m_m67_a3_003_Max_ Reg_ BC_ BC_GB-75.tif	73.0489	194.854	0.55335	211	16.3704	1807.88	0.586903	1.10885	2.80277	3.15312	88.8889	12.3457	#DIV/0!	#DIV/0!
con_02m_m67_a3_002	con_02m_m67_a3_002_Max_ Reg_ BC_ BC_GB-75.tif	47.3956	276.406	0.59371	211	18.9872	2716.07	0.62896	1.64572	3.83982	4.67978	82.0513	17.9487	#DIV/0!	#DIV/0!
con_03m_m67_a3_001	con_03m_m67_a3_001_Max_ Reg_ BC_ BC_GB-75.tif	117.973	356.482	0.73968	211	19.2688	4097.35	0.82596	0.788314	1.83189	2.24165	81.7204	19.3548
con_03m_m67_a3_002	con_03m_m67_a3_002_Max_ Reg_ BC_ BC_GB-75.tif	46.0267	345.094	0.59997	211	27.9434	3661.42	0.643103	1.15151	2.53305	3.27443	77.3585	24.5283
con_03m_m67_a3_003	con_03m_m67_a3_003_Max_ Reg_ BC_ BC_GB-75.tif	50.7911	309.828	0.5318	211	14.5122	3034.88	0.577106	0.807228	1.95952	2.29543	85.3659	19.5122
con_04m_m67_a3_002	con_04m_m67_a3_002_Max_ Reg_ BC_ BC_GB-75.tif	83.0933	365.882	0.48975	211	22.1091	3321.69	0.556695	1.32381	3.04574	3.7644	80.9091	22.7273
con_04m_m67_a3_003	con_04m_m67_a3_003_Max_ Reg_ BC_ BC_GB-75.tif	50.88	276.526	0.53582	211	14.6322	2808.19	0.652382	1.70991	4.3593	4.86229	89.6552	16.092
con_05m_m67_a3_001	con_05m_m67_a3_001_Max_ Reg_ BC_ BC_GB-75.tif	58.6311	304.82	0.53556	211	16.6486	2872.77	0.563124	1.26213	3.05549	3.58899	85.1351	17.5676
con_06m_m67_a3_001	con_06m_m67_a3_001_Max_ Reg_ BC-1-111_ BC_GB-75.tif	45.8667	411.949	0.5337	111	15.0526	4234.79	0.499578	0.828488	3.88906	4.47832	86.8421	18.4211
con_06m_m67_a3_002	con_06m_m67_a3_002_Max_ Reg_ BC_ BC_GB-75.tif	60.1778	355.508	0.56983	211	19.5755	3883.31	0.610926	1.76145	4.06379	5.00886	81.1321	19.8113
con_07m_m67_a3_001	con_07m_m67_a3_001_Max_ Reg_ BC_ BC_GB-75.tif	42.8267	484.059	0.67617	211	24.0357	5309.06	0.613305	1.3076	2.85511	3.71828	76.7857	25
con_07m_m67_a3_002	con_07m_m67_a3_002_Max_ Reg_ BC_ BC_GB-75.tif	56.2844	303.528	0.60324	211	19.0882	3454.18	0.872886	1.20815	2.87975	3.4355	83.8235	17.6471
con_07m_m67_a3_003	con_07m_m67_a3_003_Max_ Reg_ BC_ BC_GB-75.tif	45.7244	227.988	0.51108	211	19.4925	2283.08	0.580413	1.4653	3.29607	4.16673	79.1045	23.8806
con_08m_m67_a3_002	con_08m_m67_a3_002_Max_ Reg_ BC_ BC_GB-75.tif	89.6711	318.361	0.59238	211	24.9685	3200.2	0.63452	1.41629	3.0443	4.02736	75.5906	26.7717
con_08m_m67_a3_003	con_08m_m67_a3_003_Max_ Reg_ BC_ BC_GB-75.tif	150.418	242.01	0.52199	211	20.3487	2537.97	0.622727	1.01052	2.24966	2.87351	78.2895	24.3421
shi_01m_m67_a3_001	shi_01m_m67_a3_001_Max_ Reg_ BC_ BC_GB-75.tif	86.9511	412.99	0.66992	211	25.26	4943.7	0.607581	0.575036	1.17732	1.63517	72	28
shi_01m_m67_a3_002	shi_01m_m67_a3_002_Max_ Reg_ BC_ BC_GB-75.tif	29.2267	338.849	0.55309	211	23.1667	3791.79	0.509642	1.23175	3.01614	3.50261	86.1111	16.6667
shi_01m_m67_a3_003	shi_01m_m67_a3_003_Max_ Reg_ BC_ BC_GB-75.tif	59.4311	253.177	0.62141	211	18.5185	2814.4	0.685855	0.908615	2.05742	2.58374	79.6296	22.2222
shi_02m_m67_a3_001	shi_02m_m67_a3_001_Max_ Reg_ BC_ BC_GB-75.tif	121.618	303.434	0.70578	211	21.7143	2514.04	0.426911	0.460459	1.12231	1.30936	85.7143	16.0714
shi_02m_m67_a3_003	shi_02m_m67_a3_003_Max_ Reg_ BCcrop_ BC_GB-75.tif	48.2667	221.696	0.26195	211	8.22222	1775.33	0.463189	0.372928	1.00154	1.06046	94.4444	5.55556
shi_03m_m67_a3_001	shi_03m_m67_a3_001_Max_ Reg_ BC_ BC_GB-75.tif	103.893	279.531	0.51845	211	13.9206	2317.84	0.567012	1.21278	3.01074	3.44867	87.3016	12.6984
shi_03m_m67_a3_002	shi_03m_m67_a3_002_Max_ Reg_ BC_ BC_GB-75.tif	112.053	285.326	0.57593	211	10.4957	2470.74	0.505006	1.04415	2.84225	2.96914	95.7265	5.98291
shi_03m_m67_a3_003	shi_03m_m67_a3_003_Max_ Reg_ BC_ BC_GB-75.tif	101.973	349.283	0.41769	211	17.605	3097.11	0.446191	1.16697	2.84435	3.3184	85.7143	16.8067
shi_04m_m67_a3_001	shi_04m_m67_a3_001_Max_ Reg_ BC_ BC_GB-75.tif	152	283.752	0.53608	211	19.036	3053.31	0.612902	0.730263	1.62759	2.07658	78.3784	22.5225
shi_04m_m67_a3_002	shi_04m_m67_a3_002_Max_ Reg_ BC_ BC_GB-75.tif	23.9822	245.973	0.43873	211	10.4706	2272.04	0.537501	1.41772	3.91285	4.03142	97.0588	5.88235
shi_04m_m67_a3_003	shi_04m_m67_a3_003_Max_ Reg_ BC_ BC_GB-75.tif	74.6133	212.7	0.54503	211	15.6423	2036.74	0.607056	1.6485	4.03978	4.68767	86.1789	13.8211
shi_05m_m67_a3_001	shi_05m_m67_a3_001_Max_ Reg_ BC_ BC_GB-75.tif	105.191	256.404	0.42926	211	15.5037	2625.31	0.606012	1.28338	3.21689	3.64942	88.1481	13.3333
shi_05m_m67_a3_002	shi_05m_m67_a3_002_Max_ Reg_ BC_ BC_GB-75.tif	185.778	216.365	0.53233	211	16.6818	2197.32	0.572732	1.06579	2.63271	3.03068	86.8687	15.1515
shi_05m_m67_a3_003	shi_05m_m67_a3_003_Max_ Reg_ BC_ BC_GB-75.tif	48.4089	171.689	0.45106	211	10.4835	1545.74	0.56041	1.87982	4.99301	5.34546	93.4066	6.59341
shi_06m_m67_a3_001	shi_06m_m67_a3_001_Max_ Reg_ BC_ BC_GB-75.tif	166.738	311.31	0.5378	211	19.6758	2897.28	0.539085	1.53534	3.59846	4.36591	82.4219	20.3125
shi_06m_m67_a3_002	shi_06m_m67_a3_002_Max_ Reg_ BC_ BC_GB-75.tif	142.436	175.107	0.52377	211	14.9697	1763.94	0.603642	1.15842	2.87483	3.29408	87.2727	15.1515
shi_06m_m67_a3_003	shi_06m_m67_a3_003_Max_ Reg_ BC_ BC_GB-75.tif	174.009	179.683	0.53388	211	12.6942	1760.46	0.572231	1.39073	3.6442	3.95469	92.1488	8.67769
shi_07m_m67_a3_001	shi_07m_m67_a3_001_Max_ Reg_ BC_ BC_GB-75.tif	78.72	248.785	0.57988	211	16.1417	2352.55	0.605056	1.52439	3.82904	4.33476	88.3333	15.8333
shi_07m_m67_a3_002	shi_07m_m67_a3_002_Max_ Reg_ BC_ BC_GB-75.tif	114.596	273.861	0.6811	211	13.2222	2659.34	0.458132	0.78537	2.05958	2.23328	92.2222	10

## Sheet: PT-NMJ-Values
			69.9156	108.575		343.874	274.326		0.620626	0.622854		14.3479	12.8858		1.60144	1.20668		1.77829	1.30647		0.517148	0.53313		#DIV/0!	#DIV/0!		#DIV/0!	#DIV/0!
File			CellArea	CellArea		GMAMean	GMAMean		GMACoV	GMACoV		Duration	Duration		Patch<32/10um/min	Patch<32/10um/min		Patch/10um2/min	Patch/10um2/min		NormIntRange	NormIntRange
			Control	shiTS		Control	shiTS		Control	shiTS		Control	shiTS		Control	shiTS		Control	shiTS		Control	shiTS		Control	shiTS		Control	shiTS
Con_01m_m67_a3_001_Max_ Reg_ BC.tif	shi_01m_m67_a3_001_Max_ Reg_ BC.tif		58.7911	96.2311		462.413	411.775		0.59804	0.73728		16.3462	13.6889		1.11246	1.21154		1.25757	1.32974		0.465272	0.533047
Con_01m_m67_a3_003_Max_ Reg_ BC.tif	shi_01m_m67_a3_002_Max_ Reg_ BC.tif		71.9822	30.7378		209.062	343.773		0.61654	0.64858		18.3846	14.65		0.75058	1.66521		1.02711	1.85023		0.66725	0.542043
con_02m_m67_a3_002_Max_ Reg_ BC.tif	shi_01m_m67_a3_003_Max_ Reg_ BC.tif		46.0089	58.6489		295.648	265.891		0.64644	0.67956		11.55	13.5893		2.2868	2.42426		2.47222	2.71517		0.509875	0.577916
con_03m_m67_a3_001_Max_ Reg_ BC.tif	shi_02m_m67_a3_001_Max_ Reg_ BC.tif		135.804	117.956		343.89	323.011		0.74964	0.73967		12.5882	20.1316		1.65418	0.771437		1.77981	0.916081		0.515405	0.53668
con_03m_m67_a3_002_Max_ Reg_ BC.tif	shi_02m_m67_a3_003_Max_ Reg_ BC.tif		45.0844	117.671		363.934	228.088		0.66627	0.39295		17.5			2.58598	0		2.90135	0		0.506591
con_03m_m67_a3_003_Max_ Reg_ BC.tif	shi_03m_m67_a3_001_Max_ Reg_ BC.tif		59.5733	112.658		313.784	279.6		0.58407	0.63223		11.1333	10.3846		0.722844	0.95916		0.722844	0.984401		0.548642	0.57814
con_04m_m67_a3_002_Max_ Reg_ BC.tif	shi_03m_m67_a3_002_Max_ Reg_ BC.tif		105.707	114.133		371.501	294.453		0.54266	0.64706		12.7091	10.3214		1.29124	1.32048		1.47955	1.39523		0.44126	0.472497
con_04m_m67_a3_003_Max_ Reg_ BC.tif	shi_03m_m67_a3_003_Max_ Reg_ BC.tif		50.0089	99.5733		292.298	368.586		0.61021	0.47583		12.0769	20.5455		1.36469	0.542599		1.47841	0.628273		0.499925	0.429978
con_05m_m67_a3_001_Max_ Reg_ BC.tif	shi_04m_m67_a3_001_Max_ Reg_ BC.tif		55.5556	152.764		328.997	298.074		0.58754	0.6155		12	9.77215		1.99621	1.39607		2.14976	1.47053		0.499691	0.466192
con_06m_m67_a3_001_Max_ Reg_ BC.tif	shi_04m_m67_a3_002_Max_ Reg_ BC.tif		43.7333	30.1689		442.087	238.554		0.56996	0.57195		11.86	7.6875		3.15549	1.5081		3.42988	1.5081		0.490278	0.520877
con_06m_m67_a3_002_Max_ Reg_ BC.tif	shi_04m_m67_a3_003_Max_ Reg_ BC.tif		46.0978	88.4622		431.483	208.281		0.52764	0.66703		13.5714	12.8033		1.60384	1.80011		1.72722	1.96083		0.493555	0.617787
con_07m_m67_a3_001_Max_ Reg_ BC.tif	shi_05m_m67_a3_001_Max_ Reg_ BC.tif		41.3156	110.044		516.063	265.921		0.74252	0.53217		22.1875	8.37143		0.894743	0.878577		1.10122	0.904417		0.601558	0.476737
con_07m_m67_a3_002_Max_ Reg_ BC.tif	shi_05m_m67_a3_002_Max_ Reg_ BC.tif		62.2578	202.311		310.602	220.592		0.61976	0.64572		13.6863	13.6373		2.05536	1.27906		2.32941	1.43367		0.49233	0.583496
con_07m_m67_a3_003_Max_ Reg_ BC.tif	shi_05m_m67_a3_003_Max_ Reg_ BC.tif		44.0533	48.16		245.951	186.29		0.57802	0.57475		14.2759	13.0526		1.74283	1.00376		1.87192	1.12185		0.44635	0.559808
con_08m_m67_a3_002_Max_ Reg_ BC.tif	shi_06m_m67_a3_001_Max_ Reg_ BC.tif		90.4178	163.804		330.073	342.097		0.66147	0.62645		15.3704	11.1333		0.723341	1.78805		0.849139	1.82277		0.520955	0.490284
con_08m_m67_a3_003_Max_ Reg_ BC.tif	shi_06m_m67_a3_002_Max_ Reg_ BC.tif		162.258	147.698		244.201	185.501		0.62923	0.64166		14.3271	10.1385		1.68242	1.21293		1.8752	1.25143		0.575437	0.574096
	shi_06m_m67_a3_003_Max_ Reg_ BC.tif			178.471			190.846			0.63264			12.0896			0.955987			1.06752			0.554014
	shi_07m_m67_a3_001_Max_ Reg_ BC.tif			79.8756			265.884			0.65474			13.3396			1.70882			1.88682			0.505847
	shi_07m_m67_a3_002_Max_ Reg_ BC.tif			113.564			294.978			0.71846			16.6087			0.500791			0.57591			0.576904
	File	CellArea	Ch1Mean	Ch1CoV	MovieDuration	Duration	Intensity	NormIntRange	Patch/Area	Patch<32/10um/min	Patch/10um2/min	Pct4-28	Pct32-100	>100	Cumulative Actin
					211		6001.86		0.442244			88.4615	11.5385	#DIV/0!	#DIV/0!
					211		2734.81		0.3612			73.0769	26.9231	#DIV/0!	#DIV/0!
					211		3962.04		0.869397			92.5	7.5	#DIV/0!	#DIV/0!
					211		4727.74		0.6259			92.9412	7.05882
					211		5334.11		1.02031			89.1304	10.8696
					209		4591.66		0.251791			100	6.66667
					211		4871.47		0.520308			87.2727	12.7273
					211		4064.37		0.519908			92.3077	11.5385
					211		4370.69		0.756			92.8571	7.14286
					200		6300.76		1.14329			92	12
					211		6121.28		0.607405			92.8571	14.2857
					211		7806.59		0.387263			81.25	18.75
					211		4212.88		0.819175			88.2353	15.6863
					211		3268.18		0.658293			93.1034	6.89655
					211		4897.61		0.298614			85.1852	14.8148
					211		3476.33		0.659444			89.7196	10.2804
					211		6253.33		0.467624			91.1111	11.1111
					211		4398.71		0.650665			90	15
					211		3706.98		0.954835			89.2857	12.5
					211		4756.64		0.322155			84.2105	15.7895
					211				0
					211		3801.67		0.346181			97.4359	2.5641
					211		3963.14		0.490654			94.6429	5.35714
					211		5427.9		0.220943			86.3636	13.6364
					211		3929.45		0.517136			94.9367	7.59494
					211		3259.96		0.530348			100	0
					211		2754.17		0.68956			91.8033	9.83607
					211		3362.38		0.318053			97.1429	2.85714
					211		3075.58		0.504174			89.2157	10.7843
					211		2649.42		0.394518			89.4737	10.5263
					211		4669.28		0.641008			98.0952	5.71429
					211		2576.22		0.440088			96.9231	4.61538
					211		2800.48		0.375411			89.5522	11.9403
					211		3630.34		0.663532			90.566	11.3208
					211		4476.08		0.202528			86.9565	17.3913

## Sheet: PooledPTDataValues
	File	File		Duration	Duration
	Con	ShiTS		Con	ShiTS
	Con_01m_m67_a3_001_Max_ Reg.xlsx_RoiSetAuto-1.zip Distance px	shi_01m_m67_a3_001_Max_ Reg.xlsx_RoiSetAuto-10.zip Distance px		5	32
	Con_01m_m67_a3_001_Max_ Reg.xlsx_RoiSetAuto-10.zip Distance px	shi_01m_m67_a3_001_Max_ Reg.xlsx_RoiSetAuto-13.zip Distance px		17	13
	Con_01m_m67_a3_001_Max_ Reg.xlsx_RoiSetAuto-12.zip Distance px	shi_01m_m67_a3_001_Max_ Reg.xlsx_RoiSetAuto-15.zip Distance px		4	5
	Con_01m_m67_a3_001_Max_ Reg.xlsx_RoiSetAuto-13.zip Distance px	shi_01m_m67_a3_001_Max_ Reg.xlsx_RoiSetAuto-16.zip Distance px		39	7
	Con_01m_m67_a3_001_Max_ Reg.xlsx_RoiSetAuto-14.zip Distance px	shi_01m_m67_a3_001_Max_ Reg.xlsx_RoiSetAuto-18.zip Distance px		4	14
	Con_01m_m67_a3_001_Max_ Reg.xlsx_RoiSetAuto-15.zip Distance px	shi_01m_m67_a3_001_Max_ Reg.xlsx_RoiSetAuto-19.zip Distance px		19	6
	Con_01m_m67_a3_001_Max_ Reg.xlsx_RoiSetAuto-16.zip Distance px	shi_01m_m67_a3_001_Max_ Reg.xlsx_RoiSetAuto-2.zip Distance px		23	9
	Con_01m_m67_a3_001_Max_ Reg.xlsx_RoiSetAuto-17.zip Distance px	shi_01m_m67_a3_001_Max_ Reg.xlsx_RoiSetAuto-20.zip Distance px		5	9
	Con_01m_m67_a3_001_Max_ Reg.xlsx_RoiSetAuto-18.zip Distance px	shi_01m_m67_a3_001_Max_ Reg.xlsx_RoiSetAuto-21.zip Distance px		5	14
	Con_01m_m67_a3_001_Max_ Reg.xlsx_RoiSetAuto-19.zip Distance px	shi_01m_m67_a3_001_Max_ Reg.xlsx_RoiSetAuto-22.zip Distance px		17	22
	Con_01m_m67_a3_001_Max_ Reg.xlsx_RoiSetAuto-20.zip Distance px	shi_01m_m67_a3_001_Max_ Reg.xlsx_RoiSetAuto-23.zip Distance px		14	12
	Con_01m_m67_a3_001_Max_ Reg.xlsx_RoiSetAuto-21.zip Distance px	shi_01m_m67_a3_001_Max_ Reg.xlsx_RoiSetAuto-25.zip Distance px		23	6
	Con_01m_m67_a3_001_Max_ Reg.xlsx_RoiSetAuto-22.zip Distance px	shi_01m_m67_a3_001_Max_ Reg.xlsx_RoiSetAuto-27.zip Distance px		10	15
	Con_01m_m67_a3_001_Max_ Reg.xlsx_RoiSetAuto-23.zip Distance px	shi_01m_m67_a3_001_Max_ Reg.xlsx_RoiSetAuto-28.zip Distance px		4	8
	Con_01m_m67_a3_001_Max_ Reg.xlsx_RoiSetAuto-26.zip Distance px	shi_01m_m67_a3_001_Max_ Reg.xlsx_RoiSetAuto-3.zip Distance px		12	6
	Con_01m_m67_a3_001_Max_ Reg.xlsx_RoiSetAuto-27.zip Distance px	shi_01m_m67_a3_001_Max_ Reg.xlsx_RoiSetAuto-30.zip Distance px		7	19
	Con_01m_m67_a3_001_Max_ Reg.xlsx_RoiSetAuto-28.zip Distance px	shi_01m_m67_a3_001_Max_ Reg.xlsx_RoiSetAuto-32.zip Distance px		4	4
	Con_01m_m67_a3_001_Max_ Reg.xlsx_RoiSetAuto-29.zip Distance px	shi_01m_m67_a3_001_Max_ Reg.xlsx_RoiSetAuto-33.zip Distance px		5	7
	Con_01m_m67_a3_001_Max_ Reg.xlsx_RoiSetAuto-3.zip Distance px	shi_01m_m67_a3_001_Max_ Reg.xlsx_RoiSetAuto-34.zip Distance px		64	35
	Con_01m_m67_a3_001_Max_ Reg.xlsx_RoiSetAuto-30.zip Distance px	shi_01m_m67_a3_001_Max_ Reg.xlsx_RoiSetAuto-35.zip Distance px		11	12
	Con_01m_m67_a3_001_Max_ Reg.xlsx_RoiSetAuto-31.zip Distance px	shi_01m_m67_a3_001_Max_ Reg.xlsx_RoiSetAuto-38.zip Distance px		12	8
	Con_01m_m67_a3_001_Max_ Reg.xlsx_RoiSetAuto-4.zip Distance px	shi_01m_m67_a3_001_Max_ Reg.xlsx_RoiSetAuto-39.zip Distance px		101	7
	Con_01m_m67_a3_001_Max_ Reg.xlsx_RoiSetAuto-5.zip Distance px	shi_01m_m67_a3_001_Max_ Reg.xlsx_RoiSetAuto-4.zip Distance px		5	50
	Con_01m_m67_a3_001_Max_ Reg.xlsx_RoiSetAuto-6.zip Distance px	shi_01m_m67_a3_001_Max_ Reg.xlsx_RoiSetAuto-40.zip Distance px		4	4
	Con_01m_m67_a3_001_Max_ Reg.xlsx_RoiSetAuto-7.zip Distance px	shi_01m_m67_a3_001_Max_ Reg.xlsx_RoiSetAuto-43.zip Distance px		6	11
	Con_01m_m67_a3_001_Max_ Reg.xlsx_RoiSetAuto-8.zip Distance px	shi_01m_m67_a3_001_Max_ Reg.xlsx_RoiSetAuto-44.zip Distance px		5	6
	Con_01m_m67_a3_003_Max_ Reg.xlsx_RoiSetAuto-1.zip Distance px	shi_01m_m67_a3_001_Max_ Reg.xlsx_RoiSetAuto-45.zip Distance px		39	6
	Con_01m_m67_a3_003_Max_ Reg.xlsx_RoiSetAuto-10.zip Distance px	shi_01m_m67_a3_001_Max_ Reg.xlsx_RoiSetAuto-46.zip Distance px		11	14
	Con_01m_m67_a3_003_Max_ Reg.xlsx_RoiSetAuto-11.zip Distance px	shi_01m_m67_a3_001_Max_ Reg.xlsx_RoiSetAuto-47.zip Distance px		6	6
	Con_01m_m67_a3_003_Max_ Reg.xlsx_RoiSetAuto-12.zip Distance px	shi_01m_m67_a3_001_Max_ Reg.xlsx_RoiSetAuto-49.zip Distance px		4	58
	Con_01m_m67_a3_003_Max_ Reg.xlsx_RoiSetAuto-13.zip Distance px	shi_01m_m67_a3_001_Max_ Reg.xlsx_RoiSetAuto-5.zip Distance px		8	10
	Con_01m_m67_a3_003_Max_ Reg.xlsx_RoiSetAuto-14.zip Distance px	shi_01m_m67_a3_001_Max_ Reg.xlsx_RoiSetAuto-50.zip Distance px		7	24
	Con_01m_m67_a3_003_Max_ Reg.xlsx_RoiSetAuto-15.zip Distance px	shi_01m_m67_a3_001_Max_ Reg.xlsx_RoiSetAuto-51.zip Distance px		77	5
	Con_01m_m67_a3_003_Max_ Reg.xlsx_RoiSetAuto-16.zip Distance px	shi_01m_m67_a3_001_Max_ Reg.xlsx_RoiSetAuto-53.zip Distance px		4	7
	Con_01m_m67_a3_003_Max_ Reg.xlsx_RoiSetAuto-18.zip Distance px	shi_01m_m67_a3_001_Max_ Reg.xlsx_RoiSetAuto-54.zip Distance px		45	19
	Con_01m_m67_a3_003_Max_ Reg.xlsx_RoiSetAuto-19.zip Distance px	shi_01m_m67_a3_001_Max_ Reg.xlsx_RoiSetAuto-55.zip Distance px		4	9
	Con_01m_m67_a3_003_Max_ Reg.xlsx_RoiSetAuto-2.zip Distance px	shi_01m_m67_a3_001_Max_ Reg.xlsx_RoiSetAuto-59.zip Distance px		4	5
	Con_01m_m67_a3_003_Max_ Reg.xlsx_RoiSetAuto-20.zip Distance px	shi_01m_m67_a3_001_Max_ Reg.xlsx_RoiSetAuto-62.zip Distance px		6	4
	Con_01m_m67_a3_003_Max_ Reg.xlsx_RoiSetAuto-22.zip Distance px	shi_01m_m67_a3_001_Max_ Reg.xlsx_RoiSetAuto-63.zip Distance px		4	12
	Con_01m_m67_a3_003_Max_ Reg.xlsx_RoiSetAuto-23.zip Distance px	shi_01m_m67_a3_001_Max_ Reg.xlsx_RoiSetAuto-64.zip Distance px		4	8
	Con_01m_m67_a3_003_Max_ Reg.xlsx_RoiSetAuto-24.zip Distance px	shi_01m_m67_a3_001_Max_ Reg.xlsx_RoiSetAuto-67.zip Distance px		5	28
	Con_01m_m67_a3_003_Max_ Reg.xlsx_RoiSetAuto-25.zip Distance px	shi_01m_m67_a3_001_Max_ Reg.xlsx_RoiSetAuto-68.zip Distance px		19	10
	Con_01m_m67_a3_003_Max_ Reg.xlsx_RoiSetAuto-26.zip Distance px	shi_01m_m67_a3_001_Max_ Reg.xlsx_RoiSetAuto-69.zip Distance px		4	14
	Con_01m_m67_a3_003_Max_ Reg.xlsx_RoiSetAuto-27.zip Distance px	shi_01m_m67_a3_001_Max_ Reg.xlsx_RoiSetAuto-7.zip Distance px		9	6
	Con_01m_m67_a3_003_Max_ Reg.xlsx_RoiSetAuto-28.zip Distance px	shi_01m_m67_a3_001_Max_ Reg.xlsx_RoiSetAuto-9.zip Distance px		38	30
	Con_01m_m67_a3_003_Max_ Reg.xlsx_RoiSetAuto-3.zip Distance px	shi_01m_m67_a3_002_Max_ Reg.xlsx_RoiSetAuto-10.zip Distance px		43	11
	Con_01m_m67_a3_003_Max_ Reg.xlsx_RoiSetAuto-30.zip Distance px	shi_01m_m67_a3_002_Max_ Reg.xlsx_RoiSetAuto-12.zip Distance px		4	8
	Con_01m_m67_a3_003_Max_ Reg.xlsx_RoiSetAuto-32.zip Distance px	shi_01m_m67_a3_002_Max_ Reg.xlsx_RoiSetAuto-13.zip Distance px		6	6
	Con_01m_m67_a3_003_Max_ Reg.xlsx_RoiSetAuto-4.zip Distance px	shi_01m_m67_a3_002_Max_ Reg.xlsx_RoiSetAuto-14.zip Distance px		45	7
	Con_01m_m67_a3_003_Max_ Reg.xlsx_RoiSetAuto-5.zip Distance px	shi_01m_m67_a3_002_Max_ Reg.xlsx_RoiSetAuto-15.zip Distance px		55	7
	Con_01m_m67_a3_003_Max_ Reg.xlsx_RoiSetAuto-6.zip Distance px	shi_01m_m67_a3_002_Max_ Reg.xlsx_RoiSetAuto-16.zip Distance px		5	7
	Con_01m_m67_a3_003_Max_ Reg.xlsx_RoiSetAuto-8.zip Distance px	shi_01m_m67_a3_002_Max_ Reg.xlsx_RoiSetAuto-17.zip Distance px		22	6
	con_02m_m67_a3_002_Max_ Reg.xlsx_RoiSetAuto-1.zip Distance px	shi_01m_m67_a3_002_Max_ Reg.xlsx_RoiSetAuto-2.zip Distance px		9	32
	con_02m_m67_a3_002_Max_ Reg.xlsx_RoiSetAuto-10.zip Distance px	shi_01m_m67_a3_002_Max_ Reg.xlsx_RoiSetAuto-20.zip Distance px		4	7
	con_02m_m67_a3_002_Max_ Reg.xlsx_RoiSetAuto-11.zip Distance px	shi_01m_m67_a3_002_Max_ Reg.xlsx_RoiSetAuto-22.zip Distance px		5	14
	con_02m_m67_a3_002_Max_ Reg.xlsx_RoiSetAuto-12.zip Distance px	shi_01m_m67_a3_002_Max_ Reg.xlsx_RoiSetAuto-23.zip Distance px		4	30
	con_02m_m67_a3_002_Max_ Reg.xlsx_RoiSetAuto-13.zip Distance px	shi_01m_m67_a3_002_Max_ Reg.xlsx_RoiSetAuto-24.zip Distance px		4	5
	con_02m_m67_a3_002_Max_ Reg.xlsx_RoiSetAuto-14.zip Distance px	shi_01m_m67_a3_002_Max_ Reg.xlsx_RoiSetAuto-26.zip Distance px		7	10
	con_02m_m67_a3_002_Max_ Reg.xlsx_RoiSetAuto-15.zip Distance px	shi_01m_m67_a3_002_Max_ Reg.xlsx_RoiSetAuto-29.zip Distance px		4	6
	con_02m_m67_a3_002_Max_ Reg.xlsx_RoiSetAuto-16.zip Distance px	shi_01m_m67_a3_002_Max_ Reg.xlsx_RoiSetAuto-34.zip Distance px		4	11
	con_02m_m67_a3_002_Max_ Reg.xlsx_RoiSetAuto-17.zip Distance px	shi_01m_m67_a3_002_Max_ Reg.xlsx_RoiSetAuto-35.zip Distance px		9	23
	con_02m_m67_a3_002_Max_ Reg.xlsx_RoiSetAuto-19.zip Distance px	shi_01m_m67_a3_002_Max_ Reg.xlsx_RoiSetAuto-36.zip Distance px		6	10
	con_02m_m67_a3_002_Max_ Reg.xlsx_RoiSetAuto-2.zip Distance px	shi_01m_m67_a3_002_Max_ Reg.xlsx_RoiSetAuto-38.zip Distance px		8	18
	con_02m_m67_a3_002_Max_ Reg.xlsx_RoiSetAuto-20.zip Distance px	shi_01m_m67_a3_002_Max_ Reg.xlsx_RoiSetAuto-5.zip Distance px		4	71
	con_02m_m67_a3_002_Max_ Reg.xlsx_RoiSetAuto-21.zip Distance px	shi_01m_m67_a3_002_Max_ Reg.xlsx_RoiSetAuto-8.zip Distance px		4	4
	con_02m_m67_a3_002_Max_ Reg.xlsx_RoiSetAuto-22.zip Distance px	shi_01m_m67_a3_003_Max_ Reg.xlsx_RoiSetAuto-10.zip Distance px		4	29
	con_02m_m67_a3_002_Max_ Reg.xlsx_RoiSetAuto-23.zip Distance px	shi_01m_m67_a3_003_Max_ Reg.xlsx_RoiSetAuto-11.zip Distance px		4	14
	con_02m_m67_a3_002_Max_ Reg.xlsx_RoiSetAuto-24.zip Distance px	shi_01m_m67_a3_003_Max_ Reg.xlsx_RoiSetAuto-12.zip Distance px		17	8
	con_02m_m67_a3_002_Max_ Reg.xlsx_RoiSetAuto-25.zip Distance px	shi_01m_m67_a3_003_Max_ Reg.xlsx_RoiSetAuto-13.zip Distance px		57	40
	con_02m_m67_a3_002_Max_ Reg.xlsx_RoiSetAuto-26.zip Distance px	shi_01m_m67_a3_003_Max_ Reg.xlsx_RoiSetAuto-14.zip Distance px		6	8
	con_02m_m67_a3_002_Max_ Reg.xlsx_RoiSetAuto-27.zip Distance px	shi_01m_m67_a3_003_Max_ Reg.xlsx_RoiSetAuto-15.zip Distance px		14	6
	con_02m_m67_a3_002_Max_ Reg.xlsx_RoiSetAuto-28.zip Distance px	shi_01m_m67_a3_003_Max_ Reg.xlsx_RoiSetAuto-16.zip Distance px		23	12
	con_02m_m67_a3_002_Max_ Reg.xlsx_RoiSetAuto-29.zip Distance px	shi_01m_m67_a3_003_Max_ Reg.xlsx_RoiSetAuto-17.zip Distance px		6	6
	con_02m_m67_a3_002_Max_ Reg.xlsx_RoiSetAuto-3.zip Distance px	shi_01m_m67_a3_003_Max_ Reg.xlsx_RoiSetAuto-18.zip Distance px		15	5
	con_02m_m67_a3_002_Max_ Reg.xlsx_RoiSetAuto-30.zip Distance px	shi_01m_m67_a3_003_Max_ Reg.xlsx_RoiSetAuto-19.zip Distance px		14	6
	con_02m_m67_a3_002_Max_ Reg.xlsx_RoiSetAuto-31.zip Distance px	shi_01m_m67_a3_003_Max_ Reg.xlsx_RoiSetAuto-2.zip Distance px		16	5
	con_02m_m67_a3_002_Max_ Reg.xlsx_RoiSetAuto-32.zip Distance px	shi_01m_m67_a3_003_Max_ Reg.xlsx_RoiSetAuto-20.zip Distance px		5	25
	con_02m_m67_a3_002_Max_ Reg.xlsx_RoiSetAuto-33.zip Distance px	shi_01m_m67_a3_003_Max_ Reg.xlsx_RoiSetAuto-21.zip Distance px		4	12
	con_02m_m67_a3_002_Max_ Reg.xlsx_RoiSetAuto-34.zip Distance px	shi_01m_m67_a3_003_Max_ Reg.xlsx_RoiSetAuto-22.zip Distance px		5	27
	con_02m_m67_a3_002_Max_ Reg.xlsx_RoiSetAuto-35.zip Distance px	shi_01m_m67_a3_003_Max_ Reg.xlsx_RoiSetAuto-23.zip Distance px		13	4
	con_02m_m67_a3_002_Max_ Reg.xlsx_RoiSetAuto-36.zip Distance px	shi_01m_m67_a3_003_Max_ Reg.xlsx_RoiSetAuto-24.zip Distance px		4	13
	con_02m_m67_a3_002_Max_ Reg.xlsx_RoiSetAuto-37.zip Distance px	shi_01m_m67_a3_003_Max_ Reg.xlsx_RoiSetAuto-25.zip Distance px		17	15
	con_02m_m67_a3_002_Max_ Reg.xlsx_RoiSetAuto-38.zip Distance px	shi_01m_m67_a3_003_Max_ Reg.xlsx_RoiSetAuto-26.zip Distance px		4	8
	con_02m_m67_a3_002_Max_ Reg.xlsx_RoiSetAuto-39.zip Distance px	shi_01m_m67_a3_003_Max_ Reg.xlsx_RoiSetAuto-27.zip Distance px		5	11
	con_02m_m67_a3_002_Max_ Reg.xlsx_RoiSetAuto-4.zip Distance px	shi_01m_m67_a3_003_Max_ Reg.xlsx_RoiSetAuto-28.zip Distance px		12	6
	con_02m_m67_a3_002_Max_ Reg.xlsx_RoiSetAuto-40.zip Distance px	shi_01m_m67_a3_003_Max_ Reg.xlsx_RoiSetAuto-29.zip Distance px		6	12
	con_02m_m67_a3_002_Max_ Reg.xlsx_RoiSetAuto-41.zip Distance px	shi_01m_m67_a3_003_Max_ Reg.xlsx_RoiSetAuto-3.zip Distance px		5	36
	con_02m_m67_a3_002_Max_ Reg.xlsx_RoiSetAuto-42.zip Distance px	shi_01m_m67_a3_003_Max_ Reg.xlsx_RoiSetAuto-30.zip Distance px		6	11
	con_02m_m67_a3_002_Max_ Reg.xlsx_RoiSetAuto-5.zip Distance px	shi_01m_m67_a3_003_Max_ Reg.xlsx_RoiSetAuto-31.zip Distance px		49	11
	con_02m_m67_a3_002_Max_ Reg.xlsx_RoiSetAuto-6.zip Distance px	shi_01m_m67_a3_003_Max_ Reg.xlsx_RoiSetAuto-32.zip Distance px		53	4
	con_02m_m67_a3_002_Max_ Reg.xlsx_RoiSetAuto-7.zip Distance px	shi_01m_m67_a3_003_Max_ Reg.xlsx_RoiSetAuto-33.zip Distance px		13	6
	con_02m_m67_a3_002_Max_ Reg.xlsx_RoiSetAuto-9.zip Distance px	shi_01m_m67_a3_003_Max_ Reg.xlsx_RoiSetAuto-34.zip Distance px		13	4
	con_03m_m67_a3_001_Max_ Reg.xlsx_RoiSetAuto-1.zip Distance px	shi_01m_m67_a3_003_Max_ Reg.xlsx_RoiSetAuto-35.zip Distance px		35	6
	con_03m_m67_a3_001_Max_ Reg.xlsx_RoiSetAuto-10.zip Distance px	shi_01m_m67_a3_003_Max_ Reg.xlsx_RoiSetAuto-36.zip Distance px		12	16
	con_03m_m67_a3_001_Max_ Reg.xlsx_RoiSetAuto-11.zip Distance px	shi_01m_m67_a3_003_Max_ Reg.xlsx_RoiSetAuto-37.zip Distance px		7	4
	con_03m_m67_a3_001_Max_ Reg.xlsx_RoiSetAuto-12.zip Distance px	shi_01m_m67_a3_003_Max_ Reg.xlsx_RoiSetAuto-38.zip Distance px		9	26
	con_03m_m67_a3_001_Max_ Reg.xlsx_RoiSetAuto-13.zip Distance px	shi_01m_m67_a3_003_Max_ Reg.xlsx_RoiSetAuto-39.zip Distance px		24	23
	con_03m_m67_a3_001_Max_ Reg.xlsx_RoiSetAuto-14.zip Distance px	shi_01m_m67_a3_003_Max_ Reg.xlsx_RoiSetAuto-40.zip Distance px		17	4
	con_03m_m67_a3_001_Max_ Reg.xlsx_RoiSetAuto-15.zip Distance px	shi_01m_m67_a3_003_Max_ Reg.xlsx_RoiSetAuto-41.zip Distance px		4	5
	con_03m_m67_a3_001_Max_ Reg.xlsx_RoiSetAuto-16.zip Distance px	shi_01m_m67_a3_003_Max_ Reg.xlsx_RoiSetAuto-42.zip Distance px		8	4
	con_03m_m67_a3_001_Max_ Reg.xlsx_RoiSetAuto-17.zip Distance px	shi_01m_m67_a3_003_Max_ Reg.xlsx_RoiSetAuto-43.zip Distance px		4	6
	con_03m_m67_a3_001_Max_ Reg.xlsx_RoiSetAuto-18.zip Distance px	shi_01m_m67_a3_003_Max_ Reg.xlsx_RoiSetAuto-44.zip Distance px		4	4
	con_03m_m67_a3_001_Max_ Reg.xlsx_RoiSetAuto-19.zip Distance px	shi_01m_m67_a3_003_Max_ Reg.xlsx_RoiSetAuto-45.zip Distance px		33	4
	con_03m_m67_a3_001_Max_ Reg.xlsx_RoiSetAuto-2.zip Distance px	shi_01m_m67_a3_003_Max_ Reg.xlsx_RoiSetAuto-46.zip Distance px		5	4
	con_03m_m67_a3_001_Max_ Reg.xlsx_RoiSetAuto-20.zip Distance px	shi_01m_m67_a3_003_Max_ Reg.xlsx_RoiSetAuto-47.zip Distance px		9	19
	con_03m_m67_a3_001_Max_ Reg.xlsx_RoiSetAuto-22.zip Distance px	shi_01m_m67_a3_003_Max_ Reg.xlsx_RoiSetAuto-48.zip Distance px		4	4
	con_03m_m67_a3_001_Max_ Reg.xlsx_RoiSetAuto-23.zip Distance px	shi_01m_m67_a3_003_Max_ Reg.xlsx_RoiSetAuto-49.zip Distance px		6	61
	con_03m_m67_a3_001_Max_ Reg.xlsx_RoiSetAuto-24.zip Distance px	shi_01m_m67_a3_003_Max_ Reg.xlsx_RoiSetAuto-5.zip Distance px		6	61
	con_03m_m67_a3_001_Max_ Reg.xlsx_RoiSetAuto-25.zip Distance px	shi_01m_m67_a3_003_Max_ Reg.xlsx_RoiSetAuto-50.zip Distance px		4	8
	con_03m_m67_a3_001_Max_ Reg.xlsx_RoiSetAuto-27.zip Distance px	shi_01m_m67_a3_003_Max_ Reg.xlsx_RoiSetAuto-51.zip Distance px		7	4
	con_03m_m67_a3_001_Max_ Reg.xlsx_RoiSetAuto-28.zip Distance px	shi_01m_m67_a3_003_Max_ Reg.xlsx_RoiSetAuto-52.zip Distance px		8	8
	con_03m_m67_a3_001_Max_ Reg.xlsx_RoiSetAuto-3.zip Distance px	shi_01m_m67_a3_003_Max_ Reg.xlsx_RoiSetAuto-53.zip Distance px		5	22
	con_03m_m67_a3_001_Max_ Reg.xlsx_RoiSetAuto-31.zip Distance px	shi_01m_m67_a3_003_Max_ Reg.xlsx_RoiSetAuto-54.zip Distance px		22	8
	con_03m_m67_a3_001_Max_ Reg.xlsx_RoiSetAuto-32.zip Distance px	shi_01m_m67_a3_003_Max_ Reg.xlsx_RoiSetAuto-55.zip Distance px		21	6
	con_03m_m67_a3_001_Max_ Reg.xlsx_RoiSetAuto-33.zip Distance px	shi_01m_m67_a3_003_Max_ Reg.xlsx_RoiSetAuto-56.zip Distance px		13	14
	con_03m_m67_a3_001_Max_ Reg.xlsx_RoiSetAuto-34.zip Distance px	shi_01m_m67_a3_003_Max_ Reg.xlsx_RoiSetAuto-57.zip Distance px		13	6
	con_03m_m67_a3_001_Max_ Reg.xlsx_RoiSetAuto-36.zip Distance px	shi_01m_m67_a3_003_Max_ Reg.xlsx_RoiSetAuto-58.zip Distance px		4	4
	con_03m_m67_a3_001_Max_ Reg.xlsx_RoiSetAuto-37.zip Distance px	shi_01m_m67_a3_003_Max_ Reg.xlsx_RoiSetAuto-6.zip Distance px		6	7
	con_03m_m67_a3_001_Max_ Reg.xlsx_RoiSetAuto-38.zip Distance px	shi_01m_m67_a3_003_Max_ Reg.xlsx_RoiSetAuto-7.zip Distance px		45	36
	con_03m_m67_a3_001_Max_ Reg.xlsx_RoiSetAuto-4.zip Distance px	shi_01m_m67_a3_003_Max_ Reg.xlsx_RoiSetAuto-8.zip Distance px		18	4
	con_03m_m67_a3_001_Max_ Reg.xlsx_RoiSetAuto-40.zip Distance px	shi_01m_m67_a3_003_Max_ Reg.xlsx_RoiSetAuto-9.zip Distance px		4	39
	con_03m_m67_a3_001_Max_ Reg.xlsx_RoiSetAuto-41.zip Distance px	shi_02m_m67_a3_001_Max_ Reg.xlsx_RoiSetAuto-10.zip Distance px		12	16
	con_03m_m67_a3_001_Max_ Reg.xlsx_RoiSetAuto-42.zip Distance px	shi_02m_m67_a3_001_Max_ Reg.xlsx_RoiSetAuto-11.zip Distance px		4	11
	con_03m_m67_a3_001_Max_ Reg.xlsx_RoiSetAuto-43.zip Distance px	shi_02m_m67_a3_001_Max_ Reg.xlsx_RoiSetAuto-15.zip Distance px		5	8
	con_03m_m67_a3_001_Max_ Reg.xlsx_RoiSetAuto-44.zip Distance px	shi_02m_m67_a3_001_Max_ Reg.xlsx_RoiSetAuto-17.zip Distance px		17	32
	con_03m_m67_a3_001_Max_ Reg.xlsx_RoiSetAuto-45.zip Distance px	shi_02m_m67_a3_001_Max_ Reg.xlsx_RoiSetAuto-2.zip Distance px		7	9
	con_03m_m67_a3_001_Max_ Reg.xlsx_RoiSetAuto-46.zip Distance px	shi_02m_m67_a3_001_Max_ Reg.xlsx_RoiSetAuto-22.zip Distance px		4	5
	con_03m_m67_a3_001_Max_ Reg.xlsx_RoiSetAuto-47.zip Distance px	shi_02m_m67_a3_001_Max_ Reg.xlsx_RoiSetAuto-24.zip Distance px		13	5
	con_03m_m67_a3_001_Max_ Reg.xlsx_RoiSetAuto-48.zip Distance px	shi_02m_m67_a3_001_Max_ Reg.xlsx_RoiSetAuto-25.zip Distance px		8	11
	con_03m_m67_a3_001_Max_ Reg.xlsx_RoiSetAuto-49.zip Distance px	shi_02m_m67_a3_001_Max_ Reg.xlsx_RoiSetAuto-26.zip Distance px		14	8
	con_03m_m67_a3_001_Max_ Reg.xlsx_RoiSetAuto-50.zip Distance px	shi_02m_m67_a3_001_Max_ Reg.xlsx_RoiSetAuto-28.zip Distance px		6	5
	con_03m_m67_a3_001_Max_ Reg.xlsx_RoiSetAuto-51.zip Distance px	shi_02m_m67_a3_001_Max_ Reg.xlsx_RoiSetAuto-3.zip Distance px		23	176
	con_03m_m67_a3_001_Max_ Reg.xlsx_RoiSetAuto-52.zip Distance px	shi_02m_m67_a3_001_Max_ Reg.xlsx_RoiSetAuto-31.zip Distance px		15	9
	con_03m_m67_a3_001_Max_ Reg.xlsx_RoiSetAuto-53.zip Distance px	shi_02m_m67_a3_001_Max_ Reg.xlsx_RoiSetAuto-33.zip Distance px		21	46
	con_03m_m67_a3_001_Max_ Reg.xlsx_RoiSetAuto-54.zip Distance px	shi_02m_m67_a3_001_Max_ Reg.xlsx_RoiSetAuto-34.zip Distance px		5	5
	con_03m_m67_a3_001_Max_ Reg.xlsx_RoiSetAuto-56.zip Distance px	shi_02m_m67_a3_001_Max_ Reg.xlsx_RoiSetAuto-37.zip Distance px		4	9
	con_03m_m67_a3_001_Max_ Reg.xlsx_RoiSetAuto-57.zip Distance px	shi_02m_m67_a3_001_Max_ Reg.xlsx_RoiSetAuto-38.zip Distance px		7	11
	con_03m_m67_a3_001_Max_ Reg.xlsx_RoiSetAuto-58.zip Distance px	shi_02m_m67_a3_001_Max_ Reg.xlsx_RoiSetAuto-4.zip Distance px		9	44
	con_03m_m67_a3_001_Max_ Reg.xlsx_RoiSetAuto-59.zip Distance px	shi_02m_m67_a3_001_Max_ Reg.xlsx_RoiSetAuto-40.zip Distance px		4	12
	con_03m_m67_a3_001_Max_ Reg.xlsx_RoiSetAuto-6.zip Distance px	shi_02m_m67_a3_001_Max_ Reg.xlsx_RoiSetAuto-41.zip Distance px		25	6
	con_03m_m67_a3_001_Max_ Reg.xlsx_RoiSetAuto-61.zip Distance px	shi_02m_m67_a3_001_Max_ Reg.xlsx_RoiSetAuto-43.zip Distance px		4	14
	con_03m_m67_a3_001_Max_ Reg.xlsx_RoiSetAuto-62.zip Distance px	shi_02m_m67_a3_001_Max_ Reg.xlsx_RoiSetAuto-44.zip Distance px		4	4
	con_03m_m67_a3_001_Max_ Reg.xlsx_RoiSetAuto-63.zip Distance px	shi_02m_m67_a3_001_Max_ Reg.xlsx_RoiSetAuto-45.zip Distance px		20	4
	con_03m_m67_a3_001_Max_ Reg.xlsx_RoiSetAuto-64.zip Distance px	shi_02m_m67_a3_001_Max_ Reg.xlsx_RoiSetAuto-46.zip Distance px		10	18
	con_03m_m67_a3_001_Max_ Reg.xlsx_RoiSetAuto-65.zip Distance px	shi_02m_m67_a3_001_Max_ Reg.xlsx_RoiSetAuto-48.zip Distance px		16	15
	con_03m_m67_a3_001_Max_ Reg.xlsx_RoiSetAuto-66.zip Distance px	shi_02m_m67_a3_001_Max_ Reg.xlsx_RoiSetAuto-49.zip Distance px		6	8
	con_03m_m67_a3_001_Max_ Reg.xlsx_RoiSetAuto-67.zip Distance px	shi_02m_m67_a3_001_Max_ Reg.xlsx_RoiSetAuto-50.zip Distance px		6	8
	con_03m_m67_a3_001_Max_ Reg.xlsx_RoiSetAuto-68.zip Distance px	shi_02m_m67_a3_001_Max_ Reg.xlsx_RoiSetAuto-53.zip Distance px		5	6
	con_03m_m67_a3_001_Max_ Reg.xlsx_RoiSetAuto-69.zip Distance px	shi_02m_m67_a3_001_Max_ Reg.xlsx_RoiSetAuto-54.zip Distance px		6	14
	con_03m_m67_a3_001_Max_ Reg.xlsx_RoiSetAuto-7.zip Distance px	shi_02m_m67_a3_001_Max_ Reg.xlsx_RoiSetAuto-55.zip Distance px		108	11
	con_03m_m67_a3_001_Max_ Reg.xlsx_RoiSetAuto-70.zip Distance px	shi_02m_m67_a3_001_Max_ Reg.xlsx_RoiSetAuto-56.zip Distance px		73	10
	con_03m_m67_a3_001_Max_ Reg.xlsx_RoiSetAuto-71.zip Distance px	shi_02m_m67_a3_001_Max_ Reg.xlsx_RoiSetAuto-6.zip Distance px		7	85
	con_03m_m67_a3_001_Max_ Reg.xlsx_RoiSetAuto-72.zip Distance px	shi_02m_m67_a3_001_Max_ Reg.xlsx_RoiSetAuto-61.zip Distance px		13	18
	con_03m_m67_a3_001_Max_ Reg.xlsx_RoiSetAuto-73.zip Distance px	shi_02m_m67_a3_001_Max_ Reg.xlsx_RoiSetAuto-63.zip Distance px		9	5
	con_03m_m67_a3_001_Max_ Reg.xlsx_RoiSetAuto-74.zip Distance px	shi_02m_m67_a3_001_Max_ Reg.xlsx_RoiSetAuto-64.zip Distance px		4	4
	con_03m_m67_a3_001_Max_ Reg.xlsx_RoiSetAuto-75.zip Distance px	shi_02m_m67_a3_001_Max_ Reg.xlsx_RoiSetAuto-65.zip Distance px		6	8
	con_03m_m67_a3_001_Max_ Reg.xlsx_RoiSetAuto-76.zip Distance px	shi_02m_m67_a3_001_Max_ Reg.xlsx_RoiSetAuto-66.zip Distance px		6	4
	con_03m_m67_a3_001_Max_ Reg.xlsx_RoiSetAuto-77.zip Distance px	shi_02m_m67_a3_001_Max_ Reg.xlsx_RoiSetAuto-7.zip Distance px		8	6
	con_03m_m67_a3_001_Max_ Reg.xlsx_RoiSetAuto-78.zip Distance px	shi_02m_m67_a3_001_Max_ Reg.xlsx_RoiSetAuto-9.zip Distance px		4	95
	con_03m_m67_a3_001_Max_ Reg.xlsx_RoiSetAuto-79.zip Distance px	shi_03m_m67_a3_001_Max_ Reg.xlsx_RoiSetAuto-1.zip Distance px		7	9
	con_03m_m67_a3_001_Max_ Reg.xlsx_RoiSetAuto-8.zip Distance px	shi_03m_m67_a3_001_Max_ Reg.xlsx_RoiSetAuto-10.zip Distance px		5	20
	con_03m_m67_a3_001_Max_ Reg.xlsx_RoiSetAuto-80.zip Distance px	shi_03m_m67_a3_001_Max_ Reg.xlsx_RoiSetAuto-11.zip Distance px		5	4
	con_03m_m67_a3_001_Max_ Reg.xlsx_RoiSetAuto-81.zip Distance px	shi_03m_m67_a3_001_Max_ Reg.xlsx_RoiSetAuto-15.zip Distance px		7	8
	con_03m_m67_a3_001_Max_ Reg.xlsx_RoiSetAuto-82.zip Distance px	shi_03m_m67_a3_001_Max_ Reg.xlsx_RoiSetAuto-16.zip Distance px		10	4
	con_03m_m67_a3_001_Max_ Reg.xlsx_RoiSetAuto-84.zip Distance px	shi_03m_m67_a3_001_Max_ Reg.xlsx_RoiSetAuto-17.zip Distance px		4	19
	con_03m_m67_a3_001_Max_ Reg.xlsx_RoiSetAuto-85.zip Distance px	shi_03m_m67_a3_001_Max_ Reg.xlsx_RoiSetAuto-18.zip Distance px		7	5
	con_03m_m67_a3_001_Max_ Reg.xlsx_RoiSetAuto-86.zip Distance px	shi_03m_m67_a3_001_Max_ Reg.xlsx_RoiSetAuto-20.zip Distance px		4	4
	con_03m_m67_a3_001_Max_ Reg.xlsx_RoiSetAuto-87.zip Distance px	shi_03m_m67_a3_001_Max_ Reg.xlsx_RoiSetAuto-21.zip Distance px		24	12
	con_03m_m67_a3_001_Max_ Reg.xlsx_RoiSetAuto-88.zip Distance px	shi_03m_m67_a3_001_Max_ Reg.xlsx_RoiSetAuto-22.zip Distance px		39	34
	con_03m_m67_a3_001_Max_ Reg.xlsx_RoiSetAuto-89.zip Distance px	shi_03m_m67_a3_001_Max_ Reg.xlsx_RoiSetAuto-23.zip Distance px		10	25
	con_03m_m67_a3_001_Max_ Reg.xlsx_RoiSetAuto-9.zip Distance px	shi_03m_m67_a3_001_Max_ Reg.xlsx_RoiSetAuto-24.zip Distance px		28	12
	con_03m_m67_a3_001_Max_ Reg.xlsx_RoiSetAuto-90.zip Distance px	shi_03m_m67_a3_001_Max_ Reg.xlsx_RoiSetAuto-26.zip Distance px		5	4
	con_03m_m67_a3_001_Max_ Reg.xlsx_RoiSetAuto-91.zip Distance px	shi_03m_m67_a3_001_Max_ Reg.xlsx_RoiSetAuto-29.zip Distance px		10	4
	con_03m_m67_a3_001_Max_ Reg.xlsx_RoiSetAuto-92.zip Distance px	shi_03m_m67_a3_001_Max_ Reg.xlsx_RoiSetAuto-31.zip Distance px		15	5
	con_03m_m67_a3_001_Max_ Reg.xlsx_RoiSetAuto-93.zip Distance px	shi_03m_m67_a3_001_Max_ Reg.xlsx_RoiSetAuto-32.zip Distance px		4	10
	con_03m_m67_a3_001_Max_ Reg.xlsx_RoiSetAuto-94.zip Distance px	shi_03m_m67_a3_001_Max_ Reg.xlsx_RoiSetAuto-33.zip Distance px		7	4
	con_03m_m67_a3_001_Max_ Reg.xlsx_RoiSetAuto-95.zip Distance px	shi_03m_m67_a3_001_Max_ Reg.xlsx_RoiSetAuto-34.zip Distance px		4	4
	con_03m_m67_a3_002_Max_ Reg.xlsx_RoiSetAuto-1.zip Distance px	shi_03m_m67_a3_001_Max_ Reg.xlsx_RoiSetAuto-37.zip Distance px		10	10
	con_03m_m67_a3_002_Max_ Reg.xlsx_RoiSetAuto-10.zip Distance px	shi_03m_m67_a3_001_Max_ Reg.xlsx_RoiSetAuto-38.zip Distance px		9	6
	con_03m_m67_a3_002_Max_ Reg.xlsx_RoiSetAuto-11.zip Distance px	shi_03m_m67_a3_001_Max_ Reg.xlsx_RoiSetAuto-39.zip Distance px		4	4
	con_03m_m67_a3_002_Max_ Reg.xlsx_RoiSetAuto-12.zip Distance px	shi_03m_m67_a3_001_Max_ Reg.xlsx_RoiSetAuto-4.zip Distance px		11	18
	con_03m_m67_a3_002_Max_ Reg.xlsx_RoiSetAuto-13.zip Distance px	shi_03m_m67_a3_001_Max_ Reg.xlsx_RoiSetAuto-41.zip Distance px		21	5
	con_03m_m67_a3_002_Max_ Reg.xlsx_RoiSetAuto-14.zip Distance px	shi_03m_m67_a3_001_Max_ Reg.xlsx_RoiSetAuto-42.zip Distance px		9	6
	con_03m_m67_a3_002_Max_ Reg.xlsx_RoiSetAuto-15.zip Distance px	shi_03m_m67_a3_001_Max_ Reg.xlsx_RoiSetAuto-43.zip Distance px		40	7
	con_03m_m67_a3_002_Max_ Reg.xlsx_RoiSetAuto-16.zip Distance px	shi_03m_m67_a3_001_Max_ Reg.xlsx_RoiSetAuto-46.zip Distance px		6	13
	con_03m_m67_a3_002_Max_ Reg.xlsx_RoiSetAuto-17.zip Distance px	shi_03m_m67_a3_001_Max_ Reg.xlsx_RoiSetAuto-47.zip Distance px		5	5
	con_03m_m67_a3_002_Max_ Reg.xlsx_RoiSetAuto-18.zip Distance px	shi_03m_m67_a3_001_Max_ Reg.xlsx_RoiSetAuto-49.zip Distance px		5	6
	con_03m_m67_a3_002_Max_ Reg.xlsx_RoiSetAuto-19.zip Distance px	shi_03m_m67_a3_001_Max_ Reg.xlsx_RoiSetAuto-52.zip Distance px		4	6
	con_03m_m67_a3_002_Max_ Reg.xlsx_RoiSetAuto-2.zip Distance px	shi_03m_m67_a3_001_Max_ Reg.xlsx_RoiSetAuto-55.zip Distance px		7	7
	con_03m_m67_a3_002_Max_ Reg.xlsx_RoiSetAuto-20.zip Distance px	shi_03m_m67_a3_001_Max_ Reg.xlsx_RoiSetAuto-56.zip Distance px		21	17
	con_03m_m67_a3_002_Max_ Reg.xlsx_RoiSetAuto-21.zip Distance px	shi_03m_m67_a3_001_Max_ Reg.xlsx_RoiSetAuto-57.zip Distance px		20	6
	con_03m_m67_a3_002_Max_ Reg.xlsx_RoiSetAuto-22.zip Distance px	shi_03m_m67_a3_001_Max_ Reg.xlsx_RoiSetAuto-58.zip Distance px		55	4
	con_03m_m67_a3_002_Max_ Reg.xlsx_RoiSetAuto-23.zip Distance px	shi_03m_m67_a3_001_Max_ Reg.xlsx_RoiSetAuto-59.zip Distance px		4	26
	con_03m_m67_a3_002_Max_ Reg.xlsx_RoiSetAuto-24.zip Distance px	shi_03m_m67_a3_001_Max_ Reg.xlsx_RoiSetAuto-6.zip Distance px		15	25
	con_03m_m67_a3_002_Max_ Reg.xlsx_RoiSetAuto-25.zip Distance px	shi_03m_m67_a3_001_Max_ Reg.xlsx_RoiSetAuto-60.zip Distance px		14	13
	con_03m_m67_a3_002_Max_ Reg.xlsx_RoiSetAuto-26.zip Distance px	shi_03m_m67_a3_001_Max_ Reg.xlsx_RoiSetAuto-61.zip Distance px		4	5
	con_03m_m67_a3_002_Max_ Reg.xlsx_RoiSetAuto-27.zip Distance px	shi_03m_m67_a3_001_Max_ Reg.xlsx_RoiSetAuto-7.zip Distance px		4	6
	con_03m_m67_a3_002_Max_ Reg.xlsx_RoiSetAuto-28.zip Distance px	shi_03m_m67_a3_001_Max_ Reg.xlsx_RoiSetAuto-8.zip Distance px		5	23
	con_03m_m67_a3_002_Max_ Reg.xlsx_RoiSetAuto-29.zip Distance px	shi_03m_m67_a3_002_Max_ Reg.xlsx_RoiSetAuto-1.zip Distance px		10	4
	con_03m_m67_a3_002_Max_ Reg.xlsx_RoiSetAuto-30.zip Distance px	shi_03m_m67_a3_002_Max_ Reg.xlsx_RoiSetAuto-10.zip Distance px		26	28
	con_03m_m67_a3_002_Max_ Reg.xlsx_RoiSetAuto-31.zip Distance px	shi_03m_m67_a3_002_Max_ Reg.xlsx_RoiSetAuto-11.zip Distance px		6	4
	con_03m_m67_a3_002_Max_ Reg.xlsx_RoiSetAuto-32.zip Distance px	shi_03m_m67_a3_002_Max_ Reg.xlsx_RoiSetAuto-12.zip Distance px		21	4
	con_03m_m67_a3_002_Max_ Reg.xlsx_RoiSetAuto-33.zip Distance px	shi_03m_m67_a3_002_Max_ Reg.xlsx_RoiSetAuto-13.zip Distance px		16	13
	con_03m_m67_a3_002_Max_ Reg.xlsx_RoiSetAuto-34.zip Distance px	shi_03m_m67_a3_002_Max_ Reg.xlsx_RoiSetAuto-14.zip Distance px		4	4
	con_03m_m67_a3_002_Max_ Reg.xlsx_RoiSetAuto-35.zip Distance px	shi_03m_m67_a3_002_Max_ Reg.xlsx_RoiSetAuto-15.zip Distance px		17	11
	con_03m_m67_a3_002_Max_ Reg.xlsx_RoiSetAuto-36.zip Distance px	shi_03m_m67_a3_002_Max_ Reg.xlsx_RoiSetAuto-16.zip Distance px		4	7
	con_03m_m67_a3_002_Max_ Reg.xlsx_RoiSetAuto-37.zip Distance px	shi_03m_m67_a3_002_Max_ Reg.xlsx_RoiSetAuto-17.zip Distance px		7	4
	con_03m_m67_a3_002_Max_ Reg.xlsx_RoiSetAuto-38.zip Distance px	shi_03m_m67_a3_002_Max_ Reg.xlsx_RoiSetAuto-18.zip Distance px		5	10
	con_03m_m67_a3_002_Max_ Reg.xlsx_RoiSetAuto-39.zip Distance px	shi_03m_m67_a3_002_Max_ Reg.xlsx_RoiSetAuto-19.zip Distance px		5	7
	con_03m_m67_a3_002_Max_ Reg.xlsx_RoiSetAuto-4.zip Distance px	shi_03m_m67_a3_002_Max_ Reg.xlsx_RoiSetAuto-2.zip Distance px		43	51
	con_03m_m67_a3_002_Max_ Reg.xlsx_RoiSetAuto-40.zip Distance px	shi_03m_m67_a3_002_Max_ Reg.xlsx_RoiSetAuto-20.zip Distance px		28	5
	con_03m_m67_a3_002_Max_ Reg.xlsx_RoiSetAuto-41.zip Distance px	shi_03m_m67_a3_002_Max_ Reg.xlsx_RoiSetAuto-21.zip Distance px		7	4
	con_03m_m67_a3_002_Max_ Reg.xlsx_RoiSetAuto-42.zip Distance px	shi_03m_m67_a3_002_Max_ Reg.xlsx_RoiSetAuto-22.zip Distance px		5	5
	con_03m_m67_a3_002_Max_ Reg.xlsx_RoiSetAuto-44.zip Distance px	shi_03m_m67_a3_002_Max_ Reg.xlsx_RoiSetAuto-23.zip Distance px		9	4
	con_03m_m67_a3_002_Max_ Reg.xlsx_RoiSetAuto-45.zip Distance px	shi_03m_m67_a3_002_Max_ Reg.xlsx_RoiSetAuto-24.zip Distance px		8	4
	con_03m_m67_a3_002_Max_ Reg.xlsx_RoiSetAuto-46.zip Distance px	shi_03m_m67_a3_002_Max_ Reg.xlsx_RoiSetAuto-25.zip Distance px		7	14
	con_03m_m67_a3_002_Max_ Reg.xlsx_RoiSetAuto-47.zip Distance px	shi_03m_m67_a3_002_Max_ Reg.xlsx_RoiSetAuto-26.zip Distance px		4	4
	con_03m_m67_a3_002_Max_ Reg.xlsx_RoiSetAuto-48.zip Distance px	shi_03m_m67_a3_002_Max_ Reg.xlsx_RoiSetAuto-27.zip Distance px		7	4
	con_03m_m67_a3_002_Max_ Reg.xlsx_RoiSetAuto-5.zip Distance px	shi_03m_m67_a3_002_Max_ Reg.xlsx_RoiSetAuto-28.zip Distance px		210	4
	con_03m_m67_a3_002_Max_ Reg.xlsx_RoiSetAuto-6.zip Distance px	shi_03m_m67_a3_002_Max_ Reg.xlsx_RoiSetAuto-29.zip Distance px		4	21
	con_03m_m67_a3_002_Max_ Reg.xlsx_RoiSetAuto-7.zip Distance px	shi_03m_m67_a3_002_Max_ Reg.xlsx_RoiSetAuto-3.zip Distance px		53	20
	con_03m_m67_a3_002_Max_ Reg.xlsx_RoiSetAuto-8.zip Distance px	shi_03m_m67_a3_002_Max_ Reg.xlsx_RoiSetAuto-30.zip Distance px		22	17
	con_03m_m67_a3_002_Max_ Reg.xlsx_RoiSetAuto-9.zip Distance px	shi_03m_m67_a3_002_Max_ Reg.xlsx_RoiSetAuto-31.zip Distance px		4	5
	con_03m_m67_a3_003_Max_ Reg.xlsx_RoiSetAuto-1.zip Distance px	shi_03m_m67_a3_002_Max_ Reg.xlsx_RoiSetAuto-32.zip Distance px		7	5
	con_03m_m67_a3_003_Max_ Reg.xlsx_RoiSetAuto-11.zip Distance px	shi_03m_m67_a3_002_Max_ Reg.xlsx_RoiSetAuto-33.zip Distance px		11	8
	con_03m_m67_a3_003_Max_ Reg.xlsx_RoiSetAuto-12.zip Distance px	shi_03m_m67_a3_002_Max_ Reg.xlsx_RoiSetAuto-34.zip Distance px		14	7
	con_03m_m67_a3_003_Max_ Reg.xlsx_RoiSetAuto-13.zip Distance px	shi_03m_m67_a3_002_Max_ Reg.xlsx_RoiSetAuto-35.zip Distance px		15	12
	con_03m_m67_a3_003_Max_ Reg.xlsx_RoiSetAuto-14.zip Distance px	shi_03m_m67_a3_002_Max_ Reg.xlsx_RoiSetAuto-36.zip Distance px		4	4
	con_03m_m67_a3_003_Max_ Reg.xlsx_RoiSetAuto-15.zip Distance px	shi_03m_m67_a3_002_Max_ Reg.xlsx_RoiSetAuto-37.zip Distance px		5	12
	con_03m_m67_a3_003_Max_ Reg.xlsx_RoiSetAuto-17.zip Distance px	shi_03m_m67_a3_002_Max_ Reg.xlsx_RoiSetAuto-38.zip Distance px		8	5
	con_03m_m67_a3_003_Max_ Reg.xlsx_RoiSetAuto-18.zip Distance px	shi_03m_m67_a3_002_Max_ Reg.xlsx_RoiSetAuto-39.zip Distance px		22	4
	con_03m_m67_a3_003_Max_ Reg.xlsx_RoiSetAuto-2.zip Distance px	shi_03m_m67_a3_002_Max_ Reg.xlsx_RoiSetAuto-4.zip Distance px		9	10
	con_03m_m67_a3_003_Max_ Reg.xlsx_RoiSetAuto-20.zip Distance px	shi_03m_m67_a3_002_Max_ Reg.xlsx_RoiSetAuto-40.zip Distance px		7	4
	con_03m_m67_a3_003_Max_ Reg.xlsx_RoiSetAuto-3.zip Distance px	shi_03m_m67_a3_002_Max_ Reg.xlsx_RoiSetAuto-41.zip Distance px		30	5
	con_03m_m67_a3_003_Max_ Reg.xlsx_RoiSetAuto-5.zip Distance px	shi_03m_m67_a3_002_Max_ Reg.xlsx_RoiSetAuto-42.zip Distance px		7	48
	con_03m_m67_a3_003_Max_ Reg.xlsx_RoiSetAuto-6.zip Distance px	shi_03m_m67_a3_002_Max_ Reg.xlsx_RoiSetAuto-43.zip Distance px		5	5
	con_03m_m67_a3_003_Max_ Reg.xlsx_RoiSetAuto-7.zip Distance px	shi_03m_m67_a3_002_Max_ Reg.xlsx_RoiSetAuto-44.zip Distance px		5	25
	con_03m_m67_a3_003_Max_ Reg.xlsx_RoiSetAuto-9.zip Distance px	shi_03m_m67_a3_002_Max_ Reg.xlsx_RoiSetAuto-45.zip Distance px		18	9
	con_04m_m67_a3_002_Max_ Reg.xlsx_RoiSetAuto-1.zip Distance px	shi_03m_m67_a3_002_Max_ Reg.xlsx_RoiSetAuto-46.zip Distance px		64	5
	con_04m_m67_a3_002_Max_ Reg.xlsx_RoiSetAuto-10.zip Distance px	shi_03m_m67_a3_002_Max_ Reg.xlsx_RoiSetAuto-47.zip Distance px		15	22
	con_04m_m67_a3_002_Max_ Reg.xlsx_RoiSetAuto-11.zip Distance px	shi_03m_m67_a3_002_Max_ Reg.xlsx_RoiSetAuto-48.zip Distance px		5	4
	con_04m_m67_a3_002_Max_ Reg.xlsx_RoiSetAuto-12.zip Distance px	shi_03m_m67_a3_002_Max_ Reg.xlsx_RoiSetAuto-5.zip Distance px		4	8
	con_04m_m67_a3_002_Max_ Reg.xlsx_RoiSetAuto-13.zip Distance px	shi_03m_m67_a3_002_Max_ Reg.xlsx_RoiSetAuto-50.zip Distance px		4	5
	con_04m_m67_a3_002_Max_ Reg.xlsx_RoiSetAuto-14.zip Distance px	shi_03m_m67_a3_002_Max_ Reg.xlsx_RoiSetAuto-51.zip Distance px		7	5
	con_04m_m67_a3_002_Max_ Reg.xlsx_RoiSetAuto-15.zip Distance px	shi_03m_m67_a3_002_Max_ Reg.xlsx_RoiSetAuto-52.zip Distance px		4	4
	con_04m_m67_a3_002_Max_ Reg.xlsx_RoiSetAuto-16.zip Distance px	shi_03m_m67_a3_002_Max_ Reg.xlsx_RoiSetAuto-53.zip Distance px		8	20
	con_04m_m67_a3_002_Max_ Reg.xlsx_RoiSetAuto-17.zip Distance px	shi_03m_m67_a3_002_Max_ Reg.xlsx_RoiSetAuto-54.zip Distance px		8	8
	con_04m_m67_a3_002_Max_ Reg.xlsx_RoiSetAuto-18.zip Distance px	shi_03m_m67_a3_002_Max_ Reg.xlsx_RoiSetAuto-55.zip Distance px		10	4
	con_04m_m67_a3_002_Max_ Reg.xlsx_RoiSetAuto-19.zip Distance px	shi_03m_m67_a3_002_Max_ Reg.xlsx_RoiSetAuto-56.zip Distance px		43	5
	con_04m_m67_a3_002_Max_ Reg.xlsx_RoiSetAuto-2.zip Distance px	shi_03m_m67_a3_002_Max_ Reg.xlsx_RoiSetAuto-58.zip Distance px		20	11
	con_04m_m67_a3_002_Max_ Reg.xlsx_RoiSetAuto-20.zip Distance px	shi_03m_m67_a3_002_Max_ Reg.xlsx_RoiSetAuto-6.zip Distance px		5	11
	con_04m_m67_a3_002_Max_ Reg.xlsx_RoiSetAuto-21.zip Distance px	shi_03m_m67_a3_002_Max_ Reg.xlsx_RoiSetAuto-7.zip Distance px		4	7
	con_04m_m67_a3_002_Max_ Reg.xlsx_RoiSetAuto-22.zip Distance px	shi_03m_m67_a3_002_Max_ Reg.xlsx_RoiSetAuto-8.zip Distance px		13	34
	con_04m_m67_a3_002_Max_ Reg.xlsx_RoiSetAuto-23.zip Distance px	shi_03m_m67_a3_002_Max_ Reg.xlsx_RoiSetAuto-9.zip Distance px		20	4
	con_04m_m67_a3_002_Max_ Reg.xlsx_RoiSetAuto-24.zip Distance px	shi_03m_m67_a3_003_Max_ Reg.xlsx_RoiSetAuto-1.zip Distance px		4	8
	con_04m_m67_a3_002_Max_ Reg.xlsx_RoiSetAuto-25.zip Distance px	shi_03m_m67_a3_003_Max_ Reg.xlsx_RoiSetAuto-10.zip Distance px		37	34
	con_04m_m67_a3_002_Max_ Reg.xlsx_RoiSetAuto-26.zip Distance px	shi_03m_m67_a3_003_Max_ Reg.xlsx_RoiSetAuto-11.zip Distance px		7	4
	con_04m_m67_a3_002_Max_ Reg.xlsx_RoiSetAuto-27.zip Distance px	shi_03m_m67_a3_003_Max_ Reg.xlsx_RoiSetAuto-12.zip Distance px		4	4
	con_04m_m67_a3_002_Max_ Reg.xlsx_RoiSetAuto-28.zip Distance px	shi_03m_m67_a3_003_Max_ Reg.xlsx_RoiSetAuto-13.zip Distance px		8	6
	con_04m_m67_a3_002_Max_ Reg.xlsx_RoiSetAuto-29.zip Distance px	shi_03m_m67_a3_003_Max_ Reg.xlsx_RoiSetAuto-14.zip Distance px		41	4
	con_04m_m67_a3_002_Max_ Reg.xlsx_RoiSetAuto-3.zip Distance px	shi_03m_m67_a3_003_Max_ Reg.xlsx_RoiSetAuto-15.zip Distance px		34	4
	con_04m_m67_a3_002_Max_ Reg.xlsx_RoiSetAuto-30.zip Distance px	shi_03m_m67_a3_003_Max_ Reg.xlsx_RoiSetAuto-17.zip Distance px		5	9
	con_04m_m67_a3_002_Max_ Reg.xlsx_RoiSetAuto-32.zip Distance px	shi_03m_m67_a3_003_Max_ Reg.xlsx_RoiSetAuto-18.zip Distance px		5	4
	con_04m_m67_a3_002_Max_ Reg.xlsx_RoiSetAuto-34.zip Distance px	shi_03m_m67_a3_003_Max_ Reg.xlsx_RoiSetAuto-19.zip Distance px		4	6
	con_04m_m67_a3_002_Max_ Reg.xlsx_RoiSetAuto-35.zip Distance px	shi_03m_m67_a3_003_Max_ Reg.xlsx_RoiSetAuto-2.zip Distance px		6	195
	con_04m_m67_a3_002_Max_ Reg.xlsx_RoiSetAuto-36.zip Distance px	shi_03m_m67_a3_003_Max_ Reg.xlsx_RoiSetAuto-20.zip Distance px		10	23
	con_04m_m67_a3_002_Max_ Reg.xlsx_RoiSetAuto-37.zip Distance px	shi_03m_m67_a3_003_Max_ Reg.xlsx_RoiSetAuto-21.zip Distance px		4	10
	con_04m_m67_a3_002_Max_ Reg.xlsx_RoiSetAuto-38.zip Distance px	shi_03m_m67_a3_003_Max_ Reg.xlsx_RoiSetAuto-22.zip Distance px		5	5
	con_04m_m67_a3_002_Max_ Reg.xlsx_RoiSetAuto-44.zip Distance px	shi_03m_m67_a3_003_Max_ Reg.xlsx_RoiSetAuto-23.zip Distance px		8	4
	con_04m_m67_a3_002_Max_ Reg.xlsx_RoiSetAuto-45.zip Distance px	shi_03m_m67_a3_003_Max_ Reg.xlsx_RoiSetAuto-25.zip Distance px		25	19
	con_04m_m67_a3_002_Max_ Reg.xlsx_RoiSetAuto-46.zip Distance px	shi_03m_m67_a3_003_Max_ Reg.xlsx_RoiSetAuto-26.zip Distance px		8	13
	con_04m_m67_a3_002_Max_ Reg.xlsx_RoiSetAuto-47.zip Distance px	shi_03m_m67_a3_003_Max_ Reg.xlsx_RoiSetAuto-3.zip Distance px		59	4
	con_04m_m67_a3_002_Max_ Reg.xlsx_RoiSetAuto-48.zip Distance px	shi_03m_m67_a3_003_Max_ Reg.xlsx_RoiSetAuto-6.zip Distance px		6	7
	con_04m_m67_a3_002_Max_ Reg.xlsx_RoiSetAuto-49.zip Distance px	shi_03m_m67_a3_003_Max_ Reg.xlsx_RoiSetAuto-7.zip Distance px		4	5
	con_04m_m67_a3_002_Max_ Reg.xlsx_RoiSetAuto-5.zip Distance px	shi_03m_m67_a3_003_Max_ Reg.xlsx_RoiSetAuto-8.zip Distance px		4	80
	con_04m_m67_a3_002_Max_ Reg.xlsx_RoiSetAuto-50.zip Distance px	shi_03m_m67_a3_003_Max_ Reg.xlsx_RoiSetAuto-9.zip Distance px		16	4
	con_04m_m67_a3_002_Max_ Reg.xlsx_RoiSetAuto-51.zip Distance px	shi_04m_m67_a3_001_Max_ Reg.xlsx_RoiSetAuto-1.zip Distance px		13	4
	con_04m_m67_a3_002_Max_ Reg.xlsx_RoiSetAuto-52.zip Distance px	shi_04m_m67_a3_001_Max_ Reg.xlsx_RoiSetAuto-11.zip Distance px		10	4
	con_04m_m67_a3_002_Max_ Reg.xlsx_RoiSetAuto-53.zip Distance px	shi_04m_m67_a3_001_Max_ Reg.xlsx_RoiSetAuto-12.zip Distance px		5	25
	con_04m_m67_a3_002_Max_ Reg.xlsx_RoiSetAuto-54.zip Distance px	shi_04m_m67_a3_001_Max_ Reg.xlsx_RoiSetAuto-13.zip Distance px		8	6
	con_04m_m67_a3_002_Max_ Reg.xlsx_RoiSetAuto-55.zip Distance px	shi_04m_m67_a3_001_Max_ Reg.xlsx_RoiSetAuto-14.zip Distance px		7	5
	con_04m_m67_a3_002_Max_ Reg.xlsx_RoiSetAuto-56.zip Distance px	shi_04m_m67_a3_001_Max_ Reg.xlsx_RoiSetAuto-15.zip Distance px		5	4
	con_04m_m67_a3_002_Max_ Reg.xlsx_RoiSetAuto-57.zip Distance px	shi_04m_m67_a3_001_Max_ Reg.xlsx_RoiSetAuto-16.zip Distance px		5	21
	con_04m_m67_a3_002_Max_ Reg.xlsx_RoiSetAuto-58.zip Distance px	shi_04m_m67_a3_001_Max_ Reg.xlsx_RoiSetAuto-17.zip Distance px		4	4
	con_04m_m67_a3_002_Max_ Reg.xlsx_RoiSetAuto-59.zip Distance px	shi_04m_m67_a3_001_Max_ Reg.xlsx_RoiSetAuto-19.zip Distance px		6	4
	con_04m_m67_a3_002_Max_ Reg.xlsx_RoiSetAuto-60.zip Distance px	shi_04m_m67_a3_001_Max_ Reg.xlsx_RoiSetAuto-2.zip Distance px		4	7
	con_04m_m67_a3_002_Max_ Reg.xlsx_RoiSetAuto-61.zip Distance px	shi_04m_m67_a3_001_Max_ Reg.xlsx_RoiSetAuto-20.zip Distance px		4	15
	con_04m_m67_a3_002_Max_ Reg.xlsx_RoiSetAuto-62.zip Distance px	shi_04m_m67_a3_001_Max_ Reg.xlsx_RoiSetAuto-21.zip Distance px		6	4
	con_04m_m67_a3_002_Max_ Reg.xlsx_RoiSetAuto-63.zip Distance px	shi_04m_m67_a3_001_Max_ Reg.xlsx_RoiSetAuto-22.zip Distance px		34	11
	con_04m_m67_a3_002_Max_ Reg.xlsx_RoiSetAuto-64.zip Distance px	shi_04m_m67_a3_001_Max_ Reg.xlsx_RoiSetAuto-23.zip Distance px		5	6
	con_04m_m67_a3_002_Max_ Reg.xlsx_RoiSetAuto-65.zip Distance px	shi_04m_m67_a3_001_Max_ Reg.xlsx_RoiSetAuto-24.zip Distance px		5	4
	con_04m_m67_a3_002_Max_ Reg.xlsx_RoiSetAuto-7.zip Distance px	shi_04m_m67_a3_001_Max_ Reg.xlsx_RoiSetAuto-25.zip Distance px		27	4
	con_04m_m67_a3_002_Max_ Reg.xlsx_RoiSetAuto-8.zip Distance px	shi_04m_m67_a3_001_Max_ Reg.xlsx_RoiSetAuto-26.zip Distance px		13	12
	con_04m_m67_a3_003_Max_ Reg.xlsx_RoiSetAuto-1.zip Distance px	shi_04m_m67_a3_001_Max_ Reg.xlsx_RoiSetAuto-27.zip Distance px		22	4
	con_04m_m67_a3_003_Max_ Reg.xlsx_RoiSetAuto-10.zip Distance px	shi_04m_m67_a3_001_Max_ Reg.xlsx_RoiSetAuto-28.zip Distance px		54	7
	con_04m_m67_a3_003_Max_ Reg.xlsx_RoiSetAuto-11.zip Distance px	shi_04m_m67_a3_001_Max_ Reg.xlsx_RoiSetAuto-29.zip Distance px		4	4
	con_04m_m67_a3_003_Max_ Reg.xlsx_RoiSetAuto-12.zip Distance px	shi_04m_m67_a3_001_Max_ Reg.xlsx_RoiSetAuto-3.zip Distance px		12	69
	con_04m_m67_a3_003_Max_ Reg.xlsx_RoiSetAuto-14.zip Distance px	shi_04m_m67_a3_001_Max_ Reg.xlsx_RoiSetAuto-30.zip Distance px		22	21
	con_04m_m67_a3_003_Max_ Reg.xlsx_RoiSetAuto-15.zip Distance px	shi_04m_m67_a3_001_Max_ Reg.xlsx_RoiSetAuto-31.zip Distance px		4	5
	con_04m_m67_a3_003_Max_ Reg.xlsx_RoiSetAuto-16.zip Distance px	shi_04m_m67_a3_001_Max_ Reg.xlsx_RoiSetAuto-32.zip Distance px		4	8
	con_04m_m67_a3_003_Max_ Reg.xlsx_RoiSetAuto-17.zip Distance px	shi_04m_m67_a3_001_Max_ Reg.xlsx_RoiSetAuto-33.zip Distance px		4	23
	con_04m_m67_a3_003_Max_ Reg.xlsx_RoiSetAuto-18.zip Distance px	shi_04m_m67_a3_001_Max_ Reg.xlsx_RoiSetAuto-34.zip Distance px		5	6
	con_04m_m67_a3_003_Max_ Reg.xlsx_RoiSetAuto-19.zip Distance px	shi_04m_m67_a3_001_Max_ Reg.xlsx_RoiSetAuto-35.zip Distance px		8	6
	con_04m_m67_a3_003_Max_ Reg.xlsx_RoiSetAuto-2.zip Distance px	shi_04m_m67_a3_001_Max_ Reg.xlsx_RoiSetAuto-38.zip Distance px		11	7
	con_04m_m67_a3_003_Max_ Reg.xlsx_RoiSetAuto-21.zip Distance px	shi_04m_m67_a3_001_Max_ Reg.xlsx_RoiSetAuto-39.zip Distance px		4	8
	con_04m_m67_a3_003_Max_ Reg.xlsx_RoiSetAuto-22.zip Distance px	shi_04m_m67_a3_001_Max_ Reg.xlsx_RoiSetAuto-4.zip Distance px		4	14
	con_04m_m67_a3_003_Max_ Reg.xlsx_RoiSetAuto-23.zip Distance px	shi_04m_m67_a3_001_Max_ Reg.xlsx_RoiSetAuto-40.zip Distance px		31	5
	con_04m_m67_a3_003_Max_ Reg.xlsx_RoiSetAuto-24.zip Distance px	shi_04m_m67_a3_001_Max_ Reg.xlsx_RoiSetAuto-41.zip Distance px		6	4
	con_04m_m67_a3_003_Max_ Reg.xlsx_RoiSetAuto-25.zip Distance px	shi_04m_m67_a3_001_Max_ Reg.xlsx_RoiSetAuto-42.zip Distance px		4	29
	con_04m_m67_a3_003_Max_ Reg.xlsx_RoiSetAuto-26.zip Distance px	shi_04m_m67_a3_001_Max_ Reg.xlsx_RoiSetAuto-43.zip Distance px		4	17
	con_04m_m67_a3_003_Max_ Reg.xlsx_RoiSetAuto-27.zip Distance px	shi_04m_m67_a3_001_Max_ Reg.xlsx_RoiSetAuto-44.zip Distance px		8	35
	con_04m_m67_a3_003_Max_ Reg.xlsx_RoiSetAuto-28.zip Distance px	shi_04m_m67_a3_001_Max_ Reg.xlsx_RoiSetAuto-45.zip Distance px		4	4
	con_04m_m67_a3_003_Max_ Reg.xlsx_RoiSetAuto-29.zip Distance px	shi_04m_m67_a3_001_Max_ Reg.xlsx_RoiSetAuto-47.zip Distance px		6	8
	con_04m_m67_a3_003_Max_ Reg.xlsx_RoiSetAuto-30.zip Distance px	shi_04m_m67_a3_001_Max_ Reg.xlsx_RoiSetAuto-48.zip Distance px		4	4
	con_04m_m67_a3_003_Max_ Reg.xlsx_RoiSetAuto-31.zip Distance px	shi_04m_m67_a3_001_Max_ Reg.xlsx_RoiSetAuto-49.zip Distance px		4	4
	con_04m_m67_a3_003_Max_ Reg.xlsx_RoiSetAuto-4.zip Distance px	shi_04m_m67_a3_001_Max_ Reg.xlsx_RoiSetAuto-5.zip Distance px		51	33
	con_04m_m67_a3_003_Max_ Reg.xlsx_RoiSetAuto-7.zip Distance px	shi_04m_m67_a3_001_Max_ Reg.xlsx_RoiSetAuto-50.zip Distance px		7	4
	con_04m_m67_a3_003_Max_ Reg.xlsx_RoiSetAuto-8.zip Distance px	shi_04m_m67_a3_001_Max_ Reg.xlsx_RoiSetAuto-51.zip Distance px		13	5
	con_04m_m67_a3_003_Max_ Reg.xlsx_RoiSetAuto-9.zip Distance px	shi_04m_m67_a3_001_Max_ Reg.xlsx_RoiSetAuto-52.zip Distance px		14	6
	con_05m_m67_a3_001_Max_ Reg.xlsx_RoiSetAuto-1.zip Distance px	shi_04m_m67_a3_001_Max_ Reg.xlsx_RoiSetAuto-53.zip Distance px		4	5
	con_05m_m67_a3_001_Max_ Reg.xlsx_RoiSetAuto-10.zip Distance px	shi_04m_m67_a3_001_Max_ Reg.xlsx_RoiSetAuto-54.zip Distance px		23	12
	con_05m_m67_a3_001_Max_ Reg.xlsx_RoiSetAuto-11.zip Distance px	shi_04m_m67_a3_001_Max_ Reg.xlsx_RoiSetAuto-55.zip Distance px		12	4
	con_05m_m67_a3_001_Max_ Reg.xlsx_RoiSetAuto-12.zip Distance px	shi_04m_m67_a3_001_Max_ Reg.xlsx_RoiSetAuto-56.zip Distance px		4	8
	con_05m_m67_a3_001_Max_ Reg.xlsx_RoiSetAuto-13.zip Distance px	shi_04m_m67_a3_001_Max_ Reg.xlsx_RoiSetAuto-57.zip Distance px		6	5
	con_05m_m67_a3_001_Max_ Reg.xlsx_RoiSetAuto-14.zip Distance px	shi_04m_m67_a3_001_Max_ Reg.xlsx_RoiSetAuto-58.zip Distance px		87	30
	con_05m_m67_a3_001_Max_ Reg.xlsx_RoiSetAuto-15.zip Distance px	shi_04m_m67_a3_001_Max_ Reg.xlsx_RoiSetAuto-59.zip Distance px		12	4
	con_05m_m67_a3_001_Max_ Reg.xlsx_RoiSetAuto-16.zip Distance px	shi_04m_m67_a3_001_Max_ Reg.xlsx_RoiSetAuto-6.zip Distance px		9	5
	con_05m_m67_a3_001_Max_ Reg.xlsx_RoiSetAuto-17.zip Distance px	shi_04m_m67_a3_001_Max_ Reg.xlsx_RoiSetAuto-60.zip Distance px		4	14
	con_05m_m67_a3_001_Max_ Reg.xlsx_RoiSetAuto-18.zip Distance px	shi_04m_m67_a3_001_Max_ Reg.xlsx_RoiSetAuto-61.zip Distance px		20	8
	con_05m_m67_a3_001_Max_ Reg.xlsx_RoiSetAuto-19.zip Distance px	shi_04m_m67_a3_001_Max_ Reg.xlsx_RoiSetAuto-62.zip Distance px		5	4
	con_05m_m67_a3_001_Max_ Reg.xlsx_RoiSetAuto-2.zip Distance px	shi_04m_m67_a3_001_Max_ Reg.xlsx_RoiSetAuto-63.zip Distance px		23	13
	con_05m_m67_a3_001_Max_ Reg.xlsx_RoiSetAuto-20.zip Distance px	shi_04m_m67_a3_001_Max_ Reg.xlsx_RoiSetAuto-64.zip Distance px		9	5
	con_05m_m67_a3_001_Max_ Reg.xlsx_RoiSetAuto-21.zip Distance px	shi_04m_m67_a3_001_Max_ Reg.xlsx_RoiSetAuto-65.zip Distance px		37	10
	con_05m_m67_a3_001_Max_ Reg.xlsx_RoiSetAuto-22.zip Distance px	shi_04m_m67_a3_001_Max_ Reg.xlsx_RoiSetAuto-66.zip Distance px		4	4
	con_05m_m67_a3_001_Max_ Reg.xlsx_RoiSetAuto-23.zip Distance px	shi_04m_m67_a3_001_Max_ Reg.xlsx_RoiSetAuto-68.zip Distance px		6	6
	con_05m_m67_a3_001_Max_ Reg.xlsx_RoiSetAuto-25.zip Distance px	shi_04m_m67_a3_001_Max_ Reg.xlsx_RoiSetAuto-69.zip Distance px		13	36
	con_05m_m67_a3_001_Max_ Reg.xlsx_RoiSetAuto-26.zip Distance px	shi_04m_m67_a3_001_Max_ Reg.xlsx_RoiSetAuto-7.zip Distance px		10	17
	con_05m_m67_a3_001_Max_ Reg.xlsx_RoiSetAuto-28.zip Distance px	shi_04m_m67_a3_001_Max_ Reg.xlsx_RoiSetAuto-70.zip Distance px		4	6
	con_05m_m67_a3_001_Max_ Reg.xlsx_RoiSetAuto-29.zip Distance px	shi_04m_m67_a3_001_Max_ Reg.xlsx_RoiSetAuto-71.zip Distance px		6	6
	con_05m_m67_a3_001_Max_ Reg.xlsx_RoiSetAuto-3.zip Distance px	shi_04m_m67_a3_001_Max_ Reg.xlsx_RoiSetAuto-72.zip Distance px		15	7
	con_05m_m67_a3_001_Max_ Reg.xlsx_RoiSetAuto-30.zip Distance px	shi_04m_m67_a3_001_Max_ Reg.xlsx_RoiSetAuto-73.zip Distance px		10	4
	con_05m_m67_a3_001_Max_ Reg.xlsx_RoiSetAuto-31.zip Distance px	shi_04m_m67_a3_001_Max_ Reg.xlsx_RoiSetAuto-74.zip Distance px		10	4
	con_05m_m67_a3_001_Max_ Reg.xlsx_RoiSetAuto-32.zip Distance px	shi_04m_m67_a3_001_Max_ Reg.xlsx_RoiSetAuto-75.zip Distance px		8	6
	con_05m_m67_a3_001_Max_ Reg.xlsx_RoiSetAuto-33.zip Distance px	shi_04m_m67_a3_001_Max_ Reg.xlsx_RoiSetAuto-76.zip Distance px		9	4
	con_05m_m67_a3_001_Max_ Reg.xlsx_RoiSetAuto-36.zip Distance px	shi_04m_m67_a3_001_Max_ Reg.xlsx_RoiSetAuto-77.zip Distance px		21	4
	con_05m_m67_a3_001_Max_ Reg.xlsx_RoiSetAuto-37.zip Distance px	shi_04m_m67_a3_001_Max_ Reg.xlsx_RoiSetAuto-78.zip Distance px		4	6
	con_05m_m67_a3_001_Max_ Reg.xlsx_RoiSetAuto-38.zip Distance px	shi_04m_m67_a3_001_Max_ Reg.xlsx_RoiSetAuto-79.zip Distance px		4	4
	con_05m_m67_a3_001_Max_ Reg.xlsx_RoiSetAuto-39.zip Distance px	shi_04m_m67_a3_001_Max_ Reg.xlsx_RoiSetAuto-8.zip Distance px		8	4
	con_05m_m67_a3_001_Max_ Reg.xlsx_RoiSetAuto-4.zip Distance px	shi_04m_m67_a3_001_Max_ Reg.xlsx_RoiSetAuto-80.zip Distance px		5	15
	con_05m_m67_a3_001_Max_ Reg.xlsx_RoiSetAuto-40.zip Distance px	shi_04m_m67_a3_001_Max_ Reg.xlsx_RoiSetAuto-81.zip Distance px		8	4
	con_05m_m67_a3_001_Max_ Reg.xlsx_RoiSetAuto-41.zip Distance px	shi_04m_m67_a3_001_Max_ Reg.xlsx_RoiSetAuto-82.zip Distance px		10	4
	con_05m_m67_a3_001_Max_ Reg.xlsx_RoiSetAuto-42.zip Distance px	shi_04m_m67_a3_001_Max_ Reg.xlsx_RoiSetAuto-83.zip Distance px		6	12
	con_05m_m67_a3_001_Max_ Reg.xlsx_RoiSetAuto-43.zip Distance px	shi_04m_m67_a3_001_Max_ Reg.xlsx_RoiSetAuto-84.zip Distance px		4	4
	con_05m_m67_a3_001_Max_ Reg.xlsx_RoiSetAuto-44.zip Distance px	shi_04m_m67_a3_001_Max_ Reg.xlsx_RoiSetAuto-85.zip Distance px		4	4
	con_05m_m67_a3_001_Max_ Reg.xlsx_RoiSetAuto-46.zip Distance px	shi_04m_m67_a3_001_Max_ Reg.xlsx_RoiSetAuto-86.zip Distance px		4	4
	con_05m_m67_a3_001_Max_ Reg.xlsx_RoiSetAuto-47.zip Distance px	shi_04m_m67_a3_002_Max_ Reg.xlsx_RoiSetAuto-1.zip Distance px		4	4
	con_05m_m67_a3_001_Max_ Reg.xlsx_RoiSetAuto-5.zip Distance px	shi_04m_m67_a3_002_Max_ Reg.xlsx_RoiSetAuto-10.zip Distance px		18	6
	con_05m_m67_a3_001_Max_ Reg.xlsx_RoiSetAuto-6.zip Distance px	shi_04m_m67_a3_002_Max_ Reg.xlsx_RoiSetAuto-11.zip Distance px		5	19
	con_05m_m67_a3_001_Max_ Reg.xlsx_RoiSetAuto-7.zip Distance px	shi_04m_m67_a3_002_Max_ Reg.xlsx_RoiSetAuto-12.zip Distance px		8	10
	con_05m_m67_a3_001_Max_ Reg.xlsx_RoiSetAuto-8.zip Distance px	shi_04m_m67_a3_002_Max_ Reg.xlsx_RoiSetAuto-13.zip Distance px		5	5
	con_05m_m67_a3_001_Max_ Reg.xlsx_RoiSetAuto-9.zip Distance px	shi_04m_m67_a3_002_Max_ Reg.xlsx_RoiSetAuto-14.zip Distance px		36	4
	con_06m_m67_a3_001_Max_ Reg.xlsx_RoiSetAuto-1.zip Distance px	shi_04m_m67_a3_002_Max_ Reg.xlsx_RoiSetAuto-16.zip Distance px		13	4
	con_06m_m67_a3_001_Max_ Reg.xlsx_RoiSetAuto-12.zip Distance px	shi_04m_m67_a3_002_Max_ Reg.xlsx_RoiSetAuto-17.zip Distance px		42	4
	con_06m_m67_a3_001_Max_ Reg.xlsx_RoiSetAuto-14.zip Distance px	shi_04m_m67_a3_002_Max_ Reg.xlsx_RoiSetAuto-18.zip Distance px		4	5
	con_06m_m67_a3_001_Max_ Reg.xlsx_RoiSetAuto-15.zip Distance px	shi_04m_m67_a3_002_Max_ Reg.xlsx_RoiSetAuto-2.zip Distance px		6	6
	con_06m_m67_a3_001_Max_ Reg.xlsx_RoiSetAuto-16.zip Distance px	shi_04m_m67_a3_002_Max_ Reg.xlsx_RoiSetAuto-4.zip Distance px		4	23
	con_06m_m67_a3_001_Max_ Reg.xlsx_RoiSetAuto-17.zip Distance px	shi_04m_m67_a3_002_Max_ Reg.xlsx_RoiSetAuto-5.zip Distance px		4	7
	con_06m_m67_a3_001_Max_ Reg.xlsx_RoiSetAuto-18.zip Distance px	shi_04m_m67_a3_002_Max_ Reg.xlsx_RoiSetAuto-6.zip Distance px		13	7
	con_06m_m67_a3_001_Max_ Reg.xlsx_RoiSetAuto-19.zip Distance px	shi_04m_m67_a3_002_Max_ Reg.xlsx_RoiSetAuto-7.zip Distance px		7	9
	con_06m_m67_a3_001_Max_ Reg.xlsx_RoiSetAuto-2.zip Distance px	shi_04m_m67_a3_002_Max_ Reg.xlsx_RoiSetAuto-8.zip Distance px		6	6
	con_06m_m67_a3_001_Max_ Reg.xlsx_RoiSetAuto-20.zip Distance px	shi_04m_m67_a3_002_Max_ Reg.xlsx_RoiSetAuto-9.zip Distance px		4	4
	con_06m_m67_a3_001_Max_ Reg.xlsx_RoiSetAuto-21.zip Distance px	shi_04m_m67_a3_003_Max_ Reg.xlsx_RoiSetAuto-10.zip Distance px		4	5
	con_06m_m67_a3_001_Max_ Reg.xlsx_RoiSetAuto-22.zip Distance px	shi_04m_m67_a3_003_Max_ Reg.xlsx_RoiSetAuto-11.zip Distance px		32	5
	con_06m_m67_a3_001_Max_ Reg.xlsx_RoiSetAuto-23.zip Distance px	shi_04m_m67_a3_003_Max_ Reg.xlsx_RoiSetAuto-13.zip Distance px		5	22
	con_06m_m67_a3_001_Max_ Reg.xlsx_RoiSetAuto-24.zip Distance px	shi_04m_m67_a3_003_Max_ Reg.xlsx_RoiSetAuto-14.zip Distance px		31	36
	con_06m_m67_a3_001_Max_ Reg.xlsx_RoiSetAuto-25.zip Distance px	shi_04m_m67_a3_003_Max_ Reg.xlsx_RoiSetAuto-15.zip Distance px		5	4
	con_06m_m67_a3_001_Max_ Reg.xlsx_RoiSetAuto-26.zip Distance px	shi_04m_m67_a3_003_Max_ Reg.xlsx_RoiSetAuto-16.zip Distance px		5	6
	con_06m_m67_a3_001_Max_ Reg.xlsx_RoiSetAuto-27.zip Distance px	shi_04m_m67_a3_003_Max_ Reg.xlsx_RoiSetAuto-17.zip Distance px		8	15
	con_06m_m67_a3_001_Max_ Reg.xlsx_RoiSetAuto-29.zip Distance px	shi_04m_m67_a3_003_Max_ Reg.xlsx_RoiSetAuto-18.zip Distance px		5	5
	con_06m_m67_a3_001_Max_ Reg.xlsx_RoiSetAuto-3.zip Distance px	shi_04m_m67_a3_003_Max_ Reg.xlsx_RoiSetAuto-19.zip Distance px		8	7
	con_06m_m67_a3_001_Max_ Reg.xlsx_RoiSetAuto-30.zip Distance px	shi_04m_m67_a3_003_Max_ Reg.xlsx_RoiSetAuto-2.zip Distance px		4	4
	con_06m_m67_a3_001_Max_ Reg.xlsx_RoiSetAuto-31.zip Distance px	shi_04m_m67_a3_003_Max_ Reg.xlsx_RoiSetAuto-20.zip Distance px		26	32
	con_06m_m67_a3_001_Max_ Reg.xlsx_RoiSetAuto-32.zip Distance px	shi_04m_m67_a3_003_Max_ Reg.xlsx_RoiSetAuto-21.zip Distance px		11	4
	con_06m_m67_a3_001_Max_ Reg.xlsx_RoiSetAuto-33.zip Distance px	shi_04m_m67_a3_003_Max_ Reg.xlsx_RoiSetAuto-22.zip Distance px		11	6
	con_06m_m67_a3_001_Max_ Reg.xlsx_RoiSetAuto-35.zip Distance px	shi_04m_m67_a3_003_Max_ Reg.xlsx_RoiSetAuto-23.zip Distance px		6	29
	con_06m_m67_a3_001_Max_ Reg.xlsx_RoiSetAuto-37.zip Distance px	shi_04m_m67_a3_003_Max_ Reg.xlsx_RoiSetAuto-24.zip Distance px		5	11
	con_06m_m67_a3_001_Max_ Reg.xlsx_RoiSetAuto-39.zip Distance px	shi_04m_m67_a3_003_Max_ Reg.xlsx_RoiSetAuto-25.zip Distance px		17	19
	con_06m_m67_a3_001_Max_ Reg.xlsx_RoiSetAuto-41.zip Distance px	shi_04m_m67_a3_003_Max_ Reg.xlsx_RoiSetAuto-26.zip Distance px		10	9
	con_06m_m67_a3_001_Max_ Reg.xlsx_RoiSetAuto-42.zip Distance px	shi_04m_m67_a3_003_Max_ Reg.xlsx_RoiSetAuto-27.zip Distance px		12	7
	con_06m_m67_a3_001_Max_ Reg.xlsx_RoiSetAuto-43.zip Distance px	shi_04m_m67_a3_003_Max_ Reg.xlsx_RoiSetAuto-28.zip Distance px		16	11
	con_06m_m67_a3_001_Max_ Reg.xlsx_RoiSetAuto-44.zip Distance px	shi_04m_m67_a3_003_Max_ Reg.xlsx_RoiSetAuto-29.zip Distance px		17	9
	con_06m_m67_a3_001_Max_ Reg.xlsx_RoiSetAuto-46.zip Distance px	shi_04m_m67_a3_003_Max_ Reg.xlsx_RoiSetAuto-3.zip Distance px		29	9
	con_06m_m67_a3_001_Max_ Reg.xlsx_RoiSetAuto-47.zip Distance px	shi_04m_m67_a3_003_Max_ Reg.xlsx_RoiSetAuto-30.zip Distance px		7	10
	con_06m_m67_a3_001_Max_ Reg.xlsx_RoiSetAuto-48.zip Distance px	shi_04m_m67_a3_003_Max_ Reg.xlsx_RoiSetAuto-31.zip Distance px		21	14
	con_06m_m67_a3_001_Max_ Reg.xlsx_RoiSetAuto-49.zip Distance px	shi_04m_m67_a3_003_Max_ Reg.xlsx_RoiSetAuto-32.zip Distance px		4	4
	con_06m_m67_a3_001_Max_ Reg.xlsx_RoiSetAuto-50.zip Distance px	shi_04m_m67_a3_003_Max_ Reg.xlsx_RoiSetAuto-33.zip Distance px		4	6
	con_06m_m67_a3_001_Max_ Reg.xlsx_RoiSetAuto-51.zip Distance px	shi_04m_m67_a3_003_Max_ Reg.xlsx_RoiSetAuto-34.zip Distance px		7	25
	con_06m_m67_a3_001_Max_ Reg.xlsx_RoiSetAuto-52.zip Distance px	shi_04m_m67_a3_003_Max_ Reg.xlsx_RoiSetAuto-35.zip Distance px		35	10
	con_06m_m67_a3_001_Max_ Reg.xlsx_RoiSetAuto-54.zip Distance px	shi_04m_m67_a3_003_Max_ Reg.xlsx_RoiSetAuto-36.zip Distance px		5	4
	con_06m_m67_a3_001_Max_ Reg.xlsx_RoiSetAuto-55.zip Distance px	shi_04m_m67_a3_003_Max_ Reg.xlsx_RoiSetAuto-37.zip Distance px		5	4
	con_06m_m67_a3_001_Max_ Reg.xlsx_RoiSetAuto-57.zip Distance px	shi_04m_m67_a3_003_Max_ Reg.xlsx_RoiSetAuto-38.zip Distance px		23	14
	con_06m_m67_a3_001_Max_ Reg.xlsx_RoiSetAuto-58.zip Distance px	shi_04m_m67_a3_003_Max_ Reg.xlsx_RoiSetAuto-39.zip Distance px		4	12
	con_06m_m67_a3_001_Max_ Reg.xlsx_RoiSetAuto-59.zip Distance px	shi_04m_m67_a3_003_Max_ Reg.xlsx_RoiSetAuto-4.zip Distance px		38	20
	con_06m_m67_a3_001_Max_ Reg.xlsx_RoiSetAuto-6.zip Distance px	shi_04m_m67_a3_003_Max_ Reg.xlsx_RoiSetAuto-40.zip Distance px		16	7
	con_06m_m67_a3_001_Max_ Reg.xlsx_RoiSetAuto-61.zip Distance px	shi_04m_m67_a3_003_Max_ Reg.xlsx_RoiSetAuto-41.zip Distance px		5	4
	con_06m_m67_a3_001_Max_ Reg.xlsx_RoiSetAuto-63.zip Distance px	shi_04m_m67_a3_003_Max_ Reg.xlsx_RoiSetAuto-42.zip Distance px		6	4
	con_06m_m67_a3_001_Max_ Reg.xlsx_RoiSetAuto-65.zip Distance px	shi_04m_m67_a3_003_Max_ Reg.xlsx_RoiSetAuto-43.zip Distance px		4	5
	con_06m_m67_a3_001_Max_ Reg.xlsx_RoiSetAuto-66.zip Distance px	shi_04m_m67_a3_003_Max_ Reg.xlsx_RoiSetAuto-44.zip Distance px		4	4
	con_06m_m67_a3_001_Max_ Reg.xlsx_RoiSetAuto-68.zip Distance px	shi_04m_m67_a3_003_Max_ Reg.xlsx_RoiSetAuto-45.zip Distance px		5	10
	con_06m_m67_a3_001_Max_ Reg.xlsx_RoiSetAuto-8.zip Distance px	shi_04m_m67_a3_003_Max_ Reg.xlsx_RoiSetAuto-46.zip Distance px		8	9
	con_06m_m67_a3_001_Max_ Reg.xlsx_RoiSetAuto-9.zip Distance px	shi_04m_m67_a3_003_Max_ Reg.xlsx_RoiSetAuto-47.zip Distance px		22	9
	con_06m_m67_a3_002_Max_ Reg.xlsx_RoiSetAuto-1.zip Distance px	shi_04m_m67_a3_003_Max_ Reg.xlsx_RoiSetAuto-48.zip Distance px		10	12
	con_06m_m67_a3_002_Max_ Reg.xlsx_RoiSetAuto-10.zip Distance px	shi_04m_m67_a3_003_Max_ Reg.xlsx_RoiSetAuto-49.zip Distance px		7	4
	con_06m_m67_a3_002_Max_ Reg.xlsx_RoiSetAuto-11.zip Distance px	shi_04m_m67_a3_003_Max_ Reg.xlsx_RoiSetAuto-5.zip Distance px		11	52
	con_06m_m67_a3_002_Max_ Reg.xlsx_RoiSetAuto-12.zip Distance px	shi_04m_m67_a3_003_Max_ Reg.xlsx_RoiSetAuto-50.zip Distance px		20	19
	con_06m_m67_a3_002_Max_ Reg.xlsx_RoiSetAuto-13.zip Distance px	shi_04m_m67_a3_003_Max_ Reg.xlsx_RoiSetAuto-51.zip Distance px		5	4
	con_06m_m67_a3_002_Max_ Reg.xlsx_RoiSetAuto-15.zip Distance px	shi_04m_m67_a3_003_Max_ Reg.xlsx_RoiSetAuto-52.zip Distance px		43	4
	con_06m_m67_a3_002_Max_ Reg.xlsx_RoiSetAuto-16.zip Distance px	shi_04m_m67_a3_003_Max_ Reg.xlsx_RoiSetAuto-53.zip Distance px		31	10
	con_06m_m67_a3_002_Max_ Reg.xlsx_RoiSetAuto-17.zip Distance px	shi_04m_m67_a3_003_Max_ Reg.xlsx_RoiSetAuto-54.zip Distance px		9	5
	con_06m_m67_a3_002_Max_ Reg.xlsx_RoiSetAuto-18.zip Distance px	shi_04m_m67_a3_003_Max_ Reg.xlsx_RoiSetAuto-55.zip Distance px		8	42
	con_06m_m67_a3_002_Max_ Reg.xlsx_RoiSetAuto-19.zip Distance px	shi_04m_m67_a3_003_Max_ Reg.xlsx_RoiSetAuto-56.zip Distance px		6	10
	con_06m_m67_a3_002_Max_ Reg.xlsx_RoiSetAuto-2.zip Distance px	shi_04m_m67_a3_003_Max_ Reg.xlsx_RoiSetAuto-57.zip Distance px		14	4
	con_06m_m67_a3_002_Max_ Reg.xlsx_RoiSetAuto-22.zip Distance px	shi_04m_m67_a3_003_Max_ Reg.xlsx_RoiSetAuto-58.zip Distance px		9	11
	con_06m_m67_a3_002_Max_ Reg.xlsx_RoiSetAuto-23.zip Distance px	shi_04m_m67_a3_003_Max_ Reg.xlsx_RoiSetAuto-59.zip Distance px		4	19
	con_06m_m67_a3_002_Max_ Reg.xlsx_RoiSetAuto-24.zip Distance px	shi_04m_m67_a3_003_Max_ Reg.xlsx_RoiSetAuto-6.zip Distance px		29	10
	con_06m_m67_a3_002_Max_ Reg.xlsx_RoiSetAuto-25.zip Distance px	shi_04m_m67_a3_003_Max_ Reg.xlsx_RoiSetAuto-60.zip Distance px		37	5
	con_06m_m67_a3_002_Max_ Reg.xlsx_RoiSetAuto-27.zip Distance px	shi_04m_m67_a3_003_Max_ Reg.xlsx_RoiSetAuto-61.zip Distance px		5	12
	con_06m_m67_a3_002_Max_ Reg.xlsx_RoiSetAuto-29.zip Distance px	shi_04m_m67_a3_003_Max_ Reg.xlsx_RoiSetAuto-62.zip Distance px		7	6
	con_06m_m67_a3_002_Max_ Reg.xlsx_RoiSetAuto-3.zip Distance px	shi_04m_m67_a3_003_Max_ Reg.xlsx_RoiSetAuto-63.zip Distance px		18	5
	con_06m_m67_a3_002_Max_ Reg.xlsx_RoiSetAuto-30.zip Distance px	shi_04m_m67_a3_003_Max_ Reg.xlsx_RoiSetAuto-64.zip Distance px		13	7
	con_06m_m67_a3_002_Max_ Reg.xlsx_RoiSetAuto-31.zip Distance px	shi_04m_m67_a3_003_Max_ Reg.xlsx_RoiSetAuto-8.zip Distance px		10	6
	con_06m_m67_a3_002_Max_ Reg.xlsx_RoiSetAuto-32.zip Distance px	shi_04m_m67_a3_003_Max_ Reg.xlsx_RoiSetAuto-9.zip Distance px		12	104
	con_06m_m67_a3_002_Max_ Reg.xlsx_RoiSetAuto-33.zip Distance px	shi_05m_m67_a3_001_Max_ Reg.xlsx_RoiSetAuto-1.zip Distance px		6	4
	con_06m_m67_a3_002_Max_ Reg.xlsx_RoiSetAuto-4.zip Distance px	shi_05m_m67_a3_001_Max_ Reg.xlsx_RoiSetAuto-10.zip Distance px		9	5
	con_06m_m67_a3_002_Max_ Reg.xlsx_RoiSetAuto-5.zip Distance px	shi_05m_m67_a3_001_Max_ Reg.xlsx_RoiSetAuto-11.zip Distance px		15	4
	con_06m_m67_a3_002_Max_ Reg.xlsx_RoiSetAuto-6.zip Distance px	shi_05m_m67_a3_001_Max_ Reg.xlsx_RoiSetAuto-12.zip Distance px		13	4
	con_06m_m67_a3_002_Max_ Reg.xlsx_RoiSetAuto-7.zip Distance px	shi_05m_m67_a3_001_Max_ Reg.xlsx_RoiSetAuto-13.zip Distance px		17	33
	con_06m_m67_a3_002_Max_ Reg.xlsx_RoiSetAuto-8.zip Distance px	shi_05m_m67_a3_001_Max_ Reg.xlsx_RoiSetAuto-14.zip Distance px		6	17
	con_06m_m67_a3_002_Max_ Reg.xlsx_RoiSetAuto-9.zip Distance px	shi_05m_m67_a3_001_Max_ Reg.xlsx_RoiSetAuto-15.zip Distance px		6	10
	con_07m_m67_a3_001_Max_ Reg.xlsx_RoiSetAuto-10.zip Distance px	shi_05m_m67_a3_001_Max_ Reg.xlsx_RoiSetAuto-17.zip Distance px		8	13
	con_07m_m67_a3_001_Max_ Reg.xlsx_RoiSetAuto-13.zip Distance px	shi_05m_m67_a3_001_Max_ Reg.xlsx_RoiSetAuto-18.zip Distance px		15	6
	con_07m_m67_a3_001_Max_ Reg.xlsx_RoiSetAuto-15.zip Distance px	shi_05m_m67_a3_001_Max_ Reg.xlsx_RoiSetAuto-19.zip Distance px		5	8
	con_07m_m67_a3_001_Max_ Reg.xlsx_RoiSetAuto-16.zip Distance px	shi_05m_m67_a3_001_Max_ Reg.xlsx_RoiSetAuto-2.zip Distance px		16	4
	con_07m_m67_a3_001_Max_ Reg.xlsx_RoiSetAuto-17.zip Distance px	shi_05m_m67_a3_001_Max_ Reg.xlsx_RoiSetAuto-20.zip Distance px		4	15
	con_07m_m67_a3_001_Max_ Reg.xlsx_RoiSetAuto-2.zip Distance px	shi_05m_m67_a3_001_Max_ Reg.xlsx_RoiSetAuto-21.zip Distance px		7	8
	con_07m_m67_a3_001_Max_ Reg.xlsx_RoiSetAuto-22.zip Distance px	shi_05m_m67_a3_001_Max_ Reg.xlsx_RoiSetAuto-22.zip Distance px		9	10
	con_07m_m67_a3_001_Max_ Reg.xlsx_RoiSetAuto-24.zip Distance px	shi_05m_m67_a3_001_Max_ Reg.xlsx_RoiSetAuto-23.zip Distance px		6	5
	con_07m_m67_a3_001_Max_ Reg.xlsx_RoiSetAuto-26.zip Distance px	shi_05m_m67_a3_001_Max_ Reg.xlsx_RoiSetAuto-24.zip Distance px		65	4
	con_07m_m67_a3_001_Max_ Reg.xlsx_RoiSetAuto-27.zip Distance px	shi_05m_m67_a3_001_Max_ Reg.xlsx_RoiSetAuto-26.zip Distance px		41	5
	con_07m_m67_a3_001_Max_ Reg.xlsx_RoiSetAuto-28.zip Distance px	shi_05m_m67_a3_001_Max_ Reg.xlsx_RoiSetAuto-27.zip Distance px		4	8
	con_07m_m67_a3_001_Max_ Reg.xlsx_RoiSetAuto-3.zip Distance px	shi_05m_m67_a3_001_Max_ Reg.xlsx_RoiSetAuto-28.zip Distance px		14	4
	con_07m_m67_a3_001_Max_ Reg.xlsx_RoiSetAuto-30.zip Distance px	shi_05m_m67_a3_001_Max_ Reg.xlsx_RoiSetAuto-29.zip Distance px		19	11
	con_07m_m67_a3_001_Max_ Reg.xlsx_RoiSetAuto-4.zip Distance px	shi_05m_m67_a3_001_Max_ Reg.xlsx_RoiSetAuto-3.zip Distance px		129	4
	con_07m_m67_a3_001_Max_ Reg.xlsx_RoiSetAuto-5.zip Distance px	shi_05m_m67_a3_001_Max_ Reg.xlsx_RoiSetAuto-30.zip Distance px		6	14
	con_07m_m67_a3_001_Max_ Reg.xlsx_RoiSetAuto-8.zip Distance px	shi_05m_m67_a3_001_Max_ Reg.xlsx_RoiSetAuto-31.zip Distance px		7	10
	con_07m_m67_a3_002_Max_ Reg.xlsx_RoiSetAuto-1.zip Distance px	shi_05m_m67_a3_001_Max_ Reg.xlsx_RoiSetAuto-32.zip Distance px		16	16
	con_07m_m67_a3_002_Max_ Reg.xlsx_RoiSetAuto-10.zip Distance px	shi_05m_m67_a3_001_Max_ Reg.xlsx_RoiSetAuto-33.zip Distance px		4	5
	con_07m_m67_a3_002_Max_ Reg.xlsx_RoiSetAuto-12.zip Distance px	shi_05m_m67_a3_001_Max_ Reg.xlsx_RoiSetAuto-34.zip Distance px		4	4
	con_07m_m67_a3_002_Max_ Reg.xlsx_RoiSetAuto-13.zip Distance px	shi_05m_m67_a3_001_Max_ Reg.xlsx_RoiSetAuto-36.zip Distance px		10	5
	con_07m_m67_a3_002_Max_ Reg.xlsx_RoiSetAuto-15.zip Distance px	shi_05m_m67_a3_001_Max_ Reg.xlsx_RoiSetAuto-37.zip Distance px		5	20
	con_07m_m67_a3_002_Max_ Reg.xlsx_RoiSetAuto-17.zip Distance px	shi_05m_m67_a3_001_Max_ Reg.xlsx_RoiSetAuto-38.zip Distance px		5	8
	con_07m_m67_a3_002_Max_ Reg.xlsx_RoiSetAuto-18.zip Distance px	shi_05m_m67_a3_001_Max_ Reg.xlsx_RoiSetAuto-39.zip Distance px		39	4
	con_07m_m67_a3_002_Max_ Reg.xlsx_RoiSetAuto-19.zip Distance px	shi_05m_m67_a3_001_Max_ Reg.xlsx_RoiSetAuto-4.zip Distance px		5	6
	con_07m_m67_a3_002_Max_ Reg.xlsx_RoiSetAuto-2.zip Distance px	shi_05m_m67_a3_001_Max_ Reg.xlsx_RoiSetAuto-5.zip Distance px		10	4
	con_07m_m67_a3_002_Max_ Reg.xlsx_RoiSetAuto-21.zip Distance px	shi_05m_m67_a3_001_Max_ Reg.xlsx_RoiSetAuto-7.zip Distance px		4	4
	con_07m_m67_a3_002_Max_ Reg.xlsx_RoiSetAuto-22.zip Distance px	shi_05m_m67_a3_001_Max_ Reg.xlsx_RoiSetAuto-8.zip Distance px		5	6
	con_07m_m67_a3_002_Max_ Reg.xlsx_RoiSetAuto-23.zip Distance px	shi_05m_m67_a3_001_Max_ Reg.xlsx_RoiSetAuto-9.zip Distance px		13	5
	con_07m_m67_a3_002_Max_ Reg.xlsx_RoiSetAuto-24.zip Distance px	shi_05m_m67_a3_002_Max_ Reg.xlsx_RoiSetAuto-1.zip Distance px		8	6
	con_07m_m67_a3_002_Max_ Reg.xlsx_RoiSetAuto-26.zip Distance px	shi_05m_m67_a3_002_Max_ Reg.xlsx_RoiSetAuto-10.zip Distance px		29	16
	con_07m_m67_a3_002_Max_ Reg.xlsx_RoiSetAuto-27.zip Distance px	shi_05m_m67_a3_002_Max_ Reg.xlsx_RoiSetAuto-100.zip Distance px		42	6
	con_07m_m67_a3_002_Max_ Reg.xlsx_RoiSetAuto-28.zip Distance px	shi_05m_m67_a3_002_Max_ Reg.xlsx_RoiSetAuto-101.zip Distance px		4	7
	con_07m_m67_a3_002_Max_ Reg.xlsx_RoiSetAuto-29.zip Distance px	shi_05m_m67_a3_002_Max_ Reg.xlsx_RoiSetAuto-102.zip Distance px		18	8
	con_07m_m67_a3_002_Max_ Reg.xlsx_RoiSetAuto-3.zip Distance px	shi_05m_m67_a3_002_Max_ Reg.xlsx_RoiSetAuto-104.zip Distance px		26	7
	con_07m_m67_a3_002_Max_ Reg.xlsx_RoiSetAuto-30.zip Distance px	shi_05m_m67_a3_002_Max_ Reg.xlsx_RoiSetAuto-105.zip Distance px		7	17
	con_07m_m67_a3_002_Max_ Reg.xlsx_RoiSetAuto-31.zip Distance px	shi_05m_m67_a3_002_Max_ Reg.xlsx_RoiSetAuto-106.zip Distance px		4	6
	con_07m_m67_a3_002_Max_ Reg.xlsx_RoiSetAuto-32.zip Distance px	shi_05m_m67_a3_002_Max_ Reg.xlsx_RoiSetAuto-107.zip Distance px		4	10
	con_07m_m67_a3_002_Max_ Reg.xlsx_RoiSetAuto-33.zip Distance px	shi_05m_m67_a3_002_Max_ Reg.xlsx_RoiSetAuto-108.zip Distance px		18	5
	con_07m_m67_a3_002_Max_ Reg.xlsx_RoiSetAuto-34.zip Distance px	shi_05m_m67_a3_002_Max_ Reg.xlsx_RoiSetAuto-11.zip Distance px		4	49
	con_07m_m67_a3_002_Max_ Reg.xlsx_RoiSetAuto-35.zip Distance px	shi_05m_m67_a3_002_Max_ Reg.xlsx_RoiSetAuto-110.zip Distance px		4	8
	con_07m_m67_a3_002_Max_ Reg.xlsx_RoiSetAuto-37.zip Distance px	shi_05m_m67_a3_002_Max_ Reg.xlsx_RoiSetAuto-111.zip Distance px		5	4
	con_07m_m67_a3_002_Max_ Reg.xlsx_RoiSetAuto-38.zip Distance px	shi_05m_m67_a3_002_Max_ Reg.xlsx_RoiSetAuto-112.zip Distance px		40	8
	con_07m_m67_a3_002_Max_ Reg.xlsx_RoiSetAuto-39.zip Distance px	shi_05m_m67_a3_002_Max_ Reg.xlsx_RoiSetAuto-113.zip Distance px		13	18
	con_07m_m67_a3_002_Max_ Reg.xlsx_RoiSetAuto-4.zip Distance px	shi_05m_m67_a3_002_Max_ Reg.xlsx_RoiSetAuto-116.zip Distance px		10	6
	con_07m_m67_a3_002_Max_ Reg.xlsx_RoiSetAuto-40.zip Distance px	shi_05m_m67_a3_002_Max_ Reg.xlsx_RoiSetAuto-117.zip Distance px		47	16
	con_07m_m67_a3_002_Max_ Reg.xlsx_RoiSetAuto-41.zip Distance px	shi_05m_m67_a3_002_Max_ Reg.xlsx_RoiSetAuto-118.zip Distance px		6	6
	con_07m_m67_a3_002_Max_ Reg.xlsx_RoiSetAuto-42.zip Distance px	shi_05m_m67_a3_002_Max_ Reg.xlsx_RoiSetAuto-119.zip Distance px		4	6
	con_07m_m67_a3_002_Max_ Reg.xlsx_RoiSetAuto-43.zip Distance px	shi_05m_m67_a3_002_Max_ Reg.xlsx_RoiSetAuto-12.zip Distance px		4	6
	con_07m_m67_a3_002_Max_ Reg.xlsx_RoiSetAuto-44.zip Distance px	shi_05m_m67_a3_002_Max_ Reg.xlsx_RoiSetAuto-120.zip Distance px		25	6
	con_07m_m67_a3_002_Max_ Reg.xlsx_RoiSetAuto-45.zip Distance px	shi_05m_m67_a3_002_Max_ Reg.xlsx_RoiSetAuto-121.zip Distance px		4	4
	con_07m_m67_a3_002_Max_ Reg.xlsx_RoiSetAuto-46.zip Distance px	shi_05m_m67_a3_002_Max_ Reg.xlsx_RoiSetAuto-122.zip Distance px		7	6
	con_07m_m67_a3_002_Max_ Reg.xlsx_RoiSetAuto-47.zip Distance px	shi_05m_m67_a3_002_Max_ Reg.xlsx_RoiSetAuto-123.zip Distance px		4	4
	con_07m_m67_a3_002_Max_ Reg.xlsx_RoiSetAuto-48.zip Distance px	shi_05m_m67_a3_002_Max_ Reg.xlsx_RoiSetAuto-124.zip Distance px		4	5
	con_07m_m67_a3_002_Max_ Reg.xlsx_RoiSetAuto-49.zip Distance px	shi_05m_m67_a3_002_Max_ Reg.xlsx_RoiSetAuto-125.zip Distance px		11	4
	con_07m_m67_a3_002_Max_ Reg.xlsx_RoiSetAuto-5.zip Distance px	shi_05m_m67_a3_002_Max_ Reg.xlsx_RoiSetAuto-126.zip Distance px		19	4
	con_07m_m67_a3_002_Max_ Reg.xlsx_RoiSetAuto-50.zip Distance px	shi_05m_m67_a3_002_Max_ Reg.xlsx_RoiSetAuto-127.zip Distance px		5	4
	con_07m_m67_a3_002_Max_ Reg.xlsx_RoiSetAuto-51.zip Distance px	shi_05m_m67_a3_002_Max_ Reg.xlsx_RoiSetAuto-13.zip Distance px		5	4
	con_07m_m67_a3_002_Max_ Reg.xlsx_RoiSetAuto-53.zip Distance px	shi_05m_m67_a3_002_Max_ Reg.xlsx_RoiSetAuto-14.zip Distance px		4	24
	con_07m_m67_a3_002_Max_ Reg.xlsx_RoiSetAuto-54.zip Distance px	shi_05m_m67_a3_002_Max_ Reg.xlsx_RoiSetAuto-16.zip Distance px		7	59
	con_07m_m67_a3_002_Max_ Reg.xlsx_RoiSetAuto-56.zip Distance px	shi_05m_m67_a3_002_Max_ Reg.xlsx_RoiSetAuto-17.zip Distance px		10	5
	con_07m_m67_a3_002_Max_ Reg.xlsx_RoiSetAuto-57.zip Distance px	shi_05m_m67_a3_002_Max_ Reg.xlsx_RoiSetAuto-18.zip Distance px		43	15
	con_07m_m67_a3_002_Max_ Reg.xlsx_RoiSetAuto-58.zip Distance px	shi_05m_m67_a3_002_Max_ Reg.xlsx_RoiSetAuto-19.zip Distance px		4	4
	con_07m_m67_a3_002_Max_ Reg.xlsx_RoiSetAuto-59.zip Distance px	shi_05m_m67_a3_002_Max_ Reg.xlsx_RoiSetAuto-2.zip Distance px		19	102
	con_07m_m67_a3_002_Max_ Reg.xlsx_RoiSetAuto-6.zip Distance px	shi_05m_m67_a3_002_Max_ Reg.xlsx_RoiSetAuto-20.zip Distance px		23	8
	con_07m_m67_a3_002_Max_ Reg.xlsx_RoiSetAuto-60.zip Distance px	shi_05m_m67_a3_002_Max_ Reg.xlsx_RoiSetAuto-21.zip Distance px		6	53
	con_07m_m67_a3_002_Max_ Reg.xlsx_RoiSetAuto-7.zip Distance px	shi_05m_m67_a3_002_Max_ Reg.xlsx_RoiSetAuto-22.zip Distance px		52	5
	con_07m_m67_a3_002_Max_ Reg.xlsx_RoiSetAuto-8.zip Distance px	shi_05m_m67_a3_002_Max_ Reg.xlsx_RoiSetAuto-24.zip Distance px		29	4
	con_07m_m67_a3_003_Max_ Reg.xlsx_RoiSetAuto-1.zip Distance px	shi_05m_m67_a3_002_Max_ Reg.xlsx_RoiSetAuto-27.zip Distance px		10	10
	con_07m_m67_a3_003_Max_ Reg.xlsx_RoiSetAuto-10.zip Distance px	shi_05m_m67_a3_002_Max_ Reg.xlsx_RoiSetAuto-28.zip Distance px		36	7
	con_07m_m67_a3_003_Max_ Reg.xlsx_RoiSetAuto-11.zip Distance px	shi_05m_m67_a3_002_Max_ Reg.xlsx_RoiSetAuto-29.zip Distance px		14	5
	con_07m_m67_a3_003_Max_ Reg.xlsx_RoiSetAuto-12.zip Distance px	shi_05m_m67_a3_002_Max_ Reg.xlsx_RoiSetAuto-3.zip Distance px		4	40
	con_07m_m67_a3_003_Max_ Reg.xlsx_RoiSetAuto-13.zip Distance px	shi_05m_m67_a3_002_Max_ Reg.xlsx_RoiSetAuto-30.zip Distance px		7	9
	con_07m_m67_a3_003_Max_ Reg.xlsx_RoiSetAuto-14.zip Distance px	shi_05m_m67_a3_002_Max_ Reg.xlsx_RoiSetAuto-32.zip Distance px		8	10
	con_07m_m67_a3_003_Max_ Reg.xlsx_RoiSetAuto-15.zip Distance px	shi_05m_m67_a3_002_Max_ Reg.xlsx_RoiSetAuto-33.zip Distance px		17	19
	con_07m_m67_a3_003_Max_ Reg.xlsx_RoiSetAuto-16.zip Distance px	shi_05m_m67_a3_002_Max_ Reg.xlsx_RoiSetAuto-34.zip Distance px		5	13
	con_07m_m67_a3_003_Max_ Reg.xlsx_RoiSetAuto-17.zip Distance px	shi_05m_m67_a3_002_Max_ Reg.xlsx_RoiSetAuto-35.zip Distance px		5	8
	con_07m_m67_a3_003_Max_ Reg.xlsx_RoiSetAuto-18.zip Distance px	shi_05m_m67_a3_002_Max_ Reg.xlsx_RoiSetAuto-36.zip Distance px		5	4
	con_07m_m67_a3_003_Max_ Reg.xlsx_RoiSetAuto-19.zip Distance px	shi_05m_m67_a3_002_Max_ Reg.xlsx_RoiSetAuto-38.zip Distance px		4	6
	con_07m_m67_a3_003_Max_ Reg.xlsx_RoiSetAuto-2.zip Distance px	shi_05m_m67_a3_002_Max_ Reg.xlsx_RoiSetAuto-39.zip Distance px		164	44
	con_07m_m67_a3_003_Max_ Reg.xlsx_RoiSetAuto-20.zip Distance px	shi_05m_m67_a3_002_Max_ Reg.xlsx_RoiSetAuto-4.zip Distance px		15	42
	con_07m_m67_a3_003_Max_ Reg.xlsx_RoiSetAuto-21.zip Distance px	shi_05m_m67_a3_002_Max_ Reg.xlsx_RoiSetAuto-40.zip Distance px		6	12
	con_07m_m67_a3_003_Max_ Reg.xlsx_RoiSetAuto-22.zip Distance px	shi_05m_m67_a3_002_Max_ Reg.xlsx_RoiSetAuto-41.zip Distance px		7	6
	con_07m_m67_a3_003_Max_ Reg.xlsx_RoiSetAuto-23.zip Distance px	shi_05m_m67_a3_002_Max_ Reg.xlsx_RoiSetAuto-43.zip Distance px		4	12
	con_07m_m67_a3_003_Max_ Reg.xlsx_RoiSetAuto-24.zip Distance px	shi_05m_m67_a3_002_Max_ Reg.xlsx_RoiSetAuto-44.zip Distance px		7	12
	con_07m_m67_a3_003_Max_ Reg.xlsx_RoiSetAuto-26.zip Distance px	shi_05m_m67_a3_002_Max_ Reg.xlsx_RoiSetAuto-45.zip Distance px		5	5
	con_07m_m67_a3_003_Max_ Reg.xlsx_RoiSetAuto-27.zip Distance px	shi_05m_m67_a3_002_Max_ Reg.xlsx_RoiSetAuto-46.zip Distance px		12	5
	con_07m_m67_a3_003_Max_ Reg.xlsx_RoiSetAuto-28.zip Distance px	shi_05m_m67_a3_002_Max_ Reg.xlsx_RoiSetAuto-47.zip Distance px		7	4
	con_07m_m67_a3_003_Max_ Reg.xlsx_RoiSetAuto-3.zip Distance px	shi_05m_m67_a3_002_Max_ Reg.xlsx_RoiSetAuto-48.zip Distance px		4	6
	con_07m_m67_a3_003_Max_ Reg.xlsx_RoiSetAuto-30.zip Distance px	shi_05m_m67_a3_002_Max_ Reg.xlsx_RoiSetAuto-49.zip Distance px		21	8
	con_07m_m67_a3_003_Max_ Reg.xlsx_RoiSetAuto-31.zip Distance px	shi_05m_m67_a3_002_Max_ Reg.xlsx_RoiSetAuto-5.zip Distance px		7	146
	con_07m_m67_a3_003_Max_ Reg.xlsx_RoiSetAuto-4.zip Distance px	shi_05m_m67_a3_002_Max_ Reg.xlsx_RoiSetAuto-50.zip Distance px		4	7
	con_07m_m67_a3_003_Max_ Reg.xlsx_RoiSetAuto-5.zip Distance px	shi_05m_m67_a3_002_Max_ Reg.xlsx_RoiSetAuto-51.zip Distance px		7	10
	con_07m_m67_a3_003_Max_ Reg.xlsx_RoiSetAuto-6.zip Distance px	shi_05m_m67_a3_002_Max_ Reg.xlsx_RoiSetAuto-52.zip Distance px		5	4
	con_07m_m67_a3_003_Max_ Reg.xlsx_RoiSetAuto-7.zip Distance px	shi_05m_m67_a3_002_Max_ Reg.xlsx_RoiSetAuto-53.zip Distance px		4	5
	con_07m_m67_a3_003_Max_ Reg.xlsx_RoiSetAuto-8.zip Distance px	shi_05m_m67_a3_002_Max_ Reg.xlsx_RoiSetAuto-54.zip Distance px		8	27
	con_07m_m67_a3_003_Max_ Reg.xlsx_RoiSetAuto-9.zip Distance px	shi_05m_m67_a3_002_Max_ Reg.xlsx_RoiSetAuto-55.zip Distance px		12	5
	con_08m_m67_a3_002_Max_ Reg.xlsx_RoiSetAuto-1.zip Distance px	shi_05m_m67_a3_002_Max_ Reg.xlsx_RoiSetAuto-57.zip Distance px		17	36
	con_08m_m67_a3_002_Max_ Reg.xlsx_RoiSetAuto-32.zip Distance px	shi_05m_m67_a3_002_Max_ Reg.xlsx_RoiSetAuto-58.zip Distance px		39	4
	con_08m_m67_a3_002_Max_ Reg.xlsx_RoiSetAuto-33.zip Distance px	shi_05m_m67_a3_002_Max_ Reg.xlsx_RoiSetAuto-6.zip Distance px		12	6
	con_08m_m67_a3_002_Max_ Reg.xlsx_RoiSetAuto-36.zip Distance px	shi_05m_m67_a3_002_Max_ Reg.xlsx_RoiSetAuto-60.zip Distance px		26	8
	con_08m_m67_a3_002_Max_ Reg.xlsx_RoiSetAuto-37.zip Distance px	shi_05m_m67_a3_002_Max_ Reg.xlsx_RoiSetAuto-61.zip Distance px		12	4
	con_08m_m67_a3_002_Max_ Reg.xlsx_RoiSetAuto-38.zip Distance px	shi_05m_m67_a3_002_Max_ Reg.xlsx_RoiSetAuto-62.zip Distance px		4	7
	con_08m_m67_a3_002_Max_ Reg.xlsx_RoiSetAuto-40.zip Distance px	shi_05m_m67_a3_002_Max_ Reg.xlsx_RoiSetAuto-63.zip Distance px		17	4
	con_08m_m67_a3_002_Max_ Reg.xlsx_RoiSetAuto-41.zip Distance px	shi_05m_m67_a3_002_Max_ Reg.xlsx_RoiSetAuto-64.zip Distance px		6	4
	con_08m_m67_a3_002_Max_ Reg.xlsx_RoiSetAuto-45.zip Distance px	shi_05m_m67_a3_002_Max_ Reg.xlsx_RoiSetAuto-66.zip Distance px		4	7
	con_08m_m67_a3_002_Max_ Reg.xlsx_RoiSetAuto-46.zip Distance px	shi_05m_m67_a3_002_Max_ Reg.xlsx_RoiSetAuto-70.zip Distance px		33	4
	con_08m_m67_a3_002_Max_ Reg.xlsx_RoiSetAuto-48.zip Distance px	shi_05m_m67_a3_002_Max_ Reg.xlsx_RoiSetAuto-71.zip Distance px		6	4
	con_08m_m67_a3_002_Max_ Reg.xlsx_RoiSetAuto-51.zip Distance px	shi_05m_m67_a3_002_Max_ Reg.xlsx_RoiSetAuto-73.zip Distance px		12	11
	con_08m_m67_a3_002_Max_ Reg.xlsx_RoiSetAuto-52.zip Distance px	shi_05m_m67_a3_002_Max_ Reg.xlsx_RoiSetAuto-75.zip Distance px		15	10
	con_08m_m67_a3_002_Max_ Reg.xlsx_RoiSetAuto-53.zip Distance px	shi_05m_m67_a3_002_Max_ Reg.xlsx_RoiSetAuto-76.zip Distance px		6	6
	con_08m_m67_a3_002_Max_ Reg.xlsx_RoiSetAuto-61.zip Distance px	shi_05m_m67_a3_002_Max_ Reg.xlsx_RoiSetAuto-77.zip Distance px		6	6
	con_08m_m67_a3_002_Max_ Reg.xlsx_RoiSetAuto-65.zip Distance px	shi_05m_m67_a3_002_Max_ Reg.xlsx_RoiSetAuto-79.zip Distance px		4	4
	con_08m_m67_a3_002_Max_ Reg.xlsx_RoiSetAuto-70.zip Distance px	shi_05m_m67_a3_002_Max_ Reg.xlsx_RoiSetAuto-8.zip Distance px		4	7
	con_08m_m67_a3_002_Max_ Reg.xlsx_RoiSetAuto-73.zip Distance px	shi_05m_m67_a3_002_Max_ Reg.xlsx_RoiSetAuto-83.zip Distance px		47	25
	con_08m_m67_a3_002_Max_ Reg.xlsx_RoiSetAuto-75.zip Distance px	shi_05m_m67_a3_002_Max_ Reg.xlsx_RoiSetAuto-84.zip Distance px		4	11
	con_08m_m67_a3_002_Max_ Reg.xlsx_RoiSetAuto-8.zip Distance px	shi_05m_m67_a3_002_Max_ Reg.xlsx_RoiSetAuto-85.zip Distance px		13	19
	con_08m_m67_a3_002_Max_ Reg.xlsx_RoiSetAuto-82.zip Distance px	shi_05m_m67_a3_002_Max_ Reg.xlsx_RoiSetAuto-86.zip Distance px		70	32
	con_08m_m67_a3_002_Max_ Reg.xlsx_RoiSetAuto-83.zip Distance px	shi_05m_m67_a3_002_Max_ Reg.xlsx_RoiSetAuto-87.zip Distance px		4	6
	con_08m_m67_a3_002_Max_ Reg.xlsx_RoiSetAuto-84.zip Distance px	shi_05m_m67_a3_002_Max_ Reg.xlsx_RoiSetAuto-88.zip Distance px		5	9
	con_08m_m67_a3_002_Max_ Reg.xlsx_RoiSetAuto-86.zip Distance px	shi_05m_m67_a3_002_Max_ Reg.xlsx_RoiSetAuto-89.zip Distance px		23	8
	con_08m_m67_a3_002_Max_ Reg.xlsx_RoiSetAuto-9.zip Distance px	shi_05m_m67_a3_002_Max_ Reg.xlsx_RoiSetAuto-9.zip Distance px		6	9
	con_08m_m67_a3_002_Max_ Reg.xlsx_RoiSetAuto-91.zip Distance px	shi_05m_m67_a3_002_Max_ Reg.xlsx_RoiSetAuto-91.zip Distance px		6	5
	con_08m_m67_a3_002_Max_ Reg.xlsx_RoiSetAuto-93.zip Distance px	shi_05m_m67_a3_002_Max_ Reg.xlsx_RoiSetAuto-92.zip Distance px		14	4
	con_08m_m67_a3_003_Max_ Reg.xlsx_RoiSetAuto-1.zip Distance px	shi_05m_m67_a3_002_Max_ Reg.xlsx_RoiSetAuto-93.zip Distance px		186	67
	con_08m_m67_a3_003_Max_ Reg.xlsx_RoiSetAuto-10.zip Distance px	shi_05m_m67_a3_002_Max_ Reg.xlsx_RoiSetAuto-94.zip Distance px		14	5
	con_08m_m67_a3_003_Max_ Reg.xlsx_RoiSetAuto-100.zip Distance px	shi_05m_m67_a3_002_Max_ Reg.xlsx_RoiSetAuto-95.zip Distance px		4	4
	con_08m_m67_a3_003_Max_ Reg.xlsx_RoiSetAuto-101.zip Distance px	shi_05m_m67_a3_002_Max_ Reg.xlsx_RoiSetAuto-96.zip Distance px		4	6
	con_08m_m67_a3_003_Max_ Reg.xlsx_RoiSetAuto-102.zip Distance px	shi_05m_m67_a3_002_Max_ Reg.xlsx_RoiSetAuto-97.zip Distance px		8	6
	con_08m_m67_a3_003_Max_ Reg.xlsx_RoiSetAuto-104.zip Distance px	shi_05m_m67_a3_002_Max_ Reg.xlsx_RoiSetAuto-98.zip Distance px		10	10
	con_08m_m67_a3_003_Max_ Reg.xlsx_RoiSetAuto-105.zip Distance px	shi_05m_m67_a3_002_Max_ Reg.xlsx_RoiSetAuto-99.zip Distance px		7	7
	con_08m_m67_a3_003_Max_ Reg.xlsx_RoiSetAuto-106.zip Distance px	shi_05m_m67_a3_003_Max_ Reg.xlsx_RoiSetAuto-10.zip Distance px		19	16
	con_08m_m67_a3_003_Max_ Reg.xlsx_RoiSetAuto-107.zip Distance px	shi_05m_m67_a3_003_Max_ Reg.xlsx_RoiSetAuto-13.zip Distance px		4	6
	con_08m_m67_a3_003_Max_ Reg.xlsx_RoiSetAuto-108.zip Distance px	shi_05m_m67_a3_003_Max_ Reg.xlsx_RoiSetAuto-15.zip Distance px		43	9
	con_08m_m67_a3_003_Max_ Reg.xlsx_RoiSetAuto-109.zip Distance px	shi_05m_m67_a3_003_Max_ Reg.xlsx_RoiSetAuto-16.zip Distance px		8	57
	con_08m_m67_a3_003_Max_ Reg.xlsx_RoiSetAuto-11.zip Distance px	shi_05m_m67_a3_003_Max_ Reg.xlsx_RoiSetAuto-17.zip Distance px		28	6
	con_08m_m67_a3_003_Max_ Reg.xlsx_RoiSetAuto-110.zip Distance px	shi_05m_m67_a3_003_Max_ Reg.xlsx_RoiSetAuto-18.zip Distance px		19	6
	con_08m_m67_a3_003_Max_ Reg.xlsx_RoiSetAuto-111.zip Distance px	shi_05m_m67_a3_003_Max_ Reg.xlsx_RoiSetAuto-2.zip Distance px		6	5
	con_08m_m67_a3_003_Max_ Reg.xlsx_RoiSetAuto-112.zip Distance px	shi_05m_m67_a3_003_Max_ Reg.xlsx_RoiSetAuto-20.zip Distance px		4	5
	con_08m_m67_a3_003_Max_ Reg.xlsx_RoiSetAuto-12.zip Distance px	shi_05m_m67_a3_003_Max_ Reg.xlsx_RoiSetAuto-21.zip Distance px		10	21
	con_08m_m67_a3_003_Max_ Reg.xlsx_RoiSetAuto-13.zip Distance px	shi_05m_m67_a3_003_Max_ Reg.xlsx_RoiSetAuto-22.zip Distance px		5	4
	con_08m_m67_a3_003_Max_ Reg.xlsx_RoiSetAuto-15.zip Distance px	shi_05m_m67_a3_003_Max_ Reg.xlsx_RoiSetAuto-23.zip Distance px		4	7
	con_08m_m67_a3_003_Max_ Reg.xlsx_RoiSetAuto-16.zip Distance px	shi_05m_m67_a3_003_Max_ Reg.xlsx_RoiSetAuto-24.zip Distance px		12	7
	con_08m_m67_a3_003_Max_ Reg.xlsx_RoiSetAuto-17.zip Distance px	shi_05m_m67_a3_003_Max_ Reg.xlsx_RoiSetAuto-25.zip Distance px		5	22
	con_08m_m67_a3_003_Max_ Reg.xlsx_RoiSetAuto-18.zip Distance px	shi_05m_m67_a3_003_Max_ Reg.xlsx_RoiSetAuto-26.zip Distance px		24	4
	con_08m_m67_a3_003_Max_ Reg.xlsx_RoiSetAuto-19.zip Distance px	shi_05m_m67_a3_003_Max_ Reg.xlsx_RoiSetAuto-3.zip Distance px		4	7
	con_08m_m67_a3_003_Max_ Reg.xlsx_RoiSetAuto-2.zip Distance px	shi_05m_m67_a3_003_Max_ Reg.xlsx_RoiSetAuto-4.zip Distance px		76	21
	con_08m_m67_a3_003_Max_ Reg.xlsx_RoiSetAuto-20.zip Distance px	shi_05m_m67_a3_003_Max_ Reg.xlsx_RoiSetAuto-6.zip Distance px		5	5
	con_08m_m67_a3_003_Max_ Reg.xlsx_RoiSetAuto-21.zip Distance px	shi_05m_m67_a3_003_Max_ Reg.xlsx_RoiSetAuto-7.zip Distance px		5	7
	con_08m_m67_a3_003_Max_ Reg.xlsx_RoiSetAuto-22.zip Distance px	shi_05m_m67_a3_003_Max_ Reg.xlsx_RoiSetAuto-8.zip Distance px		7	33
	con_08m_m67_a3_003_Max_ Reg.xlsx_RoiSetAuto-23.zip Distance px	shi_06m_m67_a3_001_Max_ Reg.xlsx_RoiSetAuto-10.zip Distance px		19	13
	con_08m_m67_a3_003_Max_ Reg.xlsx_RoiSetAuto-24.zip Distance px	shi_06m_m67_a3_001_Max_ Reg.xlsx_RoiSetAuto-100.zip Distance px		13	4
	con_08m_m67_a3_003_Max_ Reg.xlsx_RoiSetAuto-26.zip Distance px	shi_06m_m67_a3_001_Max_ Reg.xlsx_RoiSetAuto-101.zip Distance px		5	4
	con_08m_m67_a3_003_Max_ Reg.xlsx_RoiSetAuto-27.zip Distance px	shi_06m_m67_a3_001_Max_ Reg.xlsx_RoiSetAuto-102.zip Distance px		6	4
	con_08m_m67_a3_003_Max_ Reg.xlsx_RoiSetAuto-28.zip Distance px	shi_06m_m67_a3_001_Max_ Reg.xlsx_RoiSetAuto-103.zip Distance px		6	15
	con_08m_m67_a3_003_Max_ Reg.xlsx_RoiSetAuto-3.zip Distance px	shi_06m_m67_a3_001_Max_ Reg.xlsx_RoiSetAuto-104.zip Distance px		4	15
	con_08m_m67_a3_003_Max_ Reg.xlsx_RoiSetAuto-30.zip Distance px	shi_06m_m67_a3_001_Max_ Reg.xlsx_RoiSetAuto-105.zip Distance px		26	5
	con_08m_m67_a3_003_Max_ Reg.xlsx_RoiSetAuto-31.zip Distance px	shi_06m_m67_a3_001_Max_ Reg.xlsx_RoiSetAuto-106.zip Distance px		13	19
	con_08m_m67_a3_003_Max_ Reg.xlsx_RoiSetAuto-32.zip Distance px	shi_06m_m67_a3_001_Max_ Reg.xlsx_RoiSetAuto-107.zip Distance px		43	4
	con_08m_m67_a3_003_Max_ Reg.xlsx_RoiSetAuto-33.zip Distance px	shi_06m_m67_a3_001_Max_ Reg.xlsx_RoiSetAuto-108.zip Distance px		8	5
	con_08m_m67_a3_003_Max_ Reg.xlsx_RoiSetAuto-34.zip Distance px	shi_06m_m67_a3_001_Max_ Reg.xlsx_RoiSetAuto-109.zip Distance px		4	31
	con_08m_m67_a3_003_Max_ Reg.xlsx_RoiSetAuto-35.zip Distance px	shi_06m_m67_a3_001_Max_ Reg.xlsx_RoiSetAuto-11.zip Distance px		56	19
	con_08m_m67_a3_003_Max_ Reg.xlsx_RoiSetAuto-36.zip Distance px	shi_06m_m67_a3_001_Max_ Reg.xlsx_RoiSetAuto-110.zip Distance px		6	13
	con_08m_m67_a3_003_Max_ Reg.xlsx_RoiSetAuto-37.zip Distance px	shi_06m_m67_a3_001_Max_ Reg.xlsx_RoiSetAuto-114.zip Distance px		19	60
	con_08m_m67_a3_003_Max_ Reg.xlsx_RoiSetAuto-38.zip Distance px	shi_06m_m67_a3_001_Max_ Reg.xlsx_RoiSetAuto-115.zip Distance px		4	10
	con_08m_m67_a3_003_Max_ Reg.xlsx_RoiSetAuto-39.zip Distance px	shi_06m_m67_a3_001_Max_ Reg.xlsx_RoiSetAuto-116.zip Distance px		8	5
	con_08m_m67_a3_003_Max_ Reg.xlsx_RoiSetAuto-4.zip Distance px	shi_06m_m67_a3_001_Max_ Reg.xlsx_RoiSetAuto-117.zip Distance px		47	4
	con_08m_m67_a3_003_Max_ Reg.xlsx_RoiSetAuto-40.zip Distance px	shi_06m_m67_a3_001_Max_ Reg.xlsx_RoiSetAuto-118.zip Distance px		8	6
	con_08m_m67_a3_003_Max_ Reg.xlsx_RoiSetAuto-41.zip Distance px	shi_06m_m67_a3_001_Max_ Reg.xlsx_RoiSetAuto-119.zip Distance px		7	5
	con_08m_m67_a3_003_Max_ Reg.xlsx_RoiSetAuto-42.zip Distance px	shi_06m_m67_a3_001_Max_ Reg.xlsx_RoiSetAuto-12.zip Distance px		5	12
	con_08m_m67_a3_003_Max_ Reg.xlsx_RoiSetAuto-43.zip Distance px	shi_06m_m67_a3_001_Max_ Reg.xlsx_RoiSetAuto-120.zip Distance px		7	6
	con_08m_m67_a3_003_Max_ Reg.xlsx_RoiSetAuto-44.zip Distance px	shi_06m_m67_a3_001_Max_ Reg.xlsx_RoiSetAuto-121.zip Distance px		23	4
	con_08m_m67_a3_003_Max_ Reg.xlsx_RoiSetAuto-45.zip Distance px	shi_06m_m67_a3_001_Max_ Reg.xlsx_RoiSetAuto-122.zip Distance px		7	6
	con_08m_m67_a3_003_Max_ Reg.xlsx_RoiSetAuto-46.zip Distance px	shi_06m_m67_a3_001_Max_ Reg.xlsx_RoiSetAuto-124.zip Distance px		6	6
	con_08m_m67_a3_003_Max_ Reg.xlsx_RoiSetAuto-47.zip Distance px	shi_06m_m67_a3_001_Max_ Reg.xlsx_RoiSetAuto-125.zip Distance px		5	26
	con_08m_m67_a3_003_Max_ Reg.xlsx_RoiSetAuto-48.zip Distance px	shi_06m_m67_a3_001_Max_ Reg.xlsx_RoiSetAuto-126.zip Distance px		7	5
	con_08m_m67_a3_003_Max_ Reg.xlsx_RoiSetAuto-49.zip Distance px	shi_06m_m67_a3_001_Max_ Reg.xlsx_RoiSetAuto-127.zip Distance px		5	4
	con_08m_m67_a3_003_Max_ Reg.xlsx_RoiSetAuto-5.zip Distance px	shi_06m_m67_a3_001_Max_ Reg.xlsx_RoiSetAuto-128.zip Distance px		25	4
	con_08m_m67_a3_003_Max_ Reg.xlsx_RoiSetAuto-50.zip Distance px	shi_06m_m67_a3_001_Max_ Reg.xlsx_RoiSetAuto-13.zip Distance px		33	19
	con_08m_m67_a3_003_Max_ Reg.xlsx_RoiSetAuto-51.zip Distance px	shi_06m_m67_a3_001_Max_ Reg.xlsx_RoiSetAuto-14.zip Distance px		6	23
	con_08m_m67_a3_003_Max_ Reg.xlsx_RoiSetAuto-52.zip Distance px	shi_06m_m67_a3_001_Max_ Reg.xlsx_RoiSetAuto-15.zip Distance px		36	5
	con_08m_m67_a3_003_Max_ Reg.xlsx_RoiSetAuto-53.zip Distance px	shi_06m_m67_a3_001_Max_ Reg.xlsx_RoiSetAuto-16.zip Distance px		16	9
	con_08m_m67_a3_003_Max_ Reg.xlsx_RoiSetAuto-54.zip Distance px	shi_06m_m67_a3_001_Max_ Reg.xlsx_RoiSetAuto-17.zip Distance px		4	18
	con_08m_m67_a3_003_Max_ Reg.xlsx_RoiSetAuto-55.zip Distance px	shi_06m_m67_a3_001_Max_ Reg.xlsx_RoiSetAuto-18.zip Distance px		50	5
	con_08m_m67_a3_003_Max_ Reg.xlsx_RoiSetAuto-56.zip Distance px	shi_06m_m67_a3_001_Max_ Reg.xlsx_RoiSetAuto-2.zip Distance px		4	28
	con_08m_m67_a3_003_Max_ Reg.xlsx_RoiSetAuto-57.zip Distance px	shi_06m_m67_a3_001_Max_ Reg.xlsx_RoiSetAuto-21.zip Distance px		67	7
	con_08m_m67_a3_003_Max_ Reg.xlsx_RoiSetAuto-58.zip Distance px	shi_06m_m67_a3_001_Max_ Reg.xlsx_RoiSetAuto-22.zip Distance px		5	29
	con_08m_m67_a3_003_Max_ Reg.xlsx_RoiSetAuto-59.zip Distance px	shi_06m_m67_a3_001_Max_ Reg.xlsx_RoiSetAuto-23.zip Distance px		5	30
	con_08m_m67_a3_003_Max_ Reg.xlsx_RoiSetAuto-6.zip Distance px	shi_06m_m67_a3_001_Max_ Reg.xlsx_RoiSetAuto-24.zip Distance px		48	14
	con_08m_m67_a3_003_Max_ Reg.xlsx_RoiSetAuto-60.zip Distance px	shi_06m_m67_a3_001_Max_ Reg.xlsx_RoiSetAuto-25.zip Distance px		5	6
	con_08m_m67_a3_003_Max_ Reg.xlsx_RoiSetAuto-61.zip Distance px	shi_06m_m67_a3_001_Max_ Reg.xlsx_RoiSetAuto-26.zip Distance px		4	28
	con_08m_m67_a3_003_Max_ Reg.xlsx_RoiSetAuto-62.zip Distance px	shi_06m_m67_a3_001_Max_ Reg.xlsx_RoiSetAuto-27.zip Distance px		4	68
	con_08m_m67_a3_003_Max_ Reg.xlsx_RoiSetAuto-63.zip Distance px	shi_06m_m67_a3_001_Max_ Reg.xlsx_RoiSetAuto-28.zip Distance px		6	4
	con_08m_m67_a3_003_Max_ Reg.xlsx_RoiSetAuto-64.zip Distance px	shi_06m_m67_a3_001_Max_ Reg.xlsx_RoiSetAuto-29.zip Distance px		4	11
	con_08m_m67_a3_003_Max_ Reg.xlsx_RoiSetAuto-65.zip Distance px	shi_06m_m67_a3_001_Max_ Reg.xlsx_RoiSetAuto-3.zip Distance px		5	22
	con_08m_m67_a3_003_Max_ Reg.xlsx_RoiSetAuto-66.zip Distance px	shi_06m_m67_a3_001_Max_ Reg.xlsx_RoiSetAuto-30.zip Distance px		12	12
	con_08m_m67_a3_003_Max_ Reg.xlsx_RoiSetAuto-67.zip Distance px	shi_06m_m67_a3_001_Max_ Reg.xlsx_RoiSetAuto-31.zip Distance px		6	7
	con_08m_m67_a3_003_Max_ Reg.xlsx_RoiSetAuto-68.zip Distance px	shi_06m_m67_a3_001_Max_ Reg.xlsx_RoiSetAuto-32.zip Distance px		5	6
	con_08m_m67_a3_003_Max_ Reg.xlsx_RoiSetAuto-69.zip Distance px	shi_06m_m67_a3_001_Max_ Reg.xlsx_RoiSetAuto-33.zip Distance px		5	6
	con_08m_m67_a3_003_Max_ Reg.xlsx_RoiSetAuto-7.zip Distance px	shi_06m_m67_a3_001_Max_ Reg.xlsx_RoiSetAuto-34.zip Distance px		27	20
	con_08m_m67_a3_003_Max_ Reg.xlsx_RoiSetAuto-70.zip Distance px	shi_06m_m67_a3_001_Max_ Reg.xlsx_RoiSetAuto-35.zip Distance px		6	19
	con_08m_m67_a3_003_Max_ Reg.xlsx_RoiSetAuto-71.zip Distance px	shi_06m_m67_a3_001_Max_ Reg.xlsx_RoiSetAuto-36.zip Distance px		20	6
	con_08m_m67_a3_003_Max_ Reg.xlsx_RoiSetAuto-73.zip Distance px	shi_06m_m67_a3_001_Max_ Reg.xlsx_RoiSetAuto-37.zip Distance px		11	8
	con_08m_m67_a3_003_Max_ Reg.xlsx_RoiSetAuto-74.zip Distance px	shi_06m_m67_a3_001_Max_ Reg.xlsx_RoiSetAuto-38.zip Distance px		12	5
	con_08m_m67_a3_003_Max_ Reg.xlsx_RoiSetAuto-75.zip Distance px	shi_06m_m67_a3_001_Max_ Reg.xlsx_RoiSetAuto-4.zip Distance px		4	7
	con_08m_m67_a3_003_Max_ Reg.xlsx_RoiSetAuto-76.zip Distance px	shi_06m_m67_a3_001_Max_ Reg.xlsx_RoiSetAuto-40.zip Distance px		21	16
	con_08m_m67_a3_003_Max_ Reg.xlsx_RoiSetAuto-77.zip Distance px	shi_06m_m67_a3_001_Max_ Reg.xlsx_RoiSetAuto-42.zip Distance px		4	5
	con_08m_m67_a3_003_Max_ Reg.xlsx_RoiSetAuto-78.zip Distance px	shi_06m_m67_a3_001_Max_ Reg.xlsx_RoiSetAuto-45.zip Distance px		23	14
	con_08m_m67_a3_003_Max_ Reg.xlsx_RoiSetAuto-79.zip Distance px	shi_06m_m67_a3_001_Max_ Reg.xlsx_RoiSetAuto-46.zip Distance px		6	19
	con_08m_m67_a3_003_Max_ Reg.xlsx_RoiSetAuto-8.zip Distance px	shi_06m_m67_a3_001_Max_ Reg.xlsx_RoiSetAuto-48.zip Distance px		10	4
	con_08m_m67_a3_003_Max_ Reg.xlsx_RoiSetAuto-80.zip Distance px	shi_06m_m67_a3_001_Max_ Reg.xlsx_RoiSetAuto-49.zip Distance px		5	4
	con_08m_m67_a3_003_Max_ Reg.xlsx_RoiSetAuto-81.zip Distance px	shi_06m_m67_a3_001_Max_ Reg.xlsx_RoiSetAuto-50.zip Distance px		6	6
	con_08m_m67_a3_003_Max_ Reg.xlsx_RoiSetAuto-82.zip Distance px	shi_06m_m67_a3_001_Max_ Reg.xlsx_RoiSetAuto-51.zip Distance px		6	5
	con_08m_m67_a3_003_Max_ Reg.xlsx_RoiSetAuto-83.zip Distance px	shi_06m_m67_a3_001_Max_ Reg.xlsx_RoiSetAuto-52.zip Distance px		7	10
	con_08m_m67_a3_003_Max_ Reg.xlsx_RoiSetAuto-84.zip Distance px	shi_06m_m67_a3_001_Max_ Reg.xlsx_RoiSetAuto-53.zip Distance px		7	9
	con_08m_m67_a3_003_Max_ Reg.xlsx_RoiSetAuto-85.zip Distance px	shi_06m_m67_a3_001_Max_ Reg.xlsx_RoiSetAuto-54.zip Distance px		4	6
	con_08m_m67_a3_003_Max_ Reg.xlsx_RoiSetAuto-86.zip Distance px	shi_06m_m67_a3_001_Max_ Reg.xlsx_RoiSetAuto-56.zip Distance px		4	30
	con_08m_m67_a3_003_Max_ Reg.xlsx_RoiSetAuto-87.zip Distance px	shi_06m_m67_a3_001_Max_ Reg.xlsx_RoiSetAuto-57.zip Distance px		4	4
	con_08m_m67_a3_003_Max_ Reg.xlsx_RoiSetAuto-88.zip Distance px	shi_06m_m67_a3_001_Max_ Reg.xlsx_RoiSetAuto-58.zip Distance px		11	15
	con_08m_m67_a3_003_Max_ Reg.xlsx_RoiSetAuto-89.zip Distance px	shi_06m_m67_a3_001_Max_ Reg.xlsx_RoiSetAuto-59.zip Distance px		15	4
	con_08m_m67_a3_003_Max_ Reg.xlsx_RoiSetAuto-9.zip Distance px	shi_06m_m67_a3_001_Max_ Reg.xlsx_RoiSetAuto-60.zip Distance px		16	5
	con_08m_m67_a3_003_Max_ Reg.xlsx_RoiSetAuto-90.zip Distance px	shi_06m_m67_a3_001_Max_ Reg.xlsx_RoiSetAuto-61.zip Distance px		12	12
	con_08m_m67_a3_003_Max_ Reg.xlsx_RoiSetAuto-91.zip Distance px	shi_06m_m67_a3_001_Max_ Reg.xlsx_RoiSetAuto-62.zip Distance px		4	20
	con_08m_m67_a3_003_Max_ Reg.xlsx_RoiSetAuto-92.zip Distance px	shi_06m_m67_a3_001_Max_ Reg.xlsx_RoiSetAuto-64.zip Distance px		7	7
	con_08m_m67_a3_003_Max_ Reg.xlsx_RoiSetAuto-93.zip Distance px	shi_06m_m67_a3_001_Max_ Reg.xlsx_RoiSetAuto-65.zip Distance px		4	8
	con_08m_m67_a3_003_Max_ Reg.xlsx_RoiSetAuto-94.zip Distance px	shi_06m_m67_a3_001_Max_ Reg.xlsx_RoiSetAuto-66.zip Distance px		4	4
	con_08m_m67_a3_003_Max_ Reg.xlsx_RoiSetAuto-95.zip Distance px	shi_06m_m67_a3_001_Max_ Reg.xlsx_RoiSetAuto-68.zip Distance px		6	4
	con_08m_m67_a3_003_Max_ Reg.xlsx_RoiSetAuto-96.zip Distance px	shi_06m_m67_a3_001_Max_ Reg.xlsx_RoiSetAuto-69.zip Distance px		8	5
	con_08m_m67_a3_003_Max_ Reg.xlsx_RoiSetAuto-97.zip Distance px	shi_06m_m67_a3_001_Max_ Reg.xlsx_RoiSetAuto-7.zip Distance px		4	13
	con_08m_m67_a3_003_Max_ Reg.xlsx_RoiSetAuto-98.zip Distance px	shi_06m_m67_a3_001_Max_ Reg.xlsx_RoiSetAuto-70.zip Distance px		5	4
	con_08m_m67_a3_003_Max_ Reg.xlsx_RoiSetAuto-99.zip Distance px	shi_06m_m67_a3_001_Max_ Reg.xlsx_RoiSetAuto-71.zip Distance px		7	5
		shi_06m_m67_a3_001_Max_ Reg.xlsx_RoiSetAuto-72.zip Distance px			6
		shi_06m_m67_a3_001_Max_ Reg.xlsx_RoiSetAuto-73.zip Distance px			17
		shi_06m_m67_a3_001_Max_ Reg.xlsx_RoiSetAuto-74.zip Distance px			5
		shi_06m_m67_a3_001_Max_ Reg.xlsx_RoiSetAuto-75.zip Distance px			7
		shi_06m_m67_a3_001_Max_ Reg.xlsx_RoiSetAuto-77.zip Distance px			5
		shi_06m_m67_a3_001_Max_ Reg.xlsx_RoiSetAuto-78.zip Distance px			9
		shi_06m_m67_a3_001_Max_ Reg.xlsx_RoiSetAuto-79.zip Distance px			4
		shi_06m_m67_a3_001_Max_ Reg.xlsx_RoiSetAuto-8.zip Distance px			13
		shi_06m_m67_a3_001_Max_ Reg.xlsx_RoiSetAuto-80.zip Distance px			5
		shi_06m_m67_a3_001_Max_ Reg.xlsx_RoiSetAuto-82.zip Distance px			6
		shi_06m_m67_a3_001_Max_ Reg.xlsx_RoiSetAuto-83.zip Distance px			4
		shi_06m_m67_a3_001_Max_ Reg.xlsx_RoiSetAuto-84.zip Distance px			10
		shi_06m_m67_a3_001_Max_ Reg.xlsx_RoiSetAuto-85.zip Distance px			4
		shi_06m_m67_a3_001_Max_ Reg.xlsx_RoiSetAuto-88.zip Distance px			9
		shi_06m_m67_a3_001_Max_ Reg.xlsx_RoiSetAuto-89.zip Distance px			9
		shi_06m_m67_a3_001_Max_ Reg.xlsx_RoiSetAuto-9.zip Distance px			6
		shi_06m_m67_a3_001_Max_ Reg.xlsx_RoiSetAuto-91.zip Distance px			11
		shi_06m_m67_a3_001_Max_ Reg.xlsx_RoiSetAuto-92.zip Distance px			25
		shi_06m_m67_a3_001_Max_ Reg.xlsx_RoiSetAuto-93.zip Distance px			6
		shi_06m_m67_a3_001_Max_ Reg.xlsx_RoiSetAuto-95.zip Distance px			4
		shi_06m_m67_a3_001_Max_ Reg.xlsx_RoiSetAuto-96.zip Distance px			14
		shi_06m_m67_a3_001_Max_ Reg.xlsx_RoiSetAuto-97.zip Distance px			6
		shi_06m_m67_a3_001_Max_ Reg.xlsx_RoiSetAuto-98.zip Distance px			6
		shi_06m_m67_a3_001_Max_ Reg.xlsx_RoiSetAuto-99.zip Distance px			4
		shi_06m_m67_a3_002_Max_ Reg.xlsx_RoiSetAuto-10.zip Distance px			4
		shi_06m_m67_a3_002_Max_ Reg.xlsx_RoiSetAuto-11.zip Distance px			9
		shi_06m_m67_a3_002_Max_ Reg.xlsx_RoiSetAuto-13.zip Distance px			15
		shi_06m_m67_a3_002_Max_ Reg.xlsx_RoiSetAuto-14.zip Distance px			14
		shi_06m_m67_a3_002_Max_ Reg.xlsx_RoiSetAuto-15.zip Distance px			12
		shi_06m_m67_a3_002_Max_ Reg.xlsx_RoiSetAuto-16.zip Distance px			14
		shi_06m_m67_a3_002_Max_ Reg.xlsx_RoiSetAuto-17.zip Distance px			14
		shi_06m_m67_a3_002_Max_ Reg.xlsx_RoiSetAuto-2.zip Distance px			63
		shi_06m_m67_a3_002_Max_ Reg.xlsx_RoiSetAuto-20.zip Distance px			4
		shi_06m_m67_a3_002_Max_ Reg.xlsx_RoiSetAuto-21.zip Distance px			18
		shi_06m_m67_a3_002_Max_ Reg.xlsx_RoiSetAuto-22.zip Distance px			7
		shi_06m_m67_a3_002_Max_ Reg.xlsx_RoiSetAuto-23.zip Distance px			5
		shi_06m_m67_a3_002_Max_ Reg.xlsx_RoiSetAuto-25.zip Distance px			4
		shi_06m_m67_a3_002_Max_ Reg.xlsx_RoiSetAuto-27.zip Distance px			10
		shi_06m_m67_a3_002_Max_ Reg.xlsx_RoiSetAuto-28.zip Distance px			4
		shi_06m_m67_a3_002_Max_ Reg.xlsx_RoiSetAuto-3.zip Distance px			11
		shi_06m_m67_a3_002_Max_ Reg.xlsx_RoiSetAuto-30.zip Distance px			5
		shi_06m_m67_a3_002_Max_ Reg.xlsx_RoiSetAuto-31.zip Distance px			4
		shi_06m_m67_a3_002_Max_ Reg.xlsx_RoiSetAuto-32.zip Distance px			10
		shi_06m_m67_a3_002_Max_ Reg.xlsx_RoiSetAuto-33.zip Distance px			8
		shi_06m_m67_a3_002_Max_ Reg.xlsx_RoiSetAuto-34.zip Distance px			8
		shi_06m_m67_a3_002_Max_ Reg.xlsx_RoiSetAuto-35.zip Distance px			5
		shi_06m_m67_a3_002_Max_ Reg.xlsx_RoiSetAuto-36.zip Distance px			8
		shi_06m_m67_a3_002_Max_ Reg.xlsx_RoiSetAuto-39.zip Distance px			4
		shi_06m_m67_a3_002_Max_ Reg.xlsx_RoiSetAuto-4.zip Distance px			57
		shi_06m_m67_a3_002_Max_ Reg.xlsx_RoiSetAuto-41.zip Distance px			5
		shi_06m_m67_a3_002_Max_ Reg.xlsx_RoiSetAuto-43.zip Distance px			11
		shi_06m_m67_a3_002_Max_ Reg.xlsx_RoiSetAuto-44.zip Distance px			4
		shi_06m_m67_a3_002_Max_ Reg.xlsx_RoiSetAuto-45.zip Distance px			4
		shi_06m_m67_a3_002_Max_ Reg.xlsx_RoiSetAuto-46.zip Distance px			4
		shi_06m_m67_a3_002_Max_ Reg.xlsx_RoiSetAuto-48.zip Distance px			4
		shi_06m_m67_a3_002_Max_ Reg.xlsx_RoiSetAuto-49.zip Distance px			4
		shi_06m_m67_a3_002_Max_ Reg.xlsx_RoiSetAuto-50.zip Distance px			18
		shi_06m_m67_a3_002_Max_ Reg.xlsx_RoiSetAuto-51.zip Distance px			4
		shi_06m_m67_a3_002_Max_ Reg.xlsx_RoiSetAuto-55.zip Distance px			4
		shi_06m_m67_a3_002_Max_ Reg.xlsx_RoiSetAuto-56.zip Distance px			9
		shi_06m_m67_a3_002_Max_ Reg.xlsx_RoiSetAuto-58.zip Distance px			9
		shi_06m_m67_a3_002_Max_ Reg.xlsx_RoiSetAuto-6.zip Distance px			31
		shi_06m_m67_a3_002_Max_ Reg.xlsx_RoiSetAuto-60.zip Distance px			6
		shi_06m_m67_a3_002_Max_ Reg.xlsx_RoiSetAuto-61.zip Distance px			7
		shi_06m_m67_a3_002_Max_ Reg.xlsx_RoiSetAuto-62.zip Distance px			21
		shi_06m_m67_a3_002_Max_ Reg.xlsx_RoiSetAuto-63.zip Distance px			15
		shi_06m_m67_a3_002_Max_ Reg.xlsx_RoiSetAuto-66.zip Distance px			4
		shi_06m_m67_a3_002_Max_ Reg.xlsx_RoiSetAuto-69.zip Distance px			7
		shi_06m_m67_a3_002_Max_ Reg.xlsx_RoiSetAuto-7.zip Distance px			14
		shi_06m_m67_a3_002_Max_ Reg.xlsx_RoiSetAuto-70.zip Distance px			4
		shi_06m_m67_a3_002_Max_ Reg.xlsx_RoiSetAuto-71.zip Distance px			26
		shi_06m_m67_a3_002_Max_ Reg.xlsx_RoiSetAuto-72.zip Distance px			6
		shi_06m_m67_a3_002_Max_ Reg.xlsx_RoiSetAuto-73.zip Distance px			14
		shi_06m_m67_a3_002_Max_ Reg.xlsx_RoiSetAuto-74.zip Distance px			8
		shi_06m_m67_a3_002_Max_ Reg.xlsx_RoiSetAuto-76.zip Distance px			6
		shi_06m_m67_a3_002_Max_ Reg.xlsx_RoiSetAuto-79.zip Distance px			7
		shi_06m_m67_a3_002_Max_ Reg.xlsx_RoiSetAuto-8.zip Distance px			28
		shi_06m_m67_a3_002_Max_ Reg.xlsx_RoiSetAuto-80.zip Distance px			4
		shi_06m_m67_a3_002_Max_ Reg.xlsx_RoiSetAuto-81.zip Distance px			5
		shi_06m_m67_a3_002_Max_ Reg.xlsx_RoiSetAuto-82.zip Distance px			5
		shi_06m_m67_a3_002_Max_ Reg.xlsx_RoiSetAuto-83.zip Distance px			4
		shi_06m_m67_a3_002_Max_ Reg.xlsx_RoiSetAuto-84.zip Distance px			4
		shi_06m_m67_a3_002_Max_ Reg.xlsx_RoiSetAuto-85.zip Distance px			5
		shi_06m_m67_a3_002_Max_ Reg.xlsx_RoiSetAuto-86.zip Distance px			7
		shi_06m_m67_a3_002_Max_ Reg.xlsx_RoiSetAuto-89.zip Distance px			5
		shi_06m_m67_a3_002_Max_ Reg.xlsx_RoiSetAuto-90.zip Distance px			4
		shi_06m_m67_a3_002_Max_ Reg.xlsx_RoiSetAuto-91.zip Distance px			5
		shi_06m_m67_a3_002_Max_ Reg.xlsx_RoiSetAuto-93.zip Distance px			6
		shi_06m_m67_a3_002_Max_ Reg.xlsx_RoiSetAuto-94.zip Distance px			4
		shi_06m_m67_a3_003_Max_ Reg.xlsx_RoiSetAuto-1.zip Distance px			49
		shi_06m_m67_a3_003_Max_ Reg.xlsx_RoiSetAuto-11.zip Distance px			4
		shi_06m_m67_a3_003_Max_ Reg.xlsx_RoiSetAuto-14.zip Distance px			6
		shi_06m_m67_a3_003_Max_ Reg.xlsx_RoiSetAuto-17.zip Distance px			11
		shi_06m_m67_a3_003_Max_ Reg.xlsx_RoiSetAuto-18.zip Distance px			5
		shi_06m_m67_a3_003_Max_ Reg.xlsx_RoiSetAuto-19.zip Distance px			4
		shi_06m_m67_a3_003_Max_ Reg.xlsx_RoiSetAuto-2.zip Distance px			6
		shi_06m_m67_a3_003_Max_ Reg.xlsx_RoiSetAuto-20.zip Distance px			7
		shi_06m_m67_a3_003_Max_ Reg.xlsx_RoiSetAuto-21.zip Distance px			4
		shi_06m_m67_a3_003_Max_ Reg.xlsx_RoiSetAuto-24.zip Distance px			5
		shi_06m_m67_a3_003_Max_ Reg.xlsx_RoiSetAuto-29.zip Distance px			7
		shi_06m_m67_a3_003_Max_ Reg.xlsx_RoiSetAuto-3.zip Distance px			4
		shi_06m_m67_a3_003_Max_ Reg.xlsx_RoiSetAuto-30.zip Distance px			4
		shi_06m_m67_a3_003_Max_ Reg.xlsx_RoiSetAuto-32.zip Distance px			5
		shi_06m_m67_a3_003_Max_ Reg.xlsx_RoiSetAuto-33.zip Distance px			13
		shi_06m_m67_a3_003_Max_ Reg.xlsx_RoiSetAuto-35.zip Distance px			5
		shi_06m_m67_a3_003_Max_ Reg.xlsx_RoiSetAuto-37.zip Distance px			5
		shi_06m_m67_a3_003_Max_ Reg.xlsx_RoiSetAuto-38.zip Distance px			13
		shi_06m_m67_a3_003_Max_ Reg.xlsx_RoiSetAuto-39.zip Distance px			4
		shi_06m_m67_a3_003_Max_ Reg.xlsx_RoiSetAuto-41.zip Distance px			6
		shi_06m_m67_a3_003_Max_ Reg.xlsx_RoiSetAuto-42.zip Distance px			9
		shi_06m_m67_a3_003_Max_ Reg.xlsx_RoiSetAuto-43.zip Distance px			6
		shi_06m_m67_a3_003_Max_ Reg.xlsx_RoiSetAuto-44.zip Distance px			5
		shi_06m_m67_a3_003_Max_ Reg.xlsx_RoiSetAuto-45.zip Distance px			7
		shi_06m_m67_a3_003_Max_ Reg.xlsx_RoiSetAuto-46.zip Distance px			8
		shi_06m_m67_a3_003_Max_ Reg.xlsx_RoiSetAuto-47.zip Distance px			36
		shi_06m_m67_a3_003_Max_ Reg.xlsx_RoiSetAuto-48.zip Distance px			5
		shi_06m_m67_a3_003_Max_ Reg.xlsx_RoiSetAuto-5.zip Distance px			7
		shi_06m_m67_a3_003_Max_ Reg.xlsx_RoiSetAuto-50.zip Distance px			18
		shi_06m_m67_a3_003_Max_ Reg.xlsx_RoiSetAuto-51.zip Distance px			4
		shi_06m_m67_a3_003_Max_ Reg.xlsx_RoiSetAuto-52.zip Distance px			8
		shi_06m_m67_a3_003_Max_ Reg.xlsx_RoiSetAuto-55.zip Distance px			15
		shi_06m_m67_a3_003_Max_ Reg.xlsx_RoiSetAuto-56.zip Distance px			13
		shi_06m_m67_a3_003_Max_ Reg.xlsx_RoiSetAuto-57.zip Distance px			4
		shi_06m_m67_a3_003_Max_ Reg.xlsx_RoiSetAuto-58.zip Distance px			5
		shi_06m_m67_a3_003_Max_ Reg.xlsx_RoiSetAuto-59.zip Distance px			32
		shi_06m_m67_a3_003_Max_ Reg.xlsx_RoiSetAuto-6.zip Distance px			8
		shi_06m_m67_a3_003_Max_ Reg.xlsx_RoiSetAuto-60.zip Distance px			4
		shi_06m_m67_a3_003_Max_ Reg.xlsx_RoiSetAuto-61.zip Distance px			25
		shi_06m_m67_a3_003_Max_ Reg.xlsx_RoiSetAuto-62.zip Distance px			4
		shi_06m_m67_a3_003_Max_ Reg.xlsx_RoiSetAuto-63.zip Distance px			7
		shi_06m_m67_a3_003_Max_ Reg.xlsx_RoiSetAuto-64.zip Distance px			4
		shi_06m_m67_a3_003_Max_ Reg.xlsx_RoiSetAuto-65.zip Distance px			6
		shi_06m_m67_a3_003_Max_ Reg.xlsx_RoiSetAuto-66.zip Distance px			33
		shi_06m_m67_a3_003_Max_ Reg.xlsx_RoiSetAuto-67.zip Distance px			15
		shi_06m_m67_a3_003_Max_ Reg.xlsx_RoiSetAuto-68.zip Distance px			10
		shi_06m_m67_a3_003_Max_ Reg.xlsx_RoiSetAuto-69.zip Distance px			13
		shi_06m_m67_a3_003_Max_ Reg.xlsx_RoiSetAuto-7.zip Distance px			5
		shi_06m_m67_a3_003_Max_ Reg.xlsx_RoiSetAuto-70.zip Distance px			6
		shi_06m_m67_a3_003_Max_ Reg.xlsx_RoiSetAuto-71.zip Distance px			4
		shi_06m_m67_a3_003_Max_ Reg.xlsx_RoiSetAuto-73.zip Distance px			5
		shi_06m_m67_a3_003_Max_ Reg.xlsx_RoiSetAuto-74.zip Distance px			5
		shi_06m_m67_a3_003_Max_ Reg.xlsx_RoiSetAuto-76.zip Distance px			8
		shi_06m_m67_a3_003_Max_ Reg.xlsx_RoiSetAuto-77.zip Distance px			10
		shi_06m_m67_a3_003_Max_ Reg.xlsx_RoiSetAuto-78.zip Distance px			31
		shi_06m_m67_a3_003_Max_ Reg.xlsx_RoiSetAuto-8.zip Distance px			19
		shi_06m_m67_a3_003_Max_ Reg.xlsx_RoiSetAuto-80.zip Distance px			4
		shi_06m_m67_a3_003_Max_ Reg.xlsx_RoiSetAuto-82.zip Distance px			54
		shi_06m_m67_a3_003_Max_ Reg.xlsx_RoiSetAuto-84.zip Distance px			7
		shi_06m_m67_a3_003_Max_ Reg.xlsx_RoiSetAuto-85.zip Distance px			9
		shi_06m_m67_a3_003_Max_ Reg.xlsx_RoiSetAuto-86.zip Distance px			32
		shi_06m_m67_a3_003_Max_ Reg.xlsx_RoiSetAuto-87.zip Distance px			5
		shi_06m_m67_a3_003_Max_ Reg.xlsx_RoiSetAuto-88.zip Distance px			8
		shi_06m_m67_a3_003_Max_ Reg.xlsx_RoiSetAuto-89.zip Distance px			11
		shi_06m_m67_a3_003_Max_ Reg.xlsx_RoiSetAuto-9.zip Distance px			99
		shi_06m_m67_a3_003_Max_ Reg.xlsx_RoiSetAuto-90.zip Distance px			4
		shi_06m_m67_a3_003_Max_ Reg.xlsx_RoiSetAuto-91.zip Distance px			6
		shi_07m_m67_a3_001_Max_ Reg.xlsx_RoiSetAuto-10.zip Distance px			27
		shi_07m_m67_a3_001_Max_ Reg.xlsx_RoiSetAuto-11.zip Distance px			5
		shi_07m_m67_a3_001_Max_ Reg.xlsx_RoiSetAuto-12.zip Distance px			7
		shi_07m_m67_a3_001_Max_ Reg.xlsx_RoiSetAuto-13.zip Distance px			26
		shi_07m_m67_a3_001_Max_ Reg.xlsx_RoiSetAuto-14.zip Distance px			11
		shi_07m_m67_a3_001_Max_ Reg.xlsx_RoiSetAuto-15.zip Distance px			6
		shi_07m_m67_a3_001_Max_ Reg.xlsx_RoiSetAuto-16.zip Distance px			5
		shi_07m_m67_a3_001_Max_ Reg.xlsx_RoiSetAuto-17.zip Distance px			5
		shi_07m_m67_a3_001_Max_ Reg.xlsx_RoiSetAuto-18.zip Distance px			16
		shi_07m_m67_a3_001_Max_ Reg.xlsx_RoiSetAuto-19.zip Distance px			4
		shi_07m_m67_a3_001_Max_ Reg.xlsx_RoiSetAuto-2.zip Distance px			4
		shi_07m_m67_a3_001_Max_ Reg.xlsx_RoiSetAuto-20.zip Distance px			6
		shi_07m_m67_a3_001_Max_ Reg.xlsx_RoiSetAuto-21.zip Distance px			9
		shi_07m_m67_a3_001_Max_ Reg.xlsx_RoiSetAuto-22.zip Distance px			12
		shi_07m_m67_a3_001_Max_ Reg.xlsx_RoiSetAuto-23.zip Distance px			5
		shi_07m_m67_a3_001_Max_ Reg.xlsx_RoiSetAuto-24.zip Distance px			4
		shi_07m_m67_a3_001_Max_ Reg.xlsx_RoiSetAuto-25.zip Distance px			30
		shi_07m_m67_a3_001_Max_ Reg.xlsx_RoiSetAuto-26.zip Distance px			33
		shi_07m_m67_a3_001_Max_ Reg.xlsx_RoiSetAuto-27.zip Distance px			12
		shi_07m_m67_a3_001_Max_ Reg.xlsx_RoiSetAuto-3.zip Distance px			33
		shi_07m_m67_a3_001_Max_ Reg.xlsx_RoiSetAuto-30.zip Distance px			8
		shi_07m_m67_a3_001_Max_ Reg.xlsx_RoiSetAuto-31.zip Distance px			74
		shi_07m_m67_a3_001_Max_ Reg.xlsx_RoiSetAuto-32.zip Distance px			23
		shi_07m_m67_a3_001_Max_ Reg.xlsx_RoiSetAuto-33.zip Distance px			42
		shi_07m_m67_a3_001_Max_ Reg.xlsx_RoiSetAuto-35.zip Distance px			43
		shi_07m_m67_a3_001_Max_ Reg.xlsx_RoiSetAuto-36.zip Distance px			4
		shi_07m_m67_a3_001_Max_ Reg.xlsx_RoiSetAuto-37.zip Distance px			14
		shi_07m_m67_a3_001_Max_ Reg.xlsx_RoiSetAuto-38.zip Distance px			4
		shi_07m_m67_a3_001_Max_ Reg.xlsx_RoiSetAuto-39.zip Distance px			21
		shi_07m_m67_a3_001_Max_ Reg.xlsx_RoiSetAuto-4.zip Distance px			20
		shi_07m_m67_a3_001_Max_ Reg.xlsx_RoiSetAuto-42.zip Distance px			4
		shi_07m_m67_a3_001_Max_ Reg.xlsx_RoiSetAuto-43.zip Distance px			5
		shi_07m_m67_a3_001_Max_ Reg.xlsx_RoiSetAuto-44.zip Distance px			9
		shi_07m_m67_a3_001_Max_ Reg.xlsx_RoiSetAuto-45.zip Distance px			17
		shi_07m_m67_a3_001_Max_ Reg.xlsx_RoiSetAuto-46.zip Distance px			10
		shi_07m_m67_a3_001_Max_ Reg.xlsx_RoiSetAuto-47.zip Distance px			10
		shi_07m_m67_a3_001_Max_ Reg.xlsx_RoiSetAuto-48.zip Distance px			7
		shi_07m_m67_a3_001_Max_ Reg.xlsx_RoiSetAuto-49.zip Distance px			6
		shi_07m_m67_a3_001_Max_ Reg.xlsx_RoiSetAuto-5.zip Distance px			13
		shi_07m_m67_a3_001_Max_ Reg.xlsx_RoiSetAuto-50.zip Distance px			10
		shi_07m_m67_a3_001_Max_ Reg.xlsx_RoiSetAuto-51.zip Distance px			8
		shi_07m_m67_a3_001_Max_ Reg.xlsx_RoiSetAuto-52.zip Distance px			9
		shi_07m_m67_a3_001_Max_ Reg.xlsx_RoiSetAuto-53.zip Distance px			5
		shi_07m_m67_a3_001_Max_ Reg.xlsx_RoiSetAuto-54.zip Distance px			4
		shi_07m_m67_a3_001_Max_ Reg.xlsx_RoiSetAuto-55.zip Distance px			4
		shi_07m_m67_a3_001_Max_ Reg.xlsx_RoiSetAuto-56.zip Distance px			5
		shi_07m_m67_a3_001_Max_ Reg.xlsx_RoiSetAuto-57.zip Distance px			12
		shi_07m_m67_a3_001_Max_ Reg.xlsx_RoiSetAuto-58.zip Distance px			6
		shi_07m_m67_a3_001_Max_ Reg.xlsx_RoiSetAuto-59.zip Distance px			5
		shi_07m_m67_a3_001_Max_ Reg.xlsx_RoiSetAuto-6.zip Distance px			19
		shi_07m_m67_a3_001_Max_ Reg.xlsx_RoiSetAuto-7.zip Distance px			4
		shi_07m_m67_a3_001_Max_ Reg.xlsx_RoiSetAuto-8.zip Distance px			6
		shi_07m_m67_a3_001_Max_ Reg.xlsx_RoiSetAuto-9.zip Distance px			16
		shi_07m_m67_a3_002_Max_ Reg.xlsx_RoiSetAuto-11.zip Distance px			7
		shi_07m_m67_a3_002_Max_ Reg.xlsx_RoiSetAuto-13.zip Distance px			30
		shi_07m_m67_a3_002_Max_ Reg.xlsx_RoiSetAuto-15.zip Distance px			11
		shi_07m_m67_a3_002_Max_ Reg.xlsx_RoiSetAuto-16.zip Distance px			5
		shi_07m_m67_a3_002_Max_ Reg.xlsx_RoiSetAuto-17.zip Distance px			14
		shi_07m_m67_a3_002_Max_ Reg.xlsx_RoiSetAuto-18.zip Distance px			4
		shi_07m_m67_a3_002_Max_ Reg.xlsx_RoiSetAuto-19.zip Distance px			6
		shi_07m_m67_a3_002_Max_ Reg.xlsx_RoiSetAuto-2.zip Distance px			37
		shi_07m_m67_a3_002_Max_ Reg.xlsx_RoiSetAuto-20.zip Distance px			7
		shi_07m_m67_a3_002_Max_ Reg.xlsx_RoiSetAuto-21.zip Distance px			5
		shi_07m_m67_a3_002_Max_ Reg.xlsx_RoiSetAuto-22.zip Distance px			4
		shi_07m_m67_a3_002_Max_ Reg.xlsx_RoiSetAuto-24.zip Distance px			7
		shi_07m_m67_a3_002_Max_ Reg.xlsx_RoiSetAuto-25.zip Distance px			12
		shi_07m_m67_a3_002_Max_ Reg.xlsx_RoiSetAuto-26.zip Distance px			4
		shi_07m_m67_a3_002_Max_ Reg.xlsx_RoiSetAuto-27.zip Distance px			7
		shi_07m_m67_a3_002_Max_ Reg.xlsx_RoiSetAuto-28.zip Distance px			16
		shi_07m_m67_a3_002_Max_ Reg.xlsx_RoiSetAuto-29.zip Distance px			4
		shi_07m_m67_a3_002_Max_ Reg.xlsx_RoiSetAuto-3.zip Distance px			109
		shi_07m_m67_a3_002_Max_ Reg.xlsx_RoiSetAuto-30.zip Distance px			4
		shi_07m_m67_a3_002_Max_ Reg.xlsx_RoiSetAuto-4.zip Distance px			7
		shi_07m_m67_a3_002_Max_ Reg.xlsx_RoiSetAuto-5.zip Distance px			68
		shi_07m_m67_a3_002_Max_ Reg.xlsx_RoiSetAuto-6.zip Distance px			5
		shi_07m_m67_a3_002_Max_ Reg.xlsx_RoiSetAuto-7.zip Distance px			9
