# Supplementary material for: An autoinhibitory clamp of actin assembly constrains and directs synaptic endocytosis
Source: eLife journal article supplement (doi:10.7554/elife.69597), 2021-07-29
Supplement: fig7-data1 [file Figure 7F-G_source data_NwkFM.xlsx]

## Sheet: Sheet1
						3384.06	2231.49	955.565		4231.78	2790.49	1194.94
	File	CellArea	CellArea	CellArea		FM Mean
		Cut-Con	Cut-nwk	cut-Shi		Cut-Con	Cut-nwk	cut-Shi		Cut-Con	Cut-nwk	cut-Shi		Cut-Con	Cut-nwk	cut-Shi
1	cleaned_Cut_Con_02_m67_001.tif	369.087	492.05	462.963		2190.56	4528.29	1191.1		2739.3	5662.65	1489.48		64.7318	133.812	35.1974
2	cleaned_Cut_Con_02_m67_002.tif	363.161	381.531	533.284		3376.52	2565.36	731.383		4222.36	3207.99	914.598		99.7774	75.8071	21.6126
3	cleaned_Cut_Con_02_m67_003.tif	314.321	767.161	678.124		1780.42	823.681	705.139		2226.43	1030.02	881.78		52.612	24.3401	20.8371
4	cleaned_Cut_Con_02_m67_004.tif	751.753	200.79	295.408		3109.28	3931.76	1465.21		3888.17	4916.68	1832.25		91.8803	116.185	43.2973
5	cleaned_Cut_Con_02_m67_005.tif	70.5679	322.371	540.099		3743.32	2700.44	940.82		4681.04	3376.91	1176.5		110.616	79.7989	27.8015
6	cleaned_Cut_Con_02_m67_006.tif	169.728	380.84	226.617		2034.65	1273.62	1001.85		2544.33	1592.67	1252.82		60.1245	37.636	29.6049
19	cleaned_Cut_Con_m67_001.tif	522.618	544	327.556		3790.19	2161	873.388		4739.66	2702.34	1092.18		112.001	63.8582	25.8089
20	cleaned_Cut_Con_m67_002.tif	338.173	1435.51	240.148		2659.67	1189.59	891.053		3325.93	1487.58	1114.27		78.5942	35.1527	26.3309
21	cleaned_Cut_Con_m67_003.tif	252.296	621.827	380.05		1541.31	1504.72	861.132		1927.41	1881.66	1076.85		45.5461	44.4651	25.4467
22	cleaned_Cut_Con_m67_004.tif	399.951	266.617	504.84		3548.18	1738.97	860.704		4437.01	2174.59	1076.31		104.85	51.3873	25.4341
23	cleaned_Cut_Con_m67_005.tif	385.729	202.766	311.951		1993.57	3851.15	753.973		2492.97	4815.88	942.847		58.9108	113.803	22.2802
7	cleaned_Cut_con_03_m67_001.tif	713.482	891.309	830.371		4799.98	2403.73	1414.65		6002.4	3005.88	1769.02		141.841	71.0311	41.8033
8	cleaned_Cut_con_03_m67_002.tif	364.099	38.7161	498.618		4296.03	1285.45	1307.72		5372.2	1607.46	1635.31		126.949	37.9855	38.6436
9	cleaned_Cut_con_03_m67_003.tif	138.568	469.136	675.408		3017.44	2211.4	1024.98		3773.32	2765.36	1281.75		89.1662	65.3475	30.2886
10	cleaned_Cut_con_03_m67_004.tif	582.618	373.975	301.877		4109.58	492.888	994.757		5139.05	616.359	1243.95		121.439	14.565	29.3954
11	cleaned_Cut_con_03_m67_005.tif	237.877	120.988	419.901		5443.69	2548.39	1312.17		6807.36	3186.78	1640.87		160.863	75.3058	38.7749
12	cleaned_Cut_con_03_m67_006.tif	384.692	306.074	440.741		3441.53	946.809	943.145		4303.65	1183.99	1179.41		101.698	27.9785	27.8703
13	cleaned_Cut_con_04_m67_001.tif	759.704	261.136	730.371		3040.63	3315.6	802.612		3802.32	4146.17	1003.67		89.8516	97.9771	23.7175
14	cleaned_Cut_con_04_m67_002.tif	293.087	653.778	533.087		3654.48	2198.7	709.78		4569.94	2749.49	887.583		107.991	64.9724	20.9742
15	cleaned_Cut_con_04_m67_003.tif	594.42	287.951	164		2677.44	2479.01	685.983		3348.15	3100.02	857.825		79.1191	73.2556	20.271
16	cleaned_Cut_con_04_m67_004.tif	383.062	548.05	523.901		4235.7	2205.9	893.746		5296.76	2758.49	1117.63		125.166	65.1851	26.4105
17	cleaned_Cut_con_04_m67_005.tif	261.383	568	262.42		5036.8	2005.43	634.101		6298.54	2507.8	792.946		148.839	59.2612	18.7379
18	cleaned_Cut_con_04_m67_006.tif	231.309	208.395	348.593		4312.35	1869.02	978.608		5392.61	2337.22	1223.75		127.431	55.2302	28.9182
24	cleaned_Cut_nwk_01_m67_001.tif		195.951				3324.87				4157.76				98.251
25	cleaned_Cut_nwk_01_m67_002.tif
26	cleaned_Cut_nwk_01_m67_003.tif
27	cleaned_Cut_nwk_01_m67_004.tif
28	cleaned_Cut_nwk_01_m67_005.tif
29	cleaned_Cut_nwk_01_m67_006.tif
30	cleaned_Cut_nwk_02_m67_001.tif
31	cleaned_Cut_nwk_02_m67_002.tif
32	cleaned_Cut_nwk_02_m67_003.tif
33	cleaned_Cut_nwk_02_m67_004.tif
34	cleaned_Cut_nwk_02_m67_005.tif
35	cleaned_Cut_nwk_02_m67_006.tif
36	cleaned_Cut_nwk_03_m67_001.tif
37	cleaned_Cut_nwk_03_m67_002.tif
38	cleaned_Cut_nwk_03_m67_003.tif
39	cleaned_Cut_nwk_03_m67_004.tif
40	cleaned_Cut_nwk_03_m67_005.tif
41	cleaned_Cut_nwk_03_m67_006.tif
42	cleaned_Cut_nwk_04_m67_001.tif
43	cleaned_Cut_nwk_04_m67_002.tif
44	cleaned_Cut_nwk_04_m67_003.tif
45	cleaned_Cut_nwk_04_m67_004.tif
46	cleaned_Cut_nwk_04_m67_005.tif
47	cleaned_Cut_nwk_04_m67_006.tif
48	cleaned_Cut_shi_01_m67_001.tif
49	cleaned_Cut_shi_01_m67_002.tif
50	cleaned_Cut_shi_01_m67_003.tif
51	cleaned_Cut_shi_01_m67_004.tif
52	cleaned_Cut_shi_01_m67_005.tif
53	cleaned_Cut_shi_01_m67_006.tif
54	cleaned_Cut_shi_02_m67_001.tif
55	cleaned_Cut_shi_02_m67_002.tif
56	cleaned_Cut_shi_02_m67_003.tif
57	cleaned_Cut_shi_02_m67_004.tif
58	cleaned_Cut_shi_02_m67_005.tif
59	cleaned_Cut_shi_02_m67_006.tif
60	cleaned_Cut_shi_03_m67_001.tif
61	cleaned_Cut_shi_03_m67_002.tif
62	cleaned_Cut_shi_03_m67_003.tif
63	cleaned_Cut_shi_03_m67_004.tif
64	cleaned_Cut_shi_03_m67_005.tif
65	cleaned_Cut_shi_03_m67_006.tif
66	cleaned_Cut_shi_04_m67_001.tif
67	cleaned_Cut_shi_04_m67_002.tif
68	cleaned_Cut_shi_04_m67_003.tif
69	cleaned_Cut_shi_04_m67_004.tif
70	cleaned_Cut_shi_04_m67_005.tif
71	cleaned_UnCut_con_01_m67_001.tif
72	cleaned_UnCut_con_01_m67_002.tif
73	cleaned_UnCut_con_01_m67_003.tif
74	cleaned_UnCut_con_01_m67_004.tif
75	cleaned_UnCut_con_01_m67_005.tif
76	cleaned_UnCut_con_02_m67_001.tif
77	cleaned_UnCut_con_02_m67_002.tif
78	cleaned_UnCut_con_02_m67_003.tif
79	cleaned_UnCut_con_02_m67_004.tif
80	cleaned_UnCut_con_02_m67_005.tif
81	cleaned_UnCut_con_02_m67_006.tif
82	cleaned_UnCut_con_03_m67_001.tif
83	cleaned_UnCut_con_03_m67_002.tif
84	cleaned_UnCut_con_03_m67_003.tif
85	cleaned_UnCut_con_03_m67_004.tif
86	cleaned_UnCut_con_03_m67_005.tif
87	cleaned_UnCut_con_03_m67_006.tif
88	cleaned_UnCut_con_04_m67_001.tif
89	cleaned_UnCut_con_04_m67_002.tif
90	cleaned_UnCut_con_04_m67_003.tif
91	cleaned_UnCut_con_04_m67_004.tif
92	cleaned_UnCut_con_04_m67_005.tif
93	cleaned_UnCut_con_04_m67_006.tif
94	cleaned_UnCut_nwk_01_m67_001.tif
95	cleaned_UnCut_nwk_01_m67_002.tif
96	cleaned_UnCut_nwk_01_m67_003.tif
97	cleaned_UnCut_nwk_01_m67_004.tif
98	cleaned_UnCut_nwk_01_m67_005.tif
99	cleaned_UnCut_nwk_01_m67_006.tif
100	cleaned_UnCut_nwk_02_m67_001.tif
101	cleaned_UnCut_nwk_02_m67_002.tif
102	cleaned_UnCut_nwk_02_m67_003.tif
103	cleaned_UnCut_nwk_02_m67_004.tif
104	cleaned_UnCut_nwk_02_m67_005.tif
105	cleaned_UnCut_nwk_02_m67_006.tif
106	cleaned_UnCut_nwk_03_m67_001.tif
107	cleaned_UnCut_nwk_03_m67_002.tif
108	cleaned_UnCut_nwk_03_m67_003.tif
109	cleaned_UnCut_nwk_03_m67_004.tif
110	cleaned_UnCut_nwk_03_m67_005.tif
111	cleaned_UnCut_nwk_03_m67_006.tif
112	cleaned_UnCut_nwk_04_m67_001.tif
113	cleaned_UnCut_nwk_04_m67_002.tif
114	cleaned_UnCut_nwk_04_m67_003.tif
115	cleaned_UnCut_nwk_04_m67_004.tif
116	cleaned_UnCut_nwk_04_m67_005.tif
117	cleaned_UnCut_nwk_04_m67_006.tif
118	cleaned_UnCut_shi_01_m67_001.tif
119	cleaned_UnCut_shi_01_m67_002.tif
120	cleaned_UnCut_shi_01_m67_003.tif
121	cleaned_UnCut_shi_01_m67_004.tif
122	cleaned_UnCut_shi_01_m67_005.tif
123	cleaned_UnCut_shi_01_m67_006.tif
124	cleaned_UnCut_shi_02_m67_001.tif
125	cleaned_UnCut_shi_02_m67_002.tif
126	cleaned_UnCut_shi_02_m67_003.tif
127	cleaned_UnCut_shi_02_m67_004.tif
128	cleaned_UnCut_shi_02_m67_005.tif
129	cleaned_UnCut_shi_02_m67_006.tif
130	cleaned_UnCut_shi_03_m67_001.tif
131	cleaned_UnCut_shi_03_m67_002.tif
132	cleaned_UnCut_shi_03_m67_003.tif
133	cleaned_UnCut_shi_03_m67_004.tif
134	cleaned_UnCut_shi_03_m67_005.tif
135	cleaned_UnCut_shi_03_m67_006.tif
136	cleaned_UnCut_shi_04_m67_001.tif
137	cleaned_UnCut_shi_04_m67_002.tif
138	cleaned_UnCut_shi_04_m67_003.tif
139	cleaned_UnCut_shi_04_m67_004.tif
140	cleaned_UnCut_shi_04_m67_005.tif
141	cleaned_UnCut_shi_04_m67_006.tif
