# Supplementary material for: An autoinhibitory clamp of actin assembly constrains and directs synaptic endocytosis
Source: eLife journal article supplement (doi:10.7554/elife.69597), 2021-07-29
Supplement: fig7-data1 [file Figure 7H-I_source data_Dap160FM.xlsx]

## Sheet: Filtered 2 FL
This sheet filters two FL control NMJs that I had imaged twice due to the lens being dirty (marked red).																					100	114.401	72.6784	15.7462
		11472.2
File	PreArea	FM Mean	FM CoV	RFP Mean	RFP CoV	FM Norm			PreArea	FM Mean	FM CoV	RFP Mean	RFP CoV	FM Norm			FM Norm	FM Norm			FL	dD	dCD	shi			FL
cleaned_SD516_Dish1_DFL_m67_a3_001.tif	727.309	14018.8	0.53025	3762.17	0.40468	104.667		cleaned_SD516_Dish1_shi_m67_a3_001.tif	431.901	1750.57	0.43389	2138.63	0.3892	13.0701		shi1	104.667	13.0701			86.8525	55.0937	76.2805	13.0701
cleaned_SD516_Dish1_DFL_m67_a3_003.tif	554.618	13935.9	0.48995	4098.04	0.41095	104.048		cleaned_SD516_Dish1_shi_m67_a3_004.tif	165.185	1735.54	0.36261	2230.87	0.32972	12.9579		shi1	104.048	12.9579			119.443	81.435	67.6772	12.9579
cleaned_SD516_Dish1_DFL_m67_a4_002.tif	1073.58	14556.9	0.53765	4526.31	0.482	108.685		cleaned_SD516_Dish1_shi_m67_a4_002.tif	1408.54	2624.05	0.42915	2378.97	0.32428	19.5917		shi1	108.685	19.5917			104.713	129.846	70.8452	19.5917
cleaned_SD516_Dish1_DFL_m67_a4_004.tif	323.704	11063.1	0.67496	1908.59	0.6187	82.5997		cleaned_SD516_Dish1_shi_m67_a4_003.tif	941.729	2157.75	0.49014	1937.61	0.43198	16.1102		shi1	82.5997	16.1102			88.9917	81.9153	58.0308	16.1102
																					107.9	94.3772	93.3453	15.1534
cleaned_SD516_Dish2_dfl_m67_a3_001.tif	1789.88	11759.4	0.61648	2249.25	0.52843	86.8525		cleaned_SD516_Dish2_ddd_m67_a3_001.tif	847.062	7459.41	0.54403	1411.26	0.47389	55.0937		dd1	86.8525	55.0937			73.4645	164.373	95.1421	15.3495
cleaned_SD516_Dish2_dfl_m67_a3_004.tif	1280.25	16172	0.43619	2605.84	0.40209	119.443		cleaned_SD516_Dish2_ddd_m67_a3_004.tif	1919.41	11025.9	0.52637	1658.55	0.48484	81.435		dd1	119.443	81.435			108.41	98.7844	86.5115	13.1267
cleaned_SD516_Dish2_dfl_m67_a4_002.tif	908.247	14177.6	0.61334	2381.4	0.52336	104.713		cleaned_SD516_Dish2_ddd_m67_a4_002.tif	1011.61	17580.5	0.3874	4184.87	0.31395	129.846		dd1	104.713	129.846			110.226	141.104	62.5118	20.6099
cleaned_SD516_Dish2_dfl_m67_a4_003.tif	453.679	12049	0.66485	2352.68	0.538	88.9917		cleaned_SD516_Dish2_ddd_m67_a4_003.tif	840	11090.9	0.51339	1678.79	0.48554	81.9153		dd1	88.9917	81.9153			89.4404	120.066	46.1727
																					102.913	137.84	70.8252
cleaned_SD516_Dish3_dfl_m67_a3_001.tif								cleaned_SD516_Dish3_dcd_m67_a3_001.tif	1266.17	10883.3	0.4585	2788.33	0.50941	76.2805		dcd1		76.2805			105.714	141.207	75.5589
cleaned_SD516_Dish3_dfl_m67_a3_003.tif								cleaned_SD516_Dish3_dcd_m67_a3_004.tif	1129.43	9655.84	0.42512	2177.93	0.41405	67.6772		dcd1		67.6772			101.933	126.771	69.2394
cleaned_SD516_Dish3_dfl_m67_a3_004.tif	1550.77	11514.9	0.41208	3040.89	0.46442	80.7074		cleaned_SD516_Dish3_dcd_m67_a4_002.tif	424.247	10107.8	0.52116	2806.47	0.55281	70.8452		dcd1	102.587	70.8452			67.7213
cleaned_SD516_Dish3_dfl_m67_a4_002.tif	260.494	17020.1	0.29213	4846.49	0.28761	119.293		cleaned_SD516_Dish3_dcd_m67_a4_003.tif	554.963	8279.55	0.35313	5157.92	0.39341	58.0308		dcd1	151.632	58.0308			78.0601
																					102.587
cleaned_SD516_Dish4_dfl_m67_a3_001.tif	2094.77	11500.7	0.53089	3344.42	0.50384	82.9149		cleaned_SD516_Dish4_dcd_m67_a3_001.tif	751.753	12947.4	0.50246	3873.48	0.41042	93.3453		dcd2	82.9149	93.3453			151.632
cleaned_SD516_Dish4_dfl_m67_a3_004.tif	1452.05	10779.8	0.60744	2040.24	0.53124	77.7181		cleaned_SD516_Dish4_dcd_m67_a3_004.tif	722.173	13196.6	0.43786	5273.88	0.43121	95.1421		dcd2	77.7181	95.1421			82.9149
cleaned_SD516_Dish4_dfl_m67_a4_002.tif	1336.1	17924.8	0.5164	2478.99	0.44365	129.23		cleaned_SD516_Dish4_dcd_m67_a4_002.tif	1146.47	11999.5	0.53903	3034.83	0.4453	86.5115		dcd2	129.23	86.5115			77.7181
cleaned_SD516_Dish4_dfl_m67_a4_003.tif	854.963	15276.5	0.4508	2853.42	0.39151	110.137		cleaned_SD516_Dish4_dcd_m67_a4_003.tif	376.247	8670.67	0.36816	2450.9	0.50161	62.5118		dcd2	110.137	62.5118			129.23
																					110.137
cleaned_SD516_Dish5_dfl_m67_a3_001.tif	943.951	11402.4	0.42128	3310.87	0.39954	107.9		cleaned_SD516_Dish5_ddd_m67_a3_001.tif	1390.67	9973.4	0.64824	2140.53	0.46354	94.3772		dd2	107.9	94.3772			100.782
cleaned_SD516_Dish5_dfl_m67_a3_004.tif	1249.73	7763.43	0.46432	3155.75	0.46493	73.4645		cleaned_SD516_Dish5_ddd_m67_a3_004.tif	231.506	17370.3	0.34165	5434.87	0.26924	164.373		dd2	73.4645	164.373			89.7418
cleaned_SD516_Dish5_dfl_m67_a4_002.tif	492.79	11456.3	0.54597	3642.11	0.53112	108.41		cleaned_SD516_Dish5_ddd_m67_a4_002.tif	333.383	10439.1	0.57436	2640.24	0.41957	98.7844		dd2	108.41	98.7844			95.6046
cleaned_SD516_Dish5_dfl_m67_a4_003.tif	721.186	11648.2	0.47445	4740.52	0.41405	110.226		cleaned_SD516_Dish5_ddd_m67_a4_003.tif	528.84	14911.3	0.47158	3027.37	0.35833	141.104		dd2	110.226	141.104			113.871
																					104.667
cleaned_SD516_Dish6_dfl_m67_a3_001.tif	3307.11	4588.7	0.98215	1563.76	0.60155	60.167		cleaned_SD516_Dish6_shi_m67_a3_001.tif	2122.08	1155.69	0.49658	1082.58	0.48227	15.1534		shi2	60.167	15.1534			104.048
cleaned_SD516_Dish6_dfl_m67_a3_004.tif	1285.83	8480.55	0.50687	2274.35	0.47479	111.197		cleaned_SD516_Dish6_shi_m67_a3_004.tif	1364.84	1170.65	0.4902	1048.4	0.45502	15.3495		shi2	111.197	15.3495			108.685
cleaned_SD516_Dish6_dfl_m67_a4_002.tif	964.297	9729.12	0.447	2697.95	0.41089	127.568		cleaned_SD516_Dish6_shi_m67_a4_002.tif	1713.33	1001.12	0.56976	1124.06	0.58023	13.1267		shi2	127.568	13.1267			82.5997
cleaned_SD516_Dish6_dfl_m67_a4_003.tif	1474.22	7708.06	0.5677	2528.53	0.53623	101.068		cleaned_SD516_Dish6_shi_m67_a4_003.tif	1875.75	1571.84	0.48404	1262.5	0.47085	20.6099		shi2	101.068	20.6099			60.167
																					111.197
cleaned_SD516_Dish7_dfl_m67_a3_001.tif	2109.58	8331.62	0.6925	2976.92	0.53509	89.4404		cleaned_SD516_Dish7_ddd_m67_a3_001.tif	1798.17	11184.5	0.48293	2895.01	0.39781	120.066		dd3	89.4404	120.066			127.568
cleaned_SD516_Dish7_dfl_m67_a4_002.tif	785.186	9586.59	0.60978	2346.02	0.49518	102.913		cleaned_SD516_Dish7_ddd_m67_a3_004.tif	992.84	12840.2	0.40519	3558.82	0.35385	137.84		dd3	102.913	137.84			101.068
cleaned_SD516_Dish7_dfl_m67_a4_003.tif	844.099	9847.57	0.60555	3493.13	0.48973	105.714		cleaned_SD516_Dish7_ddd_m67_a4_002.tif	450.321	13153.8	0.46914	3634.55	0.3721	141.207		dd3	105.714	141.207
cleaned_SD516_Dish7_dfl_m67_a4_004.tif	858.47	9495.32	0.4352	4699.35	0.3673	101.933		cleaned_SD516_Dish7_ddd_m67_a4_003.tif	429.679	11809.1	0.50323	3233.14	0.4194	126.771		dd3	101.933	126.771
cleaned_SD516_Dish8_dfl_m67_a3_001.tif	1493.68	10677.6	0.60537	1962.38	0.50532	100.782		cleaned_SD516_Dish8_dcd_m67_a3_001.tif	1598.77	4891.86	0.64499	1626.32	0.59262	46.1727		dcd3	100.782	46.1727
cleaned_SD516_Dish8_dfl_m67_a3_002.tif	633.087	9507.88	0.51145	3426.37	0.41539	89.7418		cleaned_SD516_Dish8_dcd_m67_a3_002.tif	2126.37	7503.72	0.59255	2128.02	0.55202	70.8252		dcd3	89.7418	70.8252
cleaned_SD516_Dish8_dfl_m67_a3_004.tif	2197.14	10129	0.54782	3666.52	0.44559	95.6046		cleaned_SD516_Dish8_dcd_m67_a3_004.tif	226.321	8005.24	0.37301	2417.75	0.36589	75.5589		dcd3	95.6046	75.5589
cleaned_SD516_Dish8_dfl_m67_a4_003.tif	775.457	12064.3	0.63588	2115.87	0.54394	113.871		cleaned_SD516_Dish8_dcd_m67_a4_003.tif	1268.45	7335.71	0.46023	2236.28	0.45888	69.2394		dcd3	113.871	69.2394

## Sheet: Organized
File	PreArea	FM Mean	FM CoV	RFP Mean	RFP CoV	FM Norm			PreArea	FM Mean	FM CoV	RFP Mean	RFP CoV	FM Norm			FM Norm	FM Norm			FL	dD	dCD	shi			FL
cleaned_SD516_Dish1_DFL_m67_a3_001.tif	727.309	14018.8	0.53025	3762.17	0.40468	104.667		cleaned_SD516_Dish1_shi_m67_a3_001.tif	431.901	1750.57	0.43389	2138.63	0.3892	13.0701		shi1	104.667	13.0701			86.8525	55.0937	96.9596	13.0701
cleaned_SD516_Dish1_DFL_m67_a3_003.tif	554.618	13935.9	0.48995	4098.04	0.41095	104.048		cleaned_SD516_Dish1_shi_m67_a3_004.tif	165.185	1735.54	0.36261	2230.87	0.32972	12.9579		shi1	104.048	12.9579			119.443	81.435	86.024	12.9579
cleaned_SD516_Dish1_DFL_m67_a4_002.tif	1073.58	14556.9	0.53765	4526.31	0.482	108.685		cleaned_SD516_Dish1_shi_m67_a4_002.tif	1408.54	2624.05	0.42915	2378.97	0.32428	19.5917		shi1	108.685	19.5917			104.713	129.846	90.0508	19.5917
cleaned_SD516_Dish1_DFL_m67_a4_004.tif	323.704	11063.1	0.67496	1908.59	0.6187	82.5997		cleaned_SD516_Dish1_shi_m67_a4_003.tif	941.729	2157.75	0.49014	1937.61	0.43198	16.1102		shi1	82.5997	16.1102			88.9917	81.9153	73.7626	16.1102
																					107.9	94.3772	93.3453	15.1534
cleaned_SD516_Dish2_dfl_m67_a3_001.tif	1789.88	11759.4	0.61648	2249.25	0.52843	86.8525		cleaned_SD516_Dish2_ddd_m67_a3_001.tif	847.062	7459.41	0.54403	1411.26	0.47389	55.0937		dd1	86.8525	55.0937			73.4645	164.373	95.1421	15.3495
cleaned_SD516_Dish2_dfl_m67_a3_004.tif	1280.25	16172	0.43619	2605.84	0.40209	119.443		cleaned_SD516_Dish2_ddd_m67_a3_004.tif	1919.41	11025.9	0.52637	1658.55	0.48484	81.435		dd1	119.443	81.435			108.41	98.7844	86.5115	13.1267
cleaned_SD516_Dish2_dfl_m67_a4_002.tif	908.247	14177.6	0.61334	2381.4	0.52336	104.713		cleaned_SD516_Dish2_ddd_m67_a4_002.tif	1011.61	17580.5	0.3874	4184.87	0.31395	129.846		dd1	104.713	129.846			110.226	141.104	62.5118	20.6099
cleaned_SD516_Dish2_dfl_m67_a4_003.tif	453.679	12049	0.66485	2352.68	0.538	88.9917		cleaned_SD516_Dish2_ddd_m67_a4_003.tif	840	11090.9	0.51339	1678.79	0.48554	81.9153		dd1	88.9917	81.9153			89.4404	120.066	46.1727
																					102.913	137.84	70.8252
cleaned_SD516_Dish3_dfl_m67_a3_001.tif	131.457	7601.44	0.35899	1972.88	0.34575	67.7213		cleaned_SD516_Dish3_dcd_m67_a3_001.tif	1266.17	10883.3	0.4585	2788.33	0.50941	96.9596		dcd1	67.7213	96.9596			105.714	141.207	75.5589
cleaned_SD516_Dish3_dfl_m67_a3_003.tif	676.148	8761.93	0.41408	2228.07	0.38432	78.0601		cleaned_SD516_Dish3_dcd_m67_a3_004.tif	1129.43	9655.84	0.42512	2177.93	0.41405	86.024		dcd1	78.0601	86.024			101.933	126.771	69.2394
cleaned_SD516_Dish3_dfl_m67_a3_004.tif	1550.77	11514.9	0.41208	3040.89	0.46442	102.587		cleaned_SD516_Dish3_dcd_m67_a4_002.tif	424.247	10107.8	0.52116	2806.47	0.55281	90.0508		dcd1	102.587	90.0508			67.7213
cleaned_SD516_Dish3_dfl_m67_a4_002.tif	260.494	17020.1	0.29213	4846.49	0.28761	151.632		cleaned_SD516_Dish3_dcd_m67_a4_003.tif	554.963	8279.55	0.35313	5157.92	0.39341	73.7626		dcd1	151.632	73.7626			78.0601
																					102.587
cleaned_SD516_Dish4_dfl_m67_a3_001.tif	2094.77	11500.7	0.53089	3344.42	0.50384	82.9149		cleaned_SD516_Dish4_dcd_m67_a3_001.tif	751.753	12947.4	0.50246	3873.48	0.41042	93.3453		dcd2	82.9149	93.3453			151.632
cleaned_SD516_Dish4_dfl_m67_a3_004.tif	1452.05	10779.8	0.60744	2040.24	0.53124	77.7181		cleaned_SD516_Dish4_dcd_m67_a3_004.tif	722.173	13196.6	0.43786	5273.88	0.43121	95.1421		dcd2	77.7181	95.1421			82.9149
cleaned_SD516_Dish4_dfl_m67_a4_002.tif	1336.1	17924.8	0.5164	2478.99	0.44365	129.23		cleaned_SD516_Dish4_dcd_m67_a4_002.tif	1146.47	11999.5	0.53903	3034.83	0.4453	86.5115		dcd2	129.23	86.5115			77.7181
cleaned_SD516_Dish4_dfl_m67_a4_003.tif	854.963	15276.5	0.4508	2853.42	0.39151	110.137		cleaned_SD516_Dish4_dcd_m67_a4_003.tif	376.247	8670.67	0.36816	2450.9	0.50161	62.5118		dcd2	110.137	62.5118			129.23
																					110.137
cleaned_SD516_Dish5_dfl_m67_a3_001.tif	943.951	11402.4	0.42128	3310.87	0.39954	107.9		cleaned_SD516_Dish5_ddd_m67_a3_001.tif	1390.67	9973.4	0.64824	2140.53	0.46354	94.3772		dd2	107.9	94.3772			100.782
cleaned_SD516_Dish5_dfl_m67_a3_004.tif	1249.73	7763.43	0.46432	3155.75	0.46493	73.4645		cleaned_SD516_Dish5_ddd_m67_a3_004.tif	231.506	17370.3	0.34165	5434.87	0.26924	164.373		dd2	73.4645	164.373			89.7418
cleaned_SD516_Dish5_dfl_m67_a4_002.tif	492.79	11456.3	0.54597	3642.11	0.53112	108.41		cleaned_SD516_Dish5_ddd_m67_a4_002.tif	333.383	10439.1	0.57436	2640.24	0.41957	98.7844		dd2	108.41	98.7844			95.6046
cleaned_SD516_Dish5_dfl_m67_a4_003.tif	721.186	11648.2	0.47445	4740.52	0.41405	110.226		cleaned_SD516_Dish5_ddd_m67_a4_003.tif	528.84	14911.3	0.47158	3027.37	0.35833	141.104		dd2	110.226	141.104			113.871
																					104.667
cleaned_SD516_Dish6_dfl_m67_a3_001.tif	3307.11	4588.7	0.98215	1563.76	0.60155	60.167		cleaned_SD516_Dish6_shi_m67_a3_001.tif	2122.08	1155.69	0.49658	1082.58	0.48227	15.1534		shi2	60.167	15.1534			104.048
cleaned_SD516_Dish6_dfl_m67_a3_004.tif	1285.83	8480.55	0.50687	2274.35	0.47479	111.197		cleaned_SD516_Dish6_shi_m67_a3_004.tif	1364.84	1170.65	0.4902	1048.4	0.45502	15.3495		shi2	111.197	15.3495			108.685
cleaned_SD516_Dish6_dfl_m67_a4_002.tif	964.297	9729.12	0.447	2697.95	0.41089	127.568		cleaned_SD516_Dish6_shi_m67_a4_002.tif	1713.33	1001.12	0.56976	1124.06	0.58023	13.1267		shi2	127.568	13.1267			82.5997
cleaned_SD516_Dish6_dfl_m67_a4_003.tif	1474.22	7708.06	0.5677	2528.53	0.53623	101.068		cleaned_SD516_Dish6_shi_m67_a4_003.tif	1875.75	1571.84	0.48404	1262.5	0.47085	20.6099		shi2	101.068	20.6099			60.167
																					111.197
cleaned_SD516_Dish7_dfl_m67_a3_001.tif	2109.58	8331.62	0.6925	2976.92	0.53509	89.4404		cleaned_SD516_Dish7_ddd_m67_a3_001.tif	1798.17	11184.5	0.48293	2895.01	0.39781	120.066		dd3	89.4404	120.066			127.568
cleaned_SD516_Dish7_dfl_m67_a4_002.tif	785.186	9586.59	0.60978	2346.02	0.49518	102.913		cleaned_SD516_Dish7_ddd_m67_a3_004.tif	992.84	12840.2	0.40519	3558.82	0.35385	137.84		dd3	102.913	137.84			101.068
cleaned_SD516_Dish7_dfl_m67_a4_003.tif	844.099	9847.57	0.60555	3493.13	0.48973	105.714		cleaned_SD516_Dish7_ddd_m67_a4_002.tif	450.321	13153.8	0.46914	3634.55	0.3721	141.207		dd3	105.714	141.207
cleaned_SD516_Dish7_dfl_m67_a4_004.tif	858.47	9495.32	0.4352	4699.35	0.3673	101.933		cleaned_SD516_Dish7_ddd_m67_a4_003.tif	429.679	11809.1	0.50323	3233.14	0.4194	126.771		dd3	101.933	126.771
cleaned_SD516_Dish8_dfl_m67_a3_001.tif	1493.68	10677.6	0.60537	1962.38	0.50532	100.782		cleaned_SD516_Dish8_dcd_m67_a3_001.tif	1598.77	4891.86	0.64499	1626.32	0.59262	46.1727		dcd3	100.782	46.1727
cleaned_SD516_Dish8_dfl_m67_a3_002.tif	633.087	9507.88	0.51145	3426.37	0.41539	89.7418		cleaned_SD516_Dish8_dcd_m67_a3_002.tif	2126.37	7503.72	0.59255	2128.02	0.55202	70.8252		dcd3	89.7418	70.8252
cleaned_SD516_Dish8_dfl_m67_a3_004.tif	2197.14	10129	0.54782	3666.52	0.44559	95.6046		cleaned_SD516_Dish8_dcd_m67_a3_004.tif	226.321	8005.24	0.37301	2417.75	0.36589	75.5589		dcd3	95.6046	75.5589
cleaned_SD516_Dish8_dfl_m67_a4_003.tif	775.457	12064.3	0.63588	2115.87	0.54394	113.871		cleaned_SD516_Dish8_dcd_m67_a4_003.tif	1268.45	7335.71	0.46023	2236.28	0.45888	69.2394		dcd3	113.871	69.2394

## Sheet: Presynaptic-Intensity_CoV
File	PreArea	Ch-1_Mean	Ch-1_CoV	Ch-2_Mean	Ch-2_CoV
cleaned_SD516_Dish1_DFL_m67_a3_001.tif	727.309	14018.8	0.53025	3762.17	0.40468
cleaned_SD516_Dish1_DFL_m67_a3_003.tif	554.618	13935.9	0.48995	4098.04	0.41095
cleaned_SD516_Dish1_DFL_m67_a4_002.tif	1073.58	14556.9	0.53765	4526.31	0.482
cleaned_SD516_Dish1_DFL_m67_a4_004.tif	323.704	11063.1	0.67496	1908.59	0.6187
cleaned_SD516_Dish1_shi_m67_a3_001.tif	431.901	1750.57	0.43389	2138.63	0.3892
cleaned_SD516_Dish1_shi_m67_a3_004.tif	165.185	1735.54	0.36261	2230.87	0.32972
cleaned_SD516_Dish1_shi_m67_a4_002.tif	1408.54	2624.05	0.42915	2378.97	0.32428
cleaned_SD516_Dish1_shi_m67_a4_003.tif	941.729	2157.75	0.49014	1937.61	0.43198
cleaned_SD516_Dish2_ddd_m67_a3_001.tif	847.062	7459.41	0.54403	1411.26	0.47389
cleaned_SD516_Dish2_ddd_m67_a3_004.tif	1919.41	11025.9	0.52637	1658.55	0.48484
cleaned_SD516_Dish2_ddd_m67_a4_002.tif	1011.61	17580.5	0.3874	4184.87	0.31395
cleaned_SD516_Dish2_ddd_m67_a4_003.tif	840	11090.9	0.51339	1678.79	0.48554
cleaned_SD516_Dish2_dfl_m67_a3_001.tif	1789.88	11759.4	0.61648	2249.25	0.52843
cleaned_SD516_Dish2_dfl_m67_a3_004.tif	1280.25	16172	0.43619	2605.84	0.40209
cleaned_SD516_Dish2_dfl_m67_a4_002.tif	908.247	14177.6	0.61334	2381.4	0.52336
cleaned_SD516_Dish2_dfl_m67_a4_003.tif	453.679	12049	0.66485	2352.68	0.538
cleaned_SD516_Dish3_dcd_m67_a3_001.tif	1266.17	10883.3	0.4585	2788.33	0.50941
cleaned_SD516_Dish3_dcd_m67_a3_004.tif	1129.43	9655.84	0.42512	2177.93	0.41405
cleaned_SD516_Dish3_dcd_m67_a4_002.tif	424.247	10107.8	0.52116	2806.47	0.55281
cleaned_SD516_Dish3_dcd_m67_a4_003.tif	554.963	8279.55	0.35313	5157.92	0.39341
cleaned_SD516_Dish3_dfl_m67_a3_001.tif	131.457	7601.44	0.35899	1972.88	0.34575
cleaned_SD516_Dish3_dfl_m67_a3_003.tif	676.148	8761.93	0.41408	2228.07	0.38432
cleaned_SD516_Dish3_dfl_m67_a3_004.tif	1550.77	11514.9	0.41208	3040.89	0.46442
cleaned_SD516_Dish3_dfl_m67_a4_002.tif	260.494	17020.1	0.29213	4846.49	0.28761
cleaned_SD516_Dish4_dcd_m67_a3_001.tif	751.753	12947.4	0.50246	3873.48	0.41042
cleaned_SD516_Dish4_dcd_m67_a3_004.tif	722.173	13196.6	0.43786	5273.88	0.43121
cleaned_SD516_Dish4_dcd_m67_a4_002.tif	1146.47	11999.5	0.53903	3034.83	0.4453
cleaned_SD516_Dish4_dcd_m67_a4_003.tif	376.247	8670.67	0.36816	2450.9	0.50161
cleaned_SD516_Dish4_dfl_m67_a3_001.tif	2094.77	11500.7	0.53089	3344.42	0.50384
cleaned_SD516_Dish4_dfl_m67_a3_004.tif	1452.05	10779.8	0.60744	2040.24	0.53124
cleaned_SD516_Dish4_dfl_m67_a4_002.tif	1336.1	17924.8	0.5164	2478.99	0.44365
cleaned_SD516_Dish4_dfl_m67_a4_003.tif	854.963	15276.5	0.4508	2853.42	0.39151
cleaned_SD516_Dish5_ddd_m67_a3_001.tif	1390.67	9973.4	0.64824	2140.53	0.46354
cleaned_SD516_Dish5_ddd_m67_a3_004.tif	231.506	17370.3	0.34165	5434.87	0.26924
cleaned_SD516_Dish5_ddd_m67_a4_002.tif	333.383	10439.1	0.57436	2640.24	0.41957
cleaned_SD516_Dish5_ddd_m67_a4_003.tif	528.84	14911.3	0.47158	3027.37	0.35833
cleaned_SD516_Dish5_dfl_m67_a3_001.tif	943.951	11402.4	0.42128	3310.87	0.39954
cleaned_SD516_Dish5_dfl_m67_a3_004.tif	1249.73	7763.43	0.46432	3155.75	0.46493
cleaned_SD516_Dish5_dfl_m67_a4_002.tif	492.79	11456.3	0.54597	3642.11	0.53112
cleaned_SD516_Dish5_dfl_m67_a4_003.tif	721.186	11648.2	0.47445	4740.52	0.41405
cleaned_SD516_Dish6_dfl_m67_a3_001.tif	3307.11	4588.7	0.98215	1563.76	0.60155
cleaned_SD516_Dish6_dfl_m67_a3_004.tif	1285.83	8480.55	0.50687	2274.35	0.47479
cleaned_SD516_Dish6_dfl_m67_a4_002.tif	964.297	9729.12	0.447	2697.95	0.41089
cleaned_SD516_Dish6_dfl_m67_a4_003.tif	1474.22	7708.06	0.5677	2528.53	0.53623
cleaned_SD516_Dish6_shi_m67_a3_001.tif	2122.08	1155.69	0.49658	1082.58	0.48227
cleaned_SD516_Dish6_shi_m67_a3_004.tif	1364.84	1170.65	0.4902	1048.4	0.45502
cleaned_SD516_Dish6_shi_m67_a4_002.tif	1713.33	1001.12	0.56976	1124.06	0.58023
cleaned_SD516_Dish6_shi_m67_a4_003.tif	1875.75	1571.84	0.48404	1262.5	0.47085
cleaned_SD516_Dish7_ddd_m67_a3_001.tif	1798.17	11184.5	0.48293	2895.01	0.39781
cleaned_SD516_Dish7_ddd_m67_a3_004.tif	992.84	12840.2	0.40519	3558.82	0.35385
cleaned_SD516_Dish7_ddd_m67_a4_002.tif	450.321	13153.8	0.46914	3634.55	0.3721
cleaned_SD516_Dish7_ddd_m67_a4_003.tif	429.679	11809.1	0.50323	3233.14	0.4194
cleaned_SD516_Dish7_dfl_m67_a3_001.tif	2109.58	8331.62	0.6925	2976.92	0.53509
cleaned_SD516_Dish7_dfl_m67_a4_002.tif	785.186	9586.59	0.60978	2346.02	0.49518
cleaned_SD516_Dish7_dfl_m67_a4_003.tif	844.099	9847.57	0.60555	3493.13	0.48973
cleaned_SD516_Dish7_dfl_m67_a4_004.tif	858.47	9495.32	0.4352	4699.35	0.3673
cleaned_SD516_Dish8_dcd_m67_a3_001.tif	1598.77	4891.86	0.64499	1626.32	0.59262
cleaned_SD516_Dish8_dcd_m67_a3_002.tif	2126.37	7503.72	0.59255	2128.02	0.55202
cleaned_SD516_Dish8_dcd_m67_a3_004.tif	226.321	8005.24	0.37301	2417.75	0.36589
cleaned_SD516_Dish8_dcd_m67_a4_003.tif	1268.45	7335.71	0.46023	2236.28	0.45888
cleaned_SD516_Dish8_dfl_m67_a3_001.tif	1493.68	10677.6	0.60537	1962.38	0.50532
cleaned_SD516_Dish8_dfl_m67_a3_002.tif	633.087	9507.88	0.51145	3426.37	0.41539
cleaned_SD516_Dish8_dfl_m67_a3_004.tif	2197.14	10129	0.54782	3666.52	0.44559
cleaned_SD516_Dish8_dfl_m67_a4_003.tif	775.457	12064.3	0.63588	2115.87	0.54394
